# Supplementary material for: Platinum(0)-η2-1,2-(E)ditosylethene Complexes Bearing Phosphine, Isocyanide and N-Heterocyclic Carbene Ligands: Synthesis and Cytotoxicity towards Ovarian and Breast Cancer Cells
Source: MDPI journal article supplement (doi:10.3390/molecules29051119), 2024-03-01

## checkCIF/PLATON report

Structure factors have been supplied for datablock(s) NC5LT

THIS REPORT IS FOR GUIDANCE ONLY. IF USED AS PART OF A REVIEW PROCEDURE FOR PUBLICATION, IT SHOULD NOT REPLACE THE EXPERTISE OF AN EXPERIENCED CRYSTALLOGRAPHIC REFEREE.

No syntax errors found.      CIF dictionary      Interpreting this report

### Datablock: NC5LT

---

Bond precision:      C-C = 0.0021 Å      Wavelength=0.62000

Cell:                      a=14.660(3)                      b=17.981(4)                      c=18.585(4)  
                              alpha=101.57(3)                      beta=96.12(3)                      gamma=98.80(3)  
Temperature:              100 K

|                        | Calculated                                          | Reported                                              |
|------------------------|-----------------------------------------------------|-------------------------------------------------------|
| Volume                 | 4695.1(19)                                          | 4695.1(18)                                            |
| Space group            | P -1                                                | P -1                                                  |
| Hall group             | -P 1                                                | -P 1                                                  |
| Moiety formula         | C52 H46 O4 P2 Pt S2, 0.3(C4 H10 O), 0.175(C H2 Cl2) | C52 H46 O4 P2 Pt S2, 0.25 (C4 H10 O), 0.25 (C H2 Cl2) |
| Sum formula            | C53.37 H49.35 Cl0.35 O4.30 P2 Pt S2                 | C53.25 H48.75 Cl0.50 O4.25 P2 Pt S2                   |
| Mr                     | 1093.08                                             | 1095.54                                               |
| Dx, g cm <sup>-3</sup> | 1.546                                               | 1.550                                                 |
| Z                      | 4                                                   | 4                                                     |
| Mu (mm <sup>-1</sup> ) | 2.245                                               | 2.251                                                 |
| F000                   | 2199.7                                              | 2203.0                                                |
| F000'                  | 2198.31                                             |                                                       |
| h, k, lmax             | 24, 29, 30                                          | 23, 29, 30                                            |
| Nref                   | 45624                                               | 41421                                                 |
| Tmin, Tmax             | 0.874, 0.956                                        |                                                       |
| Tmin'                  | 0.798                                               |                                                       |

Correction method= Not given

Data completeness= 0.908      Theta(max)= 31.129

R(reflections)= 0.0295( 39404)

wR2(reflections)=  
0.0737( 41421)

S = 1.050

Npar= 1193

---

The following ALERTS were generated. Each ALERT has the format

**test-name\_ALERT\_alert-type\_alert-level.**

Click on the hyperlinks for more details of the test.

---

### ● Alert level C

SHFSU01\_ALERT\_2\_C The absolute value of parameter shift to su ratio > 0.05

Absolute value of the parameter shift to su ratio given 0.056

Additional refinement cycles may be required.

|                   |                                                  |                             |              |
|-------------------|--------------------------------------------------|-----------------------------|--------------|
| PLAT041_ALERT_1_C | Calc. and Reported SumFormula                    | Strings Differ              | Please Check |
| PLAT042_ALERT_1_C | Calc. and Reported MoietyFormula                 | Strings Differ              | Please Check |
| PLAT043_ALERT_1_C | Calculated and Reported Mol. Weight              | Differ by ..                | 2.46 Check   |
| PLAT068_ALERT_1_C | Reported F000 Differs from Calcd (or Missing)... |                             | Please Check |
| PLAT077_ALERT_4_C | Unitcell Contains Non-integer Number of Atoms .. |                             | Please Check |
| PLAT080_ALERT_2_C | Maximum Shift/Error .....                        |                             | 0.06 Why ?   |
| PLAT213_ALERT_2_C | Atom C4_13                                       | has ADP max/min Ratio ..... | 3.4 prolat   |
| PLAT220_ALERT_2_C | NonSolvent Resd 1 C                              | Ueq(max)/Ueq(min) Range     | 3.5 Ratio    |
| PLAT220_ALERT_2_C | NonSolvent Resd 2 C                              | Ueq(max)/Ueq(min) Range     | 4.2 Ratio    |
| PLAT911_ALERT_3_C | Missing FCF Refl Between Thmin & STh/L=          | 0.600                       | 11 Report    |
| PLAT971_ALERT_2_C | Check Calcd Resid. Dens.                         | 0.65Ang From Pt_11          | 2.07 eA-3    |
| PLAT971_ALERT_2_C | Check Calcd Resid. Dens.                         | 0.60Ang From Pt_21          | 1.89 eA-3    |
| PLAT971_ALERT_2_C | Check Calcd Resid. Dens.                         | 1.04Ang From ClB_92         | 1.84 eA-3    |
| PLAT971_ALERT_2_C | Check Calcd Resid. Dens.                         | 0.53Ang From Pt_21          | 1.83 eA-3    |
| PLAT971_ALERT_2_C | Check Calcd Resid. Dens.                         | 0.55Ang From Pt_11          | 1.78 eA-3    |
| PLAT971_ALERT_2_C | Check Calcd Resid. Dens.                         | 0.93Ang From Pt_21          | 1.71 eA-3    |
| PLAT972_ALERT_2_C | Check Calcd Resid. Dens.                         | 0.58Ang From Pt_21          | -2.14 eA-3   |
| PLAT972_ALERT_2_C | Check Calcd Resid. Dens.                         | 0.68Ang From Pt_21          | -1.62 eA-3   |
| PLAT972_ALERT_2_C | Check Calcd Resid. Dens.                         | 0.67Ang From Pt_11          | -1.60 eA-3   |
| PLAT972_ALERT_2_C | Check Calcd Resid. Dens.                         | 0.50Ang From Pt_11          | -1.53 eA-3   |
| PLAT972_ALERT_2_C | Check Calcd Resid. Dens.                         | 0.86Ang From Pt_11          | -1.52 eA-3   |
| PLAT972_ALERT_2_C | Check Calcd Resid. Dens.                         | 0.60Ang From Pt_11          | -1.51 eA-3   |

---

### ● Alert level G

FORMU01\_ALERT\_1\_G There is a discrepancy between the atom counts in the

\_chemical\_formula\_sum and \_chemical\_formula\_moiety. This is usually due to the moiety formula being in the wrong format.

Atom count from \_chemical\_formula\_sum: C53.25 H48.75 Cl0.5 O4.25 P2

Atom count from \_chemical\_formula\_moiety:C53.25 H49 Cl0.5 O4.25 P2 Pt1

FORMU01\_ALERT\_2\_G There is a discrepancy between the atom counts in the

\_chemical\_formula\_sum and the formula from the \_atom\_site\* data.

Atom count from \_chemical\_formula\_sum:C53.25 H48.75 Cl0.5 O4.25 P2 Pt1

Atom count from the \_atom\_site data: C53.37450 H49.34899 Cl0.349 O4.3

ABSMU01\_ALERT\_1\_G Calculation of \_exptl\_absorpt\_correction\_mu

not performed for this radiation type.

CELLZ01\_ALERT\_1\_G Difference between formula and atom\_site contents detected.

CELLZ01\_ALERT\_1\_G ALERT: Large difference may be due to a

symmetry error - see SYMMG tests

From the CIF: \_cell\_formula\_units\_Z 4

From the CIF: \_chemical\_formula\_sum C53.25 H48.75 Cl0.50 O4.25 P2 Pt S

TEST: Compare cell contents of formula and atom\_site data

| atom | Z*formula | cif sites | diff  |
|------|-----------|-----------|-------|
| C    | 213.00    | 213.50    | -0.50 |
| H    | 195.00    | 197.40    | -2.40 |
| Cl   | 2.00      | 1.40      | 0.60  |

|                   |                                                  |               |          |               |
|-------------------|--------------------------------------------------|---------------|----------|---------------|
| O                 | 17.00                                            | 17.20         | -0.20    |               |
| P                 | 8.00                                             | 8.00          | 0.00     |               |
| Pt                | 4.00                                             | 4.00          | 0.00     |               |
| S                 | 8.00                                             | 8.00          | 0.00     |               |
| PLAT002_ALERT_2_G | Number of Distance or Angle Restraints on AtSite |               |          | 11 Note       |
| PLAT003_ALERT_2_G | Number of Uiso or Uij Restrained non-H Atoms ... |               |          | 11 Report     |
| PLAT083_ALERT_2_G | SHELXL Second Parameter in WGHT Unusually Large  |               |          | 6.10 Why ?    |
| PLAT092_ALERT_4_G | Check: Wavelength Given is not Cu,Ga,Mo,Ag,In Ka |               |          | 0.62000 Ang.  |
| PLAT154_ALERT_1_G | The s.u.'s on the Cell Angles are Equal ..(Note) |               |          | 0.03 Degree   |
| PLAT172_ALERT_4_G | The CIF-Embedded .res File Contains DFIX Records |               |          | 3 Report      |
| PLAT173_ALERT_4_G | The CIF-Embedded .res File Contains DANG Records |               |          | 3 Report      |
| PLAT175_ALERT_4_G | The CIF-Embedded .res File Contains SAME Records |               |          | 1 Report      |
| PLAT176_ALERT_4_G | The CIF-Embedded .res File Contains SADI Records |               |          | 2 Report      |
| PLAT178_ALERT_4_G | The CIF-Embedded .res File Contains SIMU Records |               |          | 1 Report      |
| PLAT188_ALERT_3_G | A Non-default SIMU Restraint Value has been used |               |          | 0.0100 Report |
| PLAT232_ALERT_2_G | Hirshfeld Test Diff (M-X)                        | Pt_21         | --Pa_24  | 12.6 s.u.     |
| PLAT232_ALERT_2_G | Hirshfeld Test Diff (M-X)                        | Pt_11         | --P_13   | 6.4 s.u.      |
| PLAT301_ALERT_3_G | Main Residue Disorder .....                      | (Resd 1)      |          | 31% Note      |
| PLAT301_ALERT_3_G | Main Residue Disorder .....                      | (Resd 2)      |          | 10% Note      |
| PLAT302_ALERT_4_G | Anion/Solvent/Minor-Residue Disorder             | (Resd 3)      |          | 100% Note     |
| PLAT302_ALERT_4_G | Anion/Solvent/Minor-Residue Disorder             | (Resd 4)      |          | 100% Note     |
| PLAT302_ALERT_4_G | Anion/Solvent/Minor-Residue Disorder             | (Resd 5)      |          | 100% Note     |
| PLAT304_ALERT_4_G | Non-Integer Number of Atoms in .....             | (Resd 4)      |          | 1.03 Check    |
| PLAT304_ALERT_4_G | Non-Integer Number of Atoms in .....             | (Resd 5)      |          | 0.72 Check    |
| PLAT413_ALERT_2_G | Short Inter XH3 .. XHn                           | H1A_91        | ..H4_14  | 2.10 Ang.     |
|                   |                                                  | 2-x,1-y,1-z = |          | 2_766 Check   |
| PLAT413_ALERT_2_G | Short Inter XH3 .. XHn                           | H4A3_91       | ..H4_22  | 2.04 Ang.     |
|                   |                                                  | x,y,z =       |          | 1_555 Check   |
| PLAT432_ALERT_2_G | Short Inter X...Y Contact                        | C5_12         | ..C1B_92 | 3.06 Ang.     |
|                   |                                                  | 1-x,1-y,1-z = |          | 2_666 Check   |
| PLAT432_ALERT_2_G | Short Inter X...Y Contact                        | C4_12         | ..C1B_92 | 3.16 Ang.     |
|                   |                                                  | 1-x,1-y,1-z = |          | 2_666 Check   |
| PLAT720_ALERT_4_G | Number of Unusual/Non-Standard Labels .....      |               |          | 284 Note      |
| PLAT789_ALERT_4_G | Atoms with Negative _atom_site_disorder_group #  |               |          | 10 Check      |
| PLAT822_ALERT_4_G | CIF-embedded .res Contains Negative PART Numbers |               |          | 2 Check       |
| PLAT860_ALERT_3_G | Number of Least-Squares Restraints .....         |               |          | 190 Note      |
| PLAT912_ALERT_4_G | Missing # of FCF Reflections Above STh/L= 0.600  |               |          | 4093 Note     |
| PLAT913_ALERT_3_G | Missing # of Very Strong Reflections in FCF .... |               |          | 2 Note        |
| PLAT933_ALERT_2_G | Number of HKL-OMIT Records in Embedded .res File |               |          | 4 Note        |
| PLAT965_ALERT_2_G | The SHELXL WEIGHT Optimisation has not Converged |               |          | Please Check  |
| PLAT978_ALERT_2_G | Number C-C Bonds with Positive Residual Density. |               |          | 0 Info        |

---

0 **ALERT level A** = Most likely a serious problem - resolve or explain  
 0 **ALERT level B** = A potentially serious problem, consider carefully  
 23 **ALERT level C** = Check. Ensure it is not caused by an omission or oversight  
 38 **ALERT level G** = General information/check it is not something unexpected

9 ALERT type 1 CIF construction/syntax error, inconsistent or missing data  
 30 ALERT type 2 Indicator that the structure model may be wrong or deficient  
 6 ALERT type 3 Indicator that the structure quality may be low  
 16 ALERT type 4 Improvement, methodology, query or suggestion  
 0 ALERT type 5 Informative message, check

---

It is advisable to attempt to resolve as many as possible of the alerts in all categories. Often the minor alerts point to easily fixed oversights, errors and omissions in your CIF or refinement strategy, so attention to these fine details can be worthwhile. In order to resolve some of the more serious problems it may be necessary to carry out additional measurements or structure refinements. However, the purpose of your study may justify the reported deviations and the more serious of these should normally be commented upon in the discussion or experimental section of a paper or in the "special\_details" fields of the CIF. checkCIF was carefully designed to identify outliers and unusual parameters, but every test has its limitations and alerts that are not important in a particular case may appear. Conversely, the absence of alerts does not guarantee there are no aspects of the results needing attention. It is up to the individual to critically assess their own results and, if necessary, seek expert advice.

### **Publication of your CIF in IUCr journals**

A basic structural check has been run on your CIF. These basic checks will be run on all CIFs submitted for publication in IUCr journals (*Acta Crystallographica*, *Journal of Applied Crystallography*, *Journal of Synchrotron Radiation*); however, if you intend to submit to *Acta Crystallographica Section C* or *E* or *IUCrData*, you should make sure that full publication checks are run on the final version of your CIF prior to submission.

### **Publication of your CIF in other journals**

Please refer to the *Notes for Authors* of the relevant journal for any special instructions relating to CIF submission.

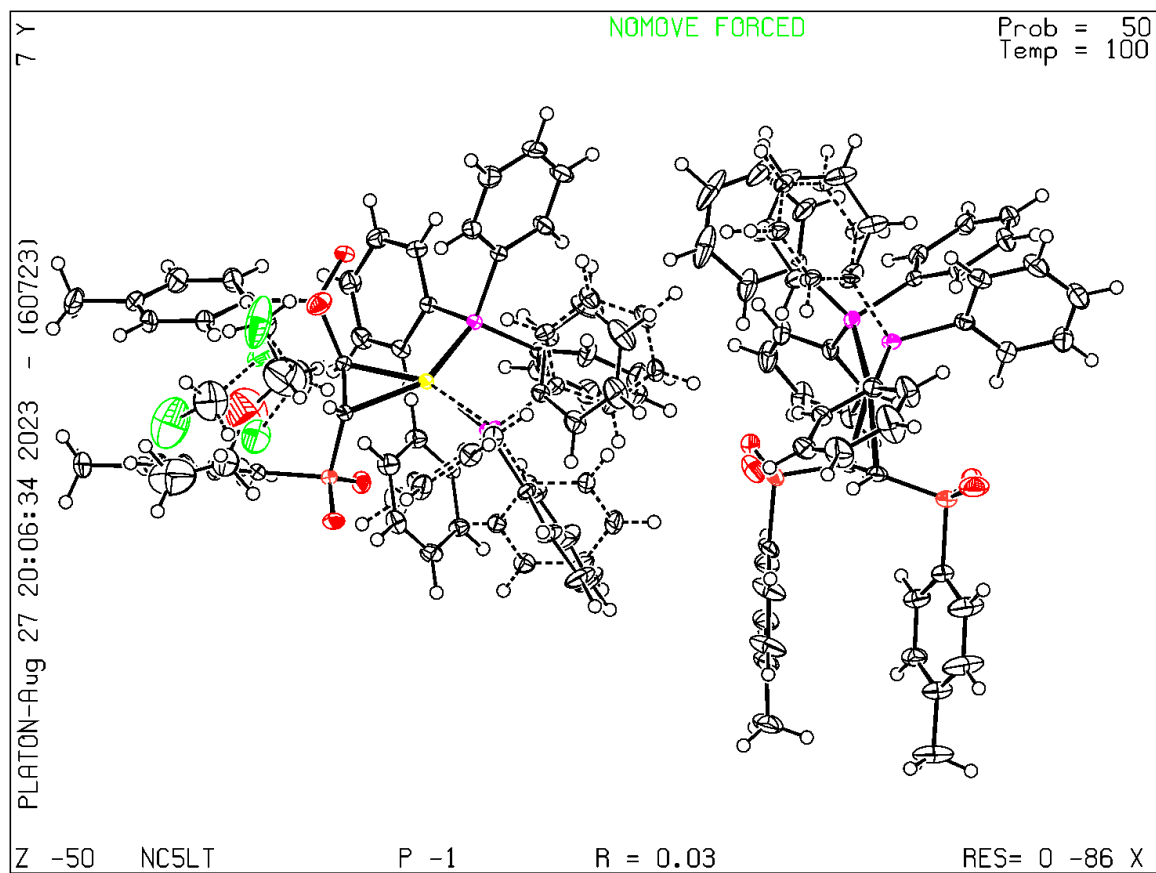

Supplement: s1 [file s1]
