# Supplementary material for: Platinum(0)-η2-1,2-(E)ditosylethene Complexes Bearing Phosphine, Isocyanide and N-Heterocyclic Carbene Ligands: Synthesis and Cytotoxicity towards Ovarian and Breast Cancer Cells
Source: MDPI journal article supplement (doi:10.3390/molecules29051119), 2024-03-01

# Platinum(0)- $\eta^2$ -1,2-(*E*)ditosylethene complexes bearing phosphine, isocyanide and *N*-heterocyclic carbene ligands: synthesis and cytotoxicity towards ovarian and breast cancer cells

Nicola Compagno<sup>1</sup>, Rachele Piccolo<sup>1</sup>, Enrica Bortolamiol<sup>1</sup>, Nicola Demitri<sup>2</sup>, Flavio Rizzolio<sup>1,3</sup>, Fabiano Visentin<sup>1\*</sup> and Thomas Scattolin<sup>4\*</sup>

<sup>1</sup> Department of Molecular Sciences and Nanosystems Università Ca' Foscari Campus Scientifico  
Via Torino 155, 30174, Venezia, Italy: nicola.compagno@unive.it (N.C.);

enrica.bortolamiol@unive.it (E.B.); flavio.rizzolio@unive.it (F.R.); fvise@unive.it (F.V.)

<sup>2</sup> Area Science Park Elettra-Sincrotrone Trieste, S.S. 14 Km 163.5 Basovizza, 34149, Trieste, Italy

<sup>3</sup> Pathology Unit, Department of Molecular Biology and Translational Research Centro di  
Riferimento Oncologico di Aviano (CRO) IRCCS via Franco Gallini 2, 33081, Aviano, Italy:  
flavio.rizzolio@unive.it (F.R.)

<sup>4</sup> Dipartimento di Scienze Chimiche, Università degli Studi di Padova, via Marzolo 1, 35131  
Padova, Italy: thomas.scattolin@unipd.it (T.S)

\* Correspondence: thomas.scattolin@unipd.it (T.S); fvise@unive.it (F.V.)

## Table of content

|                                                                |    |
|----------------------------------------------------------------|----|
| NMR and IR spectra .....                                       | 2  |
| X-ray diffraction analysis - Structural characterization ..... | 27 |

## NMR and IR spectra

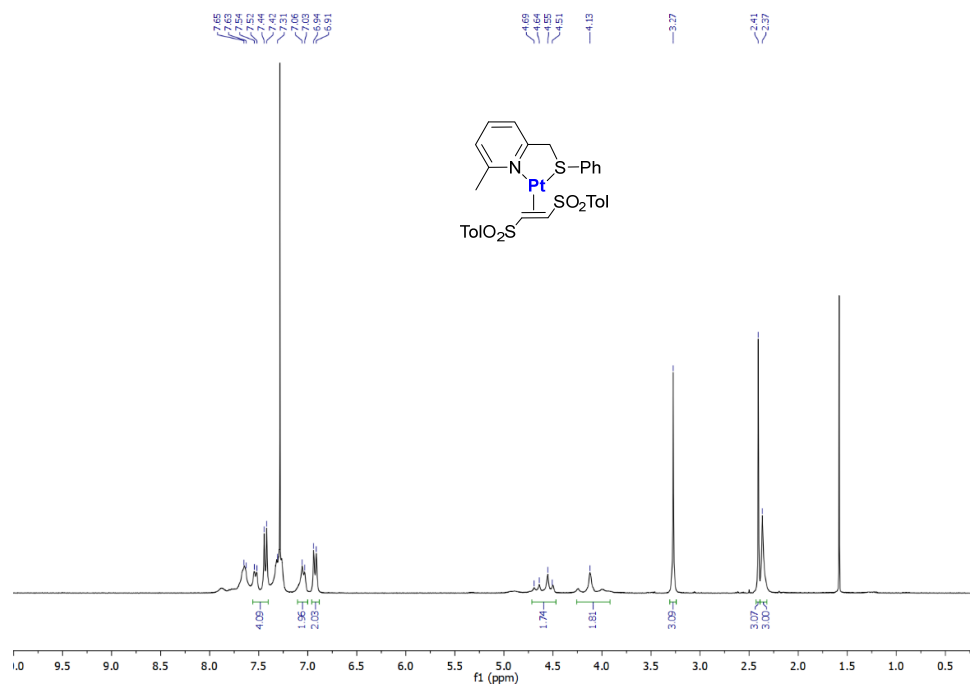

Figure S1. <sup>1</sup>H NMR spectrum of compound **1** in CDCl<sub>3</sub> at 298K

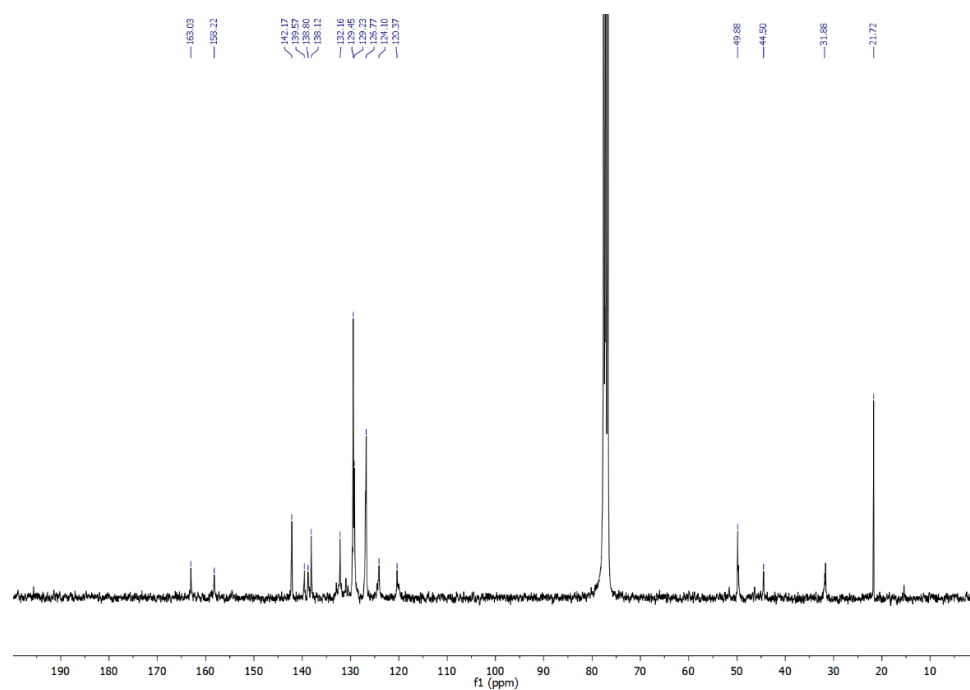

Figure S2. <sup>13</sup>C{<sup>1</sup>H} NMR spectrum of compound **1** in CDCl<sub>3</sub> at 298K

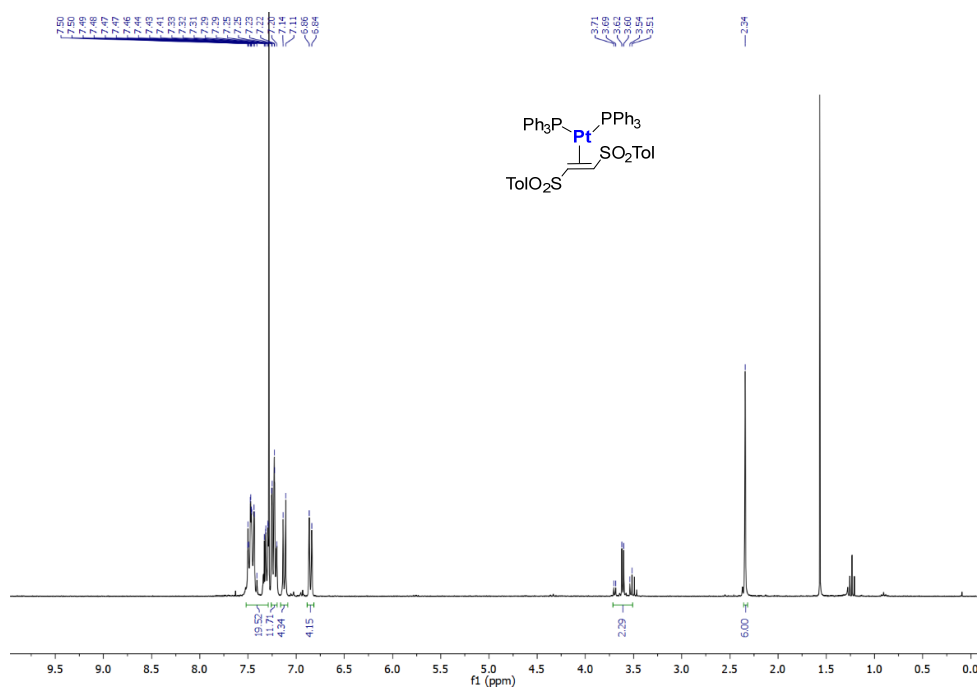

Figure S3. <sup>1</sup>H NMR spectrum of compound **2a** in CDCl<sub>3</sub> at 298K

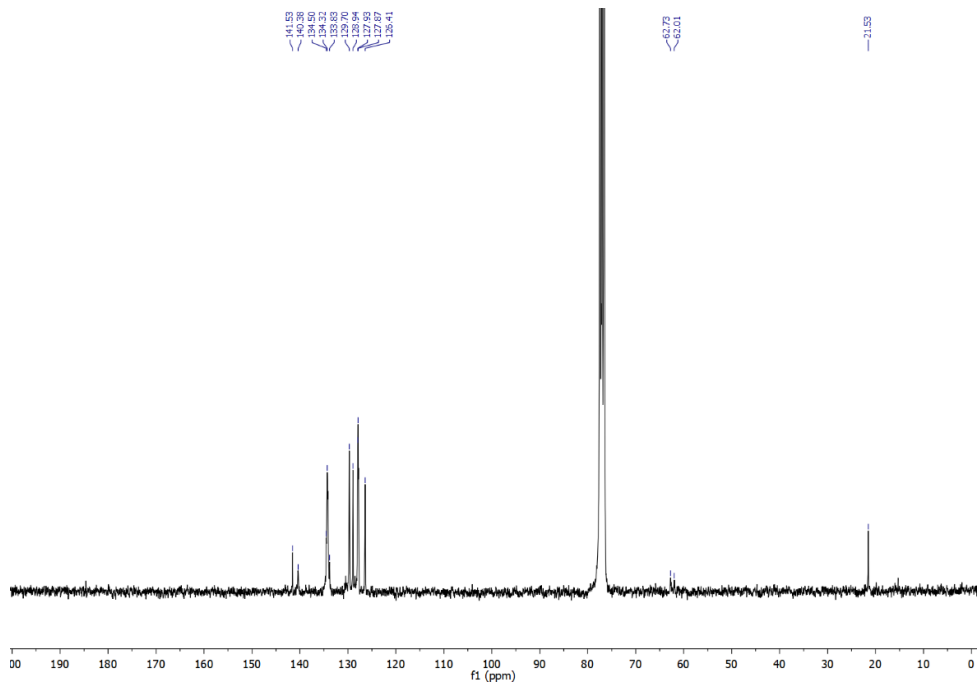

Figure S4. <sup>13</sup>C{<sup>1</sup>H} NMR spectrum of compound **2a** in CDCl<sub>3</sub> at 298K

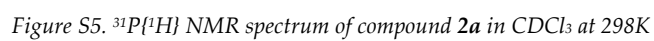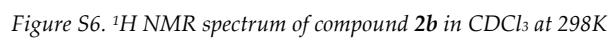

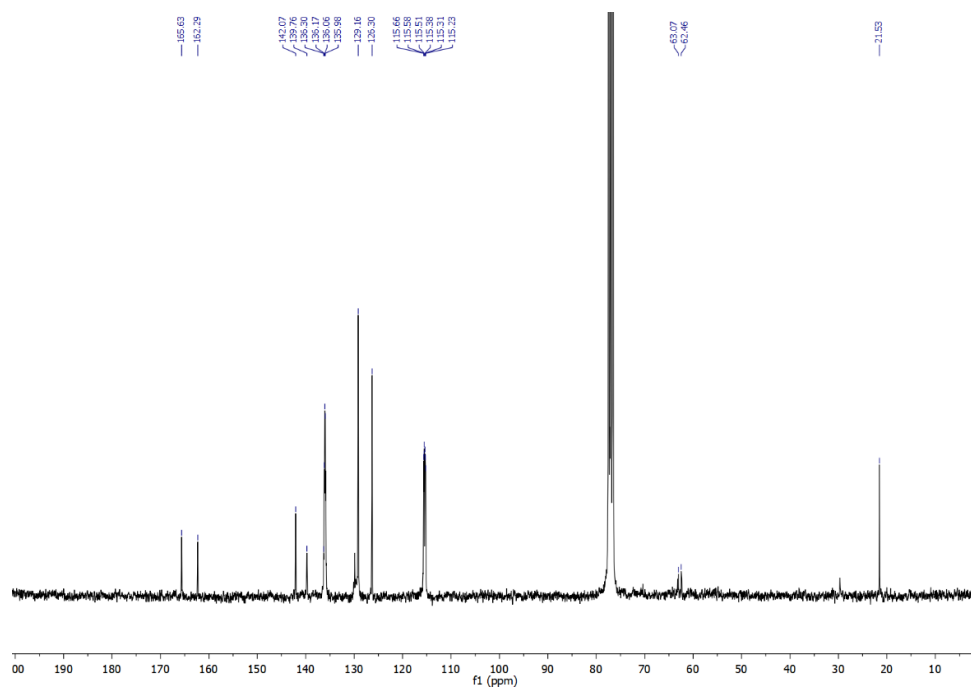

Figure S7.  $^{13}\text{C}\{^1\text{H}\}$  NMR spectrum of compound **2b** in  $\text{CDCl}_3$  at 298K

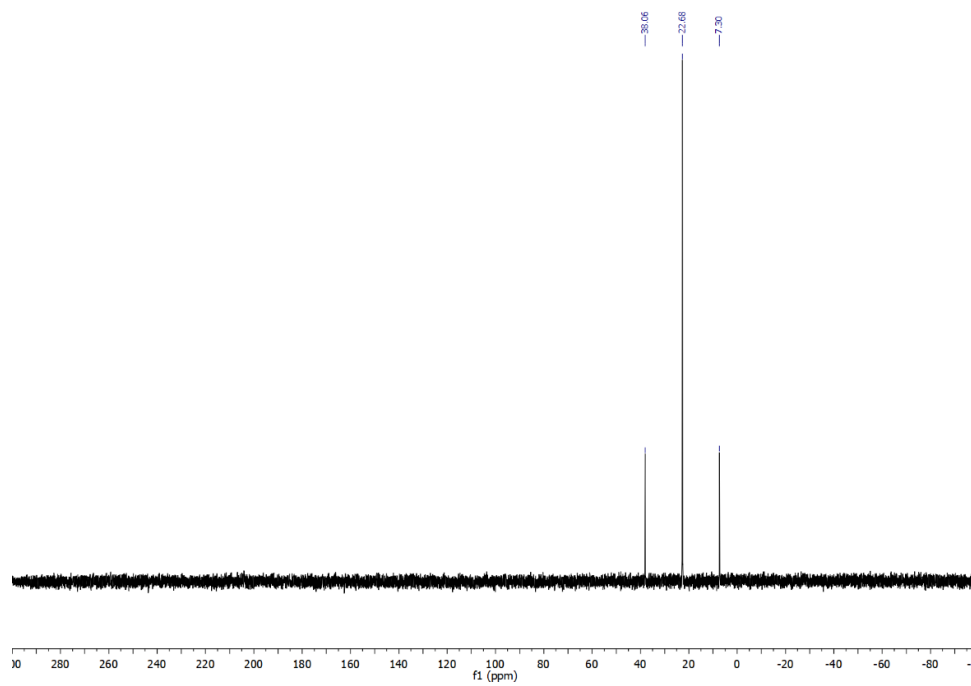

Figure S8.  $^{31}\text{P}\{^1\text{H}\}$  NMR spectrum of compound **2b** in  $\text{CDCl}_3$  at 298K

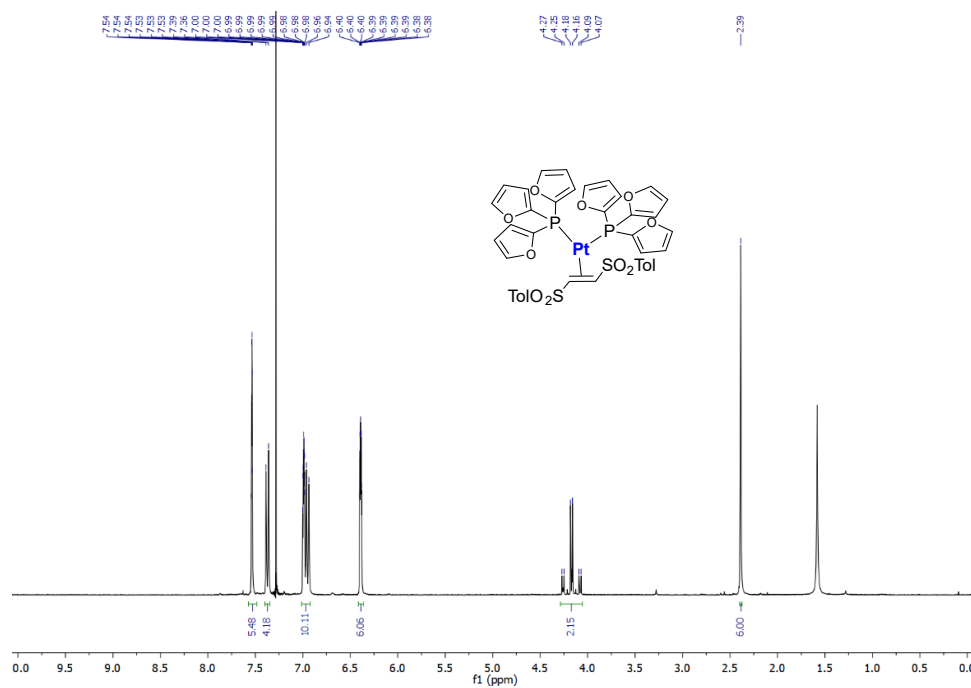

Figure S9. <sup>1</sup>H NMR spectrum of compound **2c** in CDCl<sub>3</sub> at 298K

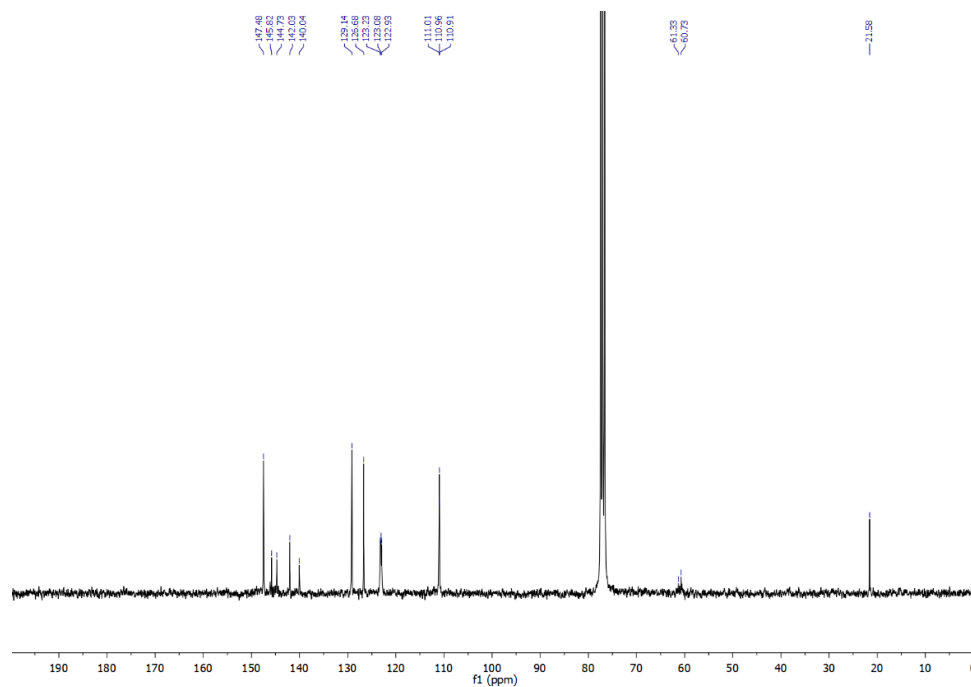

Figure S10. <sup>13</sup>C{<sup>1</sup>H} NMR spectrum of compound **2c** in CDCl<sub>3</sub> at 298K

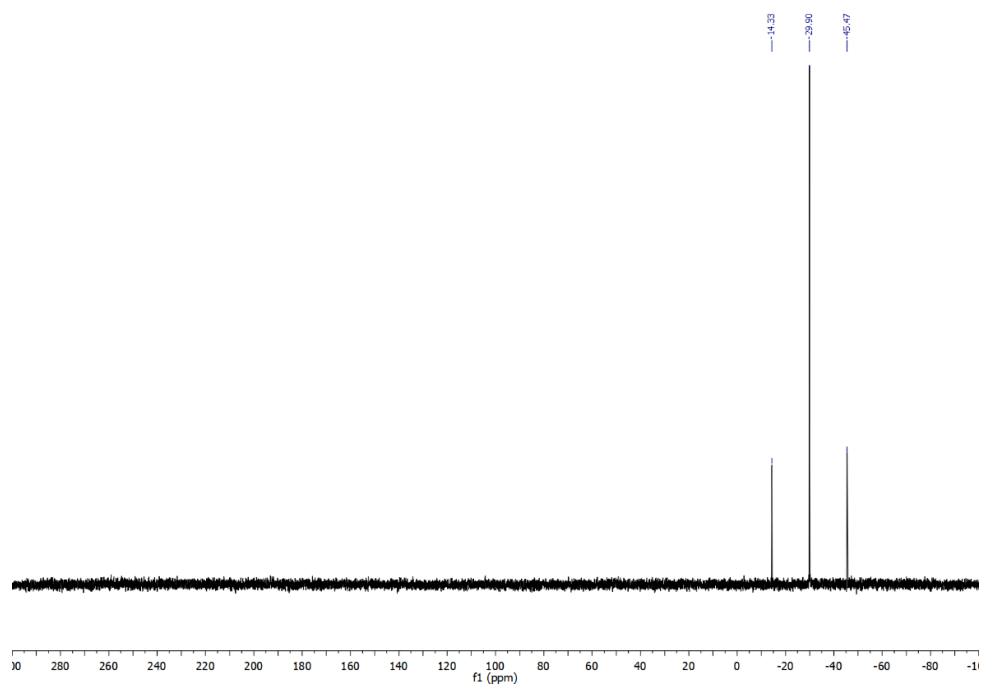

Figure S11.  $^{31}\text{P}\{^1\text{H}\}$  NMR spectrum of compound **2c** in  $\text{CDCl}_3$  at 298K

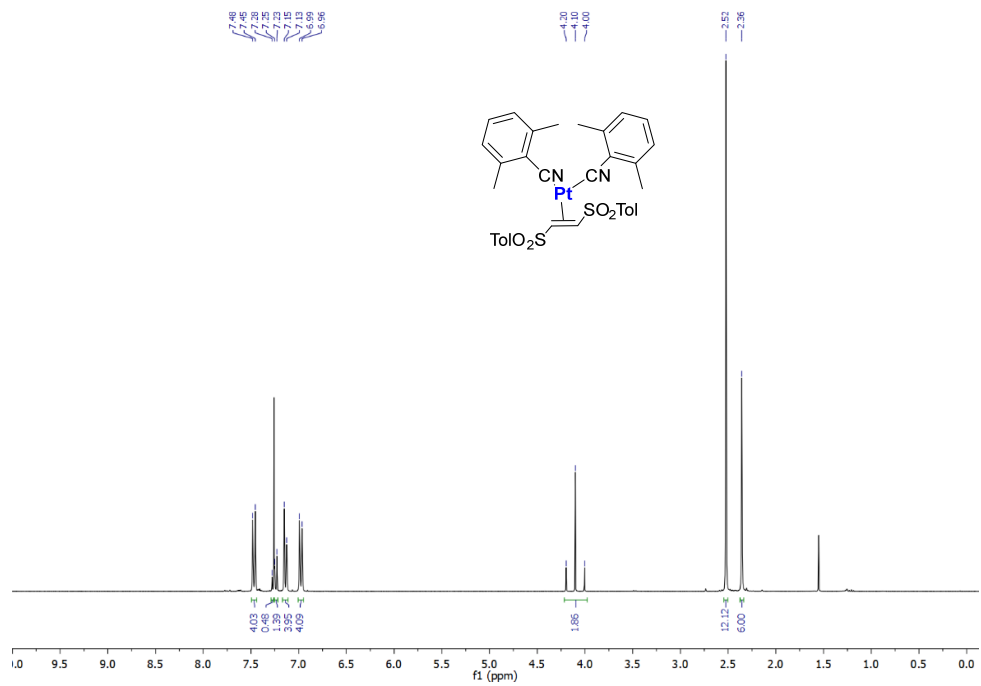

Figure S12.  $^1\text{H}$  NMR spectrum of compound **3a** in  $\text{CDCl}_3$  at 298K

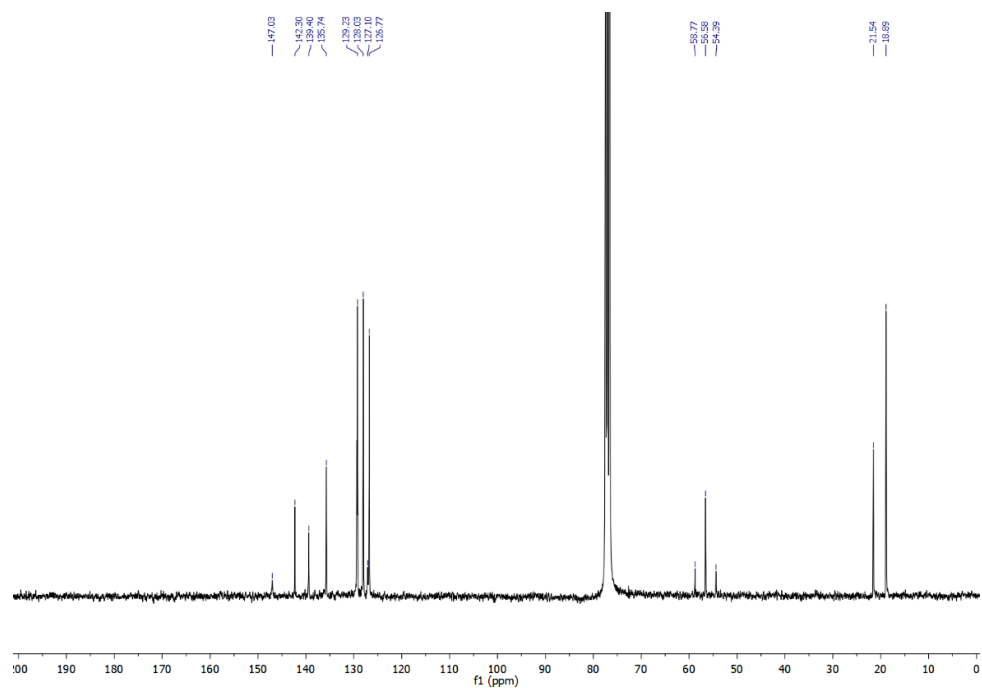

Figure S13.  $^{13}\text{C}\{^1\text{H}\}$  NMR spectrum of compound **3a** in  $\text{CDCl}_3$  at 298K

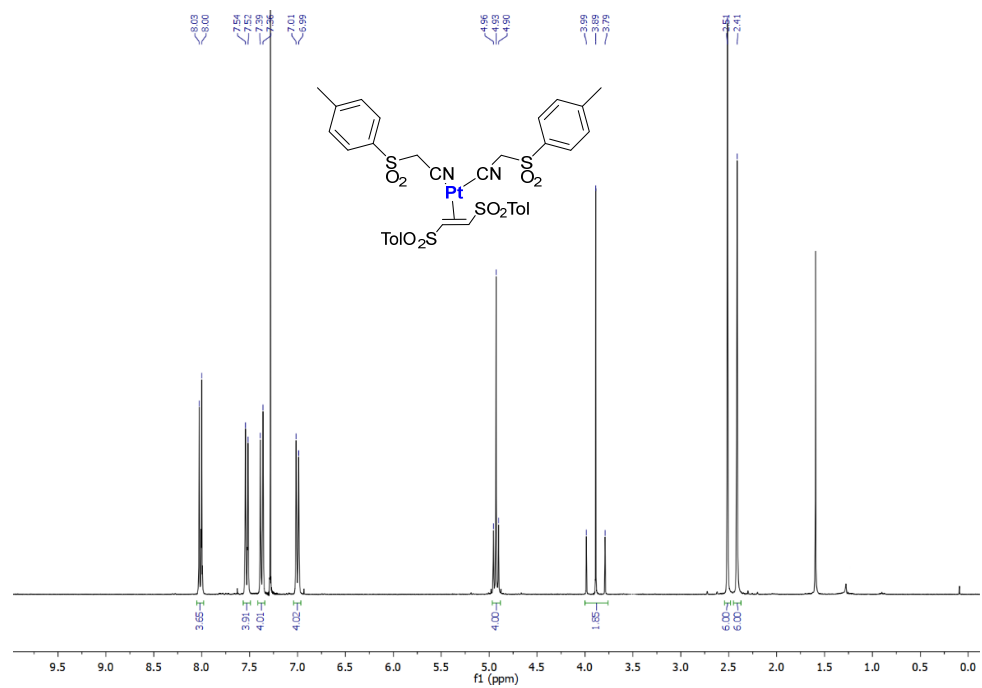

Figure S14.  $^1\text{H}$  NMR spectrum of compound **3b** in  $\text{CDCl}_3$  at 298K



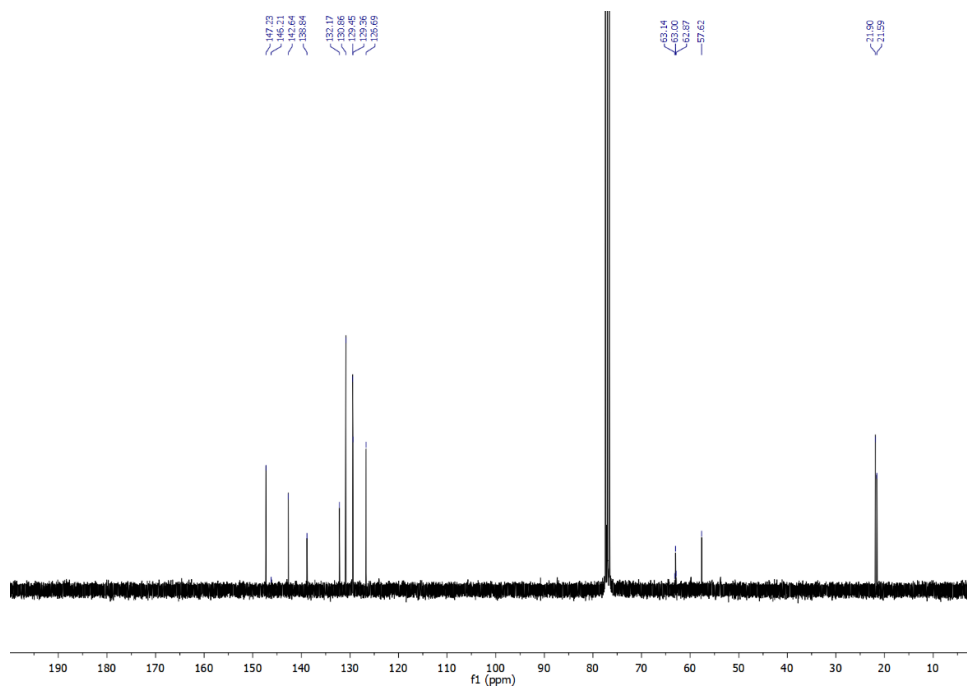

Figure S15.  $^{13}\text{C}\{^1\text{H}\}$  NMR spectrum of compound **3b** in  $\text{CDCl}_3$  at 298K

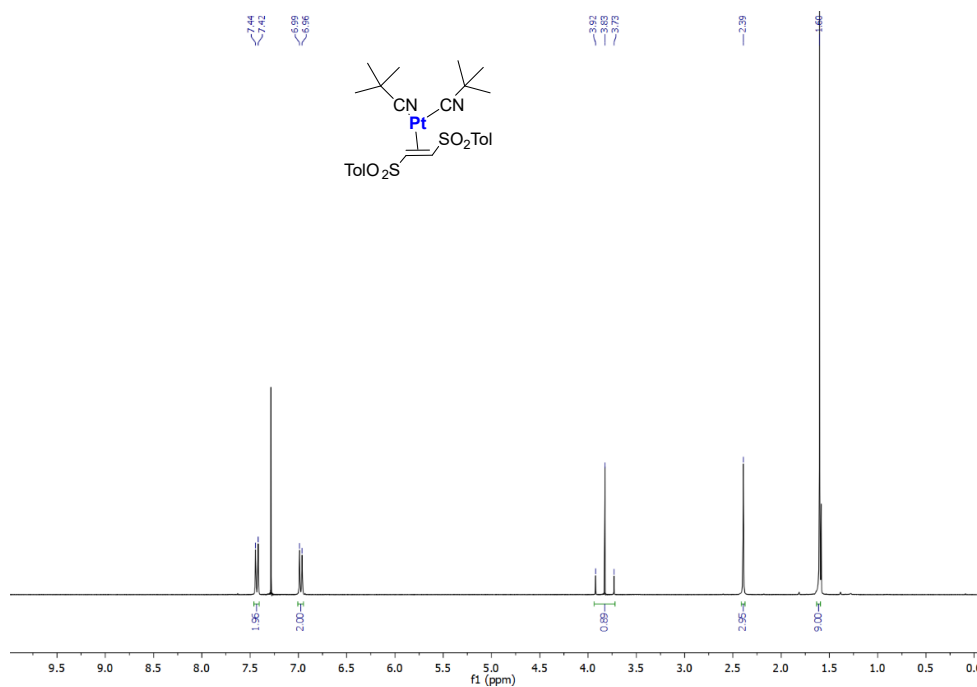

Figure S16.  $^1\text{H}$  NMR spectrum of compound **3c** in  $\text{CDCl}_3$  at 298K

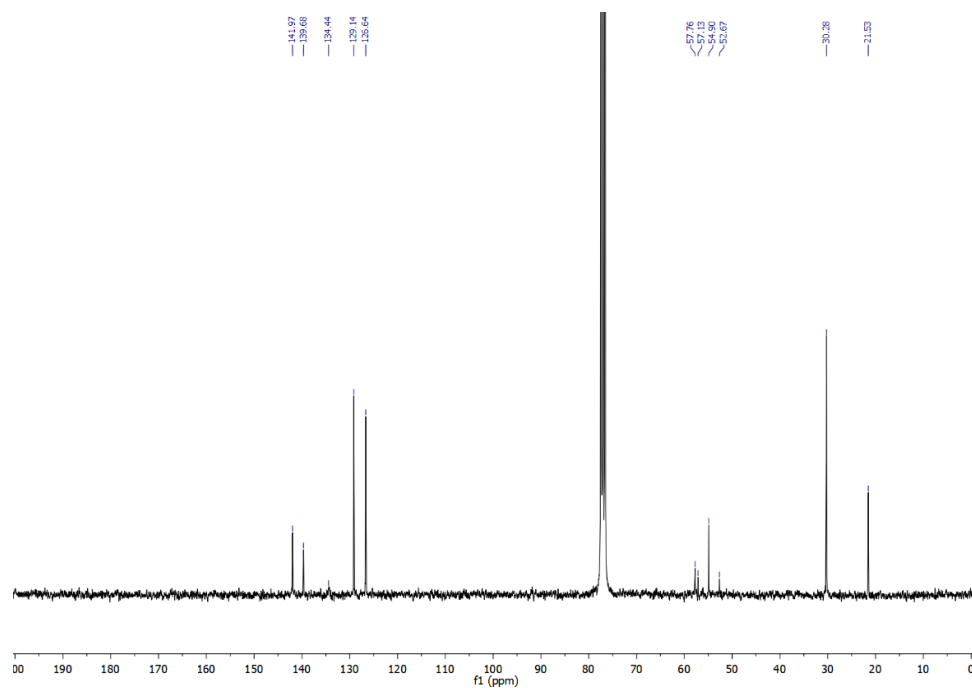

Figure S17. <sup>13</sup>C(<sup>1</sup>H) NMR spectrum of compound **3c** in CDCl<sub>3</sub> at 298K

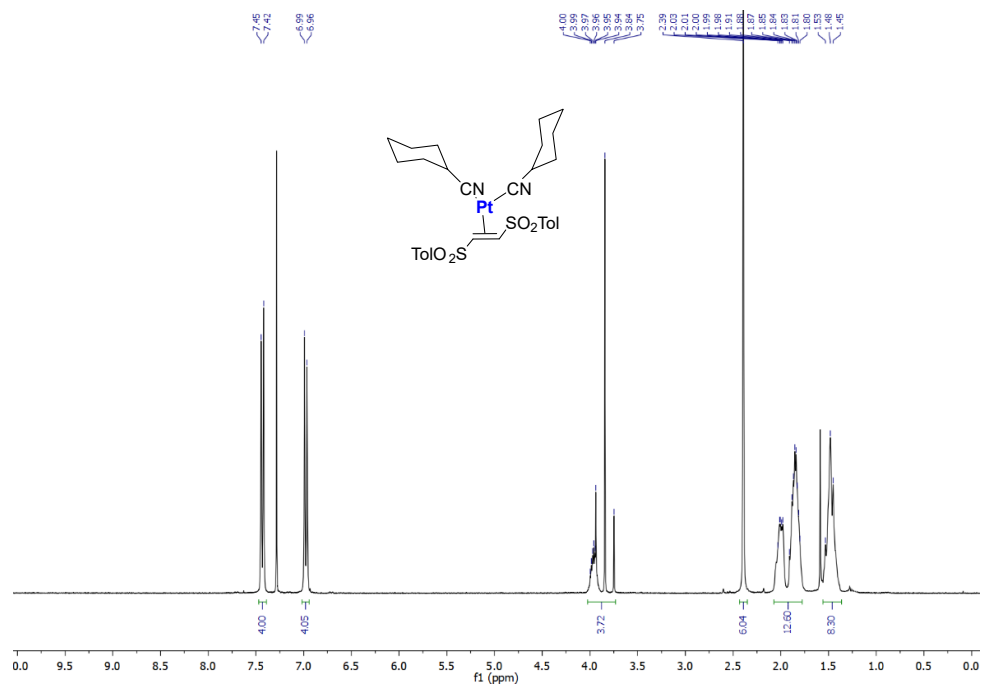

Figure S18. <sup>1</sup>H NMR spectrum of compound **3d** in CDCl<sub>3</sub> at 298K

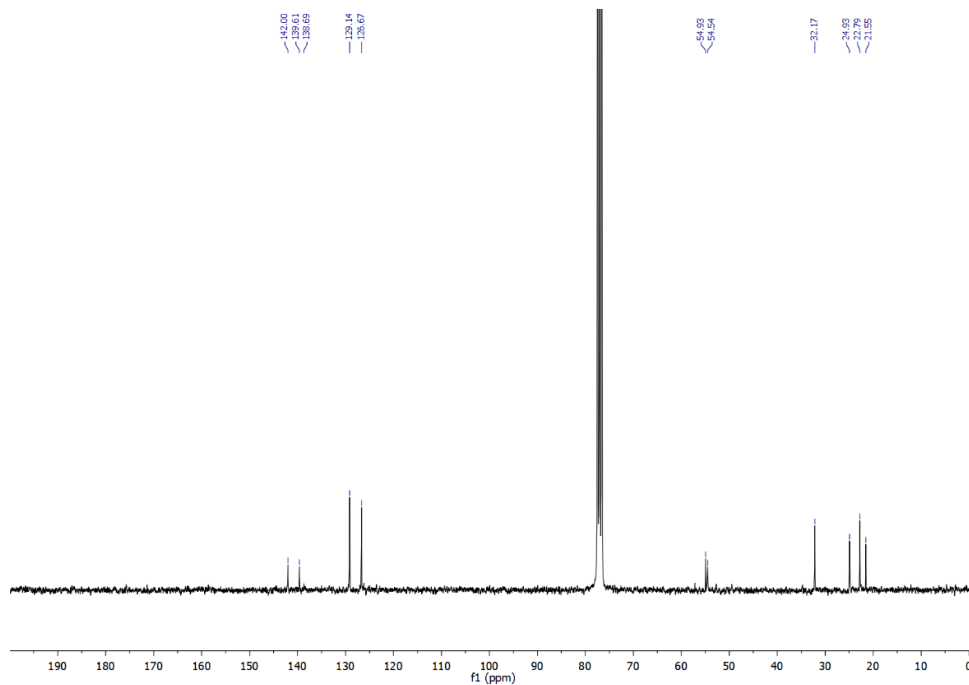

Figure S19.  $^{13}\text{C}\{^1\text{H}\}$  NMR spectrum of compound **3d** in  $\text{CDCl}_3$  at 298K

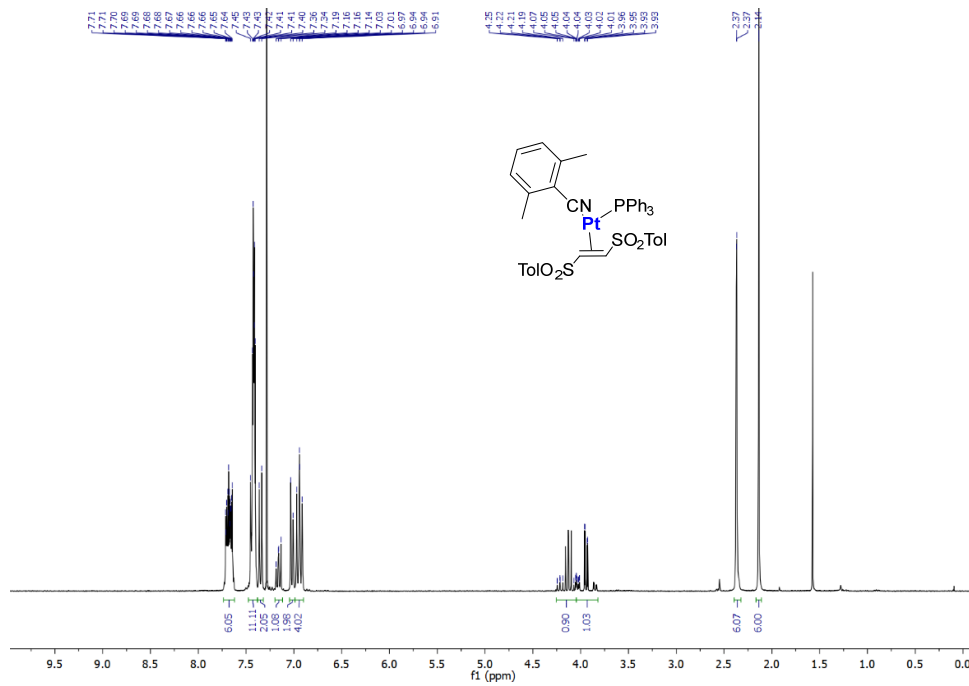

Figure S20.  $^1\text{H}$  NMR spectrum of compound **4a** in  $\text{CDCl}_3$  at 298K

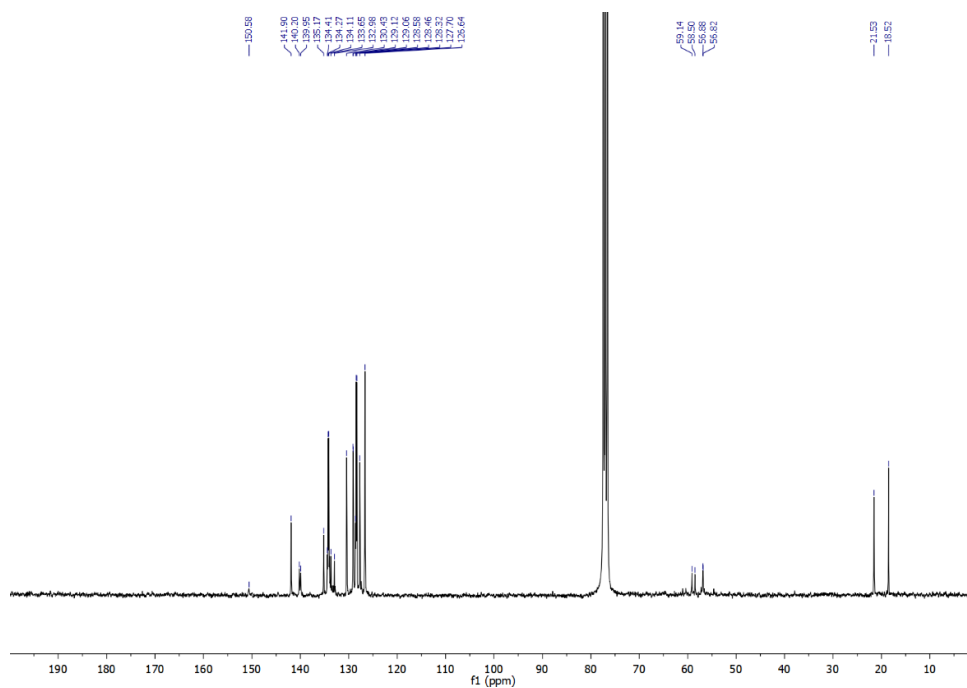

Figure S21.  $^{13}\text{C}\{^1\text{H}\}$  NMR spectrum of compound **4a** in  $\text{CDCl}_3$  at 298K

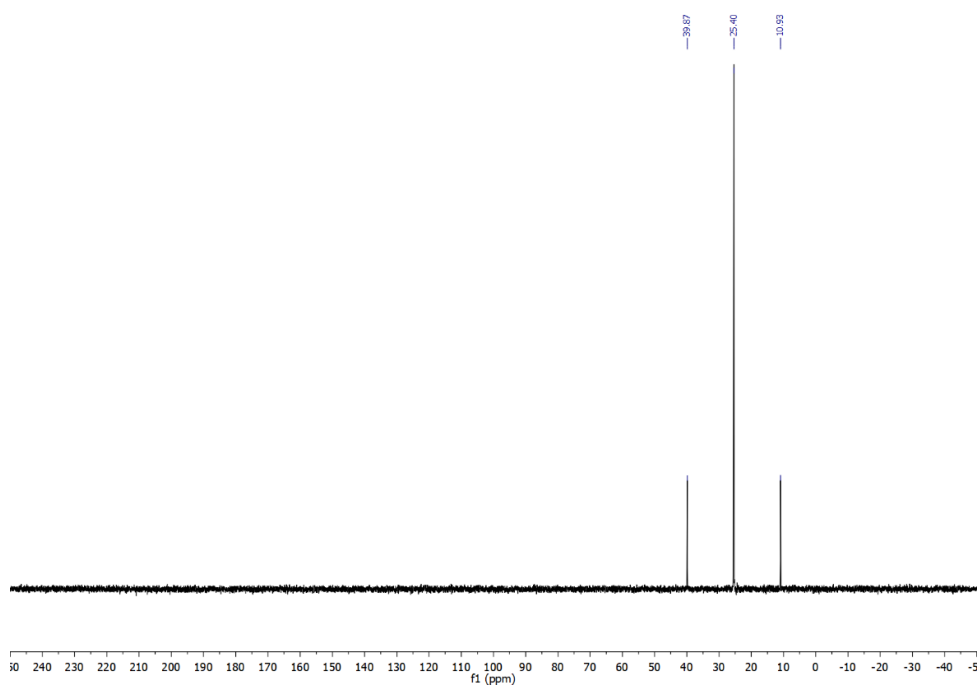

Figure S22.  $^{31}\text{P}\{^1\text{H}\}$  NMR spectrum of compound **4a** in  $\text{CDCl}_3$  at 298K

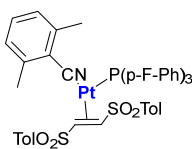[illegible]

Figure S24.  $^{13}\text{C}\{^1\text{H}\}$  NMR spectrum of compound **4b** in  $\text{CDCl}_3$  at 298K

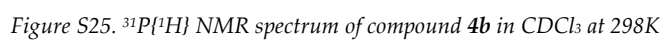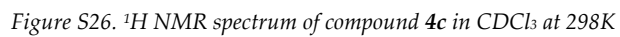

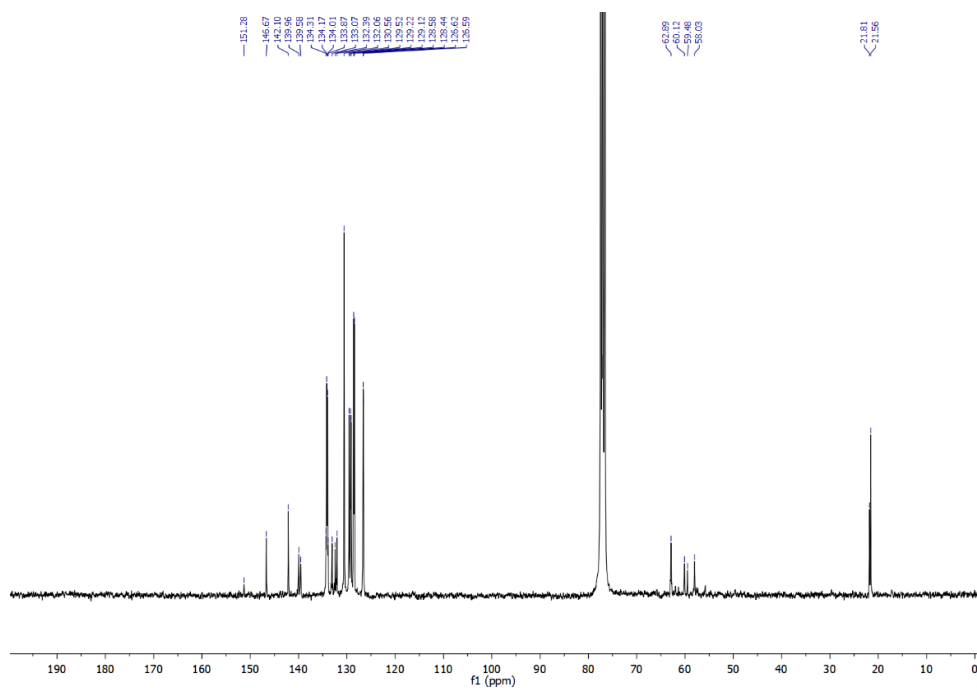

Figure S27.  $^{13}\text{C}\{^1\text{H}\}$  NMR spectrum of compound **4c** in  $\text{CDCl}_3$  at 298K

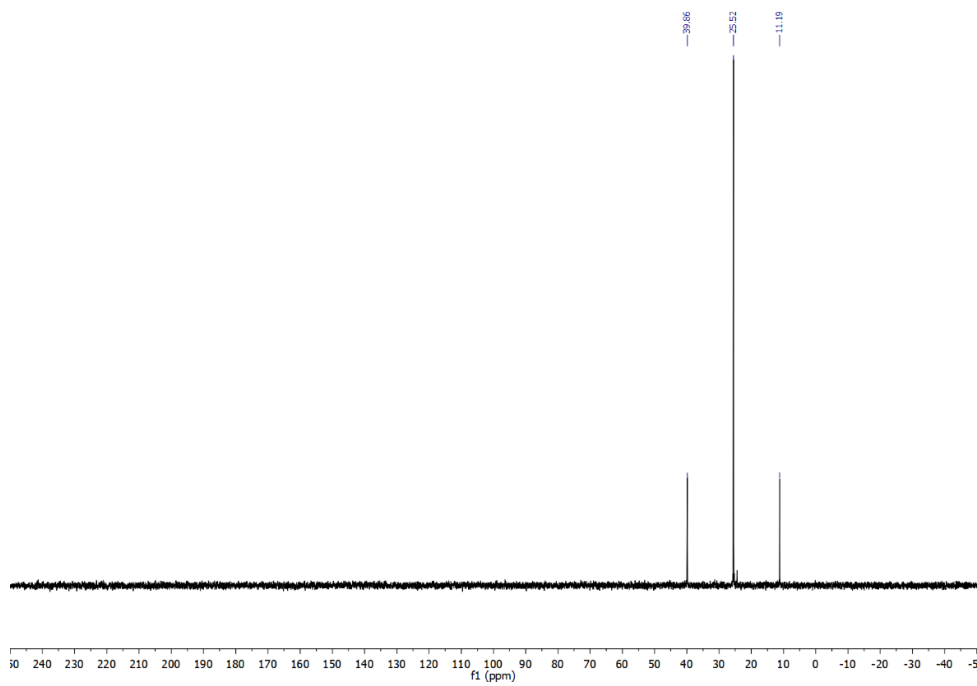

Figure S28.  $^{31}\text{P}\{^1\text{H}\}$  NMR spectrum of compound **4c** in  $\text{CDCl}_3$  at 298K

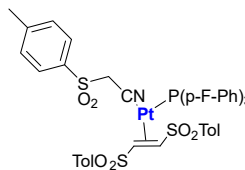

166.03  
162.69  
150.79  
148.86  
142.28  
139.35  
138.45  
137.72  
132.72  
130.61  
129.25  
128.82  
128.07  
125.89  
123.46  
116.10  
115.98  
115.02  
69.01  
66.65  
62.03  
56.30  
21.84  
21.56  
21.59

Figure S30.  $^{13}\text{C}\{^1\text{H}\}$  NMR spectrum of compound **4d** in  $\text{CDCl}_3$  at 298K



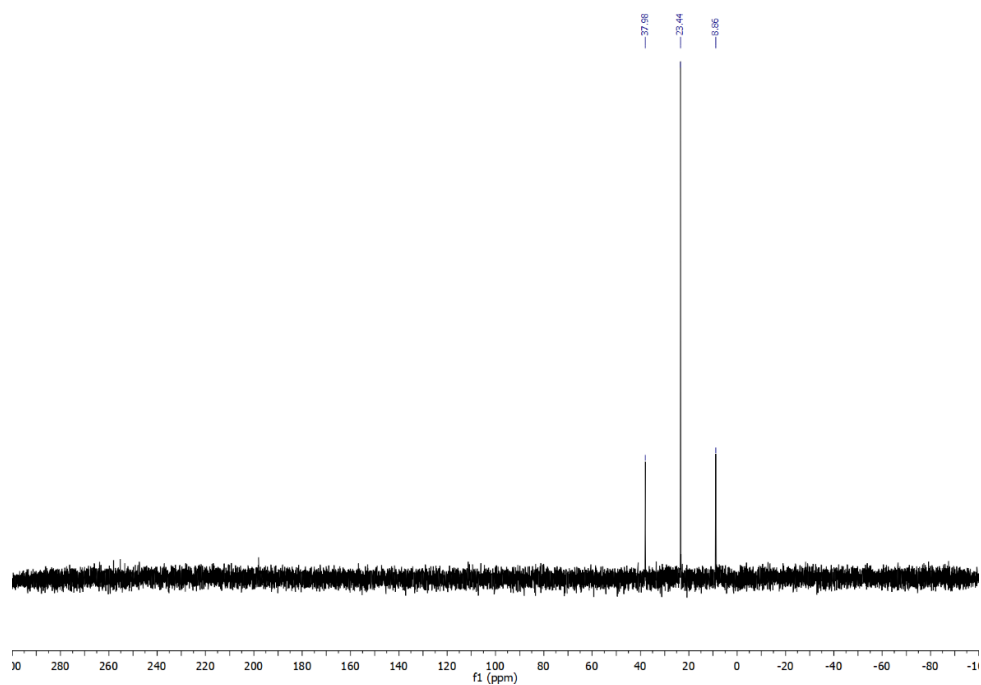

Figure S31.  $^{31}\text{P}\{^1\text{H}\}$  NMR spectrum of compound **4d** in  $\text{CDCl}_3$  at 298K

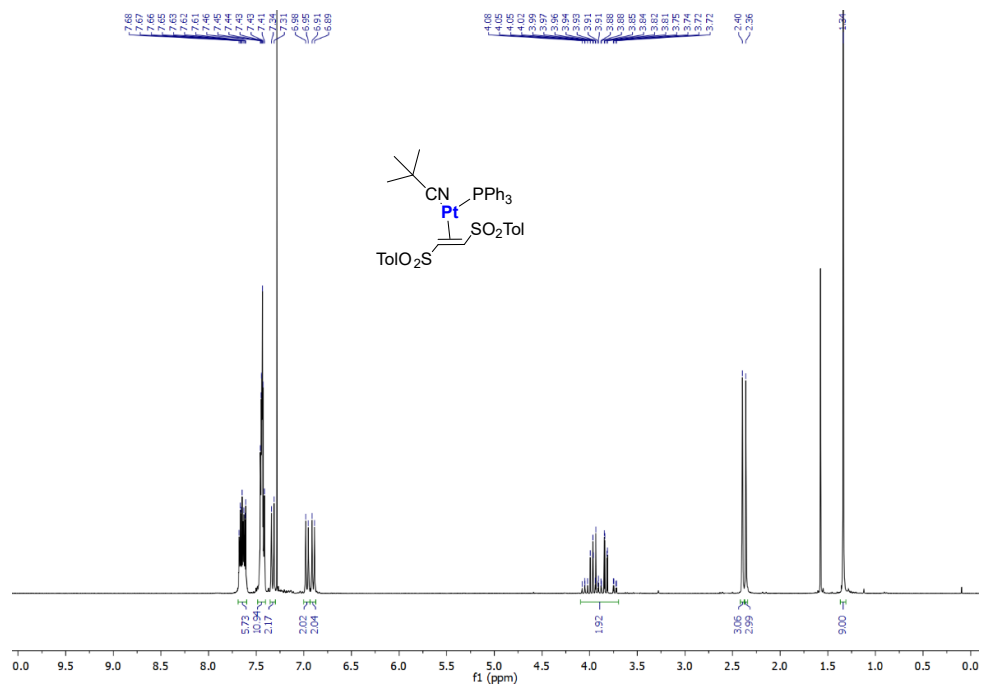

Figure S32.  $^1\text{H}$  NMR spectrum of compound **4e** in  $\text{CDCl}_3$  at 298K

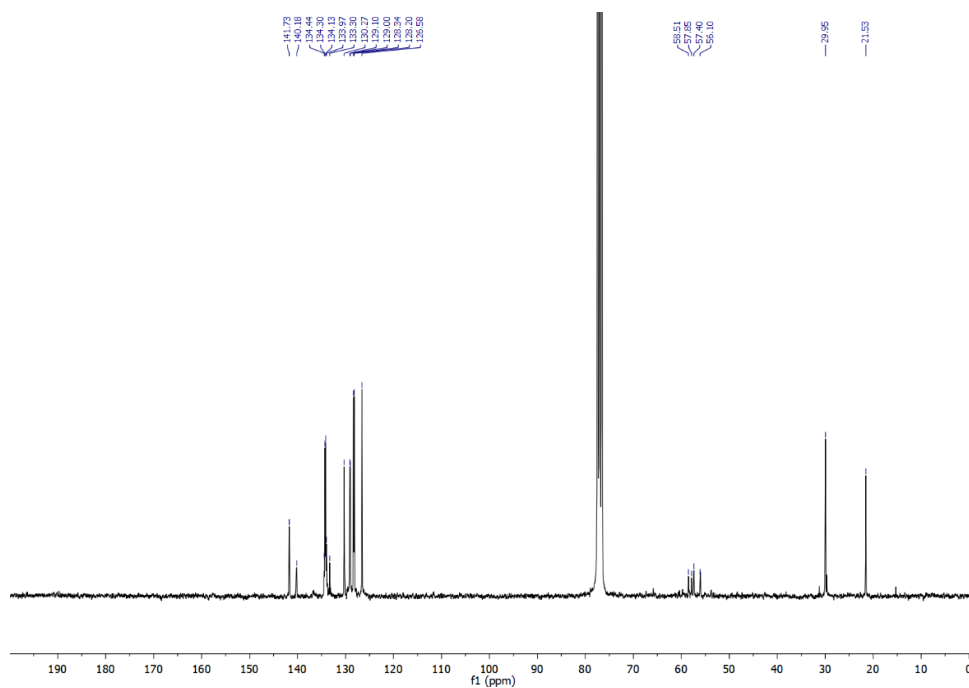

Figure S33.  $^{13}\text{C}\{^1\text{H}\}$  NMR spectrum of compound **4e** in  $\text{CDCl}_3$  at 298K

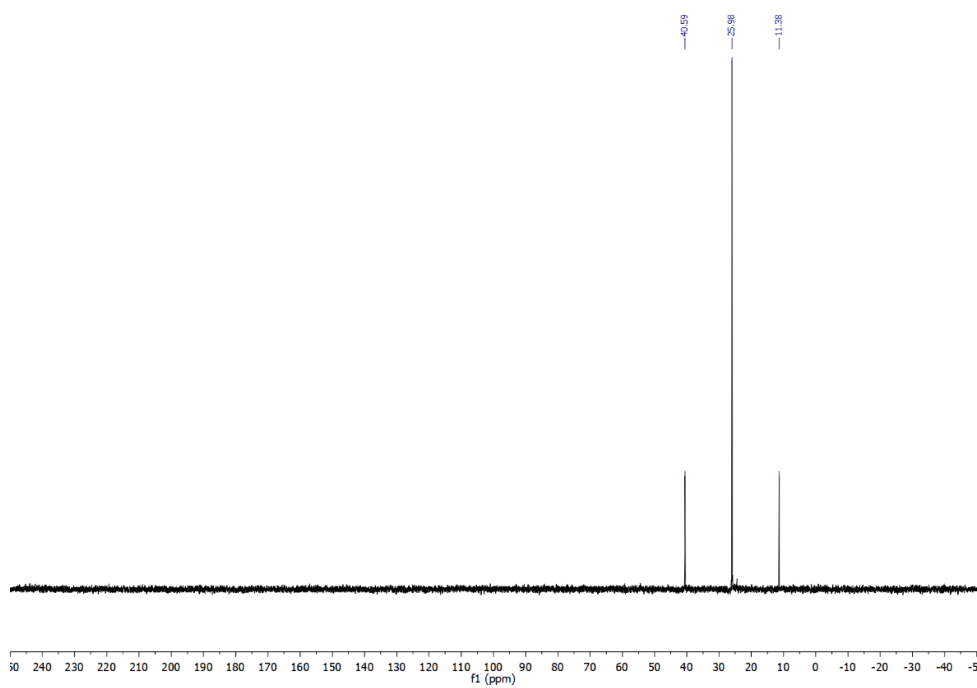

Figure S34.  $^{31}\text{P}\{^1\text{H}\}$  NMR spectrum of compound **4e** in  $\text{CDCl}_3$  at 298K

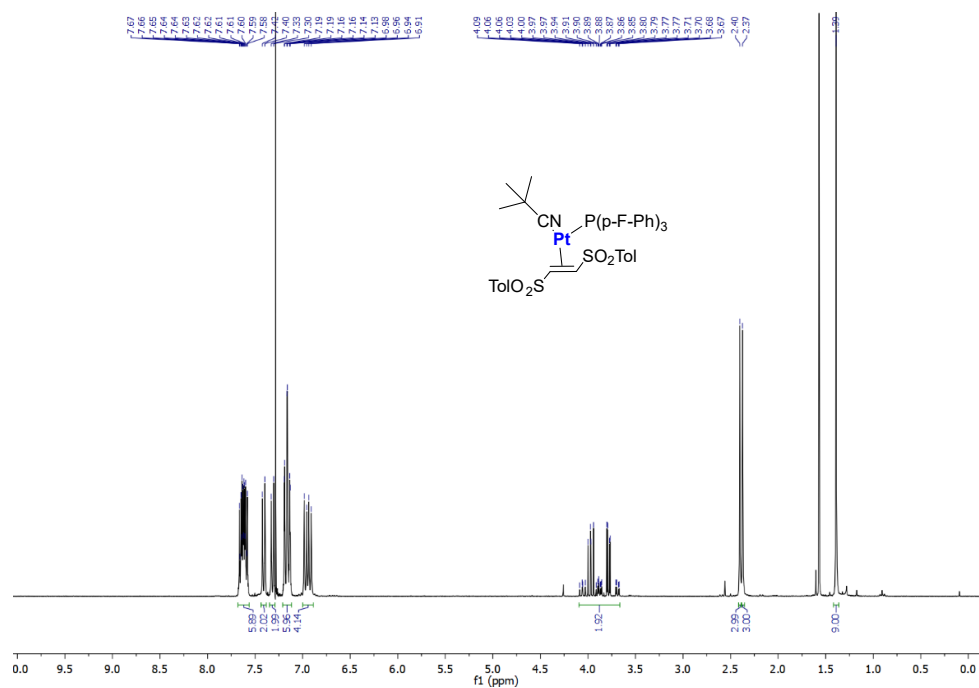

Figure S35. <sup>1</sup>H NMR spectrum of compound **4f** in CDCl<sub>3</sub> at 298K

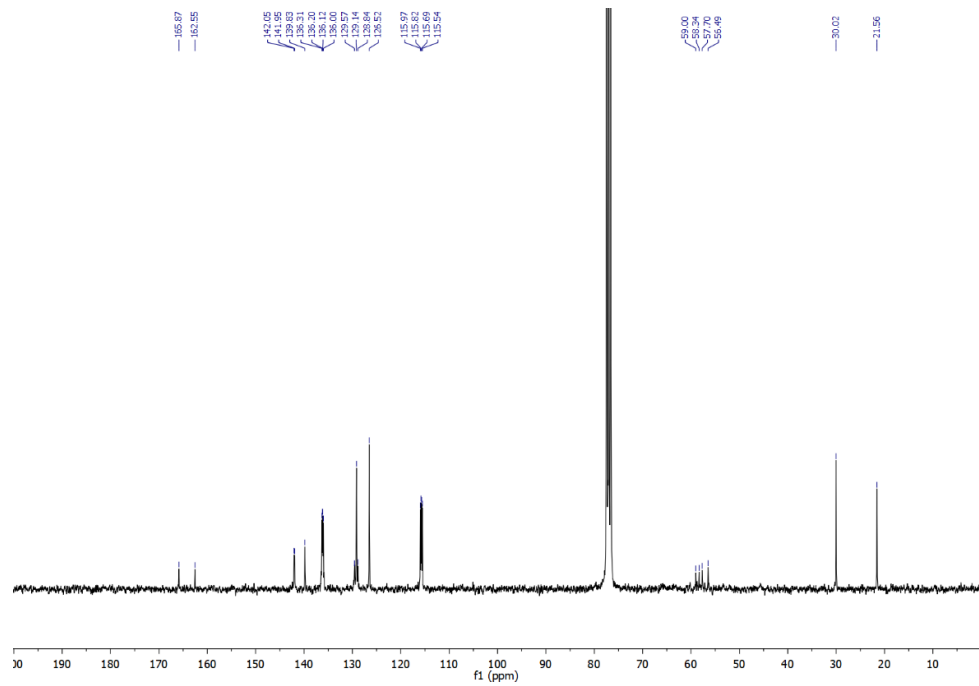

Figure S36. <sup>13</sup>C[<sup>1</sup>H] NMR spectrum of compound **4f** in CDCl<sub>3</sub> at 298K

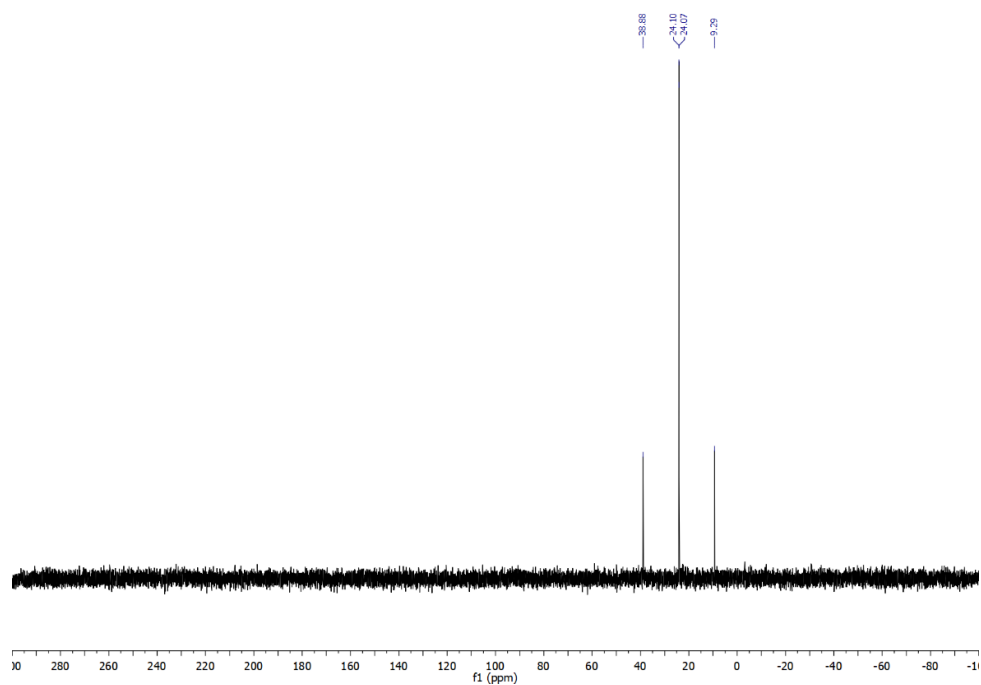

Figure S37.  $^{31}\text{P}\{^1\text{H}\}$  NMR spectrum of compound **4f** in  $\text{CDCl}_3$  at 298K

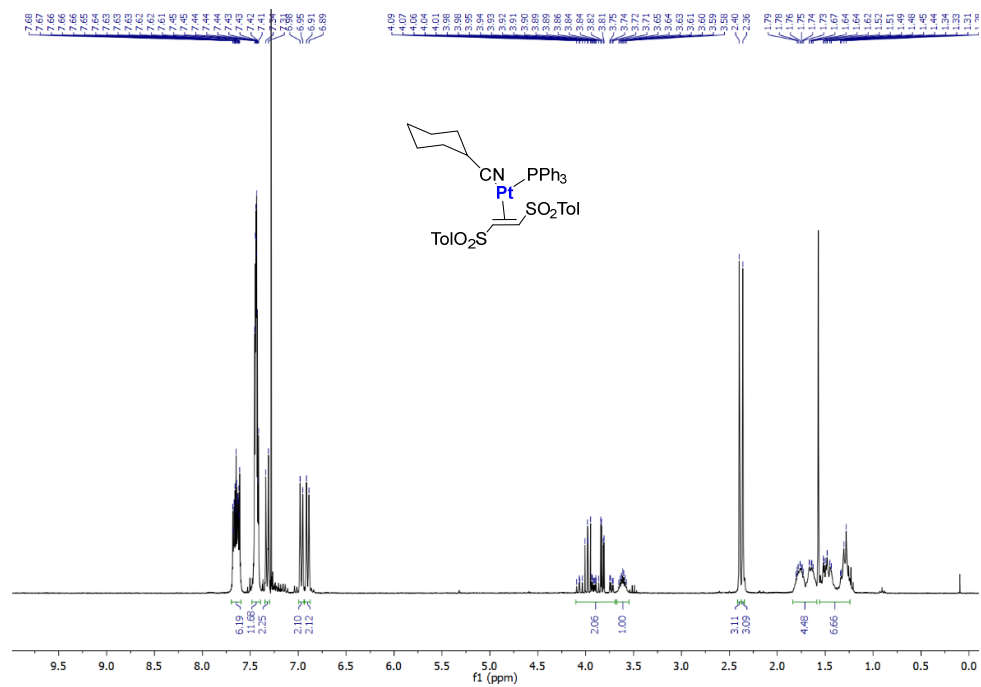

Figure S38.  $^1\text{H}$  NMR spectrum of compound **4g** in  $\text{CDCl}_3$  at 298K

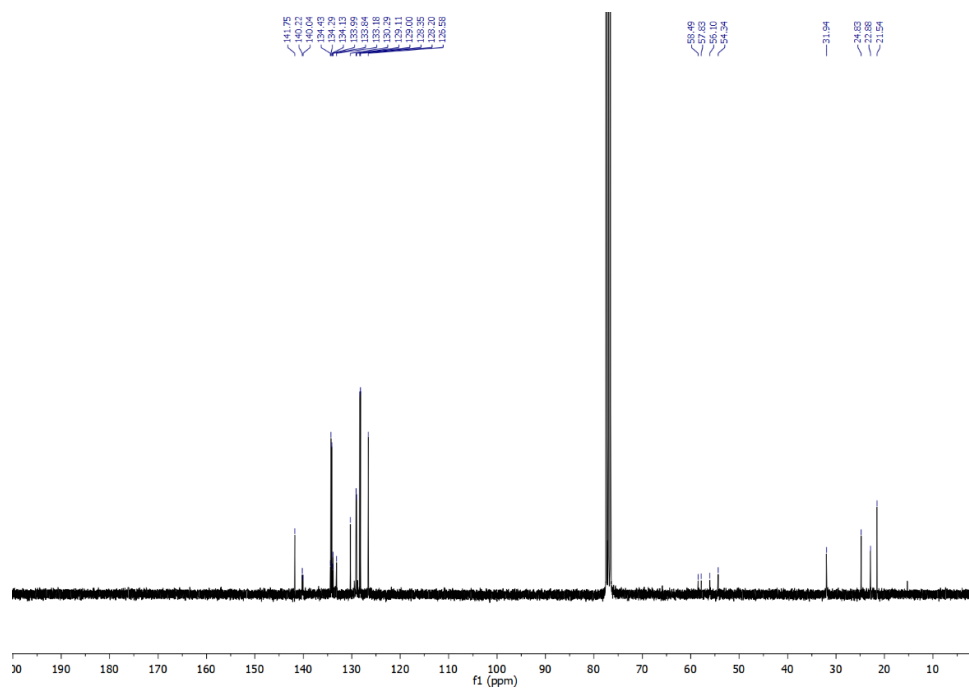

Figure S39.  $^{13}\text{C}\{^1\text{H}\}$  NMR spectrum of compound **4g** in  $\text{CDCl}_3$  at 298K

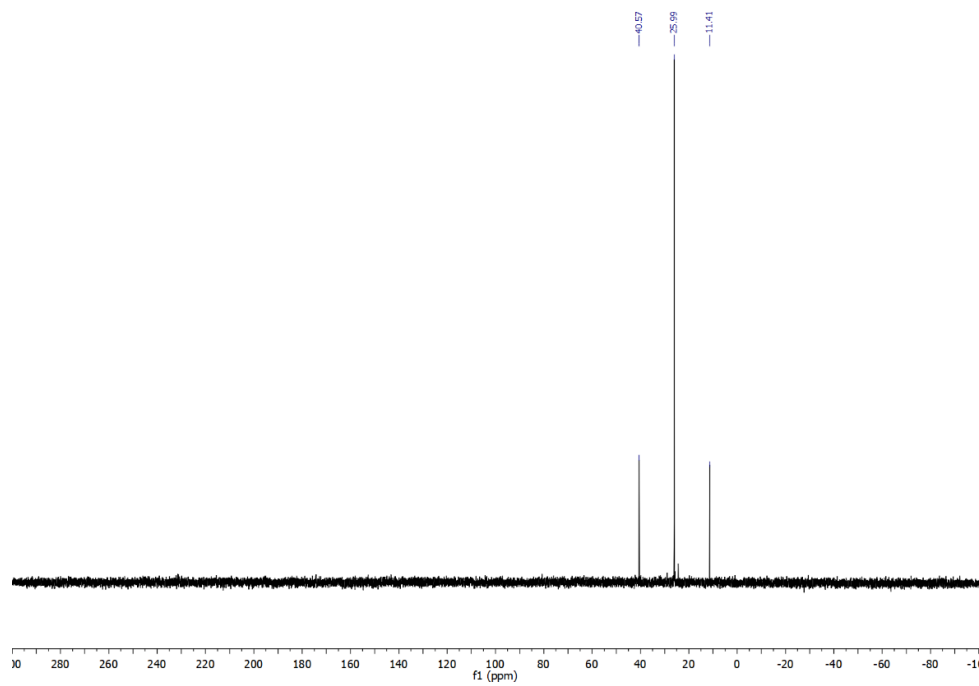

Figure S40.  $^{31}\text{P}\{^1\text{H}\}$  NMR spectrum of compound **4g** in  $\text{CDCl}_3$  at 298K

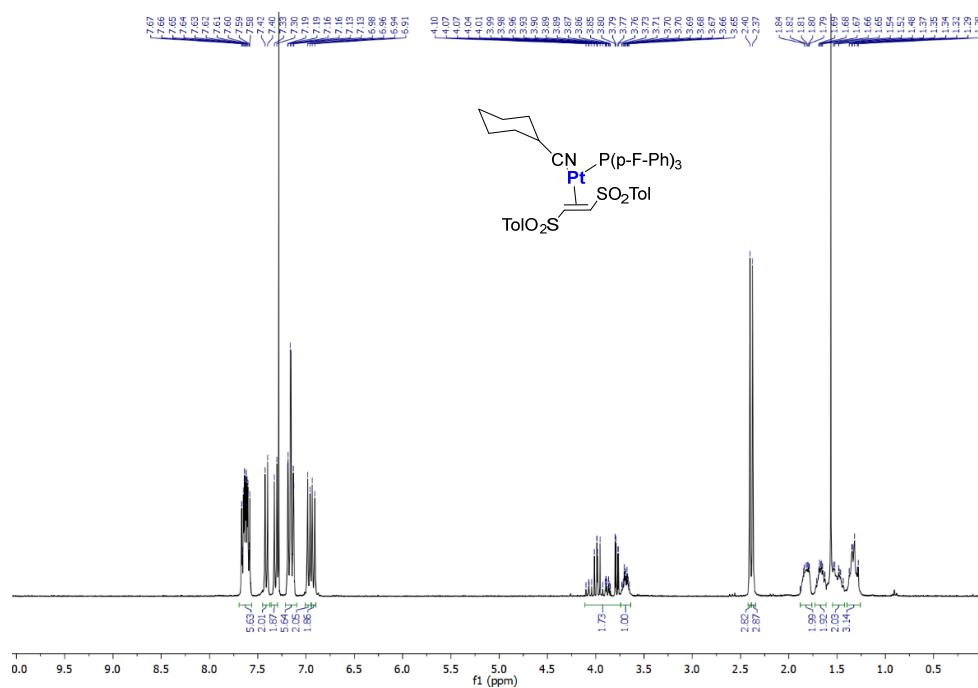

Figure S41. <sup>1</sup>H NMR spectrum of compound **4h** in CDCl<sub>3</sub> at 298K

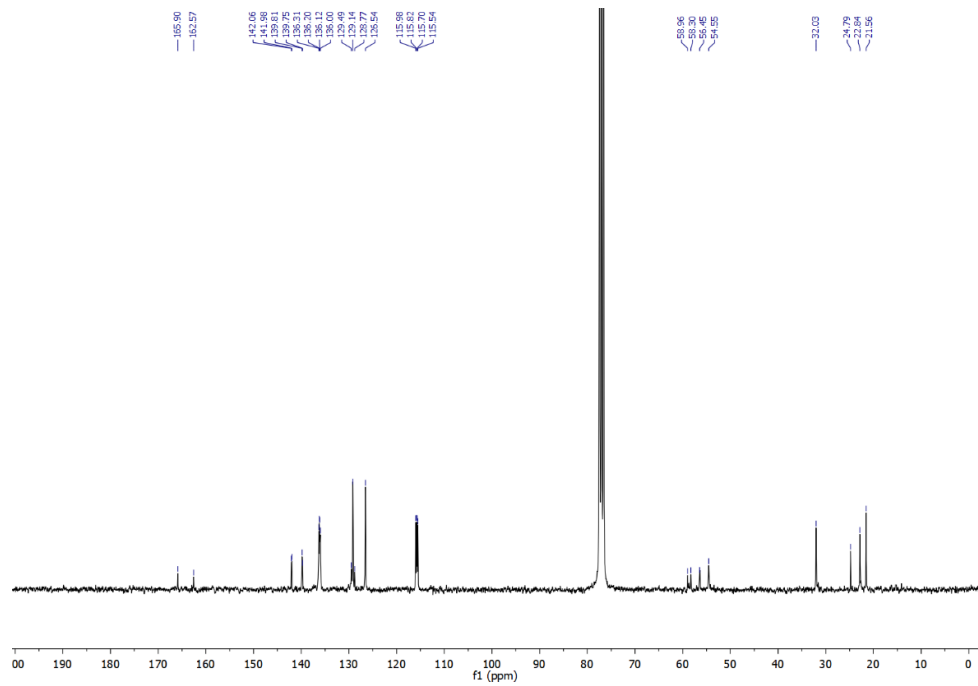

Figure S42. <sup>13</sup>C[<sup>1</sup>H] NMR spectrum of compound **4h** in CDCl<sub>3</sub> at 298K

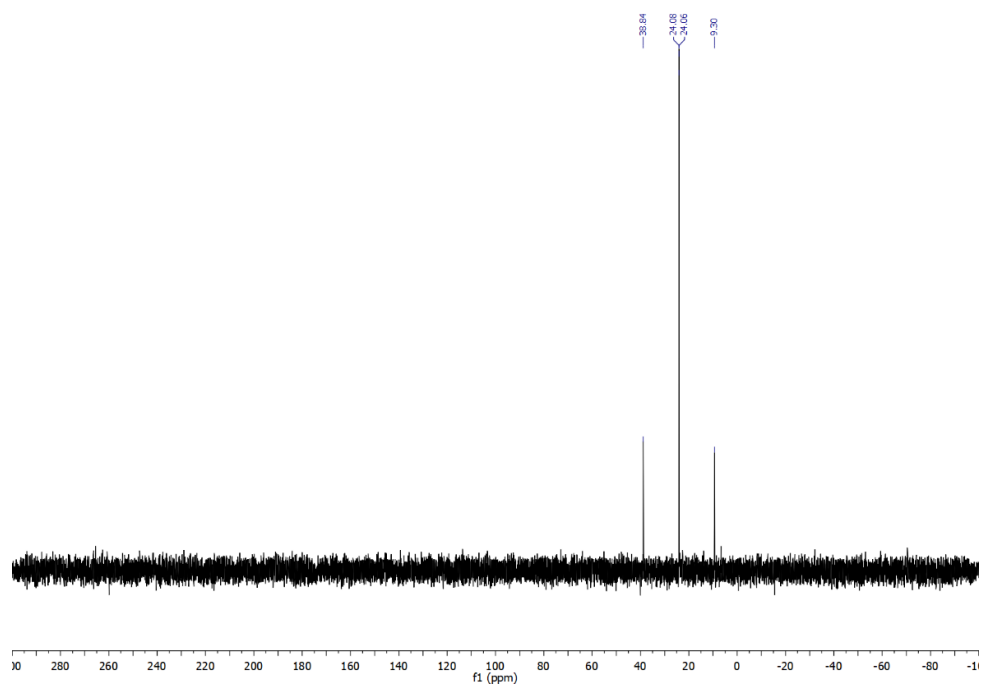

Figure S43.  $^{13}\text{C}\{^1\text{H}\}$  NMR spectrum of compound **4h** in  $\text{CDCl}_3$  at 298K

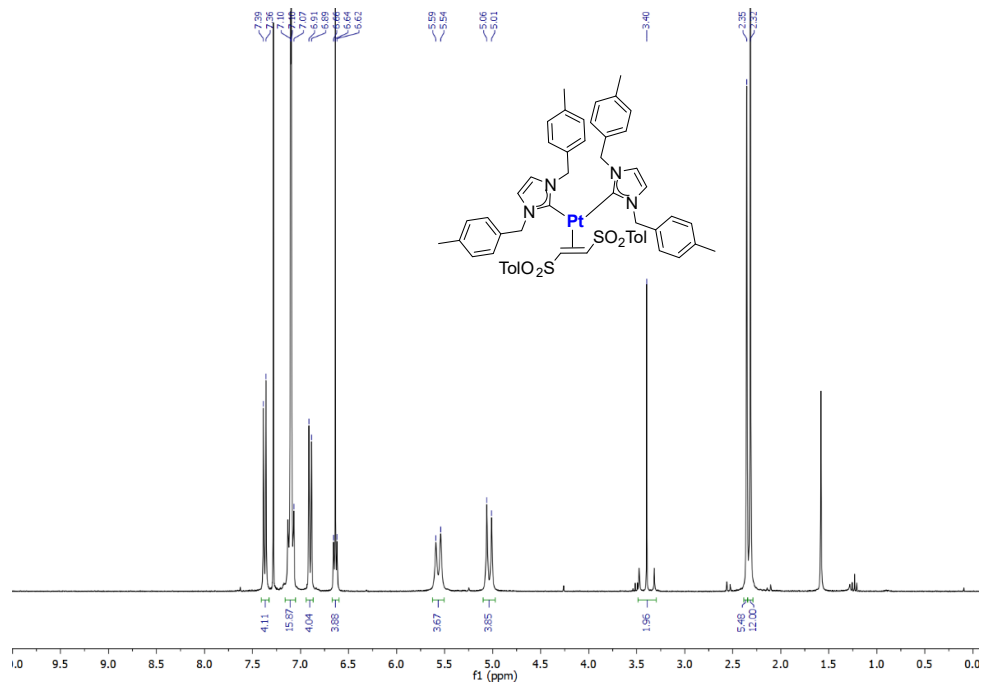

Figure S44.  $^1\text{H}$  NMR spectrum of compound **6a** in  $\text{CDCl}_3$  at 298K

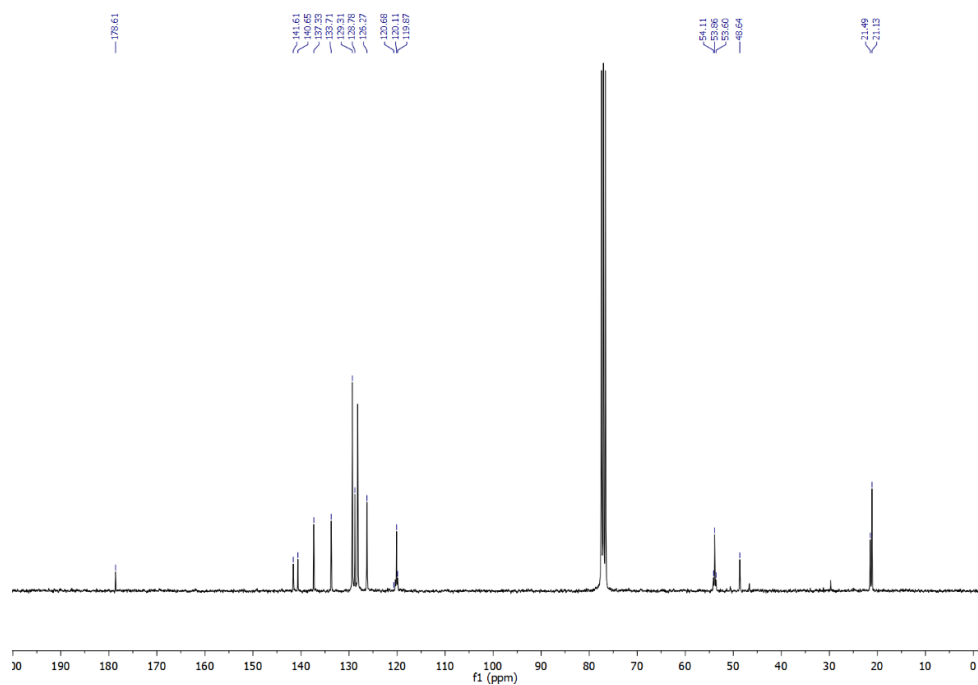

Figure S45.  $^{13}\text{C}\{^1\text{H}\}$  NMR spectrum of compound **6a** in  $\text{CDCl}_3$  at 298K

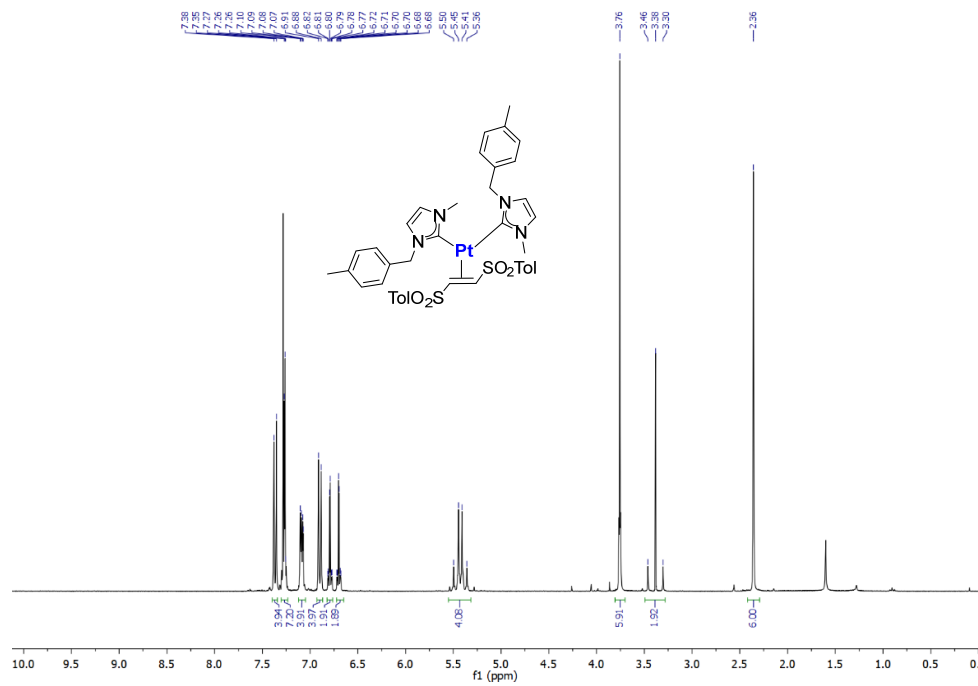

Figure S46.  $^1\text{H}$  NMR spectrum of compound **6b** in  $\text{CDCl}_3$  at 298K



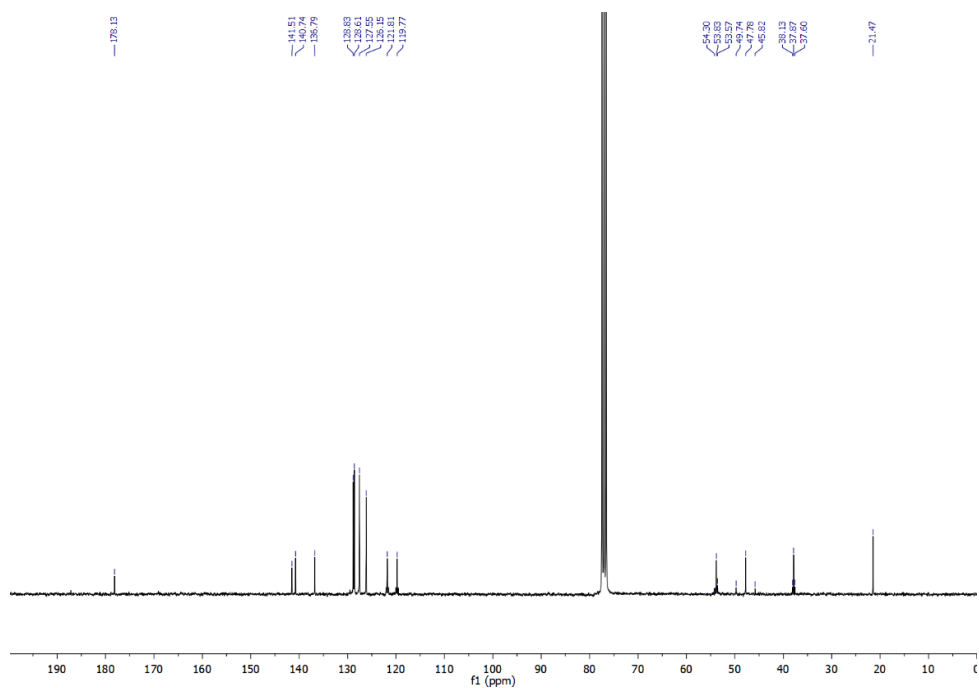

Figure S47.  $^{13}\text{C}\{^1\text{H}\}$  NMR spectrum of compound **6b** in  $\text{CDCl}_3$  at 298K

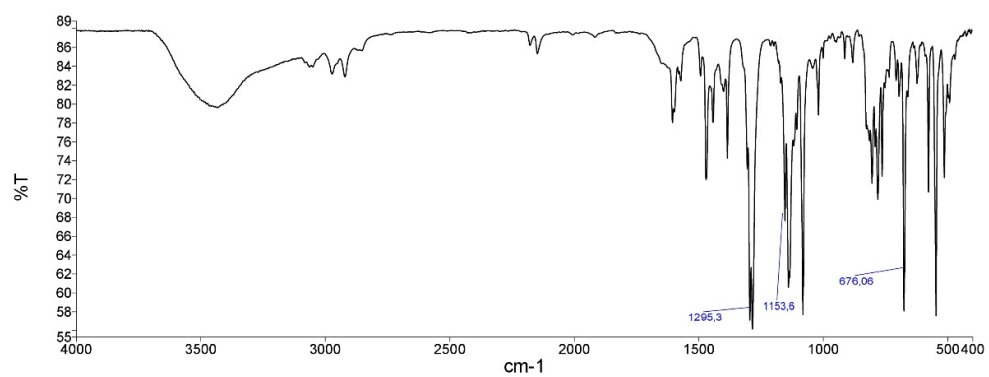

Figure S48. IR spectrum of compound **1**

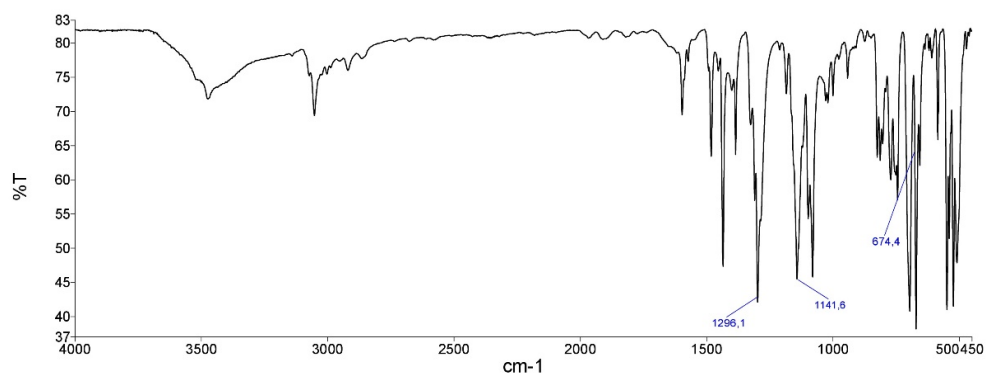

Figure S49. IR spectrum of compound 2a

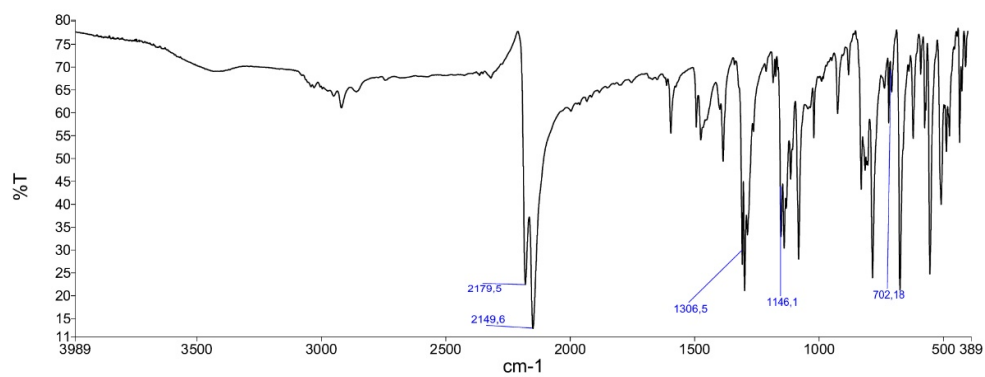

Figure S50. IR spectrum of compound 3a

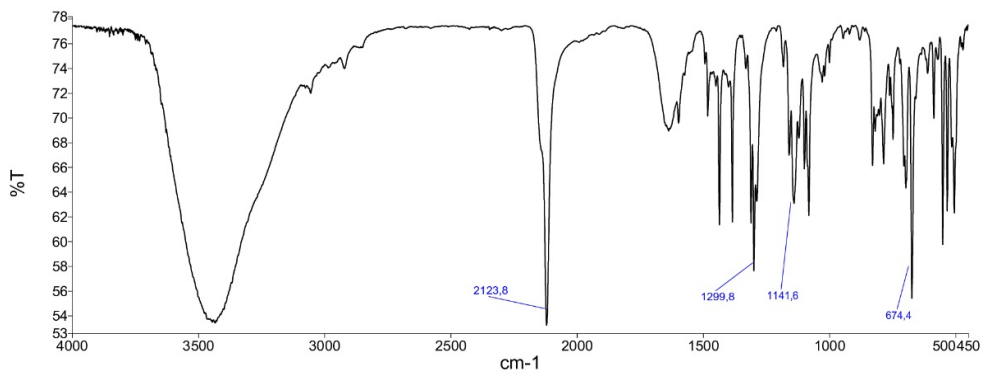

Figure S51. IR spectrum of compound 4a

## X-ray diffraction analysis - Structural characterization

**Table S1.** Crystallographic data.

| Compound                                                     | 3a@100 K                                                                       | 3b@100 K                                                                       | 2a@100 K                                                                                                                                                                                                      |
|--------------------------------------------------------------|--------------------------------------------------------------------------------|--------------------------------------------------------------------------------|---------------------------------------------------------------------------------------------------------------------------------------------------------------------------------------------------------------|
| Formula                                                      | PtC <sub>34</sub> H <sub>34</sub> N <sub>2</sub> O <sub>4</sub> S <sub>2</sub> | PtC <sub>34</sub> H <sub>34</sub> N <sub>2</sub> O <sub>8</sub> S <sub>4</sub> | PtC <sub>52</sub> H <sub>46</sub> O <sub>4</sub> P <sub>2</sub> S <sub>2</sub><br>· <sup>1</sup> / <sub>4</sub> C <sub>4</sub> H <sub>10</sub> O· <sup>1</sup> / <sub>4</sub> CH <sub>2</sub> Cl <sub>2</sub> |
| M/g·mol <sup>-1</sup>                                        | 793.84                                                                         | 921.96                                                                         | 1095.54                                                                                                                                                                                                       |
| Space group                                                  | <i>P</i> 2 <sub>1</sub> / <i>c</i>                                             | <i>P</i> -1                                                                    | <i>P</i> -1                                                                                                                                                                                                   |
| Crystal system                                               | Monoclinic                                                                     | Triclinic                                                                      | Triclinic                                                                                                                                                                                                     |
| <i>a</i> /Å                                                  | 15.496(3)                                                                      | 10.295(2)                                                                      | 14.660(3)                                                                                                                                                                                                     |
| <i>b</i> /Å                                                  | 9.010(2)                                                                       | 13.985(3)                                                                      | 17.981(4)                                                                                                                                                                                                     |
| <i>c</i> /Å                                                  | 23.067(5)                                                                      | 14.334(3)                                                                      | 18.585(4)                                                                                                                                                                                                     |
| $\alpha$ /°                                                  | 90                                                                             | 62.54(3)                                                                       | 101.57(3)                                                                                                                                                                                                     |
| $\beta$ /°                                                   | 101.56(3)                                                                      | 80.47(3)                                                                       | 96.12(3)                                                                                                                                                                                                      |
| $\gamma$ /°                                                  | 90                                                                             | 75.95(3)                                                                       | 98.80(3)                                                                                                                                                                                                      |
| <i>V</i> /Å <sup>3</sup>                                     | 3155.2(11)                                                                     | 1773.1(8)                                                                      | 4695.1(18)                                                                                                                                                                                                    |
| <i>Z</i>                                                     | 4                                                                              | 2                                                                              | 4                                                                                                                                                                                                             |
| T/K                                                          | 100(2)                                                                         | 100(2)                                                                         | 100(2)                                                                                                                                                                                                        |
| <i>D</i> <sub>c</sub> /g·cm <sup>-3</sup>                    | 1.671                                                                          | 1.727                                                                          | 1.550                                                                                                                                                                                                         |
| <i>F</i> (000)                                               | 1576                                                                           | 916                                                                            | 2203                                                                                                                                                                                                          |
| $\mu$ /mm <sup>-1</sup>                                      | 3.232                                                                          | 2.966                                                                          | 2.251                                                                                                                                                                                                         |
| Measured Reflections                                         | 60938                                                                          | 64502                                                                          | 223791                                                                                                                                                                                                        |
| Unique Reflections                                           | 10435                                                                          | 12650                                                                          | 41421                                                                                                                                                                                                         |
| <i>R</i> <sub>int</sub>                                      | 0.0397                                                                         | 0.0568                                                                         | 0.0645                                                                                                                                                                                                        |
| Obs. Refl.ns [ <i>I</i> ≥2σ( <i>I</i> )]                     | 9184                                                                           | 12023                                                                          | 39404                                                                                                                                                                                                         |
| $\theta_{\min}$ – $\theta_{\max}$ /°                         | 1.17 – 27.12                                                                   | 1.46 – 28.01                                                                   | 0.99 – 31.13                                                                                                                                                                                                  |
| <i>hkl</i> ranges                                            | -22,22; -13,13; -33,33                                                         | -15,15; -21,21; -21,21                                                         | -23,23; -29,29; -30,30                                                                                                                                                                                        |
| <i>R</i> ( <i>F</i> <sup>2</sup> ) (Obs.Refl.ns)             | 0.0289                                                                         | 0.0215                                                                         | 0.0295                                                                                                                                                                                                        |
| <i>wR</i> ( <i>F</i> <sup>2</sup> ) (All Refl.ns)            | 0.0767                                                                         | 0.0538                                                                         | 0.0737                                                                                                                                                                                                        |
| No. Variables                                                | 394                                                                            | 446                                                                            | 1193                                                                                                                                                                                                          |
| Goodness of fit                                              | 1.105                                                                          | 1.038                                                                          | 1.050                                                                                                                                                                                                         |
| $\Delta\rho_{\max}$ ; $\Delta\rho_{\min}$ /e·Å <sup>-3</sup> | 2.26; -2.39                                                                    | 1.35; -2.52                                                                    | 2.36; -2.22                                                                                                                                                                                                   |
| CCDC Deposition N.                                           | 2323081                                                                        | 2323083                                                                        | 2323084                                                                                                                                                                                                       |

  

| Compound                                  | 2a@298 K                                                                                                                                                                                                      | 4b@100 K                                                                         | 6b@100 K                                                                       |
|-------------------------------------------|---------------------------------------------------------------------------------------------------------------------------------------------------------------------------------------------------------------|----------------------------------------------------------------------------------|--------------------------------------------------------------------------------|
| Formula                                   | PtC <sub>52</sub> H <sub>46</sub> O <sub>4</sub> P <sub>2</sub> S <sub>2</sub><br>· <sup>1</sup> / <sub>4</sub> C <sub>4</sub> H <sub>10</sub> O· <sup>1</sup> / <sub>4</sub> CH <sub>2</sub> Cl <sub>2</sub> | PtC <sub>43</sub> H <sub>37</sub> F <sub>3</sub> NO <sub>4</sub> PS <sub>2</sub> | PtC <sub>38</sub> H <sub>40</sub> N <sub>4</sub> O <sub>4</sub> S <sub>2</sub> |
| M/g·mol <sup>-1</sup>                     | 1095.54                                                                                                                                                                                                       | 978.91                                                                           | 875.95                                                                         |
| Space group                               | <i>P</i> -1                                                                                                                                                                                                   | <i>P</i> 1                                                                       | <i>P</i> -1                                                                    |
| Crystal system                            | Triclinic                                                                                                                                                                                                     | Triclinic                                                                        | Triclinic                                                                      |
| <i>a</i> /Å                               | 14.754(3)                                                                                                                                                                                                     | 11.488(2)                                                                        | 10.808(2)                                                                      |
| <i>b</i> /Å                               | 18.270(4)                                                                                                                                                                                                     | 14.203(3)                                                                        | 11.808(2)                                                                      |
| <i>c</i> /Å                               | 18.705(4)                                                                                                                                                                                                     | 14.404(3)                                                                        | 15.799(3)                                                                      |
| $\alpha$ /°                               | 101.72(3)                                                                                                                                                                                                     | 62.21(3)                                                                         | 74.17(3)                                                                       |
| $\beta$ /°                                | 95.88(3)                                                                                                                                                                                                      | 75.71(3)                                                                         | 70.02(3)                                                                       |
| $\gamma$ /°                               | 98.88(3)                                                                                                                                                                                                      | 74.35(3)                                                                         | 76.02(3)                                                                       |
| <i>V</i> /Å <sup>3</sup>                  | 4830.9(18)                                                                                                                                                                                                    | 1981.8(9)                                                                        | 1798.5(8)                                                                      |
| <i>Z</i>                                  | 4                                                                                                                                                                                                             | 2                                                                                | 2                                                                              |
| T/K                                       | 298(2)                                                                                                                                                                                                        | 100(2)                                                                           | 100(2)                                                                         |
| <i>D</i> <sub>c</sub> /g·cm <sup>-3</sup> | 1.506                                                                                                                                                                                                         | 1.640                                                                            | 1.618                                                                          |
| <i>F</i> (000)                            | 2203                                                                                                                                                                                                          | 972                                                                              | 876                                                                            |
| $\mu$ /mm <sup>-1</sup>                   | 2.188                                                                                                                                                                                                         | 2.618                                                                            | 2.843                                                                          |
| Measured Reflections                      | 232518                                                                                                                                                                                                        | 70256                                                                            | 17625                                                                          |
| Unique Reflections                        | 40702                                                                                                                                                                                                         | 31365                                                                            | 5731                                                                           |
| <i>R</i> <sub>int</sub>                   | 0.0492                                                                                                                                                                                                        | 0.0420                                                                           | 0.0476                                                                         |
| Obs. Refl.ns [ <i>I</i> ≥2σ( <i>I</i> )]  | 34524                                                                                                                                                                                                         | 29616                                                                            | 5440                                                                           |
| $\theta_{\min}$ – $\theta_{\max}$ /°      | 0.98 – 31.83                                                                                                                                                                                                  | 1.41 – 30.00                                                                     | 1.17 – 27.12                                                                   |
| <i>hkl</i> ranges                         | -24,24; -29,29; -29,29                                                                                                                                                                                        | -18,18; -22,22; -23,23                                                           | -12,12; -13,13; -18,18                                                         |

|                                                                        |             |             |             |
|------------------------------------------------------------------------|-------------|-------------|-------------|
| R(F <sup>2</sup> ) (Obs.Refl.ns)                                       | 0.0343      | 0.0277      | 0.0260      |
| wR(F <sup>2</sup> ) (All Refl.ns)                                      | 0.0940      | 0.0628      | 0.0636      |
| No. Variables                                                          | 1150        | 1000        | 446         |
| Goodness of fit                                                        | 1.055       | 1.109       | 1.074       |
| $\Delta\rho_{\max}$ ; $\Delta\rho_{\min}/\text{e}\cdot\text{\AA}^{-3}$ | 1.07; -2.53 | 1.90; -2.40 | 2.35; -1.56 |
| CCDC Deposition N.                                                     | 2323085     | 2323087     | 2323082     |

**Table S2.** Selected platinum distances and angles for **3a** at 100 K.

| <b>3a (100 K) - PtC<sub>34</sub>H<sub>34</sub>N<sub>2</sub>O<sub>4</sub>S<sub>2</sub></b> |            |                                       |            |
|-------------------------------------------------------------------------------------------|------------|---------------------------------------|------------|
| <b>Distances</b>                                                                          | <b>(Å)</b> | <b>Angles</b>                         | <b>(°)</b> |
| Pt_1-C1_2                                                                                 | 2.073(2)   | C1_2-Pt_1-C2_2                        | 41.9(1)    |
| Pt_1-C2_2                                                                                 | 2.057(2)   | C2_2-Pt_1-C_3                         | 107.6(1)   |
| Pt_1-C_3                                                                                  | 1.957(3)   | C_3-Pt_1-C_4                          | 98.5(1)    |
| Pt_1-C_4                                                                                  | 1.962(3)   | C1_2-Pt_1-C_4                         | 112.0(1)   |
| C1_2=C2_2                                                                                 | 1.476(4)   | Pd Ave.- C=C-S<br>Planes <sup>a</sup> | 88.4(7)    |

<sup>a</sup>Average angle among the mean metal coordination plane and the olefinic one (defined as the plane that contains the C=C and non-H atoms directly bound).

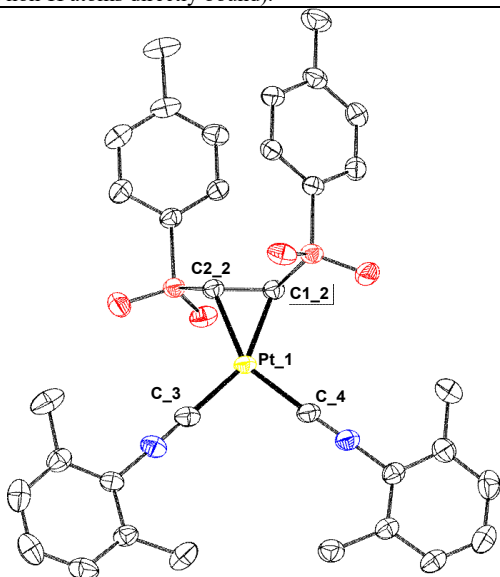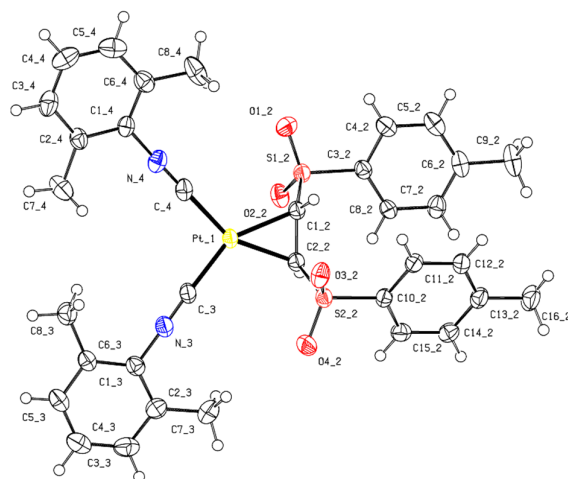

**Table S3.** Selected platinum distances and angles for **3b** at 100 K.

| <b>3b (100 K) - PtC<sub>34</sub>H<sub>34</sub>N<sub>2</sub>O<sub>8</sub>S<sub>4</sub></b> |            |                                       |            |
|-------------------------------------------------------------------------------------------|------------|---------------------------------------|------------|
| <b>Distances</b>                                                                          | <b>(Å)</b> | <b>Angles</b>                         | <b>(°)</b> |
| Pt_1-C1_2                                                                                 | 2.076(2)   | C1_2-Pt_1-C2_2                        | 41.38(6)   |
| Pt_1-C2_2                                                                                 | 2.060(2)   | C2_2-Pt_1-C_3                         | 104.87(7)  |
| Pt_1-C_3                                                                                  | 1.948(2)   | C_3-Pt_1-C_4                          | 102.90(8)  |
| Pt_1-C_4                                                                                  | 1.968(2)   | C1_2-Pt_1-C_4                         | 110.80(7)  |
| C1_2=C2_2                                                                                 | 1.462(2)   | Pd Ave.- C=C-S<br>Planes <sup>a</sup> | 89.0(5)    |

<sup>a</sup>Average angle among the mean metal coordination plane and the olefinic one (defined as the plane that contains the C=C and non-H atoms directly bound).

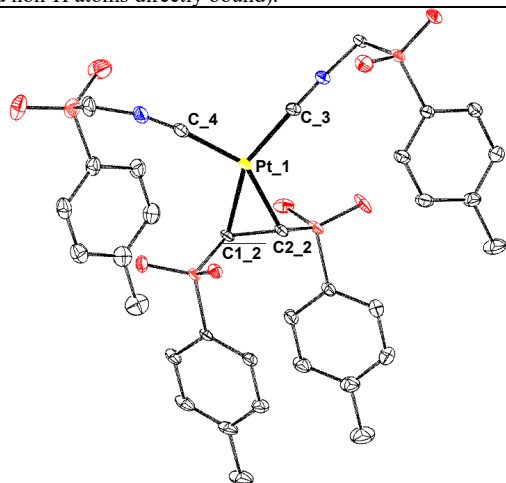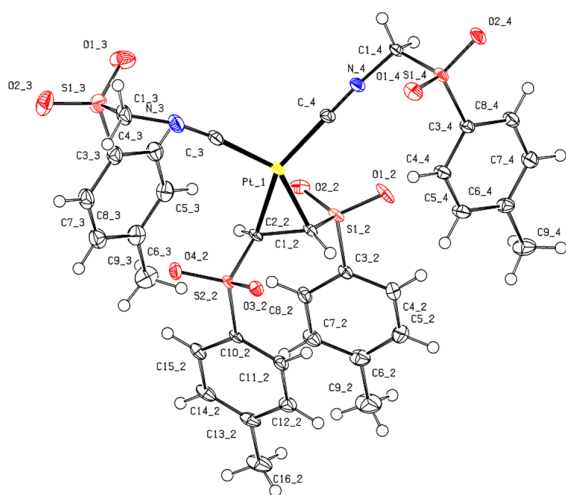

**Table S4.** Selected platinum distances and angles for **2a** at 100 K.

**2a (100 K) - PtC<sub>52</sub>H<sub>46</sub>O<sub>4</sub>P<sub>2</sub>S<sub>2</sub>**

| Molecule 1  |          |                                    |           | Molecule 2  |          |                                    |           |
|-------------|----------|------------------------------------|-----------|-------------|----------|------------------------------------|-----------|
| Distances   | (Å)      | Angles                             | (°)       | Distances   | (Å)      | Angles                             | (°)       |
| Pt_11-C1_12 | 2.090(2) | C1_12-Pt_11-C2_12                  | 40.99(8)  | Pt_21-C1_22 | 2.104(2) | C1_22-Pt_21-C2_22                  | 40.85(7)  |
| Pt_11-C2_12 | 2.070(2) | C2_12-Pt_11-P_13                   | 106.85(6) | Pt_21-C2_22 | 2.060(2) | C2_22-Pt_21-P_23                   | 101.74(5) |
| Pt_11-P_13  | 2.288(1) | P_13-Pt_11-P_14                    | 106.74(2) | Pt_21-P_23  | 2.284(1) | P_23-Pt_21-P_24                    | 107.8(1)  |
| Pt_11-P_14  | 2.283(1) | C1_12-Pt_11-P_14                   | 106.21(6) | Pt_21-P_24  | 2.286(4) | C1_22-Pt_21-P_24                   | 109.8(1)  |
| C1_12=C2_12 | 1.457(3) | Pd Ave.- C=C-S Planes <sup>a</sup> | 89.1(2)   | C1_22=C2_22 | 1.453(2) | Pd Ave.- C=C-S Planes <sup>a</sup> | 88.9(4)   |

<sup>a</sup>Average angle among the mean metal coordination plane and the olefinic one (defined as the plane that contains the C=C and non-H atoms directly bound).

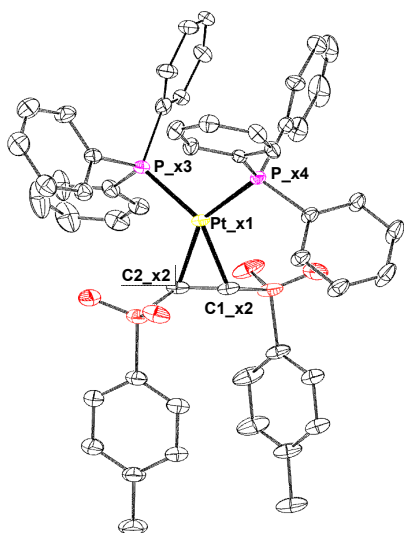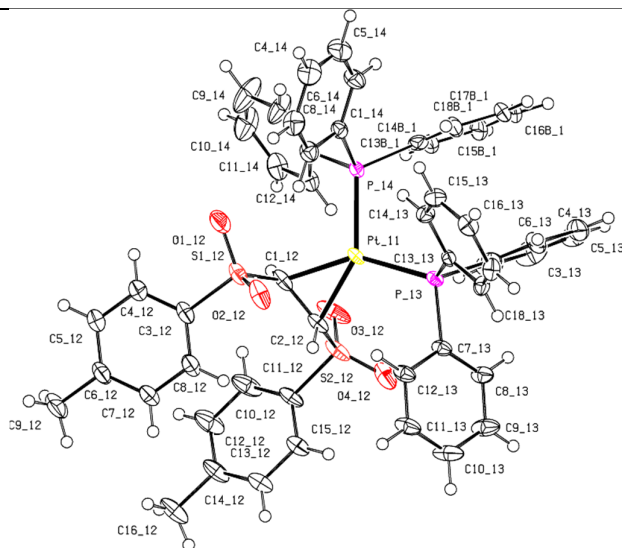

**Table S5.** Selected platinum distances and angles for **2a** at 298 K.

| 2a (298 K) - PtC <sub>52</sub> H <sub>46</sub> O <sub>4</sub> P <sub>2</sub> S <sub>2</sub> |          |                                    |           |             |          |                                    |           |
|---------------------------------------------------------------------------------------------|----------|------------------------------------|-----------|-------------|----------|------------------------------------|-----------|
| Molecule 1                                                                                  |          |                                    |           | Molecule 2  |          |                                    |           |
| Distances                                                                                   | (Å)      | Angles                             | (°)       | Distances   | (Å)      | Angles                             | (°)       |
| Pt_11-C1_12                                                                                 | 2.094(3) | C1_12-Pt_11-C2_12                  | 40.9(1)   | Pt_21-C1_22 | 2.099(2) | C1_22-Pt_21-C2_22                  | 40.88(9)  |
| Pt_11-C2_12                                                                                 | 2.067(2) | C2_12-Pt_11-P_13                   | 106.68(7) | Pt_21-C2_22 | 2.063(2) | C2_22-Pt_21-P_23                   | 102.10(7) |
| Pt_11-P_13                                                                                  | 2.292(1) | P_13-Pt_11-P_14                    | 107.04(3) | Pt_21-P_23  | 2.290(1) | P_23-Pt_21-P_24                    | 107.8(2)  |
| Pt_11-P_14                                                                                  | 2.287(1) | C1_12-Pt_11-P_14                   | 106.30(7) | Pt_21-P_24  | 2.295(9) | C1_22-Pt_21-P_24                   | 109.6(2)  |
| C1_12=C2_12                                                                                 | 1.453(3) | Pd Ave.- C=C-S Planes <sup>a</sup> | 89.8(6)   | C1_22=C2_22 | 1.454(3) | Pd Ave.- C=C-S Planes <sup>a</sup> | 88.8(7)   |

<sup>a</sup>Average angle among the mean metal coordination plane and the olefinic one (defined as the plane that contains the C=C and non-H atoms directly bound).

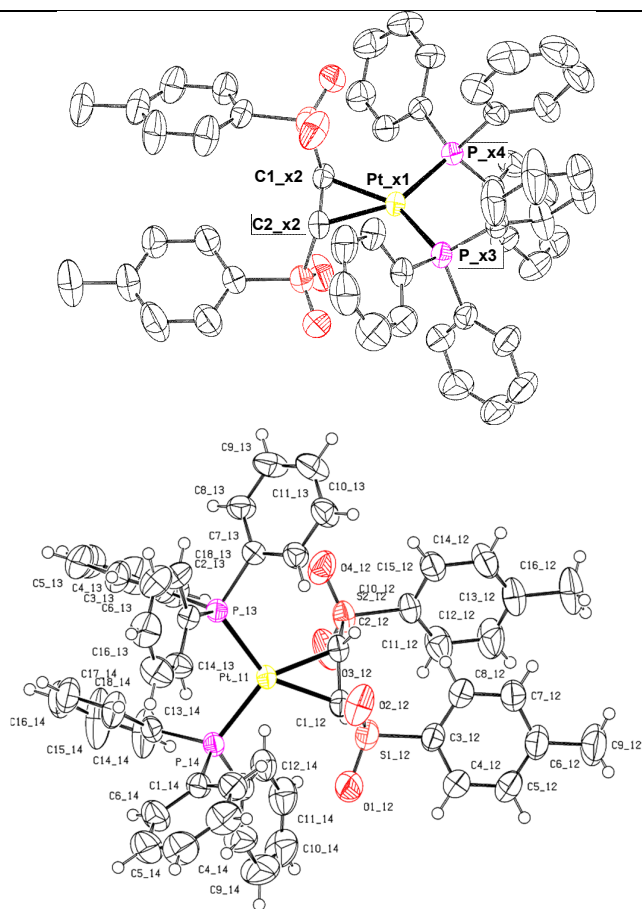



**Table S6.** Selected platinum distances and angles for **4b** at 100 K.

| 4b (100 K) - PtC <sub>43</sub> H <sub>37</sub> F <sub>3</sub> NO <sub>4</sub> PS <sub>2</sub> |          |                                    |          |             |          |                                    |          |
|-----------------------------------------------------------------------------------------------|----------|------------------------------------|----------|-------------|----------|------------------------------------|----------|
| Molecule 1                                                                                    |          |                                    |          | Molecule 2  |          |                                    |          |
| Distances                                                                                     | (Å)      | Angles                             | (°)      | Distances   | (Å)      | Angles                             | (°)      |
| Pt_11-C1_12                                                                                   | 2.073(4) | C1_12-Pt_11-C2_12                  | 41.2(2)  | Pt_21-C1_22 | 2.077(3) | C1_22-Pt_21-C2_22                  | 41.2(2)  |
| Pt_11-C2_12                                                                                   | 2.081(4) | C2_12-Pt_11-C_13                   | 108.9(2) | Pt_21-C2_22 | 2.078(4) | C2_22-Pt_21-C_23                   | 109.8(2) |
| Pt_11-C_13                                                                                    | 1.942(3) | C_13-Pt_11-P_14                    | 101.5(1) | Pt_21-C_23  | 1.941(3) | C_23-Pt_21-P_24                    | 99.1(1)  |
| Pt_11-P_14                                                                                    | 2.305(1) | C1_12-Pt_11-P_14                   | 108.5(1) | Pt_21-P_24  | 2.289(1) | C1_22-Pt_21-P_24                   | 110.5(1) |
| C1_12=C2_12                                                                                   | 1.461(5) | Pd Ave.- C=C-S Planes <sup>a</sup> | 87.2(6)  | C1_22=C2_22 | 1.462(5) | Pd Ave.- C=C-S Planes <sup>a</sup> | 83.5(3)  |

<sup>a</sup>Average angle among the mean metal coordination plane and the olefinic one (defined as the plane that contains the C=C and non-H atoms directly bound).

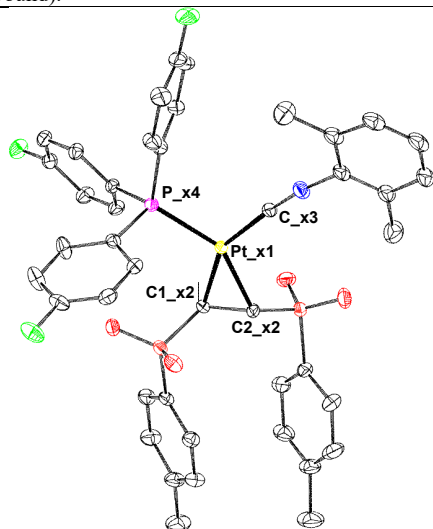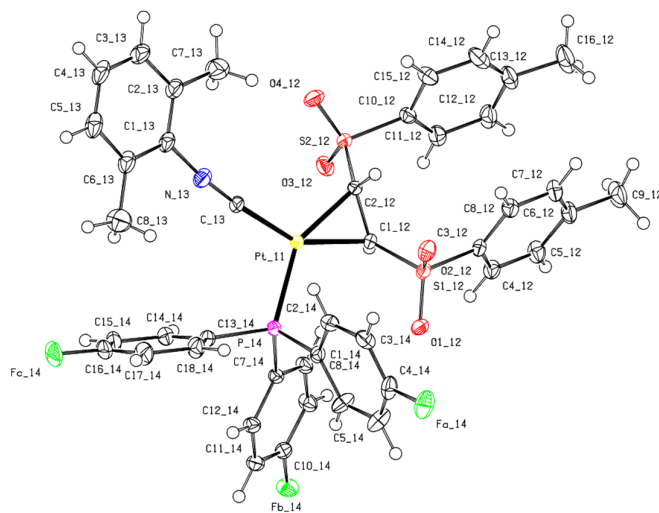

**Table S7.** Selected platinum distances and angles  
for **6b** at 100 K.

| <b>6b (100 K) - PtC<sub>38</sub>H<sub>40</sub>N<sub>4</sub>O<sub>4</sub>S<sub>2</sub></b> |            |                                    |            |
|-------------------------------------------------------------------------------------------|------------|------------------------------------|------------|
| <b>Distances</b>                                                                          | <b>(Å)</b> | <b>Angles</b>                      | <b>(°)</b> |
| Pt_1-C1_2                                                                                 | 2.064(5)   | C1_2-Pt_1-C2_2                     | 42.0(2)    |
| Pt_1-C2_2                                                                                 | 2.078(5)   | C2_2-Pt_1-C1_4                     | 109.2(2)   |
| Pt_1-C1_3                                                                                 | 2.020(5)   | C1_3-Pt_1-C1_4                     | 99.3(2)    |
| Pt_1-C1_4                                                                                 | 2.007(4)   | C1_2-Pt_1-C1_3                     | 109.5(2)   |
| C1_2=C2_2                                                                                 | 1.486(5)   | Pd Ave.- C=C-S Planes <sup>a</sup> | 86.2(3)    |
|                                                                                           |            | Pd Ave.- NHC Planes <sup>b</sup>   | 73.8(3)    |

<sup>a</sup>Average angle among the mean metal coordination plane and the olefinic one (defined as the plane that contains the C=C and non-H atoms directly bound).  
<sup>b</sup>Average angle among the mean metal coordination plane and the NHC ones (defined as the plane that contains the C=C and non-H atoms directly bound).

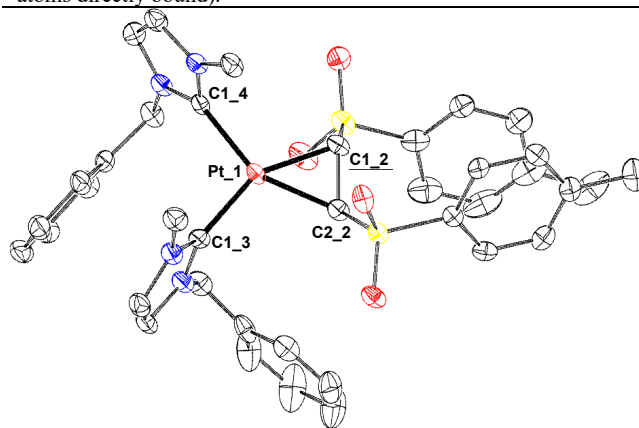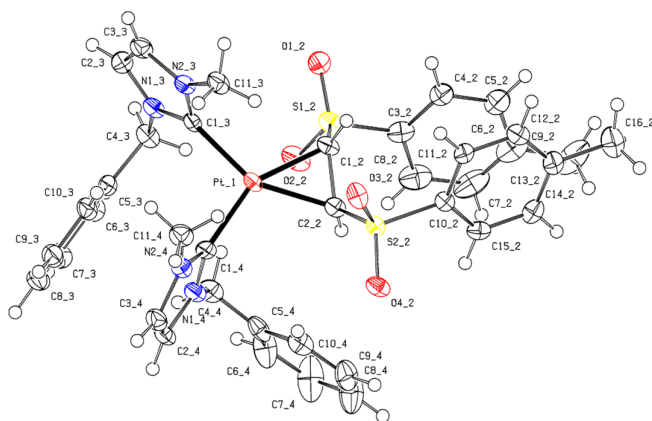

Supplement: s1 [file s1]
