# Supplementary material for: Platinum(0)-η2-1,2-(E)ditosylethene Complexes Bearing Phosphine, Isocyanide and N-Heterocyclic Carbene Ligands: Synthesis and Cytotoxicity towards Ovarian and Breast Cancer Cells
Source: MDPI journal article supplement (doi:10.3390/molecules29051119), 2024-03-01

## checkCIF/PLATON report

Structure factors have been supplied for datablock(s) NC5RT

THIS REPORT IS FOR GUIDANCE ONLY. IF USED AS PART OF A REVIEW PROCEDURE FOR PUBLICATION, IT SHOULD NOT REPLACE THE EXPERTISE OF AN EXPERIENCED CRYSTALLOGRAPHIC REFEREE.

No syntax errors found.      CIF dictionary      Interpreting this report

### Datablock: NC5RT

---

|                 |                                                               |                                                          |
|-----------------|---------------------------------------------------------------|----------------------------------------------------------|
| Bond precision: | C-C = 0.0033 A                                                | Wavelength=0.62000                                       |
| Cell:           | a=14.754 (3)                                                  | b=18.270 (4)      c=18.705 (4)                           |
|                 | alpha=101.72 (3)                                              | beta=95.88 (3)      gamma=98.88 (3)                      |
| Temperature:    | 298 K                                                         |                                                          |
|                 | Calculated                                                    | Reported                                                 |
| Volume          | 4831 (2)                                                      | 4830.9 (18)                                              |
| Space group     | P -1                                                          | P -1                                                     |
| Hall group      | -P 1                                                          | -P 1                                                     |
| Moiety formula  | C52 H46 O4 P2 Pt S2,<br>0.265 (C4 H10 O), 0.229 (C H2<br>Cl2) | C52 H46 O4 P2 Pt S2, 0.25<br>(C4 H10 O), 0.25 (C H2 Cl2) |
| Sum formula     | C53.29 H49.11 Cl0.46 O4.27<br>P2 Pt S2                        | C53.25 H48.75 Cl0.50 O4.25<br>P2 Pt S2                   |
| Mr              | 1095.16                                                       | 1095.54                                                  |
| Dx, g cm-3      | 1.506                                                         | 1.506                                                    |
| Z               | 4                                                             | 4                                                        |
| Mu (mm-1)       | 2.186                                                         | 2.188                                                    |
| F000            | 2203.1                                                        | 2203.0                                                   |
| F000'           | 2201.72                                                       |                                                          |
| h, k, lmax      | 25, 31, 31                                                    | 24, 29, 29                                               |
| Nref            | 49787                                                         | 40702                                                    |
| Tmin, Tmax      | 0.877, 0.957                                                  |                                                          |
| Tmin'           | 0.803                                                         |                                                          |

Correction method= Not given

Data completeness= 0.818

Theta (max)= 31.827

R(reflections)= 0.0343( 34524)

wR2(reflections)=  
0.0940( 40702)

S = 1.055

Npar= 1150

---

The following ALERTS were generated. Each ALERT has the format

**test-name\_ALERT\_alert-type\_alert-level.**

Click on the hyperlinks for more details of the test.

---

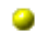

### Alert level C

|                   |                                                  |                                 |              |
|-------------------|--------------------------------------------------|---------------------------------|--------------|
| PLAT041_ALERT_1_C | Calc. and Reported SumFormula                    | Strings Differ                  | Please Check |
| PLAT042_ALERT_1_C | Calc. and Reported MoietyFormula                 | Strings Differ                  | Please Check |
| PLAT077_ALERT_4_C | Unitcell Contains Non-integer Number of Atoms .. |                                 | Please Check |
| PLAT220_ALERT_2_C | NonSolvent Resd 1 C                              | Ueq(max)/Ueq(min) Range         | 3.5 Ratio    |
| PLAT220_ALERT_2_C | NonSolvent Resd 2 C                              | Ueq(max)/Ueq(min) Range         | 3.2 Ratio    |
| PLAT234_ALERT_4_C | Large Hirshfeld Difference C16B_24               | --C15B_24                       | 0.16 Ang.    |
| PLAT241_ALERT_2_C | High 'MainMol'                                   | Ueq as Compared to Neighbors of | C5_12 Check  |
| PLAT241_ALERT_2_C | High 'MainMol'                                   | Ueq as Compared to Neighbors of | C12_12 Check |
| PLAT241_ALERT_2_C | High 'MainMol'                                   | Ueq as Compared to Neighbors of | C15_14 Check |
| PLAT241_ALERT_2_C | High 'MainMol'                                   | Ueq as Compared to Neighbors of | C9_14 Check  |
| PLAT242_ALERT_2_C | Low 'MainMol'                                    | Ueq as Compared to Neighbors of | C6_22 Check  |
| PLAT242_ALERT_2_C | Low 'MainMol'                                    | Ueq as Compared to Neighbors of | C6_12 Check  |
| PLAT242_ALERT_2_C | Low 'MainMol'                                    | Ueq as Compared to Neighbors of | C13_12 Check |
| PLAT242_ALERT_2_C | Low 'MainMol'                                    | Ueq as Compared to Neighbors of | C16_14 Check |
| PLAT242_ALERT_2_C | Low 'MainMol'                                    | Ueq as Compared to Neighbors of | C13_14 Check |
| PLAT260_ALERT_2_C | Large Average Ueq of Residue Including           | O1_91                           | 0.205 Check  |
| PLAT260_ALERT_2_C | Large Average Ueq of Residue Including           | C11A_92                         | 0.247 Check  |
| PLAT260_ALERT_2_C | Large Average Ueq of Residue Including           | C11B_92                         | 0.241 Check  |
| PLAT911_ALERT_3_C | Missing FCF Refl Between Thmin & STh/L=          | 0.600                           | 335 Report   |
| PLAT972_ALERT_2_C | Check Calcd Resid. Dens.                         | 0.61Ang From Pt_11              | -2.50 eA-3   |
| PLAT972_ALERT_2_C | Check Calcd Resid. Dens.                         | 0.64Ang From Pt_11              | -2.45 eA-3   |
| PLAT972_ALERT_2_C | Check Calcd Resid. Dens.                         | 0.61Ang From Pt_21              | -2.27 eA-3   |
| PLAT972_ALERT_2_C | Check Calcd Resid. Dens.                         | 0.57Ang From Pt_21              | -2.02 eA-3   |
| PLAT972_ALERT_2_C | Check Calcd Resid. Dens.                         | 0.55Ang From Pt_21              | -1.82 eA-3   |
| PLAT972_ALERT_2_C | Check Calcd Resid. Dens.                         | 0.68Ang From Pt_21              | -1.74 eA-3   |
| PLAT975_ALERT_2_C | Check Calcd Resid. Dens.                         | 1.01Ang From O2_12              | 0.65 eA-3    |

---

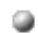

### Alert level G

FORMU01\_ALERT\_1\_G There is a discrepancy between the atom counts in the  
\_chemical\_formula\_sum and \_chemical\_formula\_moiety. This is  
usually due to the moiety formula being in the wrong format.  
Atom count from \_chemical\_formula\_sum: C53.25 H48.75 Cl0.5 O4.25 P2  
Atom count from \_chemical\_formula\_moiety:C53.25 H49 Cl0.5 O4.25 P2 Pt1

FORMU01\_ALERT\_2\_G There is a discrepancy between the atom counts in the  
\_chemical\_formula\_sum and the formula from the \_atom\_site\* data.  
Atom count from \_chemical\_formula\_sum:C53.25 H48.75 Cl0.5 O4.25 P2 Pt1  
Atom count from the \_atom\_site data: C53.28950 H49.10900 Cl0.459 O4.2

ABSMU01\_ALERT\_1\_G Calculation of \_exptl\_absorpt\_correction\_mu  
not performed for this radiation type.

CELLZ01\_ALERT\_1\_G Difference between formula and atom\_site contents detected.

CELLZ01\_ALERT\_1\_G ALERT: Large difference may be due to a  
symmetry error - see SYMMG tests  
From the CIF: \_cell\_formula\_units\_Z 4  
From the CIF: \_chemical\_formula\_sum C53.25 H48.75 Cl0.50 O4.25 P2 Pt S

TEST: Compare cell contents of formula and atom\_site data

| atom              | Z*formula                                        | cif sites | diff         |          |
|-------------------|--------------------------------------------------|-----------|--------------|----------|
| C                 | 213.00                                           | 213.16    | -0.16        |          |
| H                 | 195.00                                           | 196.44    | -1.44        |          |
| Cl                | 2.00                                             | 1.84      | 0.16         |          |
| O                 | 17.00                                            | 17.06     | -0.06        |          |
| P                 | 8.00                                             | 8.00      | 0.00         |          |
| Pt                | 4.00                                             | 4.00      | 0.00         |          |
| S                 | 8.00                                             | 8.00      | 0.00         |          |
| PLAT002_ALERT_2_G | Number of Distance or Angle Restraints on AtSite |           |              | 11 Note  |
| PLAT003_ALERT_2_G | Number of Uiso or Uij Restrained non-H Atoms ... |           |              | 6 Report |
| PLAT092_ALERT_4_G | Check: Wavelength Given is not Cu,Ga,Mo,Ag,In Ka | 0.62000   | Ang.         |          |
| PLAT152_ALERT_1_G | The Supplied and Calc. Volume s.u. Differ by ... |           |              | 2 Units  |
| PLAT154_ALERT_1_G | The s.u.'s on the Cell Angles are Equal ..(Note) | 0.03      | Degree       |          |
| PLAT172_ALERT_4_G | The CIF-Embedded .res File Contains DFIX Records |           |              | 3 Report |
| PLAT173_ALERT_4_G | The CIF-Embedded .res File Contains DANG Records |           |              | 3 Report |
| PLAT175_ALERT_4_G | The CIF-Embedded .res File Contains SAME Records |           |              | 1 Report |
| PLAT176_ALERT_4_G | The CIF-Embedded .res File Contains SADI Records |           |              | 2 Report |
| PLAT178_ALERT_4_G | The CIF-Embedded .res File Contains SIMU Records |           |              | 1 Report |
| PLAT188_ALERT_3_G | A Non-default SIMU Restraint Value has been used | 0.0100    | Report       |          |
| PLAT301_ALERT_3_G | Main Residue Disorder .....(Resd 1 )             |           | 31% Note     |          |
| PLAT302_ALERT_4_G | Anion/Solvent/Minor-Residue Disorder (Resd 3 )   |           | 100% Note    |          |
| PLAT302_ALERT_4_G | Anion/Solvent/Minor-Residue Disorder (Resd 4 )   |           | 100% Note    |          |
| PLAT302_ALERT_4_G | Anion/Solvent/Minor-Residue Disorder (Resd 5 )   |           | 100% Note    |          |
| PLAT304_ALERT_4_G | Non-Integer Number of Atoms in ..... (Resd 3 )   |           | 7.95 Check   |          |
| PLAT304_ALERT_4_G | Non-Integer Number of Atoms in ..... (Resd 4 )   |           | 1.13 Check   |          |
| PLAT304_ALERT_4_G | Non-Integer Number of Atoms in ..... (Resd 5 )   |           | 1.16 Check   |          |
| PLAT343_ALERT_2_G | Unusual sp? Angle Range in Main Residue for      | C2_22     | Check        |          |
| PLAT411_ALERT_2_G | Short Inter H...H Contact H11_14 ..H9A_24        |           | 2.10 Ang.    |          |
|                   | 1-x,1-y,1-z =                                    | 2_666     | Check        |          |
| PLAT413_ALERT_2_G | Short Inter XH3 .. XHn H4A3_91 ..H4_22           |           | 2.14 Ang.    |          |
|                   | x,y,z =                                          | 1_555     | Check        |          |
| PLAT720_ALERT_4_G | Number of Unusual/Non-Standard Labels .....      |           | 273 Note     |          |
| PLAT721_ALERT_1_G | Bond Calc 0.96000, Rep 0.97000 Dev...            |           | 0.01 Ang.    |          |
|                   | C1B_92 -H1D_92 1_555 1_555 .....                 | #         | 22 Check     |          |
| PLAT789_ALERT_4_G | Atoms with Negative _atom_site_disorder_group #  |           | 10 Check     |          |
| PLAT822_ALERT_4_G | CIF-embedded .res Contains Negative PART Numbers |           | 2 Check      |          |
| PLAT860_ALERT_3_G | Number of Least-Squares Restraints .....         |           | 70 Note      |          |
| PLAT912_ALERT_4_G | Missing # of FCF Reflections Above STh/L= 0.600  |           | 8175 Note    |          |
| PLAT933_ALERT_2_G | Number of HKL-OMIT Records in Embedded .res File |           | 35 Note      |          |
| PLAT951_ALERT_5_G | Calculated (ThMax) and CIF-Reported Kmax Differ  |           | 2 Units      |          |
| PLAT952_ALERT_5_G | Calculated (ThMax) and CIF-Reported Lmax Differ. |           | 2 Units      |          |
| PLAT957_ALERT_1_G | Calculated (ThMax) and Actual (FCF) Kmax Differ  |           | 2 Units      |          |
| PLAT958_ALERT_1_G | Calculated (ThMax) and Actual (FCF) Lmax Differ. |           | 2 Units      |          |
| PLAT965_ALERT_2_G | The SHELXL WEIGHT Optimisation has not Converged |           | Please Check |          |
| PLAT978_ALERT_2_G | Number C-C Bonds with Positive Residual Density. |           | 0 Info       |          |

- 
- 0 **ALERT level A** = Most likely a serious problem - resolve or explain  
0 **ALERT level B** = A potentially serious problem, consider carefully  
26 **ALERT level C** = Check. Ensure it is not caused by an omission or oversight  
39 **ALERT level G** = General information/check it is not something unexpected
- 11 ALERT type 1 CIF construction/syntax error, inconsistent or missing data

30 ALERT type 2 Indicator that the structure model may be wrong or deficient  
4 ALERT type 3 Indicator that the structure quality may be low  
18 ALERT type 4 Improvement, methodology, query or suggestion  
2 ALERT type 5 Informative message, check

---

It is advisable to attempt to resolve as many as possible of the alerts in all categories. Often the minor alerts point to easily fixed oversights, errors and omissions in your CIF or refinement strategy, so attention to these fine details can be worthwhile. In order to resolve some of the more serious problems it may be necessary to carry out additional measurements or structure refinements. However, the purpose of your study may justify the reported deviations and the more serious of these should normally be commented upon in the discussion or experimental section of a paper or in the "special\_details" fields of the CIF. checkCIF was carefully designed to identify outliers and unusual parameters, but every test has its limitations and alerts that are not important in a particular case may appear. Conversely, the absence of alerts does not guarantee there are no aspects of the results needing attention. It is up to the individual to critically assess their own results and, if necessary, seek expert advice.

### **Publication of your CIF in IUCr journals**

A basic structural check has been run on your CIF. These basic checks will be run on all CIFs submitted for publication in IUCr journals (*Acta Crystallographica*, *Journal of Applied Crystallography*, *Journal of Synchrotron Radiation*); however, if you intend to submit to *Acta Crystallographica Section C* or *E* or *IUCrData*, you should make sure that full publication checks are run on the final version of your CIF prior to submission.

### **Publication of your CIF in other journals**

Please refer to the *Notes for Authors* of the relevant journal for any special instructions relating to CIF submission.

---

**PLATON version of 06/07/2023; check.def file version of 30/06/2023**

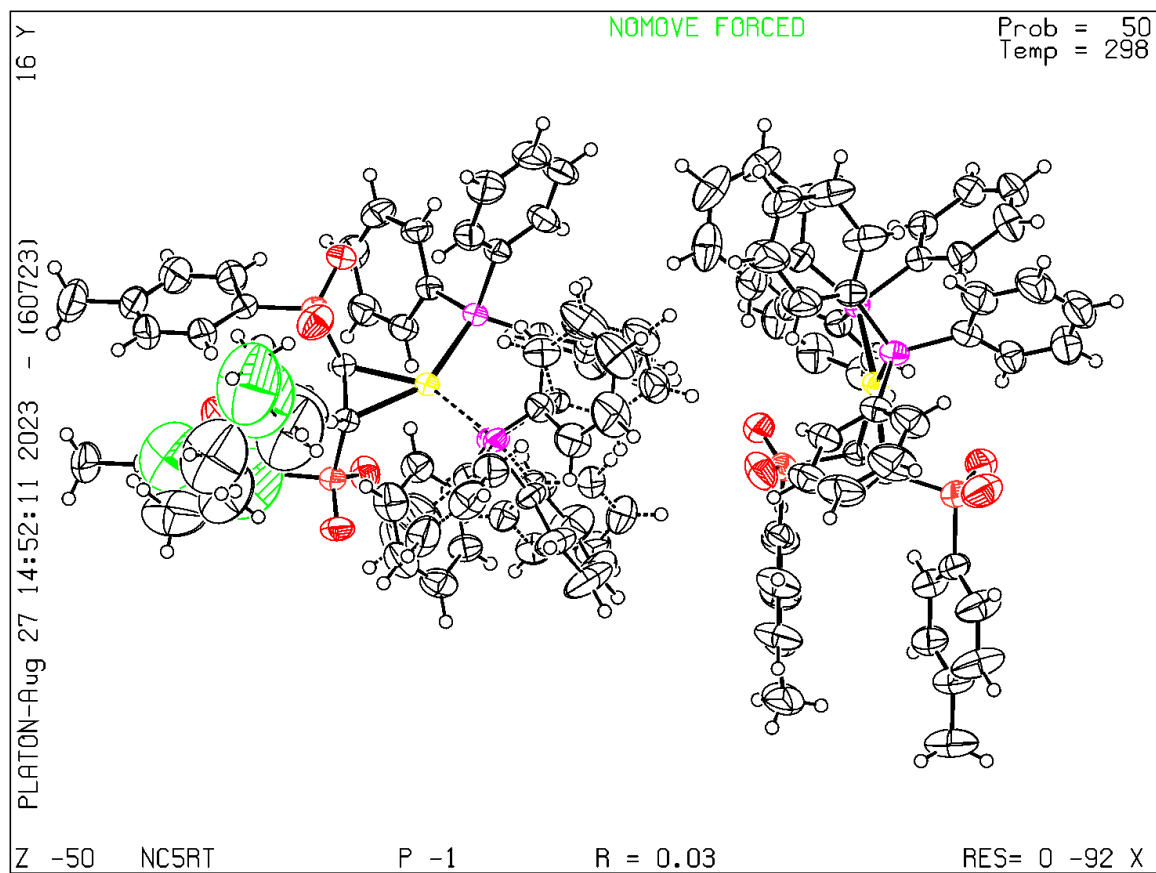

Supplement: s1 [file s1]
