# Supplementary material for: Platinum(0)-η2-1,2-(E)ditosylethene Complexes Bearing Phosphine, Isocyanide and N-Heterocyclic Carbene Ligands: Synthesis and Cytotoxicity towards Ovarian and Breast Cancer Cells
Source: MDPI journal article supplement (doi:10.3390/molecules29051119), 2024-03-01
Supplement: s1 [file s1]

```
R(reflections)= 0.0260( 5440)
S = 1.074
Npar= 446
```

---

The following ALERTS were generated. Each ALERT has the format

**test-name\_ALERT\_alert-type\_alert-level.**

Click on the hyperlinks for more details of the test.

---

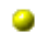

### Alert level C

THETM01\_ALERT\_3\_C The value of  $\sin(\theta_{\max})/\lambda$  is less than 0.590  
Calculated  $\sin(\theta_{\max})/\lambda = 0.5780$   
PLAT057\_ALERT\_3\_C Correction for Absorption Required RT(exp) ... 1.12 Do !  
PLAT220\_ALERT\_2\_C NonSolvent Resd 1 C Ueq(max)/Ueq(min) Range 3.5 Ratio  
PLAT911\_ALERT\_3\_C Missing FCF Refl Between Thmin & STh/L= 0.578 101 Report  
PLAT971\_ALERT\_2\_C Check Calcd Resid. Dens. 0.88Ang From Pt\_1 2.50 eA-3  
PLAT971\_ALERT\_2\_C Check Calcd Resid. Dens. 1.00Ang From Pt\_1 1.74 eA-3

---

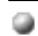

### Alert level G

ABSMU01\_ALERT\_1\_G Calculation of  $\mu_{\text{exptl\_absorpt\_correction}}$   
not performed for this radiation type.  
PLAT092\_ALERT\_4\_G Check: Wavelength Given is not Cu,Ga,Mo,Ag,In Ka 0.62000 Ang.  
PLAT154\_ALERT\_1\_G The s.u.'s on the Cell Angles are Equal ..(Note) 0.03 Degree  
PLAT343\_ALERT\_2\_G Unusual sp? Angle Range in Main Residue for C2\_2 Check  
PLAT720\_ALERT\_4\_G Number of Unusual/Non-Standard Labels ..... 89 Note  
PLAT794\_ALERT\_5\_G Tentative Bond Valency for Pt\_1 (II) 1.87 Info  
PLAT909\_ALERT\_3\_G Percentage of  $I > 2\sigma(I)$  Data at Theta(Max) Still 90% Note  
PLAT933\_ALERT\_2\_G Number of HKL-OMIT Records in Embedded .res File 43 Note  
PLAT941\_ALERT\_3\_G Average HKL Measurement Multiplicity ..... 3.1 Low  
PLAT965\_ALERT\_2\_G The SHELXL WEIGHT Optimisation has not Converged Please Check  
PLAT978\_ALERT\_2\_G Number C-C Bonds with Positive Residual Density. 0 Info

---

- 0 **ALERT level A** = Most likely a serious problem - resolve or explain  
0 **ALERT level B** = A potentially serious problem, consider carefully  
6 **ALERT level C** = Check. Ensure it is not caused by an omission or oversight  
11 **ALERT level G** = General information/check it is not something unexpected

- 2 ALERT type 1 CIF construction/syntax error, inconsistent or missing data  
7 ALERT type 2 Indicator that the structure model may be wrong or deficient  
5 ALERT type 3 Indicator that the structure quality may be low  
2 ALERT type 4 Improvement, methodology, query or suggestion  
1 ALERT type 5 Informative message, check
- 
-

It is advisable to attempt to resolve as many as possible of the alerts in all categories. Often the minor alerts point to easily fixed oversights, errors and omissions in your CIF or refinement strategy, so attention to these fine details can be worthwhile. In order to resolve some of the more serious problems it may be necessary to carry out additional measurements or structure refinements. However, the purpose of your study may justify the reported deviations and the more serious of these should normally be commented upon in the discussion or experimental section of a paper or in the "special\_details" fields of the CIF. checkCIF was carefully designed to identify outliers and unusual parameters, but every test has its limitations and alerts that are not important in a particular case may appear. Conversely, the absence of alerts does not guarantee there are no aspects of the results needing attention. It is up to the individual to critically assess their own results and, if necessary, seek expert advice.

### **Publication of your CIF in IUCr journals**

A basic structural check has been run on your CIF. These basic checks will be run on all CIFs submitted for publication in IUCr journals (*Acta Crystallographica*, *Journal of Applied Crystallography*, *Journal of Synchrotron Radiation*); however, if you intend to submit to *Acta Crystallographica Section C* or *E* or *IUCrData*, you should make sure that full publication checks are run on the final version of your CIF prior to submission.

### **Publication of your CIF in other journals**

Please refer to the *Notes for Authors* of the relevant journal for any special instructions relating to CIF submission.
