# Supplementary material for: Platinum(0)-η2-1,2-(E)ditosylethene Complexes Bearing Phosphine, Isocyanide and N-Heterocyclic Carbene Ligands: Synthesis and Cytotoxicity towards Ovarian and Breast Cancer Cells
Source: Molecules. 2024 Mar 1;29(5):1119. doi: 10.3390/molecules29051119 (PMC10934098; doi:10.3390/molecules29051119)
Supplement: Supplementary file 1 [file molecules-29-01119-s001.zip]

Archive with 13 entries (13 files):
- 2aLT.cif
- 2aLT_checkcif.pdf
- 2aRT.cif
- 2aRT_checkcif.pdf
- 3a.cif
- 3a_checkcif.pdf
- 3b.cif
- 3b_checkcif.pdf
- 4b.cif
- 4b_checkcif.pdf
- 6b.cif
- 6b_checkcif.pdf
- ESI.pdf
