# Supplementary material for: Platinum(0)-η2-1,2-(E)ditosylethene Complexes Bearing Phosphine, Isocyanide and N-Heterocyclic Carbene Ligands: Synthesis and Cytotoxicity towards Ovarian and Breast Cancer Cells
Source: Molecules. 2024 Mar 1;29(5):1119. doi: 10.3390/molecules29051119 (PMC10934098; doi:10.3390/molecules29051119)
Supplement: Supplementary file 1 [file molecules-29-01119-s001.zip › 2aLT.cif]

data_NC5LT

_publ_section_title
;
Platinum - trans-sulfone based organometallic complexes
;
 
_publ_contact_author_name        'Nicola Demitri'
_publ_contact_author_address     
;
Elettra-Sincrotrone Trieste, S.S. 14 Km 163.5 in Area Science Park, 
34149 Basovizza - Trieste, Italy.
;
_publ_contact_author_email       nicola.demitri@elettra.eu
_publ_contact_author_phone       '+39 040 375 8861'
loop_
_publ_author_name
_publ_author_address
'Demitri, Nicola'
;
Elettra-Sincrotrone Trieste, S.S. 14 Km 163.5 in Area Science Park, 
34149 Basovizza-Trieste, Italy.
;
'Visentin, Fabiano'
;
Dipartimento di Scienze Molecolari e Nanosistemi, Universita' Ca' Foscari,
Campus Scientifico - Via Torino 155, 30174 Venezia-Mestre, Italy.
;

_publ_section_abstract
;
The structure of NC5LT, PtC~52~H~46~O~4~P~2~S~2~ 1/4 C~4~H~10~O 1/4 CH~2Cl~2~,
at 100 K has triclinic (<i>P</i>-1) symmetry.
;
_publ_contact_letter 
;
Please consider this CIF for publication. I certify that this contibution is the
original work of those listed as authors; that it has not been published
before (in any language or medium) and is not being considered for publication
elsewhere; that all authors concur with and are aware of the submission; that
all workers involved in the study are listed as authors or given proper credit
in the acknowledgements; that I have obtained permission for and acknowledged
the source of any excerpts from other copyright works; and that to the best of
my knowledge the paper contains no statements which are libellous, unlawful or
in any way actionable. All coauthors have made significant scientific
contributions to the work reported, including the ideas and their execution,
and share responsibility and accountability for the results.
;

_audit_creation_method            'SHELXL-2019/3'
_shelx_SHELXL_version_number      '2019/3'
_chemical_name_systematic         ?
_chemical_name_common             ?
_chemical_melting_point           ?
_chemical_formula_moiety
 'C52 H46 O4 P2 Pt S2, 0.25 (C4 H10 O), 0.25 (C H2 Cl2)'
_chemical_formula_sum
 'C53.25 H48.75 Cl0.50 O4.25 P2 Pt S2'
_chemical_formula_weight          1095.54

loop_
 _atom_type_symbol
 _atom_type_description
 _atom_type_scat_dispersion_real
 _atom_type_scat_dispersion_imag
 _atom_type_scat_source
 'C'  'C'   0.0020   0.0012
 'International Tables Vol C Tables 4.2.6.8 and 6.1.1.4'
 'H'  'H'   0.0000   0.0000
 'International Tables Vol C Tables 4.2.6.8 and 6.1.1.4'
 'O'  'O'   0.0077   0.0045
 'International Tables Vol C Tables 4.2.6.8 and 6.1.1.4'
 'S'  'S'   0.0994   0.0945
 'International Tables Vol C Tables 4.2.6.8 and 6.1.1.4'
 'Pt'  'Pt'  -0.8479   6.7557
 'International Tables Vol C Tables 4.2.6.8 and 6.1.1.4'
 'P'  'P'   0.0809   0.0720
 'International Tables Vol C Tables 4.2.6.8 and 6.1.1.4'
 'Cl'  'Cl'   0.1198   0.1216
 'International Tables Vol C Tables 4.2.6.8 and 6.1.1.4'
 
_space_group_crystal_system       triclinic
_space_group_IT_number            2
_space_group_name_H-M_alt         'P -1'
_space_group_name_Hall            '-P 1'
 
_shelx_space_group_comment
;
The symmetry employed for this shelxl refinement is uniquely defined
by the following loop, which should always be used as a source of
symmetry information in preference to the above space-group names.
They are only intended as comments.
;
 
loop_
 _space_group_symop_operation_xyz
 'x, y, z'
 '-x, -y, -z'
 
_cell_length_a                    14.660(3)
_cell_length_b                    17.981(4)
_cell_length_c                    18.585(4)
_cell_angle_alpha                 101.57(3)
_cell_angle_beta                  96.12(3)
_cell_angle_gamma                 98.80(3)
_cell_volume                      4695.1(18)
_cell_formula_units_Z             4
_cell_measurement_temperature     100(2)
_cell_measurement_reflns_used     72055
_cell_measurement_theta_min       0.986
_cell_measurement_theta_max       31.129
 
_exptl_crystal_description        'Thin blocks'
_exptl_crystal_colour             'Colourless'
_exptl_crystal_density_meas       ?
_exptl_crystal_density_method     ?
_exptl_crystal_density_diffrn     1.550          
_exptl_crystal_F_000              2203
_exptl_transmission_factor_min    ?
_exptl_transmission_factor_max    ?
_exptl_crystal_size_max           0.100
_exptl_crystal_size_mid           0.050
_exptl_crystal_size_min           0.020
_exptl_absorpt_coefficient_mu     2.251
_shelx_estimated_absorpt_T_min    0.806
_shelx_estimated_absorpt_T_max    0.956
_exptl_absorpt_correction_type    none
_exptl_absorpt_correction_T_min   ?
_exptl_absorpt_correction_T_max   ?
_exptl_absorpt_process_details    ?
_exptl_absorpt_special_details    ?
_diffrn_ambient_temperature       100(2)
_diffrn_radiation_wavelength      0.620

_diffrn_measurement_method       'Rotating crystal'
_diffrn_radiation_type           Synchrotron
_diffrn_source                   'Elettra Synchrotron - XRD2 BL'
_diffrn_measurement_device_type  
;
'Arinax MD2s Goniometer, Pilatus 6M detector'
;
_diffrn_detector_area_resol_mean  ?
_diffrn_reflns_number             223791
_diffrn_reflns_av_unetI/netI      0.0361
_diffrn_reflns_av_R_equivalents   0.0645
_diffrn_reflns_limit_h_min        -23
_diffrn_reflns_limit_h_max        23
_diffrn_reflns_limit_k_min        -29
_diffrn_reflns_limit_k_max        29
_diffrn_reflns_limit_l_min        -30
_diffrn_reflns_limit_l_max        30
_diffrn_reflns_theta_min          0.986
_diffrn_reflns_theta_max          31.129
_diffrn_reflns_theta_full         21.839
_diffrn_measured_fraction_theta_max   0.908
_diffrn_measured_fraction_theta_full  0.999
_diffrn_reflns_Laue_measured_fraction_max    0.908
_diffrn_reflns_Laue_measured_fraction_full   0.999
_diffrn_reflns_point_group_measured_fraction_max   0.908
_diffrn_reflns_point_group_measured_fraction_full  0.999
_reflns_number_total              41421
_reflns_number_gt                 39404
_reflns_threshold_expression      'I > 2\s(I)'
_reflns_Friedel_coverage          0.000
_reflns_Friedel_fraction_max      .
_reflns_Friedel_fraction_full     .
 
_reflns_special_details
;
 Reflections were merged by SHELXL according to the crystal
 class for the calculation of statistics and refinement.
 
 _reflns_Friedel_fraction is defined as the number of unique
 Friedel pairs measured divided by the number that would be
 possible theoretically, ignoring centric projections and
 systematic absences.
;

_diffrn_standards_number 0
_diffrn_standards_interval_count 0
_diffrn_standards_decay_% 0
 
_computing_data_collection       'Elettra XRD2 Data Collection SW'
_computing_cell_refinement       'XDS (Kabsch, 2010)'
_computing_data_reduction        'XDS (Kabsch, 2010)'
_computing_structure_solution    'SHELXT (Sheldrick, 2015)'
_computing_structure_refinement 'SHELXL-2019/3 (Sheldrick, 2015)'
_computing_molecular_graphics    'Ortep3 for Windows - Coot'
_computing_publication_material  'enCIFer - publCIF'
 
_refine_special_details
;
Hydrogen atoms were included at calculated positions with isotropic 
Ufactors=1.2Ueq or Ufactors=1.5Ueq for methyl groups. Anisotropic thermal
motion modeling has been applied to all atoms. Thermal and geometrical
restrains have been applied to disordered residues.
;

_refine_ls_structure_factor_coef  Fsqd
_refine_ls_matrix_type            full
_refine_ls_weighting_scheme       calc
_refine_ls_weighting_details
'w=1/[\s^2^(Fo^2^)+(0.0211P)^2^+6.1021P] where P=(Fo^2^+2Fc^2^)/3'
_atom_sites_solution_primary      direct
_atom_sites_solution_secondary    difmap
_atom_sites_solution_hydrogens    geom
_refine_ls_hydrogen_treatment     constr
_refine_ls_extinction_method      'SHELXL-2018/3 (Sheldrick 2018)'
_refine_ls_extinction_coef        0.00749(11)
_refine_ls_extinction_expression
 'Fc^*^=kFc[1+0.001xFc^2^\l^3^/sin(2\q)]^-1/4^'
_refine_ls_number_reflns          41421
_refine_ls_number_parameters      1193
_refine_ls_number_restraints      190
_refine_ls_R_factor_all           0.0310
_refine_ls_R_factor_gt            0.0295
_refine_ls_wR_factor_ref          0.0737
_refine_ls_wR_factor_gt           0.0728
_refine_ls_goodness_of_fit_ref    1.050
_refine_ls_restrained_S_all       1.059
_refine_ls_shift/su_max           0.056
_refine_ls_shift/su_mean          0.001
 
loop_
 _atom_site_label
 _atom_site_type_symbol
 _atom_site_fract_x
 _atom_site_fract_y
 _atom_site_fract_z
 _atom_site_U_iso_or_equiv
 _atom_site_adp_type
 _atom_site_occupancy
 _atom_site_site_symmetry_order  
 _atom_site_calc_flag
 _atom_site_refinement_flags_posn
 _atom_site_refinement_flags_adp
 _atom_site_refinement_flags_occupancy
 _atom_site_disorder_assembly
 _atom_site_disorder_group
O1_91 O 0.2666(4) 0.4271(4) 0.1157(5) 0.109(2) Uani 0.600(6) 1 d D U P A 1
C1_91 C 0.3995(6) 0.4682(4) 0.0577(5) 0.058(3) Uani 0.600(6) 1 d D U P A 1
H1A_91 H 0.466218 0.489895 0.069117 0.087 Uiso 0.600(6) 1 calc R U P A 1
H1B_91 H 0.390239 0.417978 0.022860 0.087 Uiso 0.600(6) 1 calc R U P A 1
H1C_91 H 0.366528 0.503208 0.035226 0.087 Uiso 0.600(6) 1 calc R U P A 1
C2_91 C 0.3630(5) 0.4583(7) 0.1258(6) 0.091(2) Uani 0.600(6) 1 d D U P A 1
H2A_91 H 0.398048 0.423985 0.148611 0.109 Uiso 0.600(6) 1 calc R U P A 1
H2B_91 H 0.374374 0.509082 0.160958 0.109 Uiso 0.600(6) 1 calc R U P A 1
C3_91 C 0.2018(3) 0.4753(3) 0.1400(3) 0.0397(10) Uani 0.600(6) 1 d D U P A 1
H3A_91 H 0.222255 0.528016 0.132614 0.048 Uiso 0.600(6) 1 calc R U P A 1
H3B_91 H 0.198697 0.478709 0.193482 0.048 Uiso 0.600(6) 1 calc R U P A 1
C4_91 C 0.1114(5) 0.4427(5) 0.0976(5) 0.093(3) Uani 0.600(6) 1 d D U P A 1
H4A_91 H 0.066294 0.475260 0.113700 0.139 Uiso 0.600(6) 1 calc R U P A 1
H4B_91 H 0.114956 0.439869 0.044784 0.139 Uiso 0.600(6) 1 calc R U P A 1
H4A3_91 H 0.091472 0.390716 0.105461 0.139 Uiso 0.600(6) 1 calc R U P A 1
C1A_92 C 0.3774(8) 0.4577(13) 0.1411(8) 0.053(3) Uani 0.206(4) 1 d D U P B -2
H1A_92 H 0.412433 0.500311 0.181460 0.064 Uiso 0.206(4) 1 calc R U P B -2
H1B_92 H 0.398364 0.409404 0.147517 0.064 Uiso 0.206(4) 1 calc R U P B -2
Cl1A_92 Cl 0.4013(5) 0.4761(5) 0.0550(4) 0.087(3) Uani 0.206(4) 1 d D U P B -2
Cl2A_92 Cl 0.2575(3) 0.4493(3) 0.1468(3) 0.0534(13) Uani 0.206(4) 1 d D U P B -2
C1B_92 C 0.2582(10) 0.4845(10) 0.074(2) 0.074(3) Uani 0.143(3) 1 d D U P C -3
H1C_92 H 0.261381 0.515473 0.035968 0.089 Uiso 0.143(3) 1 calc R U P C -3
H1D_92 H 0.252003 0.518940 0.121613 0.089 Uiso 0.143(3) 1 calc R U P C -3
Cl1B_92 Cl 0.3609(6) 0.4472(4) 0.0851(3) 0.0586(17) Uani 0.143(3) 1 d D U P C -3
Cl2B_92 Cl 0.1600(8) 0.4103(6) 0.0483(6) 0.103(3) Uani 0.143(3) 1 d D U P C -3
Pt_11 Pt 0.96787(2) 0.28076(2) 0.70264(2) 0.01762(2) Uani 1 1 d . . . . .
C9_12 C 0.6538(3) 0.3784(2) 1.0792(2) 0.0557(9) Uani 1 1 d . . . . .
H9A_12 H 0.626750 0.423194 1.071364 0.084 Uiso 1 1 calc R U . . .
H9B_12 H 0.681924 0.387326 1.131169 0.084 Uiso 1 1 calc R U . . .
H9C_12 H 0.604774 0.332394 1.067428 0.084 Uiso 1 1 calc R U . . .
C8_12 C 0.78311(10) 0.28932(7) 0.92689(7) 0.0308(4) Uani 1 1 d G . . . .
H8_12 H 0.775105 0.243568 0.889215 0.037 Uiso 1 1 calc R U . . .
C7_12 C 0.71639(9) 0.29943(8) 0.97407(9) 0.0297(4) Uani 1 1 d G . . . .
H7_12 H 0.662779 0.260593 0.968639 0.036 Uiso 1 1 calc R U . . .
C6_12 C 0.72811(11) 0.36637(9) 1.02919(9) 0.0365(5) Uani 1 1 d G . . . .
C5_12 C 0.80655(14) 0.42319(9) 1.03713(10) 0.0596(10) Uani 1 1 d G . . . .
H5_12 H 0.814558 0.468943 1.074799 0.071 Uiso 1 1 calc R U . . .
C4_12 C 0.87327(11) 0.41308(9) 0.98995(10) 0.0528(9) Uani 1 1 d G . . . .
H4_12 H 0.926884 0.451920 0.995375 0.063 Uiso 1 1 calc R U . . .
C3_12 C 0.86156(9) 0.34614(9) 0.93483(8) 0.0288(4) Uani 1 1 d G . . . .
S1_12 S 0.94752(4) 0.33409(4) 0.87538(3) 0.02962(10) Uani 1 1 d . . . . .
O1_12 O 1.01787(14) 0.40308(14) 0.89681(11) 0.0470(5) Uani 1 1 d . . . . .
O2_12 O 0.97498(13) 0.26125(12) 0.87866(9) 0.0371(4) Uani 1 1 d . . . . .
C1_12 C 0.89345(14) 0.32775(13) 0.78502(11) 0.0258(4) Uani 1 1 d . . . . .
H1_12 H 0.864749 0.372852 0.776640 0.031 Uiso 1 1 calc R U . . .
C2_12 C 0.84448(12) 0.25209(13) 0.74363(10) 0.0233(3) Uani 1 1 d . . . . .
H2_12 H 0.841520 0.209452 0.771023 0.028 Uiso 1 1 calc R U . . .
S2_12 S 0.74522(3) 0.25036(4) 0.68103(3) 0.03102(11) Uani 1 1 d . . . . .
O4_12 O 0.72866(12) 0.17982(14) 0.62554(9) 0.0414(5) Uani 1 1 d . . . . .
O3_12 O 0.75346(12) 0.32298(14) 0.65808(12) 0.0461(5) Uani 1 1 d . . . . .
C16_12 C 0.4457(2) 0.2307(2) 0.88048(18) 0.0469(7) Uani 1 1 d . . . . .
H16A_12 H 0.405516 0.269069 0.877179 0.070 Uiso 1 1 calc R U . . .
H16B_12 H 0.478107 0.240264 0.931281 0.070 Uiso 1 1 calc R U . . .
H16C_12 H 0.407669 0.178898 0.867292 0.070 Uiso 1 1 calc R U . . .
C15_12 C 0.60890(10) 0.17462(7) 0.74185(8) 0.0321(4) Uani 1 1 d G . . . .
H15_12 H 0.624997 0.128850 0.714951 0.039 Uiso 1 1 calc R U . . .
C14_12 C 0.54053(10) 0.16991(7) 0.78795(10) 0.0348(5) Uani 1 1 d G . . . .
H14_12 H 0.509900 0.120919 0.792555 0.042 Uiso 1 1 calc R U . . .
C13_12 C 0.51697(10) 0.23688(9) 0.82730(9) 0.0360(5) Uani 1 1 d G . . . .
C12_12 C 0.56178(12) 0.30857(8) 0.82056(11) 0.0490(8) Uani 1 1 d G . . . .
H12_12 H 0.545683 0.354338 0.847455 0.059 Uiso 1 1 calc R U . . .
C11_12 C 0.63015(11) 0.31328(7) 0.77446(11) 0.0438(7) Uani 1 1 d G . . . .
H11_12 H 0.660779 0.362271 0.769851 0.053 Uiso 1 1 calc R U . . .
C10_12 C 0.65371(9) 0.24631(9) 0.73511(8) 0.0281(4) Uani 1 1 d G . . . .
P_13 P 0.98780(3) 0.17285(3) 0.62113(2) 0.01832(7) Uani 1 1 d . . . . .
C18_13 C 1.09832(7) 0.05761(6) 0.62542(7) 0.0238(3) Uani 1 1 d G . . . .
H18_13 H 1.045215 0.022378 0.597963 0.029 Uiso 1 1 calc R U . . .
C17_13 C 1.17970(9) 0.03110(5) 0.64485(7) 0.0271(4) Uani 1 1 d G . . . .
H17_13 H 1.182217 -0.022249 0.630668 0.032 Uiso 1 1 calc R U . . .
C16_13 C 1.25740(7) 0.08265(7) 0.68503(8) 0.0272(4) Uani 1 1 d G . . . .
H16_13 H 1.313020 0.064528 0.698310 0.033 Uiso 1 1 calc R U . . .
C15_13 C 1.25372(7) 0.16070(6) 0.70579(8) 0.0275(4) Uani 1 1 d G . . . .
H15_13 H 1.306824 0.195933 0.733248 0.033 Uiso 1 1 calc R U . . .
C14_13 C 1.17234(8) 0.18721(5) 0.68636(7) 0.0225(3) Uani 1 1 d G . . . .
H14_13 H 1.169823 0.240562 0.700544 0.027 Uiso 1 1 calc R U . . .
C13_13 C 1.09464(6) 0.13567(6) 0.64618(7) 0.0186(3) Uani 1 1 d G . . . .
C7_13 C 0.89850(8) 0.08920(7) 0.61987(6) 0.0222(3) Uani 1 1 d G . . . .
C8_13 C 0.84606(10) 0.04421(8) 0.55465(5) 0.0273(4) Uani 1 1 d G . . . .
H8_13 H 0.855598 0.056627 0.508369 0.033 Uiso 1 1 calc R U . . .
C9_13 C 0.77965(11) -0.01894(8) 0.55715(7) 0.0383(6) Uani 1 1 d G . . . .
H9_13 H 0.743814 -0.049692 0.512581 0.046 Uiso 1 1 calc R U . . .
C10_13 C 0.76569(10) -0.03711(9) 0.62487(8) 0.0428(6) Uani 1 1 d G . . . .
H10_13 H 0.720311 -0.080273 0.626585 0.051 Uiso 1 1 calc R U . . .
C11_13 C 0.81813(10) 0.00788(9) 0.69009(6) 0.0336(5) Uani 1 1 d G . . . .
H11_13 H 0.808591 -0.004536 0.736377 0.040 Uiso 1 1 calc R U . . .
C12_13 C 0.88454(9) 0.07104(8) 0.68759(5) 0.0263(4) Uani 1 1 d G . . . .
H12_13 H 0.920375 0.101783 0.732166 0.032 Uiso 1 1 calc R U . . .
C1_13 C 0.98597(10) 0.17442(9) 0.52290(5) 0.0272(4) Uani 1 1 d G . . . .
C2_13 C 0.91900(11) 0.20976(10) 0.49121(8) 0.0409(6) Uani 1 1 d G . . . .
H2_13 H 0.877006 0.232443 0.520578 0.049 Uiso 1 1 calc R U . . .
C3_13 C 0.91347(14) 0.21190(11) 0.41654(9) 0.0592(10) Uani 1 1 d G . . . .
H3_13 H 0.867696 0.236046 0.394881 0.071 Uiso 1 1 calc R U . . .
C4_13 C 0.97491(15) 0.17870(12) 0.37356(6) 0.0638(12) Uani 1 1 d G . . . .
H4_13 H 0.971126 0.180165 0.322532 0.077 Uiso 1 1 calc R U . . .
C5_13 C 1.04187(13) 0.14337(12) 0.40525(7) 0.0534(9) Uani 1 1 d G . . . .
H5_13 H 1.083865 0.120680 0.375880 0.064 Uiso 1 1 calc R U . . .
C6_13 C 1.04741(10) 0.14123(10) 0.47992(7) 0.0396(6) Uani 1 1 d G . . . .
H6_13 H 1.093177 0.117076 0.501578 0.047 Uiso 1 1 calc R U . . .
P_14 P 1.08032(3) 0.37918(3) 0.69179(2) 0.01779(7) Uani 1 1 d . . . . .
C18A_14 C 1.1468(2) 0.32294(16) 0.56078(19) 0.0204(8) Uani 0.489(6) 1 d G . P D 1
H18A_14 H 1.164565 0.284573 0.585095 0.024 Uiso 0.489(6) 1 calc R U P D 1
C17A_14 C 1.1622(2) 0.32088(15) 0.48793(19) 0.0206(9) Uani 0.489(6) 1 d G . P D 1
H17A_14 H 1.190337 0.281113 0.462456 0.025 Uiso 0.489(6) 1 calc R U P D 1
C16A_14 C 1.1362(2) 0.37702(19) 0.45235(14) 0.0224(10) Uani 0.489(6) 1 d G . P D 1
H16A_14 H 1.146687 0.375612 0.402562 0.027 Uiso 0.489(6) 1 calc R U P D 1
C15A_14 C 1.0950(3) 0.43521(19) 0.48962(16) 0.0254(10) Uani 0.489(6) 1 d G . P D 1
H15A_14 H 1.077266 0.473571 0.465307 0.030 Uiso 0.489(6) 1 calc R U P D 1
C14A_14 C 1.0797(2) 0.43726(18) 0.56247(15) 0.0226(9) Uani 0.489(6) 1 d G . P D 1
H14A_14 H 1.051493 0.477031 0.587946 0.027 Uiso 0.489(6) 1 calc R U P D 1
C13A_14 C 1.1056(2) 0.38113(18) 0.59805(13) 0.0148(14) Uani 0.489(6) 1 d G . P D 1
C18B_14 C 1.1789(3) 0.3372(2) 0.5726(2) 0.0319(12) Uani 0.511(6) 1 d G . P D 2
H18B_14 H 1.217883 0.318875 0.606779 0.038 Uiso 0.511(6) 1 calc R U P D 2
C17B_14 C 1.1929(3) 0.3264(2) 0.4987(2) 0.0380(15) Uani 0.511(6) 1 d G . P D 2
H17B_14 H 1.241387 0.300619 0.482333 0.046 Uiso 0.511(6) 1 calc R U P D 2
C16B_14 C 1.1359(3) 0.3532(2) 0.44868(16) 0.0380(16) Uani 0.511(6) 1 d G . P D 2
H16B_14 H 1.145435 0.345786 0.398157 0.046 Uiso 0.511(6) 1 calc R U P D 2
C15B_14 C 1.0649(2) 0.3909(3) 0.47260(14) 0.0369(12) Uani 0.511(6) 1 d G . P D 2
H15B_14 H 1.025979 0.409210 0.438426 0.044 Uiso 0.511(6) 1 calc R U P D 2
C14B_14 C 1.0510(2) 0.4017(3) 0.54652(16) 0.0306(10) Uani 0.511(6) 1 d G . P D 2
H14B_14 H 1.002474 0.427466 0.562872 0.037 Uiso 0.511(6) 1 calc R U P D 2
C13B_14 C 1.1080(2) 0.3749(2) 0.59653(14) 0.0278(19) Uani 0.511(6) 1 d G . P D 2
C7_14 C 1.03863(9) 0.47052(6) 0.71786(8) 0.0241(3) Uani 1 1 d G . . . .
C8_14 C 1.09711(9) 0.53684(9) 0.75954(11) 0.0450(7) Uani 1 1 d G . . . .
H8_14 H 1.159454 0.534811 0.777968 0.054 Uiso 1 1 calc R U . . .
C9_14 C 1.06436(12) 0.60614(7) 0.77427(13) 0.0634(11) Uani 1 1 d G . . . .
H9_14 H 1.104327 0.651465 0.802757 0.076 Uiso 1 1 calc R U . . .
C10_14 C 0.97314(12) 0.60911(7) 0.74731(12) 0.0531(8) Uani 1 1 d G . . . .
H10_14 H 0.950756 0.656474 0.757372 0.064 Uiso 1 1 calc R U . . .
C11_14 C 0.91466(9) 0.54279(9) 0.70562(10) 0.0359(5) Uani 1 1 d G . . . .
H11_14 H 0.852311 0.544829 0.687197 0.043 Uiso 1 1 calc R U . . .
C12_14 C 0.94740(8) 0.47350(7) 0.69090(8) 0.0267(4) Uani 1 1 d G . . . .
H12_14 H 0.907435 0.428173 0.662408 0.032 Uiso 1 1 calc R U . . .
C1_14 C 1.19407(7) 0.39508(8) 0.74852(6) 0.0215(3) Uani 1 1 d G . . . .
C2_14 C 1.19812(8) 0.36813(8) 0.81365(7) 0.0271(4) Uani 1 1 d G . . . .
H2_14 H 1.143151 0.341894 0.826722 0.033 Uiso 1 1 calc R U . . .
C3_14 C 1.28259(10) 0.37957(10) 0.85964(7) 0.0350(5) Uani 1 1 d G . . . .
H3_14 H 1.285353 0.361155 0.904145 0.042 Uiso 1 1 calc R U . . .
C4_14 C 1.36301(8) 0.41797(11) 0.84050(8) 0.0409(6) Uani 1 1 d G . . . .
H4_14 H 1.420745 0.425786 0.871936 0.049 Uiso 1 1 calc R U . . .
C5_14 C 1.35897(7) 0.44492(10) 0.77538(9) 0.0404(5) Uani 1 1 d G . . . .
H5_14 H 1.413936 0.471158 0.762305 0.048 Uiso 1 1 calc R U . . .
C6_14 C 1.27450(9) 0.43348(9) 0.72939(7) 0.0315(4) Uani 1 1 d G . . . .
H6_14 H 1.271734 0.451898 0.684880 0.038 Uiso 1 1 calc R U . . .
Pt_21 Pt 0.44040(2) 0.22499(2) 0.25495(2) 0.01615(2) Uani 1 1 d . . . . .
C9_22 C -0.09381(17) 0.11491(19) -0.02193(14) 0.0414(6) Uani 1 1 d . . . . .
H9A_22 H -0.149750 0.133237 -0.006319 0.062 Uiso 1 1 calc R U . . .
H9B_22 H -0.106384 0.058424 -0.036327 0.062 Uiso 1 1 calc R U . . .
H9C_22 H -0.076753 0.136035 -0.064320 0.062 Uiso 1 1 calc R U . . .
C8_22 C 0.08325(10) 0.11451(6) 0.14300(8) 0.0341(5) Uani 1 1 d G . . . .
H8_22 H 0.101229 0.079139 0.171132 0.041 Uiso 1 1 calc R U . . .
C7_22 C 0.01233(10) 0.08959(6) 0.08308(9) 0.0390(6) Uani 1 1 d G . . . .
H7_22 H -0.018160 0.037201 0.070258 0.047 Uiso 1 1 calc R U . . .
C6_22 C -0.01398(9) 0.14134(8) 0.04193(7) 0.0301(4) Uani 1 1 d G . . . .
C5_22 C 0.03063(10) 0.21800(8) 0.06069(7) 0.0319(4) Uani 1 1 d G . . . .
H5_22 H 0.012644 0.253367 0.032563 0.038 Uiso 1 1 calc R U . . .
C4_22 C 0.10154(9) 0.24291(6) 0.12061(7) 0.0282(4) Uani 1 1 d G . . . .
H4_22 H 0.132032 0.295307 0.133437 0.034 Uiso 1 1 calc R U . . .
C3_22 C 0.12786(8) 0.19117(7) 0.16177(6) 0.0199(3) Uani 1 1 d G . . . .
S1_22 S 0.21661(3) 0.22353(2) 0.23923(2) 0.01669(7) Uani 1 1 d . . . . .
O1_22 O 0.19511(10) 0.29155(9) 0.28477(8) 0.0264(3) Uani 1 1 d . . . . .
O2_22 O 0.22481(10) 0.15772(9) 0.27123(8) 0.0251(3) Uani 1 1 d . . . . .
C1_22 C 0.31828(11) 0.25039(10) 0.20237(9) 0.0169(3) Uani 1 1 d . . . . .
H1_22 H 0.324653 0.300420 0.186042 0.020 Uiso 1 1 calc R U . . .
C2_22 C 0.35162(12) 0.18781(10) 0.15618(9) 0.0180(3) Uani 1 1 d . . . . .
H2_22 H 0.312281 0.135575 0.148945 0.022 Uiso 1 1 calc R U . . .
S2_22 S 0.39987(3) 0.20723(3) 0.07831(2) 0.02114(8) Uani 1 1 d . . . . .
O4_22 O 0.46907(11) 0.15982(12) 0.06304(8) 0.0329(4) Uani 1 1 d . . . . .
O3_22 O 0.42773(12) 0.28949(10) 0.08788(9) 0.0318(3) Uani 1 1 d . . . . .
C16_22 C 0.07716(19) 0.0924(2) -0.16927(14) 0.0508(8) Uani 1 1 d . . . . .
H16A_22 H 0.033313 0.128534 -0.164751 0.076 Uiso 1 1 calc R U . . .
H16B_22 H 0.045328 0.041298 -0.166191 0.076 Uiso 1 1 calc R U . . .
H16C_22 H 0.100411 0.088999 -0.217129 0.076 Uiso 1 1 calc R U . . .
C15_22 C 0.28715(10) 0.09666(7) -0.02936(8) 0.0315(4) Uani 1 1 d G . . . .
H15_22 H 0.324566 0.061998 -0.014845 0.038 Uiso 1 1 calc R U . . .
C14_22 C 0.21250(11) 0.06980(7) -0.08614(8) 0.0391(5) Uani 1 1 d G . . . .
H14_22 H 0.198895 0.016783 -0.110441 0.047 Uiso 1 1 calc R U . . .
C13_22 C 0.15776(9) 0.12052(9) -0.10737(7) 0.0345(5) Uani 1 1 d G . . . .
C12_22 C 0.17767(9) 0.19810(8) -0.07181(8) 0.0324(4) Uani 1 1 d G . . . .
H12_22 H 0.140259 0.232758 -0.086324 0.039 Uiso 1 1 calc R U . . .
C11_22 C 0.25232(9) 0.22495(6) -0.01503(7) 0.0274(4) Uani 1 1 d G . . . .
H11_22 H 0.265929 0.277974 0.009272 0.033 Uiso 1 1 calc R U . . .
C10_22 C 0.30706(8) 0.17424(7) 0.00620(6) 0.0207(3) Uani 1 1 d G . . . .
P_23 P 0.53240(3) 0.13279(3) 0.24710(2) 0.01695(7) Uani 1 1 d . . . . .
C18_23 C 0.51615(9) 0.02985(8) 0.34373(7) 0.0325(4) Uani 1 1 d G . . . .
H18_23 H 0.468821 -0.002194 0.306768 0.039 Uiso 1 1 calc R U . . .
C17_23 C 0.53956(11) 0.00763(9) 0.40976(9) 0.0415(6) Uani 1 1 d G . . . .
H17_23 H 0.508234 -0.039607 0.417918 0.050 Uiso 1 1 calc R U . . .
C16_23 C 0.60881(12) 0.05451(10) 0.46384(6) 0.0402(6) Uani 1 1 d G . . . .
H16_23 H 0.624807 0.039323 0.508965 0.048 Uiso 1 1 calc R U . . .
C15_23 C 0.65464(11) 0.12362(9) 0.45190(6) 0.0394(6) Uani 1 1 d G . . . .
H15_23 H 0.701969 0.155665 0.488863 0.047 Uiso 1 1 calc R U . . .
C14_23 C 0.63123(10) 0.14585(7) 0.38587(7) 0.0317(4) Uani 1 1 d G . . . .
H14_23 H 0.662558 0.193079 0.377713 0.038 Uiso 1 1 calc R U . . .
C13_23 C 0.56198(9) 0.09896(7) 0.33179(5) 0.0211(3) Uani 1 1 d G . . . .
C7_23 C 0.46788(7) 0.04542(6) 0.18144(6) 0.0191(3) Uani 1 1 d G . . . .
C8_23 C 0.50538(6) 0.00892(7) 0.12123(7) 0.0234(3) Uani 1 1 d G . . . .
H8_23 H 0.568180 0.026204 0.115462 0.028 Uiso 1 1 calc R U . . .
C9_23 C 0.45100(9) -0.05286(7) 0.06946(6) 0.0281(4) Uani 1 1 d G . . . .
H9_23 H 0.476631 -0.077809 0.028310 0.034 Uiso 1 1 calc R U . . .
C10_23 C 0.35912(8) -0.07815(7) 0.07790(7) 0.0297(4) Uani 1 1 d G . . . .
H10_23 H 0.321952 -0.120379 0.042521 0.036 Uiso 1 1 calc R U . . .
C11_23 C 0.32162(6) -0.04165(7) 0.13812(7) 0.0272(4) Uani 1 1 d G . . . .
H11_23 H 0.258822 -0.058935 0.143884 0.033 Uiso 1 1 calc R U . . .
C12_23 C 0.37600(7) 0.02013(7) 0.18989(6) 0.0219(3) Uani 1 1 d G . . . .
H12_23 H 0.350370 0.045078 0.231037 0.026 Uiso 1 1 calc R U . . .
C1_23 C 0.64550(7) 0.14970(8) 0.21439(7) 0.0224(3) Uani 1 1 d G . . . .
C2_23 C 0.66086(9) 0.20345(9) 0.17068(8) 0.0352(5) Uani 1 1 d G . . . .
H2_23 H 0.612845 0.230451 0.157942 0.042 Uiso 1 1 calc R U . . .
C3_23 C 0.74648(10) 0.21768(11) 0.14562(9) 0.0470(7) Uani 1 1 d G . . . .
H3_23 H 0.756975 0.254420 0.115752 0.056 Uiso 1 1 calc R U . . .
C4_23 C 0.81673(7) 0.17817(11) 0.16427(9) 0.0436(7) Uani 1 1 d G . . . .
H4_23 H 0.875244 0.187904 0.147138 0.052 Uiso 1 1 calc R U . . .
C5_23 C 0.80137(8) 0.12442(9) 0.20797(9) 0.0362(5) Uani 1 1 d G . . . .
H5_23 H 0.849386 0.097420 0.220715 0.043 Uiso 1 1 calc R U . . .
C6_23 C 0.71575(9) 0.11019(8) 0.23303(8) 0.0274(4) Uani 1 1 d G . . . .
H6_23 H 0.705257 0.073450 0.262906 0.033 Uiso 1 1 calc R U . . .
PA_24 P 0.4979(3) 0.3179(2) 0.3674(2) 0.0145(4) Uani 0.4975(19) 1 d . . P E 1
C18A_24 C 0.66710(15) 0.33724(14) 0.46458(11) 0.0188(6) Uani 0.4975(19) 1 d G . P E 1
H18A_24 H 0.630228 0.327960 0.501988 0.023 Uiso 0.4975(19) 1 calc R U P E 1
C17A_24 C 0.76380(15) 0.35173(15) 0.48054(11) 0.0230(7) Uani 0.4975(19) 1 d G . P E 1
H17A_24 H 0.793029 0.352358 0.528861 0.028 Uiso 0.4975(19) 1 calc R U P E 1
C16A_24 C 0.81775(13) 0.36530(17) 0.42580(16) 0.0265(7) Uani 0.4975(19) 1 d G . P E 1
H16A_24 H 0.883846 0.375205 0.436714 0.032 Uiso 0.4975(19) 1 calc R U P E 1
C15A_24 C 0.77499(19) 0.36438(19) 0.35510(14) 0.0249(11) Uani 0.4975(19) 1 d G . P E 1
H15A_24 H 0.811862 0.373655 0.317694 0.030 Uiso 0.4975(19) 1 calc R U P E 1
C14A_24 C 0.6783(2) 0.34989(19) 0.33914(11) 0.0187(8) Uani 0.4975(19) 1 d G . P E 1
H14A_24 H 0.649061 0.349256 0.290820 0.022 Uiso 0.4975(19) 1 calc R U P E 1
C13A_24 C 0.62434(13) 0.33631(16) 0.39388(13) 0.0163(6) Uani 0.4975(19) 1 d G . P E 1
C7A_24 C 0.47375(17) 0.41646(10) 0.36606(15) 0.0213(6) Uani 0.4975(19) 1 d G . P E 1
C8A_24 C 0.38219(15) 0.42385(12) 0.34538(18) 0.0313(9) Uani 0.4975(19) 1 d G . P E 1
H8A_24 H 0.334194 0.379578 0.333149 0.038 Uiso 0.4975(19) 1 calc R U P E 1
C9A_24 C 0.36086(15) 0.49602(15) 0.34260(19) 0.0373(12) Uani 0.4975(19) 1 d G . P E 1
H9A_24 H 0.298281 0.501069 0.328466 0.045 Uiso 0.4975(19) 1 calc R U P E 1
C10A_24 C 0.4311(2) 0.56080(12) 0.36049(17) 0.0308(9) Uani 0.4975(19) 1 d G . P E 1
H10A_24 H 0.416507 0.610124 0.358593 0.037 Uiso 0.4975(19) 1 calc R U P E 1
C11A_24 C 0.52265(17) 0.55341(11) 0.38117(16) 0.0281(8) Uani 0.4975(19) 1 d G . P E 1
H11A_24 H 0.570648 0.597688 0.393402 0.034 Uiso 0.4975(19) 1 calc R U P E 1
C12A_24 C 0.54398(13) 0.48125(13) 0.38395(15) 0.0230(6) Uani 0.4975(19) 1 d G . P E 1
H12A_24 H 0.606564 0.476198 0.398086 0.028 Uiso 0.4975(19) 1 calc R U P E 1
C1A_24 C 0.45578(15) 0.26745(14) 0.44342(11) 0.0148(6) Uani 0.4975(19) 1 d G . P E 1
C2A_24 C 0.36301(13) 0.23724(14) 0.44478(11) 0.0196(6) Uani 0.4975(19) 1 d G . P E 1
H2A_24 H 0.316525 0.238573 0.405556 0.024 Uiso 0.4975(19) 1 calc R U P E 1
C3A_24 C 0.33827(13) 0.20506(15) 0.50353(14) 0.0228(6) Uani 0.4975(19) 1 d G . P E 1
H3A_24 H 0.274865 0.184412 0.504453 0.027 Uiso 0.4975(19) 1 calc R U P E 1
C4A_24 C 0.40629(17) 0.20311(16) 0.56091(12) 0.0255(7) Uani 0.4975(19) 1 d G . P E 1
H4A_24 H 0.389373 0.181116 0.601065 0.031 Uiso 0.4975(19) 1 calc R U P E 1
C5A_24 C 0.49905(15) 0.23332(17) 0.55956(12) 0.0289(8) Uani 0.4975(19) 1 d G . P E 1
H5A_24 H 0.545540 0.231982 0.598781 0.035 Uiso 0.4975(19) 1 calc R U P E 1
C6A_24 C 0.52380(12) 0.26549(15) 0.50081(13) 0.0229(6) Uani 0.4975(19) 1 d G . P E 1
H6A_24 H 0.587202 0.286144 0.499884 0.027 Uiso 0.4975(19) 1 calc R U P E 1
PB_24 P 0.4826(3) 0.3059(2) 0.3628(3) 0.0148(4) Uani 0.5025(19) 1 d . . P E 2
C18B_24 C 0.63265(17) 0.41404(16) 0.44830(16) 0.0286(8) Uani 0.5025(19) 1 d G . P E 2
H18B_24 H 0.588118 0.430784 0.478500 0.034 Uiso 0.5025(19) 1 calc R U P E 2
C17B_24 C 0.72571(19) 0.44963(16) 0.46626(18) 0.0408(12) Uani 0.5025(19) 1 d G . P E 2
H17B_24 H 0.744776 0.490690 0.508740 0.049 Uiso 0.5025(19) 1 calc R U P E 2
C16B_24 C 0.79087(15) 0.42513(19) 0.4221(2) 0.0413(12) Uani 0.5025(19) 1 d G . P E 2
H16B_24 H 0.854475 0.449452 0.434345 0.050 Uiso 0.5025(19) 1 calc R U P E 2
C15B_24 C 0.7630(2) 0.3650(2) 0.3599(2) 0.0403(19) Uani 0.5025(19) 1 d G . P E 2
H15B_24 H 0.807517 0.348307 0.329709 0.048 Uiso 0.5025(19) 1 calc R U P E 2
C14B_24 C 0.6699(2) 0.32946(16) 0.34195(16) 0.0244(10) Uani 0.5025(19) 1 d G . P E 2
H14B_24 H 0.650860 0.288399 0.299468 0.029 Uiso 0.5025(19) 1 calc R U P E 2
C13B_24 C 0.60476(15) 0.35396(15) 0.38614(17) 0.0176(7) Uani 0.5025(19) 1 d G . P E 2
C7B_24 C 0.42519(16) 0.38950(10) 0.36476(12) 0.0158(5) Uani 0.5025(19) 1 d G . P E 2
C8B_24 C 0.37825(17) 0.41878(12) 0.42219(10) 0.0199(6) Uani 0.5025(19) 1 d G . P E 2
H8B_24 H 0.372839 0.394017 0.462532 0.024 Uiso 0.5025(19) 1 calc R U P E 2
C9B_24 C 0.33923(17) 0.48429(13) 0.42060(12) 0.0234(7) Uani 0.5025(19) 1 d G . P E 2
H9B_24 H 0.307153 0.504298 0.459858 0.028 Uiso 0.5025(19) 1 calc R U P E 2
C10B_24 C 0.34715(18) 0.52052(11) 0.36158(14) 0.0239(7) Uani 0.5025(19) 1 d G . P E 2
H10B_24 H 0.320486 0.565293 0.360495 0.029 Uiso 0.5025(19) 1 calc R U P E 2
C11B_24 C 0.39409(19) 0.49125(13) 0.30414(12) 0.0258(7) Uani 0.5025(19) 1 d G . P E 2
H11B_24 H 0.399505 0.516009 0.263804 0.031 Uiso 0.5025(19) 1 calc R U P E 2
C12B_24 C 0.43311(17) 0.42574(13) 0.30573(11) 0.0222(6) Uani 0.5025(19) 1 d G . P E 2
H12B_24 H 0.465192 0.405729 0.266477 0.027 Uiso 0.5025(19) 1 calc R U P E 2
C1B_24 C 0.4552(2) 0.29722(15) 0.45136(11) 0.0202(7) Uani 0.5025(19) 1 d G . P E 2
C2B_24 C 0.4533(2) 0.35601(13) 0.51219(15) 0.0328(9) Uani 0.5025(19) 1 d G . P E 2
H2B_24 H 0.466328 0.408353 0.508330 0.039 Uiso 0.5025(19) 1 calc R U P E 2
C3B_24 C 0.4325(3) 0.33821(18) 0.57868(13) 0.0467(15) Uani 0.5025(19) 1 d G . P E 2
H3B_24 H 0.431214 0.378389 0.620255 0.056 Uiso 0.5025(19) 1 calc R U P E 2
C4B_24 C 0.4135(3) 0.2616(2) 0.58433(13) 0.0513(17) Uani 0.5025(19) 1 d G . P E 2
H4B_24 H 0.399210 0.249460 0.629770 0.062 Uiso 0.5025(19) 1 calc R U P E 2
C5B_24 C 0.4153(3) 0.20284(15) 0.52350(17) 0.0434(13) Uani 0.5025(19) 1 d G . P E 2
H5B_24 H 0.402321 0.150494 0.527360 0.052 Uiso 0.5025(19) 1 calc R U P E 2
C6B_24 C 0.4362(2) 0.22064(14) 0.45701(13) 0.0285(8) Uani 0.5025(19) 1 d G . P E 2
H6B_24 H 0.437435 0.180458 0.415434 0.034 Uiso 0.5025(19) 1 calc R U P E 2
 
loop_
 _atom_site_aniso_label
 _atom_site_aniso_U_11
 _atom_site_aniso_U_22
 _atom_site_aniso_U_33
 _atom_site_aniso_U_23
 _atom_site_aniso_U_13
 _atom_site_aniso_U_12
O1_91 0.093(4) 0.088(4) 0.125(4) 0.001(3) -0.009(4) -0.006(3)
C1_91 0.060(4) 0.052(4) 0.052(4) -0.021(3) 0.003(3) 0.025(4)
C2_91 0.078(4) 0.075(4) 0.111(5) -0.002(4) 0.016(4) 0.011(4)
C3_91 0.045(2) 0.0354(19) 0.041(2) 0.0147(16) 0.0051(17) 0.0068(16)
C4_91 0.128(7) 0.080(5) 0.104(6) 0.059(5) 0.054(5) 0.045(5)
C1A_92 0.062(5) 0.043(4) 0.065(5) 0.030(4) -0.004(5) 0.024(4)
Cl1A_92 0.091(4) 0.084(4) 0.065(3) 0.045(3) -0.040(3) -0.050(3)
Cl2A_92 0.049(2) 0.056(2) 0.051(2) 0.0205(18) 0.0006(16) -0.0120(17)
C1B_92 0.075(5) 0.064(5) 0.079(5) 0.015(5) 0.000(5) 0.008(5)
Cl1B_92 0.084(4) 0.073(4) 0.030(2) 0.013(2) 0.024(2) 0.038(3)
Cl2B_92 0.144(7) 0.071(5) 0.089(6) 0.027(4) -0.011(5) 0.013(5)
Pt_11 0.01413(3) 0.02592(3) 0.01748(3) 0.01128(2) 0.00650(2) 0.00649(2)
C9_12 0.0597(19) 0.0516(16) 0.0615(19) 0.0061(14) 0.0456(17) 0.0104(14)
C8_12 0.0385(11) 0.0313(9) 0.0290(9) 0.0110(8) 0.0170(8) 0.0121(8)
C7_12 0.0314(10) 0.0336(10) 0.0309(9) 0.0138(8) 0.0159(8) 0.0102(8)
C6_12 0.0391(12) 0.0399(12) 0.0345(11) 0.0078(9) 0.0224(9) 0.0080(9)
C5_12 0.0612(19) 0.0550(17) 0.0498(16) -0.0156(14) 0.0378(15) -0.0138(14)
C4_12 0.0458(15) 0.0582(17) 0.0407(14) -0.0130(13) 0.0250(12) -0.0141(13)
C3_12 0.0259(9) 0.0414(11) 0.0228(8) 0.0088(8) 0.0104(7) 0.0106(8)
S1_12 0.0222(2) 0.0479(3) 0.0225(2) 0.0092(2) 0.00933(16) 0.0113(2)
O1_12 0.0306(9) 0.0676(14) 0.0362(9) -0.0008(9) 0.0158(7) -0.0031(9)
O2_12 0.0349(8) 0.0633(12) 0.0243(7) 0.0179(7) 0.0088(6) 0.0292(8)
C1_12 0.0224(8) 0.0390(10) 0.0247(8) 0.0159(7) 0.0126(6) 0.0144(7)
C2_12 0.0156(7) 0.0396(10) 0.0224(7) 0.0184(7) 0.0075(6) 0.0102(6)
S2_12 0.01555(18) 0.0606(3) 0.0279(2) 0.0292(2) 0.00781(16) 0.0119(2)
O4_12 0.0216(7) 0.0825(15) 0.0218(7) 0.0133(8) 0.0030(5) 0.0118(8)
O3_12 0.0231(7) 0.0804(14) 0.0554(11) 0.0563(11) 0.0114(7) 0.0146(8)
C16_12 0.0325(12) 0.0717(19) 0.0538(16) 0.0332(15) 0.0273(12) 0.0220(12)
C15_12 0.0245(9) 0.0425(11) 0.0350(10) 0.0167(9) 0.0125(8) 0.0066(8)
C14_12 0.0262(9) 0.0457(12) 0.0406(12) 0.0225(10) 0.0148(9) 0.0070(9)
C13_12 0.0237(9) 0.0555(14) 0.0445(12) 0.0308(11) 0.0186(9) 0.0195(9)
C12_12 0.0391(13) 0.0481(14) 0.081(2) 0.0328(15) 0.0379(14) 0.0272(12)
C11_12 0.0335(11) 0.0442(13) 0.0740(19) 0.0373(14) 0.0302(12) 0.0221(10)
C10_12 0.0162(7) 0.0454(11) 0.0337(9) 0.0258(9) 0.0102(7) 0.0120(7)
P_13 0.01417(17) 0.0265(2) 0.01468(16) 0.00766(15) 0.00192(13) 0.00092(14)
C18_13 0.0261(8) 0.0257(8) 0.0175(7) 0.0015(6) 0.0005(6) 0.0038(6)
C17_13 0.0325(10) 0.0277(8) 0.0215(8) 0.0037(7) 0.0025(7) 0.0105(7)
C16_13 0.0232(8) 0.0347(9) 0.0271(9) 0.0105(7) 0.0034(7) 0.0107(7)
C15_13 0.0182(7) 0.0313(9) 0.0320(9) 0.0079(7) -0.0011(7) 0.0035(6)
C14_13 0.0179(7) 0.0240(7) 0.0240(8) 0.0040(6) 0.0003(6) 0.0028(6)
C13_13 0.0166(6) 0.0250(7) 0.0136(6) 0.0030(5) 0.0034(5) 0.0032(5)
C7_13 0.0160(7) 0.0307(8) 0.0206(7) 0.0120(6) 0.0001(5) -0.0006(6)
C8_13 0.0233(8) 0.0330(9) 0.0236(8) 0.0125(7) -0.0037(6) -0.0045(7)
C9_13 0.0299(10) 0.0438(12) 0.0360(11) 0.0202(10) -0.0113(9) -0.0132(9)
C10_13 0.0300(11) 0.0507(14) 0.0452(13) 0.0290(12) -0.0070(10) -0.0167(10)
C11_13 0.0238(9) 0.0473(12) 0.0324(10) 0.0242(9) 0.0015(7) -0.0036(8)
C12_13 0.0195(7) 0.0381(10) 0.0231(8) 0.0162(7) 0.0010(6) 0.0000(7)
C1_13 0.0256(8) 0.0360(10) 0.0159(7) 0.0104(7) -0.0027(6) -0.0094(7)
C2_13 0.0459(14) 0.0445(13) 0.0305(11) 0.0210(10) -0.0098(10) -0.0042(10)
C3_13 0.081(2) 0.0535(17) 0.0347(13) 0.0267(13) -0.0245(15) -0.0128(16)
C4_13 0.096(3) 0.0612(18) 0.0164(9) 0.0166(11) -0.0116(13) -0.0368(18)
C5_13 0.0624(18) 0.0686(19) 0.0156(8) 0.0045(10) 0.0069(10) -0.0253(15)
C6_13 0.0354(11) 0.0623(16) 0.0147(7) 0.0071(9) 0.0047(7) -0.0094(11)
P_14 0.01876(18) 0.01919(17) 0.01739(17) 0.00488(14) 0.00693(14) 0.00535(14)
C18A_14 0.026(2) 0.0181(17) 0.0214(17) 0.0082(14) 0.0092(15) 0.0072(15)
C17A_14 0.025(2) 0.0199(17) 0.0207(17) 0.0058(14) 0.0119(15) 0.0083(15)
C16A_14 0.0247(19) 0.028(2) 0.0178(18) 0.0090(15) 0.0060(14) 0.0062(16)
C15A_14 0.035(2) 0.027(2) 0.0216(16) 0.0127(15) 0.0114(15) 0.0136(17)
C14A_14 0.030(2) 0.0245(19) 0.0197(16) 0.0103(14) 0.0096(14) 0.0120(16)
C13A_14 0.013(2) 0.018(2) 0.015(3) -0.0010(18) 0.009(2) 0.0055(19)
C18B_14 0.044(3) 0.0250(19) 0.030(2) 0.0048(17) 0.022(2) 0.005(2)
C17B_14 0.046(4) 0.035(2) 0.031(3) -0.0006(19) 0.024(3) -0.005(2)
C16B_14 0.044(3) 0.039(3) 0.021(2) -0.0086(19) 0.0169(19) -0.013(2)
C15B_14 0.040(2) 0.047(3) 0.0174(16) -0.0002(17) 0.0055(15) -0.004(2)
C14B_14 0.0258(18) 0.040(2) 0.0201(16) -0.0020(16) 0.0063(13) -0.0044(17)
C13B_14 0.038(4) 0.020(2) 0.023(4) 0.009(2) 0.005(3) -0.008(2)
C7_14 0.0253(8) 0.0249(8) 0.0229(8) 0.0016(6) 0.0034(6) 0.0111(6)
C8_14 0.0381(12) 0.0319(11) 0.0541(15) -0.0156(11) -0.0121(11) 0.0192(10)
C9_14 0.0578(19) 0.0373(13) 0.079(2) -0.0243(15) -0.0200(17) 0.0276(13)
C10_14 0.0557(17) 0.0427(14) 0.0591(18) -0.0072(13) -0.0004(14) 0.0339(13)
C11_14 0.0342(11) 0.0452(12) 0.0351(11) 0.0104(9) 0.0078(9) 0.0245(10)
C12_14 0.0256(8) 0.0333(9) 0.0250(8) 0.0083(7) 0.0057(7) 0.0131(7)
C1_14 0.0201(7) 0.0229(7) 0.0230(7) 0.0043(6) 0.0064(6) 0.0071(6)
C2_14 0.0259(9) 0.0328(9) 0.0228(8) 0.0062(7) 0.0024(7) 0.0064(7)
C3_14 0.0336(11) 0.0424(12) 0.0288(10) 0.0070(9) -0.0021(8) 0.0121(9)
C4_14 0.0239(10) 0.0535(15) 0.0428(13) 0.0030(11) -0.0021(9) 0.0134(10)
C5_14 0.0202(9) 0.0534(15) 0.0467(14) 0.0075(11) 0.0071(9) 0.0071(9)
C6_14 0.0209(8) 0.0404(11) 0.0357(10) 0.0099(9) 0.0098(7) 0.0069(8)
Pt_21 0.01275(3) 0.02411(3) 0.01421(3) 0.00762(2) 0.00310(2) 0.00603(2)
C9_22 0.0252(10) 0.0644(17) 0.0278(10) 0.0001(10) -0.0072(8) 0.0081(10)
C8_22 0.0285(10) 0.0267(9) 0.0417(12) 0.0028(8) -0.0108(9) 0.0057(7)
C7_22 0.0293(10) 0.0328(10) 0.0453(13) -0.0034(9) -0.0139(9) 0.0052(8)
C6_22 0.0181(8) 0.0486(12) 0.0210(8) 0.0002(8) 0.0004(6) 0.0099(8)
C5_22 0.0242(9) 0.0502(13) 0.0231(8) 0.0156(8) -0.0004(7) 0.0051(8)
C4_22 0.0247(8) 0.0374(10) 0.0226(8) 0.0122(7) -0.0011(7) 0.0020(7)
C3_22 0.0144(6) 0.0286(8) 0.0166(6) 0.0029(6) 0.0024(5) 0.0065(5)
S1_22 0.01470(15) 0.02249(17) 0.01345(14) 0.00343(13) 0.00301(12) 0.00506(13)
O1_22 0.0241(6) 0.0326(7) 0.0205(6) -0.0039(5) 0.0070(5) 0.0091(5)
O2_22 0.0220(6) 0.0311(7) 0.0246(6) 0.0145(5) 0.0018(5) 0.0023(5)
C1_22 0.0150(6) 0.0227(7) 0.0147(6) 0.0055(5) 0.0027(5) 0.0060(5)
C2_22 0.0157(6) 0.0257(7) 0.0148(6) 0.0061(5) 0.0036(5) 0.0078(5)
S2_22 0.01848(17) 0.0321(2) 0.01464(16) 0.00636(15) 0.00496(13) 0.00684(15)
O4_22 0.0230(7) 0.0592(11) 0.0210(6) 0.0071(7) 0.0075(5) 0.0205(7)
O3_22 0.0347(8) 0.0350(8) 0.0237(7) 0.0081(6) 0.0078(6) -0.0048(6)
C16_22 0.0306(12) 0.094(2) 0.0205(9) 0.0079(12) -0.0040(8) -0.0015(13)
C15_22 0.0298(10) 0.0334(10) 0.0288(9) 0.0001(8) -0.0029(7) 0.0120(8)
C14_22 0.0356(12) 0.0446(13) 0.0291(10) -0.0068(9) -0.0023(9) 0.0073(10)
C13_22 0.0226(9) 0.0637(15) 0.0164(7) 0.0088(9) 0.0028(6) 0.0057(9)
C12_22 0.0256(9) 0.0528(13) 0.0247(9) 0.0177(9) 0.0016(7) 0.0142(9)
C11_22 0.0266(9) 0.0359(10) 0.0240(8) 0.0120(7) 0.0032(7) 0.0124(7)
C10_22 0.0205(7) 0.0303(8) 0.0142(6) 0.0068(6) 0.0041(5) 0.0103(6)
P_23 0.01392(16) 0.02572(19) 0.01343(16) 0.00574(14) 0.00325(13) 0.00758(14)
C18_23 0.0252(9) 0.0497(13) 0.0289(9) 0.0238(9) 0.0057(7) 0.0049(8)
C17_23 0.0343(11) 0.0659(17) 0.0384(12) 0.0374(13) 0.0126(9) 0.0134(11)
C16_23 0.0420(13) 0.0689(17) 0.0243(9) 0.0255(11) 0.0110(9) 0.0304(12)
C15_23 0.0520(15) 0.0507(14) 0.0179(8) 0.0059(9) -0.0041(8) 0.0253(12)
C14_23 0.0474(13) 0.0308(9) 0.0167(7) 0.0035(7) -0.0048(8) 0.0156(9)
C13_23 0.0229(7) 0.0295(8) 0.0153(6) 0.0077(6) 0.0046(5) 0.0137(6)
C7_23 0.0165(6) 0.0252(7) 0.0173(6) 0.0058(6) 0.0044(5) 0.0062(5)
C8_23 0.0232(8) 0.0278(8) 0.0199(7) 0.0030(6) 0.0072(6) 0.0068(6)
C9_23 0.0320(10) 0.0286(9) 0.0229(8) 0.0011(7) 0.0059(7) 0.0077(7)
C10_23 0.0309(10) 0.0257(8) 0.0285(9) 0.0001(7) -0.0010(7) 0.0047(7)
C11_23 0.0202(8) 0.0284(8) 0.0315(9) 0.0044(7) 0.0016(7) 0.0040(6)
C12_23 0.0169(7) 0.0272(8) 0.0228(7) 0.0061(6) 0.0043(6) 0.0058(6)
C1_23 0.0146(6) 0.0361(9) 0.0167(7) 0.0045(6) 0.0038(5) 0.0064(6)
C2_23 0.0185(8) 0.0678(16) 0.0255(9) 0.0237(10) 0.0067(7) 0.0064(9)
C3_23 0.0239(10) 0.092(2) 0.0301(11) 0.0268(13) 0.0103(8) 0.0019(12)
C4_23 0.0193(9) 0.078(2) 0.0291(10) 0.0019(11) 0.0105(8) 0.0034(10)
C5_23 0.0177(8) 0.0512(13) 0.0337(10) -0.0080(10) 0.0056(7) 0.0098(8)
C6_23 0.0180(7) 0.0340(9) 0.0293(9) 0.0002(7) 0.0039(6) 0.0099(7)
PA_24 0.0140(11) 0.0174(11) 0.0098(5) -0.0015(7) 0.0020(7) 0.0012(7)
C18A_24 0.0220(14) 0.0181(13) 0.0142(12) 0.0008(10) 0.0007(10) 0.0020(11)
C17A_24 0.0215(15) 0.0221(14) 0.0219(15) 0.0007(12) -0.0044(12) 0.0041(12)
C16A_24 0.0170(14) 0.0248(16) 0.036(2) 0.0047(14) 0.0005(13) 0.0017(12)
C15A_24 0.0162(16) 0.027(3) 0.032(2) 0.008(2) 0.0024(16) 0.0012(15)
C14A_24 0.0222(17) 0.019(2) 0.0160(15) 0.0048(12) 0.0064(12) 0.0026(14)
C13A_24 0.0178(15) 0.0145(14) 0.0160(14) 0.0025(11) 0.0019(11) 0.0017(11)
C7A_24 0.0219(16) 0.0205(14) 0.0191(14) -0.0028(11) 0.0011(11) 0.0068(13)
C8A_24 0.0223(17) 0.0263(17) 0.038(2) -0.0086(16) -0.0034(15) 0.0075(13)
C9A_24 0.034(2) 0.026(2) 0.045(3) -0.0088(19) -0.010(2) 0.0159(18)
C10A_24 0.041(2) 0.0254(17) 0.0243(17) -0.0003(14) -0.0022(16) 0.0143(16)
C11A_24 0.036(2) 0.0224(16) 0.0257(17) 0.0046(13) 0.0038(15) 0.0068(14)
C12A_24 0.0244(16) 0.0207(14) 0.0233(15) 0.0044(12) 0.0017(12) 0.0040(12)
C1A_24 0.0187(13) 0.0110(13) 0.0148(13) 0.0022(11) 0.0034(10) 0.0035(12)
C2A_24 0.0184(14) 0.0212(14) 0.0190(13) 0.0055(11) 0.0031(11) 0.0010(11)
C3A_24 0.0231(15) 0.0219(14) 0.0252(16) 0.0091(12) 0.0066(12) 0.0020(12)
C4A_24 0.0325(19) 0.0260(17) 0.0217(16) 0.0111(14) 0.0063(14) 0.0067(14)
C5A_24 0.0284(18) 0.039(2) 0.0227(16) 0.0149(15) -0.0001(14) 0.0075(15)
C6A_24 0.0210(15) 0.0285(16) 0.0191(14) 0.0071(12) -0.0002(11) 0.0036(12)
PB_24 0.0119(10) 0.0152(10) 0.0172(8) 0.0028(7) 0.0025(7) 0.0025(7)
C18B_24 0.0202(16) 0.0255(16) 0.0321(19) -0.0044(14) -0.0016(13) -0.0021(12)
C17B_24 0.026(2) 0.031(2) 0.055(3) 0.000(2) -0.0090(19) -0.0069(16)
C16B_24 0.0178(17) 0.030(2) 0.072(4) 0.014(2) -0.0004(19) -0.0067(14)
C15B_24 0.026(2) 0.035(4) 0.067(5) 0.020(3) 0.022(3) 0.003(2)
C14B_24 0.0216(18) 0.016(2) 0.037(2) 0.0073(15) 0.0070(15) 0.0026(14)
C13B_24 0.0153(15) 0.0151(15) 0.0202(15) 0.0017(12) 0.0019(11) -0.0003(11)
C7B_24 0.0148(13) 0.0132(11) 0.0184(13) 0.0013(10) 0.0017(10) 0.0031(10)
C8B_24 0.0237(15) 0.0172(12) 0.0199(13) 0.0027(11) 0.0062(11) 0.0063(11)
C9B_24 0.0237(16) 0.0192(14) 0.0273(16) 0.0009(12) 0.0067(13) 0.0072(12)
C10B_24 0.0236(16) 0.0144(15) 0.0324(19) 0.0029(13) -0.0008(14) 0.0060(12)
C11B_24 0.0299(18) 0.0220(15) 0.0287(18) 0.0088(13) 0.0065(15) 0.0087(13)
C12B_24 0.0255(16) 0.0185(13) 0.0249(15) 0.0057(12) 0.0073(12) 0.0071(11)
C1B_24 0.0173(14) 0.0274(19) 0.0122(13) 0.0002(14) 0.0030(10) -0.0027(14)
C2B_24 0.0303(19) 0.039(2) 0.0197(15) -0.0089(15) 0.0101(14) -0.0078(16)
C3B_24 0.043(3) 0.065(3) 0.0178(17) -0.0093(19) 0.0131(17) -0.016(2)
C4B_24 0.046(3) 0.080(4) 0.0191(18) 0.009(2) 0.0103(18) -0.019(3)
C5B_24 0.049(3) 0.052(3) 0.026(2) 0.014(2) 0.010(2) -0.011(2)
C6B_24 0.0285(18) 0.0338(19) 0.0192(15) 0.0034(14) 0.0066(13) -0.0050(15)
 
_geom_special_details
;
 All esds (except the esd in the dihedral angle between two l.s. planes)
 are estimated using the full covariance matrix.  The cell esds are taken
 into account individually in the estimation of esds in distances, angles
 and torsion angles; correlations between esds in cell parameters are only
 used when they are defined by crystal symmetry.  An approximate (isotropic)
 treatment of cell esds is used for estimating esds involving l.s. planes.
;
 
loop_
 _geom_bond_atom_site_label_1
 _geom_bond_atom_site_label_2
 _geom_bond_distance
 _geom_bond_site_symmetry_2
 _geom_bond_publ_flag
O1_91 C2_91 1.417(6) . ?
O1_91 C3_91 1.430(6) . ?
C1_91 C2_91 1.458(7) . ?
C1_91 H1A_91 0.9800 . ?
C1_91 H1B_91 0.9800 . ?
C1_91 H1C_91 0.9800 . ?
C2_91 H2A_91 0.9900 . ?
C2_91 H2B_91 0.9900 . ?
C3_91 C4_91 1.441(6) . ?
C3_91 H3A_91 0.9900 . ?
C3_91 H3B_91 0.9900 . ?
C4_91 H4A_91 0.9800 . ?
C4_91 H4B_91 0.9800 . ?
C4_91 H4A3_91 0.9800 . ?
C1A_92 Cl1A_92 1.757(9) . ?
C1A_92 Cl2A_92 1.758(9) . ?
C1A_92 H1A_92 0.9900 . ?
C1A_92 H1B_92 0.9900 . ?
C1B_92 Cl1B_92 1.747(13) . ?
C1B_92 Cl2B_92 1.758(13) . ?
C1B_92 H1C_92 0.9900 . ?
C1B_92 H1D_92 0.9900 . ?
Pt_11 C2_12 2.0699(19) . ?
Pt_11 C1_12 2.090(2) . ?
Pt_11 P_14 2.2830(9) . ?
Pt_11 P_13 2.2877(9) . ?
C9_12 C6_12 1.518(3) . ?
C9_12 H9A_12 0.9800 . ?
C9_12 H9B_12 0.9800 . ?
C9_12 H9C_12 0.9800 . ?
C8_12 C7_12 1.3900 . ?
C8_12 C3_12 1.3900 . ?
C8_12 H8_12 0.9500 . ?
C7_12 C6_12 1.3900 . ?
C7_12 H7_12 0.9500 . ?
C6_12 C5_12 1.3900 . ?
C5_12 C4_12 1.3900 . ?
C5_12 H5_12 0.9500 . ?
C4_12 C3_12 1.3900 . ?
C4_12 H4_12 0.9500 . ?
C3_12 S1_12 1.7721(12) . ?
S1_12 O2_12 1.439(2) . ?
S1_12 O1_12 1.444(2) . ?
S1_12 C1_12 1.753(2) . ?
C1_12 C2_12 1.457(3) . ?
C1_12 H1_12 1.0000 . ?
C2_12 S2_12 1.7557(19) . ?
C2_12 H2_12 1.0000 . ?
S2_12 O4_12 1.435(2) . ?
S2_12 O3_12 1.445(2) . ?
S2_12 C10_12 1.7612(12) . ?
C16_12 C13_12 1.519(3) . ?
C16_12 H16A_12 0.9800 . ?
C16_12 H16B_12 0.9800 . ?
C16_12 H16C_12 0.9800 . ?
C15_12 C14_12 1.3900 . ?
C15_12 C10_12 1.3900 . ?
C15_12 H15_12 0.9500 . ?
C14_12 C13_12 1.3900 . ?
C14_12 H14_12 0.9500 . ?
C13_12 C12_12 1.3900 . ?
C12_12 C11_12 1.3900 . ?
C12_12 H12_12 0.9500 . ?
C11_12 C10_12 1.3900 . ?
C11_12 H11_12 0.9500 . ?
P_13 C1_13 1.8289(11) . ?
P_13 C7_13 1.8314 . ?
P_13 C13_13 1.8457 . ?
C18_13 C17_13 1.3900 . ?
C18_13 C13_13 1.3900 . ?
C18_13 H18_13 0.9500 . ?
C17_13 C16_13 1.3900 . ?
C17_13 H17_13 0.9500 . ?
C16_13 C15_13 1.3900 . ?
C16_13 H16_13 0.9500 . ?
C15_13 C14_13 1.3900 . ?
C15_13 H15_13 0.9500 . ?
C14_13 C13_13 1.3900 . ?
C14_13 H14_13 0.9500 . ?
C7_13 C8_13 1.3900 . ?
C7_13 C12_13 1.3900 . ?
C8_13 C9_13 1.3900 . ?
C8_13 H8_13 0.9500 . ?
C9_13 C10_13 1.3900 . ?
C9_13 H9_13 0.9500 . ?
C10_13 C11_13 1.3900 . ?
C10_13 H10_13 0.9500 . ?
C11_13 C12_13 1.3900 . ?
C11_13 H11_13 0.9500 . ?
C12_13 H12_13 0.9500 . ?
C1_13 C2_13 1.3900 . ?
C1_13 C6_13 1.3900 . ?
C2_13 C3_13 1.3900 . ?
C2_13 H2_13 0.9500 . ?
C3_13 C4_13 1.3900 . ?
C3_13 H3_13 0.9500 . ?
C4_13 C5_13 1.3900 . ?
C4_13 H4_13 0.9500 . ?
C5_13 C6_13 1.3900 . ?
C5_13 H5_13 0.9500 . ?
C6_13 H6_13 0.9500 . ?
P_14 C13A_14 1.825(2) . ?
P_14 C1_14 1.8255(12) . ?
P_14 C7_14 1.8322(11) . ?
P_14 C13B_14 1.847(3) . ?
C18A_14 C17A_14 1.3900 . ?
C18A_14 C13A_14 1.3900 . ?
C18A_14 H18A_14 0.9500 . ?
C17A_14 C16A_14 1.3900 . ?
C17A_14 H17A_14 0.9500 . ?
C16A_14 C15A_14 1.3900 . ?
C16A_14 H16A_14 0.9500 . ?
C15A_14 C14A_14 1.3900 . ?
C15A_14 H15A_14 0.9500 . ?
C14A_14 C13A_14 1.3900 . ?
C14A_14 H14A_14 0.9500 . ?
C18B_14 C17B_14 1.3900 . ?
C18B_14 C13B_14 1.3900 . ?
C18B_14 H18B_14 0.9500 . ?
C17B_14 C16B_14 1.3900 . ?
C17B_14 H17B_14 0.9500 . ?
C16B_14 C15B_14 1.3900 . ?
C16B_14 H16B_14 0.9500 . ?
C15B_14 C14B_14 1.3900 . ?
C15B_14 H15B_14 0.9500 . ?
C14B_14 C13B_14 1.3900 . ?
C14B_14 H14B_14 0.9500 . ?
C7_14 C8_14 1.3900 . ?
C7_14 C12_14 1.3900 . ?
C8_14 C9_14 1.3900 . ?
C8_14 H8_14 0.9500 . ?
C9_14 C10_14 1.3900 . ?
C9_14 H9_14 0.9500 . ?
C10_14 C11_14 1.3900 . ?
C10_14 H10_14 0.9500 . ?
C11_14 C12_14 1.3900 . ?
C11_14 H11_14 0.9500 . ?
C12_14 H12_14 0.9500 . ?
C1_14 C2_14 1.3900 . ?
C1_14 C6_14 1.3900 . ?
C2_14 C3_14 1.3900 . ?
C2_14 H2_14 0.9500 . ?
C3_14 C4_14 1.3900 . ?
C3_14 H3_14 0.9500 . ?
C4_14 C5_14 1.3900 . ?
C4_14 H4_14 0.9500 . ?
C5_14 C6_14 1.3900 . ?
C5_14 H5_14 0.9500 . ?
C6_14 H6_14 0.9500 . ?
Pt_21 C2_22 2.0597(18) . ?
Pt_21 C1_22 2.1035(16) . ?
Pt_21 PB_24 2.192(4) . ?
Pt_21 P_23 2.2844(7) . ?
Pt_21 PA_24 2.379(4) . ?
C9_22 C6_22 1.520(2) . ?
C9_22 H9A_22 0.9800 . ?
C9_22 H9B_22 0.9800 . ?
C9_22 H9C_22 0.9800 . ?
C8_22 C7_22 1.3900 . ?
C8_22 C3_22 1.3900 . ?
C8_22 H8_22 0.9500 . ?
C7_22 C6_22 1.3900 . ?
C7_22 H7_22 0.9500 . ?
C6_22 C5_22 1.3900 . ?
C5_22 C4_22 1.3900 . ?
C5_22 H5_22 0.9500 . ?
C4_22 C3_22 1.3900 . ?
C4_22 H4_22 0.9500 . ?
C3_22 S1_22 1.7711 . ?
S1_22 O1_22 1.4391(15) . ?
S1_22 O2_22 1.4418(15) . ?
S1_22 C1_22 1.7478(18) . ?
C1_22 C2_22 1.453(2) . ?
C1_22 H1_22 1.0000 . ?
C2_22 S2_22 1.7500(18) . ?
C2_22 H2_22 1.0000 . ?
S2_22 O4_22 1.4372(16) . ?
S2_22 O3_22 1.4424(18) . ?
S2_22 C10_22 1.7447 . ?
C16_22 C13_22 1.506(3) . ?
C16_22 H16A_22 0.9800 . ?
C16_22 H16B_22 0.9800 . ?
C16_22 H16C_22 0.9800 . ?
C15_22 C14_22 1.3900 . ?
C15_22 C10_22 1.3900 . ?
C15_22 H15_22 0.9500 . ?
C14_22 C13_22 1.3900 . ?
C14_22 H14_22 0.9500 . ?
C13_22 C12_22 1.3900 . ?
C12_22 C11_22 1.3900 . ?
C12_22 H12_22 0.9500 . ?
C11_22 C10_22 1.3900 . ?
C11_22 H11_22 0.9500 . ?
P_23 C1_23 1.8292 . ?
P_23 C13_23 1.8315 . ?
P_23 C7_23 1.8389 . ?
C18_23 C17_23 1.3900 . ?
C18_23 C13_23 1.3900 . ?
C18_23 H18_23 0.9500 . ?
C17_23 C16_23 1.3900 . ?
C17_23 H17_23 0.9500 . ?
C16_23 C15_23 1.3900 . ?
C16_23 H16_23 0.9500 . ?
C15_23 C14_23 1.3900 . ?
C15_23 H15_23 0.9500 . ?
C14_23 C13_23 1.3900 . ?
C14_23 H14_23 0.9500 . ?
C7_23 C8_23 1.3900 . ?
C7_23 C12_23 1.3900 . ?
C8_23 C9_23 1.3900 . ?
C8_23 H8_23 0.9500 . ?
C9_23 C10_23 1.3900 . ?
C9_23 H9_23 0.9500 . ?
C10_23 C11_23 1.3900 . ?
C10_23 H10_23 0.9500 . ?
C11_23 C12_23 1.3900 . ?
C11_23 H11_23 0.9500 . ?
C12_23 H12_23 0.9500 . ?
C1_23 C2_23 1.3900 . ?
C1_23 C6_23 1.3900 . ?
C2_23 C3_23 1.3900 . ?
C2_23 H2_23 0.9500 . ?
C3_23 C4_23 1.3900 . ?
C3_23 H3_23 0.9500 . ?
C4_23 C5_23 1.3900 . ?
C4_23 H4_23 0.9500 . ?
C5_23 C6_23 1.3900 . ?
C5_23 H5_23 0.9500 . ?
C6_23 H6_23 0.9500 . ?
PA_24 C13A_24 1.827(4) . ?
PA_24 C7A_24 1.864(5) . ?
PA_24 C1A_24 1.932(5) . ?
C18A_24 C17A_24 1.3900 . ?
C18A_24 C13A_24 1.3900 . ?
C18A_24 H18A_24 0.9500 . ?
C17A_24 C16A_24 1.3900 . ?
C17A_24 H17A_24 0.9500 . ?
C16A_24 C15A_24 1.3900 . ?
C16A_24 H16A_24 0.9500 . ?
C15A_24 C14A_24 1.3900 . ?
C15A_24 H15A_24 0.9500 . ?
C14A_24 C13A_24 1.3900 . ?
C14A_24 H14A_24 0.9500 . ?
C7A_24 C8A_24 1.3900 . ?
C7A_24 C12A_24 1.3900 . ?
C8A_24 C9A_24 1.3900 . ?
C8A_24 H8A_24 0.9500 . ?
C9A_24 C10A_24 1.3900 . ?
C9A_24 H9A_24 0.9500 . ?
C10A_24 C11A_24 1.3900 . ?
C10A_24 H10A_24 0.9500 . ?
C11A_24 C12A_24 1.3900 . ?
C11A_24 H11A_24 0.9500 . ?
C12A_24 H12A_24 0.9500 . ?
C1A_24 C2A_24 1.3900 . ?
C1A_24 C6A_24 1.3900 . ?
C2A_24 C3A_24 1.3900 . ?
C2A_24 H2A_24 0.9500 . ?
C3A_24 C4A_24 1.3900 . ?
C3A_24 H3A_24 0.9500 . ?
C4A_24 C5A_24 1.3900 . ?
C4A_24 H4A_24 0.9500 . ?
C5A_24 C6A_24 1.3900 . ?
C5A_24 H5A_24 0.9500 . ?
C6A_24 H6A_24 0.9500 . ?
PB_24 C1B_24 1.767(5) . ?
PB_24 C7B_24 1.829(5) . ?
PB_24 C13B_24 1.831(4) . ?
C18B_24 C17B_24 1.3900 . ?
C18B_24 C13B_24 1.3900 . ?
C18B_24 H18B_24 0.9500 . ?
C17B_24 C16B_24 1.3900 . ?
C17B_24 H17B_24 0.9500 . ?
C16B_24 C15B_24 1.3900 . ?
C16B_24 H16B_24 0.9500 . ?
C15B_24 C14B_24 1.3900 . ?
C15B_24 H15B_24 0.9500 . ?
C14B_24 C13B_24 1.3900 . ?
C14B_24 H14B_24 0.9500 . ?
C7B_24 C8B_24 1.3900 . ?
C7B_24 C12B_24 1.3900 . ?
C8B_24 C9B_24 1.3900 . ?
C8B_24 H8B_24 0.9500 . ?
C9B_24 C10B_24 1.3900 . ?
C9B_24 H9B_24 0.9500 . ?
C10B_24 C11B_24 1.3900 . ?
C10B_24 H10B_24 0.9500 . ?
C11B_24 C12B_24 1.3900 . ?
C11B_24 H11B_24 0.9500 . ?
C12B_24 H12B_24 0.9500 . ?
C1B_24 C2B_24 1.3900 . ?
C1B_24 C6B_24 1.3900 . ?
C2B_24 C3B_24 1.3900 . ?
C2B_24 H2B_24 0.9500 . ?
C3B_24 C4B_24 1.3900 . ?
C3B_24 H3B_24 0.9500 . ?
C4B_24 C5B_24 1.3900 . ?
C4B_24 H4B_24 0.9500 . ?
C5B_24 C6B_24 1.3900 . ?
C5B_24 H5B_24 0.9500 . ?
C6B_24 H6B_24 0.9500 . ?
 
loop_
 _geom_angle_atom_site_label_1
 _geom_angle_atom_site_label_2
 _geom_angle_atom_site_label_3
 _geom_angle
 _geom_angle_site_symmetry_1
 _geom_angle_site_symmetry_3
 _geom_angle_publ_flag
C2_91 O1_91 C3_91 119.9(7) . . ?
C2_91 C1_91 H1A_91 109.5 . . ?
C2_91 C1_91 H1B_91 109.5 . . ?
H1A_91 C1_91 H1B_91 109.5 . . ?
C2_91 C1_91 H1C_91 109.5 . . ?
H1A_91 C1_91 H1C_91 109.5 . . ?
H1B_91 C1_91 H1C_91 109.5 . . ?
O1_91 C2_91 C1_91 114.3(7) . . ?
O1_91 C2_91 H2A_91 108.7 . . ?
C1_91 C2_91 H2A_91 108.7 . . ?
O1_91 C2_91 H2B_91 108.7 . . ?
C1_91 C2_91 H2B_91 108.7 . . ?
H2A_91 C2_91 H2B_91 107.6 . . ?
O1_91 C3_91 C4_91 108.6(5) . . ?
O1_91 C3_91 H3A_91 110.0 . . ?
C4_91 C3_91 H3A_91 110.0 . . ?
O1_91 C3_91 H3B_91 110.0 . . ?
C4_91 C3_91 H3B_91 110.0 . . ?
H3A_91 C3_91 H3B_91 108.3 . . ?
C3_91 C4_91 H4A_91 109.5 . . ?
C3_91 C4_91 H4B_91 109.5 . . ?
H4A_91 C4_91 H4B_91 109.5 . . ?
C3_91 C4_91 H4A3_91 109.5 . . ?
H4A_91 C4_91 H4A3_91 109.5 . . ?
H4B_91 C4_91 H4A3_91 109.5 . . ?
Cl1A_92 C1A_92 Cl2A_92 110.8(6) . . ?
Cl1A_92 C1A_92 H1A_92 109.5 . . ?
Cl2A_92 C1A_92 H1A_92 109.5 . . ?
Cl1A_92 C1A_92 H1B_92 109.5 . . ?
Cl2A_92 C1A_92 H1B_92 109.5 . . ?
H1A_92 C1A_92 H1B_92 108.1 . . ?
Cl1B_92 C1B_92 Cl2B_92 111.3(10) . . ?
Cl1B_92 C1B_92 H1C_92 109.4 . . ?
Cl2B_92 C1B_92 H1C_92 109.4 . . ?
Cl1B_92 C1B_92 H1D_92 109.4 . . ?
Cl2B_92 C1B_92 H1D_92 109.4 . . ?
H1C_92 C1B_92 H1D_92 108.0 . . ?
C2_12 Pt_11 C1_12 40.99(9) . . ?
C2_12 Pt_11 P_14 145.46(6) . . ?
C1_12 Pt_11 P_14 106.21(7) . . ?
C2_12 Pt_11 P_13 106.85(7) . . ?
C1_12 Pt_11 P_13 147.02(7) . . ?
P_14 Pt_11 P_13 106.74(3) . . ?
C6_12 C9_12 H9A_12 109.5 . . ?
C6_12 C9_12 H9B_12 109.5 . . ?
H9A_12 C9_12 H9B_12 109.5 . . ?
C6_12 C9_12 H9C_12 109.5 . . ?
H9A_12 C9_12 H9C_12 109.5 . . ?
H9B_12 C9_12 H9C_12 109.5 . . ?
C7_12 C8_12 C3_12 120.0 . . ?
C7_12 C8_12 H8_12 120.0 . . ?
C3_12 C8_12 H8_12 120.0 . . ?
C6_12 C7_12 C8_12 120.0 . . ?
C6_12 C7_12 H7_12 120.0 . . ?
C8_12 C7_12 H7_12 120.0 . . ?
C5_12 C6_12 C7_12 120.0 . . ?
C5_12 C6_12 C9_12 120.03(17) . . ?
C7_12 C6_12 C9_12 119.94(17) . . ?
C6_12 C5_12 C4_12 120.0 . . ?
C6_12 C5_12 H5_12 120.0 . . ?
C4_12 C5_12 H5_12 120.0 . . ?
C3_12 C4_12 C5_12 120.0 . . ?
C3_12 C4_12 H4_12 120.0 . . ?
C5_12 C4_12 H4_12 120.0 . . ?
C4_12 C3_12 C8_12 120.0 . . ?
C4_12 C3_12 S1_12 119.39(9) . . ?
C8_12 C3_12 S1_12 120.61(9) . . ?
O2_12 S1_12 O1_12 118.46(13) . . ?
O2_12 S1_12 C1_12 108.18(11) . . ?
O1_12 S1_12 C1_12 108.76(13) . . ?
O2_12 S1_12 C3_12 106.90(10) . . ?
O1_12 S1_12 C3_12 106.96(10) . . ?
C1_12 S1_12 C3_12 107.05(9) . . ?
C2_12 C1_12 S1_12 117.24(15) . . ?
C2_12 C1_12 Pt_11 68.77(11) . . ?
S1_12 C1_12 Pt_11 113.58(10) . . ?
C2_12 C1_12 H1_12 116.2 . . ?
S1_12 C1_12 H1_12 116.2 . . ?
Pt_11 C1_12 H1_12 116.2 . . ?
C1_12 C2_12 S2_12 116.60(14) . . ?
C1_12 C2_12 Pt_11 70.24(11) . . ?
S2_12 C2_12 Pt_11 112.95(9) . . ?
C1_12 C2_12 H2_12 116.3 . . ?
S2_12 C2_12 H2_12 116.3 . . ?
Pt_11 C2_12 H2_12 116.3 . . ?
O4_12 S2_12 O3_12 119.15(13) . . ?
O4_12 S2_12 C2_12 108.91(11) . . ?
O3_12 S2_12 C2_12 108.90(11) . . ?
O4_12 S2_12 C10_12 107.56(10) . . ?
O3_12 S2_12 C10_12 107.38(10) . . ?
C2_12 S2_12 C10_12 103.87(8) . . ?
C13_12 C16_12 H16A_12 109.5 . . ?
C13_12 C16_12 H16B_12 109.5 . . ?
H16A_12 C16_12 H16B_12 109.5 . . ?
C13_12 C16_12 H16C_12 109.5 . . ?
H16A_12 C16_12 H16C_12 109.5 . . ?
H16B_12 C16_12 H16C_12 109.5 . . ?
C14_12 C15_12 C10_12 120.0 . . ?
C14_12 C15_12 H15_12 120.0 . . ?
C10_12 C15_12 H15_12 120.0 . . ?
C13_12 C14_12 C15_12 120.0 . . ?
C13_12 C14_12 H14_12 120.0 . . ?
C15_12 C14_12 H14_12 120.0 . . ?
C12_12 C13_12 C14_12 120.0 . . ?
C12_12 C13_12 C16_12 120.66(17) . . ?
C14_12 C13_12 C16_12 119.26(17) . . ?
C11_12 C12_12 C13_12 120.0 . . ?
C11_12 C12_12 H12_12 120.0 . . ?
C13_12 C12_12 H12_12 120.0 . . ?
C12_12 C11_12 C10_12 120.0 . . ?
C12_12 C11_12 H11_12 120.0 . . ?
C10_12 C11_12 H11_12 120.0 . . ?
C11_12 C10_12 C15_12 120.0 . . ?
C11_12 C10_12 S2_12 121.07(9) . . ?
C15_12 C10_12 S2_12 118.80(9) . . ?
C1_13 P_13 C7_13 103.31(7) . . ?
C1_13 P_13 C13_13 104.79(7) . . ?
C7_13 P_13 C13_13 100.62(7) . . ?
C1_13 P_13 Pt_11 119.25(6) . . ?
C7_13 P_13 Pt_11 112.05(6) . . ?
C13_13 P_13 Pt_11 114.65(5) . . ?
C17_13 C18_13 C13_13 120.0 . . ?
C17_13 C18_13 H18_13 120.0 . . ?
C13_13 C18_13 H18_13 120.0 . . ?
C16_13 C17_13 C18_13 120.0 . . ?
C16_13 C17_13 H17_13 120.0 . . ?
C18_13 C17_13 H17_13 120.0 . . ?
C17_13 C16_13 C15_13 120.0 . . ?
C17_13 C16_13 H16_13 120.0 . . ?
C15_13 C16_13 H16_13 120.0 . . ?
C14_13 C15_13 C16_13 120.0 . . ?
C14_13 C15_13 H15_13 120.0 . . ?
C16_13 C15_13 H15_13 120.0 . . ?
C13_13 C14_13 C15_13 120.0 . . ?
C13_13 C14_13 H14_13 120.0 . . ?
C15_13 C14_13 H14_13 120.0 . . ?
C14_13 C13_13 C18_13 120.0 . . ?
C14_13 C13_13 P_13 118.87(7) . . ?
C18_13 C13_13 P_13 121.13(7) . . ?
C8_13 C7_13 C12_13 120.0 . . ?
C8_13 C7_13 P_13 122.61(7) . . ?
C12_13 C7_13 P_13 117.39(7) . . ?
C7_13 C8_13 C9_13 120.0 . . ?
C7_13 C8_13 H8_13 120.0 . . ?
C9_13 C8_13 H8_13 120.0 . . ?
C10_13 C9_13 C8_13 120.0 . . ?
C10_13 C9_13 H9_13 120.0 . . ?
C8_13 C9_13 H9_13 120.0 . . ?
C9_13 C10_13 C11_13 120.0 . . ?
C9_13 C10_13 H10_13 120.0 . . ?
C11_13 C10_13 H10_13 120.0 . . ?
C10_13 C11_13 C12_13 120.0 . . ?
C10_13 C11_13 H11_13 120.0 . . ?
C12_13 C11_13 H11_13 120.0 . . ?
C11_13 C12_13 C7_13 120.0 . . ?
C11_13 C12_13 H12_13 120.0 . . ?
C7_13 C12_13 H12_13 120.0 . . ?
C2_13 C1_13 C6_13 120.0 . . ?
C2_13 C1_13 P_13 117.39(9) . . ?
C6_13 C1_13 P_13 122.60(9) . . ?
C1_13 C2_13 C3_13 120.0 . . ?
C1_13 C2_13 H2_13 120.0 . . ?
C3_13 C2_13 H2_13 120.0 . . ?
C4_13 C3_13 C2_13 120.0 . . ?
C4_13 C3_13 H3_13 120.0 . . ?
C2_13 C3_13 H3_13 120.0 . . ?
C3_13 C4_13 C5_13 120.0 . . ?
C3_13 C4_13 H4_13 120.0 . . ?
C5_13 C4_13 H4_13 120.0 . . ?
C4_13 C5_13 C6_13 120.0 . . ?
C4_13 C5_13 H5_13 120.0 . . ?
C6_13 C5_13 H5_13 120.0 . . ?
C5_13 C6_13 C1_13 120.0 . . ?
C5_13 C6_13 H6_13 120.0 . . ?
C1_13 C6_13 H6_13 120.0 . . ?
C13A_14 P_14 C1_14 105.19(11) . . ?
C13A_14 P_14 C7_14 101.47(12) . . ?
C1_14 P_14 C7_14 104.25(7) . . ?
C1_14 P_14 C13B_14 104.14(12) . . ?
C7_14 P_14 C13B_14 105.19(14) . . ?
C13A_14 P_14 Pt_11 116.35(11) . . ?
C1_14 P_14 Pt_11 118.78(5) . . ?
C7_14 P_14 Pt_11 108.81(6) . . ?
C13B_14 P_14 Pt_11 114.43(12) . . ?
C17A_14 C18A_14 C13A_14 120.0 . . ?
C17A_14 C18A_14 H18A_14 120.0 . . ?
C13A_14 C18A_14 H18A_14 120.0 . . ?
C16A_14 C17A_14 C18A_14 120.0 . . ?
C16A_14 C17A_14 H17A_14 120.0 . . ?
C18A_14 C17A_14 H17A_14 120.0 . . ?
C17A_14 C16A_14 C15A_14 120.0 . . ?
C17A_14 C16A_14 H16A_14 120.0 . . ?
C15A_14 C16A_14 H16A_14 120.0 . . ?
C14A_14 C15A_14 C16A_14 120.0 . . ?
C14A_14 C15A_14 H15A_14 120.0 . . ?
C16A_14 C15A_14 H15A_14 120.0 . . ?
C15A_14 C14A_14 C13A_14 120.0 . . ?
C15A_14 C14A_14 H14A_14 120.0 . . ?
C13A_14 C14A_14 H14A_14 120.0 . . ?
C14A_14 C13A_14 C18A_14 120.0 . . ?
C14A_14 C13A_14 P_14 120.93(18) . . ?
C18A_14 C13A_14 P_14 118.98(18) . . ?
C17B_14 C18B_14 C13B_14 120.0 . . ?
C17B_14 C18B_14 H18B_14 120.0 . . ?
C13B_14 C18B_14 H18B_14 120.0 . . ?
C18B_14 C17B_14 C16B_14 120.0 . . ?
C18B_14 C17B_14 H17B_14 120.0 . . ?
C16B_14 C17B_14 H17B_14 120.0 . . ?
C17B_14 C16B_14 C15B_14 120.0 . . ?
C17B_14 C16B_14 H16B_14 120.0 . . ?
C15B_14 C16B_14 H16B_14 120.0 . . ?
C14B_14 C15B_14 C16B_14 120.0 . . ?
C14B_14 C15B_14 H15B_14 120.0 . . ?
C16B_14 C15B_14 H15B_14 120.0 . . ?
C15B_14 C14B_14 C13B_14 120.0 . . ?
C15B_14 C14B_14 H14B_14 120.0 . . ?
C13B_14 C14B_14 H14B_14 120.0 . . ?
C14B_14 C13B_14 C18B_14 120.0 . . ?
C14B_14 C13B_14 P_14 119.6(2) . . ?
C18B_14 C13B_14 P_14 120.0(2) . . ?
C8_14 C7_14 C12_14 120.0 . . ?
C8_14 C7_14 P_14 121.78(8) . . ?
C12_14 C7_14 P_14 118.11(8) . . ?
C9_14 C8_14 C7_14 120.0 . . ?
C9_14 C8_14 H8_14 120.0 . . ?
C7_14 C8_14 H8_14 120.0 . . ?
C10_14 C9_14 C8_14 120.0 . . ?
C10_14 C9_14 H9_14 120.0 . . ?
C8_14 C9_14 H9_14 120.0 . . ?
C9_14 C10_14 C11_14 120.0 . . ?
C9_14 C10_14 H10_14 120.0 . . ?
C11_14 C10_14 H10_14 120.0 . . ?
C10_14 C11_14 C12_14 120.0 . . ?
C10_14 C11_14 H11_14 120.0 . . ?
C12_14 C11_14 H11_14 120.0 . . ?
C11_14 C12_14 C7_14 120.0 . . ?
C11_14 C12_14 H12_14 120.0 . . ?
C7_14 C12_14 H12_14 120.0 . . ?
C2_14 C1_14 C6_14 120.0 . . ?
C2_14 C1_14 P_14 117.42(8) . . ?
C6_14 C1_14 P_14 122.57(8) . . ?
C1_14 C2_14 C3_14 120.0 . . ?
C1_14 C2_14 H2_14 120.0 . . ?
C3_14 C2_14 H2_14 120.0 . . ?
C4_14 C3_14 C2_14 120.0 . . ?
C4_14 C3_14 H3_14 120.0 . . ?
C2_14 C3_14 H3_14 120.0 . . ?
C3_14 C4_14 C5_14 120.0 . . ?
C3_14 C4_14 H4_14 120.0 . . ?
C5_14 C4_14 H4_14 120.0 . . ?
C6_14 C5_14 C4_14 120.0 . . ?
C6_14 C5_14 H5_14 120.0 . . ?
C4_14 C5_14 H5_14 120.0 . . ?
C5_14 C6_14 C1_14 120.0 . . ?
C5_14 C6_14 H6_14 120.0 . . ?
C1_14 C6_14 H6_14 120.0 . . ?
C2_22 Pt_21 C1_22 40.84(7) . . ?
C2_22 Pt_21 PB_24 149.75(13) . . ?
C1_22 Pt_21 PB_24 108.97(13) . . ?
C2_22 Pt_21 P_23 101.75(5) . . ?
C1_22 Pt_21 P_23 141.81(5) . . ?
PB_24 Pt_21 P_23 108.41(13) . . ?
C2_22 Pt_21 PA_24 150.86(13) . . ?
C1_22 Pt_21 PA_24 110.67(13) . . ?
P_23 Pt_21 PA_24 107.26(12) . . ?
C6_22 C9_22 H9A_22 109.5 . . ?
C6_22 C9_22 H9B_22 109.5 . . ?
H9A_22 C9_22 H9B_22 109.5 . . ?
C6_22 C9_22 H9C_22 109.5 . . ?
H9A_22 C9_22 H9C_22 109.5 . . ?
H9B_22 C9_22 H9C_22 109.5 . . ?
C7_22 C8_22 C3_22 120.0 . . ?
C7_22 C8_22 H8_22 120.0 . . ?
C3_22 C8_22 H8_22 120.0 . . ?
C8_22 C7_22 C6_22 120.0 . . ?
C8_22 C7_22 H7_22 120.0 . . ?
C6_22 C7_22 H7_22 120.0 . . ?
C7_22 C6_22 C5_22 120.0 . . ?
C7_22 C6_22 C9_22 120.10(16) . . ?
C5_22 C6_22 C9_22 119.86(16) . . ?
C4_22 C5_22 C6_22 120.0 . . ?
C4_22 C5_22 H5_22 120.0 . . ?
C6_22 C5_22 H5_22 120.0 . . ?
C5_22 C4_22 C3_22 120.0 . . ?
C5_22 C4_22 H4_22 120.0 . . ?
C3_22 C4_22 H4_22 120.0 . . ?
C4_22 C3_22 C8_22 120.0 . . ?
C4_22 C3_22 S1_22 119.88(7) . . ?
C8_22 C3_22 S1_22 120.10(8) . . ?
O1_22 S1_22 O2_22 118.73(10) . . ?
O1_22 S1_22 C1_22 108.21(9) . . ?
O2_22 S1_22 C1_22 109.59(9) . . ?
O1_22 S1_22 C3_22 107.90(8) . . ?
O2_22 S1_22 C3_22 106.38(8) . . ?
C1_22 S1_22 C3_22 105.20(7) . . ?
C2_22 C1_22 S1_22 115.52(13) . . ?
C2_22 C1_22 Pt_21 67.96(9) . . ?
S1_22 C1_22 Pt_21 115.24(9) . . ?
C2_22 C1_22 H1_22 116.4 . . ?
S1_22 C1_22 H1_22 116.4 . . ?
Pt_21 C1_22 H1_22 116.4 . . ?
C1_22 C2_22 S2_22 117.25(13) . . ?
C1_22 C2_22 Pt_21 71.20(9) . . ?
S2_22 C2_22 Pt_21 114.88(9) . . ?
C1_22 C2_22 H2_22 115.4 . . ?
S2_22 C2_22 H2_22 115.4 . . ?
Pt_21 C2_22 H2_22 115.4 . . ?
O4_22 S2_22 O3_22 117.77(11) . . ?
O4_22 S2_22 C10_22 107.13(9) . . ?
O3_22 S2_22 C10_22 109.11(9) . . ?
O4_22 S2_22 C2_22 109.01(9) . . ?
O3_22 S2_22 C2_22 109.26(9) . . ?
C10_22 S2_22 C2_22 103.63(8) . . ?
C13_22 C16_22 H16A_22 109.5 . . ?
C13_22 C16_22 H16B_22 109.5 . . ?
H16A_22 C16_22 H16B_22 109.5 . . ?
C13_22 C16_22 H16C_22 109.5 . . ?
H16A_22 C16_22 H16C_22 109.5 . . ?
H16B_22 C16_22 H16C_22 109.5 . . ?
C14_22 C15_22 C10_22 120.0 . . ?
C14_22 C15_22 H15_22 120.0 . . ?
C10_22 C15_22 H15_22 120.0 . . ?
C15_22 C14_22 C13_22 120.0 . . ?
C15_22 C14_22 H14_22 120.0 . . ?
C13_22 C14_22 H14_22 120.0 . . ?
C14_22 C13_22 C12_22 120.0 . . ?
C14_22 C13_22 C16_22 120.59(19) . . ?
C12_22 C13_22 C16_22 119.41(19) . . ?
C11_22 C12_22 C13_22 120.0 . . ?
C11_22 C12_22 H12_22 120.0 . . ?
C13_22 C12_22 H12_22 120.0 . . ?
C10_22 C11_22 C12_22 120.0 . . ?
C10_22 C11_22 H11_22 120.0 . . ?
C12_22 C11_22 H11_22 120.0 . . ?
C11_22 C10_22 C15_22 120.0 . . ?
C11_22 C10_22 S2_22 120.28(8) . . ?
C15_22 C10_22 S2_22 119.71(8) . . ?
C1_23 P_23 C13_23 102.22(7) . . ?
C1_23 P_23 C7_23 104.19(7) . . ?
C13_23 P_23 C7_23 103.68(7) . . ?
C1_23 P_23 Pt_21 120.14(5) . . ?
C13_23 P_23 Pt_21 116.78(5) . . ?
C7_23 P_23 Pt_21 108.03(5) . . ?
C17_23 C18_23 C13_23 120.0 . . ?
C17_23 C18_23 H18_23 120.0 . . ?
C13_23 C18_23 H18_23 120.0 . . ?
C18_23 C17_23 C16_23 120.0 . . ?
C18_23 C17_23 H17_23 120.0 . . ?
C16_23 C17_23 H17_23 120.0 . . ?
C15_23 C16_23 C17_23 120.0 . . ?
C15_23 C16_23 H16_23 120.0 . . ?
C17_23 C16_23 H16_23 120.0 . . ?
C14_23 C15_23 C16_23 120.0 . . ?
C14_23 C15_23 H15_23 120.0 . . ?
C16_23 C15_23 H15_23 120.0 . . ?
C15_23 C14_23 C13_23 120.0 . . ?
C15_23 C14_23 H14_23 120.0 . . ?
C13_23 C14_23 H14_23 120.0 . . ?
C14_23 C13_23 C18_23 120.0 . . ?
C14_23 C13_23 P_23 117.80(8) . . ?
C18_23 C13_23 P_23 122.18(8) . . ?
C8_23 C7_23 C12_23 120.0 . . ?
C8_23 C7_23 P_23 122.12(7) . . ?
C12_23 C7_23 P_23 117.65(7) . . ?
C7_23 C8_23 C9_23 120.0 . . ?
C7_23 C8_23 H8_23 120.0 . . ?
C9_23 C8_23 H8_23 120.0 . . ?
C10_23 C9_23 C8_23 120.0 . . ?
C10_23 C9_23 H9_23 120.0 . . ?
C8_23 C9_23 H9_23 120.0 . . ?
C11_23 C10_23 C9_23 120.0 . . ?
C11_23 C10_23 H10_23 120.0 . . ?
C9_23 C10_23 H10_23 120.0 . . ?
C12_23 C11_23 C10_23 120.0 . . ?
C12_23 C11_23 H11_23 120.0 . . ?
C10_23 C11_23 H11_23 120.0 . . ?
C11_23 C12_23 C7_23 120.0 . . ?
C11_23 C12_23 H12_23 120.0 . . ?
C7_23 C12_23 H12_23 120.0 . . ?
C2_23 C1_23 C6_23 120.0 . . ?
C2_23 C1_23 P_23 118.96(8) . . ?
C6_23 C1_23 P_23 121.04(7) . . ?
C3_23 C2_23 C1_23 120.0 . . ?
C3_23 C2_23 H2_23 120.0 . . ?
C1_23 C2_23 H2_23 120.0 . . ?
C2_23 C3_23 C4_23 120.0 . . ?
C2_23 C3_23 H3_23 120.0 . . ?
C4_23 C3_23 H3_23 120.0 . . ?
C5_23 C4_23 C3_23 120.0 . . ?
C5_23 C4_23 H4_23 120.0 . . ?
C3_23 C4_23 H4_23 120.0 . . ?
C4_23 C5_23 C6_23 120.0 . . ?
C4_23 C5_23 H5_23 120.0 . . ?
C6_23 C5_23 H5_23 120.0 . . ?
C5_23 C6_23 C1_23 120.0 . . ?
C5_23 C6_23 H6_23 120.0 . . ?
C1_23 C6_23 H6_23 120.0 . . ?
C13A_24 PA_24 C7A_24 102.15(19) . . ?
C13A_24 PA_24 C1A_24 101.6(3) . . ?
C7A_24 PA_24 C1A_24 119.3(3) . . ?
C13A_24 PA_24 Pt_21 115.4(2) . . ?
C7A_24 PA_24 Pt_21 114.2(2) . . ?
C1A_24 PA_24 Pt_21 103.94(15) . . ?
C17A_24 C18A_24 C13A_24 120.0 . . ?
C17A_24 C18A_24 H18A_24 120.0 . . ?
C13A_24 C18A_24 H18A_24 120.0 . . ?
C16A_24 C17A_24 C18A_24 120.0 . . ?
C16A_24 C17A_24 H17A_24 120.0 . . ?
C18A_24 C17A_24 H17A_24 120.0 . . ?
C17A_24 C16A_24 C15A_24 120.0 . . ?
C17A_24 C16A_24 H16A_24 120.0 . . ?
C15A_24 C16A_24 H16A_24 120.0 . . ?
C14A_24 C15A_24 C16A_24 120.0 . . ?
C14A_24 C15A_24 H15A_24 120.0 . . ?
C16A_24 C15A_24 H15A_24 120.0 . . ?
C15A_24 C14A_24 C13A_24 120.0 . . ?
C15A_24 C14A_24 H14A_24 120.0 . . ?
C13A_24 C14A_24 H14A_24 120.0 . . ?
C14A_24 C13A_24 C18A_24 120.0 . . ?
C14A_24 C13A_24 PA_24 116.6(2) . . ?
C18A_24 C13A_24 PA_24 123.4(2) . . ?
C8A_24 C7A_24 C12A_24 120.0 . . ?
C8A_24 C7A_24 PA_24 117.86(17) . . ?
C12A_24 C7A_24 PA_24 122.14(17) . . ?
C7A_24 C8A_24 C9A_24 120.0 . . ?
C7A_24 C8A_24 H8A_24 120.0 . . ?
C9A_24 C8A_24 H8A_24 120.0 . . ?
C10A_24 C9A_24 C8A_24 120.0 . . ?
C10A_24 C9A_24 H9A_24 120.0 . . ?
C8A_24 C9A_24 H9A_24 120.0 . . ?
C9A_24 C10A_24 C11A_24 120.0 . . ?
C9A_24 C10A_24 H10A_24 120.0 . . ?
C11A_24 C10A_24 H10A_24 120.0 . . ?
C10A_24 C11A_24 C12A_24 120.0 . . ?
C10A_24 C11A_24 H11A_24 120.0 . . ?
C12A_24 C11A_24 H11A_24 120.0 . . ?
C11A_24 C12A_24 C7A_24 120.0 . . ?
C11A_24 C12A_24 H12A_24 120.0 . . ?
C7A_24 C12A_24 H12A_24 120.0 . . ?
C2A_24 C1A_24 C6A_24 120.0 . . ?
C2A_24 C1A_24 PA_24 123.81(17) . . ?
C6A_24 C1A_24 PA_24 116.13(17) . . ?
C1A_24 C2A_24 C3A_24 120.0 . . ?
C1A_24 C2A_24 H2A_24 120.0 . . ?
C3A_24 C2A_24 H2A_24 120.0 . . ?
C4A_24 C3A_24 C2A_24 120.0 . . ?
C4A_24 C3A_24 H3A_24 120.0 . . ?
C2A_24 C3A_24 H3A_24 120.0 . . ?
C3A_24 C4A_24 C5A_24 120.0 . . ?
C3A_24 C4A_24 H4A_24 120.0 . . ?
C5A_24 C4A_24 H4A_24 120.0 . . ?
C4A_24 C5A_24 C6A_24 120.0 . . ?
C4A_24 C5A_24 H5A_24 120.0 . . ?
C6A_24 C5A_24 H5A_24 120.0 . . ?
C5A_24 C6A_24 C1A_24 120.0 . . ?
C5A_24 C6A_24 H6A_24 120.0 . . ?
C1A_24 C6A_24 H6A_24 120.0 . . ?
C1B_24 PB_24 C7B_24 91.9(3) . . ?
C1B_24 PB_24 C13B_24 100.9(2) . . ?
C7B_24 PB_24 C13B_24 100.3(2) . . ?
C1B_24 PB_24 Pt_21 129.97(19) . . ?
C7B_24 PB_24 Pt_21 109.6(2) . . ?
C13B_24 PB_24 Pt_21 117.8(3) . . ?
C17B_24 C18B_24 C13B_24 120.0 . . ?
C17B_24 C18B_24 H18B_24 120.0 . . ?
C13B_24 C18B_24 H18B_24 120.0 . . ?
C16B_24 C17B_24 C18B_24 120.0 . . ?
C16B_24 C17B_24 H17B_24 120.0 . . ?
C18B_24 C17B_24 H17B_24 120.0 . . ?
C15B_24 C16B_24 C17B_24 120.0 . . ?
C15B_24 C16B_24 H16B_24 120.0 . . ?
C17B_24 C16B_24 H16B_24 120.0 . . ?
C14B_24 C15B_24 C16B_24 120.0 . . ?
C14B_24 C15B_24 H15B_24 120.0 . . ?
C16B_24 C15B_24 H15B_24 120.0 . . ?
C15B_24 C14B_24 C13B_24 120.0 . . ?
C15B_24 C14B_24 H14B_24 120.0 . . ?
C13B_24 C14B_24 H14B_24 120.0 . . ?
C14B_24 C13B_24 C18B_24 120.0 . . ?
C14B_24 C13B_24 PB_24 119.7(2) . . ?
C18B_24 C13B_24 PB_24 120.3(2) . . ?
C8B_24 C7B_24 C12B_24 120.0 . . ?
C8B_24 C7B_24 PB_24 123.7(2) . . ?
C12B_24 C7B_24 PB_24 116.3(2) . . ?
C7B_24 C8B_24 C9B_24 120.0 . . ?
C7B_24 C8B_24 H8B_24 120.0 . . ?
C9B_24 C8B_24 H8B_24 120.0 . . ?
C10B_24 C9B_24 C8B_24 120.0 . . ?
C10B_24 C9B_24 H9B_24 120.0 . . ?
C8B_24 C9B_24 H9B_24 120.0 . . ?
C11B_24 C10B_24 C9B_24 120.0 . . ?
C11B_24 C10B_24 H10B_24 120.0 . . ?
C9B_24 C10B_24 H10B_24 120.0 . . ?
C12B_24 C11B_24 C10B_24 120.0 . . ?
C12B_24 C11B_24 H11B_24 120.0 . . ?
C10B_24 C11B_24 H11B_24 120.0 . . ?
C11B_24 C12B_24 C7B_24 120.0 . . ?
C11B_24 C12B_24 H12B_24 120.0 . . ?
C7B_24 C12B_24 H12B_24 120.0 . . ?
C2B_24 C1B_24 C6B_24 120.0 . . ?
C2B_24 C1B_24 PB_24 128.0(2) . . ?
C6B_24 C1B_24 PB_24 112.0(2) . . ?
C1B_24 C2B_24 C3B_24 120.0 . . ?
C1B_24 C2B_24 H2B_24 120.0 . . ?
C3B_24 C2B_24 H2B_24 120.0 . . ?
C4B_24 C3B_24 C2B_24 120.0 . . ?
C4B_24 C3B_24 H3B_24 120.0 . . ?
C2B_24 C3B_24 H3B_24 120.0 . . ?
C5B_24 C4B_24 C3B_24 120.0 . . ?
C5B_24 C4B_24 H4B_24 120.0 . . ?
C3B_24 C4B_24 H4B_24 120.0 . . ?
C6B_24 C5B_24 C4B_24 120.0 . . ?
C6B_24 C5B_24 H5B_24 120.0 . . ?
C4B_24 C5B_24 H5B_24 120.0 . . ?
C5B_24 C6B_24 C1B_24 120.0 . . ?
C5B_24 C6B_24 H6B_24 120.0 . . ?
C1B_24 C6B_24 H6B_24 120.0 . . ?
 
loop_
 _geom_torsion_atom_site_label_1
 _geom_torsion_atom_site_label_2
 _geom_torsion_atom_site_label_3
 _geom_torsion_atom_site_label_4
 _geom_torsion
 _geom_torsion_site_symmetry_1
 _geom_torsion_site_symmetry_2
 _geom_torsion_site_symmetry_3
 _geom_torsion_site_symmetry_4
 _geom_torsion_publ_flag
C3_91 O1_91 C2_91 C1_91 -107.4(10) . . . . ?
C2_91 O1_91 C3_91 C4_91 155.7(8) . . . . ?
C3_12 C8_12 C7_12 C6_12 0.0 . . . . ?
C8_12 C7_12 C6_12 C5_12 0.0 . . . . ?
C8_12 C7_12 C6_12 C9_12 178.2(2) . . . . ?
C7_12 C6_12 C5_12 C4_12 0.0 . . . . ?
C9_12 C6_12 C5_12 C4_12 -178.2(2) . . . . ?
C6_12 C5_12 C4_12 C3_12 0.0 . . . . ?
C5_12 C4_12 C3_12 C8_12 0.0 . . . . ?
C5_12 C4_12 C3_12 S1_12 -179.79(13) . . . . ?
C7_12 C8_12 C3_12 C4_12 0.0 . . . . ?
C7_12 C8_12 C3_12 S1_12 179.79(13) . . . . ?
C4_12 C3_12 S1_12 O2_12 126.43(13) . . . . ?
C8_12 C3_12 S1_12 O2_12 -53.36(14) . . . . ?
C4_12 C3_12 S1_12 O1_12 -1.40(15) . . . . ?
C8_12 C3_12 S1_12 O1_12 178.81(14) . . . . ?
C4_12 C3_12 S1_12 C1_12 -117.83(13) . . . . ?
C8_12 C3_12 S1_12 C1_12 62.38(14) . . . . ?
O2_12 S1_12 C1_12 C2_12 29.71(18) . . . . ?
O1_12 S1_12 C1_12 C2_12 159.59(15) . . . . ?
C3_12 S1_12 C1_12 C2_12 -85.18(15) . . . . ?
O2_12 S1_12 C1_12 Pt_11 -47.60(15) . . . . ?
O1_12 S1_12 C1_12 Pt_11 82.28(14) . . . . ?
C3_12 S1_12 C1_12 Pt_11 -162.49(10) . . . . ?
S1_12 C1_12 C2_12 S2_12 147.11(11) . . . . ?
Pt_11 C1_12 C2_12 S2_12 -106.47(12) . . . . ?
S1_12 C1_12 C2_12 Pt_11 -106.42(12) . . . . ?
C1_12 C2_12 S2_12 O4_12 156.72(15) . . . . ?
Pt_11 C2_12 S2_12 O4_12 78.17(14) . . . . ?
C1_12 C2_12 S2_12 O3_12 25.30(18) . . . . ?
Pt_11 C2_12 S2_12 O3_12 -53.24(15) . . . . ?
C1_12 C2_12 S2_12 C10_12 -88.89(15) . . . . ?
Pt_11 C2_12 S2_12 C10_12 -167.43(10) . . . . ?
C10_12 C15_12 C14_12 C13_12 0.0 . . . . ?
C15_12 C14_12 C13_12 C12_12 0.0 . . . . ?
C15_12 C14_12 C13_12 C16_12 -176.8(2) . . . . ?
C14_12 C13_12 C12_12 C11_12 0.0 . . . . ?
C16_12 C13_12 C12_12 C11_12 176.8(2) . . . . ?
C13_12 C12_12 C11_12 C10_12 0.0 . . . . ?
C12_12 C11_12 C10_12 C15_12 0.0 . . . . ?
C12_12 C11_12 C10_12 S2_12 -175.80(12) . . . . ?
C14_12 C15_12 C10_12 C11_12 0.0 . . . . ?
C14_12 C15_12 C10_12 S2_12 175.89(12) . . . . ?
O4_12 S2_12 C10_12 C11_12 -156.48(11) . . . . ?
O3_12 S2_12 C10_12 C11_12 -27.11(14) . . . . ?
C2_12 S2_12 C10_12 C11_12 88.16(12) . . . . ?
O4_12 S2_12 C10_12 C15_12 27.67(13) . . . . ?
O3_12 S2_12 C10_12 C15_12 157.04(12) . . . . ?
C2_12 S2_12 C10_12 C15_12 -87.69(13) . . . . ?
C13_13 C18_13 C17_13 C16_13 0.0 . . . . ?
C18_13 C17_13 C16_13 C15_13 0.0 . . . . ?
C17_13 C16_13 C15_13 C14_13 0.0 . . . . ?
C16_13 C15_13 C14_13 C13_13 0.0 . . . . ?
C15_13 C14_13 C13_13 C18_13 0.0 . . . . ?
C15_13 C14_13 C13_13 P_13 -179.86(9) . . . . ?
C17_13 C18_13 C13_13 C14_13 0.0 . . . . ?
C17_13 C18_13 C13_13 P_13 179.86(10) . . . . ?
C1_13 P_13 C13_13 C14_13 103.33(9) . . . . ?
C7_13 P_13 C13_13 C14_13 -149.71(8) . . . . ?
Pt_11 P_13 C13_13 C14_13 -29.29(9) . . . . ?
C1_13 P_13 C13_13 C18_13 -76.53(10) . . . . ?
C7_13 P_13 C13_13 C18_13 30.43(9) . . . . ?
Pt_11 P_13 C13_13 C18_13 150.84(6) . . . . ?
C1_13 P_13 C7_13 C8_13 -1.22(11) . . . . ?
C13_13 P_13 C7_13 C8_13 -109.35(10) . . . . ?
Pt_11 P_13 C7_13 C8_13 128.39(8) . . . . ?
C1_13 P_13 C7_13 C12_13 178.35(9) . . . . ?
C13_13 P_13 C7_13 C12_13 70.21(10) . . . . ?
Pt_11 P_13 C7_13 C12_13 -52.04(9) . . . . ?
C12_13 C7_13 C8_13 C9_13 0.0 . . . . ?
P_13 C7_13 C8_13 C9_13 179.56(12) . . . . ?
C7_13 C8_13 C9_13 C10_13 0.0 . . . . ?
C8_13 C9_13 C10_13 C11_13 0.0 . . . . ?
C9_13 C10_13 C11_13 C12_13 0.0 . . . . ?
C10_13 C11_13 C12_13 C7_13 0.0 . . . . ?
C8_13 C7_13 C12_13 C11_13 0.0 . . . . ?
P_13 C7_13 C12_13 C11_13 -179.58(11) . . . . ?
C7_13 P_13 C1_13 C2_13 83.35(10) . . . . ?
C13_13 P_13 C1_13 C2_13 -171.69(9) . . . . ?
Pt_11 P_13 C1_13 C2_13 -41.72(10) . . . . ?
C7_13 P_13 C1_13 C6_13 -95.84(11) . . . . ?
C13_13 P_13 C1_13 C6_13 9.12(11) . . . . ?
Pt_11 P_13 C1_13 C6_13 139.09(9) . . . . ?
C6_13 C1_13 C2_13 C3_13 0.0 . . . . ?
P_13 C1_13 C2_13 C3_13 -179.21(11) . . . . ?
C1_13 C2_13 C3_13 C4_13 0.0 . . . . ?
C2_13 C3_13 C4_13 C5_13 0.0 . . . . ?
C3_13 C4_13 C5_13 C6_13 0.0 . . . . ?
C4_13 C5_13 C6_13 C1_13 0.0 . . . . ?
C2_13 C1_13 C6_13 C5_13 0.0 . . . . ?
P_13 C1_13 C6_13 C5_13 179.17(12) . . . . ?
C13A_14 C18A_14 C17A_14 C16A_14 0.0 . . . . ?
C18A_14 C17A_14 C16A_14 C15A_14 0.0 . . . . ?
C17A_14 C16A_14 C15A_14 C14A_14 0.0 . . . . ?
C16A_14 C15A_14 C14A_14 C13A_14 0.0 . . . . ?
C15A_14 C14A_14 C13A_14 C18A_14 0.0 . . . . ?
C15A_14 C14A_14 C13A_14 P_14 -176.5(2) . . . . ?
C17A_14 C18A_14 C13A_14 C14A_14 0.0 . . . . ?
C17A_14 C18A_14 C13A_14 P_14 176.5(2) . . . . ?
C1_14 P_14 C13A_14 C14A_14 -117.09(19) . . . . ?
C7_14 P_14 C13A_14 C14A_14 -8.7(2) . . . . ?
Pt_11 P_14 C13A_14 C14A_14 109.18(18) . . . . ?
C1_14 P_14 C13A_14 C18A_14 66.4(2) . . . . ?
C7_14 P_14 C13A_14 C18A_14 174.79(18) . . . . ?
Pt_11 P_14 C13A_14 C18A_14 -67.3(2) . . . . ?
C13B_14 C18B_14 C17B_14 C16B_14 0.0 . . . . ?
C18B_14 C17B_14 C16B_14 C15B_14 0.0 . . . . ?
C17B_14 C16B_14 C15B_14 C14B_14 0.0 . . . . ?
C16B_14 C15B_14 C14B_14 C13B_14 0.0 . . . . ?
C15B_14 C14B_14 C13B_14 C18B_14 0.0 . . . . ?
C15B_14 C14B_14 C13B_14 P_14 -172.8(3) . . . . ?
C17B_14 C18B_14 C13B_14 C14B_14 0.0 . . . . ?
C17B_14 C18B_14 C13B_14 P_14 172.8(3) . . . . ?
C1_14 P_14 C13B_14 C14B_14 -147.5(2) . . . . ?
C7_14 P_14 C13B_14 C14B_14 -38.2(2) . . . . ?
Pt_11 P_14 C13B_14 C14B_14 81.2(2) . . . . ?
C1_14 P_14 C13B_14 C18B_14 39.7(2) . . . . ?
C7_14 P_14 C13B_14 C18B_14 149.0(2) . . . . ?
Pt_11 P_14 C13B_14 C18B_14 -91.6(2) . . . . ?
C13A_14 P_14 C7_14 C8_14 -96.97(14) . . . . ?
C1_14 P_14 C7_14 C8_14 12.14(12) . . . . ?
C13B_14 P_14 C7_14 C8_14 -97.14(16) . . . . ?
Pt_11 P_14 C7_14 C8_14 139.83(10) . . . . ?
C13A_14 P_14 C7_14 C12_14 79.11(15) . . . . ?
C1_14 P_14 C7_14 C12_14 -171.78(10) . . . . ?
C13B_14 P_14 C7_14 C12_14 78.95(16) . . . . ?
Pt_11 P_14 C7_14 C12_14 -44.09(11) . . . . ?
C12_14 C7_14 C8_14 C9_14 0.0 . . . . ?
P_14 C7_14 C8_14 C9_14 176.01(13) . . . . ?
C7_14 C8_14 C9_14 C10_14 0.0 . . . . ?
C8_14 C9_14 C10_14 C11_14 0.0 . . . . ?
C9_14 C10_14 C11_14 C12_14 0.0 . . . . ?
C10_14 C11_14 C12_14 C7_14 0.0 . . . . ?
C8_14 C7_14 C12_14 C11_14 0.0 . . . . ?
P_14 C7_14 C12_14 C11_14 -176.16(13) . . . . ?
C13A_14 P_14 C1_14 C2_14 -155.96(12) . . . . ?
C7_14 P_14 C1_14 C2_14 97.69(10) . . . . ?
C13B_14 P_14 C1_14 C2_14 -152.27(15) . . . . ?
Pt_11 P_14 C1_14 C2_14 -23.59(10) . . . . ?
C13A_14 P_14 C1_14 C6_14 25.00(14) . . . . ?
C7_14 P_14 C1_14 C6_14 -81.35(10) . . . . ?
C13B_14 P_14 C1_14 C6_14 28.70(16) . . . . ?
Pt_11 P_14 C1_14 C6_14 157.37(7) . . . . ?
C6_14 C1_14 C2_14 C3_14 0.0 . . . . ?
P_14 C1_14 C2_14 C3_14 -179.06(10) . . . . ?
C1_14 C2_14 C3_14 C4_14 0.0 . . . . ?
C2_14 C3_14 C4_14 C5_14 0.0 . . . . ?
C3_14 C4_14 C5_14 C6_14 0.0 . . . . ?
C4_14 C5_14 C6_14 C1_14 0.0 . . . . ?
C2_14 C1_14 C6_14 C5_14 0.0 . . . . ?
P_14 C1_14 C6_14 C5_14 179.01(11) . . . . ?
C3_22 C8_22 C7_22 C6_22 0.0 . . . . ?
C8_22 C7_22 C6_22 C5_22 0.0 . . . . ?
C8_22 C7_22 C6_22 C9_22 -177.84(17) . . . . ?
C7_22 C6_22 C5_22 C4_22 0.0 . . . . ?
C9_22 C6_22 C5_22 C4_22 177.84(17) . . . . ?
C6_22 C5_22 C4_22 C3_22 0.0 . . . . ?
C5_22 C4_22 C3_22 C8_22 0.0 . . . . ?
C5_22 C4_22 C3_22 S1_22 -178.71(10) . . . . ?
C7_22 C8_22 C3_22 C4_22 0.0 . . . . ?
C7_22 C8_22 C3_22 S1_22 178.71(10) . . . . ?
C4_22 C3_22 S1_22 O1_22 49.38(12) . . . . ?
C8_22 C3_22 S1_22 O1_22 -129.33(10) . . . . ?
C4_22 C3_22 S1_22 O2_22 177.80(10) . . . . ?
C8_22 C3_22 S1_22 O2_22 -0.91(11) . . . . ?
C4_22 C3_22 S1_22 C1_22 -65.97(11) . . . . ?
C8_22 C3_22 S1_22 C1_22 115.32(10) . . . . ?
O1_22 S1_22 C1_22 C2_22 178.42(12) . . . . ?
O2_22 S1_22 C1_22 C2_22 47.56(14) . . . . ?
C3_22 S1_22 C1_22 C2_22 -66.45(13) . . . . ?
O1_22 S1_22 C1_22 Pt_21 101.99(10) . . . . ?
O2_22 S1_22 C1_22 Pt_21 -28.86(12) . . . . ?
C3_22 S1_22 C1_22 Pt_21 -142.88(8) . . . . ?
S1_22 C1_22 C2_22 S2_22 142.60(10) . . . . ?
Pt_21 C1_22 C2_22 S2_22 -108.94(12) . . . . ?
S1_22 C1_22 C2_22 Pt_21 -108.46(11) . . . . ?
C1_22 C2_22 S2_22 O4_22 150.13(14) . . . . ?
Pt_21 C2_22 S2_22 O4_22 69.39(12) . . . . ?
C1_22 C2_22 S2_22 O3_22 20.17(16) . . . . ?
Pt_21 C2_22 S2_22 O3_22 -60.58(12) . . . . ?
C1_22 C2_22 S2_22 C10_22 -96.03(14) . . . . ?
Pt_21 C2_22 S2_22 C10_22 -176.78(8) . . . . ?
C10_22 C15_22 C14_22 C13_22 0.0 . . . . ?
C15_22 C14_22 C13_22 C12_22 0.0 . . . . ?
C15_22 C14_22 C13_22 C16_22 179.46(18) . . . . ?
C14_22 C13_22 C12_22 C11_22 0.0 . . . . ?
C16_22 C13_22 C12_22 C11_22 -179.46(18) . . . . ?
C13_22 C12_22 C11_22 C10_22 0.0 . . . . ?
C12_22 C11_22 C10_22 C15_22 0.0 . . . . ?
C12_22 C11_22 C10_22 S2_22 -179.09(11) . . . . ?
C14_22 C15_22 C10_22 C11_22 0.0 . . . . ?
C14_22 C15_22 C10_22 S2_22 179.09(11) . . . . ?
O4_22 S2_22 C10_22 C11_22 -149.90(11) . . . . ?
O3_22 S2_22 C10_22 C11_22 -21.38(12) . . . . ?
C2_22 S2_22 C10_22 C11_22 94.93(11) . . . . ?
O4_22 S2_22 C10_22 C15_22 31.01(12) . . . . ?
O3_22 S2_22 C10_22 C15_22 159.53(10) . . . . ?
C2_22 S2_22 C10_22 C15_22 -84.16(10) . . . . ?
C13_23 C18_23 C17_23 C16_23 0.0 . . . . ?
C18_23 C17_23 C16_23 C15_23 0.0 . . . . ?
C17_23 C16_23 C15_23 C14_23 0.0 . . . . ?
C16_23 C15_23 C14_23 C13_23 0.0 . . . . ?
C15_23 C14_23 C13_23 C18_23 0.0 . . . . ?
C15_23 C14_23 C13_23 P_23 178.45(10) . . . . ?
C17_23 C18_23 C13_23 C14_23 0.0 . . . . ?
C17_23 C18_23 C13_23 P_23 -178.38(11) . . . . ?
C1_23 P_23 C13_23 C14_23 55.40(10) . . . . ?
C7_23 P_23 C13_23 C14_23 163.51(8) . . . . ?
Pt_21 P_23 C13_23 C14_23 -77.82(9) . . . . ?
C1_23 P_23 C13_23 C18_23 -126.19(10) . . . . ?
C7_23 P_23 C13_23 C18_23 -18.08(10) . . . . ?
Pt_21 P_23 C13_23 C18_23 100.58(9) . . . . ?
C1_23 P_23 C7_23 C8_23 -2.27(9) . . . . ?
C13_23 P_23 C7_23 C8_23 -108.90(9) . . . . ?
Pt_21 P_23 C7_23 C8_23 126.56(7) . . . . ?
C1_23 P_23 C7_23 C12_23 -176.70(7) . . . . ?
C13_23 P_23 C7_23 C12_23 76.67(9) . . . . ?
Pt_21 P_23 C7_23 C12_23 -47.87(8) . . . . ?
C12_23 C7_23 C8_23 C9_23 0.0 . . . . ?
P_23 C7_23 C8_23 C9_23 -174.30(10) . . . . ?
C7_23 C8_23 C9_23 C10_23 0.0 . . . . ?
C8_23 C9_23 C10_23 C11_23 0.0 . . . . ?
C9_23 C10_23 C11_23 C12_23 0.0 . . . . ?
C10_23 C11_23 C12_23 C7_23 0.0 . . . . ?
C8_23 C7_23 C12_23 C11_23 0.0 . . . . ?
P_23 C7_23 C12_23 C11_23 174.55(10) . . . . ?
C13_23 P_23 C1_23 C2_23 -153.93(9) . . . . ?
C7_23 P_23 C1_23 C2_23 98.35(9) . . . . ?
Pt_21 P_23 C1_23 C2_23 -22.71(10) . . . . ?
C13_23 P_23 C1_23 C6_23 25.60(10) . . . . ?
C7_23 P_23 C1_23 C6_23 -82.12(10) . . . . ?
Pt_21 P_23 C1_23 C6_23 156.82(7) . . . . ?
C6_23 C1_23 C2_23 C3_23 0.0 . . . . ?
P_23 C1_23 C2_23 C3_23 179.53(11) . . . . ?
C1_23 C2_23 C3_23 C4_23 0.0 . . . . ?
C2_23 C3_23 C4_23 C5_23 0.0 . . . . ?
C3_23 C4_23 C5_23 C6_23 0.0 . . . . ?
C4_23 C5_23 C6_23 C1_23 0.0 . . . . ?
C2_23 C1_23 C6_23 C5_23 0.0 . . . . ?
P_23 C1_23 C6_23 C5_23 -179.52(11) . . . . ?
C13A_24 C18A_24 C17A_24 C16A_24 0.0 . . . . ?
C18A_24 C17A_24 C16A_24 C15A_24 0.0 . . . . ?
C17A_24 C16A_24 C15A_24 C14A_24 0.0 . . . . ?
C16A_24 C15A_24 C14A_24 C13A_24 0.0 . . . . ?
C15A_24 C14A_24 C13A_24 C18A_24 0.0 . . . . ?
C15A_24 C14A_24 C13A_24 PA_24 180.0(2) . . . . ?
C17A_24 C18A_24 C13A_24 C14A_24 0.0 . . . . ?
C17A_24 C18A_24 C13A_24 PA_24 -180.0(3) . . . . ?
C7A_24 PA_24 C13A_24 C14A_24 -76.0(3) . . . . ?
C1A_24 PA_24 C13A_24 C14A_24 160.27(17) . . . . ?
Pt_21 PA_24 C13A_24 C14A_24 48.5(3) . . . . ?
C7A_24 PA_24 C13A_24 C18A_24 103.9(3) . . . . ?
C1A_24 PA_24 C13A_24 C18A_24 -19.8(3) . . . . ?
Pt_21 PA_24 C13A_24 C18A_24 -131.5(2) . . . . ?
C13A_24 PA_24 C7A_24 C8A_24 178.09(19) . . . . ?
C1A_24 PA_24 C7A_24 C8A_24 -71.0(3) . . . . ?
Pt_21 PA_24 C7A_24 C8A_24 52.7(3) . . . . ?
C13A_24 PA_24 C7A_24 C12A_24 -1.0(3) . . . . ?
C1A_24 PA_24 C7A_24 C12A_24 109.9(2) . . . . ?
Pt_21 PA_24 C7A_24 C12A_24 -126.39(19) . . . . ?
C12A_24 C7A_24 C8A_24 C9A_24 0.0 . . . . ?
PA_24 C7A_24 C8A_24 C9A_24 -179.2(3) . . . . ?
C7A_24 C8A_24 C9A_24 C10A_24 0.0 . . . . ?
C8A_24 C9A_24 C10A_24 C11A_24 0.0 . . . . ?
C9A_24 C10A_24 C11A_24 C12A_24 0.0 . . . . ?
C10A_24 C11A_24 C12A_24 C7A_24 0.0 . . . . ?
C8A_24 C7A_24 C12A_24 C11A_24 0.0 . . . . ?
PA_24 C7A_24 C12A_24 C11A_24 179.1(3) . . . . ?
C6A_24 C1A_24 C2A_24 C3A_24 0.0 . . . . ?
PA_24 C1A_24 C2A_24 C3A_24 -177.0(2) . . . . ?
C1A_24 C2A_24 C3A_24 C4A_24 0.0 . . . . ?
C2A_24 C3A_24 C4A_24 C5A_24 0.0 . . . . ?
C3A_24 C4A_24 C5A_24 C6A_24 0.0 . . . . ?
C4A_24 C5A_24 C6A_24 C1A_24 0.0 . . . . ?
C2A_24 C1A_24 C6A_24 C5A_24 0.0 . . . . ?
PA_24 C1A_24 C6A_24 C5A_24 177.2(2) . . . . ?
C13B_24 C18B_24 C17B_24 C16B_24 0.0 . . . . ?
C18B_24 C17B_24 C16B_24 C15B_24 0.0 . . . . ?
C17B_24 C16B_24 C15B_24 C14B_24 0.0 . . . . ?
C16B_24 C15B_24 C14B_24 C13B_24 0.0 . . . . ?
C15B_24 C14B_24 C13B_24 C18B_24 0.0 . . . . ?
C15B_24 C14B_24 C13B_24 PB_24 -179.2(3) . . . . ?
C17B_24 C18B_24 C13B_24 C14B_24 0.0 . . . . ?
C17B_24 C18B_24 C13B_24 PB_24 179.2(3) . . . . ?
C1B_24 PB_24 C13B_24 C14B_24 136.7(2) . . . . ?
C7B_24 PB_24 C13B_24 C14B_24 -129.3(2) . . . . ?
Pt_21 PB_24 C13B_24 C14B_24 -10.5(4) . . . . ?
C1B_24 PB_24 C13B_24 C18B_24 -42.4(3) . . . . ?
C7B_24 PB_24 C13B_24 C18B_24 51.6(3) . . . . ?
Pt_21 PB_24 C13B_24 C18B_24 170.3(2) . . . . ?
C1B_24 PB_24 C7B_24 C8B_24 -2.9(2) . . . . ?
C13B_24 PB_24 C7B_24 C8B_24 -104.4(2) . . . . ?
Pt_21 PB_24 C7B_24 C8B_24 131.03(19) . . . . ?
C1B_24 PB_24 C7B_24 C12B_24 174.89(16) . . . . ?
C13B_24 PB_24 C7B_24 C12B_24 73.4(3) . . . . ?
Pt_21 PB_24 C7B_24 C12B_24 -51.1(2) . . . . ?
C12B_24 C7B_24 C8B_24 C9B_24 0.0 . . . . ?
PB_24 C7B_24 C8B_24 C9B_24 177.8(2) . . . . ?
C7B_24 C8B_24 C9B_24 C10B_24 0.0 . . . . ?
C8B_24 C9B_24 C10B_24 C11B_24 0.0 . . . . ?
C9B_24 C10B_24 C11B_24 C12B_24 0.0 . . . . ?
C10B_24 C11B_24 C12B_24 C7B_24 0.0 . . . . ?
C8B_24 C7B_24 C12B_24 C11B_24 0.0 . . . . ?
PB_24 C7B_24 C12B_24 C11B_24 -177.9(2) . . . . ?
C7B_24 PB_24 C1B_24 C2B_24 -36.9(3) . . . . ?
C13B_24 PB_24 C1B_24 C2B_24 64.0(3) . . . . ?
Pt_21 PB_24 C1B_24 C2B_24 -154.7(2) . . . . ?
C7B_24 PB_24 C1B_24 C6B_24 144.80(18) . . . . ?
C13B_24 PB_24 C1B_24 C6B_24 -114.3(2) . . . . ?
Pt_21 PB_24 C1B_24 C6B_24 27.0(4) . . . . ?
C6B_24 C1B_24 C2B_24 C3B_24 0.0 . . . . ?
PB_24 C1B_24 C2B_24 C3B_24 -178.2(3) . . . . ?
C1B_24 C2B_24 C3B_24 C4B_24 0.0 . . . . ?
C2B_24 C3B_24 C4B_24 C5B_24 0.0 . . . . ?
C3B_24 C4B_24 C5B_24 C6B_24 0.0 . . . . ?
C4B_24 C5B_24 C6B_24 C1B_24 0.0 . . . . ?
C2B_24 C1B_24 C6B_24 C5B_24 0.0 . . . . ?
PB_24 C1B_24 C6B_24 C5B_24 178.5(3) . . . . ?
 
_refine_diff_density_max    2.362
_refine_diff_density_min   -2.224
_refine_diff_density_rms    0.114

_shelx_res_file
;
TITL X4ESxT-23May085352_a.res in P-1
    XDS_ASCII_scaled46_unmerged.res
    created by SHELXL-2018/3 at 20:06:09 on 27-Aug-2023

REM Old TITL X4ESxT-23May085352 in P-1
REM SHELXT solution in P-1: R1 0.144, Rweak 0.008, Alpha 0.054
REM <I/s>   0.000 for    0 systematic absences,  Orientation as input
REM Formula found by SHELXT:  C88 N18 O9 S8 I2

CELL 0.62000  14.66000  17.98150  18.58500 101.5745  96.1230  98.7980
ZERR    4.00   0.00293   0.00360   0.00372   0.0300   0.0300   0.0300
LATT  1
SFAC  C   H O  S  Pt  P Cl
DISP    Pt   -0.84788    6.75574     24349.60
DISP    H     0.00000    0.00000         0.66
DISP    C     0.00201    0.00119         8.75
DISP    O     0.00771    0.00451        22.87
DISP    S     0.09937    0.09447       352.74
DISP    P     0.08091    0.07202       271.84
DISP    Cl    0.11982    0.12156       450.13
UNIT 213 195 17 8 4 8 2
L.S. 8
LIST 4
BOND $H
CONF
MERG 2
FMAP 2
rem PLAN   25
rem SHEL 180 0.64
ACTA
WPDB -2
TEMP -173.15
SIZE 0.1 0.05 0.02
REM HFIX_MCH 23 C1
REM HFIX_TOE 43 C11 C12 C14 C15 C4 C8 C5 C7
REM HFIX_TOE 13 C1 C2
REM HFIX_TOE 137 C9 C16
rem HFIX_HPX  43 C3 C2 C5 C6 C8 C9 c4 c10 c16
rem HFIX_HPX  43 C11 C12 C14 C15 C17 C18
rem HFIX_14 43 C14a C15a C17a C18a C16a C16b C14b C15b C17b C18b
rem hfix_etz 137 c1a c4a c1b c4b
rem hfix_etz 23 c2a c3a c2b c3b
rem HFIX_24  43 C3a C2a C5a C6a C8a C9a c4a c10a c16a
rem HFIX_24  43 C11a C12a C14a C15a C17a C18a
rem HFIX_24  43 C3b C2b C5b C6b C8b C9b c4b c10b c16b
rem HFIX_24  43 C11b C12b C14b C15b C17b C18b

PLAN 20
sump 1 0.01 1.0 4 1.0 5 1.0 6

REM Omit extracted on Sun Aug 27 20:00:13 2023
omit 1 -4 1
omit 1 -1 1
omit 0 2 0
omit 1 2 3

WGHT    0.021100    6.102100
EXTI    0.007488
FVAR       0.19691   0.49750   0.48890   0.60022   0.20589   0.14294
RESI   91   ETZ
simu 0.01 o1_91 > cl2b_92
dfix_91 1.42 0.01 o1 c2 o1 c3
dfix_91 1.47 0.01 c1 c2 c3 c4
dang_91 2.37 0.01 c1 o1 o1 c4
dang_91 2.40 0.01 c2 c3
sadi_91 0.01 o1 c2 o1 c3
sadi_91 0.01 c1 c2 c3 c4
PART    1
O1    3    0.266591    0.427050    0.115725    41.00000    0.09253    0.08826 =
         0.12507    0.00104   -0.00916   -0.00599
C1    1    0.399487    0.468151    0.057663    41.00000    0.06021    0.05176 =
         0.05166   -0.02087    0.00320    0.02451
AFIX  33
H1A   2    0.466218    0.489895    0.069117    41.00000   -1.50000
H1B   2    0.390239    0.417978    0.022860    41.00000   -1.50000
H1C   2    0.366528    0.503208    0.035226    41.00000   -1.50000
AFIX   0
C2    1    0.363008    0.458290    0.125769    41.00000    0.07754    0.07484 =
         0.11062   -0.00183    0.01573    0.01085
AFIX  23
H2A   2    0.398048    0.423985    0.148611    41.00000   -1.20000
H2B   2    0.374374    0.509082    0.160958    41.00000   -1.20000
AFIX   0
C3    1    0.201806    0.475335    0.139998    41.00000    0.04453    0.03536 =
         0.04142    0.01469    0.00506    0.00681
AFIX  23
H3A   2    0.222255    0.528016    0.132614    41.00000   -1.20000
H3B   2    0.198697    0.478709    0.193482    41.00000   -1.20000
AFIX   0
C4    1    0.111405    0.442685    0.097596    41.00000    0.12788    0.07977 =
         0.10383    0.05876    0.05426    0.04458
AFIX  33
H4A   2    0.066294    0.475260    0.113700    41.00000   -1.50000
H4B   2    0.114956    0.439869    0.044784    41.00000   -1.50000
H4A3  2    0.091472    0.390716    0.105461    41.00000   -1.50000
AFIX   0

RESI   92 MCH
PART  -2
dfix_MCH 1.75 0.01 c1a cl1a c1a cl2a
dang_MCH 2.87 0.01 cl1a cl2a
C1A   1    0.377410    0.457747    0.141060    51.00000    0.06243    0.04269 =
         0.06452    0.03047   -0.00412    0.02432
AFIX  23
H1A   2    0.412433    0.500311    0.181460    51.00000   -1.20000
H1B   2    0.398364    0.409404    0.147517    51.00000   -1.20000
AFIX   0
CL1A  7    0.401272    0.476137    0.054958    51.00000    0.09130    0.08388 =
         0.06479    0.04479   -0.03953   -0.05048
CL2A  7    0.257475    0.449271    0.146765    51.00000    0.04861    0.05630 =
         0.05052    0.02048    0.00062   -0.01197
PART  -3
same_92 0.01 c1a > cl2a
C1B   1    0.258187    0.484469    0.074335    61.00000    0.07536    0.06438 =
         0.07916    0.01521    0.00031    0.00773
AFIX  23
H1C   2    0.261381    0.515473    0.035968    61.00000   -1.20000
H1D   2    0.252003    0.518940    0.121613    61.00000   -1.20000
AFIX   0
CL1B  7    0.360868    0.447238    0.085101    61.00000    0.08435    0.07336 =
         0.03010    0.01326    0.02430    0.03776
CL2B  7    0.159976    0.410342    0.048318    61.00000    0.14391    0.07073 =
         0.08946    0.02727   -0.01140    0.01292
PART    0

RESI 11 Pt
PT    5    0.967867    0.280756    0.702644    11.00000    0.01413    0.02592 =
         0.01748    0.01128    0.00650    0.00649

RESI 12 TOE
C9    1    0.653802    0.378386    1.079223    11.00000    0.05969    0.05163 =
         0.06151    0.00614    0.04560    0.01043
AFIX 137
H9A   2    0.626750    0.423194    1.071364    11.00000   -1.50000
H9B   2    0.681924    0.387326    1.131169    11.00000   -1.50000
H9C   2    0.604774    0.332394    1.067428    11.00000   -1.50000
AFIX  66
C8    1    0.783113    0.289317    0.926887    11.00000    0.03847    0.03129 =
         0.02904    0.01096    0.01703    0.01206
AFIX  43
H8    2    0.775105    0.243568    0.889215    11.00000   -1.20000
AFIX  65
C7    1    0.716390    0.299431    0.974066    11.00000    0.03138    0.03357 =
         0.03090    0.01379    0.01586    0.01017
AFIX  43
H7    2    0.662779    0.260593    0.968639    11.00000   -1.20000
AFIX  65
C6    1    0.728109    0.366369    1.029186    11.00000    0.03906    0.03995 =
         0.03450    0.00776    0.02239    0.00804
C5    1    0.806550    0.423194    1.037127    11.00000    0.06116    0.05500 =
         0.04980   -0.01562    0.03777   -0.01377
AFIX  43
H5    2    0.814558    0.468943    1.074799    11.00000   -1.20000
AFIX  65
C4    1    0.873273    0.413082    0.989947    11.00000    0.04583    0.05816 =
         0.04072   -0.01300    0.02499   -0.01406
AFIX  43
H4    2    0.926884    0.451920    0.995375    11.00000   -1.20000
AFIX  65
C3    1    0.861556    0.346144    0.934828    11.00000    0.02589    0.04143 =
         0.02277    0.00877    0.01041    0.01061
AFIX   0
S1    4    0.947518    0.334088    0.875381    11.00000    0.02215    0.04789 =
         0.02245    0.00921    0.00933    0.01133
O1    3    1.017868    0.403080    0.896814    11.00000    0.03060    0.06755 =
         0.03624   -0.00082    0.01576   -0.00312
O2    3    0.974978    0.261248    0.878662    11.00000    0.03492    0.06329 =
         0.02428    0.01794    0.00883    0.02921
C1    1    0.893453    0.327754    0.785018    11.00000    0.02242    0.03903 =
         0.02467    0.01587    0.01257    0.01441
AFIX  13
H1    2    0.864749    0.372852    0.776640    11.00000   -1.20000
AFIX   0
C2    1    0.844479    0.252091    0.743634    11.00000    0.01557    0.03957 =
         0.02236    0.01844    0.00753    0.01016
AFIX  13
H2    2    0.841520    0.209452    0.771023    11.00000   -1.20000
AFIX   0
S2    4    0.745217    0.250356    0.681034    11.00000    0.01555    0.06061 =
         0.02792    0.02916    0.00781    0.01187
O4    3    0.728660    0.179820    0.625539    11.00000    0.02157    0.08251 =
         0.02177    0.01333    0.00296    0.01180
O3    3    0.753461    0.322983    0.658080    11.00000    0.02305    0.08043 =
         0.05542    0.05630    0.01137    0.01457
C16   1    0.445746    0.230733    0.880482    11.00000    0.03248    0.07167 =
         0.05378    0.03325    0.02733    0.02204
AFIX 137
H16A  2    0.405516    0.269069    0.877179    11.00000   -1.50000
H16B  2    0.478107    0.240264    0.931281    11.00000   -1.50000
H16C  2    0.407669    0.178898    0.867292    11.00000   -1.50000
AFIX  66
C15   1    0.608897    0.174622    0.741848    11.00000    0.02447    0.04248 =
         0.03495    0.01667    0.01251    0.00664
AFIX  43
H15   2    0.624997    0.128850    0.714951    11.00000   -1.20000
AFIX  65
C14   1    0.540528    0.169911    0.787946    11.00000    0.02623    0.04572 =
         0.04058    0.02254    0.01483    0.00701
AFIX  43
H14   2    0.509900    0.120919    0.792555    11.00000   -1.20000
AFIX  65
C13   1    0.516971    0.236883    0.827301    11.00000    0.02370    0.05546 =
         0.04450    0.03083    0.01863    0.01955
C12   1    0.561783    0.308566    0.820558    11.00000    0.03907    0.04807 =
         0.08072    0.03280    0.03791    0.02719
AFIX  43
H12   2    0.545683    0.354338    0.847455    11.00000   -1.20000
AFIX  65
C11   1    0.630153    0.313278    0.774460    11.00000    0.03353    0.04423 =
         0.07400    0.03729    0.03020    0.02213
AFIX  43
H11   2    0.660779    0.362271    0.769851    11.00000   -1.20000
AFIX  65
C10   1    0.653710    0.246307    0.735105    11.00000    0.01618    0.04535 =
         0.03369    0.02581    0.01023    0.01197
AFIX   0

RESI  13 HPX
P     6    0.987803    0.172854    0.621127    11.00000    0.01417    0.02653 =
         0.01468    0.00766    0.00192    0.00092
AFIX  66
C18   1    1.098319    0.057608    0.625425    11.00000    0.02606    0.02566 =
         0.01747    0.00146    0.00053    0.00377
AFIX  43
H18   2    1.045215    0.022378    0.597963    11.00000   -1.20000
AFIX  65
C17   1    1.179700    0.031099    0.644852    11.00000    0.03250    0.02774 =
         0.02152    0.00367    0.00247    0.01047
AFIX  43
H17   2    1.182217   -0.022249    0.630668    11.00000   -1.20000
AFIX  65
C16   1    1.257400    0.082646    0.685033    11.00000    0.02318    0.03469 =
         0.02711    0.01046    0.00337    0.01069
AFIX  43
H16   2    1.313020    0.064528    0.698310    11.00000   -1.20000
AFIX  65
C15   1    1.253719    0.160703    0.705786    11.00000    0.01822    0.03129 =
         0.03205    0.00787   -0.00106    0.00352
AFIX  43
H15   2    1.306824    0.195933    0.733248    11.00000   -1.20000
AFIX  65
C14   1    1.172338    0.187214    0.686359    11.00000    0.01788    0.02399 =
         0.02404    0.00399    0.00030    0.00283
AFIX  43
H14   2    1.169823    0.240562    0.700544    11.00000   -1.20000
AFIX  65
C13   1    1.094638    0.135667    0.646179    11.00000    0.01664    0.02497 =
         0.01364    0.00296    0.00341    0.00320
AFIX  66
C7    1    0.898497    0.089202    0.619870    11.00000    0.01604    0.03066 =
         0.02059    0.01204    0.00015   -0.00060
C8    1    0.846056    0.044212    0.554653    11.00000    0.02326    0.03295 =
         0.02364    0.01253   -0.00374   -0.00448
AFIX  43
H8    2    0.855598    0.056627    0.508369    11.00000   -1.20000
AFIX  65
C9    1    0.779655   -0.018943    0.557155    11.00000    0.02990    0.04380 =
         0.03598    0.02024   -0.01127   -0.01320
AFIX  43
H9    2    0.743814   -0.049692    0.512581    11.00000   -1.20000
AFIX  65
C10   1    0.765693   -0.037109    0.624875    11.00000    0.02996    0.05072 =
         0.04524    0.02903   -0.00697   -0.01671
AFIX  43
H10   2    0.720311   -0.080273    0.626585    11.00000   -1.20000
AFIX  65
C11   1    0.818133    0.007880    0.690093    11.00000    0.02385    0.04732 =
         0.03242    0.02424    0.00154   -0.00360
AFIX  43
H11   2    0.808591   -0.004536    0.736377    11.00000   -1.20000
AFIX  65
C12   1    0.884535    0.071035    0.687592    11.00000    0.01955    0.03807 =
         0.02306    0.01616    0.00101   -0.00001
AFIX  43
H12   2    0.920375    0.101783    0.732166    11.00000   -1.20000
AFIX  66
C1    1    0.985966    0.174421    0.522897    11.00000    0.02558    0.03600 =
         0.01592    0.01044   -0.00270   -0.00945
C2    1    0.918997    0.209756    0.491206    11.00000    0.04589    0.04448 =
         0.03051    0.02100   -0.00978   -0.00420
AFIX  43
H2    2    0.877006    0.232443    0.520578    11.00000   -1.20000
AFIX  65
C3    1    0.913467    0.211896    0.416539    11.00000    0.08115    0.05354 =
         0.03470    0.02666   -0.02453   -0.01283
AFIX  43
H3    2    0.867696    0.236046    0.394881    11.00000   -1.20000
AFIX  65
C4    1    0.974906    0.178702    0.373563    11.00000    0.09634    0.06117 =
         0.01642    0.01658   -0.01164   -0.03684
AFIX  43
H4    2    0.971126    0.180165    0.322532    11.00000   -1.20000
AFIX  65
C5    1    1.041875    0.143367    0.405253    11.00000    0.06236    0.06861 =
         0.01557    0.00448    0.00692   -0.02532
AFIX  43
H5    2    1.083865    0.120680    0.375880    11.00000   -1.20000
AFIX  65
C6    1    1.047406    0.141226    0.479919    11.00000    0.03541    0.06233 =
         0.01470    0.00706    0.00469   -0.00937
AFIX  43
H6    2    1.093177    0.117076    0.501578    11.00000   -1.20000
AFIX   0

RESI  14 HPX
rem exyz_14 c13a c13b
rem eadp_14 c13a c13b
rem exyz_14 c16a c16b
rem eadp_14 c16a c16b
rem dfix_14 1.82 0.01 p c13a p 13b
rem DANG_14 2.8 0.01 p c18a p 18b p c14a p 14b
rem sadi_14 0.01 p c13a p 13b p c1
rem sadi_14 0.01 p c18a p 18b p c14a p 14b p c2 p c6
rem flat_14 0.01 p c16a c14a c18a
rem flat_14 0.01 p c16b c14b c18b
P     6    1.080317    0.379180    0.691789    11.00000    0.01876    0.01919 =
         0.01739    0.00488    0.00693    0.00535
rem simu_14 0.01 c18a > c13b
part 1
AFIX  66
C18A  1    1.146844    0.322938    0.560779    31.00000    0.02565    0.01810 =
         0.02145    0.00819    0.00925    0.00717
AFIX  43
H18A  2    1.164565    0.284573    0.585095    31.00000   -1.20000
AFIX  65
C17A  1    1.162153    0.320883    0.487929    31.00000    0.02516    0.01990 =
         0.02066    0.00582    0.01185    0.00827
AFIX  43
H17A  2    1.190337    0.281113    0.462456    31.00000   -1.20000
AFIX  65
C16A  1    1.136224    0.377017    0.452352    31.00000    0.02473    0.02758 =
         0.01785    0.00896    0.00604    0.00616
AFIX  43
H16A  2    1.146687    0.375612    0.402562    31.00000   -1.20000
AFIX  65
C15A  1    1.094986    0.435206    0.489623    31.00000    0.03459    0.02744 =
         0.02156    0.01272    0.01136    0.01360
AFIX  43
H15A  2    1.077266    0.473571    0.465307    31.00000   -1.20000
AFIX  65
C14A  1    1.079677    0.437261    0.562473    31.00000    0.02970    0.02448 =
         0.01966    0.01029    0.00961    0.01202
AFIX  43
H14A  2    1.051493    0.477031    0.587946    31.00000   -1.20000
AFIX  65
C13A  1    1.105605    0.381128    0.598051    31.00000    0.01274    0.01751 =
         0.01459   -0.00096    0.00860    0.00547
AFIX  66
part 2
C18B  1    1.178928    0.337212    0.572605   -31.00000    0.04386    0.02502 =
         0.02968    0.00480    0.02244    0.00481
AFIX  43
H18B  2    1.217883    0.318875    0.606779   -31.00000   -1.20000
AFIX  65
C17B  1    1.192890    0.326368    0.498682   -31.00000    0.04566    0.03456 =
         0.03075   -0.00062    0.02393   -0.00460
AFIX  43
H17B  2    1.241387    0.300619    0.482333   -31.00000   -1.20000
AFIX  65
C16B  1    1.135893    0.353198    0.448680   -31.00000    0.04373    0.03878 =
         0.02114   -0.00856    0.01690   -0.01317
AFIX  43
H16B  2    1.145435    0.345786    0.398157   -31.00000   -1.20000
AFIX  65
C15B  1    1.064934    0.390872    0.472601   -31.00000    0.04012    0.04654 =
         0.01738   -0.00023    0.00550   -0.00446
AFIX  43
H15B  2    1.025979    0.409210    0.438426   -31.00000   -1.20000
AFIX  65
C14B  1    1.050971    0.401717    0.546523   -31.00000    0.02579    0.03962 =
         0.02010   -0.00203    0.00630   -0.00437
AFIX  43
H14B  2    1.002474    0.427466    0.562872   -31.00000   -1.20000
AFIX  65
C13B  1    1.107968    0.374888    0.596526   -31.00000    0.03807    0.02013 =
         0.02304    0.00917    0.00506   -0.00777
AFIX  66
part 0
C7    1    1.038628    0.470524    0.717857    11.00000    0.02526    0.02485 =
         0.02290    0.00163    0.00338    0.01115
C8    1    1.097106    0.536844    0.759542    11.00000    0.03807    0.03194 =
         0.05412   -0.01564   -0.01213    0.01916
AFIX  43
H8    2    1.159454    0.534811    0.777968    11.00000   -1.20000
AFIX  65
C9    1    1.064360    0.606139    0.774267    11.00000    0.05775    0.03728 =
         0.07890   -0.02425   -0.01996    0.02764
AFIX  43
H9    2    1.104327    0.651465    0.802757    11.00000   -1.20000
AFIX  65
C10   1    0.973136    0.609114    0.747308    11.00000    0.05571    0.04271 =
         0.05908   -0.00720   -0.00042    0.03386
AFIX  43
H10   2    0.950756    0.656474    0.757372    11.00000   -1.20000
AFIX  65
C11   1    0.914658    0.542795    0.705623    11.00000    0.03421    0.04524 =
         0.03515    0.01040    0.00783    0.02451
AFIX  43
H11   2    0.852311    0.544829    0.687197    11.00000   -1.20000
AFIX  65
C12   1    0.947403    0.473500    0.690897    11.00000    0.02560    0.03328 =
         0.02500    0.00829    0.00572    0.01309
AFIX  43
H12   2    0.907435    0.428173    0.662408    11.00000   -1.20000
AFIX  66
C1    1    1.194071    0.395085    0.748522    11.00000    0.02008    0.02285 =
         0.02299    0.00434    0.00640    0.00708
C2    1    1.198117    0.368134    0.813645    11.00000    0.02590    0.03283 =
         0.02285    0.00624    0.00241    0.00644
AFIX  43
H2    2    1.143151    0.341894    0.826722    11.00000   -1.20000
AFIX  65
C3    1    1.282588    0.379575    0.859636    11.00000    0.03357    0.04245 =
         0.02877    0.00700   -0.00214    0.01209
AFIX  43
H3    2    1.285353    0.361155    0.904145    11.00000   -1.20000
AFIX  65
C4    1    1.363013    0.417967    0.840503    11.00000    0.02390    0.05348 =
         0.04276    0.00301   -0.00207    0.01344
AFIX  43
H4    2    1.420745    0.425786    0.871936    11.00000   -1.20000
AFIX  65
C5    1    1.358968    0.444918    0.775380    11.00000    0.02023    0.05339 =
         0.04671    0.00752    0.00713    0.00710
AFIX  43
H5    2    1.413936    0.471158    0.762305    11.00000   -1.20000
AFIX  65
C6    1    1.274498    0.433478    0.729389    11.00000    0.02092    0.04035 =
         0.03569    0.00993    0.00976    0.00695
AFIX  43
H6    2    1.271734    0.451898    0.684880    11.00000   -1.20000
AFIX   0

rem same 0.01 pt_11 > c6_14
RESI 21 Pt
PT    5    0.440398    0.224990    0.254952    11.00000    0.01275    0.02411 =
         0.01421    0.00762    0.00310    0.00603

RESI  22 TOE
C9    1   -0.093810    0.114911   -0.021933    11.00000    0.02521    0.06435 =
         0.02777    0.00013   -0.00716    0.00813
AFIX 137
H9A   2   -0.149750    0.133237   -0.006319    11.00000   -1.50000
H9B   2   -0.106384    0.058424   -0.036327    11.00000   -1.50000
H9C   2   -0.076753    0.136035   -0.064320    11.00000   -1.50000
AFIX  66
C8    1    0.083247    0.114506    0.143004    11.00000    0.02854    0.02667 =
         0.04168    0.00280   -0.01080    0.00570
AFIX  43
H8    2    0.101229    0.079139    0.171132    11.00000   -1.20000
AFIX  65
C7    1    0.012328    0.089594    0.083083    11.00000    0.02926    0.03280 =
         0.04531   -0.00344   -0.01385    0.00519
AFIX  43
H7    2   -0.018160    0.037201    0.070258    11.00000   -1.20000
AFIX  65
C6    1   -0.013982    0.141341    0.041927    11.00000    0.01813    0.04865 =
         0.02101    0.00022    0.00042    0.00989
C5    1    0.030626    0.218001    0.060692    11.00000    0.02418    0.05020 =
         0.02309    0.01562   -0.00038    0.00512
AFIX  43
H5    2    0.012644    0.253367    0.032563    11.00000   -1.20000
AFIX  65
C4    1    0.101545    0.242913    0.120612    11.00000    0.02470    0.03741 =
         0.02263    0.01219   -0.00114    0.00203
AFIX  43
H4    2    0.132032    0.295307    0.133437    11.00000   -1.20000
AFIX  65
C3    1    0.127856    0.191167    0.161769    11.00000    0.01441    0.02864 =
         0.01656    0.00289    0.00241    0.00650
AFIX   0
S1    4    0.216610    0.223527    0.239233    11.00000    0.01470    0.02249 =
         0.01345    0.00343    0.00301    0.00506
O1    3    0.195107    0.291545    0.284766    11.00000    0.02411    0.03258 =
         0.02050   -0.00391    0.00697    0.00906
O2    3    0.224810    0.157725    0.271231    11.00000    0.02199    0.03112 =
         0.02462    0.01448    0.00185    0.00227
C1    1    0.318282    0.250387    0.202365    11.00000    0.01497    0.02267 =
         0.01471    0.00545    0.00265    0.00595
AFIX  13
H1    2    0.324653    0.300420    0.186042    11.00000   -1.20000
AFIX   0
C2    1    0.351617    0.187813    0.156183    11.00000    0.01574    0.02566 =
         0.01484    0.00611    0.00363    0.00779
AFIX  13
H2    2    0.312281    0.135575    0.148945    11.00000   -1.20000
AFIX   0
S2    4    0.399868    0.207231    0.078308    11.00000    0.01848    0.03213 =
         0.01464    0.00636    0.00496    0.00684
O4    3    0.469071    0.159815    0.063036    11.00000    0.02299    0.05921 =
         0.02097    0.00709    0.00754    0.02049
O3    3    0.427725    0.289490    0.087884    11.00000    0.03474    0.03502 =
         0.02371    0.00815    0.00784   -0.00476
C16   1    0.077163    0.092380   -0.169267    11.00000    0.03059    0.09352 =
         0.02049    0.00786   -0.00399   -0.00150
AFIX 137
H16A  2    0.033313    0.128534   -0.164751    11.00000   -1.50000
H16B  2    0.045328    0.041298   -0.166191    11.00000   -1.50000
H16C  2    0.100411    0.088999   -0.217129    11.00000   -1.50000
AFIX  66
C15   1    0.287153    0.096661   -0.029355    11.00000    0.02976    0.03337 =
         0.02883    0.00007   -0.00287    0.01196
AFIX  43
H15   2    0.324566    0.061998   -0.014845    11.00000   -1.20000
AFIX  65
C14   1    0.212503    0.069802   -0.086140    11.00000    0.03556    0.04463 =
         0.02911   -0.00682   -0.00229    0.00728
AFIX  43
H14   2    0.198895    0.016783   -0.110441    11.00000   -1.20000
AFIX  65
C13   1    0.157762    0.120520   -0.107370    11.00000    0.02261    0.06373 =
         0.01642    0.00881    0.00277    0.00573
C12   1    0.177672    0.198095   -0.071814    11.00000    0.02560    0.05277 =
         0.02469    0.01765    0.00162    0.01418
AFIX  43
H12   2    0.140259    0.232758   -0.086324    11.00000   -1.20000
AFIX  65
C11   1    0.252322    0.224954   -0.015029    11.00000    0.02663    0.03588 =
         0.02396    0.01195    0.00319    0.01239
AFIX  43
H11   2    0.265929    0.277974    0.009272    11.00000   -1.20000
AFIX  65
C10   1    0.307063    0.174238    0.006201    11.00000    0.02053    0.03027 =
         0.01423    0.00681    0.00409    0.01025
AFIX   0

RESI 23 HPX
P     6    0.532404    0.132786    0.247103    11.00000    0.01392    0.02572 =
         0.01343    0.00574    0.00325    0.00758
AFIX  66
C18   1    0.516148    0.029850    0.343731    11.00000    0.02523    0.04970 =
         0.02889    0.02379    0.00566    0.00491
AFIX  43
H18   2    0.468821   -0.002194    0.306768    11.00000   -1.20000
AFIX  65
C17   1    0.539560    0.007627    0.409756    11.00000    0.03432    0.06592 =
         0.03844    0.03745    0.01262    0.01340
AFIX  43
H17   2    0.508234   -0.039607    0.417918    11.00000   -1.20000
AFIX  65
C16   1    0.608807    0.054512    0.463840    11.00000    0.04203    0.06893 =
         0.02435    0.02548    0.01103    0.03035
AFIX  43
H16   2    0.624807    0.039323    0.508965    11.00000   -1.20000
AFIX  65
C15   1    0.654642    0.123621    0.451899    11.00000    0.05198    0.05072 =
         0.01791    0.00589   -0.00410    0.02530
AFIX  43
H15   2    0.701969    0.155665    0.488863    11.00000   -1.20000
AFIX  65
C14   1    0.631231    0.145846    0.385874    11.00000    0.04735    0.03081 =
         0.01671    0.00346   -0.00484    0.01558
AFIX  43
H14   2    0.662558    0.193079    0.377713    11.00000   -1.20000
AFIX  65
C13   1    0.561985    0.098961    0.331790    11.00000    0.02287    0.02954 =
         0.01533    0.00775    0.00458    0.01366
AFIX  66
C7    1    0.467884    0.045421    0.181444    11.00000    0.01650    0.02521 =
         0.01730    0.00578    0.00445    0.00616
C8    1    0.505383    0.008922    0.121232    11.00000    0.02325    0.02783 =
         0.01987    0.00296    0.00723    0.00678
AFIX  43
H8    2    0.568180    0.026204    0.115462    11.00000   -1.20000
AFIX  65
C9    1    0.451001   -0.052864    0.069462    11.00000    0.03201    0.02860 =
         0.02286    0.00114    0.00594    0.00772
AFIX  43
H9    2    0.476631   -0.077809    0.028310    11.00000   -1.20000
AFIX  65
C10   1    0.359120   -0.078151    0.077904    11.00000    0.03089    0.02575 =
         0.02853    0.00006   -0.00099    0.00468
AFIX  43
H10   2    0.321952   -0.120379    0.042521    11.00000   -1.20000
AFIX  65
C11   1    0.321619   -0.041653    0.138115    11.00000    0.02024    0.02836 =
         0.03155    0.00440    0.00163    0.00398
AFIX  43
H11   2    0.258822   -0.058935    0.143884    11.00000   -1.20000
AFIX  65
C12   1    0.376000    0.020133    0.189885    11.00000    0.01691    0.02722 =
         0.02280    0.00611    0.00430    0.00579
AFIX  43
H12   2    0.350370    0.045078    0.231037    11.00000   -1.20000
AFIX  66
C1    1    0.645499    0.149698    0.214391    11.00000    0.01458    0.03615 =
         0.01671    0.00445    0.00384    0.00640
C2    1    0.660861    0.203447    0.170685    11.00000    0.01853    0.06781 =
         0.02552    0.02367    0.00667    0.00639
AFIX  43
H2    2    0.612845    0.230451    0.157942    11.00000   -1.20000
AFIX  65
C3    1    0.746476    0.217685    0.145623    11.00000    0.02393    0.09158 =
         0.03010    0.02681    0.01031    0.00195
AFIX  43
H3    2    0.756975    0.254420    0.115752    11.00000   -1.20000
AFIX  65
C4    1    0.816730    0.178173    0.164267    11.00000    0.01932    0.07798 =
         0.02910    0.00194    0.01046    0.00345
AFIX  43
H4    2    0.875244    0.187904    0.147138    11.00000   -1.20000
AFIX  65
C5    1    0.801370    0.124424    0.207973    11.00000    0.01774    0.05123 =
         0.03373   -0.00802    0.00555    0.00984
AFIX  43
H5    2    0.849386    0.097420    0.220715    11.00000   -1.20000
AFIX  65
C6    1    0.715755    0.110185    0.233035    11.00000    0.01799    0.03396 =
         0.02927    0.00018    0.00392    0.00990
AFIX  43
H6    2    0.705257    0.073450    0.262906    11.00000   -1.20000
AFIX   0

RESI 24 HPX
RESI 24 HPX
rem same_14 0.01 p > c6
PART    1
PA    6    0.497917    0.317923    0.367379    21.00000    0.01401    0.01743 =
         0.00983   -0.00145    0.00202    0.00122
AFIX  66
C18A  1    0.667098    0.337236    0.464578    21.00000    0.02195    0.01814 =
         0.01423    0.00079    0.00071    0.00195
AFIX  43
H18A  2    0.630228    0.327960    0.501988    21.00000   -1.20000
AFIX  65
C17A  1    0.763804    0.351729    0.480541    21.00000    0.02147    0.02215 =
         0.02189    0.00069   -0.00441    0.00409
AFIX  43
H17A  2    0.793029    0.352358    0.528861    21.00000   -1.20000
AFIX  65
C16A  1    0.817751    0.365300    0.425804    21.00000    0.01704    0.02483 =
         0.03553    0.00473    0.00047    0.00165
AFIX  43
H16A  2    0.883846    0.375205    0.436714    21.00000   -1.20000
AFIX  65
C15A  1    0.774991    0.364379    0.355104    21.00000    0.01619    0.02654 =
         0.03151    0.00805    0.00241    0.00117
AFIX  43
H15A  2    0.811862    0.373655    0.317694    21.00000   -1.20000
AFIX  65
C14A  1    0.678285    0.349886    0.339140    21.00000    0.02225    0.01875 =
         0.01601    0.00476    0.00639    0.00257
AFIX  43
H14A  2    0.649061    0.349256    0.290820    21.00000   -1.20000
AFIX  65
C13A  1    0.624337    0.336314    0.393876    21.00000    0.01777    0.01445 =
         0.01596    0.00251    0.00188    0.00168
AFIX  66
C7A   1    0.473755    0.416465    0.366057    21.00000    0.02189    0.02048 =
         0.01912   -0.00281    0.00114    0.00684
C8A   1    0.382193    0.423853    0.345380    21.00000    0.02227    0.02626 =
         0.03805   -0.00864   -0.00337    0.00749
AFIX  43
H8A   2    0.334194    0.379578    0.333149    21.00000   -1.20000
AFIX  65
C9A   1    0.360859    0.496020    0.342598    21.00000    0.03409    0.02561 =
         0.04491   -0.00878   -0.00995    0.01589
AFIX  43
H9A   2    0.298281    0.501069    0.328466    21.00000   -1.20000
AFIX  65
C10A  1    0.431088    0.560801    0.360494    21.00000    0.04132    0.02535 =
         0.02430   -0.00026   -0.00220    0.01428
AFIX  43
H10A  2    0.416507    0.610124    0.358593    21.00000   -1.20000
AFIX  65
C11A  1    0.522650    0.553414    0.381171    21.00000    0.03634    0.02241 =
         0.02569    0.00457    0.00382    0.00682
AFIX  43
H11A  2    0.570648    0.597688    0.393402    21.00000   -1.20000
AFIX  65
C12A  1    0.543985    0.481247    0.383953    21.00000    0.02444    0.02075 =
         0.02330    0.00444    0.00166    0.00398
AFIX  43
H12A  2    0.606564    0.476198    0.398086    21.00000   -1.20000
AFIX  66
C1A   1    0.455779    0.267451    0.443421    21.00000    0.01867    0.01099 =
         0.01482    0.00219    0.00343    0.00351
C2A   1    0.363013    0.237235    0.444779    21.00000    0.01837    0.02115 =
         0.01900    0.00545    0.00308    0.00096
AFIX  43
H2A   2    0.316525    0.238573    0.405556    21.00000   -1.20000
AFIX  65
C3A   1    0.338267    0.205063    0.503526    21.00000    0.02312    0.02187 =
         0.02524    0.00907    0.00664    0.00198
AFIX  43
H3A   2    0.274865    0.184412    0.504453    21.00000   -1.20000
AFIX  65
C4A   1    0.406286    0.203105    0.560915    21.00000    0.03250    0.02599 =
         0.02168    0.01115    0.00633    0.00670
AFIX  43
H4A   2    0.389373    0.181116    0.601065    21.00000   -1.20000
AFIX  65
C5A   1    0.499053    0.233320    0.559558    21.00000    0.02839    0.03882 =
         0.02271    0.01494   -0.00006    0.00747
AFIX  43
H5A   2    0.545540    0.231982    0.598781    21.00000   -1.20000
AFIX  65
C6A   1    0.523800    0.265493    0.500812    21.00000    0.02100    0.02847 =
         0.01910    0.00715   -0.00021    0.00363
AFIX  43
H6A   2    0.587202    0.286144    0.499884    21.00000   -1.20000
AFIX   0
PART    2
rem same_24 0.01 Pa > C6a
PB    6    0.482625    0.305873    0.362780   -21.00000    0.01187    0.01522 =
         0.01716    0.00284    0.00247    0.00255
AFIX  66
C18B  1    0.632654    0.414041    0.448297   -21.00000    0.02022    0.02546 =
         0.03215   -0.00444   -0.00157   -0.00212
AFIX  43
H18B  2    0.588118    0.430784    0.478500   -21.00000   -1.20000
AFIX  65
C17B  1    0.725711    0.449627    0.466260   -21.00000    0.02562    0.03064 =
         0.05485    0.00008   -0.00895   -0.00689
AFIX  43
H17B  2    0.744776    0.490690    0.508740   -21.00000   -1.20000
AFIX  65
C16B  1    0.790875    0.425131    0.422067   -21.00000    0.01778    0.03012 =
         0.07206    0.01364   -0.00043   -0.00666
AFIX  43
H16B  2    0.854475    0.449452    0.434345   -21.00000   -1.20000
AFIX  65
C15B  1    0.762981    0.365048    0.359912   -21.00000    0.02611    0.03457 =
         0.06659    0.02025    0.02177    0.00284
AFIX  43
H15B  2    0.807517    0.348307    0.329709   -21.00000   -1.20000
AFIX  65
C14B  1    0.669924    0.329462    0.341948   -21.00000    0.02157    0.01557 =
         0.03697    0.00729    0.00701    0.00259
AFIX  43
H14B  2    0.650860    0.288399    0.299468   -21.00000   -1.20000
AFIX  65
C13B  1    0.604759    0.353958    0.386140   -21.00000    0.01534    0.01510 =
         0.02017    0.00171    0.00189   -0.00031
AFIX  66
C7B   1    0.425192    0.389504    0.364757   -21.00000    0.01483    0.01323 =
         0.01840    0.00126    0.00172    0.00305
C8B   1    0.378252    0.418780    0.422192   -21.00000    0.02367    0.01724 =
         0.01985    0.00271    0.00620    0.00627
AFIX  43
H8B   2    0.372839    0.394017    0.462532   -21.00000   -1.20000
AFIX  65
C9B   1    0.339234    0.484289    0.420604   -21.00000    0.02369    0.01919 =
         0.02727    0.00093    0.00669    0.00724
AFIX  43
H9B   2    0.307153    0.504298    0.459858   -21.00000   -1.20000
AFIX  65
C10B  1    0.347154    0.520521    0.361580   -21.00000    0.02363    0.01438 =
         0.03237    0.00292   -0.00082    0.00598
AFIX  43
H10B  2    0.320486    0.565293    0.360495   -21.00000   -1.20000
AFIX  65
C11B  1    0.394092    0.491246    0.304144   -21.00000    0.02990    0.02201 =
         0.02875    0.00877    0.00651    0.00867
AFIX  43
H11B  2    0.399505    0.516009    0.263804   -21.00000   -1.20000
AFIX  65
C12B  1    0.433112    0.425737    0.305732   -21.00000    0.02545    0.01848 =
         0.02494    0.00572    0.00733    0.00709
AFIX  43
H12B  2    0.465192    0.405729    0.266477   -21.00000   -1.20000
AFIX  66
C1B   1    0.455184    0.297224    0.451359   -21.00000    0.01727    0.02738 =
         0.01223    0.00020    0.00304   -0.00268
C2B   1    0.453335    0.356010    0.512193   -21.00000    0.03032    0.03877 =
         0.01967   -0.00889    0.01008   -0.00782
AFIX  43
H2B   2    0.466328    0.408353    0.508330   -21.00000   -1.20000
AFIX  65
C3B   1    0.432477    0.338210    0.578678   -21.00000    0.04346    0.06474 =
         0.01776   -0.00927    0.01309   -0.01599
AFIX  43
H3B   2    0.431214    0.378389    0.620255   -21.00000   -1.20000
AFIX  65
C4B   1    0.413466    0.261624    0.584330   -21.00000    0.04568    0.07985 =
         0.01911    0.00935    0.01026   -0.01948
AFIX  43
H4B   2    0.399210    0.249460    0.629770   -21.00000   -1.20000
AFIX  65
C5B   1    0.415314    0.202837    0.523497   -21.00000    0.04937    0.05185 =
         0.02630    0.01449    0.01028   -0.01066
AFIX  43
H5B   2    0.402321    0.150494    0.527360   -21.00000   -1.20000
AFIX  65
C6B   1    0.436172    0.220636    0.457011   -21.00000    0.02854    0.03384 =
         0.01921    0.00340    0.00659   -0.00502
AFIX  43
H6B   2    0.437435    0.180458    0.415434   -21.00000   -1.20000

AFIX   0
HKLF 4


REM  X4ESxT-23May085352_a.res in P-1
REM wR2 = 0.0737, GooF = S = 1.050, Restrained GooF = 1.059 for all data
REM R1 = 0.0295 for 39404 Fo > 4sig(Fo) and 0.0310 for all 41421 data
REM 1193 parameters refined using 190 restraints

END

WGHT      0.0209      5.7804

REM Highest difference peak  2.362,  deepest hole -2.224,  1-sigma level  0.114
Q1    1   0.4248  0.2114  0.2279  11.00000  0.05    2.36
Q2    1   0.9848  0.2963  0.7393  11.00000  0.05    2.14
Q3    1   0.2859  0.4298  0.0608  11.00000  0.05    1.91
Q4    1   0.4214  0.2456  0.2684  11.00000  0.05    1.80
Q5    1   0.9645  0.3145  0.7027  11.00000  0.05    1.65
Q6    1   0.4231  0.2519  0.2967  11.00000  0.05    1.64
Q7    1   0.4395  0.2091  0.2725  11.00000  0.05    1.46
Q8    1   0.9515  0.2221  0.6708  11.00000  0.05    1.33
Q9    1   0.1755  0.4798  0.1361  11.00000  0.05    1.32
Q10   1   0.2007  0.4462  0.1408  11.00000  0.05    1.15
Q11   1   0.9562  0.2223  0.6988  11.00000  0.05    1.07
Q12   1   0.9797  0.3321  0.7387  11.00000  0.05    1.07
Q13   1   0.4585  0.2821  0.2911  11.00000  0.05    1.02
Q14   1   0.4287  0.1693  0.2466  11.00000  0.05    1.01
Q15   1   0.7536  0.3207  0.7044  11.00000  0.05    0.93
Q16   1   0.3851  0.2916  0.0715  11.00000  0.05    0.89
Q17   1   0.9179  0.2410  0.8633  11.00000  0.05    0.86
Q18   1   0.4011  0.1707  0.0635  11.00000  0.05    0.80
Q19   1   0.2172  0.4567  0.1086  11.00000  0.05    0.78
Q20   1   0.2198  0.4799  0.1240  11.00000  0.05    0.77
;
_shelx_res_checksum   92241

_shelx_hkl_file
;
  23   4  -9   32.53    3.98
 -23  -4  10  113.58    8.22
  23   4 -10  121.95    8.65
  23   3  -8   70.75    6.11
 -23  -3   9   37.37    4.09
  23   3  -9   39.45    4.33
 -23  -3  10   90.16    7.01
  23   3 -10   97.08    7.41
 -23  -3  11    2.48    1.32
  23   3 -11    2.31    1.55
  23   2  -7   71.79    6.05
 -23  -2   8   18.81    2.89
  23   2  -8   25.43    3.27
 -23  -2   9   96.52    7.23
  23   2  -9   95.34    7.29
 -23  -2  10  105.34    7.90
  23   2 -10  139.62    9.20
 -23  -2  11   52.90    5.11
  23   2 -11   75.13    6.00
 -23  -2  12  263.07   15.74
  23   2 -12  355.71   19.19
  23   1  -6    5.49    1.89
 -23  -1   7  223.93   13.59
  23   1  -7  257.29   14.76
 -23  -1   8   18.42    2.85
  23   1  -8   22.99    3.11
 -23  -1   9   83.06    6.66
  23   1  -9   97.68    7.18
 -23  -1  10   35.18    3.86
  23   1 -10   32.65    3.84
 -23  -1  11   32.09    3.72
  23   1 -11   33.09    3.86
 -23  -1  12    5.50    1.71
  23   1 -12    6.77    1.93
 -23   0   6    0.90    1.04
  23   0  -6    2.88    1.32
 -23   0   7   81.40    6.45
  23   0  -7   86.05    6.60
 -23   0   8    0.34    0.96
 -23   0   9   80.36    6.52
  23   0  -9   84.18    6.48
 -23   0  10   67.27    5.77
  23   0 -10   67.78    5.74
 -23   0  11   73.31    6.20
  23   0 -11   83.67    6.52
 -23   0  12  131.58    9.27
  23   0 -12  147.07    9.65
 -23   0  13   88.29    7.08
  23   0 -13  101.30    7.44
 -23   1   6   33.98    3.74
  23  -1  -6   29.89    3.54
 -23   1   7  137.94    9.48
  23  -1  -7  156.89    9.97
 -23   1   8    0.14    1.09
  23  -1  -8    0.55    1.03
 -23   1   9   79.57    6.43
  23  -1  -9   79.45    6.35
 -23   1  10    0.49    1.09
  23  -1 -10   -0.08    1.06
 -23   1  11   50.12    4.88
  23  -1 -11   55.47    5.05
  23  -1 -12    5.65    1.90
  23  -1 -13    2.55    1.62
 -23   2   6   13.81    2.44
  23  -2  -6   13.94    2.56
 -23   2   7   67.46    5.82
  23  -2  -7   77.18    6.04
 -23   2   8    2.51    1.27
  23  -2  -8    4.06    1.48
  23  -2  -9  103.00    7.50
 -23   2  10   18.28    2.92
  23  -2 -10   22.21    2.98
 -23   2  11   95.04    7.65
  23  -2 -11  125.72    8.36
 -23   2  12   62.58    5.96
  23  -2 -12   87.59    6.52
  23  -2 -13  156.34   10.32
  23  -3  -6   56.67    5.09
 -23   3   7  179.51   12.11
  23  -3  -7  164.46   10.47
 -23   3   8    8.62    2.04
  23  -3  -8    7.32    2.01
 -23   3   9  111.64    8.33
  23  -3  -9  115.36    8.06
  23  -3 -10    7.12    2.02
 -22  -8   7   19.51    2.98
  22   8  -7   16.02    3.03
 -22  -8   8    0.20    1.03
  22   8  -8    0.98    1.31
 -22  -8   9    3.60    1.53
  22   8  -9    6.58    2.07
  22   8 -10    3.64    1.82
 -22  -7   6   79.77    6.48
  22   7  -6   77.57    6.57
 -22  -7   7   72.82    6.21
  22   7  -7   79.72    6.60
 -22  -7   8    7.23    1.94
  22   7  -8    8.55    2.31
 -22  -7   9  149.39    9.98
  22   7  -9  149.16   10.15
 -22  -7  10    8.76    2.12
  22   7 -10    8.26    2.27
 -22  -7  11  184.49   11.77
  22   7 -11  196.00   12.37
 -22  -7  12   12.32    2.73
  22   7 -12   20.43    3.15
  22   6  -4   70.78    6.21
 -22  -6   5   66.66    5.84
  22   6  -5   70.32    6.08
 -22  -6   6   17.83    2.82
  22   6  -6   14.22    2.79
 -22  -6   7   39.06    4.24
  22   6  -7   40.38    4.42
 -22  -6   8   -0.04    0.88
  22   6  -8   -0.82    1.19
 -22  -6   9   13.30    2.45
  22   6  -9   11.21    2.58
 -22  -6  10   11.04    2.24
  22   6 -10    7.88    2.30
 -22  -6  11    1.42    1.27
 -22  -6  11    0.90    1.36
  22   6 -11    2.29    1.48
 -22  -6  12   -0.25    0.77
 -22  -6  12   -0.62    0.86
  22   6 -12    0.29    1.44
 -22  -6  13   25.13    3.46
 -22  -6  13   25.75    3.26
  22   6 -13   27.24    3.73
  22   5  -3   -0.22    1.07
 -22  -5   4   75.82    6.18
  22   5  -4   70.26    6.11
 -22  -5   5   26.86    3.39
  22   5  -5   25.64    3.56
 -22  -5   6   90.24    7.05
  22   5  -6  100.84    7.58
 -22  -5   7   75.59    6.30
  22   5  -7   84.40    6.71
 -22  -5   8   17.38    2.71
  22   5  -8   15.15    2.79
 -22  -5   9  119.18    8.53
  22   5  -9  135.48    9.25
 -22  -5  10    9.80    2.11
 -22  -5  10    8.73    2.05
  22   5 -10    9.10    2.32
 -22  -5  11  238.27   14.13
 -22  -5  11  228.85   13.28
  22   5 -11  230.75   13.98
 -22  -5  12   -0.36    0.78
 -22  -5  12    0.54    1.16
  22   5 -12   -0.47    1.41
 -22  -5  13  206.41   12.67
 -22  -5  13  198.69   12.00
  22   4  -2  188.90   11.94
 -22  -4   3    2.73    1.27
  22   4  -3    1.97    1.45
 -22  -4   4  210.80   12.82
  22   4  -4  219.43   13.30
 -22  -4   5   22.50    3.03
  22   4  -5   19.16    3.11
 -22  -4   6   65.41    5.63
  22   4  -6   67.18    5.84
 -22  -4   7   27.68    3.38
  22   4  -7   24.24    3.42
 -22  -4   8    7.46    1.90
  22   4  -8   12.33    2.36
 -22  -4   9   72.24    5.96
 -22  -4   9   65.93    5.50
  22   4  -9   82.08    6.45
 -22  -4  10    5.95    1.77
 -22  -4  10    6.45    1.76
  22   4 -10    6.12    1.91
  22   4 -11   10.56    2.34
 -22  -4  12    2.75    1.30
 -22  -4  12    2.88    1.46
  22   4 -12    4.11    1.91
 -22  -4  13   24.79    3.22
 -22  -4  13   21.82    3.00
 -22  -4  14    0.93    1.12
 -22  -4  14    0.29    1.19
  22   3  -1    2.74    1.59
 -22  -3   2   34.49    3.91
  22   3  -2   40.08    4.26
 -22  -3   3    1.03    1.04
  22   3  -3    2.22    1.34
 -22  -3   4   49.74    4.74
  22   3  -4   52.45    4.94
 -22  -3   5   -0.04    0.79
  22   3  -5    1.28    1.29
 -22  -3   6   94.36    7.06
  22   3  -6   91.29    7.07
 -22  -3   7    7.81    1.86
  22   3  -7    7.62    2.04
 -22  -3   8  116.98    8.31
 -22  -3   8  125.16    8.27
  22   3  -8  127.42    8.78
 -22  -3   9  112.01    7.96
 -22  -3   9  103.78    7.35
  22   3  -9  116.89    8.23
 -22  -3  10   85.19    6.69
 -22  -3  10   94.97    6.78
  22   3 -10   94.75    7.20
 -22  -3  11  239.80   14.44
 -22  -3  11  258.41   14.66
  22   3 -11  314.55   17.22
 -22  -3  12   37.93    4.09
 -22  -3  12   37.12    3.91
  22   3 -12   42.17    4.41
 -22  -3  13  201.07   12.35
 -22  -3  13  188.30   11.50
 -22  -3  14    1.95    1.29
 -22  -3  14    2.33    1.38
 -22  -3  15  157.65   10.43
 -22  -3  15  156.01   10.11
 -22  -2   1  135.99    9.14
  22   2  -1  136.33    9.28
 -22  -2   2  165.19   10.53
  22   2  -2  159.90   10.44
 -22  -2   3   32.26    3.67
  22   2  -3   31.78    3.76
 -22  -2   4  212.41   12.90
  22   2  -4  235.02   13.78
 -22  -2   5    1.89    1.13
  22   2  -5    2.92    1.38
 -22  -2   6  167.69   10.74
  22   2  -6  183.73   11.42
 -22  -2   7   15.75    2.40
 -22  -2   7   10.42    2.23
  22   2  -7   11.15    2.32
 -22  -2   8   81.98    6.47
 -22  -2   8   84.19    6.23
 -22  -2   9   55.61    4.96
 -22  -2   9   53.11    4.66
  22   2  -9   46.72    4.74
 -22  -2  10   26.25    3.32
 -22  -2  10   24.31    3.07
  22   2 -10   28.99    3.50
 -22  -2  11    1.48    1.04
 -22  -2  11    0.60    1.21
  22   2 -11    1.66    1.44
 -22  -2  12    3.77    1.46
 -22  -2  12    1.88    1.42
  22   2 -12    3.84    1.72
 -22  -2  13   33.23    3.86
 -22  -2  13   34.46    3.78
  22   2 -13   44.20    4.41
 -22  -2  14    0.89    1.05
 -22  -2  14    0.55    1.22
  22   2 -14    0.94    1.32
  22   2 -15   44.68    4.83
 -22  -1   1    4.02    1.45
  22   1  -1    4.24    1.66
 -22  -1   2   22.71    3.05
  22   1  -2   24.69    3.25
 -22  -1   3    3.56    1.35
  22   1  -3    2.34    1.40
 -22  -1   4   21.04    2.89
  22   1  -4   21.60    3.04
 -22  -1   5    2.18    1.22
  22   1  -5    3.91    1.51
 -22  -1   6  136.38    9.15
  22   1  -6  135.93    9.15
 -22  -1   7    0.49    0.97
 -22  -1   7    0.44    0.92
  22   1  -7    0.21    1.07
 -22  -1   8  239.05   14.09
 -22  -1   8  221.33   12.93
  22   1  -8  248.52   14.33
 -22  -1   9   32.28    3.67
 -22  -1   9   33.05    3.61
  22   1  -9   42.76    4.19
 -22  -1  10  216.69   13.28
 -22  -1  10  199.38   11.85
  22   1 -10  175.71   11.17
 -22  -1  11  115.95    8.24
 -22  -1  11  109.06    7.61
  22   1 -11  116.70    8.17
 -22  -1  12  120.00    8.51
 -22  -1  12  119.00    8.11
  22   1 -12  120.12    8.39
 -22  -1  13   69.13    5.83
 -22  -1  13   60.21    5.27
  22   1 -13   70.23    5.83
 -22  -1  14   17.60    2.85
 -22  -1  14   19.49    2.88
  22   1 -14   21.52    3.12
 -22  -1  15   87.80    6.89
 -22  -1  15   75.27    6.30
  22   1 -15   91.99    6.99
 -22  -1  16    5.43    1.93
 -22  -1  16    4.54    1.77
  22   1 -16    8.02    2.15
 -22   0   1  174.41   10.95
  22   0  -1  171.78   10.94
 -22   0   2   87.88    6.69
  22   0  -2   85.64    6.70
 -22   0   3  104.93    7.58
  22   0  -3  105.64    7.67
 -22   0   4  148.85    9.80
  22   0  -4  155.72    9.99
 -22   0   5   54.75    4.98
  22   0  -5   57.00    5.08
 -22   0   6   70.37    5.75
 -22   0   6   70.61    5.70
  22   0  -6   72.69    5.94
 -22   0   7    5.00    1.54
 -22   0   7    3.86    1.38
  22   0  -7    3.04    1.65
 -22   0   8   59.80    5.29
 -22   0   8   54.89    4.83
  22   0  -8   62.27    5.32
 -22   0   9    0.34    0.95
 -22   0   9   -0.05    0.92
  22   0  -9    0.38    1.22
  22   0 -10   22.22    3.11
 -22   0  11   17.26    2.75
 -22   0  11   18.21    2.68
  22   0 -11   25.23    3.17
 -22   0  12    8.88    1.98
 -22   0  12    7.54    1.91
  22   0 -12   11.05    2.26
 -22   0  13   15.33    2.47
  22   0 -13   10.92    2.51
 -22   0  14    0.35    1.12
  22   0 -14    1.21    1.41
 -22   0  15   17.84    2.82
  22   0 -15   17.51    2.80
 -22   0  16    1.07    1.30
 -22   0  16    3.79    1.54
  22   0 -16    4.50    1.69
 -22   1   1    7.39    1.80
  22  -1  -1    6.73    1.94
 -22   1   2   15.25    2.44
  22  -1  -2   13.86    2.53
 -22   1   3   37.72    4.04
  22  -1  -3   40.90    4.17
 -22   1   4   68.54    5.80
  22  -1  -4   71.56    5.82
 -22   1   5   43.15    4.39
  22  -1  -5   44.14    4.39
 -22   1   6  159.49   10.35
 -22   1   6  144.21    9.30
  22  -1  -6  164.42   10.30
 -22   1   7   11.65    2.24
 -22   1   7   11.59    2.12
  22  -1  -7   12.69    2.41
 -22   1   8  236.45   14.46
 -22   1   8  246.53   13.89
  22  -1  -8  242.13   14.05
 -22   1   9    0.70    0.96
  22  -1  -9    0.71    1.26
 -22   1  10  207.85   12.20
  22  -1 -11   15.05    2.63
 -22   1  12  130.18    8.63
 -22   1  12  121.97    8.92
  22  -1 -12  133.52    8.90
 -22   1  13   19.28    2.95
 -22   1  13   24.64    3.28
  22  -1 -13   27.32    3.28
 -22   1  14   70.65    5.95
 -22   1  14   69.48    6.07
  22  -1 -14   75.68    6.11
 -22   1  15   75.77    6.55
  22  -1 -15   94.43    6.99
 -22   1  16   31.80    3.92
  22  -1 -16   36.05    3.99
 -22   2   1  314.07   17.57
  22  -2  -1  304.08   16.97
 -22   2   2   41.99    4.25
  22  -2  -2   41.30    4.19
 -22   2   3  140.23    9.41
  22  -2  -3  134.96    9.04
 -22   2   4   76.60    6.10
  22  -2  -4   65.93    5.65
 -22   2   5   38.75    4.10
  22  -2  -5   38.37    4.06
 -22   2   6   16.08    2.64
  22  -2  -6   20.85    2.89
 -22   2   7    2.11    1.20
  22  -2  -7    3.23    1.33
 -22   2   8   29.13    3.35
 -22   2   8   32.60    3.82
  22  -2  -8   29.69    3.52
 -22   2   9    0.81    1.09
 -22   2   9    1.83    1.27
  22  -2  -9    0.24    1.04
 -22   2  10   19.33    2.85
 -22   2  10   25.64    3.31
  22  -2 -10   26.25    3.19
 -22   2  11   23.57    3.11
 -22   2  11   25.28    3.38
  22  -2 -11   28.90    3.42
 -22   2  12    1.94    1.25
  22  -2 -12    1.15    1.21
 -22   2  13    0.94    1.22
  22  -2 -13    1.24    1.24
 -22   2  14   11.75    2.42
  22  -2 -14   17.44    2.61
 -22   2  15    7.95    2.07
  22  -2 -15   10.10    2.28
 -22   2  16   11.78    2.51
  22  -2 -16   17.48    2.74
  22  -3  -1   42.80    4.32
 -22   3   2   25.43    3.18
  22  -3  -2   20.54    3.02
 -22   3   3   65.13    5.65
  22  -3  -3   73.51    5.86
  22  -3  -4    8.78    2.15
 -22   3   5   89.91    7.20
  22  -3  -5   82.55    6.41
 -22   3   6  101.83    7.76
  22  -3  -6   98.68    7.19
 -22   3   7   56.49    5.19
  22  -3  -7   50.31    4.72
 -22   3   8  192.99   12.31
  22  -3  -8  200.08   11.97
 -22   3   9   28.23    3.59
  22  -3  -9   30.48    3.55
 -22   3  10  192.08   12.12
  22  -3 -10  195.29   11.77
 -22   3  11    3.09    1.40
  22  -3 -12  250.07   14.45
 -22   3  13   19.74    3.04
  22  -3 -13   23.54    3.09
 -22   3  14  125.38    8.94
  22  -3 -14  136.71    9.08
 -22   3  15   66.82    5.97
  22  -3 -15   81.35    6.33
 -22   3  16   87.73    7.18
  22  -3 -16  109.42    7.72
 -22   4   1  242.21   14.50
  22  -4  -1  240.20   13.93
 -22   4   2    2.02    1.20
  22  -4  -2    3.86    1.55
 -22   4   3  279.05   16.86
  22  -4  -3  239.79   13.98
 -22   4   4   29.54    3.71
  22  -4  -4   31.33    3.54
 -22   4   5  124.16    8.90
  22  -4  -5  127.79    8.55
 -22   4   6   23.77    3.29
  22  -4  -6   24.18    3.15
 -22   4   7   25.47    3.40
  22  -4  -7   25.27    3.22
 -22   4   8   89.22    7.06
  22  -4  -8   96.81    7.01
 -22   4   9    3.29    1.52
  22  -4  -9    3.54    1.44
 -22   4  10   39.88    4.40
  22  -4 -10   50.43    4.60
 -22   4  11    5.13    1.64
  22  -4 -11    3.04    1.47
 -22   4  12    2.70    1.38
  22  -4 -12    3.42    1.56
 -22   4  13   23.09    3.21
  22  -4 -13   22.92    3.14
 -22   4  14   21.35    3.27
  22  -4 -14   33.02    3.58
 -22   4  15    1.74    1.32
  22  -4 -15    1.63    1.42
  22  -4 -16   28.68    3.53
  22  -5  -1    3.02    1.35
 -22   5   2   21.78    3.05
  22  -5  -2   18.27    2.79
 -22   5   3   23.44    3.33
  22  -5  -3   27.71    3.27
 -22   5   4    7.64    1.94
  22  -5  -4    7.47    1.96
 -22   5   5  102.87    7.86
  22  -5  -5  124.54    8.22
 -22   5   6   54.73    5.21
  22  -5  -6   59.44    5.10
 -22   5   7   97.04    7.43
  22  -5  -7   98.39    7.12
 -22   5   8   71.74    6.11
  22  -5  -8   79.91    6.12
 -22   5   9   51.05    4.99
  22  -5  -9   59.99    5.09
 -22   5  10  131.42    9.16
  22  -5 -10  141.59    9.22
 -22   5  11   30.77    3.71
  22  -5 -11   35.61    3.79
 -22   5  12  180.49   11.63
  22  -5 -12  212.03   12.47
 -22   5  13    4.89    1.53
  22  -5 -13    0.37    1.17
 -22   5  14  155.70   10.37
  22  -5 -14  160.24   10.25
 -22   5  15   20.15    3.15
  22  -5 -15   25.55    3.23
 -22   6   1  214.24   13.37
  22  -6  -1  205.04   12.34
  22  -6  -1  222.89   14.43
  22  -6  -1  226.73   14.65
 -22   6   2   24.75    3.31
  22  -6  -2   23.56    3.08
  22  -6  -3  219.68   12.87
 -22   6   4    2.00    1.27
  22  -6  -4    2.03    1.36
 -22   6   5  224.59   13.63
  22  -6  -5  229.21   13.33
 -22   6   6    5.97    1.88
  22  -6  -6    5.70    1.71
 -22   6   7  132.27    9.08
  22  -6  -7  122.48    8.36
 -22   6   8   58.61    5.46
  22  -6  -8   68.12    5.46
 -22   6   9   39.35    4.27
  22  -6  -9   44.26    4.29
 -22   6  10   26.18    3.49
  22  -6 -10   36.32    3.71
 -22   6  11    1.11    1.19
  22  -6 -11    0.88    1.09
 -22   6  12    4.07    1.52
  22  -6 -12    1.73    1.35
 -22   6  13   18.01    2.93
  22  -6 -13   23.79    3.01
  22  -6 -14    3.03    1.51
 -22   7   1   -0.32    1.06
  22  -7  -1    1.78    1.20
  22  -7  -1    1.37    1.40
  22  -7  -1    2.61    1.13
 -22   7   2   -0.19    0.91
  22  -7  -2    1.46    1.18
  22  -7  -2    0.02    0.82
 -22   7   3   17.07    2.90
  22  -7  -3   20.69    2.82
  22  -7  -3   21.94    2.79
 -22   7   4    8.30    1.99
  22  -7  -4    7.72    1.97
 -22   7   5   93.60    7.25
  22  -7  -5  102.31    7.24
 -22   7   6   -0.15    1.06
  22  -7  -6   -0.01    0.90
 -22   7   7   87.87    6.90
  22  -7  -7   88.73    6.64
 -22   7   8    8.12    2.06
  22  -7  -8    8.34    1.92
 -22   7   9   76.10    6.44
  22  -7  -9  100.94    7.06
 -22   7  10   76.17    6.38
  22  -7 -10   90.12    6.60
 -22   7  11   87.78    6.98
  22  -7 -11  107.47    7.43
 -22   7  12  150.40   10.07
  22  -7 -12  163.53   10.21
 -22   8   1  115.64    8.44
  22  -8  -1  127.88    8.48
  22  -8  -1  128.35    9.26
  22  -8  -1  117.45    8.71
 -22   8   2  133.60    9.26
  22  -8  -2  122.15    8.48
  22  -8  -2  155.63   10.61
  22  -8  -2  145.49   10.17
 -22   8   3  194.59   12.13
  22  -8  -3  190.50   11.58
  22  -8  -3  195.66   13.02
  22  -8  -3  193.91   13.00
  22  -8  -4   66.23    5.49
 -22   8   5  277.69   16.18
  22  -8  -5  296.16   16.37
 -22   8   6    1.97    1.21
  22  -8  -6    1.33    1.24
 -22   8   7  142.41    9.75
  22  -8  -7  168.01   10.33
 -22   8   8    9.56    2.24
  22  -8  -8   16.01    2.47
 -22   8   9   59.65    5.41
  22  -8  -9   63.06    5.33
 -22   8  10    2.37    1.35
  22  -8 -10    1.98    1.24
 -22   9   1    8.30    2.21
  22  -9  -1    9.18    2.08
  22  -9  -1   14.44    2.43
  22  -9  -1   10.51    2.05
 -22   9   2    8.15    2.01
  22  -9  -2    6.92    1.84
  22  -9  -2    6.94    1.74
 -22   9   3   11.65    2.33
  22  -9  -3   10.00    2.29
  22  -9  -3   15.34    2.46
  22  -9  -3   14.58    2.30
 -22   9   4    2.97    1.41
  22  -9  -4    3.75    1.48
 -22   9   5   73.38    6.17
  22  -9  -5   77.89    6.04
 -22   9   6    6.65    1.95
  22  -9  -6    8.07    1.91
 -22   9   7   62.09    5.58
  22  -9  -7   70.95    5.64
  22  -9  -8    1.13    1.21
  22 -10  -1   12.42    2.36
  22 -10  -1   11.76    2.37
  22 -10  -2  177.76   12.07
  22 -10  -2  151.57   10.89
  22 -10  -3   72.46    6.06
  22 -10  -3   63.00    5.67
  22 -11  -1   19.85    2.95
  22 -11  -1   16.45    2.68
  22 -11  -2    5.08    1.84
  22 -11  -2    7.05    1.81
  22 -11  -3   44.13    4.41
  22 -11  -3   40.64    4.33
  22 -12  -1   16.04    2.65
  22 -12  -2  232.88   15.13
  22 -12  -2  188.62   13.16
  22 -12  -3    9.95    2.19
  22 -12  -3    7.31    2.02
  22 -13  -1    2.31    1.68
  22 -13  -1    3.67    1.48
  22 -13  -2    0.52    1.53
  22 -13  -2    2.38    1.26
  22 -13  -3    1.21    1.45
  22 -13  -3    0.92    1.28
  22 -14  -1   36.29    4.03
  22 -14  -1   31.68    3.79
  22 -14  -2  184.29   12.57
  22 -14  -2  170.50   12.04
  21  11  -6   25.49    3.85
 -21 -11   7    3.53    1.70
  21  11  -7    3.09    1.79
 -21 -11   8    1.58    1.36
  21  11  -8    1.73    1.56
 -21 -10   5    2.94    1.53
  21  10  -5    2.76    1.64
 -21 -10   6  173.43   11.36
  21  10  -6  178.30   11.73
 -21 -10   7   -0.38    1.12
  21  10  -7   -1.64    1.18
 -21 -10   8  150.77   10.30
  21  10  -8  162.47   10.95
 -21 -10   9   25.21    3.49
  21  10  -9   25.52    3.76
 -21 -10  10   51.98    5.28
 -21 -10  10   56.50    4.98
  21  10 -10   64.39    5.97
 -21 -10  11   46.12    4.45
 -21  -9   4   24.74    3.50
  21   9  -4   29.09    3.76
 -21  -9   5    6.38    1.85
  21   9  -5    5.76    1.99
 -21  -9   6    4.67    1.74
  21   9  -6    4.37    1.83
 -21  -9   7    1.34    1.38
  21   9  -7    0.69    1.34
 -21  -9   8    3.52    1.52
 -21  -9   8    3.32    1.54
  21   9  -8    4.38    1.81
 -21  -9   9    2.74    1.48
 -21  -9   9    4.20    1.54
  21   9  -9    3.86    1.88
 -21  -9  10   10.38    2.08
 -21  -9  11    3.32    1.64
 -21  -9  11    3.00    1.58
  21   9 -11    5.60    1.97
 -21  -9  12   26.54    3.59
 -21  -9  12   25.23    3.25
  21   9 -12   29.03    3.94
 -21  -9  13   28.44    3.78
 -21  -9  13   28.89    3.51
  21   8  -2    0.59    1.28
 -21  -8   3   68.41    6.04
  21   8  -3   78.08    6.48
 -21  -8   4   90.03    7.08
 -21  -8   5   57.60    5.34
  21   8  -5   59.23    5.53
 -21  -8   6  137.72    9.47
  21   8  -6  141.64    9.75
 -21  -8   7   43.64    4.50
 -21  -8   7   44.41    4.29
  21   8  -7   48.07    4.88
 -21  -8   8  188.59   11.79
 -21  -8   8  171.96   10.67
  21   8  -8  180.58   11.60
 -21  -8   9    2.39    1.25
 -21  -8  10  162.08   10.57
 -21  -8  10  153.18    9.72
  21   8 -10  146.14   10.14
 -21  -8  11   23.81    3.27
 -21  -8  11   23.19    3.06
  21   8 -11   24.13    3.54
 -21  -8  12   96.73    7.39
 -21  -8  12   91.37    6.79
  21   8 -12   89.51    7.34
 -21  -8  13   25.65    3.30
 -21  -8  13   17.82    2.92
  21   8 -13   19.86    3.32
 -21  -8  14   20.45    3.07
 -21  -8  14   16.63    2.79
 -21  -7   1  136.68    9.35
  21   7  -1  130.68    9.23
 -21  -7   2    3.71    1.53
  21   7  -2    5.56    1.90
 -21  -7   3   53.62    5.06
  21   7  -3   58.29    5.46
 -21  -7   4   46.82    4.63
  21   7  -4   43.44    4.69
 -21  -7   5   21.90    3.08
  21   7  -5   18.39    3.25
 -21  -7   6   25.62    3.26
 -21  -7   6   20.36    2.90
  21   7  -6   25.19    3.52
 -21  -7   7    1.92    1.20
 -21  -7   7    2.23    1.28
  21   7  -7    1.13    1.53
 -21  -7   8    0.89    1.00
 -21  -7   9    4.22    1.56
 -21  -7   9    4.75    1.55
  21   7  -9    4.39    1.89
 -21  -7  10   24.10    3.32
 -21  -7  10   25.51    3.13
  21   7 -10   27.38    3.68
 -21  -7  11   -0.20    0.99
 -21  -7  11    0.81    1.05
  21   7 -11    0.47    1.26
 -21  -7  12   37.58    4.13
 -21  -7  12   37.30    3.90
 -21  -7  13    2.22    1.45
 -21  -7  13    3.83    1.39
  21   7 -13    2.24    1.60
 -21  -7  14   67.98    5.86
 -21  -7  14   62.74    5.45
  21   7 -14   70.48    6.17
 -21  -6   1   50.42    4.79
  21   6  -1   42.62    4.65
 -21  -6   2   12.85    2.36
  21   6  -2   11.79    2.48
 -21  -6   3  129.07    8.92
  21   6  -3  133.54    9.26
 -21  -6   4   29.04    3.55
  21   6  -4   26.51    3.61
 -21  -6   5  213.09   12.99
 -21  -6   5  211.67   12.46
  21   6  -5  231.17   13.83
 -21  -6   6  107.07    7.76
 -21  -6   6   96.85    7.01
  21   6  -6  101.58    7.97
 -21  -6   7  103.09    7.24
 -21  -6   8  175.16   11.12
 -21  -6   8  163.28   10.25
  21   6  -8  184.79   11.64
 -21  -6   9    2.74    1.23
 -21  -6   9    2.60    1.31
  21   6  -9    0.86    1.51
 -21  -6  10  176.07   11.16
 -21  -6  10  163.70   10.31
  21   6 -10  196.95   12.14
 -21  -6  11    3.96    1.48
 -21  -6  11    4.09    1.54
  21   6 -11    3.33    1.84
 -21  -6  12   92.31    7.08
 -21  -6  12   87.51    6.57
  21   6 -12   95.31    7.36
 -21  -6  13   18.03    2.72
 -21  -6  13   15.33    2.60
 -21  -6  14   58.14    5.25
 -21  -6  14   50.00    4.76
  21   6 -14   61.90    5.60
 -21  -6  15   55.70    5.05
 -21  -6  15   45.19    4.68
 -21  -5   1   99.91    7.34
  21   5  -1   87.97    7.09
 -21  -5   2    0.05    0.88
  21   5  -2    0.77    1.16
 -21  -5   3   83.99    6.57
  21   5  -3   77.39    6.47
 -21  -5   4   28.68    3.47
 -21  -5   4   28.10    3.25
  21   5  -4   26.15    3.56
 -21  -5   5   57.98    5.16
 -21  -5   5   51.08    4.64
  21   5  -5   53.31    5.26
 -21  -5   6    9.59    1.99
 -21  -5   7    4.20    1.52
 -21  -5   7    3.28    1.44
 -21  -5   8    2.19    1.08
 -21  -5   8    0.14    0.97
  21   5  -8    1.59    1.33
 -21  -5   9    8.22    1.97
 -21  -5   9    8.97    1.93
  21   5  -9    8.76    2.21
 -21  -5  10    0.79    1.05
 -21  -5  10    0.94    1.06
  21   5 -10   -0.70    1.14
 -21  -5  11   12.07    2.30
 -21  -5  11   11.26    2.22
  21   5 -11   14.15    2.58
 -21  -5  12    8.46    1.99
 -21  -5  12   10.44    2.01
  21   5 -12   10.48    2.43
 -21  -5  13    3.74    1.51
 -21  -5  13    4.06    1.56
  21   5 -13    4.21    1.75
 -21  -5  14   32.24    3.68
 -21  -5  14   27.82    3.44
  21   5 -14   33.42    3.98
  21   5 -15   15.75    2.89
 -21  -5  16   36.02    4.01
 -21  -4   1   49.50    4.69
  21   4  -1   45.77    4.71
 -21  -4   2   15.30    2.51
  21   4  -2   14.34    2.68
 -21  -4   3  118.37    8.28
 -21  -4   3  117.74    7.97
  21   4  -3  125.92    8.74
 -21  -4   4    6.62    1.76
 -21  -4   4    6.45    1.68
  21   4  -4    4.81    1.88
 -21  -4   5  157.66    9.81
 -21  -4   6    6.01    1.64
 -21  -4   6    6.47    1.63
  21   4  -6    6.04    1.97
 -21  -4   7  132.64    8.93
 -21  -4   7  123.87    8.23
  21   4  -7  132.86    9.07
 -21  -4   8   45.80    4.40
 -21  -4   8   40.26    4.00
 -21  -4   9   53.97    4.98
 -21  -4   9   57.39    4.89
  21   4  -9   60.10    5.38
 -21  -4  10  138.48    9.28
 -21  -4  10  131.15    8.67
  21   4 -10  149.07    9.79
 -21  -4  11   41.04    4.27
 -21  -4  11   41.61    4.11
  21   4 -11   48.03    4.66
 -21  -4  12  170.52   10.78
 -21  -4  12  157.97   10.02
  21   4 -12  174.95   11.05
 -21  -4  13    1.50    1.14
 -21  -4  13    1.77    1.24
  21   4 -13    2.31    1.61
 -21  -4  14  150.77    9.99
 -21  -4  14  148.98    9.69
  21   4 -14  169.33   10.76
 -21  -4  15   32.54    3.70
 -21  -4  15   28.14    3.55
  21   4 -15   33.92    3.97
 -21  -4  16   70.25    5.94
 -21  -4  16   65.25    5.87
  21   4 -16   81.93    6.56
 -21  -3   1   86.68    6.67
  21   3  -1   83.55    6.69
 -21  -3   2   14.11    2.45
 -21  -3   2   13.59    2.29
  21   3  -2   13.96    2.57
 -21  -3   3  113.46    7.98
 -21  -3   3  105.38    7.36
  21   3  -3  115.20    8.20
 -21  -3   4    0.13    0.96
 -21  -3   5   79.35    6.28
 -21  -3   5   74.65    5.83
  21   3  -5   83.44    6.56
 -21  -3   6    8.45    1.81
 -21  -3   6    5.94    1.64
  21   3  -6    7.51    2.01
 -21  -3   7   35.29    3.80
 -21  -3   7   31.20    3.46
  21   3  -7   34.52    3.89
 -21  -3   8   18.07    2.66
 -21  -3   8   14.78    2.47
  21   3  -8   18.79    2.90
 -21  -3   9    3.44    1.20
 -21  -3   9    1.29    1.10
  21   3  -9    0.39    1.27
  21   3 -10    9.35    2.17
 -21  -3  11    2.02    1.21
 -21  -3  11    1.99    1.18
  21   3 -11    3.36    1.52
 -21  -3  12    3.37    1.46
 -21  -3  12    3.40    1.39
  21   3 -12    5.73    1.70
 -21  -3  13    1.56    1.12
 -21  -3  13    2.08    1.28
  21   3 -13    1.24    1.29
 -21  -3  14   17.37    2.78
 -21  -3  14   18.46    2.82
  21   3 -14   27.64    3.34
 -21  -3  15    8.80    2.01
 -21  -3  15    8.37    2.04
  21   3 -15   10.61    2.27
 -21  -3  16   43.19    4.48
 -21  -3  16   45.48    4.62
  21   3 -16   58.12    5.14
 -21  -3  17   16.80    2.68
 -21  -3  17   15.98    2.82
 -21  -2   1   57.01    5.13
 -21  -2   1   57.59    4.91
  21   2  -1   59.00    5.34
 -21  -2   2    6.07    1.64
 -21  -2   2    4.14    1.50
  21   2  -2    4.71    1.74
 -21  -2   3   85.55    6.29
 -21  -2   4    1.21    0.96
 -21  -2   4    0.96    0.96
  21   2  -4    1.20    1.24
 -21  -2   5   57.73    5.24
 -21  -2   5   65.72    5.25
  21   2  -5   69.70    5.72
 -21  -2   6    0.34    0.76
 -21  -2   6    0.17    0.96
  21   2  -6    0.28    1.20
 -21  -2   7  132.52    8.92
 -21  -2   7  129.90    8.44
  21   2  -7  127.71    8.76
 -21  -2   8   19.42    2.82
 -21  -2   8   19.51    2.65
  21   2  -8   20.70    2.99
 -21  -2   9  215.49   13.00
 -21  -2   9  207.93   12.24
  21   2  -9  234.78   13.65
 -21  -2  10   99.85    7.34
 -21  -2  10   95.55    6.86
  21   2 -10  108.82    7.67
 -21  -2  11  136.63    9.26
 -21  -2  11  124.54    8.41
  21   2 -11  150.88    9.63
 -21  -2  12  176.59   11.39
 -21  -2  12  189.24   11.51
  21   2 -12  213.94   12.60
 -21  -2  13   36.87    3.95
 -21  -2  13   32.74    3.68
  21   2 -13   37.44    4.06
 -21  -2  14  117.49    8.53
 -21  -2  14  125.35    8.52
  21   2 -14  151.85    9.76
 -21  -2  15   -0.25    0.90
 -21  -2  15   -1.10    0.82
 -21  -2  16  103.27    7.64
 -21  -2  16   91.33    7.10
  21   2 -16  101.25    7.52
 -21  -2  17    0.20    1.13
 -21  -2  17    0.35    1.08
  21   2 -17    1.83    1.49
 -21  -1   1   23.53    3.11
 -21  -1   1   23.49    2.95
  21   1  -1   24.24    3.24
 -21  -1   2   29.20    3.48
 -21  -1   2   26.19    3.13
 -21  -1   3   93.00    6.73
  21   1  -3  105.76    7.57
 -21  -1   4   20.93    2.93
 -21  -1   4   24.44    2.86
  21   1  -4   21.71    3.08
 -21  -1   5  128.38    8.62
 -21  -1   5  109.50    7.61
  21   1  -5  126.51    8.58
 -21  -1   6   10.14    2.04
 -21  -1   6    9.53    1.94
  21   1  -6   10.57    2.18
 -21  -1   7   54.27    4.87
 -21  -1   7   49.00    4.45
  21   1  -7   57.41    5.02
 -21  -1   8    1.05    1.06
 -21  -1   8    0.85    0.97
  21   1  -8    1.55    1.39
 -21  -1   9    2.17    1.24
 -21  -1   9    0.61    1.05
  21   1  -9    2.97    1.33
 -21  -1  10    5.52    1.58
 -21  -1  10    3.54    1.51
 -21  -1  11    2.37    1.31
 -21  -1  11    1.35    1.27
  21   1 -11    2.88    1.37
 -21  -1  12   18.37    2.77
 -21  -1  12   18.00    2.69
  21   1 -12   21.29    2.92
 -21  -1  13    0.58    1.02
 -21  -1  13    1.01    1.15
  21   1 -13    0.61    1.14
 -21  -1  14   26.00    3.33
 -21  -1  14   23.51    3.11
  21   1 -14   23.67    3.23
 -21  -1  15    3.55    1.43
  21   1 -15    3.73    1.73
 -21  -1  16   65.93    5.69
 -21  -1  17    3.54    1.61
  21   1 -17    3.36    1.82
 -21  -1  18  119.49    8.73
 -21   0   1   19.07    2.77
 -21   0   1   20.04    2.62
  21   0  -1   17.34    2.86
 -21   0   2    9.88    1.90
 -21   0   3   52.22    4.87
 -21   0   3   54.93    4.69
  21   0  -3   56.06    5.00
 -21   0   4   21.81    2.93
 -21   0   4   21.98    2.74
  21   0  -4   19.29    2.90
 -21   0   5  145.58    9.68
 -21   0   5  141.39    9.06
  21   0  -5  164.80   10.20
 -21   0   6   24.74    3.20
 -21   0   6   25.69    3.04
  21   0  -6   24.56    3.20
 -21   0   7  260.76   15.29
 -21   0   7  245.47   14.00
  21   0  -7  279.47   15.58
 -21   0   8    2.89    1.50
 -21   0   8    3.82    1.37
  21   0  -8    5.20    1.60
 -21   0   9  228.73   14.16
 -21   0   9  236.45   13.52
  21   0  -9  280.26   15.48
 -21   0  10   63.83    5.33
  21   0 -10   77.67    6.00
  21   0 -11  194.35   11.79
 -21   0  12   48.40    4.49
 -21   0  12   49.75    4.94
  21   0 -12   51.35    4.73
 -21   0  13   52.92    4.80
 -21   0  13   51.71    5.10
  21   0 -13   57.22    5.04
 -21   0  14  101.89    7.45
 -21   0  14  106.17    8.04
  21   0 -14  119.99    8.15
 -21   0  15   38.69    4.20
 -21   0  15   40.97    4.45
  21   0 -15   49.84    4.64
 -21   0  16   75.58    6.12
 -21   0  16   70.67    6.15
 -21   0  17   25.49    3.50
 -21   0  17   26.85    3.52
  21   0 -17   29.91    3.65
 -21   0  18   71.31    6.24
 -21   0  18   74.32    6.34
 -21   1   1   27.54    3.40
 -21   1   1   24.09    2.98
 -21   1   2   94.21    6.68
 -21   1   3   73.19    5.98
 -21   1   3   68.95    5.45
  21  -1  -3   72.77    5.88
 -21   1   4   66.87    5.53
 -21   1   4   55.86    4.81
  21  -1  -4   59.69    5.21
  21  -1  -5   13.32    2.38
 -21   1   6    4.41    1.42
 -21   1   6    3.00    1.20
  21  -1  -6    2.37    1.55
 -21   1   7    2.28    1.18
  21  -1  -7    3.33    1.52
 -21   1   8   12.68    2.22
 -21   1   8   12.48    2.37
  21  -1  -8   13.90    2.40
 -21   1   9    1.01    1.02
 -21   1   9    2.06    1.28
  21  -1  -9    1.91    1.23
 -21   1  10    2.61    1.27
 -21   1  10    2.60    1.30
  21  -1 -10    1.68    1.40
 -21   1  11    7.73    1.84
 -21   1  11    6.19    1.91
  21  -1 -11    7.70    1.89
 -21   1  12    6.77    1.80
 -21   1  12    5.38    1.77
  21  -1 -12    8.49    1.99
 -21   1  13   27.48    3.31
 -21   1  13   26.49    3.51
  21  -1 -13   30.54    3.56
 -21   1  14    7.22    1.90
 -21   1  14    7.03    1.95
  21  -1 -14    8.04    2.05
 -21   1  15   41.91    4.28
 -21   1  15   35.24    4.17
  21  -1 -15   52.02    4.65
 -21   1  16   53.63    5.17
 -21   1  16   56.73    5.37
  21  -1 -16   75.78    5.90
 -21   1  17   32.56    3.97
 -21   1  17   32.47    3.95
  21  -1 -17   42.70    4.27
 -21   1  18  109.69    8.26
  21  -1 -18  125.55    8.64
 -21   2   1    9.12    1.86
 -21   2   2  115.35    8.34
 -21   2   2  115.76    7.74
  21  -2  -2  121.03    8.27
 -21   2   3   15.86    2.60
 -21   2   3   16.81    2.43
  21  -2  -3   19.91    2.83
 -21   2   4   97.62    7.44
 -21   2   4  109.35    7.32
  21  -2  -4  105.54    7.52
 -21   2   5   74.97    5.71
  21  -2  -5   76.86    5.97
 -21   2   6   82.56    6.12
 -21   2   6   83.36    6.75
  21  -2  -6   86.57    6.51
 -21   2   7  213.08   12.45
 -21   2   7  224.20   13.80
  21  -2  -7  239.86   13.70
 -21   2   8   34.47    3.59
 -21   2   8   35.19    4.00
  21  -2  -8   36.37    3.84
 -21   2   9  177.79   10.76
 -21   2   9  190.20   11.98
  21  -2  -9  181.48   11.16
 -21   2  10    1.62    1.03
 -21   2  10    1.13    1.24
  21  -2 -10    1.69    1.31
 -21   2  11  214.91   12.73
 -21   2  11  221.21   13.60
  21  -2 -11  252.29   14.24
 -21   2  12    8.67    1.90
 -21   2  12    7.63    2.07
  21  -2 -12    8.91    2.09
 -21   2  13  155.37    9.92
 -21   2  13  152.18   10.26
  21  -2 -13  167.20   10.43
 -21   2  14  101.00    7.36
 -21   2  14  104.24    7.75
  21  -2 -14  100.38    7.36
 -21   2  15  122.26    8.59
 -21   2  15  131.56    9.21
  21  -2 -15  148.76    9.54
 -21   2  16   54.65    5.19
 -21   2  16   56.92    5.44
  21  -2 -16   66.92    5.58
 -21   2  17   42.93    4.57
 -21   2  18   16.48    2.89
 -21   2  18   15.60    2.86
  21  -2 -18   20.20    3.03
 -21   3   1    5.74    1.50
 -21   3   1    4.05    1.05
 -21   3   1    3.75    1.03
  21  -3  -1    6.90    1.30
  21  -3  -1    6.55    1.20
  21  -3  -2  201.23   12.09
 -21   3   3   11.09    1.96
  21  -3  -3   10.54    2.17
 -21   3   4  107.36    7.33
 -21   3   4  107.25    8.04
  21  -3  -4  116.35    7.92
 -21   3   5   10.59    2.02
 -21   3   5   13.50    2.48
  21  -3  -5   11.99    2.22
  21  -3  -6   28.48    3.36
 -21   3   7   18.22    2.56
 -21   3   7   21.45    3.00
  21  -3  -7   19.74    2.80
 -21   3   8    1.26    1.00
 -21   3   8    1.49    1.24
  21  -3  -8    0.88    1.10
 -21   3   9   24.14    3.01
 -21   3   9   25.63    3.37
  21  -3  -9   24.05    3.15
 -21   3  10    3.50    1.35
 -21   3  10    4.21    1.59
  21  -3 -10    3.15    1.44
 -21   3  11   11.22    2.14
 -21   3  11   11.48    2.30
  21  -3 -11   13.90    2.32
 -21   3  12   13.58    2.47
 -21   3  12   20.44    2.92
  21  -3 -12   15.48    2.70
 -21   3  13   67.52    5.66
 -21   3  13   68.58    5.98
  21  -3 -13   76.25    5.97
 -21   3  14    8.53    1.97
 -21   3  14    6.69    2.03
  21  -3 -14    9.17    1.99
 -21   3  15   82.44    6.51
 -21   3  16   35.75    4.08
 -21   3  16   30.75    3.94
  21  -3 -16   56.44    4.98
 -21   3  17   74.10    6.32
 -21   3  17   72.60    6.26
  21  -3 -17   84.65    6.51
 -21   3  18   82.75    6.90
 -21   3  18   80.32    6.78
  21  -3 -18  105.66    7.49
 -21   4   1    8.37    1.85
 -21   4   1    9.45    1.64
 -21   4   1    7.53    1.53
  21  -4  -1   10.28    1.84
  21  -4  -1   11.09    1.71
 -21   4   2   26.75    3.02
 -21   4   2   22.86    2.63
 -21   4   2   19.64    2.52
  21  -4  -2   32.03    3.00
  21  -4  -2   33.39    3.05
 -21   4   3    7.89    1.76
 -21   4   3   11.53    2.20
  21  -4  -3    7.94    1.96
 -21   4   4  114.86    7.65
 -21   4   4  109.71    8.16
  21  -4  -4  119.85    8.09
 -21   4   5   15.88    2.34
 -21   4   5   14.08    2.60
  21  -4  -5   17.87    2.65
 -21   4   6  172.15   10.42
 -21   4   6  175.14   11.27
  21  -4  -6  180.84   11.02
 -21   4   7   70.59    5.50
 -21   4   7   70.84    6.03
  21  -4  -7   73.04    5.81
 -21   4   8   98.08    7.02
 -21   4   8  113.51    8.12
  21  -4  -8  109.83    7.65
 -21   4   9   73.78    5.84
 -21   4   9   82.85    6.62
  21  -4  -9   87.63    6.47
 -21   4  10   79.32    6.05
 -21   4  10   75.26    6.32
  21  -4 -10   80.18    6.20
 -21   4  11  172.81   10.70
 -21   4  11  182.67   11.55
  21  -4 -11  178.08   10.98
 -21   4  12    0.61    0.93
 -21   4  12    1.22    1.17
  21  -4 -12    1.01    1.26
 -21   4  13  187.96   11.52
 -21   4  15  196.91   12.22
 -21   4  15  197.45   12.43
  21  -4 -15  235.89   13.55
 -21   4  16   22.19    3.27
 -21   4  16   22.12    3.23
  21  -4 -16   31.09    3.51
 -21   4  17   11.38    2.38
  21  -4 -17   10.24    2.26
 -21   4  18   49.40    5.14
  21  -4 -18   65.46    5.51
 -21   5   1   28.28    3.18
 -21   5   1   27.81    3.13
  21  -5  -1   29.09    3.30
  21  -5  -1   30.76    3.27
 -21   5   2  171.85   10.18
 -21   5   2  150.18   10.32
 -21   5   2  127.61    9.27
  21  -5  -2  171.10   11.26
  21  -5  -2  176.87   11.54
 -21   5   3    7.91    1.78
 -21   5   3    5.50    1.36
  21  -5  -3    8.02    1.99
  21  -5  -3   10.43    1.61
  21  -5  -3   10.53    1.56
 -21   5   4  110.08    7.47
 -21   5   4  110.07    8.13
  21  -5  -4  120.98    8.13
 -21   5   5   -0.76    0.76
 -21   5   5    0.96    1.15
  21  -5  -5    0.98    1.01
 -21   5   6   63.43    5.23
 -21   5   6   76.91    6.20
  21  -5  -6   71.60    5.72
 -21   5   7   20.35    2.75
 -21   5   7   22.20    3.16
  21  -5  -7   26.92    3.14
 -21   5   8   19.23    2.59
 -21   5   8   16.47    2.78
  21  -5  -8   20.04    2.80
 -21   5   9   34.08    3.68
 -21   5   9   35.92    4.09
  21  -5  -9   42.68    4.05
 -21   5  10    1.21    1.20
  21  -5 -10    3.18    1.34
 -21   5  11    0.89    0.93
 -21   5  12   51.24    4.69
 -21   5  12   50.02    4.95
 -21   5  13   27.53    3.35
 -21   5  13   27.73    3.50
  21  -5 -13   29.38    3.48
 -21   5  14   11.36    2.29
 -21   5  14   10.15    2.26
  21  -5 -14   13.28    2.39
 -21   5  15   30.47    3.79
  21  -5 -15   44.51    4.21
 -21   5  16   25.51    3.46
  21  -5 -16   31.77    3.57
 -21   5  17   44.18    4.69
  21  -5 -17   56.37    5.04
 -21   6   1   42.58    4.00
 -21   6   1   38.66    4.32
 -21   6   1   39.47    3.99
 -21   6   1   40.32    3.91
  21  -6  -1   41.29    4.15
  21  -6  -1   56.05    4.73
 -21   6   2   12.99    2.15
 -21   6   2   11.85    2.03
 -21   6   2   10.35    1.88
  21  -6  -2   18.87    2.37
  21  -6  -2   16.73    2.23
 -21   6   3    9.16    1.76
 -21   6   3    8.07    1.57
 -21   6   3    6.02    1.44
  21  -6  -3    9.16    1.72
  21  -6  -3    9.73    1.70
 -21   6   4   62.29    5.04
 -21   6   4   51.06    4.71
  21  -6  -4   71.44    5.50
  21  -6  -4   68.42    5.41
 -21   6   5    1.47    0.96
 -21   6   5    1.85    0.70
  21  -6  -5    0.56    0.79
 -21   6   6  147.60    9.29
  21  -6  -6  151.38   10.17
 -21   6   7    1.54    1.06
 -21   6   8   86.01    6.33
 -21   6   9   30.63    3.38
 -21   6  10  103.17    7.41
 -21   6  10  109.98    8.01
  21  -6 -10  116.43    7.91
 -21   6  11  117.00    8.08
 -21   6  11  120.47    8.54
  21  -6 -11  121.88    8.20
 -21   6  12   26.72    3.29
 -21   6  12   23.92    3.37
  21  -6 -12   32.93    3.55
 -21   6  13  219.53   13.23
 -21   6  13  221.03   13.48
  21  -6 -13  272.23   15.06
 -21   6  14   -1.34    0.90
  21  -6 -14   -0.31    1.11
 -21   6  15  260.90   15.49
  21  -6 -15  330.65   17.78
 -21   6  16   10.88    2.37
  21  -6 -16   19.54    2.75
 -21   6  17   43.38    4.61
  21  -6 -17   52.65    4.82
 -21   7   1  132.16    8.36
 -21   7   1  131.18    9.01
 -21   7   1  116.37    8.65
 -21   7   1   99.88    7.79
  21  -7  -1  130.34    8.57
  21  -7  -1  139.26    9.67
  21  -7  -1  135.03    9.48
 -21   7   2   94.39    6.57
 -21   7   2   91.56    7.04
 -21   7   2   69.60    5.97
  21  -7  -2   92.04    6.73
  21  -7  -2   99.91    7.40
  21  -7  -2   94.22    7.18
 -21   7   3   90.57    6.59
 -21   7   3  103.71    7.61
 -21   7   3   89.79    7.03
 -21   7   3   83.03    6.63
  21  -7  -3   95.57    7.01
  21  -7  -3  118.04    8.26
  21  -7  -3  109.18    7.92
 -21   7   4  134.58    8.57
 -21   7   4  138.03    9.36
 -21   7   4  113.00    8.49
  21  -7  -4  135.99    8.88
 -21   7   5   29.54    3.40
 -21   7   5   37.34    4.06
 -21   7   5   27.18    3.23
 -21   7   5   34.01    3.51
  21  -7  -5   38.90    4.06
  21  -7  -5   42.14    3.79
  21  -7  -5   38.90    3.74
 -21   7   6   89.19    6.46
 -21   7   6  101.12    7.43
 -21   7   6   73.66    6.13
 -21   7   6   77.44    6.31
  21  -7  -6  103.76    7.22
  21  -7  -6  102.40    7.29
  21  -7  -6   94.02    7.02
 -21   7   7   30.27    3.18
 -21   7   7   33.45    3.65
 -21   7   7   18.39    2.61
 -21   7   7   20.61    2.70
  21  -7  -7   31.32    3.38
  21  -7  -7   30.47    3.00
  21  -7  -7   28.48    2.99
 -21   7   8   64.31    5.33
 -21   7   8   74.72    6.11
  21  -7  -8   69.52    5.60
  21  -7  -8   61.30    5.17
  21  -7  -8   69.78    5.55
 -21   7   9   24.03    2.92
 -21   7   9   22.18    3.08
  21  -7  -9   22.35    2.93
  21  -7  -9   20.13    2.51
  21  -7  -9   23.01    2.66
 -21   7  10    1.65    1.11
 -21   7  10    3.49    1.38
  21  -7 -10    2.48    1.37
 -21   7  11    4.79    1.53
 -21   7  11    4.77    1.73
  21  -7 -11    5.06    1.59
 -21   7  12   19.30    3.00
  21  -7 -12   26.79    3.20
 -21   7  13    4.71    1.65
  21  -7 -13    3.60    1.64
 -21   7  14   -0.99    0.94
  21  -7 -14    0.34    1.00
 -21   7  15   13.16    2.48
  21  -7 -15   15.23    2.60
 -21   7  16    1.08    1.23
  21  -7 -16    1.28    1.38
 -21   8   1   15.86    2.38
 -21   8   1   13.52    2.65
 -21   8   1   15.55    2.42
 -21   8   1   17.56    2.40
  21  -8  -1   14.89    2.54
  21  -8  -1   25.36    2.92
  21  -8  -1   17.83    2.56
 -21   8   2    1.15    0.98
 -21   8   2    1.83    1.23
 -21   8   2    1.88    1.05
 -21   8   2    1.93    0.93
  21  -8  -2    2.09    1.21
  21  -8  -2    1.12    1.28
  21  -8  -2    2.04    1.08
 -21   8   3    1.83    1.12
 -21   8   3    3.39    1.40
 -21   8   3    2.08    1.15
 -21   8   3    2.28    0.97
  21  -8  -3    2.95    1.45
  21  -8  -3    3.05    1.43
  21  -8  -3    2.41    1.19
 -21   8   4   54.85    4.75
 -21   8   4   60.26    5.38
 -21   8   4   53.52    4.95
 -21   8   4   47.96    4.56
  21  -8  -4   58.06    5.02
  21  -8  -4   73.21    5.73
  21  -8  -4   63.85    5.36
 -21   8   5    4.81    1.55
 -21   8   5    6.26    2.01
 -21   8   5    5.97    1.54
 -21   8   5    6.73    1.42
  21  -8  -5    5.73    1.73
  21  -8  -5    8.78    1.75
 -21   8   6   92.60    6.66
 -21   8   6   95.29    7.23
 -21   8   6   82.11    6.64
 -21   8   6   75.63    6.42
  21  -8  -6   99.26    7.02
  21  -8  -6  112.75    7.89
  21  -8  -6  101.16    7.48
 -21   8   7    7.56    1.76
 -21   8   7   10.13    2.07
 -21   8   7    6.67    1.51
 -21   8   7    4.86    1.60
  21  -8  -7    8.84    1.92
  21  -8  -7    9.02    1.69
  21  -8  -7   10.49    1.85
 -21   8   8  144.58    9.43
 -21   8   8  153.75   10.20
  21  -8  -8  171.38   10.42
  21  -8  -8  168.84   11.37
 -21   8   9   24.01    3.32
  21  -8  -9   33.51    3.45
  21  -8  -9   22.67    2.99
 -21   8  10  254.95   15.07
  21  -8 -10  285.85   15.75
 -21   8  11  101.04    7.64
  21  -8 -11  118.07    7.93
 -21   8  12   88.41    7.00
  21  -8 -12  110.09    7.51
 -21   8  13  244.17   14.65
  21  -8 -13  334.33   17.72
 -21   8  14   51.77    5.03
  21  -8 -14   67.03    5.44
 -21   8  15  146.10   10.02
  21  -8 -15  206.39   11.96
 -21   9   1  244.21   14.43
 -21   9   1  212.30   14.32
 -21   9   1  209.49   13.99
  21  -9  -1  238.59   13.69
  21  -9  -1  282.80   17.68
  21  -9  -1  274.93   17.33
 -21   9   2   43.63    3.94
 -21   9   2   39.33    4.20
 -21   9   2   34.59    3.83
 -21   9   2   30.10    3.54
  21  -9  -2   43.72    4.14
  21  -9  -2   45.98    4.31
 -21   9   3  159.73    9.83
 -21   9   3  160.50   10.47
 -21   9   3  136.93   10.01
 -21   9   3  140.17    9.97
  21  -9  -3  160.95   10.04
  21  -9  -3  179.79   11.91
  21  -9  -3  167.94   11.43
 -21   9   4   89.75    6.42
 -21   9   4   88.08    6.85
 -21   9   4   71.17    6.19
 -21   9   4   74.30    6.15
  21  -9  -4   92.62    6.72
  21  -9  -4   90.09    6.93
  21  -9  -4   92.12    7.11
 -21   9   5   51.14    4.58
 -21   9   5   55.29    5.08
 -21   9   5   44.80    4.50
 -21   9   5   46.48    4.43
  21  -9  -5   48.52    4.51
  21  -9  -5   57.13    4.90
  21  -9  -5   56.59    5.00
 -21   9   6   81.97    6.24
 -21   9   6   48.53    4.79
 -21   9   6   47.84    4.86
  21  -9  -6   78.66    5.75
  21  -9  -6   61.68    5.29
  21  -9  -6   70.48    5.79
 -21   9   7    1.05    1.09
 -21   9   7    0.69    0.77
 -21   9   7    1.18    1.02
  21  -9  -7    1.17    1.13
  21  -9  -7    0.98    1.03
  21  -9  -7    0.87    0.98
 -21   9   8   59.15    5.37
  21  -9  -8   60.92    5.14
 -21   9   9    0.70    1.21
  21  -9  -9    2.68    1.15
  21  -9  -9    0.62    1.09
  21  -9  -9    1.51    1.13
 -21   9  10   13.22    2.47
  21  -9 -10   12.68    2.24
 -21   9  11    4.48    1.66
  21  -9 -11    8.16    1.91
 -21   9  12    0.02    1.06
  21  -9 -12   -0.04    0.96
 -21   9  13    1.38    1.20
  21  -9 -13    0.81    1.11
 -21  10   1    1.83    1.41
 -21  10   1    2.64    1.24
  21 -10  -1    2.98    1.40
  21 -10  -1    4.29    1.70
 -21  10   2    3.99    1.64
 -21  10   2    4.95    1.50
 -21  10   2    3.49    1.32
  21 -10  -2    4.86    1.56
  21 -10  -2    8.64    1.90
  21 -10  -2    5.81    1.59
 -21  10   3    2.23    1.28
 -21  10   3    1.51    1.12
 -21  10   3    1.63    1.00
  21 -10  -3    1.94    1.26
  21 -10  -3    4.52    1.48
  21 -10  -3    2.45    1.30
 -21  10   4  106.57    7.76
 -21  10   4   86.03    7.19
  21 -10  -4  105.26    7.41
  21 -10  -4  127.28    8.93
  21 -10  -4  107.17    8.12
 -21  10   5   40.18    4.34
 -21  10   5   38.52    4.16
  21 -10  -5   45.17    4.27
  21 -10  -5   52.53    4.74
 -21  10   6   93.96    7.37
 -21  10   6   86.67    7.10
 -21  10   6   80.95    6.88
  21 -10  -6  105.04    7.25
  21 -10  -6  123.20    8.61
  21 -10  -6  115.11    8.39
 -21  10   7   19.74    2.82
 -21  10   7   14.71    2.40
 -21  10   7   13.22    2.46
  21 -10  -7   18.74    2.64
  21 -10  -7   24.13    2.80
  21 -10  -7   22.88    2.84
 -21  10   8  184.84   11.70
  21 -10  -8  189.44   11.45
  21 -10  -8  220.59   14.19
  21 -10  -8  208.10   13.80
 -21  10   9    0.32    1.01
  21 -10  -9    0.38    1.21
  21 -10  -9    0.93    1.18
  21 -10  -9    0.88    1.10
 -21  10  10  247.02   14.70
  21 -10 -10  306.12   16.55
 -21  10  11   19.50    2.93
  21 -10 -11   25.06    3.03
  21 -10 -12  107.08    7.58
 -21  11   1  243.07   14.33
 -21  11   1  203.36   13.98
 -21  11   1  209.78   14.01
  21 -11  -1  253.27   14.23
  21 -11  -1  266.05   16.87
  21 -11  -1  249.40   16.17
 -21  11   2   12.94    2.41
 -21  11   2    8.36    2.01
 -21  11   2    9.58    1.89
  21 -11  -2   14.05    2.24
  21 -11  -2   13.00    2.32
  21 -11  -2   12.37    2.23
 -21  11   3  257.72   14.78
 -21  11   3  201.34   13.91
 -21  11   3  208.62   13.94
  21 -11  -3  227.79   13.26
  21 -11  -3  278.92   17.46
  21 -11  -3  265.12   16.93
 -21  11   4   11.63    2.25
 -21  11   4    9.32    1.85
  21 -11  -4   11.86    2.19
  21 -11  -4   10.58    2.17
 -21  11   5   51.36    4.95
  21 -11  -5   58.05    5.17
 -21  11   6   15.50    2.51
 -21  11   6    8.77    2.06
 -21  11   6    9.87    1.93
  21 -11  -6   14.97    2.29
  21 -11  -6   10.96    2.18
  21 -11  -6   12.93    2.32
 -21  11   7   18.38    2.78
 -21  11   7   13.51    2.32
 -21  11   7   12.48    2.47
  21 -11  -7   20.95    2.70
  21 -11  -7   20.65    2.68
  21 -11  -7   17.28    2.67
 -21  11   8   13.02    2.36
  21 -11  -8   12.49    2.19
  21 -11  -8   10.87    2.13
  21 -11  -8    7.97    2.08
 -21  11   9    5.98    1.76
  21 -11  -9    7.60    1.83
  21 -11  -9    8.09    1.83
  21 -11  -9    5.71    1.90
  21 -11 -10    6.16    1.79
 -21  12   1    1.79    1.37
 -21  12   1    2.07    1.34
 -21  12   1    2.98    1.28
  21 -12  -1    2.75    1.30
  21 -12  -1    5.26    1.69
  21 -12  -1    2.20    1.29
 -21  12   2   11.29    2.18
 -21  12   2    7.93    2.00
 -21  12   2    8.61    1.84
  21 -12  -2   10.52    2.14
  21 -12  -2   10.90    2.20
  21 -12  -2    9.22    2.06
 -21  12   3   56.39    5.29
 -21  12   3   56.64    5.27
 -21  12   3   57.93    5.09
  21 -12  -3   50.93    4.83
  21 -12  -3   82.24    6.36
  21 -12  -3   70.62    5.91
 -21  12   4   15.13    2.49
 -21  12   4    9.20    2.20
 -21  12   4   11.59    2.03
  21 -12  -4   18.31    2.50
 -21  12   5  157.14   10.30
 -21  12   5  145.65   10.61
 -21  12   5  151.07   10.68
  21 -12  -5  163.01   10.11
  21 -12  -5  200.31   13.08
  21 -12  -5  190.15   12.72
 -21  12   6   27.06    3.32
 -21  12   6   18.81    2.94
 -21  12   6   18.64    2.71
  21 -12  -6   24.39    3.03
  21 -12  -6   29.14    3.27
  21 -12  -6   23.15    3.16
 -21  12   7   56.00    5.17
 -21  12   7   48.32    4.98
  21 -12  -7   55.04    4.92
  21 -12  -7   68.66    5.61
  21 -12  -7   69.34    5.83
  21 -12  -8  150.32   10.47
  21 -12  -8  144.18   10.44
 -21  13   1  231.82   13.75
 -21  13   1  195.46   13.60
 -21  13   1  205.64   13.73
  21 -13  -1  240.74   13.66
  21 -13  -1  264.71   16.78
  21 -13  -1  223.26   14.85
 -21  13   2   22.42    3.14
 -21  13   2   17.70    2.87
 -21  13   2   18.84    2.65
  21 -13  -2   22.66    2.95
  21 -13  -2   23.35    3.10
  21 -13  -2   23.83    3.07
 -21  13   3  244.72   14.18
 -21  13   3  195.62   13.63
  21 -13  -3  227.40   13.16
  21 -13  -3  240.08   15.74
 -21  13   4    1.16    1.16
 -21  13   4    0.42    1.04
 -21  13   4    0.14    0.77
  21 -13  -4    1.35    1.13
  21 -13  -4    0.27    1.10
  21 -13  -5   91.41    7.38
 -21  13   6   12.53    2.48
 -21  13   6   16.36    2.39
  21 -13  -6   17.56    2.62
  21 -13  -6   19.26    2.76
  21 -13  -7   12.52    2.39
  21 -13  -7   13.53    2.49
  21 -13  -8   17.08    2.69
  21 -13  -8   14.19    2.57
 -21  14   1    1.02    1.20
 -21  14   1    1.67    1.07
  21 -14  -1    3.21    1.41
  21 -14  -1    1.63    1.21
 -21  14   2   11.58    2.11
  21 -14  -2   17.78    2.56
  21 -14  -2   14.83    2.60
 -21  14   3   41.94    4.23
  21 -14  -3   63.65    5.36
  21 -14  -4   18.33    2.86
 -21  14   5  111.87    8.77
 -21  14   5  112.46    8.54
  21 -14  -5  163.96   11.06
  21 -14  -5  149.56   10.50
 -21  14   6    1.43    1.33
 -21  14   6    2.48    1.14
  21 -14  -6    4.66    1.54
  21 -14  -6    2.86    1.48
  21 -14  -7  124.62    9.07
  21 -14  -7  110.41    8.59
  21 -14  -8   56.04    5.20
 -21  15   1   94.24    7.76
 -21  15   1  102.55    7.79
  21 -15  -1  128.11    9.23
  21 -15  -1  123.04    9.02
 -21  15   2   55.82    5.41
 -21  15   2   57.42    5.14
  21 -15  -2   74.22    6.10
  21 -15  -2   70.39    6.03
 -21  15   3  112.35    8.73
 -21  15   3  113.24    8.44
  21 -15  -3  150.41   10.36
  21 -15  -3  130.61    9.57
 -21  15   4   28.73    3.67
 -21  15   4   33.23    3.54
  21 -15  -4   37.11    4.01
  21 -15  -4   39.11    4.08
  21 -15  -5  107.94    8.25
  21 -15  -5  102.20    8.06
  21 -15  -6    4.37    1.74
  21 -15  -6    1.56    1.35
  21 -15  -7   59.99    5.41
  21 -15  -7   54.54    5.30
 -21  16   1    1.44    1.25
 -21  16   1    0.97    1.15
  21 -16  -1    1.59    1.39
  21 -16  -1    4.24    1.39
 -21  16   2    5.92    1.73
  21 -16  -2    9.05    2.15
  21 -16  -2    8.20    1.91
 -21  16   3    8.28    2.03
  21 -16  -3    9.17    2.05
 -21  16   4   28.64    3.66
  21 -16  -4   41.09    4.17
 -21  16   5   24.15    3.28
  21 -16  -5   26.49    3.29
  21 -16  -6   10.40    2.19
 -21  17   1   16.92    2.59
  21 -17  -1   22.39    2.98
  21 -17  -1   23.83    3.05
 -21  17   2   66.29    5.66
  21 -17  -2   71.76    6.08
  21 -17  -2   70.45    6.13
 -21  17   3   68.23    5.79
  21 -17  -3   77.36    6.32
 -21  17   4   50.06    4.62
  21 -17  -4   48.02    4.69
  21 -17  -5   68.49    5.92
  21 -17  -6    0.30    1.50
  21 -17  -6    0.98    1.21
 -21  18   1    3.12    1.27
  21 -18  -1    3.55    1.64
  21 -18  -1    3.93    1.45
 -21  18   2    6.82    1.68
  21 -18  -2   10.10    2.02
  21 -18  -2    7.23    1.91
 -21  18   3    6.80    1.57
  21 -18  -3    7.81    1.89
  21 -18  -3    4.67    1.73
  20  13  -5   52.68    5.44
 -20 -13   6   14.46    2.74
  20  13  -6    9.40    2.45
 -20 -13   7   60.17    5.64
  20  13  -7   53.83    5.55
 -20 -13   8   25.01    3.58
  20  13  -8   21.26    3.53
 -20 -13   9   45.78    5.09
 -20 -13   9   41.19    4.20
  20  13  -9   43.77    4.92
 -20 -12   4    2.89    1.48
  20  12  -4   -0.51    1.27
 -20 -12   5    6.82    2.09
  20  12  -5    5.84    2.02
 -20 -12   6    2.67    1.51
  20  12  -6    3.51    1.65
 -20 -12   7    1.24    1.22
  20  12  -7   -0.02    1.45
 -20 -12   8   -0.80    1.01
 -20 -12   8    0.19    1.02
  20  12  -8    0.79    1.26
 -20 -12   9    0.04    1.11
 -20 -12  10    8.36    2.32
 -20 -12  10    8.71    2.01
  20  12 -10    8.00    2.30
 -20 -12  11   12.24    2.67
 -20 -12  11    9.72    2.20
  20  12 -11   11.79    2.83
 -20 -11   3   56.93    5.46
  20  11  -3   57.96    5.57
 -20 -11   4    0.68    1.18
  20  11  -4    3.63    1.60
 -20 -11   5  120.19    8.69
  20  11  -5  116.45    8.68
 -20 -11   6    1.87    1.25
 -20 -11   6    0.23    1.27
  20  11  -6    0.13    1.32
 -20 -11   7  137.24    9.58
 -20 -11   7  126.98    8.68
  20  11  -7  147.03   10.07
 -20 -11   8   24.15    3.07
  20  11  -8   17.53    3.54
 -20 -11   9   64.92    5.87
 -20 -11   9   62.20    5.38
  20  11  -9   64.22    6.03
 -20 -11  10   82.92    6.79
 -20 -11  10   73.36    5.91
 -20 -11  11   29.41    3.78
 -20 -11  11   27.43    3.37
  20  11 -11   29.86    4.02
 -20 -11  12   56.60    5.36
 -20 -11  12   47.73    4.64
  20  11 -12   52.12    5.41
 -20 -11  13    8.22    2.42
 -20 -10   1   27.31    3.58
  20  10  -1   22.58    3.44
 -20 -10   2    7.08    1.95
  20  10  -2    6.31    2.05
 -20 -10   3    6.83    2.00
  20  10  -3    6.69    2.12
 -20 -10   4    4.13    1.62
  20  10  -4    3.51    1.78
 -20 -10   5   -0.33    1.02
 -20 -10   5    1.13    1.08
  20  10  -5    0.63    1.31
 -20 -10   6   -0.34    0.86
 -20 -10   6   -0.34    0.92
  20  10  -6   -0.75    1.30
 -20 -10   7    1.70    1.46
 -20 -10   7    2.24    1.31
  20  10  -7    3.49    1.83
 -20 -10   8    0.64    1.30
 -20 -10   8    2.48    1.29
  20  10  -8    2.18    1.52
 -20 -10   9    7.58    1.99
 -20 -10   9    8.33    1.91
  20  10  -9    6.79    2.20
 -20 -10  10   35.93    4.14
 -20 -10  10   35.10    3.76
  20  10 -10   35.12    4.27
 -20 -10  11   30.52    3.75
 -20 -10  11   26.27    3.32
  20  10 -11   28.81    3.86
 -20 -10  12   50.18    4.97
  20  10 -12   42.79    4.83
 -20 -10  13   20.15    3.13
 -20 -10  13   16.02    2.71
  20  10 -13   18.32    3.21
 -20 -10  14   59.20    5.69
 -20 -10  14   53.21    5.02
 -20  -9   1   10.59    2.30
  20   9  -1   11.97    2.51
 -20  -9   2   68.88    5.92
  20   9  -2   62.81    5.81
 -20  -9   3   54.42    5.15
  20   9  -3   51.93    5.15
 -20  -9   4   24.52    3.37
 -20  -9   4   27.45    3.15
  20   9  -4   21.71    3.45
 -20  -9   5  187.53   11.97
 -20  -9   5  181.93   11.07
  20   9  -6   12.11    2.60
 -20  -9   7  147.75    9.94
 -20  -9   7  137.65    9.11
  20   9  -7  160.74   10.57
 -20  -9   8    0.30    1.05
 -20  -9   8    1.54    1.14
  20   9  -8    0.66    1.43
 -20  -9   9  140.33    9.45
 -20  -9   9  121.63    8.32
  20   9  -9  135.01    9.43
  20   9 -10   46.70    4.91
 -20  -9  11   93.35    7.13
  20   9 -11   78.20    6.78
 -20  -9  12   40.58    4.32
 -20  -9  12   36.06    3.85
  20   9 -12   35.64    4.24
 -20  -9  13   62.30    5.63
 -20  -9  13   58.36    5.10
  20   9 -13   56.32    5.55
  20   9 -13   61.36    5.34
 -20  -9  14   10.08    2.19
  20   9 -14   12.66    2.63
 -20  -8   1    0.55    0.98
  20   8  -1    0.36    1.13
 -20  -8   2   28.94    3.57
  20   8  -2   26.64    3.59
 -20  -8   3   15.66    2.66
 -20  -8   3   13.19    2.25
  20   8  -3   15.26    2.75
 -20  -8   4    5.06    1.56
 -20  -8   5    7.79    1.97
 -20  -8   5    6.54    1.68
  20   8  -5    7.40    2.10
 -20  -8   6    0.62    1.11
 -20  -8   6    2.86    1.27
  20   8  -6    1.83    1.56
  20   8  -7    1.26    1.35
 -20  -8   8    1.46    1.14
 -20  -8   8    1.75    1.19
  20   8  -8    1.94    1.48
 -20  -8   9   10.37    2.25
 -20  -8   9   12.52    2.22
  20   8  -9   12.28    2.60
 -20  -8  10   15.33    2.64
  20   8 -10   18.31    3.00
 -20  -8  11   69.54    5.96
 -20  -8  11   71.46    5.72
  20   8 -11   77.12    6.49
 -20  -8  12    5.59    1.80
 -20  -8  12    4.30    1.48
  20   8 -12    5.80    1.96
 -20  -8  13   69.36    6.01
 -20  -8  13   67.28    5.60
  20   8 -13   83.93    6.40
 -20  -8  14   21.92    3.01
  20   8 -14   24.59    3.43
 -20  -8  15   60.06    5.49
 -20  -8  15   56.72    5.05
 -20  -7   1   18.61    2.87
 -20  -7   1   16.84    2.64
  20   7  -1   17.48    2.96
 -20  -7   2   86.71    6.80
 -20  -7   2   87.23    6.46
  20   7  -2   99.13    7.45
 -20  -7   3    8.01    1.79
 -20  -7   4  136.38    9.13
 -20  -7   4  118.88    8.10
  20   7  -4  128.84    9.03
 -20  -7   5  129.46    8.89
 -20  -7   5  116.48    7.98
  20   7  -5  145.21    9.62
 -20  -7   6  121.38    8.59
 -20  -7   6  126.29    8.36
  20   7  -6  133.81    9.23
 -20  -7   7  199.67   12.29
 -20  -7   7  193.41   11.63
  20   7  -7  224.51   13.42
  20   7  -8   14.21    2.73
 -20  -7   9  231.99   13.78
  20   7  -9  224.55   13.68
 -20  -7  10   -0.35    1.03
 -20  -7  10    1.65    1.00
  20   7 -10    0.07    1.19
 -20  -7  11  205.12   12.60
 -20  -7  11  200.56   11.93
  20   7 -11  220.01   13.34
 -20  -7  12    2.17    1.22
 -20  -7  12    1.35    1.04
  20   7 -12    1.45    1.50
  20   7 -12    0.14    1.41
 -20  -7  13   77.40    6.32
 -20  -7  13   71.91    5.74
  20   7 -13   69.45    5.85
 -20  -7  14   13.06    2.42
  20   7 -14   15.52    2.94
  20   7 -14   15.19    2.86
 -20  -7  15   53.41    5.01
 -20  -7  15   47.95    4.59
 -20  -6   1    5.64    1.71
 -20  -6   1    6.65    1.59
  20   6  -1    5.02    1.87
 -20  -6   2   51.82    4.62
 -20  -6   3    4.96    1.55
 -20  -6   3    4.55    1.50
  20   6  -3    3.67    1.81
 -20  -6   4   37.23    3.95
 -20  -6   4   30.11    3.51
  20   6  -4   36.87    4.09
 -20  -6   5   27.19    3.36
 -20  -6   5   26.18    3.18
  20   6  -5   26.77    3.50
 -20  -6   6    3.33    1.35
 -20  -6   6    2.64    1.31
  20   6  -6    2.27    1.61
 -20  -6   7    0.82    0.96
 -20  -6   7    0.18    0.98
  20   6  -7    0.82    1.27
 -20  -6   8    1.65    1.16
  20   6  -8    1.21    1.38
  20   6  -9   18.02    2.95
 -20  -6  10    4.36    1.60
 -20  -6  10    5.74    1.51
  20   6 -10    4.07    1.84
 -20  -6  11   51.90    4.97
 -20  -6  11   51.01    4.64
  20   6 -11   60.09    5.37
  20   6 -11   61.33    5.18
 -20  -6  12   20.80    3.07
 -20  -6  12   23.59    3.01
  20   6 -12   28.99    3.71
  20   6 -12   25.64    3.26
 -20  -6  13   80.95    6.27
  20   6 -13   95.71    7.02
 -20  -6  14    1.36    1.24
  20   6 -14    1.10    1.53
  20   6 -14    1.25    1.67
 -20  -6  15   72.63    6.11
 -20  -6  15   70.44    5.84
  20   6 -15   85.81    6.77
  20   6 -15   80.05    6.61
 -20  -6  16   71.44    6.04
 -20  -6  16   79.95    6.29
 -20  -5   1   43.19    4.13
 -20  -5   2   51.48    4.81
 -20  -5   2   51.07    4.55
  20   5  -2   51.64    4.97
 -20  -5   3    0.96    0.92
 -20  -5   3    0.58    0.99
  20   5  -3    0.15    1.19
 -20  -5   4  193.00   11.84
 -20  -5   4  189.46   11.32
  20   5  -4  189.69   11.91
 -20  -5   5   65.33    5.54
 -20  -5   5   59.15    5.11
  20   5  -5   75.71    6.09
 -20  -5   6  218.12   13.06
 -20  -5   6  212.33   12.46
  20   5  -6  236.98   13.90
 -20  -5   7   61.50    5.28
  20   5  -7   58.58    5.40
 -20  -5   8  109.82    7.91
 -20  -5   8  112.43    7.68
  20   5  -8  124.25    8.58
 -20  -5   9   92.05    6.95
 -20  -5   9   86.46    6.45
  20   5  -9   98.97    7.35
 -20  -5  10   43.87    4.39
 -20  -5  10   43.00    4.14
  20   5 -10   51.03    4.76
 -20  -5  11  175.75   11.14
 -20  -5  11  171.43   10.58
  20   5 -11  192.86   11.86
  20   5 -11  199.65   11.84
 -20  -5  12   43.07    4.42
 -20  -5  12   46.94    4.34
  20   5 -12   48.51    4.66
 -20  -5  13  128.69    8.57
  20   5 -13  143.78    9.41
 -20  -5  14    7.22    1.85
  20   5 -14    7.51    2.20
  20   5 -14    8.35    2.32
 -20  -5  15  104.03    7.64
 -20  -5  15   99.77    7.30
  20   5 -15  113.06    8.05
  20   5 -15  103.91    7.89
 -20  -5  16   58.53    5.25
 -20  -5  16   46.71    4.78
  20   5 -16   65.31    5.64
  20   5 -16   61.45    5.69
 -20  -5  17    8.70    1.99
 -20  -5  17    6.22    1.93
 -20  -4   1   16.54    2.62
 -20  -4   1   17.55    2.51
  20   4  -1   17.66    2.84
 -20  -4   2   59.09    5.20
 -20  -4   2   54.82    4.78
  20   4  -2   58.05    5.33
 -20  -4   3    0.63    0.77
 -20  -4   3   -0.22    0.90
  20   4  -3   -1.03    1.07
 -20  -4   4   59.20    5.22
 -20  -4   4   59.68    5.02
  20   4  -4   66.44    5.66
 -20  -4   5    0.81    0.89
 -20  -4   5    1.26    0.95
  20   4  -5    2.00    1.40
 -20  -4   6    2.73    1.26
  20   4  -6    2.05    1.48
 -20  -4   7    2.96    1.24
  20   4  -7    2.42    1.43
 -20  -4   8    1.63    1.07
 -20  -4   8    2.11    1.06
  20   4  -8    0.57    1.38
 -20  -4   9    1.67    1.19
 -20  -4   9    2.14    1.17
  20   4  -9    1.82    1.35
 -20  -4  10   12.68    2.32
 -20  -4  10   12.20    2.23
  20   4 -10   13.89    2.51
  20   4 -10   15.97    2.67
 -20  -4  11   12.12    2.36
 -20  -4  11   13.12    2.26
  20   4 -11   15.69    2.65
  20   4 -11   18.01    2.79
 -20  -4  12   31.72    3.73
 -20  -4  12   32.57    3.58
  20   4 -12   41.50    4.18
 -20  -4  13   58.79    5.06
  20   4 -13   66.04    5.64
 -20  -4  14    0.35    0.96
  20   4 -14    1.95    1.48
  20   4 -14    1.11    1.66
 -20  -4  15   73.69    6.23
 -20  -4  15   73.88    5.99
  20   4 -15   76.48    6.29
  20   4 -15   89.79    6.98
 -20  -4  16   28.45    3.46
 -20  -4  16   26.84    3.40
 -20  -4  17  173.90   11.23
 -20  -4  17  177.49   11.36
  20   4 -17  193.15   11.91
  20   4 -17  210.07   12.86
 -20  -4  18   68.99    5.78
 -20  -4  18   62.18    5.69
 -20  -3   1   54.82    4.86
 -20  -3   1   47.99    4.42
  20   3  -1   53.85    5.03
 -20  -3   2   91.80    6.89
 -20  -3   2   85.10    6.36
  20   3  -2   99.29    7.28
 -20  -3   3    1.57    1.04
 -20  -3   3    2.44    1.18
  20   3  -3    1.38    1.24
 -20  -3   4  141.34    9.26
 -20  -3   4  130.73    8.58
  20   3  -4  145.48    9.54
 -20  -3   5    3.75    1.35
 -20  -3   5    3.21    1.46
  20   3  -5    5.78    1.71
 -20  -3   6  106.31    7.55
  20   3  -6  100.12    7.46
 -20  -3   7    1.84    1.07
 -20  -3   7    2.53    1.20
  20   3  -7    1.46    1.35
 -20  -3   8  160.92   10.40
 -20  -3   8  159.80    9.96
  20   3  -8  192.40   11.56
  20   3  -9   56.44    5.11
 -20  -3  10  171.25   10.81
 -20  -3  10  167.24   10.24
 -20  -3  11  141.88    9.60
 -20  -3  11  150.79    9.51
  20   3 -11  172.60   10.67
  20   3 -11  164.07   10.32
 -20  -3  12   50.88    4.83
 -20  -3  12   50.96    4.60
  20   3 -12   61.89    5.40
 -20  -3  13  153.17    9.76
  20   3 -13  174.85   10.94
 -20  -3  14   10.33    2.01
  20   3 -14    6.81    2.39
 -20  -3  15  107.58    7.76
  20   3 -15  124.09    8.80
  20   3 -15  120.35    8.64
 -20  -3  16   25.19    3.27
 -20  -3  17   41.62    4.46
  20   3 -17   49.69    4.82
  20   3 -17   46.48    4.99
 -20  -3  18    8.62    2.13
 -20  -2   1   49.84    4.68
 -20  -2   1   47.45    4.39
  20   2  -1   56.37    5.04
 -20  -2   2   23.88    3.08
 -20  -2   2   22.72    2.91
  20   2  -2   24.84    3.24
 -20  -2   3   11.10    2.19
 -20  -2   3   12.17    2.11
  20   2  -3   12.97    2.38
 -20  -2   4   58.81    5.13
 -20  -2   4   55.35    4.78
  20   2  -4   63.24    5.35
 -20  -2   5    4.68    1.45
  20   2  -5    4.62    1.66
 -20  -2   6   39.27    4.05
 -20  -2   6   33.75    3.64
  20   2  -6   51.55    4.52
 -20  -2   7    3.50    1.32
 -20  -2   7    3.51    1.26
  20   2  -7    3.51    1.58
 -20  -2   8    4.46    1.42
 -20  -2   8    2.80    1.28
  20   2  -8    5.18    1.64
 -20  -2   9    5.83    1.60
 -20  -2   9    3.95    1.43
  20   2  -9    3.59    1.48
  20   2  -9    2.09    1.46
 -20  -2  10    8.01    1.91
 -20  -2  10    7.76    1.84
  20   2 -10    8.26    2.07
  20   2 -10   10.16    2.25
 -20  -2  11   30.89    3.65
 -20  -2  11   28.16    3.35
  20   2 -11   34.08    3.75
  20   2 -11   39.81    4.12
 -20  -2  12   20.22    2.94
 -20  -2  12   20.77    2.81
  20   2 -12   23.64    3.24
  20   2 -12   20.47    3.28
 -20  -2  13   73.74    6.19
 -20  -2  13   75.59    5.93
  20   2 -13   90.58    6.93
 -20  -2  14    0.72    1.12
 -20  -2  14    0.45    1.09
  20   2 -14    0.72    1.48
 -20  -2  15  128.30    9.19
 -20  -2  15  125.62    8.60
  20   2 -15  146.30    9.74
 -20  -2  16    0.56    0.91
 -20  -2  16    0.29    1.07
  20   2 -16    0.86    1.78
 -20  -2  17  157.55   10.85
 -20  -2  17  177.31   11.20
  20   2 -17  201.33   12.48
 -20  -2  18    5.51    1.74
 -20  -2  18    7.80    1.99
  20   2 -18    6.75    2.31
 -20  -2  19  152.08   10.60
 -20  -2  19  174.19   11.38
 -20  -1   1   18.93    2.76
 -20  -1   1   23.24    2.82
  20   1  -1   18.92    2.94
 -20  -1   2   36.43    3.87
 -20  -1   2   31.73    3.50
  20   1  -2   41.81    4.12
 -20  -1   3    4.51    1.49
 -20  -1   3    4.49    1.39
  20   1  -3    5.77    1.62
 -20  -1   4  102.05    7.32
  20   1  -4   97.56    7.19
 -20  -1   5   12.96    2.24
  20   1  -5   11.96    2.30
 -20  -1   6  233.91   13.90
 -20  -1   6  226.03   13.08
  20   1  -6  266.09   14.91
 -20  -1   7    1.20    1.14
 -20  -1   7    1.49    0.99
  20   1  -7    0.74    1.39
 -20  -1   8  307.43   17.53
 -20  -1   8  308.74   16.78
  20   1  -8  328.32   17.86
 -20  -1   9   48.73    4.58
 -20  -1   9   41.40    4.07
  20   1  -9   50.03    4.61
 -20  -1  10  278.71   16.54
 -20  -1  10  286.43   15.81
  20   1 -10  301.07   16.70
  20   1 -10  322.07   17.50
 -20  -1  11   94.78    6.84
  20   1 -11  104.22    7.45
  20   1 -11  102.88    7.53
 -20  -1  12   39.28    4.03
  20   1 -12   47.58    4.45
  20   1 -12   51.34    4.95
 -20  -1  13  114.74    7.95
 -20  -1  13  109.38    8.38
  20   1 -13  137.55    8.91
  20   1 -13  130.90    9.03
 -20  -1  14    0.89    1.17
 -20  -1  14    2.56    1.35
  20   1 -14    1.42    1.37
  20   1 -14    2.61    1.85
 -20  -1  15  134.46    8.94
 -20  -1  15  130.80    9.29
 -20  -1  16    4.04    1.64
 -20  -1  16    4.80    1.67
  20   1 -16    5.29    1.76
  20   1 -16    3.50    1.93
 -20  -1  17   82.38    6.64
 -20  -1  17   77.55    6.65
  20   1 -17   93.12    6.90
  20   1 -17   96.18    7.56
 -20  -1  18   -0.22    1.12
 -20  -1  18   -0.32    1.05
  20   1 -18   -0.32    1.32
  20   1 -18    2.03    1.60
 -20  -1  19   28.15    3.77
 -20  -1  19   30.91    3.81
 -20   0   1   87.42    6.78
 -20   0   1   97.76    6.83
  20   0  -1   98.78    7.18
 -20   0   2   48.55    4.59
 -20   0   2   45.22    4.22
  20   0  -2   53.27    4.77
 -20   0   3   80.63    6.21
 -20   0   3   73.73    5.68
  20   0  -3   70.99    5.85
 -20   0   4   94.82    7.13
  20   0  -4   99.92    7.22
 -20   0   5   46.20    4.46
 -20   0   5   42.96    4.18
  20   0  -5   46.42    4.46
 -20   0   6   14.25    2.43
 -20   0   6   15.09    2.35
  20   0  -6   15.74    2.54
 -20   0   7    3.13    1.21
 -20   0   7    1.72    1.11
  20   0  -7    2.29    1.29
 -20   0   8    5.76    1.58
  20   0  -8    4.56    1.58
 -20   0   9    3.75    1.36
 -20   0   9    3.91    1.62
  20   0  -9    5.56    1.67
 -20   0  10    5.68    1.54
 -20   0  10    4.95    1.69
  20   0 -10    6.93    1.86
 -20   0  11    8.61    1.96
 -20   0  11    9.76    2.20
  20   0 -11   11.49    2.15
  20   0 -11   10.03    2.38
 -20   0  12   10.64    2.14
 -20   0  12   11.04    2.28
  20   0 -12   15.75    2.40
  20   0 -12   11.18    2.65
 -20   0  13   61.96    5.38
  20   0 -13   59.13    5.15
  20   0 -13   55.13    5.46
 -20   0  14   30.89    3.53
 -20   0  14   29.44    3.72
  20   0 -14   33.98    3.72
 -20   0  15  157.05   10.12
 -20   0  15  150.28   10.31
  20   0 -15  180.19   10.91
 -20   0  16   40.51    4.26
 -20   0  16   39.03    4.28
  20   0 -16   46.34    4.42
 -20   0  17  201.35   12.56
 -20   0  17  205.68   12.85
  20   0 -17  239.34   13.69
 -20   0  18    1.73    1.34
 -20   0  18   -0.37    1.03
  20   0 -18    1.61    1.40
 -20   0  19  228.86   14.27
  20   0 -19  307.47   16.88
 -20   1   1   28.96    3.46
 -20   1   1   29.99    3.30
  20  -1  -1   29.76    3.51
 -20   1   2   16.35    2.70
 -20   1   2   19.04    2.57
  20  -1  -2   19.41    2.83
 -20   1   3  119.01    8.22
 -20   1   3  101.29    7.22
  20  -1  -3  127.05    8.36
 -20   1   4   74.74    6.22
  20  -1  -4   90.70    6.63
 -20   1   5  147.35    9.27
  20  -1  -5  144.29    9.39
 -20   1   6  255.79   14.42
 -20   1   6  268.54   16.07
  20  -1  -6  291.89   16.04
 -20   1   7   76.38    5.81
 -20   1   7   73.74    6.27
  20  -1  -7   82.47    6.25
 -20   1   8  404.55   21.22
 -20   1   8  425.51   23.28
  20  -1  -8  457.17   23.56
 -20   1   9    6.00    1.66
 -20   1   9    8.75    1.96
  20  -1  -9    8.90    1.91
 -20   1  10  356.56   19.17
 -20   1  10  395.68   21.63
  20  -1 -10  413.35   21.58
 -20   1  11   10.09    1.96
 -20   1  11    7.80    2.05
  20  -1 -11   11.71    2.18
 -20   1  12   89.78    6.64
 -20   1  12   95.97    7.33
  20  -1 -12   99.05    7.14
 -20   1  13   67.14    5.50
 -20   1  13   64.46    5.74
  20  -1 -13   67.88    5.57
 -20   1  14   49.08    4.68
 -20   1  14   53.52    5.13
  20  -1 -14   57.20    5.01
 -20   1  15  106.41    7.76
 -20   1  15  104.33    7.94
  20  -1 -15  134.77    8.70
 -20   1  16   51.68    5.13
  20  -1 -16   66.51    5.51
 -20   1  17   36.61    4.17
  20  -1 -17   42.40    4.31
 -20   1  18    9.21    2.37
 -20   1  18   11.77    2.34
  20  -1 -18   13.85    2.52
 -20   1  19    0.40    1.11
 -20   1  19    0.33    1.11
  20  -1 -19    1.61    1.50
 -20   1  20    0.96    1.14
 -20   1  20    1.28    1.28
 -20   2   1  199.95   12.03
 -20   2   1  205.48   11.65
 -20   2   1  157.20   10.92
 -20   2   1  138.38    9.89
  20  -2  -1  189.57   11.40
  20  -2  -1  198.72   12.64
  20  -2  -1  193.63   12.37
  20  -2  -2   10.51    2.22
 -20   2   3  162.89   10.25
  20  -2  -3  191.26   11.38
 -20   2   4   88.06    7.03
  20  -2  -4   94.65    6.86
 -20   2   5   58.43    5.42
  20  -2  -5   61.62    5.19
 -20   2   6   28.85    3.29
 -20   2   6   31.97    3.74
  20  -2  -6   33.16    3.62
 -20   2   7    1.20    0.99
 -20   2   7    1.66    1.16
  20  -2  -7    1.15    1.24
 -20   2   8    8.86    1.80
 -20   2   8    9.12    2.07
  20  -2  -8    7.17    1.98
 -20   2   9    0.99    0.88
 -20   2   9    0.12    0.88
  20  -2  -9   -0.66    1.13
 -20   2  10    4.56    1.48
 -20   2  10    3.79    1.52
  20  -2 -10    4.19    1.53
 -20   2  11    6.51    1.70
 -20   2  11    7.26    1.90
  20  -2 -11    7.43    1.82
 -20   2  12   25.47    3.27
 -20   2  12   30.71    3.68
  20  -2 -12   35.36    3.70
 -20   2  13   17.37    2.86
  20  -2 -13   21.22    2.93
 -20   2  14  117.53    8.50
  20  -2 -14  126.83    8.45
 -20   2  15  107.49    8.05
  20  -2 -15  125.56    8.40
 -20   2  16  105.88    7.75
 -20   2  16   96.58    7.51
  20  -2 -16  127.11    8.39
 -20   2  17  194.52   12.27
 -20   2  17  187.98   12.08
  20  -2 -17  251.56   14.13
 -20   2  18   32.84    4.05
 -20   2  18   39.58    4.21
 -20   2  19  210.52   13.23
 -20   2  19  199.71   12.76
  20  -2 -19  269.72   15.10
 -20   2  20   -0.15    1.00
 -20   2  20   -1.70    1.04
 -20   3   1   89.23    6.76
 -20   3   1   76.67    6.19
  20  -3  -1  120.14    8.12
  20  -3  -1  109.25    7.60
 -20   3   2   12.37    2.06
 -20   3   2   13.92    2.41
  20  -3  -2   11.17    2.28
  20  -3  -2   11.76    1.78
  20  -3  -2   10.83    1.72
 -20   3   3  164.81   10.20
 -20   3   3  176.97   11.42
  20  -3  -3  191.67   11.36
 -20   3   4    2.47    1.24
  20  -3  -4    0.50    1.20
 -20   3   5  244.89   14.63
  20  -3  -5  252.93   14.35
 -20   3   6  162.54   10.72
  20  -3  -6  181.68   10.98
 -20   3   7  222.43   12.88
 -20   3   7  222.95   13.54
  20  -3  -7  239.22   13.69
 -20   3   8  272.91   15.18
 -20   3   8  285.24   16.36
  20  -3  -8  287.84   15.98
 -20   3   9   62.36    5.20
 -20   3   9   65.55    5.71
  20  -3  -9   67.24    5.48
 -20   3  10  289.79   16.77
  20  -3 -10  323.63   17.54
 -20   3  11   15.89    2.67
  20  -3 -11   15.10    2.46
 -20   3  12  213.81   13.20
  20  -3 -12  239.95   13.73
 -20   3  13   19.59    2.92
 -20   3  13   22.34    3.13
  20  -3 -13   21.81    2.95
 -20   3  14  166.97   10.66
 -20   3  14  168.51   10.98
  20  -3 -14  195.97   11.62
 -20   3  15   62.13    5.48
 -20   3  15   61.81    5.64
  20  -3 -15   79.26    6.00
 -20   3  16   37.17    4.20
 -20   3  16   48.16    4.67
  20  -3 -16   48.14    4.52
 -20   3  17   10.81    2.40
 -20   3  17   10.50    2.33
  20  -3 -17   13.53    2.45
 -20   3  18   11.85    2.34
 -20   3  18   10.46    2.30
 -20   3  19    4.49    1.67
 -20   3  19    3.23    1.64
  20  -3 -19    3.00    1.71
 -20   3  20   13.87    2.71
 -20   4   1  230.80   13.14
 -20   4   1  235.52   14.25
  20  -4  -1  241.67   13.79
  20  -4  -1  221.13   14.41
  20  -4  -1  238.18   15.19
 -20   4   2    0.72    0.90
 -20   4   2    1.21    1.20
 -20   4   2    0.44    0.67
 -20   4   2    0.74    0.59
  20  -4  -2    1.36    1.13
  20  -4  -2    1.24    0.87
  20  -4  -2    0.57    0.73
 -20   4   3  336.53   17.74
 -20   4   3  358.57   19.54
 -20   4   3  273.55   17.40
 -20   4   3  253.97   16.68
  20  -4  -3  347.46   18.42
  20  -4  -3  331.06   20.13
 -20   4   4    0.31    0.87
 -20   4   4    0.65    1.06
  20  -4  -4    1.32    1.22
 -20   4   5  130.91    9.00
  20  -4  -5  124.30    8.42
 -20   4   6    9.73    2.18
  20  -4  -6   10.76    2.08
 -20   4   7   13.62    2.48
  20  -4  -7   14.46    2.43
 -20   4   8   30.59    3.66
  20  -4  -8   32.65    3.62
 -20   4   9    1.36    1.07
  20  -4  -9    0.55    1.15
 -20   4  10    4.87    1.62
  20  -4 -10    6.03    1.72
 -20   4  11   13.78    2.45
 -20   4  11   18.78    2.80
  20  -4 -11   16.92    2.54
 -20   4  12   66.37    5.52
 -20   4  12   67.26    5.85
  20  -4 -12   72.70    5.75
 -20   4  13    8.40    1.99
 -20   4  13   11.40    2.27
  20  -4 -13    8.66    1.98
 -20   4  14  190.41   11.78
 -20   4  14  196.06   12.18
  20  -4 -14  212.73   12.42
 -20   4  15    6.29    1.87
 -20   4  15    7.38    1.91
  20  -4 -15    7.95    1.86
 -20   4  16  231.32   13.96
 -20   4  16  235.60   14.15
  20  -4 -16  271.77   15.18
 -20   4  17   93.45    7.38
 -20   4  17  100.01    7.59
  20  -4 -17  122.90    8.21
 -20   4  18   82.20    6.80
  20  -4 -18   95.05    7.01
 -20   4  19  148.40   10.15
 -20   4  19  153.90   10.25
 -20   5   1   16.00    2.30
 -20   5   1   16.56    2.65
 -20   5   1   14.11    2.18
 -20   5   1   15.46    2.17
  20  -5  -1   16.32    2.51
 -20   5   2   58.79    5.04
 -20   5   2   50.10    4.61
  20  -5  -2   69.88    5.49
  20  -5  -2   77.74    5.84
 -20   5   3   57.60    4.81
 -20   5   3   53.88    5.14
 -20   5   3   52.64    4.68
 -20   5   3   46.86    4.41
  20  -5  -3   60.43    5.13
  20  -5  -3   77.59    5.70
  20  -5  -3   71.45    5.46
 -20   5   4    8.17    1.55
 -20   5   4    9.07    1.58
  20  -5  -4    8.53    1.96
  20  -5  -4   10.71    1.67
  20  -5  -4    9.45    1.64
 -20   5   5  199.05   11.76
 -20   5   5  198.95   12.45
  20  -5  -5  215.70   12.60
  20  -5  -5  236.64   14.71
  20  -5  -5  207.81   13.37
 -20   5   6   14.87    2.29
 -20   5   6   17.25    2.73
  20  -5  -6   15.79    2.46
 -20   5   7  206.36   12.19
 -20   5   7  229.80   13.67
  20  -5  -7  233.92   13.36
 -20   5   8   57.39    4.86
 -20   5   8   56.04    5.23
  20  -5  -8   61.45    5.11
 -20   5   9  172.77   10.59
 -20   5   9  171.88   11.05
  20  -5  -9  192.44   11.39
 -20   5  10  117.56    8.03
 -20   5  10  118.84    8.48
  20  -5 -10  133.40    8.62
 -20   5  11   77.07    6.07
 -20   5  11   90.54    6.93
  20  -5 -11   91.47    6.64
 -20   5  12  193.44   11.88
 -20   5  12  203.97   12.60
  20  -5 -12  231.89   13.20
 -20   5  13    0.93    0.98
 -20   5  13    0.57    1.20
  20  -5 -13    0.89    1.20
 -20   5  14  236.31   14.04
 -20   5  14  250.74   14.82
  20  -5 -14  292.42   16.15
 -20   5  15   19.82    3.09
 -20   5  15   26.20    3.47
  20  -5 -15   28.72    3.28
 -20   5  16  103.36    7.68
 -20   5  16   99.45    7.56
  20  -5 -16  113.26    7.86
 -20   5  17   38.26    4.20
 -20   5  18    0.93    1.18
 -20   5  18    1.52    1.25
  20  -5 -18    2.89    1.35
 -20   5  19   26.10    3.58
  20  -5 -19   41.00    4.06
 -20   6   1  131.47    8.42
 -20   6   1  137.51    9.25
 -20   6   1  103.29    7.97
  20  -6  -1  135.62    8.79
  20  -6  -1  146.16   10.00
  20  -6  -1  139.75    9.73
 -20   6   2   41.58    3.87
 -20   6   2   42.69    4.37
 -20   6   2   36.58    3.77
 -20   6   2   31.74    3.49
  20  -6  -2   41.95    4.08
  20  -6  -2   44.24    4.09
  20  -6  -2   43.66    4.08
 -20   6   3  163.09    9.94
 -20   6   3  168.35   10.76
 -20   6   3  140.82   10.10
  20  -6  -3  173.88   10.75
  20  -6  -3  161.33   10.92
  20  -6  -3  174.45   11.61
 -20   6   4   71.87    5.50
 -20   6   4   70.28    5.93
 -20   6   4   63.96    5.45
 -20   6   4   57.44    5.11
  20  -6  -4   76.05    5.85
  20  -6  -4   80.00    6.06
  20  -6  -4   85.41    6.35
 -20   6   5   90.51    6.33
 -20   6   5  102.26    7.32
 -20   6   5   65.70    5.73
 -20   6   5   72.40    5.97
  20  -6  -5  101.49    6.92
 -20   6   6    0.59    0.76
 -20   6   6   -0.89    0.93
 -20   6   6    0.52    0.56
 -20   6   6    1.35    0.68
  20  -6  -6    0.19    1.06
  20  -6  -6    0.06    0.67
  20  -6  -6    0.55    0.69
 -20   6   7   24.12    2.86
 -20   6   7   24.44    3.19
  20  -6  -7   25.05    3.00
  20  -6  -7   19.46    2.48
  20  -6  -7   22.27    2.62
 -20   6   8   30.28    3.37
 -20   6   8   33.75    3.83
  20  -6  -8   32.87    3.52
 -20   6   9    3.14    1.25
 -20   6   9    5.29    1.61
 -20   6   9    2.46    0.86
  20  -6  -9    4.96    1.41
 -20   6  10    0.41    0.97
 -20   6  10    0.76    0.99
  20  -6 -10    1.43    1.15
  20  -6 -10    0.63    0.56
 -20   6  11   51.07    4.76
 -20   6  11   52.38    5.04
  20  -6 -11   63.47    5.12
 -20   6  12   20.77    2.85
 -20   6  12   16.20    2.83
  20  -6 -12   21.71    2.82
 -20   6  13   29.67    3.56
 -20   6  13   33.23    3.86
  20  -6 -13   35.31    3.68
 -20   6  14   99.63    7.41
 -20   6  14  103.34    7.70
  20  -6 -14  114.38    7.78
 -20   6  15   -0.55    1.03
  20  -6 -15    0.96    1.14
  20  -6 -16  185.67   11.40
 -20   6  17   23.55    3.27
 -20   6  17   21.01    3.11
  20  -6 -17   28.54    3.32
 -20   6  18  108.56    8.15
  20  -6 -18  153.58    9.61
 -20   6  19   22.62    3.27
  20  -6 -19   30.00    3.51
 -20   7   1    3.77    1.22
 -20   7   1    3.47    1.39
 -20   7   1    2.74    1.10
 -20   7   1    1.76    1.03
  20  -7  -1    1.18    1.33
  20  -7  -1    2.75    1.38
  20  -7  -1    2.78    1.19
 -20   7   2   64.12    5.20
 -20   7   2   70.07    5.92
 -20   7   2   60.51    5.39
 -20   7   2   64.20    5.37
  20  -7  -2   66.48    5.48
  20  -7  -2   81.64    6.26
  20  -7  -2   74.48    5.97
 -20   7   3   62.14    4.97
 -20   7   3   62.22    5.46
 -20   7   3   48.43    4.58
  20  -7  -3   59.43    5.10
  20  -7  -3   80.82    6.03
 -20   7   4   10.15    1.96
 -20   7   4    7.83    2.12
 -20   7   4   11.82    1.95
 -20   7   4   10.23    1.77
  20  -7  -4   11.24    2.16
  20  -7  -4   14.93    2.12
  20  -7  -4   14.98    2.10
 -20   7   5  117.88    8.69
 -20   7   5  108.24    8.29
  20  -7  -5  143.32    9.06
  20  -7  -5  163.27   10.65
  20  -7  -5  143.60    9.86
 -20   7   6    9.49    1.93
 -20   7   6   10.63    2.25
 -20   7   6    9.79    1.86
  20  -7  -6   11.74    2.15
  20  -7  -6   13.39    2.01
 -20   7   7  148.39    9.40
 -20   7   7  153.80   10.10
 -20   7   7  135.65    9.69
 -20   7   7  137.71    9.80
  20  -7  -7  163.19   10.04
  20  -7  -7  181.17   11.69
  20  -7  -7  185.14   12.01
 -20   7   8    1.81    1.07
 -20   7   8    1.33    1.28
 -20   7   8    0.84    0.82
 -20   7   8    1.33    0.89
  20  -7  -8    1.78    1.11
  20  -7  -8    2.16    0.94
  20  -7  -8    2.57    1.03
 -20   7   9  192.03   11.45
 -20   7   9  197.94   12.12
 -20   7   9  160.66   11.16
 -20   7   9  158.24   11.11
  20  -7  -9  207.96   12.06
  20  -7  -9  222.33   13.98
  20  -7  -9  206.14   13.32
 -20   7  10  119.57    7.97
 -20   7  10  127.10    8.60
 -20   7  10   87.33    7.05
 -20   7  10   90.53    7.19
  20  -7 -10  135.33    8.50
  20  -7 -10  128.37    8.81
  20  -7 -10  120.55    8.51
 -20   7  11  157.75    9.91
 -20   7  11  172.27   10.74
 -20   7  11  118.05    8.87
 -20   7  11  114.18    8.72
  20  -7 -11  191.71   11.03
  20  -7 -11  174.56   11.40
  20  -7 -11  177.49   11.56
 -20   7  12  212.46   12.74
 -20   7  12  219.62   13.24
  20  -7 -12  233.32   13.33
  20  -7 -12  224.12   14.46
  20  -7 -12  217.66   14.19
 -20   7  13    7.00    1.90
  20  -7 -13    8.96    1.91
 -20   7  14  283.33   16.06
 -20   7  14  276.04   15.96
 -20   7  15    3.62    1.45
 -20   7  15    3.06    1.34
  20  -7 -15    1.86    1.48
 -20   7  16   70.60    6.05
  20  -7 -16   85.71    6.45
 -20   7  17    1.56    1.35
  20  -7 -17    4.12    1.45
 -20   7  18   11.89    2.49
  20  -7 -18   18.46    2.76
 -20   8   1   43.21    4.03
 -20   8   1   46.07    4.51
 -20   8   1   38.51    4.03
 -20   8   1   37.65    3.89
  20  -8  -1   48.69    4.39
  20  -8  -1   45.24    4.36
  20  -8  -1   45.86    4.37
 -20   8   2  149.73    9.26
 -20   8   2  151.95    9.97
 -20   8   2  130.22    9.53
 -20   8   2  124.38    9.10
  20  -8  -2  149.21    9.46
  20  -8  -2  165.32   11.10
  20  -8  -2  159.30   10.89
 -20   8   3   70.51    5.44
 -20   8   3   72.48    6.04
 -20   8   3   58.63    5.37
 -20   8   3   61.08    5.28
  20  -8  -3   75.28    5.80
  20  -8  -3   77.28    6.10
  20  -8  -3   73.00    5.96
 -20   8   4   61.08    5.06
 -20   8   4   64.97    5.65
 -20   8   4   58.95    5.27
 -20   8   4   55.42    4.95
  20  -8  -4   78.59    6.03
  20  -8  -4   75.34    5.97
 -20   8   5  103.45    7.16
 -20   8   5  113.45    8.01
 -20   8   5   84.63    7.00
 -20   8   5   89.86    7.08
  20  -8  -5  113.98    7.66
  20  -8  -5  114.36    8.16
  20  -8  -5  117.80    8.43
 -20   8   6    2.65    1.16
 -20   8   6    1.24    1.22
  20  -8  -6    2.27    1.23
  20  -8  -6    2.63    1.23
 -20   8   7  105.30    7.31
 -20   8   7  119.58    8.23
 -20   8   7   90.55    7.18
 -20   8   7   92.51    7.33
  20  -8  -7  114.23    7.69
  20  -8  -7  120.70    8.40
 -20   8   8   16.10    2.35
 -20   8   8   17.28    2.65
 -20   8   8   11.77    2.02
 -20   8   8    9.49    2.05
  20  -8  -8   15.02    2.38
  20  -8  -8   17.34    2.24
  20  -8  -8   16.82    2.33
 -20   8   9   13.90    2.16
 -20   8   9   17.34    2.57
 -20   8   9    9.85    1.89
 -20   8   9    7.37    1.88
  20  -8  -9   18.20    2.33
 -20   8  10    1.88    1.13
 -20   8  10    1.97    1.26
 -20   8  10    1.87    1.02
 -20   8  10    1.70    1.10
  20  -8 -10    1.86    1.17
  20  -8 -10    2.93    1.11
  20  -8 -10    2.42    1.14
 -20   8  11   39.32    4.03
 -20   8  11   40.48    4.53
 -20   8  11   31.80    3.64
 -20   8  11   37.02    3.90
  20  -8 -11   48.25    4.30
  20  -8 -11   48.37    4.29
  20  -8 -11   48.13    4.36
 -20   8  12   24.39    3.15
  20  -8 -12   24.64    2.97
 -20   8  13    3.52    1.52
 -20   8  13    5.62    1.72
  20  -8 -13    4.60    1.50
 -20   8  14   51.31    4.95
 -20   8  14   49.78    4.91
  20  -8 -14   67.22    5.29
 -20   8  15    2.18    1.20
  20  -8 -15    1.56    1.24
 -20   8  16   86.18    6.80
  20  -8 -16   95.46    6.93
 -20   8  17    3.75    1.54
  20  -8 -17    3.26    1.55
 -20   8  18  116.67    8.53
  20  -8 -18  156.74    9.70
 -20   9   1    2.46    1.20
 -20   9   1    2.36    1.46
 -20   9   1    2.43    1.15
 -20   9   1    2.49    1.15
  20  -9  -1    1.96    1.32
  20  -9  -1    3.55    1.43
  20  -9  -1    2.74    1.27
 -20   9   2   21.32    2.89
 -20   9   2   28.52    3.49
 -20   9   2   26.97    3.16
 -20   9   2   26.35    3.07
  20  -9  -2   26.42    3.20
  20  -9  -2   28.95    3.29
 -20   9   3   16.57    2.40
 -20   9   3   17.27    2.70
 -20   9   3   13.51    2.35
 -20   9   3   15.48    2.27
  20  -9  -3   15.20    2.44
  20  -9  -3   23.74    2.77
  20  -9  -3   17.75    2.54
 -20   9   4   41.16    3.98
 -20   9   4   36.80    4.17
 -20   9   4   39.78    4.09
 -20   9   4   38.57    3.86
  20  -9  -4   41.32    4.11
  20  -9  -4   55.75    4.72
  20  -9  -4   46.26    4.38
 -20   9   5  100.41    7.04
 -20   9   5  115.40    8.03
 -20   9   5   87.01    7.12
 -20   9   5   85.96    6.90
  20  -9  -5  106.58    7.36
  20  -9  -5  119.25    8.42
  20  -9  -5  109.01    8.08
 -20   9   6   52.40    5.16
 -20   9   6   42.08    4.34
 -20   9   6   43.16    4.27
  20  -9  -6   50.57    4.55
  20  -9  -6   55.55    4.79
  20  -9  -6   56.93    4.98
 -20   9   7  156.46    9.85
 -20   9   7  156.03   10.28
 -20   9   7  133.41    9.93
 -20   9   7  152.62   10.75
  20  -9  -7  171.13   10.37
  20  -9  -7  196.47   12.60
  20  -9  -7  185.93   12.32
 -20   9   8    3.96    1.35
 -20   9   8    4.38    1.53
 -20   9   8    2.89    1.12
 -20   9   8    3.24    1.30
  20  -9  -8    3.54    1.40
  20  -9  -8    4.64    1.36
  20  -9  -8    4.12    1.45
 -20   9   9  232.26   13.52
 -20   9   9  226.40   14.91
 -20   9   9  204.50   13.92
  20  -9  -9  291.24   17.90
  20  -9  -9  286.91   17.86
 -20   9  10   45.73    4.29
 -20   9  10   39.15    3.99
 -20   9  10   34.60    3.94
  20  -9 -10   54.09    4.57
  20  -9 -10   45.93    4.41
 -20   9  11  178.61   11.00
 -20   9  11  185.31   11.48
 -20   9  11  147.05   10.60
 -20   9  11  147.39   10.70
  20  -9 -11  184.77   11.06
  20  -9 -11  205.56   13.25
  20  -9 -11  199.27   13.13
 -20   9  12   85.05    6.73
 -20   9  12   94.32    7.18
  20  -9 -12  108.41    7.36
  20  -9 -12   98.98    7.51
  20  -9 -12   99.22    7.70
 -20   9  13   84.18    6.59
  20  -9 -13   80.58    6.17
 -20   9  14  132.09    9.16
  20  -9 -14  165.08   10.08
 -20   9  15   34.56    3.87
 -20   9  16   33.63    3.93
  20  -9 -16   46.02    4.29
  20  -9 -17    2.54    1.44
 -20  10   1   11.20    2.22
 -20  10   1    8.48    1.93
 -20  10   1   10.25    1.89
  20 -10  -1   10.50    2.07
  20 -10  -1   12.35    2.21
 -20  10   2  219.34   14.78
 -20  10   2  219.48   14.51
  20 -10  -2  251.84   14.23
  20 -10  -2  287.94   17.93
  20 -10  -2  280.63   17.70
 -20  10   3   73.94    5.66
 -20  10   3   76.08    6.15
 -20  10   3   61.14    5.62
 -20  10   3   60.56    5.37
  20 -10  -3   79.77    5.96
  20 -10  -3   80.07    6.34
  20 -10  -3   77.46    6.28
 -20  10   4   79.53    6.00
 -20  10   4   86.67    6.66
 -20  10   4   64.55    5.89
 -20  10   4   70.54    5.94
  20 -10  -4   85.21    6.25
  20 -10  -4   87.17    6.74
  20 -10  -4   85.98    6.79
 -20  10   5   84.09    6.19
 -20  10   5   86.47    6.69
 -20  10   5   68.36    6.07
  20 -10  -5   90.62    7.03
 -20  10   6    5.55    1.50
 -20  10   6    3.86    1.51
  20 -10  -6    6.03    1.64
 -20  10   7   36.42    3.73
 -20  10   7   31.38    3.56
 -20  10   7   31.20    3.63
  20 -10  -7   41.15    4.04
 -20  10   8    4.95    1.41
 -20  10   8    3.73    1.62
 -20  10   8    3.55    1.22
 -20  10   8    3.03    1.41
  20 -10  -8    3.54    1.47
  20 -10  -8    4.90    1.58
 -20  10   9    1.58    1.03
 -20  10   9    1.30    1.29
 -20  10   9    1.71    0.91
 -20  10   9    1.11    1.16
  20 -10  -9    1.60    1.14
  20 -10  -9    1.35    1.25
 -20  10  10   16.10    2.61
 -20  10  10   18.34    2.82
 -20  10  10   15.45    2.61
  20 -10 -10   22.08    2.75
  20 -10 -10   22.44    2.90
 -20  10  11   17.94    2.80
 -20  10  11   15.80    2.68
  20 -10 -11   20.58    2.77
  20 -10 -11   23.21    3.00
 -20  10  12   20.16    2.98
  20 -10 -12   22.14    2.90
  20 -10 -12   25.55    3.05
  20 -10 -12   24.78    3.16
 -20  10  13   12.57    2.32
  20 -10 -13   10.50    2.13
 -20  10  14   31.75    3.78
  20 -10 -14   37.87    3.81
 -20  10  15   10.94    2.23
  20 -10 -15   11.66    2.22
 -20  11   1    1.45    1.15
 -20  11   1    3.11    1.20
  20 -11  -1    2.06    1.46
  20 -11  -1    3.60    1.30
 -20  11   2   50.58    4.62
 -20  11   2   48.98    4.83
 -20  11   2   49.09    4.61
  20 -11  -2   71.58    5.71
  20 -11  -2   57.00    5.17
 -20  11   3    8.65    1.82
 -20  11   3    7.79    1.69
  20 -11  -3   11.99    2.04
  20 -11  -3    8.61    1.93
 -20  11   4  184.37   11.10
 -20  11   4  178.53   11.37
 -20  11   4  163.87   11.38
  20 -11  -4  230.22   14.61
 -20  11   5   98.62    6.95
 -20  11   5  100.85    7.39
 -20  11   5   83.23    6.96
 -20  11   5   83.77    6.74
  20 -11  -5   96.19    6.89
  20 -11  -5  112.68    8.10
 -20  11   6  153.16    9.76
 -20  11   6  173.47   10.85
 -20  11   6  138.07   10.16
 -20  11   6  135.78    9.94
  20 -11  -6  164.67   10.11
  20 -11  -6  189.47   12.39
  20 -11  -6  176.11   11.93
 -20  11   7  169.31   12.05
 -20  11   7  187.56   13.28
  20 -11  -7  217.33   12.47
  20 -11  -7  237.94   15.07
  20 -11  -7  211.08   14.01
 -20  11   8   10.44    2.07
 -20  11   8    9.24    2.16
 -20  11   8   10.28    1.99
 -20  11   8   10.94    2.14
  20 -11  -8    9.72    2.09
  20 -11  -8   14.63    2.23
  20 -11  -8   15.38    2.33
 -20  11   9  388.16   20.83
 -20  11   9  313.90   20.34
 -20  11   9  326.02   20.85
  20 -11  -9  393.59   20.50
  20 -11  -9  441.69   26.35
 -20  11  10   -0.46    1.09
 -20  11  10    1.25    0.91
  20 -11 -10    0.44    1.00
  20 -11 -10    1.30    1.06
 -20  11  11  246.13   14.43
 -20  11  11  201.00   13.96
  20 -11 -11  267.19   14.81
  20 -11 -11  283.59   17.71
  20 -11 -11  295.87   18.66
 -20  11  12   52.45    5.06
  20 -11 -12   64.56    5.24
  20 -11 -12   64.85    5.51
  20 -11 -12   56.84    5.36
 -20  11  13  183.75   11.55
  20 -11 -13  201.97   11.92
 -20  12   1    5.80    1.66
 -20  12   1    3.98    1.49
 -20  12   1    3.59    1.46
  20 -12  -1    3.52    1.46
  20 -12  -1    4.68    1.70
  20 -12  -1    6.50    1.60
 -20  12   2  308.83   17.21
 -20  12   2  263.71   17.35
 -20  12   2  262.66   17.00
  20 -12  -2  315.79   17.05
  20 -12  -2  337.90   20.82
  20 -12  -2  298.53   19.03
 -20  12   3   23.06    2.87
 -20  12   3   23.12    3.10
 -20  12   3   16.91    2.79
 -20  12   3   18.86    2.60
  20 -12  -3   21.82    2.80
  20 -12  -3   23.73    3.04
  20 -12  -3   20.57    2.90
 -20  12   4  100.87    7.03
 -20  12   4  106.50    7.59
 -20  12   4   77.78    6.77
 -20  12   4   85.46    6.79
  20 -12  -4  104.11    7.14
 -20  12   5   37.38    3.91
 -20  12   5   46.31    4.46
 -20  12   5   32.92    3.93
 -20  12   5   37.79    3.83
  20 -12  -5   39.56    3.93
  20 -12  -5   41.92    4.17
  20 -12  -5   43.68    4.32
 -20  12   6   14.54    2.59
 -20  12   7   34.25    3.78
 -20  12   7   23.64    3.34
 -20  12   7   25.31    3.21
  20 -12  -7   36.42    3.64
  20 -12  -7   37.97    3.78
  20 -12  -7   35.18    3.79
 -20  12   8   15.99    2.58
 -20  12   8   12.26    2.19
 -20  12   8   10.54    2.38
  20 -12  -8   16.82    2.46
  20 -12  -8   17.73    2.51
  20 -12  -8   17.88    2.60
 -20  12   9    4.58    1.65
 -20  12   9    5.60    1.44
 -20  12   9    5.26    1.69
  20 -12  -9    3.06    1.46
  20 -12  -9    5.26    1.63
  20 -12  -9    6.82    1.88
 -20  12  10    0.67    0.91
 -20  12  10   -0.55    0.80
 -20  12  10    0.94    1.23
  20 -12 -10   -0.29    1.04
  20 -12 -10    0.32    1.14
  20 -12 -10    3.11    1.44
 -20  12  11   10.86    2.24
 -20  12  11   10.90    2.20
  20 -12 -11   13.29    2.33
  20 -12 -11   15.62    2.34
  20 -12 -11   12.71    2.40
 -20  12  12    2.43    1.18
  20 -12 -12    0.96    1.10
  20 -12 -12    1.19    1.20
  20 -12 -12    1.64    1.31
 -20  13   1   31.29    3.70
 -20  13   1   27.54    3.49
  20 -13  -1   29.48    3.42
  20 -13  -1   37.70    3.90
  20 -13  -1   31.95    3.65
 -20  13   2   52.21    5.01
 -20  13   2   56.16    5.21
  20 -13  -2   57.59    4.93
  20 -13  -2   63.66    5.54
 -20  13   3    2.86    1.49
 -20  13   3    2.64    1.31
 -20  13   3    1.70    1.11
  20 -13  -3    2.52    1.24
  20 -13  -3    4.37    1.56
  20 -13  -3    3.48    1.39
 -20  13   4  208.52   12.72
 -20  13   4  194.04   13.35
 -20  13   4  188.59   12.85
  20 -13  -4  210.05   12.33
  20 -13  -4  269.50   16.83
  20 -13  -4  243.94   15.72
 -20  13   5    7.24    1.90
 -20  13   5    7.89    1.96
 -20  13   5    7.21    1.67
  20 -13  -5    7.66    1.81
  20 -13  -5   10.84    2.00
  20 -13  -5    8.39    1.92
 -20  13   6  229.65   13.54
 -20  13   6  195.70   13.51
 -20  13   6  191.30   13.22
  20 -13  -6  231.16   13.16
  20 -13  -6  263.34   16.63
  20 -13  -6  261.85   16.72
 -20  13   7   79.88    6.35
 -20  13   7   66.76    6.07
 -20  13   7   66.51    5.94
  20 -13  -7   92.15    6.45
  20 -13  -7   96.14    7.22
  20 -13  -7   85.47    6.89
 -20  13   8   86.66    7.23
 -20  13   8   93.62    7.54
  20 -13  -8   98.57    7.00
  20 -13  -8  116.13    8.36
  20 -13  -8  110.73    8.35
 -20  13   9  207.60   12.51
 -20  13   9  192.31   13.34
 -20  13   9  181.08   12.70
  20 -13  -9  217.39   12.53
  20 -13  -9  227.49   14.92
 -20  13  10   39.46    4.23
 -20  13  10   35.09    4.14
  20 -13 -10   46.39    4.28
  20 -13 -10   49.83    4.72
  20 -13 -11  196.42   13.18
  20 -13 -11  196.67   13.34
 -20  14   1   91.14    6.87
 -20  14   1   72.81    6.18
  20 -14  -1   94.68    6.68
  20 -14  -1   88.29    7.01
 -20  14   2  197.73   11.99
 -20  14   2  156.61   11.38
 -20  14   2  166.76   11.52
  20 -14  -2  200.59   11.69
  20 -14  -2  198.22   13.19
  20 -14  -2  193.13   13.08
 -20  14   3    4.22    1.63
 -20  14   3    4.98    1.72
 -20  14   3    4.74    1.41
  20 -14  -3    3.82    1.50
  20 -14  -3    6.58    1.79
  20 -14  -3    6.84    1.72
 -20  14   4  136.73    9.06
 -20  14   4  107.25    8.50
 -20  14   4  114.34    8.51
  20 -14  -4  133.62    8.58
  20 -14  -4  133.05    9.53
  20 -14  -4  134.17    9.71
 -20  14   5    2.12    1.29
 -20  14   5    0.81    1.38
 -20  14   5    2.13    1.16
  20 -14  -5    3.02    1.34
  20 -14  -5    4.52    1.48
  20 -14  -5    4.29    1.47
 -20  14   6   53.13    5.00
  20 -14  -6   60.63    4.99
  20 -14  -6   55.63    5.17
  20 -14  -6   54.44    5.19
 -20  14   7   10.21    2.08
  20 -14  -7    8.83    2.13
  20 -14  -7    8.96    2.16
 -20  14   8   14.28    2.49
 -20  14   8    8.90    2.24
  20 -14  -8   15.40    2.36
  20 -14  -8   12.06    2.27
  20 -14  -8   14.94    2.58
 -20  14   9    1.27    1.05
 -20  14   9    1.17    1.24
  20 -14  -9    1.75    1.35
 -20  14  10    2.50    1.19
  20 -14 -10    3.48    1.43
  20 -14 -10    3.30    1.66
  20 -14 -11    1.48    1.25
  20 -14 -11    0.69    1.30
 -20  15   1   22.82    3.20
 -20  15   1   20.24    3.00
 -20  15   1   21.75    2.83
  20 -15  -1   22.62    2.95
  20 -15  -1   30.68    3.38
  20 -15  -1   25.97    3.24
 -20  15   2   15.62    2.77
 -20  15   2   19.96    2.84
 -20  15   2   19.96    2.58
  20 -15  -2   15.51    2.59
  20 -15  -2   27.93    3.12
  20 -15  -2   21.96    2.98
 -20  15   3   31.81    3.73
 -20  15   3   28.09    3.51
 -20  15   3   28.48    3.28
  20 -15  -3   29.05    3.39
  20 -15  -3   35.43    3.78
  20 -15  -3   35.66    3.84
 -20  15   4  135.03    9.25
 -20  15   4  133.86    9.97
 -20  15   4  137.86    9.85
  20 -15  -4  154.92    9.64
  20 -15  -4  190.12   12.46
  20 -15  -4  164.80   11.42
 -20  15   5   21.93    3.08
 -20  15   5   18.75    2.91
 -20  15   5   20.62    2.72
  20 -15  -5   21.27    2.86
  20 -15  -5   25.27    3.09
  20 -15  -5   24.67    3.17
 -20  15   6   94.85    7.72
 -20  15   6   99.22    7.68
  20 -15  -6  127.63    9.03
  20 -15  -6  115.51    8.57
 -20  15   7    3.95    1.78
 -20  15   7    6.66    1.55
  20 -15  -7    7.84    1.89
  20 -15  -7    7.81    1.94
 -20  15   8  100.37    8.15
  20 -15  -8  140.10    9.73
  20 -15  -8  131.60    9.55
 -20  15   9   54.15    5.11
 -20  15   9   50.43    5.01
  20 -15  -9   71.67    5.83
  20 -15  -9   65.20    5.69
  20 -15 -10   67.69    5.76
  20 -15 -10   63.61    5.75
  20 -15 -11   85.54    6.84
  20 -15 -11   80.75    6.78
 -20  16   1   60.46    5.35
 -20  16   1   48.54    4.93
 -20  16   1   51.51    4.79
  20 -16  -1   63.20    5.19
  20 -16  -1   65.55    5.60
  20 -16  -1   59.99    5.44
 -20  16   2   50.59    4.99
 -20  16   2   49.66    4.65
  20 -16  -2   63.09    5.42
  20 -16  -2   60.14    5.39
 -20  16   3   39.11    4.29
 -20  16   3   41.79    4.13
  20 -16  -3   53.04    4.82
  20 -16  -3   49.42    4.72
  20 -16  -4   26.35    3.29
  20 -16  -4   25.15    3.28
  20 -16  -5    2.37    1.51
  20 -16  -5    4.00    1.50
 -20  16   6   55.17    5.40
 -20  16   6   61.75    5.40
  20 -16  -6   72.61    6.00
  20 -16  -6   69.97    6.00
 -20  16   7   -0.20    1.05
 -20  16   7    0.14    0.79
  20 -16  -7    0.75    1.28
  20 -16  -7   -0.99    1.04
 -20  16   8   10.58    2.32
  20 -16  -8   18.83    2.61
 -20  16   9    3.97    1.62
  20 -16  -9    5.80    1.66
  20 -16  -9    3.46    1.62
  20 -16 -10    3.70    1.59
  20 -16 -10    3.96    1.59
 -20  17   1   13.75    2.28
  20 -17  -1   19.19    2.72
  20 -17  -1   17.50    2.62
 -20  17   2   23.02    2.93
  20 -17  -2   31.62    3.49
  20 -17  -2   25.19    3.24
 -20  17   3   49.47    4.68
  20 -17  -3   65.76    5.55
  20 -17  -3   55.67    5.23
 -20  17   4   35.09    3.79
  20 -17  -4   47.60    4.47
  20 -17  -4   41.00    4.30
 -20  17   5   16.72    2.41
  20 -17  -5   16.75    2.60
  20 -17  -5   16.03    2.66
 -20  17   6   49.60    4.73
  20 -17  -6   55.97    5.17
  20 -17  -6   54.60    5.15
 -20  17   7    1.32    1.02
  20 -17  -7    2.02    1.41
  20 -17  -8  140.97   10.05
 -20  18   1   54.79    4.96
  20 -18  -1   58.05    5.27
  20 -18  -1   57.55    5.31
  20 -18  -2   61.03    5.42
  20 -18  -2   55.86    5.27
  20 -18  -3   55.45    5.18
  20 -18  -3   60.55    5.48
  20 -18  -4   42.96    4.34
  20 -18  -4   41.93    4.38
 -20  18   5   11.16    1.97
  20 -18  -5   10.97    2.18
  20 -18  -5    9.66    2.17
 -20  18   6   53.58    4.89
  20 -18  -6   54.49    5.02
  20 -18  -6   50.88    5.00
 -20  18   7    0.93    0.90
  20 -18  -7    0.25    1.20
  20 -18  -7    0.00    1.04
  20 -18  -8   16.20    2.64
  20 -18  -8   13.45    2.55
  20 -19  -1    6.90    1.78
 -20  19   2   13.75    2.23
  20 -19  -2   13.54    2.40
 -20  19   3   29.83    3.41
  20 -19  -3   38.17    3.99
  20 -19  -4   10.10    2.14
  20 -19  -5   12.98    2.42
 -20  19   6   45.11    4.43
 -20  20   1  102.73    7.80
  20 -20  -1  116.38    8.57
 -20  20   2   12.06    2.04
  20 -20  -2   12.28    2.29
  19  15  -6    2.39    1.69
  19  15  -7    8.76    2.39
  19  15  -8    8.49    2.48
 -19 -14   4   81.52    6.83
  19  14  -4   74.69    6.56
 -19 -14   5    5.32    1.88
  19  14  -5    3.17    1.68
 -19 -14   6   51.01    5.32
  19  14  -6   60.15    5.67
 -19 -14   7    7.19    2.15
 -19 -14   7    7.71    1.90
  19  14  -7    6.46    2.16
 -19 -14   8   42.85    4.25
 -19 -14   9   38.93    4.52
 -19 -14   9   34.42    3.86
  19  14  -9   44.75    4.77
 -19 -14  10   47.04    5.06
 -19 -14  10   49.01    4.58
  19  14 -10   41.77    4.84
 -19 -14  11   64.59    5.94
 -19 -14  11   53.18    5.00
 -19 -13   2   13.57    2.69
  19  13  -2   12.44    2.65
 -19 -13   3   -0.04    1.18
  19  13  -3    0.91    1.28
 -19 -13   4    3.24    1.62
  19  13  -4    1.36    1.52
 -19 -13   5    6.50    2.00
  19  13  -5    4.97    1.88
 -19 -13   6    5.45    1.83
 -19 -13   6    3.61    1.56
  19  13  -6    2.82    1.86
 -19 -13   7    4.00    1.47
  19  13  -7    1.11    1.53
 -19 -13   8    6.14    2.10
 -19 -13   8    6.87    1.78
  19  13  -8    5.13    2.07
 -19 -13   9    4.67    1.91
 -19 -13   9    4.85    1.68
 -19 -13  10    6.07    2.09
 -19 -13  10    5.61    1.91
  19  13 -10    6.61    2.18
 -19 -13  11   68.75    6.27
  19  13 -11   69.98    6.39
 -19 -13  12    1.27    1.60
 -19 -13  12    2.26    1.36
 -19 -12   1   18.24    3.12
  19  12  -1   21.96    3.28
 -19 -12   2   99.34    7.68
  19  12  -2   96.80    7.67
 -19 -12   3    9.27    2.19
  19  12  -3    8.32    2.27
  19  12  -4  100.32    7.87
 -19 -12   5   -0.37    1.04
 -19 -12   5    0.99    0.92
 -19 -12   6  144.55    9.90
 -19 -12   6  127.86    8.72
  19  12  -6  151.41   10.28
 -19 -12   7    4.59    1.86
 -19 -12   7    4.45    1.66
  19  12  -7    7.63    2.11
 -19 -12   8  151.79   10.29
 -19 -12   8  137.22    9.14
  19  12  -8  161.36   10.75
 -19 -12   9   42.79    4.63
 -19 -12   9   37.35    4.03
  19  12  -9   52.43    5.16
 -19 -12  10   56.64    5.53
  19  12 -10   66.93    6.06
  19  12 -11   62.37    5.91
 -19 -12  12    4.25    2.18
 -19 -12  12    4.70    1.72
  19  12 -12    6.58    1.92
 -19 -12  13   24.46    3.50
 -19 -12  13   17.80    2.83
 -19 -11   1    9.17    2.14
  19  11  -1    8.02    2.20
 -19 -11   2    4.16    1.63
  19  11  -2    3.20    1.68
 -19 -11   3   10.60    2.36
 -19 -11   3   11.73    2.10
  19  11  -3    8.57    2.36
 -19 -11   4    0.74    0.92
 -19 -11   5    6.49    1.89
 -19 -11   5    7.65    1.81
  19  11  -5    5.26    2.02
 -19 -11   6   16.59    2.80
 -19 -11   6   17.12    2.55
  19  11  -6   16.75    3.01
 -19 -11   7    0.86    1.10
 -19 -11   7    1.17    1.00
  19  11  -7    0.66    1.42
 -19 -11   8   16.76    2.91
 -19 -11   8   18.70    2.66
  19  11  -8   16.94    3.02
 -19 -11   9   19.21    3.06
  19  11  -9   22.96    3.37
 -19 -11  10   44.91    4.68
 -19 -11  10   42.11    4.19
  19  11 -10   45.59    4.85
 -19 -11  11   86.65    7.04
 -19 -11  11   83.32    6.39
  19  11 -11   97.92    7.04
 -19 -11  12   61.33    5.72
 -19 -11  12   55.58    5.00
  19  11 -12   64.98    5.97
  19  11 -12   62.64    5.33
 -19 -11  13  125.77    9.12
 -19 -11  13  124.69    8.45
  19  11 -13  136.09    9.60
  19  11 -13  135.41    8.93
 -19 -11  14   15.21    2.92
 -19 -11  14   17.81    2.71
 -19 -10   1   90.98    7.11
  19  10  -1   87.58    7.13
 -19 -10   2   43.02    4.49
 -19 -10   2   41.95    4.09
  19  10  -2   42.00    4.62
 -19 -10   3   80.84    6.25
  19  10  -3   96.88    7.59
 -19 -10   4  181.43   11.55
 -19 -10   4  173.50   10.72
  19  10  -4  192.42   12.11
 -19 -10   5   16.48    2.79
 -19 -10   5   18.24    2.61
 -19 -10   6  159.02   10.48
 -19 -10   6  161.40   10.09
  19  10  -6  175.32   11.26
 -19 -10   7    1.43    1.19
 -19 -10   7    1.67    1.20
  19  10  -7    1.64    1.43
 -19 -10   8  176.27   11.17
 -19 -10   8  153.02    9.86
  19  10  -8  175.22   11.29
 -19 -10   9   12.04    2.42
 -19 -10   9   10.63    2.15
  19  10  -9    9.72    2.40
 -19 -10  10  109.77    8.02
 -19 -10  10   91.87    6.86
  19  10 -10  115.15    7.85
 -19 -10  11   33.80    3.70
  19  10 -11   39.62    4.43
  19  10 -11   36.49    3.91
 -19 -10  12   30.61    3.83
 -19 -10  12   30.03    3.49
  19  10 -12   37.79    4.28
  19  10 -12   35.38    3.82
 -19 -10  13   41.53    4.36
 -19 -10  13   32.47    3.68
  19  10 -13   35.11    4.29
  19  10 -13   36.69    3.97
 -19 -10  14   17.93    2.77
 -19 -10  14   12.69    2.36
  19  10 -14   13.02    2.82
  19  10 -14   10.75    2.54
 -19 -10  15    6.25    1.97
 -19 -10  15    4.50    1.73
 -19  -9   1   54.31    5.07
 -19  -9   1   50.17    4.60
  19   9  -1   51.44    5.12
 -19  -9   2    0.16    0.89
 -19  -9   2   -0.39    0.85
  19   9  -2   -0.09    1.25
 -19  -9   3   35.00    3.81
 -19  -9   3   29.71    3.37
  19   9  -3   25.32    3.64
 -19  -9   4    1.06    1.19
 -19  -9   4    2.51    1.17
  19   9  -4    1.92    1.56
 -19  -9   5    0.63    0.93
 -19  -9   5    0.19    0.96
  19   9  -5    0.30    1.19
 -19  -9   6   11.26    2.24
 -19  -9   6   13.92    2.29
  19   9  -6    8.27    2.41
 -19  -9   7   11.35    2.35
 -19  -9   7   12.82    2.21
  19   9  -7   12.32    2.53
 -19  -9   8   33.90    3.78
 -19  -9   8   27.88    3.39
  19   9  -8   32.44    3.88
 -19  -9   9   -0.19    0.92
 -19  -9   9    0.77    1.01
  19   9  -9    1.24    1.25
 -19  -9  10   92.75    6.85
  19   9 -10  108.61    8.03
  19   9 -10  107.78    7.50
 -19  -9  11   33.91    3.99
 -19  -9  11   37.31    3.88
  19   9 -11   42.77    4.59
  19   9 -11   43.29    4.18
 -19  -9  12  159.92   10.59
 -19  -9  12  167.22   10.44
  19   9 -12  177.13   11.47
  19   9 -12  211.90   12.17
 -19  -9  13   34.87    3.99
 -19  -9  13   33.29    3.73
  19   9 -13   43.39    4.55
  19   9 -13   41.77    4.19
 -19  -9  14  104.71    7.90
 -19  -9  14  111.19    7.76
  19   9 -14  121.95    8.76
  19   9 -14  132.83    8.71
 -19  -9  15  169.04   10.90
 -19  -9  15  154.72    9.90
 -19  -9  16   72.11    6.19
 -19  -8   1  195.07   12.12
 -19  -8   1  187.43   11.34
  19   8  -1  207.72   12.74
 -19  -8   2    2.38    1.26
 -19  -8   2    1.30    1.02
  19   8  -2    1.40    1.39
 -19  -8   3  175.39   11.18
 -19  -8   3  171.92   10.59
  19   8  -3  186.42   11.76
 -19  -8   4   89.67    6.83
 -19  -8   4   77.40    6.07
  19   8  -4   92.64    7.11
 -19  -8   5  184.42   11.66
  19   8  -5  211.09   12.78
 -19  -8   6  165.29   10.49
 -19  -8   6  137.96    9.12
  19   8  -6  171.84   10.93
 -19  -8   7   68.07    5.77
 -19  -8   7   65.72    5.38
  19   8  -7   71.22    6.10
 -19  -8   8  212.77   12.83
 -19  -8   8  191.70   11.62
  19   8  -8  227.92   13.15
 -19  -8   9   10.81    2.14
  19   8  -9   14.17    2.74
  19   8  -9   13.32    2.34
 -19  -8  10  244.46   14.30
 -19  -8  10  220.30   12.92
  19   8 -10  248.25   14.65
  19   8 -10  242.07   13.83
 -19  -8  11    5.33    1.57
 -19  -8  11    3.95    1.43
  19   8 -11    4.20    1.89
  19   8 -11    5.37    1.78
 -19  -8  12  134.27    9.09
 -19  -8  12  118.82    8.14
  19   8 -12  129.32    9.13
  19   8 -12  140.58    9.08
 -19  -8  13    6.75    1.74
 -19  -8  13    3.53    1.54
  19   8 -13    6.20    1.97
  19   8 -13    4.32    1.89
 -19  -8  14   48.12    4.72
 -19  -8  14   47.75    4.46
  19   8 -14   48.55    4.94
  19   8 -14   48.09    4.78
 -19  -8  16    1.95    1.32
  19   8 -16    3.37    1.77
  19   8 -16   -0.70    1.89
 -19  -8  17    5.67    1.79
 -19  -8  17    3.41    1.80
 -19  -7   1   65.69    5.67
 -19  -7   1   67.51    5.49
  19   7  -1   80.18    6.40
 -19  -7   2    0.72    0.87
 -19  -7   2    0.16    0.83
  19   7  -2   -0.51    1.09
 -19  -7   3   32.95    3.69
 -19  -7   3   27.90    3.32
  19   7  -3   36.27    4.00
 -19  -7   4    0.09    0.98
  19   7  -4    1.98    1.33
 -19  -7   5    1.48    1.05
 -19  -7   5    1.35    1.00
  19   7  -5    1.73    1.34
 -19  -7   6    2.65    1.16
 -19  -7   6    1.28    1.08
  19   7  -6    0.76    1.32
 -19  -7   7   16.79    2.66
 -19  -7   7   18.40    2.57
  19   7  -7   18.61    3.16
  19   7  -7   18.48    2.81
 -19  -7   8   13.96    2.36
  19   7  -8   17.91    2.73
 -19  -7   9    3.55    1.40
 -19  -7   9    1.99    1.19
  19   7  -9    3.55    1.64
  19   7  -9    3.95    1.53
 -19  -7  10  125.94    8.72
 -19  -7  10  123.12    8.23
  19   7 -10  140.60    9.43
  19   7 -10  131.13    8.62
 -19  -7  11    6.07    1.67
 -19  -7  11    5.75    1.58
  19   7 -11    7.62    2.10
  19   7 -11    7.06    1.95
 -19  -7  12  254.40   14.87
 -19  -7  12  232.68   13.64
  19   7 -12  295.71   16.56
  19   7 -12  293.02   16.05
 -19  -7  13    3.37    1.28
 -19  -7  13    2.07    1.35
  19   7 -13    2.21    1.60
  19   7 -13    2.93    1.69
 -19  -7  14  206.46   12.81
 -19  -7  14  220.13   12.94
  19   7 -14  255.99   14.84
  19   7 -14  265.21   14.92
 -19  -7  15  107.04    7.81
 -19  -7  15  100.58    7.33
  19   7 -15  125.78    8.69
 -19  -7  16  184.98   11.56
  19   7 -16  171.28   11.27
 -19  -7  17  164.19   10.66
 -19  -7  17  165.01   10.55
 -19  -6   1   70.56    5.90
 -19  -6   1   68.79    5.54
  19   6  -1   80.05    6.36
 -19  -6   2   20.70    2.90
 -19  -6   2   20.28    2.71
  19   6  -2   20.11    3.05
 -19  -6   3  183.39   11.49
  19   6  -3  204.11   12.43
 -19  -6   4    7.02    1.81
 -19  -6   4    7.94    1.73
  19   6  -4    6.02    1.96
 -19  -6   5  231.27   13.57
 -19  -6   5  218.54   12.69
  19   6  -5  229.82   13.72
 -19  -6   6   61.24    5.26
 -19  -6   6   53.66    4.77
  19   6  -6   65.68    5.66
  19   6  -6   56.01    5.04
 -19  -6   7  111.88    7.65
  19   6  -7  124.06    8.20
 -19  -6   8  107.52    7.68
 -19  -6   8  103.04    7.19
  19   6  -8  111.84    8.03
  19   6  -8  105.41    7.41
 -19  -6   9   44.19    4.44
 -19  -6   9   50.62    4.41
 -19  -6  10  179.93   11.30
 -19  -6  10  172.14   10.67
  19   6 -10  204.27   12.38
  19   6 -10  211.98   12.21
 -19  -6  11   41.30    4.28
 -19  -6  11   43.37    4.14
  19   6 -11   44.42    4.57
  19   6 -11   51.57    4.61
 -19  -6  12  121.74    8.50
 -19  -6  12  118.39    8.07
  19   6 -12  148.23    9.57
  19   6 -12  132.62    8.78
 -19  -6  13    3.49    1.32
 -19  -6  13    1.79    1.22
  19   6 -13    4.10    1.63
  19   6 -13    3.63    1.79
 -19  -6  14   43.09    4.32
 -19  -6  14   42.93    4.18
  19   6 -14   46.42    4.66
  19   6 -14   42.47    4.55
 -19  -6  15   17.88    2.58
 -19  -6  15   13.38    2.41
 -19  -6  16    2.87    1.29
  19   6 -16    1.89    1.65
 -19  -6  17    4.53    1.56
  19   6 -17    3.07    1.74
  19   6 -17    1.95    2.00
 -19  -6  18   23.80    3.11
 -19  -6  18   19.63    3.08
 -19  -5   1   77.84    6.10
 -19  -5   1   64.04    5.37
  19   5  -1   77.66    6.22
 -19  -5   2    2.81    1.24
  19   5  -2    2.33    1.39
 -19  -5   3   36.04    3.79
 -19  -5   3   32.19    3.47
  19   5  -3   32.14    3.85
 -19  -5   4    8.37    1.82
 -19  -5   4    5.74    1.61
  19   5  -4    7.51    1.97
 -19  -5   5   14.05    2.23
 -19  -5   5   11.51    2.05
  19   5  -5    7.42    2.18
  19   5  -5   10.04    2.18
 -19  -5   6    0.08    0.96
  19   5  -6    1.92    1.11
 -19  -5   7   10.60    2.10
 -19  -5   7    9.68    1.90
  19   5  -7    9.75    2.26
  19   5  -7   10.86    2.09
 -19  -5   8    6.19    1.65
 -19  -5   8    6.78    1.63
  19   5  -8    8.63    2.01
  19   5  -8    6.58    1.84
 -19  -5   9    3.09    1.45
 -19  -5   9    3.67    1.34
  19   5  -9    5.42    1.73
  19   5  -9    6.23    1.70
 -19  -5  10   67.59    5.64
 -19  -5  10   62.21    5.22
  19   5 -10   71.31    5.96
  19   5 -10   75.44    5.82
  19   5 -11   53.40    5.13
  19   5 -11   59.43    5.10
 -19  -5  12  148.66    9.88
 -19  -5  12  144.90    9.40
  19   5 -12  173.58   10.86
  19   5 -12  199.75   11.57
 -19  -5  13   26.02    3.34
 -19  -5  13   28.74    3.36
  19   5 -13   35.59    3.90
  19   5 -13   34.18    3.93
 -19  -5  14  245.98   14.50
 -19  -5  14  247.79   14.25
  19   5 -14  274.16   15.62
  19   5 -14  304.36   16.77
 -19  -5  15   19.87    2.78
 -19  -5  15   16.84    2.73
  19   5 -15   18.43    2.91
  19   5 -15   20.57    3.36
 -19  -5  16  290.37   16.57
 -19  -5  16  302.84   16.85
  19   5 -16  312.60   17.46
 -19  -5  17   77.37    6.33
  19   5 -17   88.45    6.88
 -19  -5  18  167.20   10.68
 -19  -4   1   73.99    5.93
  19   4  -1   68.42    5.88
 -19  -4   2   31.40    3.53
 -19  -4   2   28.22    3.23
  19   4  -2   29.84    3.61
  19   4  -3  267.16   15.32
 -19  -4   4    2.19    1.13
 -19  -4   4    2.18    1.19
  19   4  -4    2.77    1.41
  19   4  -4    1.94    1.28
 -19  -4   5  246.96   14.03
  19   4  -5  271.59   15.04
 -19  -4   6    2.62    1.23
 -19  -4   6    2.78    1.12
  19   4  -6    2.57    1.41
  19   4  -6    3.88    1.39
 -19  -4   7  116.18    8.21
 -19  -4   7  118.29    7.94
  19   4  -7  134.98    8.97
  19   4  -7  133.00    8.54
 -19  -4   8   62.90    5.23
 -19  -4   8   51.97    4.62
 -19  -4   9  166.10   10.59
 -19  -4   9  162.53   10.10
  19   4  -9  181.05   11.19
  19   4  -9  193.59   11.36
 -19  -4  10  196.48   11.87
 -19  -4  10  168.17   10.44
  19   4 -10  193.60   11.81
  19   4 -10  201.82   11.84
 -19  -4  11  133.66    9.04
 -19  -4  11  132.28    8.65
  19   4 -11  140.03    9.32
  19   4 -11  152.76    9.57
 -19  -4  12  151.12    9.96
 -19  -4  12  157.10    9.80
  19   4 -12  168.68   10.60
  19   4 -12  173.14   10.67
 -19  -4  13   13.27    2.30
 -19  -4  13   12.11    2.20
  19   4 -13   18.07    2.67
  19   4 -13   13.31    2.73
 -19  -4  14   76.20    6.08
 -19  -4  14   70.65    5.72
  19   4 -14   78.55    6.20
  19   4 -14   75.48    6.32
 -19  -4  15   18.02    2.71
 -19  -4  15   16.50    2.68
  19   4 -15   22.56    3.03
  19   4 -15   20.78    3.31
 -19  -4  16    1.45    1.08
 -19  -4  16   -0.09    1.12
  19   4 -16    2.00    1.46
  19   4 -16    2.68    1.90
 -19  -4  17   28.04    3.41
 -19  -4  17   28.34    3.51
 -19  -4  18    9.98    2.13
 -19  -4  18   10.97    2.35
  19   4 -18   13.67    2.51
 -19  -4  19    4.78    1.62
 -19  -3   1   60.24    5.26
 -19  -3   1   59.00    4.98
  19   3  -1   63.90    5.51
 -19  -3   2   18.04    2.64
 -19  -3   2   15.45    2.42
  19   3  -2   19.34    2.83
 -19  -3   3   20.92    2.76
 -19  -3   3   16.60    2.53
  19   3  -3   18.59    2.87
  19   3  -3   19.41    2.74
 -19  -3   4    6.56    1.61
  19   3  -4    5.09    1.64
 -19  -3   5    5.17    1.56
  19   3  -5    5.73    1.72
  19   3  -5    6.06    1.70
 -19  -3   6    6.91    1.71
 -19  -3   6    7.27    1.64
  19   3  -6    7.11    1.90
  19   3  -6    7.55    1.84
 -19  -3   7    4.09    1.29
 -19  -3   7    2.72    1.27
  19   3  -7    3.20    1.40
  19   3  -7    1.70    1.22
 -19  -3   8    4.46    1.42
 -19  -3   8    4.41    1.37
  19   3  -8    4.42    1.68
  19   3  -8    4.46    1.53
 -19  -3   9   19.42    2.80
 -19  -3   9   20.39    2.65
  19   3  -9   20.22    2.90
  19   3  -9   21.09    2.85
 -19  -3  10   60.32    5.37
 -19  -3  10   64.50    5.28
  19   3 -10   72.88    5.82
  19   3 -10   77.86    5.91
 -19  -3  11  176.46   11.24
 -19  -3  11  181.44   10.96
  19   3 -11  212.61   12.46
  19   3 -11  193.91   11.68
 -19  -3  12  125.19    8.78
 -19  -3  12  122.07    8.28
  19   3 -12  154.33    9.70
  19   3 -12  156.03    9.77
 -19  -3  13   57.80    5.21
 -19  -3  13   55.15    4.89
  19   3 -13   66.89    5.54
  19   3 -13   64.75    5.63
 -19  -3  14  202.01   12.66
 -19  -3  14  209.62   12.49
  19   3 -14  241.48   13.85
  19   3 -14  253.31   14.54
 -19  -3  15    2.41    1.29
 -19  -3  15    1.28    1.31
  19   3 -15    3.69    1.57
  19   3 -15    3.11    1.91
 -19  -3  16  204.65   12.91
 -19  -3  16  217.42   13.07
  19   3 -16  244.84   14.10
  19   3 -16  270.51   15.46
 -19  -3  17    0.75    1.16
 -19  -3  17    1.73    1.25
  19   3 -17    1.59    1.47
  19   3 -17    2.27    1.83
 -19  -3  18  186.70   12.02
 -19  -3  18  179.15   11.68
  19   3 -18  229.22   13.32
  19   3 -18  231.68   13.91
 -19  -3  19   46.75    4.70
 -19  -3  19   44.02    4.75
  19   3 -19   51.44    4.95
  19   3 -19   49.35    5.25
 -19  -2   1   90.48    6.79
 -19  -2   1   87.17    6.41
  19   2  -1   92.46    6.93
 -19  -2   2   51.60    4.72
 -19  -2   2   52.70    4.61
  19   2  -2   58.46    5.09
 -19  -2   3  203.23   12.19
 -19  -2   3  185.67   11.18
  19   2  -3  203.27   12.48
  19   2  -3  197.31   11.76
 -19  -2   4    5.07    1.54
  19   2  -4    5.44    1.60
 -19  -2   5  253.72   14.69
 -19  -2   5  249.77   14.09
  19   2  -5  270.81   15.24
  19   2  -5  268.37   14.86
 -19  -2   6    5.03    1.53
 -19  -2   6    4.77    1.43
  19   2  -6    5.08    1.61
  19   2  -6    6.19    1.67
 -19  -2   7  321.64   17.84
 -19  -2   7  304.79   16.60
  19   2  -7  298.36   16.69
  19   2  -7  337.29   17.92
 -19  -2   8   21.11    2.90
 -19  -2   8   18.20    2.59
  19   2  -8   23.23    2.99
  19   2  -8   19.71    2.82
 -19  -2   9  449.80   24.33
 -19  -2   9  437.88   22.93
  19   2  -9  545.77   27.46
  19   2  -9  520.72   26.25
 -19  -2  10  105.39    7.64
 -19  -2  10  100.94    7.11
  19   2 -10  114.50    7.88
  19   2 -10  106.59    7.51
 -19  -2  11  189.42   11.85
 -19  -2  11  183.52   11.00
 -19  -2  12  114.95    8.22
 -19  -2  12  101.94    7.20
  19   2 -12   99.76    7.41
  19   2 -12  121.10    8.24
  19   2 -13   29.99    3.49
  19   2 -13   24.63    3.55
 -19  -2  14   24.27    3.13
  19   2 -14   27.72    3.33
  19   2 -14   27.26    3.63
 -19  -2  15    1.18    1.08
 -19  -2  15    1.10    1.02
  19   2 -15    0.37    1.27
  19   2 -15    1.02    1.48
 -19  -2  16    2.98    1.38
 -19  -2  16    5.83    1.63
  19   2 -16    2.66    1.53
  19   2 -16    1.75    1.71
 -19  -2  17   -0.75    1.00
 -19  -2  17    0.33    1.01
  19   2 -17   -0.48    1.22
  19   2 -17    1.42    1.52
 -19  -2  18    0.81    1.11
 -19  -2  18    0.20    1.18
  19   2 -18    1.18    1.36
  19   2 -18    0.68    1.62
 -19  -2  19    2.68    1.60
 -19  -2  19    2.33    1.56
 -19  -2  20    8.07    2.10
 -19  -2  20    7.62    2.05
 -19  -1   1   11.86    2.22
 -19  -1   1   10.14    2.03
  19   1  -1   14.22    2.38
 -19  -1   2   84.40    6.53
 -19  -1   2   82.91    6.19
  19   1  -2   89.58    6.71
  19   1  -2   90.02    6.59
 -19  -1   3   43.65    4.16
  19   1  -3   50.58    4.44
 -19  -1   4   11.41    2.29
 -19  -1   4   11.70    2.05
  19   1  -4   10.00    2.18
  19   1  -4   11.93    2.11
 -19  -1   5   32.56    3.60
 -19  -1   5   29.22    3.26
  19   1  -5   33.11    3.62
  19   1  -5   27.61    3.30
 -19  -1   6    2.11    1.07
 -19  -1   6    0.66    0.90
  19   1  -6    1.22    1.07
  19   1  -6    0.06    1.21
 -19  -1   7    6.10    1.63
 -19  -1   7    4.16    1.42
  19   1  -7    5.34    1.63
  19   1  -7    5.54    1.63
 -19  -1   8    1.32    1.02
 -19  -1   8    1.06    0.92
  19   1  -8    0.60    1.09
  19   1  -8    0.54    1.24
 -19  -1   9   79.11    6.09
  19   1  -9   90.33    6.70
  19   1  -9  100.11    6.98
 -19  -1  10   34.87    3.70
 -19  -1  10   36.93    4.12
  19   1 -10   42.13    4.14
  19   1 -10   42.13    4.16
 -19  -1  11  216.99   12.57
 -19  -1  11  231.02   13.99
 -19  -1  12   64.60    5.34
 -19  -1  12   64.18    5.75
  19   1 -12   76.78    5.96
  19   1 -12   75.46    6.10
 -19  -1  13   72.76    5.77
 -19  -1  13   63.95    5.86
  19   1 -13   81.21    6.21
  19   1 -13   85.49    6.66
 -19  -1  14  120.86    8.35
 -19  -1  14  122.38    8.85
  19   1 -14  140.52    9.13
  19   1 -14  153.55    9.91
 -19  -1  15    9.79    2.18
 -19  -1  15   12.74    2.36
  19   1 -15   12.70    2.35
  19   1 -15   11.76    2.70
 -19  -1  16  217.97   13.17
 -19  -1  16  210.25   13.24
  19   1 -16  257.74   14.51
  19   1 -16  256.24   14.94
 -19  -1  17    2.11    1.19
 -19  -1  17    1.04    1.12
  19   1 -17   -0.31    1.31
  19   1 -17   -1.12    1.40
 -19  -1  18  232.60   14.03
 -19  -1  18  211.06   13.37
  19   1 -18  255.16   14.56
  19   1 -18  264.68   15.49
 -19  -1  19   57.46    5.50
 -19  -1  19   54.80    5.35
  19   1 -19   66.39    5.62
  19   1 -19   69.78    6.23
 -19  -1  20  146.87   10.22
 -19  -1  20  154.91   10.37
 -19   0   1   38.57    4.00
 -19   0   1   39.47    3.81
  19   0  -1   41.26    4.12
  19   0  -1   35.74    3.96
 -19   0   2  118.75    8.22
 -19   0   2  107.17    7.39
  19   0  -2  128.71    8.37
 -19   0   3  191.96   11.39
  19   0  -3  207.44   12.02
 -19   0   4  287.30   16.63
 -19   0   4  311.57   16.78
  19   0  -4  321.39   17.47
  19   0  -4  321.05   17.24
 -19   0   5  327.53   18.49
 -19   0   5  319.95   17.25
  19   0  -5  329.38   17.91
  19   0  -5  335.69   17.94
 -19   0   6  129.21    8.49
  19   0  -6  142.28    9.22
  19   0  -6  153.47    9.46
 -19   0   7  519.57   26.52
 -19   0   7  556.42   29.71
  19   0  -7  580.09   29.16
  19   0  -7  585.56   29.20
 -19   0   8    2.34    1.15
 -19   0   8    2.79    1.42
  19   0  -8    3.55    1.36
  19   0  -8    2.59    1.52
  19   0  -9  634.61   31.86
  19   0  -9  642.75   32.04
 -19   0  10   20.72    2.77
 -19   0  10   23.73    3.20
 -19   0  11  215.57   12.63
 -19   0  11  233.53   13.99
  19   0 -11  240.10   13.76
  19   0 -11  246.42   14.11
 -19   0  12   32.09    3.55
 -19   0  12   32.18    3.84
  19   0 -12   37.85    3.91
  19   0 -12   40.76    4.24
 -19   0  13   46.42    4.33
 -19   0  13   50.00    4.77
  19   0 -13   45.28    4.45
  19   0 -13   41.53    4.69
  19   0 -14   30.50    3.54
  19   0 -14   30.06    3.84
 -19   0  15    8.94    2.01
 -19   0  15    8.55    2.13
  19   0 -15   10.89    2.11
  19   0 -15    8.07    2.44
 -19   0  16    4.03    1.69
 -19   0  16    8.17    1.95
  19   0 -16    7.02    1.82
  19   0 -16    4.63    2.02
 -19   0  17    8.72    2.14
 -19   0  17   10.35    2.25
  19   0 -17   10.53    2.28
  19   0 -17   12.26    2.63
 -19   0  18    2.05    1.31
 -19   0  18    0.41    1.13
  19   0 -18    1.70    1.42
  19   0 -18    0.70    1.72
 -19   0  19    4.36    1.67
 -19   0  19    3.30    1.70
  19   0 -19    4.69    1.77
  19   0 -19    3.13    1.89
 -19   0  20   15.42    2.89
  19   0 -20   22.69    3.12
  19   0 -20   19.77    3.37
 -19   1   1    0.65    0.99
 -19   1   1    0.19    0.86
  19  -1  -1    0.47    1.09
  19  -1  -1    0.87    1.07
  19  -1  -1    1.23    0.67
  19  -1  -1    0.76    0.63
 -19   1   2  225.92   13.02
  19  -1  -2  252.84   14.13
 -19   1   3   54.51    4.71
  19  -1  -3   61.46    5.03
 -19   1   4   44.37    4.13
  19  -1  -4   47.43    4.38
  19  -1  -4   48.05    4.33
 -19   1   5   35.09    3.61
 -19   1   5   40.96    4.24
  19  -1  -5   36.43    3.84
  19  -1  -5   38.36    3.81
 -19   1   6    7.47    1.66
 -19   1   6    8.66    2.07
  19  -1  -6    9.21    1.91
  19  -1  -6    6.81    1.90
 -19   1   7   16.67    2.45
 -19   1   7   15.80    2.68
  19  -1  -7   17.42    2.65
  19  -1  -7   19.68    2.69
 -19   1   8    5.32    1.43
 -19   1   8    4.40    1.63
  19  -1  -8    4.26    1.61
  19  -1  -8    4.98    1.64
 -19   1   9   97.08    6.88
 -19   1   9   92.15    7.29
  19  -1  -9  109.52    7.57
  19  -1  -9  118.60    7.91
 -19   1  10    4.03    1.37
 -19   1  10    2.37    1.33
  19  -1 -10    3.17    1.52
  19  -1 -10    4.37    1.66
 -19   1  11  164.48   10.25
 -19   1  11  166.03   10.90
  19  -1 -11  185.75   11.23
  19  -1 -11  209.07   12.26
 -19   1  12   19.26    2.67
 -19   1  12   16.40    2.80
  19  -1 -12   23.68    2.99
  19  -1 -12   20.66    3.13
 -19   1  13  140.42    9.22
 -19   1  13  143.59    9.77
  19  -1 -13  157.27    9.92
  19  -1 -13  172.22   10.80
 -19   1  14   87.64    6.76
 -19   1  14   88.42    7.12
  19  -1 -14  115.40    7.76
  19  -1 -14  113.29    8.05
 -19   1  15  135.78    9.18
 -19   1  15  127.96    9.14
  19  -1 -15  160.97    9.97
  19  -1 -15  163.72   10.56
 -19   1  16  300.74   17.08
 -19   1  16  289.55   16.94
  19  -1 -16  346.80   18.67
  19  -1 -16  382.16   20.54
 -19   1  17   19.52    2.92
 -19   1  18  352.00   19.81
  19  -1 -18  425.71   22.86
 -19   1  19    4.92    1.60
 -19   1  19    3.05    1.59
  19  -1 -19    4.71    2.02
 -19   1  20  272.51   16.14
 -19   1  20  267.06   15.71
 -19   1  21   11.28    2.63
 -19   2   1   12.02    2.34
 -19   2   1   12.87    2.22
  19  -2  -1   17.93    2.21
  19  -2  -1   16.87    2.11
 -19   2   2  352.79   18.51
 -19   2   2  285.61   18.31
  19  -2  -2  357.73   18.79
 -19   2   3    3.77    1.30
  19  -2  -3    2.00    1.42
 -19   2   4  614.45   30.89
 -19   2   4  616.36   32.30
  19  -2  -4  690.61   34.09
  19  -2  -4  728.55   35.42
 -19   2   5  125.24    8.32
 -19   2   5  141.01    9.54
  19  -2  -5  151.61    9.46
  19  -2  -5  150.58    9.34
 -19   2   6  390.11   20.41
 -19   2   6  364.70   20.24
  19  -2  -6  414.15   21.60
  19  -2  -6  424.67   21.87
 -19   2   7  469.86   24.26
 -19   2   7  501.22   26.37
  19  -2  -7  524.99   26.69
  19  -2  -7  537.65   27.03
 -19   2   8   62.53    5.12
 -19   2   8   67.18    5.74
  19  -2  -8   68.06    5.49
  19  -2  -8   64.08    5.43
 -19   2   9  579.67   29.39
 -19   2   9  608.22   31.41
  19  -2  -9  666.54   33.07
  19  -2  -9  684.25   33.76
 -19   2  10    7.69    1.69
 -19   2  10    4.86    1.72
  19  -2 -10    4.92    1.64
  19  -2 -10    6.49    1.96
 -19   2  11  280.64   15.73
 -19   2  11  299.80   17.04
  19  -2 -11  312.48   17.08
  19  -2 -11  331.72   18.07
 -19   2  12    4.67    1.48
 -19   2  12    5.03    1.60
  19  -2 -12    6.01    1.73
  19  -2 -12    4.95    1.92
 -19   2  13  102.51    7.44
 -19   2  13  118.78    8.39
  19  -2 -13  125.57    8.32
  19  -2 -13  121.28    8.56
 -19   2  14   33.77    3.76
 -19   2  14   36.11    4.10
  19  -2 -14   38.14    3.95
  19  -2 -14   40.79    4.46
 -19   2  15   41.80    4.36
  19  -2 -15   47.80    4.61
  19  -2 -15   51.33    5.02
 -19   2  16    9.24    2.07
  19  -2 -16    9.66    2.54
 -19   2  17    6.96    1.92
 -19   2  17    7.75    2.01
  19  -2 -17    7.75    2.03
  19  -2 -17    7.08    2.41
 -19   2  18   10.49    2.26
 -19   2  18   11.48    2.33
  19  -2 -18   11.62    2.35
  19  -2 -18   10.65    2.58
 -19   2  19   11.27    2.50
 -19   2  19   14.40    2.55
  19  -2 -19   16.13    2.60
 -19   2  20   41.84    4.54
  19  -2 -20   54.89    4.93
 -19   2  21    3.50    1.68
 -19   2  21    4.66    1.73
 -19   3   1    5.14    1.48
 -19   3   1    3.79    1.52
 -19   3   1    4.86    1.21
 -19   3   1    3.83    1.15
  19  -3  -1    4.53    1.60
  19  -3  -1    6.13    1.56
  19  -3  -1    5.63    1.38
  19  -3  -1    5.91    1.28
 -19   3   2  315.55   17.11
  19  -3  -2  334.10   17.93
  19  -3  -2  341.09   20.75
  19  -3  -2  338.22   20.61
 -19   3   3   15.35    2.20
 -19   3   3    9.60    1.68
  19  -3  -3   14.83    2.26
  19  -3  -3   13.63    1.82
  19  -3  -3   13.33    1.79
 -19   3   4   95.78    6.77
 -19   3   4  111.18    8.25
  19  -3  -4  103.84    7.33
  19  -3  -4   98.48    7.03
 -19   3   5    8.17    1.69
 -19   3   5    9.77    2.06
  19  -3  -5    6.88    1.82
  19  -3  -5    7.52    1.85
 -19   3   6    7.49    1.67
 -19   3   6    8.89    2.08
  19  -3  -6    5.96    1.72
  19  -3  -6    8.61    1.90
 -19   3   7    4.25    1.44
 -19   3   7    5.11    1.76
  19  -3  -7    8.12    1.76
  19  -3  -7    9.52    2.02
 -19   3   8    4.64    1.37
 -19   3   8    3.56    1.44
  19  -3  -8    4.83    1.54
  19  -3  -8    2.84    1.61
 -19   3   9   79.35    5.99
 -19   3   9   72.72    6.24
  19  -3  -9   83.92    6.33
  19  -3  -9   94.12    6.83
 -19   3  10    0.68    1.05
 -19   3  10    1.66    1.11
  19  -3 -10    0.87    1.19
  19  -3 -10    1.30    1.40
 -19   3  11  243.43   14.00
 -19   3  11  245.40   14.65
  19  -3 -11  274.46   15.27
  19  -3 -11  286.00   16.01
 -19   3  12    1.64    1.07
  19  -3 -12    1.14    1.16
  19  -3 -12    1.36    1.60
 -19   3  13  323.78   17.89
  19  -3 -13  378.59   20.37
 -19   3  14   36.43    3.90
 -19   3  14   34.19    4.08
  19  -3 -14   39.56    4.44
 -19   3  15  275.85   16.02
 -19   3  15  303.47   17.26
  19  -3 -15  321.11   17.44
  19  -3 -15  348.20   19.21
 -19   3  16  142.63    9.62
 -19   3  16  146.75    9.89
  19  -3 -16  164.15   10.16
  19  -3 -16  154.02   10.47
 -19   3  17  159.27   10.49
 -19   3  17  157.46   10.51
  19  -3 -17  186.12   11.14
 -19   3  18  204.91   12.86
  19  -3 -18  274.64   15.21
 -19   3  19   15.95    2.74
 -19   3  19   15.30    2.63
  19  -3 -19   17.24    2.71
 -19   3  20  236.82   14.51
 -19   3  20  213.66   13.37
  19  -3 -20  296.00   16.19
 -19   3  21   24.20    3.51
 -19   3  21   21.48    3.29
 -19   4   1   60.95    5.10
 -19   4   1   67.32    5.79
 -19   4   1   65.95    5.44
  19  -4  -1   64.86    5.41
  19  -4  -1   70.11    5.48
  19  -4  -1   78.15    5.96
 -19   4   2  319.54   17.21
 -19   4   2  310.19   17.65
 -19   4   2  290.70   18.41
 -19   4   2  272.11   17.45
  19  -4  -2  360.18   19.21
  19  -4  -2  350.95   18.55
  19  -4  -2  400.26   23.71
  19  -4  -2  376.91   22.58
 -19   4   3   36.29    3.81
  19  -4  -3   45.80    4.21
  19  -4  -3   45.89    4.07
  19  -4  -3   50.67    4.25
 -19   4   4  468.03   28.36
  19  -4  -4  553.72   27.78
  19  -4  -4  572.16   33.41
 -19   4   5   47.35    4.18
  19  -4  -5   51.29    4.49
  19  -4  -5   40.17    3.76
 -19   4   6  411.69   21.69
  19  -4  -6  456.46   23.66
  19  -4  -6  510.45   25.67
 -19   4   7  234.01   13.40
 -19   4   7  237.79   14.67
  19  -4  -7  263.69   14.72
  19  -4  -7  272.03   15.09
 -19   4   8  275.01   15.44
  19  -4  -8  316.37   17.20
  19  -4  -8  338.31   18.13
 -19   4   9  263.42   14.84
  19  -4  -9  301.09   16.61
 -19   4  10  190.41   11.47
  19  -4 -10  212.76   12.72
 -19   4  11  117.42    8.04
  19  -4 -11  138.14    9.18
 -19   4  12    4.82    1.49
 -19   4  12    6.27    1.84
  19  -4 -12    3.16    2.02
 -19   4  13  176.53   11.02
 -19   4  13  171.14   11.14
  19  -4 -13  204.07   11.93
  19  -4 -13  202.47   12.47
 -19   4  14    0.77    0.89
 -19   4  14   -0.21    1.04
  19  -4 -14    0.16    1.09
 -19   4  15   86.32    6.74
 -19   4  15   84.62    6.81
  19  -4 -15   97.13    6.91
 -19   4  16   11.21    2.33
  19  -4 -16   11.05    2.24
 -19   4  17    1.14    1.10
 -19   4  17    2.19    1.32
  19  -4 -17    0.48    1.29
 -19   4  18    1.40    1.09
 -19   4  18   -0.36    1.03
  19  -4 -18    0.19    1.04
 -19   4  19   17.34    2.83
 -19   4  19   13.54    2.62
  19  -4 -19   23.06    3.02
 -19   4  20   12.51    2.59
 -19   4  20   12.89    2.48
  19  -4 -20   17.58    2.76
 -19   4  21    1.48    1.31
 -19   4  21    2.17    1.37
  19  -4 -21    2.10    1.65
 -19   5   1   23.39    2.80
 -19   5   1   24.41    3.13
 -19   5   1   22.20    2.70
 -19   5   1   18.21    2.49
  19  -5  -1   23.82    2.97
 -19   5   2  204.35   11.80
 -19   5   2  205.26   12.49
 -19   5   2  175.66   11.99
  19  -5  -2  207.15   12.17
  19  -5  -2  208.59   12.13
  19  -5  -2  190.72   12.69
  19  -5  -2  200.79   13.12
 -19   5   3    8.27    1.66
 -19   5   3    8.39    1.93
 -19   5   3    6.60    1.42
 -19   5   3    5.66    1.33
  19  -5  -3    5.99    1.52
  19  -5  -3    8.45    1.55
 -19   5   4   74.88    5.54
 -19   5   4   67.58    5.50
 -19   5   4   58.13    5.05
  19  -5  -4   78.25    5.92
 -19   5   5   39.81    3.86
 -19   5   5   35.86    3.63
 -19   5   5   37.90    3.72
  19  -5  -5   44.16    4.25
  19  -5  -5   46.74    4.00
  19  -5  -5   49.47    4.17
 -19   5   6    1.18    0.92
 -19   5   6    1.12    0.65
  19  -5  -6    0.80    1.28
  19  -5  -6    2.15    0.75
 -19   5   7    4.64    1.27
 -19   5   7    2.50    0.90
 -19   5   7    3.88    0.96
  19  -5  -7    3.41    1.53
 -19   5   8    2.48    1.11
 -19   5   8    2.34    0.77
  19  -5  -8    1.44    1.60
 -19   5   9   11.62    2.04
 -19   5   9   10.28    2.22
  19  -5  -9   11.28    2.46
  19  -5  -9   10.83    1.63
 -19   5  10   10.34    2.08
 -19   5  10   11.53    2.27
  19  -5 -10   13.63    2.29
  19  -5 -10   12.68    2.58
 -19   5  11   88.02    6.61
 -19   5  11   94.96    7.19
  19  -5 -11   94.74    6.84
  19  -5 -11  103.01    7.58
 -19   5  12  103.97    7.45
 -19   5  12  105.08    7.75
  19  -5 -12  115.38    7.76
 -19   5  13  214.25   12.91
 -19   5  13  225.50   13.59
  19  -5 -13  258.66   14.37
  19  -5 -13  243.87   15.37
 -19   5  14    0.31    1.13
 -19   5  14    0.88    1.11
  19  -5 -14    0.14    1.08
 -19   5  15  313.30   17.83
  19  -5 -15  388.02   20.26
  19  -5 -15  340.52   20.94
 -19   5  16   18.02    2.83
 -19   5  16   17.18    2.86
  19  -5 -16   21.68    2.89
 -19   5  17  187.40   11.92
 -19   5  17  186.28   11.82
  19  -5 -17  241.83   13.55
  19  -5 -18   95.86    7.10
  19  -5 -19  171.55   10.81
 -19   5  20   89.82    7.46
  19  -5 -20  119.72    8.16
  19  -5 -21  149.58    9.89
 -19   6   1  179.47   10.82
 -19   6   1  191.47   11.90
 -19   6   1  171.77   11.65
  19  -6  -1  189.26   11.40
  19  -6  -1  229.83   14.49
  19  -6  -1  202.95   13.26
 -19   6   2  185.54   10.93
 -19   6   2  184.10   11.51
 -19   6   2  158.52   11.11
 -19   6   2  156.87   10.88
  19  -6  -2  192.45   11.41
  19  -6  -2  220.16   13.91
  19  -6  -2  205.83   13.31
 -19   6   3   48.31    4.40
 -19   6   3   54.33    5.04
 -19   6   3   49.80    4.62
 -19   6   3   46.94    4.37
  19  -6  -3   58.31    4.94
  19  -6  -3   58.83    4.97
  19  -6  -3   64.30    5.17
  19  -6  -3   67.50    5.35
 -19   6   4  296.70   16.27
 -19   6   4  330.15   18.24
 -19   6   4  275.24   17.66
  19  -6  -4  322.36   17.49
  19  -6  -4  330.35   17.83
  19  -6  -4  350.60   21.31
 -19   6   5   -0.06    0.92
 -19   6   5    0.79    1.08
 -19   6   5    2.15    0.88
 -19   6   5    2.22    0.76
  19  -6  -5    0.05    1.07
  19  -6  -5    1.12    1.28
  19  -6  -5    2.08    0.95
  19  -6  -5    1.89    0.93
 -19   6   6  411.73   21.45
 -19   6   6  424.94   22.61
 -19   6   6  332.78   21.44
 -19   6   6  365.44   22.69
  19  -6  -6  455.36   23.26
  19  -6  -6  458.98   23.68
  19  -6  -6  470.16   27.73
  19  -6  -6  468.37   27.75
 -19   6   7    7.62    1.66
 -19   6   7    8.42    1.96
 -19   6   7    5.57    1.39
 -19   6   7    6.02    1.47
  19  -6  -7    9.79    1.85
  19  -6  -7   10.81    2.31
  19  -6  -7    8.92    1.52
  19  -6  -7    8.66    1.60
 -19   6   8  358.39   19.18
 -19   6   8  409.19   21.72
 -19   6   8  311.65   19.79
 -19   6   8  341.13   21.21
  19  -6  -8  372.59   19.83
  19  -6  -8  413.20   21.84
  19  -6  -8  406.94   24.32
  19  -6  -8  416.43   24.93
 -19   6   9   32.78    3.41
 -19   6   9   38.23    3.93
 -19   6   9   25.49    2.97
 -19   6   9   25.88    3.04
  19  -6  -9   35.21    3.57
  19  -6  -9   33.01    3.24
  19  -6  -9   30.34    3.22
 -19   6  10  291.15   16.20
 -19   6  10  340.04   18.49
 -19   6  10  260.55   16.83
 -19   6  10  271.58   17.38
  19  -6 -10  330.43   17.66
  19  -6 -10  341.11   20.68
  19  -6 -10  370.03   22.17
 -19   6  11   71.41    5.49
 -19   6  11   79.38    6.05
 -19   6  11   43.95    4.41
 -19   6  11   47.59    4.56
  19  -6 -11   84.60    5.91
  19  -6 -11   69.59    5.40
  19  -6 -11   64.53    5.26
 -19   6  12   35.26    3.65
 -19   6  12   37.58    3.89
 -19   6  12   21.69    2.87
 -19   6  12   22.33    2.91
  19  -6 -12   39.93    3.73
  19  -6 -12   35.68    3.39
  19  -6 -12   33.14    3.33
 -19   6  13   62.01    5.61
 -19   6  13   65.81    5.73
  19  -6 -13  125.56    7.78
  19  -6 -13  117.43    7.97
  19  -6 -13  123.29    8.26
 -19   6  14    1.99    1.19
 -19   6  14    2.34    1.29
 -19   6  14    1.15    0.90
 -19   6  14    1.19    0.88
  19  -6 -14    0.36    1.02
  19  -6 -14    1.28    0.99
  19  -6 -14    0.63    1.02
 -19   6  15   79.69    6.42
 -19   6  15   79.55    6.43
  19  -6 -15   92.28    6.59
  19  -6 -15   73.59    6.12
 -19   6  16    2.71    1.49
 -19   6  16    2.76    1.48
  19  -6 -16    2.70    1.32
 -19   6  17    0.46    1.10
 -19   6  17    2.64    1.32
  19  -6 -17    1.24    1.18
 -19   6  18    1.17    1.03
 -19   6  18    0.43    1.09
  19  -6 -18   -1.03    1.21
 -19   6  19    5.57    1.73
 -19   6  19    5.08    1.76
 -19   6  20    0.97    1.11
 -19   6  20    1.31    1.19
  19  -6 -20    1.35    1.41
 -19   7   1   48.82    4.23
 -19   7   1   54.29    4.82
 -19   7   1   43.37    4.24
 -19   7   1   37.26    3.89
  19  -7  -1   51.64    4.51
 -19   7   2  116.54    7.61
 -19   7   2  119.15    8.26
 -19   7   2  100.80    7.71
 -19   7   2   91.92    7.19
  19  -7  -2  125.58    8.14
 -19   7   3   50.03    4.34
 -19   7   3   51.92    4.84
 -19   7   3   41.01    4.05
  19  -7  -3   50.37    4.54
  19  -7  -3   51.63    4.56
 -19   7   4   37.29    3.60
 -19   7   4   43.73    4.25
 -19   7   4   30.11    3.45
 -19   7   4   30.15    3.29
  19  -7  -4   35.92    3.63
  19  -7  -4   39.29    3.85
 -19   7   5   10.35    1.93
 -19   7   5   12.52    2.34
 -19   7   5    9.93    1.89
 -19   7   5    9.03    1.73
  19  -7  -5   11.32    2.13
  19  -7  -5   12.81    2.02
  19  -7  -5   12.29    1.98
 -19   7   6    2.83    1.17
 -19   7   6    4.97    1.50
 -19   7   6    2.54    1.09
  19  -7  -6    3.88    1.36
  19  -7  -6    1.64    1.14
  19  -7  -6    2.33    1.13
 -19   7   7   24.14    2.88
 -19   7   7   23.67    3.16
 -19   7   7   19.25    2.54
 -19   7   7   20.14    2.69
  19  -7  -7   22.67    2.92
  19  -7  -7   26.64    2.83
  19  -7  -7   24.32    2.87
 -19   7   8    4.15    1.31
 -19   7   8    4.61    1.51
 -19   7   8    2.27    1.15
  19  -7  -8    4.63    1.52
  19  -7  -8    3.54    1.19
  19  -7  -8    3.41    1.21
 -19   7   9    6.81    1.60
 -19   7   9    5.38    1.70
 -19   7   9    3.01    1.37
  19  -7  -9    7.57    1.74
  19  -7  -9    7.30    1.42
  19  -7  -9    6.62    1.49
 -19   7  10   62.99    5.54
 -19   7  10   55.86    5.07
  19  -7 -10   68.45    5.41
  19  -7 -10   69.74    5.54
  19  -7 -10   68.18    5.61
 -19   7  11   68.17    5.70
 -19   7  11   55.07    4.98
 -19   7  11   55.22    5.02
  19  -7 -11   66.72    5.36
  19  -7 -11   72.97    5.70
  19  -7 -11   75.98    5.93
 -19   7  12  103.81    7.42
 -19   7  12  109.10    7.80
 -19   7  12   87.98    7.02
 -19   7  12   83.66    6.88
  19  -7 -12  121.45    7.88
  19  -7 -12  120.72    8.43
  19  -7 -12  116.86    8.33
 -19   7  13  170.15   10.63
 -19   7  13  175.41   10.98
 -19   7  13  134.72    9.86
 -19   7  13  139.84   10.09
  19  -7 -13  171.70   10.45
  19  -7 -13  199.05   12.82
  19  -7 -13  198.56   12.85
 -19   7  14    3.08    1.36
 -19   7  14    2.64    1.34
 -19   7  14    2.37    1.14
 -19   7  14    1.67    1.13
  19  -7 -14    3.47    1.45
  19  -7 -14    4.04    1.30
 -19   7  15  190.68   12.07
 -19   7  15  187.89   11.96
  19  -7 -15  230.90   13.14
  19  -7 -15  231.49   14.89
  19  -7 -15  243.88   15.47
 -19   7  16    1.34    1.09
 -19   7  16    0.99    1.06
  19  -7 -16    0.69    1.22
 -19   7  17  135.69    9.32
 -19   7  18    2.51    1.30
 -19   7  18    1.77    1.32
  19  -7 -18    2.36    1.44
 -19   7  19  146.66    9.99
  19  -7 -19  200.75   11.77
 -19   7  20   12.68    2.55
  19  -7 -20   21.22    2.82
 -19   8   1  232.59   13.16
 -19   8   1  235.56   13.94
 -19   8   1  216.55   14.37
 -19   8   1  218.51   14.27
  19  -8  -1  216.03   12.80
  19  -8  -1  283.17   17.52
  19  -8  -1  258.09   16.36
 -19   8   2  112.22    7.48
 -19   8   2  109.04    7.94
 -19   8   2   97.22    7.62
 -19   8   2  103.19    7.68
  19  -8  -2  107.23    7.51
  19  -8  -2  127.96    8.92
  19  -8  -2  118.19    8.56
 -19   8   3   63.83    5.14
 -19   8   3   63.65    5.53
 -19   8   3   62.39    5.42
 -19   8   3   55.70    4.98
  19  -8  -3   61.78    5.24
  19  -8  -3   86.75    6.40
  19  -8  -3   74.57    5.96
 -19   8   4  239.52   13.53
 -19   8   4  227.28   13.66
 -19   8   4  220.38   14.60
 -19   8   4  205.28   13.71
  19  -8  -4  259.36   14.41
  19  -8  -4  283.37   17.44
  19  -8  -4  271.29   17.03
 -19   8   5   25.57    3.09
 -19   8   5   28.71    3.50
 -19   8   5   27.30    3.21
 -19   8   5   24.48    2.93
  19  -8  -5   29.92    3.33
  19  -8  -5   34.79    3.44
  19  -8  -5   32.75    3.44
 -19   8   6  304.33   16.63
 -19   8   6  318.05   17.65
 -19   8   6  277.99   17.89
 -19   8   6  250.40   16.72
  19  -8  -6  335.75   17.84
  19  -8  -6  368.67   22.11
  19  -8  -6  357.46   21.75
 -19   8   7    1.22    1.41
 -19   8   7    2.37    0.97
  19  -8  -7    1.57    1.19
  19  -8  -7    3.33    1.13
  19  -8  -7    2.57    1.15
 -19   8   8  455.18   23.98
 -19   8   8  366.16   23.23
  19  -8  -8  463.23   23.78
  19  -8  -8  504.14   29.79
  19  -8  -8  511.76   30.32
 -19   8   9    3.31    1.36
 -19   8   9    5.36    1.53
 -19   8   9    2.12    1.02
  19  -8  -9    4.60    1.44
  19  -8  -9    3.23    1.20
  19  -8  -9    2.42    1.22
 -19   8  10  191.84   11.74
 -19   8  10  221.00   13.06
 -19   8  10  180.62   12.36
 -19   8  10  172.40   12.11
  19  -8 -10  236.53   13.19
  19  -8 -10  253.17   15.71
  19  -8 -10  236.52   15.10
 -19   8  11   57.07    4.89
 -19   8  11   62.07    5.25
 -19   8  11   41.44    4.26
 -19   8  11   39.48    4.27
  19  -8 -11   60.18    4.88
  19  -8 -11   61.56    5.04
  19  -8 -11   61.38    5.22
 -19   8  12   42.40    4.39
 -19   8  12   45.21    4.57
  19  -8 -12   52.18    4.55
  19  -8 -12   50.44    4.56
  19  -8 -12   50.90    4.76
 -19   8  13   60.26    5.13
 -19   8  13   58.58    5.16
 -19   8  13   41.06    4.29
 -19   8  13   39.44    4.27
  19  -8 -13   62.30    4.98
  19  -8 -13   61.01    5.12
  19  -8 -13   58.29    5.06
 -19   8  14   12.52    2.27
 -19   8  14   12.73    2.30
 -19   8  14    7.50    1.84
 -19   8  14    7.26    1.90
  19  -8 -14   14.67    2.19
  19  -8 -14   13.66    2.12
  19  -8 -14   12.49    2.19
 -19   8  15   16.19    2.53
 -19   8  15   14.32    2.54
  19  -8 -15   16.30    2.41
  19  -8 -15   14.42    2.39
  19  -8 -15   11.81    2.35
 -19   8  16   21.24    2.97
 -19   8  16   17.24    2.82
 -19   8  17    1.34    1.09
 -19   8  17    0.74    1.20
  19  -8 -17    1.34    1.15
 -19   8  18    1.52    1.08
  19  -8 -18    1.05    1.35
 -19   8  19    0.47    1.15
  19  -8 -19    2.77    1.46
 -19   9   1  132.49    8.88
 -19   9   1  105.23    8.18
  19  -9  -1  118.79    8.04
  19  -9  -1  124.10    9.03
 -19   9   2  117.31    8.12
 -19   9   2   96.40    7.62
 -19   9   2   95.74    7.36
  19  -9  -2  109.83    7.54
  19  -9  -2  117.68    8.59
  19  -9  -2  111.30    8.25
 -19   9   3  159.46   10.18
 -19   9   3  133.32    9.74
 -19   9   3  130.75    9.40
  19  -9  -3  152.80    9.58
  19  -9  -3  166.67   11.15
  19  -9  -3  161.54   11.03
 -19   9   4   46.80    4.40
 -19   9   4   31.01    3.66
 -19   9   4   32.22    3.50
  19  -9  -4   43.57    4.03
  19  -9  -4   39.91    3.96
  19  -9  -4   43.30    4.12
 -19   9   5   24.97    3.27
 -19   9   5   23.19    2.99
 -19   9   5   20.93    2.71
  19  -9  -5   25.37    3.03
  19  -9  -5   28.42    3.16
  19  -9  -5   25.17    3.08
 -19   9   6   26.20    3.06
 -19   9   6   28.18    3.38
  19  -9  -6   27.45    3.14
  19  -9  -6   21.86    2.89
  19  -9  -6   21.74    2.96
 -19   9   7   16.97    2.58
 -19   9   7   19.76    2.94
 -19   9   7   17.13    2.60
  19  -9  -7   19.35    2.70
  19  -9  -7   23.15    2.73
  19  -9  -7   22.37    2.81
 -19   9   8    0.64    0.95
 -19   9   8    2.41    1.30
 -19   9   8    0.35    0.78
 -19   9   8    0.87    1.02
  19  -9  -8    2.73    1.17
  19  -9  -8    2.18    1.08
  19  -9  -8    1.61    1.13
 -19   9   9   11.01    2.01
 -19   9   9    9.36    2.17
 -19   9   9    8.19    1.72
 -19   9   9    7.82    1.88
  19  -9  -9   11.29    1.98
  19  -9  -9   11.38    1.90
  19  -9  -9   10.29    2.04
 -19   9  10  106.03    7.62
 -19   9  10  118.34    8.25
 -19   9  10  108.85    8.13
 -19   9  10  110.98    8.32
  19  -9 -10  102.90    7.36
  19  -9 -10  137.67    9.37
  19  -9 -10  140.13    9.69
 -19   9  11   35.95    3.85
 -19   9  11   38.73    4.08
 -19   9  11   32.05    3.60
 -19   9  11   32.96    3.73
  19  -9 -11   44.36    4.00
  19  -9 -11   41.89    3.97
  19  -9 -11   39.67    4.05
 -19   9  12   34.79    3.90
 -19   9  12   39.46    4.12
 -19   9  12   31.51    3.61
 -19   9  12   33.58    3.75
  19  -9 -12   40.59    3.90
  19  -9 -12   42.63    4.04
  19  -9 -12   45.53    4.27
 -19   9  13   89.28    6.84
 -19   9  13   88.83    6.83
 -19   9  13   76.56    6.43
 -19   9  13   77.78    6.51
  19  -9 -13  100.09    6.91
  19  -9 -13  107.59    7.87
 -19   9  14   34.69    3.88
 -19   9  14   28.02    3.58
  19  -9 -14   40.18    3.98
  19  -9 -14   43.83    4.21
 -19   9  15   91.34    7.11
 -19   9  15   90.55    7.07
  19  -9 -15  100.17    7.11
  19  -9 -15  111.62    8.24
  19  -9 -15  109.78    8.15
 -19   9  16   27.15    3.46
  19  -9 -16   33.04    3.60
 -19   9  17  106.18    7.86
  19  -9 -17  138.99    8.83
 -19   9  18    3.29    1.53
  19  -9 -18    3.44    1.53
 -19   9  19  155.84   10.28
  19  -9 -19  185.06   11.09
 -19  10   1   59.94    5.45
 -19  10   1   57.87    5.35
 -19  10   1   65.10    5.43
  19 -10  -1   63.11    5.27
  19 -10  -1   84.57    6.40
  19 -10  -1   67.78    5.74
 -19  10   2    9.70    1.93
 -19  10   2    9.23    2.10
 -19  10   2    9.40    1.99
 -19  10   2    8.68    1.84
  19 -10  -2   10.19    2.01
  19 -10  -2   13.93    2.19
  19 -10  -2   12.37    2.06
 -19  10   3  108.94    7.45
 -19  10   3  104.94    7.71
 -19  10   3  103.14    7.96
 -19  10   3   97.37    7.46
  19 -10  -3  106.84    7.45
  19 -10  -3  137.32    9.38
  19 -10  -3  123.21    8.87
 -19  10   4  166.28   10.39
 -19  10   4  183.55   11.41
 -19  10   4  161.63   11.41
  19 -10  -4  182.50   10.96
  19 -10  -4  209.85   13.52
  19 -10  -4  206.69   13.51
 -19  10   5  196.94   11.58
 -19  10   5  197.28   12.00
 -19  10   5  174.07   12.06
  19 -10  -5  180.05   11.01
  19 -10  -5  211.42   13.82
 -19  10   6  268.97   15.14
 -19  10   6  290.88   16.35
 -19  10   6  244.96   16.20
  19 -10  -6  296.59   16.10
  19 -10  -6  309.34   19.28
 -19  10   7   41.77    4.12
 -19  10   7   44.19    4.46
 -19  10   7   39.40    4.12
  19 -10  -7   43.30    4.13
  19 -10  -7   54.90    4.81
 -19  10   8  358.28   19.34
 -19  10   8  360.98   19.72
 -19  10   8  336.44   21.27
  19 -10  -8  385.63   20.21
  19 -10  -8  435.89   26.20
 -19  10   9    6.90    1.78
 -19  10   9    9.21    2.00
 -19  10   9    7.84    1.92
  19 -10  -9    9.25    1.89
  19 -10  -9   11.56    2.12
 -19  10  10  225.79   13.26
 -19  10  10  233.28   13.75
 -19  10  10  198.06   13.55
 -19  10  10  197.50   13.54
  19 -10 -10  256.96   14.19
  19 -10 -10  269.58   16.80
  19 -10 -10  262.19   16.65
 -19  10  11   28.17    3.33
 -19  10  11   28.29    3.43
 -19  10  11   18.99    2.81
 -19  10  11   21.22    2.97
  19 -10 -11   30.30    3.21
  19 -10 -11   30.22    3.22
  19 -10 -11   29.16    3.31
 -19  10  12   94.23    7.00
 -19  10  12   81.58    6.72
 -19  10  12   77.85    6.62
  19 -10 -12  109.36    7.91
  19 -10 -12  112.85    8.19
 -19  10  13   32.45    3.74
 -19  10  13   32.91    3.85
  19 -10 -13   45.83    4.12
  19 -10 -13   48.82    4.38
 -19  10  14   75.90    6.16
 -19  10  14   73.90    6.05
 -19  10  14   59.24    5.59
  19 -10 -14   77.85    5.87
  19 -10 -14   86.56    6.70
  19 -10 -14   84.99    6.73
 -19  10  15    9.01    2.02
  19 -10 -15    9.70    1.93
  19 -10 -15    7.95    1.94
  19 -10 -15    5.65    1.98
 -19  10  16   18.22    2.77
 -19  10  17    0.34    1.00
  19 -10 -17    1.36    1.29
  19 -10 -18    2.25    1.42
 -19  11   1  411.48   21.81
 -19  11   1  353.67   22.25
 -19  11   1  332.27   20.96
  19 -11  -1  382.53   20.22
  19 -11  -1  420.14   25.40
  19 -11  -1  407.41   24.90
 -19  11   2   44.51    4.44
 -19  11   2   39.26    4.00
  19 -11  -2   43.65    4.16
  19 -11  -2   46.34    4.40
  19 -11  -2   44.10    4.40
 -19  11   3  253.49   14.23
 -19  11   3  266.71   15.15
 -19  11   3  215.92   14.33
  19 -11  -3  245.02   13.92
  19 -11  -3  268.74   16.96
 -19  11   4   33.06    3.45
 -19  11   4   33.55    3.76
 -19  11   4   24.62    3.32
 -19  11   4   27.69    3.20
  19 -11  -4   33.59    3.51
  19 -11  -4   35.35    3.66
 -19  11   5    0.95    0.99
 -19  11   5    3.21    1.41
 -19  11   5    1.83    1.14
 -19  11   5    3.16    1.02
  19 -11  -5    2.68    1.20
  19 -11  -5    0.22    1.22
  19 -11  -5    1.27    1.21
 -19  11   6   14.88    2.47
 -19  11   6   19.23    2.83
  19 -11  -6   19.00    2.59
  19 -11  -6   18.06    2.63
  19 -11  -6   17.74    2.68
 -19  11   7    8.70    1.94
 -19  11   7   11.06    2.27
 -19  11   7   10.14    2.03
 -19  11   7    9.65    1.85
  19 -11  -7    9.84    2.01
  19 -11  -7   11.97    2.11
  19 -11  -7   12.40    2.18
 -19  11   8   12.63    2.20
 -19  11   8   11.74    2.40
 -19  11   8   13.27    2.08
 -19  11   8   10.67    2.24
  19 -11  -8   10.98    2.15
  19 -11  -8   17.06    2.38
  19 -11  -8   18.43    2.60
 -19  11   9   22.70    2.88
 -19  11   9   20.40    2.97
 -19  11   9   18.05    2.60
  19 -11  -9   20.60    2.76
  19 -11  -9   21.04    2.75
 -19  11  10   56.55    5.14
 -19  11  10   54.92    5.06
  19 -11 -10   81.04    6.14
 -19  11  11    4.72    1.48
 -19  11  11    4.03    1.46
 -19  11  11    2.49    1.18
 -19  11  11    2.81    1.47
  19 -11 -11    2.82    1.42
  19 -11 -11    4.87    1.40
  19 -11 -11    3.89    1.56
 -19  11  12   47.72    4.68
 -19  11  12   50.91    4.77
 -19  11  12   45.07    4.51
 -19  11  12   45.56    4.64
  19 -11 -12   59.02    4.82
  19 -11 -12   63.47    5.27
  19 -11 -12   59.22    5.25
 -19  11  13   17.33    2.59
 -19  11  13   11.18    2.19
 -19  11  13   10.34    2.28
  19 -11 -13   17.09    2.44
  19 -11 -13   17.32    2.45
  19 -11 -13   18.72    2.58
 -19  11  14  129.36    8.85
 -19  11  14  115.33    8.85
 -19  11  14  121.93    9.20
  19 -11 -14  147.37    9.20
  19 -11 -14  156.20   10.69
  19 -11 -14  148.62   10.38
 -19  11  15   62.59    5.61
  19 -11 -15   75.10    5.82
  19 -11 -15   78.04    6.41
  19 -11 -15   77.65    6.41
 -19  11  16  117.76    8.32
  19 -11 -16  139.41    8.93
 -19  12   1   78.65    6.37
 -19  12   1   73.79    6.33
 -19  12   1   79.17    6.32
  19 -12  -1   72.41    5.85
  19 -12  -1  109.18    7.81
  19 -12  -1   90.03    7.05
 -19  12   2   -0.25    0.92
 -19  12   2    0.83    1.00
 -19  12   2    1.08    0.99
  19 -12  -2   -0.38    0.99
  19 -12  -2    0.56    1.08
  19 -12  -2    0.81    0.98
 -19  12   3  306.84   16.90
 -19  12   3  320.52   17.78
 -19  12   3  292.12   18.79
 -19  12   3  280.30   17.98
  19 -12  -3  327.08   17.58
  19 -12  -3  373.77   22.61
  19 -12  -3  342.67   21.25
 -19  12   4   26.80    3.12
 -19  12   4   25.07    3.28
 -19  12   4   23.36    3.11
 -19  12   4   25.66    2.97
  19 -12  -4   28.11    3.18
 -19  12   5  362.58   19.48
 -19  12   5  376.16   20.29
 -19  12   5  329.39   20.99
 -19  12   5  330.55   20.89
  19 -12  -5  384.89   20.18
  19 -12  -5  432.73   25.94
  19 -12  -5  417.02   25.31
 -19  12   6  111.38    7.64
 -19  12   6  106.99    7.71
 -19  12   6   92.76    7.56
 -19  12   6   92.90    7.33
  19 -12  -6  113.28    7.61
  19 -12  -6  127.16    8.92
  19 -12  -6  114.16    8.48
 -19  12   7  184.28   11.24
 -19  12   7  191.99   11.77
 -19  12   7  167.50   11.80
 -19  12   7  172.35   11.98
  19 -12  -7  175.09   10.77
  19 -12  -7  217.87   13.98
  19 -12  -7  216.84   14.14
 -19  12   8  282.26   16.17
 -19  12   8  263.18   17.29
  19 -12  -8  344.37   20.99
  19 -12  -8  332.97   20.68
 -19  12   9   70.17    5.90
 -19  12   9   87.02    6.62
 -19  12   9   75.14    6.25
 -19  12   9   73.71    6.30
  19 -12  -9   71.25    5.76
  19 -12  -9   97.97    7.19
  19 -12  -9   94.69    7.21
 -19  12  10  211.03   12.65
 -19  12  10  210.19   12.61
 -19  12  10  168.48   12.06
 -19  12  10  182.67   12.72
  19 -12 -10  241.67   13.41
  19 -12 -10  248.66   15.69
  19 -12 -10  247.63   15.80
 -19  12  11    9.25    2.09
 -19  12  11    8.57    1.85
 -19  12  11    8.07    2.02
  19 -12 -11   10.80    2.02
  19 -12 -11   13.55    2.11
  19 -12 -11   11.83    2.18
 -19  12  12  199.52   12.15
 -19  12  12  168.10   11.96
 -19  12  12  178.00   12.47
  19 -12 -12  225.83   12.74
  19 -12 -12  229.26   14.74
  19 -12 -12  230.10   14.90
 -19  12  13    1.67    1.18
 -19  12  13    1.87    1.36
  19 -12 -13    4.21    1.34
  19 -12 -13    2.99    1.46
 -19  12  14  124.55    8.70
  19 -12 -14  141.58    9.04
  19 -12 -14  141.36   10.04
  19 -12 -14  138.17    9.94
  19 -12 -15    1.29    1.14
  19 -12 -15    1.27    1.27
  19 -12 -15    0.62    1.38
 -19  13   1  344.86   18.80
 -19  13   1  289.56   18.77
 -19  13   1  287.92   18.45
  19 -13  -1  351.84   18.60
  19 -13  -1  347.40   21.56
  19 -13  -1  343.15   21.37
 -19  13   2   18.90    2.80
 -19  13   2   13.95    2.49
 -19  13   2   16.03    2.39
  19 -13  -2   16.97    2.54
  19 -13  -2   20.83    2.74
  19 -13  -2   19.52    2.73
 -19  13   3  185.75   11.35
 -19  13   3  140.38   10.36
 -19  13   3  149.12   10.50
  19 -13  -3  186.28   10.93
  19 -13  -3  164.07   11.30
  19 -13  -3  175.61   11.98
 -19  13   4    0.28    0.89
 -19  13   4   -0.02    0.90
 -19  13   4    0.57    0.96
 -19  13   4    0.62    0.78
  19 -13  -4   -0.46    0.91
  19 -13  -4    0.72    1.06
  19 -13  -4    0.93    1.01
 -19  13   5   31.89    3.41
  19 -13  -5   24.12    3.18
  19 -13  -5   27.85    3.40
 -19  13   6    2.67    1.11
 -19  13   6    0.86    1.10
 -19  13   6    1.21    1.18
 -19  13   6    1.09    0.95
  19 -13  -6    2.11    1.38
  19 -13  -6    0.85    1.20
 -19  13   7   21.22    2.82
 -19  13   7   23.86    3.04
  19 -13  -7   21.63    2.95
  19 -13  -7   17.44    2.68
  19 -13  -7   17.95    2.81
 -19  13   8   20.30    2.96
 -19  13   8   20.96    2.99
  19 -13  -8   20.65    2.80
  19 -13  -8   29.07    3.25
  19 -13  -8   25.58    3.16
 -19  13   9   -0.32    0.95
 -19  13   9    0.74    0.84
 -19  13   9    0.14    1.11
  19 -13  -9    0.61    0.97
  19 -13  -9    1.51    1.13
  19 -13  -9    1.13    1.11
 -19  13  10   42.84    4.38
 -19  13  10   43.50    4.46
  19 -13 -10   45.98    4.27
  19 -13 -10   57.22    5.07
 -19  13  11    3.18    1.37
 -19  13  11    3.21    1.25
 -19  13  11    2.68    1.59
  19 -13 -11    2.48    1.35
  19 -13 -11    5.14    1.48
  19 -13 -11    5.22    1.58
 -19  13  12   67.91    5.76
 -19  13  12   61.20    5.61
 -19  13  12   65.51    5.86
  19 -13 -12   76.63    5.82
  19 -13 -12   86.27    6.64
  19 -13 -12   84.34    6.68
 -19  13  13    3.47    1.51
 -19  13  13    5.07    1.48
  19 -13 -13    5.80    1.67
  19 -13 -13    5.51    1.64
  19 -13 -14  231.13   15.12
  19 -13 -14  220.94   14.74
 -19  14   1   55.14    5.34
 -19  14   1   63.34    5.43
  19 -14  -1   80.86    6.35
  19 -14  -1   72.44    6.08
 -19  14   2    1.96    1.40
 -19  14   2    0.60    1.21
 -19  14   2    2.55    1.15
  19 -14  -2    4.13    1.48
  19 -14  -2    1.22    1.09
 -19  14   3  264.52   15.22
 -19  14   3  251.11   16.52
 -19  14   3  242.45   15.84
  19 -14  -3  275.17   15.22
  19 -14  -3  303.84   18.91
  19 -14  -3  293.04   18.57
 -19  14   4    5.42    1.63
 -19  14   4    5.84    1.71
 -19  14   4    4.45    1.70
 -19  14   4    6.30    1.51
  19 -14  -4    5.87    1.64
  19 -14  -4    8.36    1.79
  19 -14  -4    7.11    1.77
 -19  14   5  240.86   13.98
 -19  14   5  248.70   14.45
 -19  14   5  211.45   14.48
 -19  14   5  223.87   14.80
  19 -14  -5  257.81   14.36
  19 -14  -5  287.21   17.95
  19 -14  -5  275.56   17.58
 -19  14   6    4.61    1.54
 -19  14   6    5.40    1.76
 -19  14   6    4.98    1.71
 -19  14   6    4.56    1.41
  19 -14  -6    7.58    1.68
  19 -14  -6    7.22    1.76
  19 -14  -6    6.28    1.79
 -19  14   7  245.90   14.24
 -19  14   7  222.16   14.94
 -19  14   7  216.99   14.67
  19 -14  -7  263.38   14.54
  19 -14  -7  269.18   16.98
  19 -14  -7  250.61   16.28
 -19  14   8   73.63    5.95
 -19  14   8   61.69    5.75
 -19  14   8   61.71    5.65
  19 -14  -8   80.41    5.92
  19 -14  -8   85.63    6.62
  19 -14  -8   77.67    6.40
 -19  14   9   99.89    8.00
 -19  14   9  103.38    8.16
  19 -14  -9  122.06    7.98
  19 -14  -9  132.42    9.29
  19 -14  -9  123.32    9.02
 -19  14  10  115.31    8.05
 -19  14  10   91.81    7.53
  19 -14 -10  126.03    8.13
  19 -14 -10  137.13    9.49
 -19  14  11   63.58    5.43
 -19  14  11   53.02    5.06
 -19  14  11   55.97    5.39
  19 -14 -11   72.43    5.51
  19 -14 -11   69.10    5.72
  19 -14 -11   67.90    5.82
 -19  14  12  112.95    8.67
 -19  14  12  111.51    8.68
  19 -14 -12  153.09   10.41
  19 -14 -12  151.61   10.48
 -19  14  13   25.91    3.25
 -19  14  13   25.62    3.41
  19 -14 -13   32.65    3.56
  19 -14 -13   34.11    3.73
  19 -14 -14   86.98    6.90
  19 -14 -14   77.34    6.56
 -19  15   1  114.29    8.01
 -19  15   1   96.29    7.70
 -19  15   1   93.21    7.30
  19 -15  -1  108.10    7.40
  19 -15  -1  109.07    8.20
  19 -15  -1  112.07    8.41
 -19  15   2   95.47    6.94
 -19  15   2   77.85    6.69
 -19  15   2   76.18    6.27
  19 -15  -2   82.98    6.25
  19 -15  -2   92.97    7.15
  19 -15  -2   88.52    7.08
 -19  15   3   22.86    3.04
 -19  15   3   17.39    2.50
  19 -15  -3   24.71    2.89
  19 -15  -3   19.39    2.77
  19 -15  -3   18.34    2.86
 -19  15   4   28.41    3.41
 -19  15   4   22.24    2.88
  19 -15  -4   30.24    3.23
  19 -15  -4   26.73    3.29
  19 -15  -4   24.82    3.33
 -19  15   5    9.57    1.99
 -19  15   5    8.91    1.69
  19 -15  -5    9.31    1.88
  19 -15  -5    5.71    1.90
  19 -15  -5    5.67    1.97
 -19  15   6   15.14    2.53
  19 -15  -6   16.36    2.47
  19 -15  -6   17.95    2.64
  19 -15  -6   17.90    2.73
 -19  15   7   16.32    2.52
  19 -15  -7   16.61    2.42
  19 -15  -7   12.13    2.30
  19 -15  -7   13.85    2.47
 -19  15   8   12.48    2.28
 -19  15   8   11.68    2.30
 -19  15   8   10.98    2.03
  19 -15  -8   13.64    2.29
  19 -15  -8   12.10    2.25
 -19  15   9    3.14    1.44
 -19  15   9    4.45    1.40
 -19  15   9    3.23    1.59
  19 -15  -9    3.72    1.50
  19 -15  -9    6.22    1.68
  19 -15  -9    7.12    1.75
 -19  15  10    3.93    1.37
 -19  15  10    3.72    1.58
  19 -15 -10    4.84    1.54
  19 -15 -10    4.83    1.66
 -19  15  11   18.01    2.68
 -19  15  11   18.49    2.89
  19 -15 -11   24.39    2.99
  19 -15 -11   26.25    3.16
 -19  15  12   27.00    3.33
 -19  15  12   23.24    3.33
  19 -15 -12   40.39    3.86
  19 -15 -12   32.38    3.63
  19 -15 -13    9.85    2.02
  19 -15 -13    8.30    2.07
 -19  16   1   22.53    3.13
 -19  16   1   18.90    3.01
 -19  16   1   22.38    2.87
  19 -16  -1   26.65    3.08
  19 -16  -1   30.51    3.44
  19 -16  -1   26.96    3.24
 -19  16   2   55.56    5.01
 -19  16   2   43.64    4.66
 -19  16   2   48.57    4.56
  19 -16  -2   50.89    4.57
  19 -16  -2   61.04    5.24
  19 -16  -2   52.89    5.00
 -19  16   3  166.35   10.45
 -19  16   3  141.95   10.41
 -19  16   3  140.71   10.03
  19 -16  -3  149.74    9.53
  19 -16  -3  177.44   11.87
  19 -16  -3  168.75   11.65
 -19  16   4   49.76    4.81
 -19  16   4   51.66    5.01
 -19  16   4   51.86    4.72
  19 -16  -4   53.93    4.72
  19 -16  -4   59.77    5.22
  19 -16  -4   63.86    5.57
 -19  16   5  109.91    7.87
 -19  16   5  110.81    8.55
 -19  16   5  109.26    8.20
  19 -16  -5  124.15    8.13
  19 -16  -5  140.78    9.77
  19 -16  -5  123.70    9.15
 -19  16   6    0.06    0.97
 -19  16   6    0.19    1.11
 -19  16   6    1.79    0.93
  19 -16  -6    0.89    1.01
  19 -16  -6   -0.23    1.19
  19 -16  -6    2.08    1.24
 -19  16   7  145.02    9.47
 -19  16   7  127.46    9.58
 -19  16   7  132.13    9.66
  19 -16  -7  143.06    9.11
  19 -16  -7  156.83   10.76
  19 -16  -7  160.35   11.08
 -19  16   8    3.35    1.52
 -19  16   8    3.66    1.27
  19 -16  -8    4.89    1.62
  19 -16  -8    4.20    1.54
 -19  16   9  184.94   13.17
 -19  16   9  195.73   13.32
  19 -16  -9  228.25   14.86
 -19  16  10   20.55    3.11
  19 -16 -10   29.29    3.29
  19 -16 -10   25.62    3.25
 -19  16  11  102.16    8.11
  19 -16 -11  131.86    9.33
  19 -16 -11  124.94    9.13
 -19  16  12   20.22    2.85
  19 -16 -12   24.38    3.01
  19 -16 -13   71.48    6.04
  19 -16 -13   70.17    6.08
 -19  17   1   18.07    2.69
 -19  17   1   13.53    2.52
  19 -17  -1   15.19    2.42
  19 -17  -1   13.57    2.45
  19 -17  -1   14.53    2.51
 -19  17   2   47.50    4.57
 -19  17   2   37.77    4.32
  19 -17  -2   50.89    4.45
  19 -17  -2   48.90    4.74
 -19  17   3    1.87    1.43
 -19  17   3    2.38    1.22
  19 -17  -3    1.78    1.21
  19 -17  -3    2.17    1.27
 -19  17   4   25.47    3.23
 -19  17   4   20.28    3.09
  19 -17  -4   30.92    3.27
  19 -17  -4   27.96    3.45
 -19  17   5    4.81    1.75
  19 -17  -5    6.59    1.81
  19 -17  -5    7.29    1.86
  19 -17  -6   19.01    2.72
  19 -17  -6   15.95    2.58
 -19  17   7    6.78    1.59
  19 -17  -7    6.78    1.83
  19 -17  -7    5.45    1.77
 -19  17   8    2.57    1.14
  19 -17  -8    1.09    1.35
  19 -17  -8    2.25    1.21
 -19  17   9    2.23    1.24
  19 -17  -9    4.55    1.49
 -19  17  10    0.45    0.97
  19 -17 -10    0.53    1.13
  19 -17 -10    0.85    1.22
 -19  17  11   13.20    2.30
  19 -17 -11   14.87    2.40
  19 -17 -11   15.25    2.48
  19 -17 -12    9.76    2.23
 -19  18   1    8.60    1.96
 -19  18   1    7.78    1.69
  19 -18  -1    7.30    1.88
  19 -18  -1    5.49    1.79
 -19  18   2   91.84    7.20
  19 -18  -2  116.27    8.44
 -19  18   3   49.11    4.62
  19 -18  -3   61.90    5.34
 -19  18   4   52.31    4.87
  19 -18  -4   71.14    5.82
 -19  18   5   75.91    6.32
  19 -18  -5   91.63    7.13
  19 -18  -5   91.74    7.30
 -19  18   6   19.56    2.71
  19 -18  -6   22.35    2.98
  19 -18  -6   23.01    3.04
  19 -18  -7  145.72   10.28
  19 -18  -7  143.16   10.32
  19 -18  -8    2.42    1.43
  19 -18  -8    2.29    1.30
 -19  18   9  135.73   10.31
  19 -18  -9  153.59   10.69
  19 -18  -9  154.54   10.86
 -19  18  10    2.71    1.18
  19 -18 -10    1.12    1.34
  19 -18 -10    2.19    1.24
 -19  19   1    0.29    0.94
  19 -19  -1    0.67    1.16
  19 -19  -1    0.53    0.91
 -19  19   2  105.59    7.93
  19 -19  -2  116.44    8.58
  19 -19  -2  109.47    8.40
 -19  19   3    5.60    1.51
  19 -19  -3    8.37    1.83
  19 -19  -3    4.95    1.75
 -19  19   4   47.00    4.36
  19 -19  -4   44.20    4.44
  19 -19  -4   44.56    4.55
 -19  19   5   17.52    2.36
  19 -19  -5   14.80    2.48
  19 -19  -5   13.07    2.42
 -19  19   6    6.18    1.46
  19 -19  -6    3.23    1.60
  19 -19  -6    3.28    1.55
  19 -19  -7    6.21    1.79
 -19  19   8   -0.18    0.77
  19 -19  -8   -0.34    1.08
  19 -19  -8    0.42    1.10
 -19  19   9    0.30    0.86
 -19  20   1    5.16    1.48
  19 -20  -1    5.00    1.66
  19 -20  -1    5.97    1.68
 -19  20   2   73.72    6.14
  19 -20  -2   92.34    7.11
  19 -20  -2   82.16    6.82
 -19  20   3    7.12    1.63
  19 -20  -3    7.17    1.81
  19 -20  -3    8.31    1.92
 -19  20   4   49.98    4.68
  19 -20  -4   58.67    5.19
  19 -20  -4   58.26    5.30
 -19  20   5   18.19    2.50
  19 -20  -5   19.94    2.75
  19 -20  -5   16.05    2.66
 -19  20   6   25.97    3.16
  19 -20  -6   29.16    3.39
 -19  20   7   60.33    5.42
 -19  21   1    7.45    1.61
  19 -21  -1    7.81    1.86
 -19  21   2  100.38    7.60
  19 -21  -2  106.54    8.02
 -19  21   3    1.15    0.85
  19 -21  -3    0.35    1.10
 -19  21   4   63.38    5.37
  19 -21  -4   57.30    5.36
 -18 -16   4    2.24    1.81
  18  16  -4    2.42    1.62
 -18 -16   5    9.37    2.52
  18  16  -5   11.99    2.62
 -18 -16   6   13.23    2.85
  18  16  -6   13.86    2.83
 -18 -16   7   39.40    4.68
 -18 -16   7   41.67    4.20
  18  16  -7   38.56    4.61
 -18 -16   8   57.68    5.14
  18  16  -8   56.66    5.66
 -18 -16   9   16.05    3.18
 -18 -16   9   16.40    2.64
  18  16  -9   15.90    3.08
 -18 -16  10   55.82    5.73
 -18 -16  10   58.60    5.15
 -18 -15   2    5.17    2.19
  18  15  -2    7.61    2.11
 -18 -15   3   95.24    7.60
  18  15  -3   90.89    7.42
 -18 -15   4    1.03    1.27
  18  15  -4   -0.25    1.14
  18  15  -5   64.88    6.04
 -18 -15   6    4.22    1.82
 -18 -15   6    3.82    1.55
 -18 -15   7   27.13    3.73
 -18 -15   7   25.84    3.25
  18  15  -7   26.41    3.77
 -18 -15   8    4.83    2.00
 -18 -15   8    5.73    1.73
 -18 -15   9   23.12    3.62
 -18 -15   9   21.59    2.94
  18  15  -9   15.43    3.07
 -18 -15  10   16.87    3.08
  18  15 -10   17.42    3.17
 -18 -15  11   16.99    3.19
 -18 -15  11   15.74    2.65
 -18 -14   1    2.04    1.61
  18  14  -1    1.54    1.47
 -18 -14   2    0.06    1.35
  18  14  -2    1.86    1.38
 -18 -14   3   15.75    2.92
  18  14  -3   17.00    3.00
 -18 -14   4    1.12    1.21
 -18 -14   4    0.25    1.11
  18  14  -4    2.23    1.50
 -18 -14   5   18.81    2.78
 -18 -14   6   14.11    2.73
 -18 -14   6   14.18    2.40
  18  14  -6   15.05    2.88
 -18 -14   7   31.87    3.99
 -18 -14   7   30.07    3.52
  18  14  -7   29.59    3.99
 -18 -14   8   12.06    2.58
 -18 -14   8   11.27    2.20
  18  14  -8   10.20    2.57
 -18 -14   9   35.74    4.22
  18  14  -9   33.22    4.21
 -18 -14  10   26.24    3.70
 -18 -14  10   26.98    3.33
  18  14 -10   22.99    3.57
  18  14 -10   26.53    3.37
 -18 -14  11   34.26    3.84
 -18 -14  12  168.95   11.36
 -18 -14  12  162.66   10.28
  18  14 -12  158.25   10.93
  18  14 -12  171.10   10.70
 -18 -13   1   85.77    6.91
  18  13  -1   77.82    6.70
 -18 -13   2   23.02    3.32
  18  13  -2   20.61    3.33
 -18 -13   3   67.88    6.05
 -18 -13   3   68.55    5.60
  18  13  -3   71.97    6.34
 -18 -13   4   11.35    2.52
 -18 -13   4   12.56    2.20
  18  13  -4   10.36    2.47
 -18 -13   5   71.91    6.23
 -18 -13   5   66.65    5.58
  18  13  -5   74.14    6.41
 -18 -13   6    0.87    1.18
 -18 -13   6    1.13    1.01
  18  13  -6   -0.80    1.22
 -18 -13   7   98.55    7.56
 -18 -13   7   90.15    6.77
  18  13  -7   99.13    7.72
 -18 -13   8    7.50    2.06
 -18 -13   8    7.24    1.90
  18  13  -8    8.73    2.39
 -18 -13   9   68.26    6.05
 -18 -13   9   60.63    5.30
  18  13  -9   66.90    6.13
  18  13  -9   72.16    5.84
 -18 -13  10   29.15    3.52
  18  13 -10   34.71    3.81
 -18 -13  11    9.81    2.43
 -18 -13  11   12.49    2.26
  18  13 -11    9.70    2.58
  18  13 -11   10.81    2.38
 -18 -13  12   15.97    2.82
 -18 -13  12   13.05    2.34
  18  13 -12   13.61    2.83
  18  13 -12   12.94    2.58
 -18 -13  13    0.16    1.33
 -18 -13  13    0.71    1.12
  18  13 -13    0.97    1.54
  18  13 -13    1.81    1.52
 -18 -13  14    0.61    1.57
 -18 -12   1    1.15    1.13
 -18 -12   1    0.67    0.94
  18  12  -1   -0.39    1.20
 -18 -12   2    8.85    1.95
 -18 -12   3    0.75    1.25
 -18 -12   3    1.80    1.06
  18  12  -3    1.91    1.51
 -18 -12   4    1.78    1.19
 -18 -12   4    0.48    0.91
  18  12  -4    0.46    1.44
 -18 -12   5   22.60    3.22
 -18 -12   5   22.12    2.91
  18  12  -5   20.48    3.28
 -18 -12   6   -0.04    1.14
 -18 -12   6    0.78    0.99
  18  12  -6    0.24    1.23
 -18 -12   7  110.09    8.17
 -18 -12   7  107.88    7.55
  18  12  -7  115.43    8.50
 -18 -12   8    5.00    1.86
 -18 -12   8    6.21    1.62
  18  12  -8    7.13    2.04
  18  12  -8    5.75    1.85
 -18 -12   9   97.35    7.08
  18  12  -9  113.43    7.82
 -18 -12  10   84.64    6.86
 -18 -12  10   78.21    6.14
  18  12 -10   88.59    7.18
  18  12 -10   88.49    6.65
 -18 -12  11   81.52    6.83
 -18 -12  11   83.13    6.42
  18  12 -11   97.53    7.59
  18  12 -11   97.52    7.04
 -18 -12  12  200.30   12.56
 -18 -12  12  183.82   11.31
  18  12 -12  198.58   12.61
  18  12 -12  212.00   12.42
 -18 -12  13   69.99    6.19
 -18 -12  13   67.86    5.56
  18  12 -13   73.30    6.43
 -18 -12  14  162.46   10.96
 -18 -12  14  149.99    9.79
  18  12 -14  189.15   12.04
  18  12 -14  183.28   11.09
 -18 -12  15    1.90    1.65
 -18 -12  15    2.49    1.38
 -18 -11   1   57.91    5.00
 -18 -11   2   96.02    7.35
 -18 -11   2   97.86    7.03
  18  11  -2   97.57    7.65
 -18 -11   3  101.69    7.70
 -18 -11   3  101.50    7.25
  18  11  -3  114.03    8.31
 -18 -11   4   58.09    5.31
 -18 -11   4   54.49    4.89
  18  11  -4   63.64    5.74
 -18 -11   5  239.45   14.33
  18  11  -5  257.55   15.26
 -18 -11   6    3.14    1.50
 -18 -11   6    3.92    1.44
  18  11  -6    3.52    1.69
 -18 -11   7  178.28   11.35
 -18 -11   7  148.96    9.78
  18  11  -7  163.76   10.80
  18  11  -7  154.36   10.08
 -18 -11   8    6.05    1.53
  18  11  -8    2.94    1.83
  18  11  -8    3.28    1.59
 -18 -11   9  110.65    7.99
 -18 -11   9   95.26    7.01
  18  11  -9  105.33    8.04
  18  11  -9  113.06    7.78
  18  11 -10   20.47    3.17
  18  11 -10   17.65    2.82
 -18 -11  11    9.03    2.12
 -18 -11  11    7.73    1.90
  18  11 -11    9.67    2.34
  18  11 -11   10.61    2.19
 -18 -11  12   15.98    2.72
 -18 -11  12   15.32    2.47
  18  11 -12   15.65    2.92
  18  11 -12   15.45    2.68
 -18 -11  13    5.86    1.88
  18  11 -13    7.91    2.21
 -18 -11  14    2.05    1.38
 -18 -11  14    0.84    1.30
  18  11 -14    1.22    1.52
  18  11 -14    3.20    1.74
 -18 -11  15    3.57    1.61
 -18 -11  15    2.87    1.40
  18  11 -15    3.59    1.79
 -18 -11  16   26.51    3.66
 -18 -11  16   19.88    3.08
 -18 -10   1    0.87    0.95
 -18 -10   1   -0.46    0.76
  18  10  -1   -0.47    1.16
 -18 -10   2    2.36    1.33
 -18 -10   2    1.69    1.25
  18  10  -2    2.78    1.52
 -18 -10   3   -0.18    0.78
 -18 -10   3   -0.94    0.81
  18  10  -3   -0.02    1.09
 -18 -10   4    0.23    0.90
  18  10  -4    0.66    1.28
 -18 -10   5   25.90    3.47
 -18 -10   5   29.57    3.34
  18  10  -5   35.67    4.01
 -18 -10   6    3.75    1.54
 -18 -10   6    4.77    1.49
  18  10  -6    6.61    2.00
  18  10  -6    4.91    1.62
 -18 -10   7   57.07    4.97
  18  10  -7   66.14    5.87
  18  10  -7   61.81    5.32
  18  10  -8   20.90    3.29
  18  10  -8   26.21    3.21
 -18 -10   9  201.75   12.47
 -18 -10   9  185.57   11.37
  18  10  -9  213.91   13.09
  18  10  -9  228.39   13.06
 -18 -10  10    8.78    2.13
 -18 -10  10    8.91    2.02
  18  10 -10   12.19    2.48
  18  10 -10   10.73    2.21
 -18 -10  11  264.27   15.47
 -18 -10  11  255.80   14.62
  18  10 -11  298.96   16.94
  18  10 -11  297.93   16.29
 -18 -10  12   71.37    6.02
 -18 -10  12   66.43    5.55
  18  10 -12   82.49    6.63
 -18 -10  13  158.63   10.59
 -18 -10  13  159.82   10.07
  18  10 -13  171.44   11.19
  18  10 -13  199.46   11.64
 -18 -10  14  142.33    9.72
 -18 -10  14  135.34    9.00
  18  10 -14  166.97   10.81
  18  10 -14  158.73   10.03
 -18 -10  15   49.00    4.96
 -18 -10  15   49.12    4.62
  18  10 -15   61.73    5.31
 -18 -10  16  296.42   17.01
 -18 -10  16  259.39   15.11
  18  10 -16  315.02   17.87
  18  10 -16  325.38   17.94
 -18  -9   1    6.58    1.75
 -18  -9   1    5.64    1.60
  18   9  -1    6.55    1.98
 -18  -9   2  256.47   14.87
 -18  -9   2  225.51   13.29
  18   9  -2  273.28   15.68
 -18  -9   3   42.51    4.32
  18   9  -3   38.74    4.37
 -18  -9   4  263.31   15.23
 -18  -9   4  244.83   14.08
  18   9  -4  283.01   16.17
 -18  -9   5  173.43   11.02
 -18  -9   5  168.11   10.36
  18   9  -5  173.11   10.82
 -18  -9   6  155.40   10.24
 -18  -9   6  149.10    9.44
  18   9  -6  152.88   10.26
  18   9  -6  161.33   10.06
 -18  -9   7  205.63   12.52
 -18  -9   7  185.41   11.32
  18   9  -7  221.43   13.32
  18   9  -7  219.16   12.75
 -18  -9   8   14.23    2.49
 -18  -9   8   11.35    2.19
  18   9  -8   14.46    2.71
  18   9  -8   19.54    2.64
  18   9  -9  188.59   11.88
  18   9  -9  187.55   11.38
 -18  -9  10   11.50    2.17
 -18  -9  10    8.78    2.01
  18   9 -10   13.99    2.58
  18   9 -10   11.01    2.22
 -18  -9  11   41.95    4.36
 -18  -9  11   45.26    4.25
  18   9 -11   48.00    4.71
  18   9 -11   44.32    4.43
 -18  -9  12    5.02    1.64
  18   9 -12    5.51    1.87
 -18  -9  13    4.03    1.46
 -18  -9  13    3.02    1.34
  18   9 -13    4.57    1.71
  18   9 -13    0.85    1.60
 -18  -9  14    0.71    1.09
 -18  -9  14    2.19    1.18
  18   9 -14    1.34    1.46
  18   9 -14   -0.62    1.42
 -18  -9  15    0.15    1.08
  18   9 -15    2.09    1.60
 -18  -9  16   22.23    3.20
 -18  -9  16   24.17    3.15
  18   9 -16   23.77    3.50
  18   9 -16   28.59    3.84
 -18  -9  17   27.51    3.49
 -18  -9  17   24.64    3.31
 -18  -8   1    2.97    1.30
 -18  -8   1    0.41    1.01
  18   8  -1    2.34    1.42
 -18  -8   2   30.84    3.52
 -18  -8   2   23.68    3.10
  18   8  -2   31.52    3.74
 -18  -8   3    0.84    0.91
 -18  -8   3    0.80    0.88
  18   8  -3    0.01    1.13
 -18  -8   4    2.35    1.25
 -18  -8   4    2.40    1.23
  18   8  -4    2.43    1.28
 -18  -8   5   16.24    2.60
 -18  -8   5   14.61    2.33
  18   8  -5   14.70    2.71
  18   8  -5   15.01    2.43
 -18  -8   6  103.62    7.60
 -18  -8   6  106.30    7.33
  18   8  -6  113.99    8.17
  18   8  -6  104.87    7.46
 -18  -8   7   44.78    4.44
 -18  -8   7   45.86    4.23
  18   8  -7   44.66    4.64
  18   8  -7   47.05    4.42
 -18  -8   8   47.23    4.60
 -18  -8   8   45.65    4.33
  18   8  -8   51.11    4.97
  18   8  -8   55.67    4.79
 -18  -8   9  193.28   11.89
 -18  -8   9  176.57   10.92
  18   8  -9  208.84   12.67
  18   8  -9  218.05   12.53
 -18  -8  10    5.61    1.61
 -18  -8  10    4.71    1.62
  18   8 -10    6.29    1.91
  18   8 -10    3.06    1.67
 -18  -8  11  308.71   17.42
  18   8 -11  360.51   19.57
 -18  -8  12    5.06    1.54
 -18  -8  12    4.26    1.41
  18   8 -12    5.11    1.85
  18   8 -12    3.26    1.69
 -18  -8  13  356.55   19.69
 -18  -8  13  356.14   19.23
  18   8 -13  411.63   21.98
  18   8 -13  431.92   22.25
 -18  -8  14   71.12    5.88
 -18  -8  14   60.18    5.23
  18   8 -14   81.62    6.50
  18   8 -14   80.94    6.20
 -18  -8  15  166.14   10.41
  18   8 -15  198.22   11.90
 -18  -8  16  280.99   16.31
 -18  -8  16  285.28   16.16
  18   8 -16  349.74   19.09
  18   8 -16  334.05   18.40
 -18  -8  17   63.92    5.63
 -18  -8  17   60.95    5.46
  18   8 -17   76.43    6.30
  18   8 -17   69.37    6.13
 -18  -8  18  171.30   10.82
 -18  -8  18  151.37   10.08
 -18  -7   1   52.21    4.80
 -18  -7   1   48.95    4.47
  18   7  -1   47.90    4.80
 -18  -7   2  269.42   15.34
 -18  -7   2  263.78   14.73
  18   7  -2  250.52   14.84
 -18  -7   3    0.33    1.03
 -18  -7   3    1.70    0.96
  18   7  -3    0.92    1.11
 -18  -7   4  434.97   23.19
 -18  -7   4  437.48   22.77
  18   7  -4  503.56   25.97
  18   7  -4  446.74   23.32
 -18  -7   5   82.35    6.33
 -18  -7   5   69.49    5.59
  18   7  -5   85.50    6.65
  18   7  -5   71.88    5.82
 -18  -7   6  266.49   15.17
 -18  -7   6  239.14   13.78
  18   7  -6  264.94   15.35
  18   7  -6  284.88   15.63
 -18  -7   7  128.86    8.71
 -18  -7   7  119.04    8.05
  18   7  -7  135.02    9.15
  18   7  -7  126.69    8.46
 -18  -7   8   94.81    7.19
 -18  -7   8  102.38    7.17
  18   7  -8  105.70    7.74
  18   7  -8  117.31    7.79
 -18  -7   9  117.60    8.20
 -18  -7   9  114.65    7.78
  18   7  -9  123.69    8.62
  18   7  -9  123.32    8.20
 -18  -7  10   10.03    2.05
 -18  -7  10    8.55    1.92
  18   7 -10   13.80    2.42
 -18  -7  11   24.29    3.15
  18   7 -11   27.38    3.51
 -18  -7  12    2.33    1.21
 -18  -7  12    1.73    1.22
  18   7 -12    2.37    1.59
  18   7 -12    3.39    1.55
 -18  -7  13    2.65    1.22
 -18  -7  13    1.58    1.21
  18   7 -13    3.25    1.60
  18   7 -13    1.01    1.57
 -18  -7  14    8.07    1.85
 -18  -7  14    6.73    1.78
  18   7 -14    8.25    2.19
  18   7 -14    7.04    2.19
 -18  -7  15    3.18    1.41
  18   7 -15    5.26    2.04
 -18  -7  16    3.83    1.49
  18   7 -16    6.37    2.02
  18   7 -16    5.37    2.11
 -18  -7  17   87.55    6.97
 -18  -7  17   97.39    7.26
  18   7 -17  120.60    8.38
  18   7 -17  115.86    8.34
 -18  -7  18   48.30    4.73
 -18  -7  18   43.53    4.64
  18   7 -18   56.50    5.28
  18   7 -18   63.03    5.67
 -18  -6   1   22.68    3.00
 -18  -6   1   18.49    2.69
  18   6  -1   23.98    3.19
 -18  -6   2    4.63    1.54
 -18  -6   2    3.92    1.36
  18   6  -2    4.03    1.53
 -18  -6   3   13.02    2.30
 -18  -6   3   12.64    2.14
  18   6  -3   12.72    2.48
  18   6  -3   15.13    2.32
 -18  -6   4    0.99    1.03
 -18  -6   4    2.00    1.03
  18   6  -4    1.76    1.29
  18   6  -4    1.96    1.24
 -18  -6   5   17.73    2.72
 -18  -6   5   19.83    2.62
  18   6  -5   22.87    3.08
  18   6  -5   19.05    2.75
 -18  -6   6   75.89    6.06
 -18  -6   6   71.28    5.65
  18   6  -6   84.22    6.53
  18   6  -6   75.33    5.84
 -18  -6   7   25.29    3.17
 -18  -6   7   23.90    2.98
  18   6  -7   26.09    3.37
  18   6  -7   26.19    3.17
 -18  -6   8   68.38    5.77
 -18  -6   8   71.93    5.70
  18   6  -8   85.75    6.57
  18   6  -8   87.99    6.33
 -18  -6   9  126.35    8.56
 -18  -6   9  111.46    7.76
  18   6  -9  134.96    8.95
  18   6  -9  139.05    8.80
 -18  -6  10   83.32    6.43
  18   6 -10   82.33    6.58
 -18  -6  11  257.23   14.87
 -18  -6  11  244.11   14.00
  18   6 -11  266.63   15.34
  18   6 -11  305.13   16.41
 -18  -6  12   36.14    3.90
 -18  -6  12   39.11    3.80
  18   6 -12   34.36    3.99
  18   6 -12   40.19    4.02
 -18  -6  13  318.94   18.17
 -18  -6  13  312.34   17.14
  18   6 -13  359.86   19.53
  18   6 -13  398.69   20.63
 -18  -6  14   10.62    2.02
 -18  -6  14    6.62    1.89
  18   6 -14   11.26    2.25
  18   6 -14   10.41    2.43
 -18  -6  15  306.68   17.31
 -18  -6  15  308.66   17.05
  18   6 -15  373.22   19.92
 -18  -6  16  103.01    7.51
  18   6 -16  119.86    8.46
 -18  -6  17  140.66    9.56
 -18  -6  17  149.48    9.83
  18   6 -17  176.98   11.04
  18   6 -17  182.79   11.41
 -18  -6  18  105.64    7.52
 -18  -6  18   94.48    7.26
 -18  -6  19   28.97    3.36
 -18  -6  19   22.51    3.37
 -18  -5   1  164.11   10.45
 -18  -5   1  151.70    9.63
  18   5  -1  172.54   10.61
 -18  -5   2  276.02   15.78
 -18  -5   2  275.49   15.33
  18   5  -2  312.52   17.26
  18   5  -2  293.64   16.17
 -18  -5   3   14.95    2.49
 -18  -5   3   16.56    2.46
  18   5  -3   17.41    2.79
  18   5  -3   21.08    2.69
 -18  -5   4  359.63   19.43
 -18  -5   4  331.47   17.98
  18   5  -4  371.25   20.00
  18   5  -4  367.44   19.49
 -18  -5   5   10.35    1.89
 -18  -5   5    8.72    1.78
  18   5  -5    7.44    1.91
  18   5  -5    5.76    1.78
 -18  -5   6  277.75   15.84
 -18  -5   6  280.07   15.56
  18   5  -6  330.25   17.89
  18   5  -6  308.90   16.74
 -18  -5   7   19.32    2.61
 -18  -5   7   15.46    2.38
  18   5  -7   17.40    2.71
  18   5  -7   13.60    2.46
 -18  -5   8  135.26    8.99
 -18  -5   8  126.32    8.40
  18   5  -8  148.25    9.57
  18   5  -8  147.11    9.20
 -18  -5   9   38.03    3.95
  18   5  -9   40.56    4.17
 -18  -5  10   24.09    3.17
  18   5 -10   33.76    3.66
 -18  -5  11   66.73    5.48
 -18  -5  11   60.38    5.03
 -18  -5  12    0.50    0.76
 -18  -5  12   -0.12    0.85
 -18  -5  13   20.41    2.86
 -18  -5  13   20.33    2.76
  18   5 -13   24.10    3.17
  18   5 -13   19.82    3.09
 -18  -5  14   11.22    2.15
 -18  -5  14   11.39    2.11
  18   5 -14   13.36    2.48
  18   5 -14   10.04    2.53
 -18  -5  15    1.62    1.08
 -18  -5  15    2.44    1.22
  18   5 -15    1.35    1.43
  18   5 -15    0.30    1.74
 -18  -5  16    2.66    1.38
  18   5 -16    3.06    1.89
 -18  -5  17   41.83    4.37
  18   5 -17   45.28    4.80
  18   5 -17   55.81    5.19
 -18  -5  18   11.75    2.19
 -18  -5  18   10.13    2.28
  18   5 -18   15.51    2.61
  18   5 -18   10.81    2.79
 -18  -5  19   42.28    4.31
 -18  -5  19   41.96    4.55
  18   5 -19   47.53    4.65
  18   5 -19   47.58    5.02
 -18  -4   1    3.82    1.35
  18   4  -1    3.97    1.61
  18   4  -1    3.68    1.41
 -18  -4   2    2.28    1.16
 -18  -4   2    1.33    1.02
  18   4  -2    2.70    1.29
  18   4  -2    2.27    1.15
 -18  -4   3    3.58    1.24
 -18  -4   3    3.53    1.30
  18   4  -3    2.71    1.40
  18   4  -3    2.21    1.28
 -18  -4   4   41.13    4.10
 -18  -4   4   36.45    3.78
  18   4  -4   42.27    4.26
  18   4  -4   41.49    4.03
 -18  -4   5    2.68    1.21
 -18  -4   5    3.29    1.25
  18   4  -5    3.02    1.41
  18   4  -5    1.85    1.26
 -18  -4   6  111.86    7.79
 -18  -4   6  110.16    7.50
  18   4  -6  116.35    8.07
  18   4  -6  115.84    7.81
 -18  -4   7    1.52    1.09
 -18  -4   7    1.45    1.07
  18   4  -7    1.18    1.18
  18   4  -7    1.72    1.12
 -18  -4   8   65.54    5.44
 -18  -4   8   65.72    5.24
  18   4  -8   60.04    5.34
  18   4  -8   69.77    5.51
 -18  -4   9   23.48    3.08
  18   4  -9   30.29    3.42
 -18  -4  10  187.55   11.64
  18   4 -10  201.25   12.09
  18   4 -10  212.45   12.31
 -18  -4  11  179.98   11.37
 -18  -4  11  185.87   11.18
  18   4 -11  224.19   12.95
  18   4 -11  220.09   12.61
 -18  -4  12  108.01    7.82
 -18  -4  12  118.61    7.92
  18   4 -12  125.06    8.49
  18   4 -12  140.82    8.95
 -18  -4  13  261.27   15.27
 -18  -4  13  254.71   14.54
  18   4 -13  285.29   15.95
  18   4 -13  309.58   16.87
 -18  -4  14    0.57    1.09
 -18  -4  14    1.80    1.17
  18   4 -14    2.88    1.42
  18   4 -14    2.07    1.69
 -18  -4  15  244.03   14.56
 -18  -4  15  251.29   14.49
  18   4 -15  291.67   16.16
  18   4 -15  301.35   16.77
 -18  -4  16    1.05    1.11
 -18  -4  16    0.25    1.08
  18   4 -16    2.59    1.47
  18   4 -16    0.70    1.65
 -18  -4  17  178.30   11.41
 -18  -4  17  183.92   11.52
  18   4 -17  230.97   13.58
 -18  -4  18    2.43    1.24
  18   4 -18    2.22    1.80
 -18  -4  19   83.46    6.91
  18   4 -19   85.59    6.82
  18   4 -19  104.87    7.86
 -18  -3   1  227.53   13.49
 -18  -3   1  235.73   13.39
  18   3  -1  235.26   13.84
  18   3  -1  259.55   14.43
 -18  -3   2  284.82   15.93
 -18  -3   2  267.17   14.88
  18   3  -2  287.02   16.07
  18   3  -2  269.91   15.16
 -18  -3   3   55.70    4.92
 -18  -3   3   51.42    4.60
  18   3  -3   53.32    4.96
  18   3  -3   61.15    5.01
 -18  -3   4  396.19   21.16
 -18  -3   4  357.78   19.31
  18   3  -4  445.89   23.00
  18   3  -4  424.74   21.91
 -18  -3   5    7.72    1.79
 -18  -3   5    7.82    1.75
  18   3  -5    9.94    2.09
  18   3  -5    7.66    1.84
 -18  -3   6  277.82   15.92
 -18  -3   6  298.33   16.23
  18   3  -6  325.49   17.63
  18   3  -6  322.00   17.21
 -18  -3   7    1.96    1.01
 -18  -3   7    1.29    1.10
  18   3  -7    0.79    1.12
  18   3  -7    2.17    1.14
 -18  -3   8  151.69    9.85
  18   3  -8  176.37   10.72
 -18  -3   9   37.41    3.99
  18   3  -9   43.64    4.25
 -18  -3  10  132.79    9.09
 -18  -3  10  146.25    9.31
  18   3 -10  154.06    9.73
  18   3 -10  142.20    9.18
 -18  -3  11   76.80    6.19
 -18  -3  11   74.17    5.78
  18   3 -11   86.39    6.46
  18   3 -11   82.89    6.27
 -18  -3  12   10.84    2.07
 -18  -3  12    9.52    1.91
  18   3 -12    8.41    2.02
  18   3 -12    7.67    2.24
 -18  -3  13   54.55    4.97
 -18  -3  13   52.65    4.71
  18   3 -13   62.55    5.26
  18   3 -13   57.51    5.22
 -18  -3  14    2.74    1.25
 -18  -3  14    2.02    1.10
  18   3 -14    1.21    1.36
  18   3 -14    1.15    1.73
 -18  -3  15    5.43    1.60
 -18  -3  15    4.70    1.58
  18   3 -15    4.55    1.70
  18   3 -15    4.24    1.92
 -18  -3  16    0.07    0.88
  18   3 -16    0.95    1.23
  18   3 -16   -0.06    1.52
 -18  -3  17   36.47    4.13
  18   3 -17   47.18    4.51
  18   3 -17   47.32    4.83
 -18  -3  18    1.92    1.48
  18   3 -18    6.07    1.78
  18   3 -18    4.96    2.15
 -18  -3  19   41.32    4.46
 -18  -3  20   33.78    4.11
  18   3 -20   42.35    4.73
  18   2  -1   13.24    2.38
  18   2  -1   12.02    2.25
 -18  -2   2    5.38    1.54
 -18  -2   2    2.76    1.34
  18   2  -2    5.95    1.63
  18   2  -2    3.79    1.53
 -18  -2   3    2.14    1.08
 -18  -2   3    2.09    1.12
  18   2  -3    2.02    1.22
  18   2  -3    0.83    1.17
 -18  -2   4    2.21    1.10
 -18  -2   4    1.40    0.97
  18   2  -4    0.24    1.18
  18   2  -4    2.26    1.26
  18   2  -5   14.98    2.41
  18   2  -5   13.86    2.31
 -18  -2   6   36.56    3.86
 -18  -2   6   34.36    3.54
  18   2  -6   34.83    3.78
  18   2  -6   38.20    3.77
 -18  -2   7    4.81    1.57
 -18  -2   7    6.33    1.54
  18   2  -7    5.92    1.75
  18   2  -7    4.87    1.54
 -18  -2   8  187.58   11.80
  18   2  -8  228.20   13.06
 -18  -2   9   29.64    3.49
  18   2  -9   33.06    3.64
  18   2 -10  352.10   19.00
  18   2 -10  361.48   19.40
 -18  -2  11  125.16    8.39
 -18  -2  11  140.13    9.76
  18   2 -11  150.54    9.48
  18   2 -11  155.26    9.69
 -18  -2  12  184.81   11.13
 -18  -2  12  183.21   11.89
  18   2 -12  197.48   11.85
  18   2 -12  229.48   13.12
 -18  -2  13  214.44   12.76
 -18  -2  13  224.02   13.86
  18   2 -13  286.53   15.60
  18   2 -13  273.70   15.36
  18   2 -14   25.40    3.19
  18   2 -14   22.76    3.45
 -18  -2  15  267.76   15.37
 -18  -2  15  279.12   16.42
  18   2 -15  313.19   17.09
  18   2 -15  333.97   18.24
 -18  -2  16   19.05    2.91
 -18  -2  16   20.65    3.02
  18   2 -16   26.08    3.18
  18   2 -16   23.04    3.43
 -18  -2  17  213.96   13.16
 -18  -2  17  218.74   13.62
  18   2 -17  272.92   15.13
  18   2 -17  273.58   15.66
 -18  -2  18    3.05    1.55
 -18  -2  18    5.12    1.64
  18   2 -18    4.81    1.72
  18   2 -18    5.09    2.01
 -18  -2  19   63.33    5.86
 -18  -2  19   58.91    5.58
  18   2 -19   81.18    6.16
  18   2 -19   72.94    6.39
 -18  -2  20   45.95    4.95
 -18  -2  20   52.63    5.09
  18   2 -20   61.51    5.32
  18   2 -20   58.83    5.60
 -18  -2  21   21.86    3.38
 -18  -2  21   24.99    3.36
 -18  -1   1  289.16   16.23
 -18  -1   1  272.56   15.19
  18   1  -1  300.59   16.59
  18   1  -1  298.86   16.22
 -18  -1   2  232.05   13.44
 -18  -1   2  212.03   12.33
  18   1  -2  236.00   13.49
  18   1  -2  206.79   12.27
 -18  -1   3  208.66   12.48
 -18  -1   3  203.94   11.86
 -18  -1   4  485.25   25.39
 -18  -1   4  435.86   22.75
  18   1  -4  514.53   26.07
  18   1  -4  480.94   24.52
 -18  -1   5   83.14    6.47
 -18  -1   5   81.68    6.11
  18   1  -5   93.77    6.76
  18   1  -5   90.63    6.48
  18   1  -6  413.81   21.74
  18   1  -6  415.31   21.57
 -18  -1   7   21.85    2.82
  18   1  -7   25.92    3.15
  18   1  -7   27.59    3.17
 -18  -1   8  281.87   16.50
  18   1  -8  296.42   16.32
 -18  -1   9   24.96    3.30
  18   1  -9   26.67    3.23
 -18  -1  10  195.42   12.25
  18   1 -10  214.78   12.52
 -18  -1  11   31.42    3.79
  18   1 -11   40.25    3.96
 -18  -1  12    5.80    1.60
  18   1 -12    1.61    1.39
  18   1 -12    1.43    1.73
 -18  -1  13    3.99    1.59
 -18  -1  13    7.33    1.77
  18   1 -13    4.97    1.59
  18   1 -13    5.14    2.09
 -18  -1  14    2.72    1.36
  18   1 -14    3.15    1.41
  18   1 -14   -0.16    1.72
 -18  -1  15    5.55    1.78
  18   1 -15    8.40    1.93
  18   1 -15    6.74    2.14
 -18  -1  16    6.01    1.77
  18   1 -16    5.22    1.76
  18   1 -16    6.41    2.28
 -18  -1  17   42.82    4.58
  18   1 -17   59.48    5.02
 -18  -1  18    1.46    1.30
  18   1 -18    3.99    1.47
 -18  -1  19   27.57    3.59
  18   1 -19   36.01    3.85
 -18  -1  20    9.18    2.50
 -18  -1  20   12.98    2.56
  18   1 -20   21.55    2.87
 -18  -1  21   75.71    6.68
 -18  -1  21   82.88    6.66
 -18   0   1  111.71    7.82
 -18   0   1  110.28    7.43
  18   0  -1  106.08    7.60
  18   0  -1  110.69    7.78
 -18   0   2    9.67    1.99
 -18   0   2    7.52    1.77
  18   0  -2    7.21    1.88
  18   0  -2    9.18    1.88
 -18   0   3    8.67    1.91
 -18   0   3    7.17    1.69
  18   0  -3    6.09    1.86
  18   0  -3    8.62    1.85
 -18   0   4    1.83    1.04
 -18   0   4    0.97    1.02
  18   0  -4    1.44    1.08
  18   0  -4    2.05    1.10
 -18   0   5    7.84    1.67
 -18   0   5    7.86    1.90
  18   0  -5    9.20    1.90
  18   0  -5    7.73    1.84
 -18   0   6   79.15    5.91
 -18   0   6   74.23    6.23
  18   0  -6   86.71    6.38
  18   0  -6   89.11    6.35
 -18   0   7   26.33    3.05
 -18   0   7   25.26    3.35
  18   0  -7   26.75    3.27
  18   0  -7   32.03    3.39
 -18   0   8  276.06   15.34
 -18   0   8  284.20   16.32
  18   0  -8  314.11   16.92
 -18   0   9    0.12    0.93
  18   0  -9    0.56    0.93
 -18   0  10  391.56   21.27
  18   0 -10  404.17   21.26
 -18   0  11   28.90    3.59
  18   0 -11   34.47    3.64
 -18   0  12  227.59   13.81
  18   0 -12  264.67   14.76
 -18   0  13  169.94   10.99
  18   0 -13  184.43   11.14
 -18   0  14  226.04   13.64
  18   0 -14  246.26   14.05
  18   0 -15  374.79   20.05
 -18   0  16  155.32   10.04
 -18   0  16  143.42    9.77
  18   0 -16  171.95   10.44
 -18   0  17  281.74   16.32
 -18   0  17  290.96   16.80
  18   0 -17  337.84   18.16
  18   0 -17  355.92   19.35
 -18   0  18    8.89    2.16
 -18   0  18    8.19    2.06
  18   0 -18   10.26    2.15
  18   0 -18   10.81    2.62
 -18   0  19  171.09   11.38
 -18   0  19  176.09   11.45
  18   0 -19  224.77   12.93
  18   0 -19  220.28   13.35
 -18   0  20   32.50    4.14
 -18   0  20   35.63    4.06
  18   0 -20   45.20    4.34
  18   0 -20   42.42    4.63
 -18   0  21   81.98    7.12
 -18   0  21   88.42    7.13
  18   0 -21  106.51    7.60
  18   0 -21  108.97    8.12
 -18   1   1  310.86   17.47
 -18   1   1  308.12   16.68
 -18   1   1  259.57   16.68
  18  -1  -1  390.09   23.01
  18  -1  -1  368.27   21.93
 -18   1   2   58.60    5.15
 -18   1   2   56.09    4.72
  18  -1  -3  623.31   31.16
  18  -1  -3  623.68   31.07
  18  -1  -4  116.76    7.95
  18  -1  -4  117.16    7.84
 -18   1   5  621.13   31.07
 -18   1   5  641.03   32.95
  18  -1  -5  655.69   32.65
  18  -1  -5  704.89   34.40
 -18   1   6  220.38   12.83
 -18   1   6  247.08   14.49
  18  -1  -6  265.22   14.69
  18  -1  -6  254.62   14.17
 -18   1   7   75.73    5.84
 -18   1   7   81.73    6.48
  18  -1  -7   91.33    6.53
  18  -1  -7   84.00    6.24
 -18   1   8  480.93   24.76
 -18   1   8  537.46   27.74
  18  -1  -8  541.46   27.37
  18  -1  -8  529.57   26.80
 -18   1   9    8.75    1.76
 -18   1   9    8.02    1.97
  18  -1  -9    8.68    1.89
  18  -1  -9    7.22    1.99
 -18   1  10  147.61    9.38
 -18   1  10  156.75   10.23
  18  -1 -10  169.80   10.36
  18  -1 -10  171.63   10.60
 -18   1  11   -0.30    0.82
 -18   1  11    1.41    1.01
  18  -1 -11    0.64    0.89
  18  -1 -11   -0.50    1.40
 -18   1  12   44.26    4.20
 -18   1  12   46.11    4.55
 -18   1  13    0.82    1.02
 -18   1  13    2.27    1.20
  18  -1 -13    2.68    1.22
  18  -1 -13    0.81    1.66
 -18   1  14    4.06    1.45
 -18   1  14    8.25    1.84
  18  -1 -14    3.99    1.59
  18  -1 -14    2.24    1.74
 -18   1  15    1.01    1.12
 -18   1  15    1.31    1.21
  18  -1 -15    1.42    1.29
  18  -1 -15    1.83    1.57
 -18   1  16    5.94    1.79
 -18   1  16    9.02    2.02
  18  -1 -16    8.79    2.01
  18  -1 -16    7.64    2.24
 -18   1  17   16.77    2.83
 -18   1  17   18.51    2.85
  18  -1 -17   18.35    2.75
  18  -1 -17   18.83    3.19
 -18   1  18    6.14    1.85
 -18   1  18    7.74    1.95
  18  -1 -18    7.50    1.94
  18  -1 -18    7.91    2.30
 -18   1  19   38.99    4.46
 -18   1  19   41.95    4.50
  18  -1 -19   51.67    4.67
  18  -1 -19   55.38    5.28
 -18   1  20    1.67    1.20
 -18   1  20    2.44    1.30
  18  -1 -20    0.11    1.32
  18  -1 -20   -0.12    1.44
 -18   1  21   98.46    8.03
 -18   1  21   98.41    7.69
  18  -1 -21  129.28    8.57
  18  -1 -21  127.16    9.09
 -18   2   1  174.88   10.68
  18  -2  -1  199.00   11.77
  18  -2  -1  200.37   11.67
  18  -2  -1  190.72   12.46
  18  -2  -1  199.37   12.84
 -18   2   2    3.62    1.29
 -18   2   2    4.28    1.50
 -18   2   2    3.37    0.97
  18  -2  -2    3.16    1.45
  18  -2  -2    3.43    1.38
  18  -2  -2    6.14    1.15
 -18   2   4    1.08    0.90
 -18   2   4    0.30    0.93
  18  -2  -4   -0.56    0.99
  18  -2  -4    1.40    1.01
 -18   2   5   21.43    2.74
 -18   2   5   23.63    3.13
  18  -2  -5   23.49    2.96
  18  -2  -5   24.63    2.96
 -18   2   6  102.91    7.15
 -18   2   6  105.21    7.73
  18  -2  -6  117.98    7.89
  18  -2  -6  122.37    7.94
 -18   2   7   86.38    6.35
 -18   2   7   88.17    6.85
  18  -2  -7   94.28    6.79
  18  -2  -7  103.66    7.08
 -18   2   8  219.03   12.80
 -18   2   8  243.97   14.29
  18  -2  -8  250.60   14.11
  18  -2  -8  282.24   15.32
 -18   2   9   57.12    4.82
 -18   2   9   55.73    5.17
  18  -2  -9   61.73    5.14
  18  -2  -9   66.66    5.43
 -18   2  10  269.33   15.06
 -18   2  10  297.86   16.71
  18  -2 -10  275.78   15.51
  18  -2 -10  311.38   16.99
 -18   2  11    4.12    1.37
 -18   2  11    5.13    1.64
  18  -2 -11    4.98    1.50
  18  -2 -11    3.15    1.84
 -18   2  12  299.93   16.78
 -18   2  12  328.11   18.28
  18  -2 -12  359.60   19.05
  18  -2 -12  368.60   19.74
 -18   2  13   34.92    3.77
 -18   2  13   32.67    3.88
  18  -2 -13   40.07    3.94
  18  -2 -13   43.74    4.41
 -18   2  14  510.03   26.68
 -18   2  14  533.96   27.91
  18  -2 -14  611.39   30.45
  18  -2 -14  653.45   32.62
 -18   2  15  105.81    7.74
 -18   2  15  104.32    7.83
  18  -2 -15  128.54    8.42
  18  -2 -15  134.30    9.06
 -18   2  16  293.33   16.88
 -18   2  16  330.46   18.49
  18  -2 -16  396.54   20.59
  18  -2 -16  380.20   20.53
 -18   2  17  192.04   12.15
 -18   2  17  194.57   12.23
  18  -2 -17  225.13   12.98
  18  -2 -17  224.85   13.62
 -18   2  18   38.07    4.29
 -18   2  18   40.48    4.37
  18  -2 -18   44.69    4.34
  18  -2 -18   49.60    4.93
 -18   2  19  151.96   10.36
 -18   2  19  149.51   10.14
  18  -2 -19  182.39   11.02
  18  -2 -19  179.95   11.50
 -18   2  20    0.79    1.04
 -18   2  20    0.94    1.10
  18  -2 -20    0.37    1.29
  18  -2 -20   -0.84    1.37
 -18   2  21  131.89    9.75
  18  -2 -21  177.89   11.48
 -18   2  22    1.17    1.18
 -18   2  22    1.54    1.51
 -18   3   1  405.01   21.09
 -18   3   1  424.64   22.81
 -18   3   1  374.92   23.09
 -18   3   1  369.92   22.72
  18  -3  -1  394.68   20.95
  18  -3  -1  408.13   21.30
  18  -3  -1  524.17   30.43
  18  -3  -1  479.55   28.22
 -18   3   2   38.79    3.84
 -18   3   2   38.10    4.23
  18  -3  -2   35.34    3.95
  18  -3  -2   42.76    4.10
  18  -3  -2   56.12    4.46
  18  -3  -2   53.60    4.35
 -18   3   3  749.82   36.85
 -18   3   3  801.43   39.77
 -18   3   3  617.09   37.25
  18  -3  -3  809.05   39.40
  18  -3  -3  854.23   41.03
  18  -3  -3  907.31   51.64
 -18   3   4    4.09    1.16
 -18   3   4    3.83    1.43
 -18   3   4    1.83    0.69
  18  -3  -4    3.00    1.25
  18  -3  -4    1.99    1.31
  18  -3  -4    1.89    0.73
  18  -3  -4    1.38    0.72
 -18   3   5  726.33   35.90
 -18   3   5  780.38   38.88
  18  -3  -5  782.74   38.36
  18  -3  -5  813.20   39.39
 -18   3   6   69.45    5.47
 -18   3   6   71.89    5.95
  18  -3  -6   81.58    6.06
  18  -3  -6   78.58    5.91
 -18   3   7  232.08   13.26
 -18   3   7  256.88   14.79
  18  -3  -7  251.13   14.19
  18  -3  -7  248.11   14.07
 -18   3   8  349.86   18.70
 -18   3   8  371.33   20.17
  18  -3  -8  393.43   20.56
  18  -3  -8  374.18   19.90
 -18   3   9  200.26   11.69
 -18   3   9  202.91   12.34
 -18   3  10   99.45    7.13
 -18   3  10  109.11    7.87
  18  -3 -10  121.10    7.97
  18  -3 -10  117.78    8.14
 -18   3  11   44.46    4.21
 -18   3  11   42.47    4.42
  18  -3 -11   50.44    4.49
  18  -3 -11   50.74    4.77
 -18   3  12   19.99    2.71
 -18   3  12   19.20    2.87
 -18   3  13    1.54    1.01
 -18   3  13    1.40    1.14
  18  -3 -13    0.56    1.05
  18  -3 -13    0.62    1.35
 -18   3  14   17.11    2.62
 -18   3  14   15.45    2.65
  18  -3 -14   20.26    2.67
  18  -3 -14   15.45    2.89
 -18   3  15    3.53    1.40
 -18   3  15    3.32    1.49
 -18   3  16    5.88    1.84
 -18   3  16    5.73    1.88
  18  -3 -16    7.55    1.84
  18  -3 -16    6.11    2.21
 -18   3  17    4.68    1.49
 -18   3  17    1.70    1.45
  18  -3 -17    3.61    1.53
  18  -3 -17    2.93    1.75
 -18   3  18   26.55    3.56
 -18   3  18   28.94    3.66
  18  -3 -18   35.91    3.73
  18  -3 -18   37.29    4.22
 -18   3  19   41.66    4.54
  18  -3 -19   47.84    4.95
 -18   3  20   14.86    2.84
 -18   3  20   17.98    2.80
  18  -3 -20   19.09    2.80
  18  -3 -20   22.62    3.38
 -18   3  21   83.52    7.16
 -18   3  21   82.76    6.73
  18  -3 -21  110.20    7.53
 -18   3  22    0.32    1.24
 -18   4   1   73.82    5.67
 -18   4   1   83.02    6.44
 -18   4   1   67.25    5.68
  18  -4  -1   76.21    5.93
  18  -4  -1   79.47    5.92
  18  -4  -1   85.72    6.46
 -18   4   2    9.62    1.91
 -18   4   2   12.08    2.33
  18  -4  -2   12.84    2.19
  18  -4  -2   10.93    2.13
 -18   4   4   25.04    2.92
 -18   4   4   26.20    3.33
 -18   4   4   22.56    2.70
 -18   4   4   20.83    2.58
  18  -4  -4   27.93    3.18
  18  -4  -4   27.97    3.16
  18  -4  -4   29.93    2.93
  18  -4  -4   27.89    2.87
 -18   4   5   73.39    5.85
  18  -4  -5   74.32    5.90
  18  -4  -5   84.37    6.23
  18  -4  -5   93.64    6.62
 -18   4   6   31.18    3.33
 -18   4   6   33.49    3.77
 -18   4   6   27.24    2.99
 -18   4   6   27.84    3.02
  18  -4  -6   38.81    3.73
  18  -4  -6   36.90    3.73
  18  -4  -6   36.65    3.30
  18  -4  -6   38.61    3.41
 -18   4   7   79.42    6.04
 -18   4   7   82.77    6.61
  18  -4  -7   93.48    6.68
  18  -4  -7  102.65    7.09
  18  -4  -7   90.08    6.57
 -18   4   8   83.66    6.31
 -18   4   8   88.80    6.88
  18  -4  -8  107.43    7.27
  18  -4  -8  110.06    7.51
 -18   4   9   95.68    6.91
 -18   4   9  103.28    7.57
  18  -4  -9  105.68    7.35
  18  -4  -9  120.96    8.14
 -18   4  10  137.39    9.07
 -18   4  10  152.32   10.00
  18  -4 -10  169.94   10.27
  18  -4 -10  172.35   10.67
 -18   4  11   60.23    5.22
 -18   4  11   69.93    5.82
  18  -4 -11   70.93    5.59
  18  -4 -11   71.88    5.98
 -18   4  12  239.69   13.98
 -18   4  12  256.88   14.94
  18  -4 -12  266.79   14.90
  18  -4 -12  299.30   16.55
 -18   4  13   16.89    2.58
 -18   4  13   16.75    2.72
  18  -4 -13   17.90    2.55
  18  -4 -13   18.69    3.03
  18  -4 -13   17.84    2.18
 -18   4  14  362.93   19.83
 -18   4  14  363.48   20.07
  18  -4 -14  425.17   21.97
  18  -4 -14  436.44   23.01
  18  -4 -14  394.46   23.87
  18  -4 -14  414.01   24.87
 -18   4  15    9.34    1.88
 -18   4  15    7.76    1.90
 -18   4  15    2.73    1.22
  18  -4 -15   12.30    1.99
  18  -4 -15    9.11    2.12
  18  -4 -15    6.76    1.37
  18  -4 -15    6.58    1.43
 -18   4  16  307.75   17.18
 -18   4  16  329.19   18.01
 -18   4  16  220.69   14.96
 -18   4  16  222.70   14.98
  18  -4 -16  352.33   18.49
  18  -4 -16  377.26   20.19
  18  -4 -16  341.83   20.70
  18  -4 -16  358.09   21.44
 -18   4  17   19.65    2.71
 -18   4  17    7.03    2.04
  18  -4 -17   20.90    3.12
  18  -4 -17   15.44    2.23
  18  -4 -17   15.15    2.16
 -18   4  18   94.77    7.38
 -18   4  18   91.44    7.25
  18  -4 -18  108.26    7.50
  18  -4 -18  119.55    8.61
  18  -4 -18  104.60    7.74
 -18   4  19  104.31    8.06
 -18   4  19  104.27    7.77
  18  -4 -19  129.16    8.48
 -18   4  20   53.30    5.17
  18  -4 -20   73.89    5.79
 -18   4  21  114.71    8.77
 -18   4  21  111.45    8.20
  18  -4 -21  145.56    9.29
 -18   4  22   36.76    4.48
 -18   4  22   39.67    4.26
 -18   5   1  385.62   20.18
 -18   5   1  404.81   21.68
 -18   5   1  346.99   21.73
 -18   5   1  357.71   22.06
  18  -5  -1  381.43   20.32
  18  -5  -1  413.56   21.34
  18  -5  -1  454.25   26.91
  18  -5  -1  440.19   26.28
 -18   5   2  174.94   10.53
 -18   5   2  181.64   11.38
 -18   5   2  160.03   11.07
 -18   5   2  159.53   10.97
  18  -5  -2  187.89   11.21
  18  -5  -2  184.01   10.95
  18  -5  -2  228.05   14.23
  18  -5  -2  210.62   13.44
 -18   5   3  490.12   24.81
 -18   5   3  493.66   25.72
 -18   5   3  437.82   26.68
 -18   5   3  383.10   23.92
  18  -5  -3  521.80   26.32
  18  -5  -3  487.03   24.86
  18  -5  -3  608.97   35.17
  18  -5  -3  541.81   31.83
 -18   5   4   50.16    4.50
 -18   5   4   54.73    5.08
  18  -5  -4   50.01    4.69
  18  -5  -4   52.75    4.76
  18  -5  -4   69.42    5.30
  18  -5  -4   68.89    5.33
 -18   5   5  459.02   23.43
 -18   5   5  473.45   24.73
 -18   5   5  403.64   24.75
 -18   5   5  368.50   23.30
  18  -5  -5  468.08   24.02
  18  -5  -5  487.33   24.72
  18  -5  -5  493.77   29.06
  18  -5  -5  505.52   29.77
 -18   5   6    1.97    0.97
 -18   5   6    0.48    1.03
 -18   5   6    1.22    0.69
 -18   5   6    1.18    0.76
  18  -5  -6    2.88    1.12
  18  -5  -6    1.95    1.38
  18  -5  -6    1.39    0.78
  18  -5  -6    1.10    0.76
 -18   5   7  300.25   16.34
 -18   5   7  318.51   17.63
 -18   5   7  259.23   16.75
 -18   5   7  269.81   17.22
  18  -5  -7  336.75   17.88
  18  -5  -7  328.70   17.73
  18  -5  -7  343.39   20.69
  18  -5  -7  348.24   21.01
 -18   5   8   11.07    1.89
 -18   5   8   10.74    2.09
 -18   5   8    7.16    1.50
 -18   5   8    6.99    1.53
  18  -5  -8   13.81    2.12
  18  -5  -8   15.47    2.40
  18  -5  -8   10.09    1.60
  18  -5  -8   10.00    1.63
 -18   5   9  223.54   12.82
 -18   5   9  225.53   13.37
 -18   5   9  181.35   12.34
 -18   5   9  199.60   13.18
  18  -5  -9  237.43   13.40
  18  -5  -9  256.92   14.46
  18  -5  -9  242.73   15.16
  18  -5  -9  242.37   15.20
 -18   5  10    2.92    1.33
 -18   5  10    5.55    1.52
 -18   5  10    2.37    0.89
 -18   5  10    1.91    0.90
  18  -5 -10    4.11    1.27
  18  -5 -10    4.65    1.69
 -18   5  11   97.77    7.17
 -18   5  11  110.37    7.89
  18  -5 -11  115.45    7.74
  18  -5 -11  115.92    8.16
  18  -5 -11  112.66    7.99
  18  -5 -11  110.38    7.93
 -18   5  12   31.48    3.25
 -18   5  12   33.10    3.55
 -18   5  12   15.24    2.41
 -18   5  12   17.00    2.48
  18  -5 -12   36.43    3.43
  18  -5 -12   37.95    3.88
  18  -5 -12   27.01    2.78
  18  -5 -12   23.44    2.72
 -18   5  13   22.32    2.81
 -18   5  13   22.34    2.98
 -18   5  13   12.35    2.22
 -18   5  13   14.56    2.27
  18  -5 -13   24.49    2.82
  18  -5 -13   19.91    3.07
  18  -5 -13   22.31    2.52
  18  -5 -13   22.05    2.56
 -18   5  14   36.37    3.61
 -18   5  14   34.39    3.71
 -18   5  14   17.71    2.70
 -18   5  14   17.01    2.63
  18  -5 -14   39.59    3.65
  18  -5 -14   42.95    4.19
  18  -5 -14   33.67    3.26
  18  -5 -14   32.75    3.22
 -18   5  15    6.55    1.70
 -18   5  15    2.61    1.28
 -18   5  15    4.63    1.33
  18  -5 -15    7.04    2.08
  18  -5 -15    8.23    1.52
  18  -5 -15    5.48    1.46
 -18   5  16    2.39    1.44
 -18   5  16    3.19    1.45
 -18   5  16    3.02    1.13
  18  -5 -16    0.93    1.35
  18  -5 -16    3.33    1.75
  18  -5 -16    2.74    1.19
  18  -5 -16    3.75    1.25
 -18   5  17    0.16    1.01
 -18   5  17    2.75    1.28
 -18   5  17    1.03    0.93
 -18   5  17    0.04    0.92
  18  -5 -17    1.55    1.13
  18  -5 -17   -0.31    1.00
  18  -5 -17    0.42    1.04
 -18   5  18   15.87    2.95
 -18   5  18   19.97    2.97
  18  -5 -18   20.30    2.77
  18  -5 -18   21.76    2.84
  18  -5 -18   22.98    2.84
 -18   5  19    2.94    1.44
 -18   5  19    3.26    1.43
  18  -5 -19    2.94    1.55
 -18   5  20   14.77    2.88
 -18   5  20   21.66    2.98
  18  -5 -20   23.99    3.09
 -18   5  21   45.16    4.95
 -18   5  21   44.46    4.61
  18  -5 -21   62.17    5.19
 -18   5  22   26.05    3.68
 -18   5  22   26.22    3.45
 -18   6   1   31.82    3.24
 -18   6   1   34.24    3.66
 -18   6   1   21.59    2.85
  18  -6  -1   33.45    3.48
  18  -6  -1   30.78    3.31
 -18   6   2    7.03    1.54
 -18   6   2    6.30    1.85
  18  -6  -2    6.81    1.69
  18  -6  -2    4.35    1.60
 -18   6   3    1.85    1.04
 -18   6   3    1.74    1.31
 -18   6   3    2.25    0.98
 -18   6   3    2.23    0.91
  18  -6  -3    1.43    1.14
  18  -6  -3    1.59    1.24
  18  -6  -3    1.98    1.11
  18  -6  -3    3.95    1.11
 -18   6   4   63.02    5.03
 -18   6   4   65.93    5.59
 -18   6   4   57.80    5.08
 -18   6   4   51.05    4.69
  18  -6  -4   65.81    5.29
  18  -6  -4   70.73    5.52
  18  -6  -4   68.54    5.45
  18  -6  -4   70.69    5.63
 -18   6   5  116.39    7.80
 -18   6   5  115.40    8.25
 -18   6   5  117.93    8.52
  18  -6  -5  120.93    8.14
  18  -6  -5  128.79    8.48
  18  -6  -5  142.54    9.65
 -18   6   6    9.30    1.92
  18  -6  -6   17.19    2.40
  18  -6  -6   15.65    2.46
  18  -6  -6   15.91    2.11
  18  -6  -6   13.06    2.02
 -18   6   7   75.76    5.86
 -18   6   7   84.14    6.56
 -18   6   7   74.20    5.99
 -18   6   7   73.14    6.01
  18  -6  -7   81.57    6.16
  18  -6  -7   89.04    6.67
  18  -6  -7   94.34    6.78
  18  -6  -7   97.40    7.04
 -18   6   8    2.27    0.95
 -18   6   8    1.30    1.03
 -18   6   8    1.12    0.72
 -18   6   8    0.09    0.74
  18  -6  -8    2.84    1.17
  18  -6  -8    2.77    1.47
  18  -6  -8    1.08    0.78
  18  -6  -8    1.38    0.83
 -18   6   9   93.91    6.83
 -18   6   9   96.03    7.27
 -18   6   9   94.53    7.16
 -18   6   9   94.67    7.20
  18  -6  -9  103.52    7.20
  18  -6  -9  109.24    7.75
  18  -6  -9  116.32    8.07
  18  -6  -9  119.05    8.29
 -18   6  10   59.26    4.87
 -18   6  10   59.31    5.14
 -18   6  10   44.96    4.32
 -18   6  10   43.14    4.30
  18  -6 -10   61.37    4.95
  18  -6 -10   67.67    5.47
  18  -6 -10   56.90    4.77
  18  -6 -10   54.59    4.76
 -18   6  11  131.90    8.70
 -18   6  11  136.22    9.14
 -18   6  11  125.12    8.94
 -18   6  11  113.48    8.49
  18  -6 -11  145.72    9.11
  18  -6 -11  162.89   10.16
 -18   6  12  202.30   12.15
 -18   6  12  213.43   12.84
 -18   6  12  172.67   12.01
  18  -6 -12  218.99   12.62
  18  -6 -12  245.54   14.09
  18  -6 -12  237.48   15.03
 -18   6  13  104.31    7.57
 -18   6  13   98.08    7.55
 -18   6  13  100.34    7.64
  18  -6 -13  129.07    8.80
  18  -6 -13  130.82    9.00
  18  -6 -13  131.78    9.07
 -18   6  14  230.47   13.52
 -18   6  14  229.96   13.60
 -18   6  14  182.76   12.69
 -18   6  14  203.76   13.59
  18  -6 -14  240.59   13.60
  18  -6 -14  260.64   15.10
  18  -6 -14  250.55   15.83
  18  -6 -14  269.98   16.77
 -18   6  15    3.09    1.38
 -18   6  15    4.27    1.46
 -18   6  15    2.27    1.11
 -18   6  15    1.92    1.14
  18  -6 -15    3.40    1.44
  18  -6 -15    4.11    1.30
 -18   6  16  206.13   12.58
 -18   6  16  213.94   12.83
 -18   6  16  171.04   12.04
 -18   6  16  185.15   12.57
  18  -6 -16  263.79   16.44
  18  -6 -16  235.00   14.92
 -18   6  17    6.32    1.71
 -18   6  17    5.93    1.71
  18  -6 -17    7.12    1.81
  18  -6 -17    9.39    1.90
  18  -6 -17   12.15    2.01
 -18   6  18   97.70    7.58
 -18   6  18   92.22    7.19
  18  -6 -18  109.05    7.53
  18  -6 -18  105.63    8.03
  18  -6 -18  113.39    8.24
 -18   6  19   10.55    2.30
 -18   6  19    9.03    2.20
  18  -6 -19   14.75    2.35
  18  -6 -20  169.01   10.62
 -18   6  21   25.35    3.60
  18  -6 -21   28.69    3.47
 -18   7   1  202.14   11.85
 -18   7   1  224.45   13.28
 -18   7   1  189.15   12.87
 -18   7   1  195.20   12.95
  18  -7  -1  222.67   12.81
  18  -7  -1  223.47   12.74
  18  -7  -1  242.11   15.29
  18  -7  -1  226.84   14.66
 -18   7   2  310.28   16.85
 -18   7   2  340.52   18.67
 -18   7   2  306.85   19.40
 -18   7   2  292.43   18.53
  18  -7  -2  335.99   18.07
  18  -7  -2  335.54   17.97
  18  -7  -2  381.74   22.96
  18  -7  -2  378.57   22.90
 -18   7   3  385.55   20.28
 -18   7   3  401.88   21.58
 -18   7   3  333.10   21.04
  18  -7  -3  411.96   21.51
  18  -7  -3  435.90   22.43
  18  -7  -3  466.34   27.60
  18  -7  -3  478.24   28.39
 -18   7   4  113.27    7.59
 -18   7   4  112.69    8.10
 -18   7   4  104.37    7.78
  18  -7  -4  112.30    7.76
  18  -7  -4  131.36    8.51
  18  -7  -4  153.45   10.06
 -18   7   5  247.87   13.83
 -18   7   5  263.87   14.99
 -18   7   5  211.30   14.15
 -18   7   5  198.38   13.43
  18  -7  -5  264.96   14.63
  18  -7  -5  270.65   15.00
  18  -7  -5  269.60   16.77
  18  -7  -5  267.55   16.81
 -18   7   6    5.00    1.49
 -18   7   6    6.39    1.79
 -18   7   6    6.34    1.47
 -18   7   6    4.41    1.25
  18  -7  -6    5.61    1.53
  18  -7  -6    4.80    1.73
  18  -7  -6    8.02    1.51
  18  -7  -6    8.08    1.55
 -18   7   7  233.53   13.44
 -18   7   7  260.25   14.90
 -18   7   7  198.53   13.73
 -18   7   7  230.79   15.07
  18  -7  -7  270.92   14.85
  18  -7  -7  277.65   15.39
  18  -7  -7  284.80   17.48
  18  -7  -7  267.51   16.78
 -18   7   8    1.25    0.89
 -18   7   8   -0.46    1.03
 -18   7   8    1.07    0.66
 -18   7   8    1.00    0.76
  18  -7  -8    0.02    0.84
  18  -7  -8    0.25    1.21
  18  -7  -8    0.44    0.75
  18  -7  -8    0.91    0.92
 -18   7   9  257.69   14.65
 -18   7   9  289.78   16.28
 -18   7   9  246.36   16.05
 -18   7   9  250.48   16.27
  18  -7  -9  276.74   15.36
  18  -7  -9  320.78   17.43
  18  -7  -9  329.60   19.95
  18  -7  -9  312.53   19.28
 -18   7  10    2.65    1.24
 -18   7  10    3.66    1.13
 -18   7  10    2.44    1.22
  18  -7 -10    4.64    1.40
  18  -7 -10    4.23    1.72
  18  -7 -10    5.59    1.23
  18  -7 -10    2.99    1.36
 -18   7  11   41.31    4.27
  18  -7 -11   55.95    5.12
  18  -7 -11   56.83    4.76
  18  -7 -11   50.14    4.60
 -18   7  12   40.19    4.00
 -18   7  12   42.55    4.21
 -18   7  12   26.48    3.36
  18  -7 -12   43.80    4.04
  18  -7 -12   48.21    4.69
  18  -7 -12   39.26    3.83
 -18   7  13   18.88    2.77
 -18   7  13   19.80    2.90
  18  -7 -13   19.44    2.68
  18  -7 -13   19.80    2.62
  18  -7 -13   19.85    2.70
 -18   7  14    5.99    1.63
 -18   7  14    3.70    1.51
 -18   7  14    3.58    1.28
 -18   7  14    3.42    1.37
  18  -7 -14    7.57    1.67
  18  -7 -14    4.03    1.37
  18  -7 -14    6.26    1.57
 -18   7  15    4.49    1.57
 -18   7  15    3.73    1.40
 -18   7  15    4.34    1.50
  18  -7 -15    5.40    1.61
  18  -7 -15    5.38    1.48
  18  -7 -15    5.43    1.57
 -18   7  16    1.30    1.18
 -18   7  16    3.51    1.37
 -18   7  16    3.31    1.28
 -18   7  16    2.01    1.34
  18  -7 -16    4.23    1.49
  18  -7 -16    3.21    1.30
  18  -7 -16    5.14    1.49
 -18   7  17    5.96    1.72
 -18   7  17    5.60    1.60
 -18   7  17    2.87    1.43
 -18   7  17    4.16    1.54
  18  -7 -17    6.63    1.61
  18  -7 -17    6.55    1.68
 -18   7  18   23.82    3.37
 -18   7  18   25.04    3.31
  18  -7 -18   28.12    3.33
  18  -7 -18   26.25    3.36
  18  -7 -18   30.40    3.41
 -18   7  19    2.03    1.19
 -18   7  19    1.77    1.21
  18  -7 -19    0.85    1.18
 -18   7  20   13.63    2.54
 -18   7  20    9.79    2.16
 -18   7  21    8.27    2.24
 -18   7  21    9.79    2.10
  18  -7 -21   10.63    2.26
 -18   8   1   21.31    2.64
 -18   8   1   25.69    3.14
 -18   8   1   18.74    2.64
 -18   8   1   18.17    2.50
 -18   8   2   46.54    4.07
 -18   8   2   51.91    4.65
 -18   8   2   40.82    4.09
 -18   8   2   34.79    3.74
  18  -8  -2   46.85    4.26
  18  -8  -2   41.26    4.12
 -18   8   3    1.59    1.05
 -18   8   3    2.29    1.25
 -18   8   3    2.78    1.12
 -18   8   3    2.11    0.99
  18  -8  -3    3.15    1.24
  18  -8  -3    3.20    1.37
  18  -8  -3    3.38    1.21
  18  -8  -3    2.24    1.15
 -18   8   4    5.49    1.44
 -18   8   4    6.54    1.69
 -18   8   4    4.35    1.42
 -18   8   4    5.60    1.30
  18  -8  -4    6.89    1.63
  18  -8  -4    5.15    1.69
  18  -8  -4    5.18    1.45
  18  -8  -4    5.22    1.50
 -18   8   5   13.60    2.23
 -18   8   5   14.78    2.50
 -18   8   5   15.13    2.26
 -18   8   5   12.66    2.03
  18  -8  -5   14.72    2.37
  18  -8  -5   15.56    2.61
  18  -8  -5   20.80    2.44
  18  -8  -5   17.30    2.35
 -18   8   6   26.41    3.01
 -18   8   6   26.49    3.32
 -18   8   6   23.20    2.95
 -18   8   6   21.23    2.73
  18  -8  -6   24.12    3.02
  18  -8  -6   25.88    3.33
  18  -8  -6   29.64    3.12
  18  -8  -6   29.68    3.21
 -18   8   7   12.80    2.19
  18  -8  -7   12.59    2.28
  18  -8  -7   12.45    2.54
  18  -8  -7   18.66    2.32
  18  -8  -7   16.08    2.31
 -18   8   8    1.60    1.05
 -18   8   8    3.25    1.03
 -18   8   8    2.33    1.14
  18  -8  -8    0.84    1.48
  18  -8  -8    3.70    1.11
  18  -8  -8    3.02    1.21
 -18   8   9  166.07   10.34
 -18   8   9  146.96   10.45
 -18   8   9  157.44   10.99
  18  -8  -9  177.58   11.10
  18  -8  -9  202.02   12.89
  18  -8  -9  205.03   13.24
 -18   8  10   39.66    3.94
 -18   8  10   37.78    4.08
 -18   8  10   32.23    3.58
 -18   8  10   32.98    3.75
  18  -8 -10   42.33    3.96
  18  -8 -10   49.18    4.74
  18  -8 -10   45.28    4.06
  18  -8 -10   40.91    4.02
 -18   8  11  226.27   13.37
 -18   8  11  253.50   14.58
 -18   8  11  205.12   13.82
 -18   8  11  228.74   14.96
  18  -8 -11  248.44   13.99
  18  -8 -11  277.95   17.21
  18  -8 -11  277.40   17.29
 -18   8  12   96.85    7.10
 -18   8  12   97.14    7.22
 -18   8  12   81.88    6.72
 -18   8  12   88.52    7.05
  18  -8 -12  106.64    7.23
  18  -8 -12  111.97    8.01
  18  -8 -12  108.88    7.96
 -18   8  13   97.61    7.27
 -18   8  13   86.83    6.99
 -18   8  13   95.47    7.35
  18  -8 -13   95.22    6.87
  18  -8 -13  112.89    8.11
  18  -8 -13  122.30    8.56
 -18   8  14  107.02    7.83
 -18   8  14  122.96    8.36
 -18   8  14   98.31    7.70
 -18   8  14   94.50    7.57
  18  -8 -14  133.53    8.38
  18  -8 -14  121.59    8.73
  18  -8 -14  135.14    9.36
 -18   8  15   49.55    4.74
  18  -8 -15   55.71    4.81
  18  -8 -15   64.81    5.44
 -18   8  16   89.02    6.90
 -18   8  16   90.15    6.84
 -18   8  16   67.17    6.12
 -18   8  16   76.37    6.43
  18  -8 -16  102.61    7.00
  18  -8 -16  101.87    7.60
  18  -8 -16  108.08    7.84
 -18   8  17   27.98    3.50
 -18   8  17   24.98    3.29
 -18   8  17   23.59    3.12
 -18   8  17   22.76    3.11
  18  -8 -17   27.74    3.21
  18  -8 -17   32.02    3.48
 -18   8  18   84.22    6.86
  18  -8 -18   96.74    6.91
  18  -8 -18   82.21    6.86
  18  -8 -18   83.57    6.80
 -18   8  19   -0.14    0.95
 -18   8  19    0.17    0.99
  18  -8 -19    1.33    1.10
 -18   8  20  144.13    9.76
  18  -8 -20  182.15   10.95
 -18   8  21    5.30    1.78
  18  -8 -21    6.87    1.82
 -18   9   1   45.73    4.14
 -18   9   1   39.17    4.12
  18  -9  -1   50.64    4.64
  18  -9  -1   46.89    4.52
 -18   9   2  344.04   18.35
 -18   9   2  330.80   20.80
 -18   9   2  316.23   19.89
  18  -9  -2  364.15   19.42
  18  -9  -2  404.30   24.31
  18  -9  -2  381.12   23.28
 -18   9   3  113.97    7.72
 -18   9   3  104.24    8.07
 -18   9   3  111.62    8.19
  18  -9  -3  134.96    8.73
  18  -9  -3  138.54    9.50
  18  -9  -3  126.06    9.04
 -18   9   4  253.70   14.31
 -18   9   4  248.25   16.15
 -18   9   4  238.77   15.51
  18  -9  -4  265.16   15.10
  18  -9  -4  314.98   19.23
  18  -9  -4  301.83   18.71
 -18   9   5  280.07   15.38
 -18   9   5  249.48   16.27
 -18   9   5  240.15   15.67
  18  -9  -5  281.36   15.85
  18  -9  -5  313.18   19.21
  18  -9  -5  295.76   18.49
 -18   9   6   81.45    6.22
 -18   9   6   84.29    6.76
 -18   9   6   81.52    6.48
  18  -9  -6   91.78    7.00
  18  -9  -6   99.66    7.34
  18  -9  -6  107.23    7.79
 -18   9   7  237.05   13.80
 -18   9   7  243.13   14.37
 -18   9   7  248.34   16.18
 -18   9   7  228.45   15.37
  18  -9  -7  293.34   15.83
  18  -9  -7  316.82   17.24
  18  -9  -7  313.47   19.13
  18  -9  -7  312.53   19.28
 -18   9   8   20.74    2.86
 -18   9   8   27.50    3.30
 -18   9   8   20.53    2.71
 -18   9   8   22.94    2.94
  18  -9  -8   24.87    2.97
  18  -9  -8   20.87    3.27
  18  -9  -8   24.84    2.92
  18  -9  -8   30.29    3.24
 -18   9   9  198.29   11.85
 -18   9   9  214.99   12.69
 -18   9   9  173.06   12.00
 -18   9   9  186.58   12.67
  18  -9  -9  191.89   11.49
  18  -9  -9  229.92   14.55
  18  -9  -9  226.29   14.50
 -18   9  10    0.83    0.85
 -18   9  10    1.60    1.17
 -18   9  10   -0.07    0.73
 -18   9  10    0.07    1.00
  18  -9 -10    1.34    0.95
  18  -9 -10    0.75    0.93
  18  -9 -10    1.02    0.95
 -18   9  11   47.64    4.43
 -18   9  11   32.92    3.70
 -18   9  11   35.43    3.88
  18  -9 -11   49.64    4.25
  18  -9 -11   43.23    4.08
  18  -9 -11   46.95    4.34
 -18   9  12   12.45    2.32
  18  -9 -12   21.95    2.64
  18  -9 -12   17.17    2.49
 -18   9  13   53.13    4.87
 -18   9  13   58.38    5.08
 -18   9  13   41.31    4.36
 -18   9  13   44.03    4.51
  18  -9 -13   60.38    4.84
  18  -9 -13   63.07    5.23
  18  -9 -13   58.88    5.10
 -18   9  14    2.96    1.23
 -18   9  14    2.35    1.35
 -18   9  14    0.77    1.04
 -18   9  14    1.82    1.25
  18  -9 -14    3.67    1.25
  18  -9 -14    1.89    1.23
  18  -9 -14    2.03    1.41
 -18   9  15    6.07    1.68
 -18   9  15    6.06    1.79
 -18   9  15    3.63    1.45
  18  -9 -15    6.95    1.63
  18  -9 -15    6.48    1.62
 -18   9  16   15.05    2.64
 -18   9  16   18.89    2.77
 -18   9  16   14.52    2.47
 -18   9  16   13.65    2.49
  18  -9 -16   21.08    2.67
  18  -9 -16   19.18    2.67
  18  -9 -16   20.09    2.75
 -18   9  17    9.16    2.09
 -18   9  17    7.54    1.98
 -18   9  17    5.66    1.96
  18  -9 -17   11.94    2.11
  18  -9 -17   10.26    2.12
 -18   9  18    5.50    1.83
 -18   9  18    8.14    1.91
  18  -9 -18    7.89    1.84
 -18   9  19    0.11    0.82
  18  -9 -19    1.22    1.30
 -18   9  20   18.58    2.81
  18  -9 -20   22.18    2.96
 -18  10   1   -0.05    0.95
 -18  10   1    0.48    0.96
 -18  10   1    1.33    0.88
  18 -10  -1    0.65    1.00
 -18  10   2  164.46    9.95
 -18  10   2  150.75    9.86
 -18  10   2  144.81   10.34
 -18  10   2  138.62    9.84
  18 -10  -2  156.13    9.72
  18 -10  -2  169.29   11.37
  18 -10  -2  168.15   11.43
 -18  10   3   -0.17    0.79
 -18  10   3    0.36    0.96
 -18  10   3   -0.11    0.83
  18 -10  -3    1.65    0.98
  18 -10  -3    1.81    1.30
  18 -10  -3   -0.33    1.02
  18 -10  -3    0.77    0.98
 -18  10   4   29.88    3.26
 -18  10   4   31.96    3.60
 -18  10   4   23.13    3.14
  18 -10  -4   30.60    3.43
 -18  10   5    2.55    1.08
 -18  10   5    1.86    1.19
 -18  10   5    1.25    1.13
  18 -10  -5    2.44    1.26
  18 -10  -5    0.41    1.40
  18 -10  -5    2.42    1.16
 -18  10   6   44.20    4.17
 -18  10   6   45.12    4.42
 -18  10   6   41.45    4.26
  18 -10  -6   44.55    4.22
  18 -10  -6   52.74    4.73
 -18  10   7    9.07    1.86
 -18  10   7    7.25    1.88
 -18  10   7    8.33    1.90
  18 -10  -7    9.25    1.89
  18 -10  -7    9.89    1.96
 -18  10   8    1.70    1.18
  18 -10  -8    3.01    1.28
  18 -10  -8    1.64    1.20
 -18  10   9  125.71    8.81
 -18  10   9  127.38    9.38
  18 -10  -9  140.50    8.98
  18 -10  -9  169.18   11.14
  18 -10  -9  161.10   10.93
 -18  10  10   30.31    3.47
 -18  10  10   27.86    3.39
 -18  10  10   23.76    3.04
 -18  10  10   25.89    3.29
  18 -10 -10   34.24    3.44
  18 -10 -10   33.89    3.47
  18 -10 -10   33.95    3.62
 -18  10  11  182.01   11.48
 -18  10  11  202.82   12.26
 -18  10  11  177.88   12.32
 -18  10  11  198.43   13.28
  18 -10 -11  218.54   12.44
  18 -10 -11  243.90   15.34
  18 -10 -11  242.71   15.40
 -18  10  12   14.54    2.50
 -18  10  12   17.95    2.61
 -18  10  12   12.27    2.22
 -18  10  12   13.67    2.42
  18 -10 -12   18.22    2.45
  18 -10 -12   19.75    2.53
  18 -10 -12   18.71    2.59
 -18  10  13  142.65    9.50
 -18  10  13  154.55    9.92
 -18  10  13  124.60    9.29
  18 -10 -13  148.35    9.33
  18 -10 -13  173.37   11.48
 -18  10  14   35.20    3.86
 -18  10  14   37.74    3.93
 -18  10  14   26.63    3.39
 -18  10  14   30.59    3.59
  18 -10 -14   41.68    3.87
  18 -10 -14   40.35    3.95
  18 -10 -14   40.50    4.00
 -18  10  15  118.39    8.38
 -18  10  15  101.01    7.98
 -18  10  15  106.48    8.20
  18 -10 -15  142.88    9.89
  18 -10 -15  137.43    9.62
 -18  10  16   53.33    5.26
 -18  10  16   64.16    5.68
  18 -10 -16   80.01    5.90
  18 -10 -16   83.44    6.55
  18 -10 -16   86.09    6.61
 -18  10  17   59.24    5.41
  18 -10 -17   71.89    5.68
  18 -10 -17   77.66    6.25
 -18  10  18  133.03    9.17
  18 -10 -18  181.93   10.75
 -18  10  19    0.03    0.72
  18 -10 -19   -1.25    1.12
 -18  11   1    1.28    1.28
 -18  11   1    2.84    1.10
  18 -11  -1    3.12    1.22
  18 -11  -1    1.85    1.35
 -18  11   2  341.53   18.79
 -18  11   2  324.66   20.27
  18 -11  -2  332.95   18.01
  18 -11  -2  411.74   24.70
 -18  11   3    5.15    1.45
 -18  11   3    6.16    1.70
 -18  11   3    2.43    1.36
 -18  11   3    4.94    1.39
  18 -11  -3    5.82    1.55
  18 -11  -3    6.68    1.57
  18 -11  -3    3.76    1.45
 -18  11   4  379.77   20.14
 -18  11   4  390.67   20.94
 -18  11   4  348.57   21.95
 -18  11   4  349.03   21.78
  18 -11  -4  375.89   19.91
  18 -11  -4  461.98   27.40
  18 -11  -4  454.94   27.22
 -18  11   5   65.16    5.40
 -18  11   5   75.48    5.97
 -18  11   5   60.98    5.55
 -18  11   5   60.22    5.31
  18 -11  -5   73.24    5.62
  18 -11  -5   86.26    6.49
  18 -11  -5   77.27    6.23
 -18  11   6  249.91   14.40
 -18  11   6  215.34   14.46
 -18  11   6  215.55   14.32
  18 -11  -6  245.32   13.84
  18 -11  -6  269.66   16.91
  18 -11  -6  275.76   17.37
 -18  11   7  203.45   12.36
 -18  11   7  191.31   13.04
 -18  11   7  179.68   12.44
  18 -11  -7  224.14   12.73
  18 -11  -7  229.56   14.66
  18 -11  -7  237.92   15.28
 -18  11   8  110.94    7.95
 -18  11   8  137.20    8.98
 -18  11   8  115.76    8.71
  18 -11  -8  118.58    7.96
  18 -11  -8  147.36    9.99
  18 -11  -8  143.84    9.99
 -18  11   9  214.74   12.69
 -18  11   9  227.29   13.28
 -18  11   9  178.01   12.58
  18 -11  -9  222.84   12.73
  18 -11  -9  253.72   15.91
 -18  11  10   11.18    2.24
 -18  11  10   12.35    2.30
 -18  11  10   11.66    2.06
  18 -11 -10   13.30    2.22
  18 -11 -10   18.10    2.35
  18 -11 -10   16.53    2.41
 -18  11  11  132.13    8.83
 -18  11  11  135.51    8.99
 -18  11  11  101.97    8.09
 -18  11  11  106.10    8.35
  18 -11 -11  152.11    9.20
  18 -11 -11  154.58   10.38
  18 -11 -11  150.93   10.33
 -18  11  12    1.04    0.93
 -18  11  12    0.62    1.09
 -18  11  12    0.56    0.79
 -18  11  12    0.74    1.16
  18 -11 -12    0.79    0.92
  18 -11 -12    0.87    1.00
  18 -11 -12    0.26    1.24
 -18  11  13   74.94    6.04
 -18  11  13   79.19    6.19
 -18  11  13   59.65    5.51
 -18  11  13   59.49    5.60
  18 -11 -13   78.74    5.85
  18 -11 -13   87.78    6.67
  18 -11 -13   84.82    6.63
 -18  11  14    1.56    1.10
 -18  11  14    0.50    1.05
 -18  11  14    0.86    1.03
 -18  11  14    0.56    1.16
  18 -11 -14    1.38    1.27
  18 -11 -14    3.43    1.23
  18 -11 -14    1.64    1.27
 -18  11  15    3.57    1.42
 -18  11  15    4.35    1.60
  18 -11 -15    5.95    1.66
  18 -11 -15    6.44    1.70
 -18  11  16    0.75    1.08
 -18  11  16    1.66    1.07
 -18  11  16    1.54    1.23
  18 -11 -16    0.84    1.07
  18 -11 -16    0.91    1.16
  18 -11 -16    1.00    1.26
 -18  11  17   27.85    3.49
  18 -11 -17   35.43    3.80
  18 -11 -17   39.31    4.03
 -18  11  18    1.36    1.12
  18 -11 -18    0.34    1.11
 -18  12   1   16.78    2.71
 -18  12   1   15.83    2.56
 -18  12   1   16.71    2.41
  18 -12  -1   19.71    2.64
  18 -12  -1   19.82    2.66
  18 -12  -1   18.14    2.63
 -18  12   2  213.57   12.75
 -18  12   2  186.58   12.86
 -18  12   2  182.46   12.40
  18 -12  -2  224.70   12.74
  18 -12  -2  235.17   15.36
 -18  12   3   -0.09    0.86
 -18  12   3   -0.15    0.90
 -18  12   3    0.37    0.86
  18 -12  -3    1.15    0.93
  18 -12  -3    0.17    0.93
  18 -12  -3   -0.81    0.92
 -18  12   4   15.68    2.49
  18 -12  -4   14.11    2.35
 -18  12   5    0.52    0.86
 -18  12   5    0.43    1.02
 -18  12   5   -0.40    0.96
 -18  12   5    0.21    0.73
  18 -12  -5    0.34    0.87
  18 -12  -5    0.72    1.01
  18 -12  -5    0.52    1.07
 -18  12   6    1.02    1.00
 -18  12   6    1.85    1.12
 -18  12   6    1.11    1.14
 -18  12   6    0.78    0.85
  18 -12  -6    2.03    1.17
  18 -12  -6    2.03    1.13
  18 -12  -6    1.24    1.27
 -18  12   7   11.23    2.16
 -18  12   7   10.80    2.19
 -18  12   7   12.17    2.28
 -18  12   7   11.98    2.03
  18 -12  -7   12.85    2.21
  18 -12  -7   19.77    2.45
  18 -12  -7   16.17    2.39
 -18  12   8    1.42    1.06
 -18  12   8    2.45    1.19
 -18  12   8    1.71    1.21
 -18  12   8    2.42    1.01
  18 -12  -8    1.31    1.12
  18 -12  -8    2.44    1.24
  18 -12  -8    1.93    1.23
 -18  12   9  117.65    8.14
 -18  12   9  116.27    8.16
 -18  12   9  101.93    8.04
 -18  12   9  110.98    8.42
  18 -12  -9  117.16    7.86
  18 -12  -9  143.86    9.77
  18 -12  -9  140.69    9.76
 -18  12  10    1.10    1.17
 -18  12  10    3.46    1.29
 -18  12  10    1.83    1.02
 -18  12  10    2.29    1.29
  18 -12 -10    2.75    1.22
  18 -12 -10    3.48    1.26
  18 -12 -10    3.12    1.34
 -18  12  11   99.61    7.43
 -18  12  11  108.15    7.69
 -18  12  11   86.52    7.13
 -18  12  11  101.07    7.81
  18 -12 -11  111.93    7.49
  18 -12 -11  128.65    8.93
  18 -12 -11  123.11    8.79
 -18  12  12   31.13    3.59
 -18  12  12   25.50    3.24
 -18  12  12   28.98    3.48
  18 -12 -12   39.30    3.80
  18 -12 -12   39.48    3.90
 -18  12  13  140.58    9.42
 -18  12  13  153.00    9.80
 -18  12  13  127.53    9.49
  18 -12 -13  146.07    9.21
  18 -12 -13  165.96   11.25
 -18  12  14    1.61    1.22
 -18  12  14    1.28    1.03
 -18  12  14    1.44    1.22
  18 -12 -14    1.14    1.05
  18 -12 -14    1.75    1.17
  18 -12 -14    1.95    1.31
 -18  12  15  200.37   12.08
 -18  12  15  170.84   12.06
 -18  12  15  184.00   12.69
  18 -12 -15  223.07   12.64
  18 -12 -15  238.04   15.23
 -18  12  16   31.42    3.70
 -18  12  16   31.30    3.69
 -18  12  16   31.54    3.74
  18 -12 -16   45.96    4.10
  18 -12 -16   42.43    4.19
  18 -12 -16   39.41    4.04
 -18  12  17  128.41    9.00
  18 -12 -17  157.70   11.01
  18 -12 -17  156.05   10.78
 -18  13   1   33.52    3.88
 -18  13   1   36.16    3.92
 -18  13   1   38.60    3.83
  18 -13  -1   35.83    3.76
  18 -13  -1   45.21    4.24
  18 -13  -1   38.37    4.06
 -18  13   2  242.58   14.04
 -18  13   2  228.37   15.10
 -18  13   2  232.54   15.02
  18 -13  -2  245.66   13.82
 -18  13   3   20.13    2.89
 -18  13   3   18.55    2.75
 -18  13   3   19.86    2.62
  18 -13  -3   18.32    2.65
  18 -13  -3   21.88    2.82
  18 -13  -3   23.28    2.93
 -18  13   4  333.21   18.19
 -18  13   4  354.21   19.15
 -18  13   4  301.20   19.41
 -18  13   4  302.82   19.23
  18 -13  -4  341.89   18.26
  18 -13  -4  377.27   22.95
  18 -13  -4  378.16   23.18
 -18  13   5    3.32    1.25
 -18  13   5    2.62    1.28
 -18  13   5    2.50    1.37
 -18  13   5    2.25    1.07
  18 -13  -5    2.20    1.19
  18 -13  -5    2.99    1.29
  18 -13  -5    3.72    1.44
 -18  13   6  289.69   16.36
 -18  13   6  317.61   17.54
 -18  13   6  312.72   19.76
 -18  13   6  276.91   17.87
  18 -13  -6  322.16   17.30
  18 -13  -6  354.74   21.63
  18 -13  -6  339.60   21.03
 -18  13   7   52.17    4.66
 -18  13   7   46.58    4.61
 -18  13   7   44.57    4.54
 -18  13   7   44.73    4.37
  18 -13  -7   55.89    4.63
  18 -13  -7   53.27    4.80
  18 -13  -7   50.98    4.80
 -18  13   8  289.00   16.14
 -18  13   8  282.77   16.01
 -18  13   8  258.53   16.89
 -18  13   8  249.36   16.78
  18 -13  -8  289.54   15.86
  18 -13  -8  337.63   20.60
  18 -13  -8  332.74   20.48
 -18  13   9   72.93    5.86
 -18  13   9   67.32    5.71
 -18  13   9   59.73    5.46
 -18  13   9   61.95    5.62
  18 -13  -9   79.76    5.80
  18 -13  -9   78.97    6.21
  18 -13  -9   69.99    5.95
 -18  13  10  114.17    7.98
 -18  13  10   85.25    7.13
  18 -13 -10  112.60    8.29
 -18  13  11  105.85    7.63
 -18  13  11  113.52    7.84
 -18  13  11   86.65    7.18
 -18  13  11   95.16    7.62
  18 -13 -11  120.67    7.81
  18 -13 -11  118.75    8.51
  18 -13 -11  116.22    8.53
 -18  13  12   33.75    3.82
 -18  13  12   33.93    3.71
 -18  13  12   25.21    3.27
 -18  13  12   26.15    3.47
  18 -13 -12   34.36    3.50
  18 -13 -12   37.29    3.74
  18 -13 -12   35.33    3.75
 -18  13  13  101.81    7.35
 -18  13  13   77.08    6.70
  18 -13 -13  117.13    7.58
  18 -13 -13  120.42    8.56
 -18  13  14   13.92    2.33
 -18  13  14   11.10    2.12
 -18  13  14    9.52    2.24
  18 -13 -14   15.50    2.37
  18 -13 -14   13.52    2.29
  18 -13 -14   16.19    2.47
 -18  13  15    5.04    1.46
 -18  13  15    2.78    1.29
 -18  13  15    2.60    1.46
  18 -13 -15    4.60    1.58
  18 -13 -15    5.08    1.53
  18 -13 -15    2.53    1.53
 -18  13  16    0.36    0.99
 -18  13  16   -0.15    1.18
  18 -13 -16    0.83    1.11
  18 -13 -16    1.68    1.29
 -18  14   1   91.86    6.89
 -18  14   1   85.07    6.95
 -18  14   1   78.05    6.44
  18 -14  -1   96.44    6.79
  18 -14  -1   91.41    7.16
  18 -14  -1   97.63    7.54
 -18  14   2   55.99    4.94
 -18  14   2   41.02    4.43
  18 -14  -2   53.01    4.59
 -18  14   3   61.91    5.31
 -18  14   3   52.34    5.06
  18 -14  -3   61.24    5.02
  18 -14  -3   58.27    5.33
 -18  14   4    3.63    1.42
 -18  14   4    0.84    1.20
  18 -14  -4    1.95    1.15
  18 -14  -4    1.73    1.30
 -18  14   5   16.41    2.37
 -18  14   5   13.22    2.33
 -18  14   5   10.36    2.24
  18 -14  -5   13.70    2.23
  18 -14  -5   11.62    2.26
 -18  14   6    1.19    1.02
 -18  14   6    1.85    1.22
 -18  14   6    0.91    1.14
  18 -14  -6    1.44    1.07
  18 -14  -6    0.80    1.15
  18 -14  -6    1.45    1.05
 -18  14   7   21.37    3.02
 -18  14   7   25.98    3.24
 -18  14   7   20.77    3.04
 -18  14   7   22.80    2.91
  18 -14  -7   25.40    3.00
  18 -14  -7   28.89    3.25
  18 -14  -7   27.28    3.26
 -18  14   8   12.35    2.44
 -18  14   8   18.61    2.64
 -18  14   8   15.00    2.35
  18 -14  -8   20.36    2.66
  18 -14  -8   19.33    2.71
 -18  14   9   32.33    3.67
 -18  14   9   31.72    3.56
 -18  14   9   24.73    3.12
 -18  14   9   23.41    3.26
  18 -14  -9   28.70    3.23
  18 -14  -9   32.51    3.49
  18 -14  -9   32.57    3.56
 -18  14  10   56.12    5.22
 -18  14  10   59.30    5.27
 -18  14  10   53.26    5.09
 -18  14  10   62.34    5.58
  18 -14 -10   66.80    5.26
  18 -14 -10   77.75    6.07
  18 -14 -10   82.82    6.57
 -18  14  11   58.80    5.12
 -18  14  11   48.15    4.74
  18 -14 -11   57.34    4.83
  18 -14 -11   63.64    5.39
  18 -14 -11   62.84    5.48
 -18  14  12   74.82    5.97
 -18  14  12   63.07    5.69
 -18  14  12   64.44    5.87
  18 -14 -12   75.70    5.78
  18 -14 -12   84.92    6.57
  18 -14 -12   89.13    6.88
 -18  14  13  137.13    9.29
 -18  14  13  132.51    9.84
 -18  14  13  143.42   10.36
  18 -14 -13  173.37   10.31
  18 -14 -13  179.48   11.94
  18 -14 -13  180.86   12.07
 -18  14  14   17.59    2.86
 -18  14  14   17.49    2.66
 -18  14  14   19.52    2.86
  18 -14 -14   23.24    2.90
  18 -14 -14   25.19    3.02
  18 -14 -14   21.19    2.89
 -18  14  15  179.03   12.43
  18 -14 -15  229.97   14.84
  18 -14 -16    1.37    1.15
  18 -14 -16    1.45    1.33
 -18  15   1  104.95    7.57
 -18  15   1   95.96    7.36
  18 -15  -1   98.66    7.06
  18 -15  -1  111.90    8.23
 -18  15   2  210.35   12.55
 -18  15   2  181.36   12.66
 -18  15   2  177.90   12.16
  18 -15  -2  205.71   12.02
  18 -15  -2  228.92   14.72
  18 -15  -2  207.67   13.92
 -18  15   3  104.70    7.61
 -18  15   3  101.93    7.99
 -18  15   3   97.01    7.44
  18 -15  -3  105.82    7.31
  18 -15  -3  116.49    8.45
  18 -15  -3  112.12    8.45
 -18  15   4  274.55   15.59
 -18  15   4  248.00   16.42
 -18  15   4  248.17   16.14
  18 -15  -4  278.66   15.35
  18 -15  -4  321.20   19.77
  18 -15  -4  289.19   18.40
 -18  15   5   48.26    4.73
 -18  15   5   47.99    4.82
 -18  15   5   53.92    4.77
  18 -15  -5   65.41    5.41
  18 -15  -5   59.03    5.40
 -18  15   6  275.01   15.54
 -18  15   6  273.40   15.49
 -18  15   6  236.40   15.60
  18 -15  -6  268.67   14.91
  18 -15  -6  291.24   18.25
 -18  15   7    0.98    1.01
 -18  15   7    1.35    1.02
 -18  15   7   -0.12    0.81
  18 -15  -7   -0.57    0.93
  18 -15  -7    0.84    1.11
 -18  15   8  297.51   16.88
 -18  15   8  315.82   17.44
 -18  15   8  289.22   18.67
 -18  15   8  283.57   18.69
  18 -15  -8  334.29   17.77
  18 -15  -8  355.63   21.74
  18 -15  -8  368.91   22.55
 -18  15   9   17.55    2.60
 -18  15   9   12.43    2.27
 -18  15   9   12.85    2.49
  18 -15  -9   18.85    2.49
  18 -15  -9   17.81    2.53
  18 -15  -9   18.06    2.62
 -18  15  10  130.20    9.73
 -18  15  10  127.03    9.58
  18 -15 -10  154.20    9.49
  18 -15 -10  174.08   11.56
  18 -15 -10  164.42   11.24
 -18  15  11   18.01    2.64
 -18  15  11   14.14    2.34
 -18  15  11   13.03    2.60
  18 -15 -11   20.57    2.57
  18 -15 -11   18.26    2.57
  18 -15 -11   17.63    2.65
 -18  15  12   75.11    6.05
 -18  15  12   63.54    5.79
 -18  15  12   68.76    6.09
  18 -15 -12   92.10    6.43
  18 -15 -12   88.31    6.78
  18 -15 -12   93.06    7.10
 -18  15  13   14.70    2.56
  18 -15 -13   18.14    2.63
 -18  15  14   47.92    4.77
  18 -15 -14   57.63    5.11
  18 -15 -14   58.51    5.26
 -18  15  15    1.09    1.08
  18 -15 -15    1.47    1.11
  18 -15 -15    0.63    1.29
 -18  16   1   51.47    4.99
 -18  16   1   52.70    4.75
  18 -16  -1   58.51    5.28
 -18  16   2    2.86    1.36
 -18  16   2    1.23    1.07
  18 -16  -2    2.85    1.35
  18 -16  -2    2.52    1.35
 -18  16   3   26.42    3.12
 -18  16   3   16.55    2.79
 -18  16   3   18.28    2.54
  18 -16  -3   23.32    2.84
 -18  16   4    6.40    1.68
 -18  16   4    4.64    1.65
 -18  16   4    5.50    1.44
  18 -16  -4    5.52    1.59
  18 -16  -4    8.64    1.76
  18 -16  -4    5.08    1.65
 -18  16   5    3.68    1.42
 -18  16   5    2.63    1.30
 -18  16   5    3.04    1.13
  18 -16  -5    4.55    1.44
  18 -16  -5    3.39    1.41
  18 -16  -5    2.50    1.40
 -18  16   6    2.61    1.16
 -18  16   6    1.54    1.22
 -18  16   6    2.15    1.01
  18 -16  -6    0.89    1.08
  18 -16  -6    0.45    1.35
  18 -16  -6    1.68    1.12
 -18  16   7   16.93    2.61
 -18  16   7   16.07    2.67
 -18  16   7   16.06    2.40
  18 -16  -7   19.32    2.58
  18 -16  -7   18.31    2.66
  18 -16  -7   20.15    2.80
 -18  16   8    3.08    1.36
 -18  16   8    3.50    1.39
 -18  16   8    4.57    1.29
  18 -16  -8    2.80    1.39
  18 -16  -8    3.67    1.57
  18 -16  -8    3.02    1.46
 -18  16   9    0.24    1.04
 -18  16   9    1.43    1.19
  18 -16  -9    0.47    1.11
  18 -16  -9    1.39    1.18
 -18  16  10   92.43    7.00
 -18  16  10   98.19    7.76
 -18  16  10   92.63    7.47
  18 -16 -10  103.79    7.11
  18 -16 -10  116.43    8.48
 -18  16  11    3.66    1.33
 -18  16  11    2.03    1.71
  18 -16 -11    6.18    1.51
  18 -16 -11    4.66    1.62
 -18  16  12   77.74    6.60
  18 -16 -12   96.60    7.32
  18 -16 -12   93.66    7.35
 -18  16  13   76.73    6.50
  18 -16 -13   93.72    7.15
  18 -16 -13   84.08    6.85
 -18  16  14   50.81    4.94
  18 -16 -14   60.26    5.27
  18 -16 -14   60.64    5.34
 -18  17   1  165.84   10.38
 -18  17   1  136.56   10.02
 -18  17   1  141.00    9.93
 -18  17   2   91.38    6.71
 -18  17   2   76.91    6.55
 -18  17   2   76.08    6.22
  18 -17  -2   82.88    6.19
  18 -17  -2   83.16    6.73
  18 -17  -2   87.70    6.91
  18 -17  -2   81.03    6.76
 -18  17   3  248.20   14.34
 -18  17   3  218.72   14.79
 -18  17   3  221.82   14.61
  18 -17  -3  239.22   13.61
  18 -17  -3  267.34   16.94
  18 -17  -3  263.98   16.93
 -18  17   4  109.77    7.75
 -18  17   4   97.63    7.84
 -18  17   4   98.05    7.54
  18 -17  -4  114.38    7.63
  18 -17  -4  119.44    8.64
  18 -17  -4  115.14    8.57
 -18  17   5   97.39    7.10
 -18  17   5   84.38    7.04
 -18  17   5   86.00    6.83
  18 -17  -5   95.22    6.75
  18 -17  -5  108.61    7.98
  18 -17  -5   96.86    7.55
 -18  17   6  130.63    8.74
 -18  17   6  117.72    8.98
 -18  17   6  121.95    8.98
  18 -17  -6  136.33    8.66
  18 -17  -6  147.46   10.30
 -18  17   7   23.65    3.05
 -18  17   7   17.49    2.87
  18 -17  -7   24.23    2.96
  18 -17  -7   26.85    3.21
 -18  17   8  141.05    9.33
 -18  17   8  132.42    9.84
  18 -17  -8  150.39    9.37
  18 -17  -8  158.32   10.89
  18 -17  -8  152.98   10.74
  18 -17  -9   15.90    2.50
  18 -17  -9   17.12    2.65
 -18  17  10   99.69    7.94
  18 -17 -10  117.32    8.52
 -18  17  11   -0.62    0.62
  18 -17 -11    0.42    1.00
  18 -17 -11   -0.04    1.09
  18 -17 -12   52.28    4.86
  18 -17 -12   53.76    5.05
 -18  17  13    0.65    0.99
  18 -17 -13    1.28    1.06
  18 -17 -13    0.79    1.06
 -18  18   1   46.76    4.43
 -18  18   1   36.74    3.85
  18 -18  -1   44.56    4.09
  18 -18  -1   38.34    4.13
  18 -18  -1   39.91    4.22
 -18  18   2   10.06    2.21
 -18  18   2   13.31    2.07
  18 -18  -2   12.55    2.21
  18 -18  -2   16.24    2.43
  18 -18  -2   12.42    2.39
 -18  18   3   12.81    2.20
 -18  18   3    9.26    1.77
  18 -18  -3   10.11    2.00
  18 -18  -3    8.69    2.00
  18 -18  -3    8.25    2.09
 -18  18   4    0.41    0.92
 -18  18   4    1.06    0.78
  18 -18  -4    1.21    1.00
  18 -18  -4   -1.25    1.10
  18 -18  -4    0.60    1.09
 -18  18   5    5.97    1.79
 -18  18   5    6.16    1.46
  18 -18  -5    6.49    1.60
  18 -18  -5    5.02    1.66
  18 -18  -5    4.87    1.67
 -18  18   6    0.54    1.13
 -18  18   6    2.01    0.94
  18 -18  -6    0.92    1.06
  18 -18  -6    1.94    1.34
 -18  18   7    0.10    0.76
  18 -18  -7    1.93    1.21
  18 -18  -7    0.63    1.24
 -18  18   8   30.24    3.51
  18 -18  -8   36.65    3.83
  18 -18  -8   37.54    3.90
  18 -18  -9    2.27    1.23
  18 -18  -9    0.26    1.27
 -18  18  10   69.55    6.14
  18 -18 -10   83.92    6.64
  18 -18 -10   85.35    6.80
 -18  18  11    4.14    1.34
  18 -18 -11    2.76    1.33
  18 -18 -11    3.43    1.48
 -18  18  12   55.65    5.23
  18 -18 -12   65.80    5.58
  18 -18 -12   63.35    5.57
 -18  19   1  138.57    9.16
 -18  19   1  125.30    9.09
  18 -19  -1  127.82    8.52
  18 -19  -1  148.12   10.28
  18 -19  -1  138.61   10.03
 -18  19   2    9.83    2.03
 -18  19   2    8.01    1.74
  18 -19  -2   10.06    1.98
  18 -19  -2    8.74    1.94
  18 -19  -2    8.05    1.96
 -18  19   3  242.86   14.06
 -18  19   3  203.44   13.74
  18 -19  -3  229.84   13.25
  18 -19  -3  259.31   16.50
  18 -19  -3  259.50   16.71
 -18  19   4    8.71    1.82
  18 -19  -4   12.34    2.16
  18 -19  -4   11.20    2.13
 -18  19   5  108.04    8.19
  18 -19  -5  123.30    8.94
  18 -19  -5  118.01    8.80
 -18  19   6   60.81    5.36
  18 -19  -6   73.33    5.99
  18 -19  -6   64.27    5.72
 -18  19   7   41.37    4.10
  18 -19  -7   43.17    4.27
  18 -19  -7   37.84    4.13
 -18  19   8   99.80    7.93
  18 -19  -8  113.81    8.42
  18 -19  -8  110.17    8.33
  18 -19  -9    9.26    1.98
 -18  19  10   60.53    5.45
  18 -19 -10   60.79    5.37
  18 -19 -10   60.06    5.43
 -18  19  11    0.48    0.92
 -18  20   1   55.15    5.00
  18 -20  -1   63.73    5.55
  18 -20  -1   67.72    5.80
 -18  20   2    4.57    1.33
  18 -20  -2    3.90    1.59
  18 -20  -2    4.85    1.59
 -18  20   3   25.10    2.96
  18 -20  -3   23.14    3.15
  18 -20  -3   25.44    3.19
  18 -20  -4   21.38    2.96
  18 -20  -5    1.02    1.01
 -18  20   6    1.18    0.89
  18 -20  -6    0.86    1.24
  18 -20  -6   -0.12    1.13
 -18  20   7    5.34    1.53
  18 -20  -7    7.22    1.76
  18 -20  -7    7.29    1.84
 -18  20   8   15.31    2.41
  18 -20  -8   18.03    2.60
 -18  20   9    7.81    1.70
  18 -20  -9    8.59    1.94
 -18  21   1   79.39    6.42
  18 -21  -1   94.43    7.20
 -18  21   2    7.37    1.60
  18 -21  -2    6.65    1.69
 -18  21   3   96.72    7.41
  18 -21  -3  105.89    7.94
 -18  21   4    1.62    0.91
  18 -21  -4    0.31    1.18
 -18  21   5   69.67    5.83
  18 -21  -5   73.60    6.09
 -18  21   6   18.69    2.50
  18 -21  -6   15.26    2.46
 -18  21   7   63.17    5.56
  18 -21  -7   68.39    5.79
 -18  22   1   46.90    4.37
  18 -22  -1   47.42    4.55
 -18  22   2    6.89    1.54
  18 -22  -2    5.01    1.57
 -18  22   3   44.08    4.13
  18 -22  -3   37.74    4.00
 -18  22   4    2.72    1.10
  18 -22  -4    1.28    1.12
  17  18  -5   21.06    3.40
  17  18  -6   29.66    3.89
 -17 -18   7   18.78    3.42
 -17 -18   7   17.20    2.76
  17  18  -7   18.14    3.06
 -17 -18   8    1.44    1.20
 -17 -17   3   -0.19    1.08
  17  17  -3    0.44    1.09
 -17 -17   4   23.47    3.43
  17  17  -4   19.09    3.22
 -17 -17   5    5.80    1.94
  17  17  -5    3.58    1.79
 -17 -17   6   60.98    5.80
 -17 -17   6   55.98    5.07
  17  17  -6   55.32    5.52
 -17 -17   7   44.27    4.83
 -17 -17   7   40.50    4.22
  17  17  -7   39.53    4.60
 -17 -17   8   50.42    5.19
 -17 -17   8   43.71    4.43
  17  17  -8   45.00    4.93
 -17 -17   9  130.30    9.45
 -17 -17   9  124.35    8.62
  17  17  -9  131.87    9.50
 -17 -17  10    3.55    1.86
 -17 -17  10    3.97    1.69
 -17 -16   1   21.39    3.43
  17  16  -1   21.17    3.40
 -17 -16   2   95.95    7.53
  17  16  -2   83.36    7.07
 -17 -16   3    0.45    1.36
  17  16  -3   -0.52    1.27
 -17 -16   4   90.13    7.37
 -17 -16   4   86.34    6.64
  17  16  -4   91.17    7.41
 -17 -16   5   13.74    2.44
 -17 -16   6   39.35    4.51
 -17 -16   6   33.00    3.75
  17  16  -6   34.18    4.30
 -17 -16   7    7.13    2.23
 -17 -16   7    6.84    1.94
  17  16  -7    8.85    2.27
 -17 -16   8   -0.79    1.30
 -17 -16   8    0.45    0.96
  17  16  -8    0.86    1.46
 -17 -16   9    2.35    1.78
 -17 -16   9    1.65    1.32
  17  16  -9    2.03    1.52
 -17 -16  10   -0.44    1.44
 -17 -16  10    0.38    1.11
  17  16 -10    0.89    1.25
 -17 -16  11    2.28    1.69
 -17 -16  11    2.83    1.46
  17  16 -11    2.78    1.74
  17  16 -11    2.36    1.68
 -17 -16  12    3.57    2.04
 -17 -16  12    2.99    1.60
 -17 -15   1    1.09    1.49
  17  15  -1    1.94    1.62
 -17 -15   2   25.01    3.58
  17  15  -2   24.60    3.62
  17  15  -3   10.66    2.48
 -17 -15   4  100.69    7.86
 -17 -15   4   96.96    7.15
  17  15  -4   99.24    7.88
 -17 -15   5   11.03    2.65
 -17 -15   5   13.10    2.29
  17  15  -5   12.32    2.61
  17  15  -6   83.54    7.03
 -17 -15   7   52.41    5.33
  17  15  -7   49.87    5.26
 -17 -15   8   55.85    5.54
 -17 -15   8   45.96    4.49
  17  15  -8   51.05    5.23
 -17 -15   9   48.89    5.24
 -17 -15   9   50.89    4.73
  17  15  -9   56.98    5.09
 -17 -15  10   61.15    5.82
 -17 -15  10   56.23    5.05
  17  15 -10   61.30    5.87
  17  15 -10   63.81    5.47
 -17 -15  11   95.39    7.64
 -17 -15  11   84.36    6.61
  17  15 -11  105.14    8.05
  17  15 -11   91.14    7.01
 -17 -15  12   17.47    3.36
 -17 -15  12   22.07    2.99
  17  15 -12   17.20    3.39
  17  15 -12   24.66    3.23
 -17 -15  13  130.23    9.51
 -17 -14   1   60.09    5.56
 -17 -14   1   57.16    5.03
  17  14  -1   58.63    5.64
 -17 -14   2   55.72    4.95
 -17 -14   3    1.05    1.22
 -17 -14   3    1.08    1.10
 -17 -14   4   76.99    6.46
 -17 -14   4   68.09    5.73
  17  14  -4   85.72    6.92
 -17 -14   5    0.02    1.15
 -17 -14   5   -0.22    0.92
  17  14  -5    0.71    1.22
 -17 -14   6   16.74    2.87
  17  14  -6   15.54    2.95
 -17 -14   7    1.22    1.27
 -17 -14   7    2.63    1.27
  17  14  -7    3.61    1.63
 -17 -14   8    5.05    1.50
  17  14  -8    4.75    1.76
 -17 -14   9    1.86    1.42
 -17 -14   9    3.39    1.32
  17  14  -9    2.16    1.67
  17  14  -9    2.25    1.45
 -17 -14  10    1.26    1.28
 -17 -14  10    0.48    1.04
  17  14 -10   -0.01    1.31
  17  14 -10    3.07    1.43
 -17 -14  11    1.95    1.54
 -17 -14  11    2.68    1.34
  17  14 -11    2.45    1.69
  17  14 -11    4.54    1.69
 -17 -14  12   16.40    3.04
  17  14 -12   18.53    3.23
 -17 -14  13    9.84    2.63
 -17 -14  13   13.34    2.31
  17  14 -13   13.21    2.85
  17  14 -13   14.05    2.46
 -17 -14  14   21.50    2.89
 -17 -13   1   27.72    3.36
  17  13  -1   35.21    4.15
  17  13  -1   34.73    3.53
  17  13  -1   32.31    3.48
 -17 -13   2   24.61    3.24
 -17 -13   2   26.53    3.01
  17  13  -2   24.96    3.41
  17  13  -2   15.53    2.25
 -17 -13   3   31.42    3.84
 -17 -13   3   32.56    3.58
  17  13  -3   36.51    4.24
 -17 -13   4   66.35    5.80
 -17 -13   4   61.17    5.26
  17  13  -4   72.51    6.21
 -17 -13   5    2.09    1.31
 -17 -13   5    0.37    1.16
  17  13  -5    2.90    1.51
  17  13  -6  125.91    9.03
  17  13  -6  124.23    8.65
 -17 -13   7    0.48    0.97
  17  13  -7    0.30    1.15
 -17 -13   8  172.30   11.25
 -17 -13   8  171.30   10.69
  17  13  -8  205.59   12.73
  17  13  -8  195.83   11.80
 -17 -13   9   44.40    4.57
 -17 -13   9   42.75    4.14
  17  13  -9   41.55    4.64
  17  13  -9   41.98    4.32
 -17 -13  10   95.59    7.39
 -17 -13  10   88.49    6.68
  17  13 -10   97.86    7.62
  17  13 -10  106.18    7.48
 -17 -13  11  139.51    9.59
 -17 -13  11  129.03    8.69
  17  13 -11  143.76    9.84
 -17 -13  12   54.26    5.34
 -17 -13  12   55.00    4.95
  17  13 -12   60.50    5.73
  17  13 -12   69.28    5.56
 -17 -13  13  145.87   10.05
 -17 -13  13  138.33    9.21
  17  13 -13  170.20   11.12
  17  13 -13  176.14   10.67
 -17 -13  14    0.83    1.40
 -17 -13  14    0.86    1.12
  17  13 -14    0.95    1.46
  17  13 -14    0.77    1.38
 -17 -13  15   90.52    7.21
 -17 -13  15   83.12    6.37
 -17 -12   1   91.61    7.07
 -17 -12   1   90.07    6.63
 -17 -12   1   74.33    6.12
 -17 -12   1   80.66    6.36
  17  12  -1   99.05    7.57
  17  12  -1   97.60    7.08
  17  12  -1   99.14    7.10
 -17 -12   2   73.32    6.09
 -17 -12   2   63.84    5.43
  17  12  -2   78.90    6.53
 -17 -12   3   23.98    3.29
  17  12  -3   24.83    3.50
 -17 -12   4  135.72    9.31
 -17 -12   4  127.32    8.58
  17  12  -4  148.53    9.97
 -17 -12   5    0.56    1.06
 -17 -12   5    0.86    0.90
  17  12  -5    0.12    1.39
  17  12  -5    0.47    1.16
 -17 -12   6   35.63    3.80
  17  12  -6   42.08    4.54
  17  12  -6   38.58    4.10
 -17 -12   7   14.96    2.66
 -17 -12   7   14.59    2.38
  17  12  -7   17.71    2.90
  17  12  -7   13.71    2.43
 -17 -12   8   23.55    3.21
 -17 -12   8   17.48    2.73
  17  12  -8   26.39    3.50
  17  12  -8   23.79    3.11
 -17 -12   9   10.81    2.32
 -17 -12   9   10.74    2.05
  17  12  -9   11.22    2.49
  17  12  -9   12.51    2.34
 -17 -12  10    6.70    1.85
 -17 -12  10    5.23    1.62
  17  12 -10    8.85    2.16
  17  12 -10    4.24    1.80
 -17 -12  11    0.38    1.12
 -17 -12  11    0.74    1.16
  17  12 -11    0.88    1.44
  17  12 -11    2.08    1.41
 -17 -12  12   42.73    4.51
 -17 -12  12   38.01    3.94
  17  12 -12   46.12    4.86
  17  12 -12   50.76    4.51
 -17 -12  13   10.22    2.11
  17  12 -13   10.61    2.32
 -17 -12  14   50.73    5.05
 -17 -12  14   47.27    4.50
  17  12 -14   54.15    5.33
  17  12 -14   59.86    5.07
 -17 -12  15   32.97    3.96
 -17 -12  15   29.23    3.56
  17  12 -15   36.95    4.30
  17  12 -15   42.68    4.13
 -17 -12  16    1.66    1.29
 -17 -12  16   -0.48    1.10
 -17 -11   1   13.32    2.31
 -17 -11   1   11.73    2.04
 -17 -11   1    8.42    1.60
 -17 -11   1    8.84    1.62
  17  11  -1   14.03    2.52
  17  11  -1   13.05    1.79
 -17 -11   2    1.83    1.34
  17  11  -2    2.39    1.48
 -17 -11   3   25.04    3.30
 -17 -11   3   26.57    3.12
  17  11  -3   22.45    3.45
 -17 -11   4   29.58    3.63
 -17 -11   4   29.39    3.34
  17  11  -4   30.94    4.04
  17  11  -4   30.93    3.63
 -17 -11   5   31.91    3.80
 -17 -11   5   33.79    3.60
  17  11  -5   34.05    4.07
  17  11  -5   34.52    3.75
 -17 -11   6  139.45    9.58
 -17 -11   6  145.79    9.31
  17  11  -6  166.02   10.73
  17  11  -6  152.74    9.73
 -17 -11   7    8.46    2.08
 -17 -11   7   10.87    2.03
  17  11  -7    9.62    2.48
  17  11  -7   13.01    2.31
 -17 -11   8  171.29   10.95
 -17 -11   8  159.64   10.01
  17  11  -8  167.41   10.99
  17  11  -8  184.51   11.12
 -17 -11   9    0.92    1.05
 -17 -11   9    1.27    1.02
  17  11  -9    0.54    1.30
  17  11  -9    1.61    1.29
 -17 -11  10  192.13   12.20
  17  11 -10  222.68   13.53
  17  11 -10  236.93   13.59
 -17 -11  11   63.24    5.59
 -17 -11  11   60.32    5.19
  17  11 -11   76.30    6.31
  17  11 -11   68.96    5.61
 -17 -11  12  106.09    7.88
 -17 -11  12   97.75    7.16
  17  11 -12  128.72    8.96
  17  11 -12  126.93    8.26
 -17 -11  13   89.11    6.66
  17  11 -13   96.27    7.57
  17  11 -13  109.53    7.45
 -17 -11  14    9.04    2.11
 -17 -11  14    8.03    1.89
  17  11 -14    9.43    2.35
  17  11 -14   11.44    2.25
 -17 -11  15  185.55   11.88
 -17 -11  15  183.40   11.23
  17  11 -15  213.72   13.06
  17  11 -15  223.05   12.85
 -17 -11  16   -0.41    0.96
 -17 -11  16    1.01    1.11
  17  11 -16   -1.43    1.24
  17  11 -16    1.11    1.68
 -17 -11  17   92.81    7.30
 -17 -10   1  194.00   12.09
  17  10  -1  208.26   12.82
 -17 -10   2   23.93    3.19
 -17 -10   2   22.03    2.92
  17  10  -2   25.86    3.41
 -17 -10   3  143.58    9.25
  17  10  -3  152.80    9.86
 -17 -10   4   91.23    6.87
 -17 -10   4   78.41    6.12
  17  10  -4   88.12    6.98
  17  10  -4   84.97    6.49
 -17 -10   5   75.09    6.15
 -17 -10   5   66.28    5.54
  17  10  -5   84.85    6.70
  17  10  -5   82.21    6.24
 -17 -10   6  147.94    9.78
 -17 -10   6  139.84    9.11
  17  10  -6  165.16   10.60
  17  10  -6  148.65    9.62
 -17 -10   7    0.34    1.03
 -17 -10   7    0.74    1.03
  17  10  -7    0.99    1.28
  17  10  -7    1.16    1.16
 -17 -10   8  108.31    7.79
 -17 -10   8   98.14    7.09
  17  10  -8  109.80    8.27
  17  10  -8  117.75    8.22
 -17 -10   9   10.59    2.18
  17  10  -9   13.21    2.55
 -17 -10  10   14.02    2.42
 -17 -10  10   10.96    2.16
  17  10 -10   11.31    2.47
  17  10 -10   13.13    2.39
 -17 -10  11    3.51    1.41
 -17 -10  11    2.29    1.33
  17  10 -11    3.12    1.62
  17  10 -11    2.29    1.51
 -17 -10  12   27.32    3.24
  17  10 -12   35.26    3.72
 -17 -10  13    2.52    1.26
 -17 -10  13    1.52    1.12
  17  10 -13    1.50    1.55
  17  10 -13    0.58    1.41
 -17 -10  14   20.29    2.91
 -17 -10  14   17.58    2.63
  17  10 -14   19.23    3.13
  17  10 -14   23.62    3.06
 -17 -10  15   33.37    3.91
 -17 -10  15   30.83    3.54
  17  10 -15   40.04    4.37
  17  10 -15   43.76    4.28
 -17 -10  16    1.55    1.12
 -17 -10  16    0.14    1.10
  17  10 -16    0.93    1.44
  17  10 -16    1.26    1.72
 -17 -10  17  123.86    8.78
  17  10 -17  139.86    9.54
 -17 -10  18    6.19    1.93
 -17 -10  18    3.12    1.53
 -17  -9   1    1.83    1.24
 -17  -9   1    1.68    1.12
  17   9  -1    2.16    1.43
 -17  -9   2    6.91    1.67
  17   9  -2    5.37    1.66
 -17  -9   3   15.33    2.60
 -17  -9   3   18.86    2.53
  17   9  -3   14.77    2.78
  17   9  -3   18.67    2.71
 -17  -9   4   14.69    2.54
 -17  -9   4   14.71    2.32
  17   9  -4   15.27    2.75
  17   9  -4   17.04    2.52
 -17  -9   5   59.97    5.39
 -17  -9   5   63.56    5.23
  17   9  -5   72.85    6.03
  17   9  -5   65.15    5.42
 -17  -9   6   53.35    4.86
 -17  -9   6   52.79    4.61
  17   9  -6   49.76    4.97
  17   9  -6   52.12    4.73
 -17  -9   7  121.17    8.45
 -17  -9   7  112.47    7.82
  17   9  -7  135.38    9.12
  17   9  -7  140.31    8.94
 -17  -9   8  184.70   11.51
  17   9  -8  201.68   12.35
  17   9  -9    9.67    2.32
  17   9  -9   11.82    2.28
 -17  -9  10  334.75   18.75
 -17  -9  10  349.80   18.83
  17   9 -10  428.69   22.48
  17   9 -10  396.46   20.71
 -17  -9  11   44.73    4.39
 -17  -9  11   37.11    3.88
  17   9 -11   48.97    4.37
 -17  -9  12  230.17   13.31
  17   9 -12  247.54   14.67
  17   9 -12  279.22   15.22
 -17  -9  13   58.65    5.14
 -17  -9  13   49.90    4.60
  17   9 -13   60.39    5.42
  17   9 -13   60.99    5.16
 -17  -9  14  100.36    7.66
 -17  -9  14  113.10    7.76
  17   9 -14  141.71    9.33
  17   9 -14  141.06    8.95
 -17  -9  15  194.16   12.12
 -17  -9  15  196.88   11.80
  17   9 -15  226.90   13.45
  17   9 -15  242.65   13.77
 -17  -9  16   62.29    5.54
 -17  -9  16   64.58    5.46
  17   9 -16   82.26    6.52
  17   9 -16   89.82    6.73
  17   9 -17  204.10   12.63
 -17  -9  18    1.69    1.20
 -17  -9  18    2.36    1.27
 -17  -8   1  186.35   11.21
  17   8  -1  191.95   11.60
 -17  -8   2   11.93    2.21
 -17  -8   2   10.36    2.05
  17   8  -2   12.09    2.42
  17   8  -2   12.27    2.21
 -17  -8   3  222.91   13.25
 -17  -8   3  235.87   13.42
  17   8  -3  226.57   13.67
  17   8  -3  249.75   14.12
 -17  -8   4   36.40    3.85
 -17  -8   4   32.65    3.54
  17   8  -4   39.07    4.11
  17   8  -4   31.52    3.64
 -17  -8   5  265.15   15.18
 -17  -8   5  252.86   14.36
  17   8  -5  288.26   16.22
  17   8  -5  274.37   15.35
 -17  -8   6   86.99    6.71
 -17  -8   6   83.54    6.30
  17   8  -6  105.40    7.53
  17   8  -6   94.06    6.82
 -17  -8   7   30.77    3.55
  17   8  -7   30.51    3.72
 -17  -8   8  105.78    7.71
 -17  -8   8  104.60    7.31
  17   8  -8  130.03    8.75
  17   8  -8  121.86    8.06
 -17  -8   9    0.74    0.97
 -17  -8   9    1.40    1.11
  17   8  -9    0.84    1.17
  17   8  -9    2.10    1.29
 -17  -8  10   26.74    3.30
 -17  -8  10   24.34    3.05
  17   8 -10   31.76    3.71
  17   8 -10   30.77    3.40
  17   8 -11    1.82    1.29
 -17  -8  12   26.75    3.28
 -17  -8  12   24.09    3.02
  17   8 -12   25.84    3.47
  17   8 -12   31.73    3.44
 -17  -8  13    2.38    1.03
 -17  -8  13    1.28    1.09
  17   8 -13    0.25    1.31
  17   8 -13   -0.12    1.34
 -17  -8  14    4.10    1.54
 -17  -8  14    6.34    1.66
  17   8 -14    7.63    2.06
  17   8 -14   11.56    2.15
 -17  -8  15   15.28    2.50
 -17  -8  15   13.80    2.41
  17   8 -15   20.04    2.97
  17   8 -15   18.46    2.93
 -17  -8  16   15.74    2.47
 -17  -8  16   12.57    2.36
  17   8 -16   16.11    2.76
  17   8 -16   19.72    3.04
 -17  -8  17   45.35    4.46
 -17  -8  17   43.28    4.41
  17   8 -17   52.51    4.95
  17   8 -17   53.32    5.13
 -17  -8  18   67.94    5.88
  17   8 -18   79.14    6.46
  17   8 -18   81.94    6.73
 -17  -7   1    0.69    0.90
 -17  -7   1    0.49    0.94
  17   7  -1    0.87    1.07
  17   7  -1    0.31    0.96
 -17  -7   2    1.08    0.94
 -17  -7   2    0.86    1.00
  17   7  -2    0.64    1.21
  17   7  -2    1.36    1.00
 -17  -7   3   28.40    3.45
 -17  -7   3   29.04    3.32
  17   7  -3   32.99    3.81
  17   7  -3   35.37    3.64
 -17  -7   4   19.80    2.77
 -17  -7   4   18.45    2.62
  17   7  -4   20.96    2.98
  17   7  -4   19.73    2.77
 -17  -7   5  112.90    8.08
 -17  -7   5  126.68    8.30
  17   7  -5  138.92    9.20
  17   7  -5  141.10    8.96
 -17  -7   6   63.52    5.45
  17   7  -6   71.86    5.94
 -17  -7   7  221.53   13.03
 -17  -7   7  196.15   11.78
  17   7  -7  220.70   13.20
  17   7  -7  244.65   13.67
 -17  -7   8  218.23   12.95
 -17  -7   8  197.73   11.87
  17   7  -8  238.61   13.88
  17   7  -8  240.79   13.55
 -17  -7   9   20.93    2.98
 -17  -7   9   21.78    2.87
  17   7  -9   31.04    3.55
  17   7  -9   30.41    3.27
 -17  -7  10  381.37   20.31
  17   7 -10  456.58   23.27
 -17  -7  11   37.95    3.85
  17   7 -11   40.79    4.36
  17   7 -11   45.18    4.20
 -17  -7  12  326.15   18.19
 -17  -7  12  317.17   17.51
  17   7 -12  389.02   20.65
  17   7 -12  394.25   20.42
 -17  -7  13    2.29    1.14
 -17  -7  13    2.10    1.19
  17   7 -13    2.89    1.53
  17   7 -13    1.44    1.44
 -17  -7  14  290.70   16.62
 -17  -7  14  312.70   17.09
  17   7 -14  365.65   19.62
  17   7 -14  385.80   20.14
 -17  -7  15   76.79    6.14
 -17  -7  15   74.15    5.91
  17   7 -15   95.58    7.04
  17   7 -15   90.43    6.80
 -17  -7  16  157.92   10.33
 -17  -7  16  171.75   10.62
  17   7 -16  192.55   11.75
  17   7 -16  199.20   12.03
  17   7 -17  107.27    7.87
  17   7 -17  111.57    8.08
  17   7 -18   31.61    3.86
  17   7 -19   78.51    6.46
  17   7 -19   76.42    6.57
 -17  -6   1  215.26   12.75
 -17  -6   1  199.48   11.85
  17   6  -1  216.88   12.98
  17   6  -1  209.56   12.39
 -17  -6   2   74.70    6.02
 -17  -6   2   70.69    5.65
  17   6  -2   78.91    6.32
  17   6  -2   81.42    6.12
 -17  -6   3  378.06   20.39
 -17  -6   3  369.97   19.74
  17   6  -3  436.56   22.74
  17   6  -3  394.60   20.86
 -17  -6   4   14.68    2.32
 -17  -6   4   12.39    2.11
  17   6  -4   16.16    2.61
  17   6  -4   11.42    2.19
 -17  -6   5  426.45   22.66
  17   6  -5  479.06   24.84
 -17  -6   6   32.01    3.48
 -17  -6   6   26.54    3.13
  17   6  -6   31.36    3.63
  17   6  -6   26.90    3.27
 -17  -6   7   94.51    6.94
 -17  -6   7   85.81    6.43
  17   6  -7  100.12    7.31
  17   6  -7  102.30    7.08
 -17  -6   8   17.02    2.56
 -17  -6   8   15.87    2.45
  17   6  -8   22.32    2.96
  17   6  -8   16.57    2.58
 -17  -6   9    8.77    1.88
 -17  -6   9    7.20    1.77
  17   6  -9    9.06    2.17
  17   6  -9   10.77    2.01
 -17  -6  10    1.02    1.03
  17   6 -10    2.37    1.27
 -17  -6  11    6.27    1.56
 -17  -6  11    5.10    1.46
  17   6 -11    5.62    1.83
  17   6 -11    6.40    1.79
 -17  -6  12    2.95    1.12
 -17  -6  12    0.91    1.01
  17   6 -12    0.88    1.34
  17   6 -12    2.05    1.45
 -17  -6  13   10.98    2.11
 -17  -6  13   12.26    2.14
  17   6 -13   12.82    2.37
  17   6 -13   13.46    2.41
 -17  -6  14    2.21    1.17
 -17  -6  14    2.62    1.16
  17   6 -14    3.90    1.57
  17   6 -14    1.66    1.62
 -17  -6  15    1.93    1.15
 -17  -6  15    2.91    1.31
  17   6 -15    4.19    1.62
  17   6 -15    5.11    1.88
 -17  -6  16   66.11    5.69
 -17  -6  16   74.89    5.95
  17   6 -16   88.45    6.61
  17   6 -16   86.09    6.78
 -17  -6  17   22.95    3.04
 -17  -6  17   19.32    2.97
  17   6 -17   27.89    3.45
  17   6 -17   30.17    3.78
 -17  -6  18  101.70    7.52
 -17  -6  18  100.56    7.64
  17   6 -18  139.61    9.02
  17   6 -18  133.72    9.10
 -17  -6  19   51.35    4.78
 -17  -6  19   43.71    4.94
  17   6 -19   74.85    5.85
 -17  -5   1   19.36    2.82
 -17  -5   1   20.47    2.69
  17   5  -1   20.54    2.99
  17   5  -1   23.04    2.93
 -17  -5   2   22.87    2.91
 -17  -5   2   18.39    2.67
  17   5  -2   22.50    3.06
  17   5  -2   21.71    2.86
 -17  -5   3  127.75    8.63
 -17  -5   3  122.55    8.18
  17   5  -3  149.37    9.52
  17   5  -3  133.52    8.71
 -17  -5   4   16.69    2.52
  17   5  -4   18.01    2.75
 -17  -5   5  302.88   16.80
 -17  -5   5  293.00   16.09
  17   5  -5  310.04   17.18
  17   5  -5  315.13   17.05
 -17  -5   6   30.11    3.36
 -17  -5   6   25.43    3.06
  17   5  -6   29.76    3.49
  17   5  -6   27.02    3.24
 -17  -5   7  273.13   15.49
 -17  -5   7  267.14   14.91
  17   5  -7  291.34   16.25
  17   5  -7  301.53   16.29
 -17  -5   8   46.52    4.41
 -17  -5   8   42.40    4.10
  17   5  -8   50.47    4.64
  17   5  -8   49.59    4.41
 -17  -5   9  149.75    9.45
  17   5  -9  174.87   10.41
 -17  -5  10  209.48   12.31
  17   5 -10  261.05   14.27
 -17  -5  11  263.63   14.96
 -17  -5  11  257.02   14.31
 -17  -5  12  228.11   13.29
 -17  -5  12  219.50   12.61
 -17  -5  13   11.28    2.15
 -17  -5  13   12.41    2.17
  17   5 -13   16.04    2.44
  17   5 -13   11.99    2.45
 -17  -5  14  263.41   15.26
 -17  -5  14  274.77   15.34
  17   5 -14  296.14   16.50
  17   5 -14  336.83   17.96
 -17  -5  15   29.92    3.65
 -17  -5  15   36.89    3.82
  17   5 -15   45.22    4.26
  17   5 -15   44.83    4.48
 -17  -5  16  131.48    9.01
 -17  -5  16  136.42    9.12
  17   5 -16  171.05   10.47
  17   5 -16  170.35   10.72
 -17  -5  17   19.12    2.74
 -17  -5  17   17.62    2.80
  17   5 -17   24.39    3.12
  17   5 -17   22.68    3.38
 -17  -5  18   82.44    6.46
 -17  -5  18   73.84    6.31
  17   5 -18   97.95    7.09
  17   5 -18  109.23    7.84
 -17  -5  19    9.70    2.01
 -17  -5  19    8.26    2.20
  17   5 -19   14.06    2.47
  17   5 -19    9.34    2.61
  17   5 -20   40.46    4.28
 -17  -4   1  179.30   10.95
 -17  -4   1  161.26   10.06
  17   4  -1  174.26   10.89
  17   4  -1  178.84   10.84
 -17  -4   2  111.75    7.79
 -17  -4   2  106.69    7.38
  17   4  -2  119.83    8.20
  17   4  -2  119.88    7.98
 -17  -4   3  353.88   19.00
  17   4  -3  331.48   18.26
 -17  -4   4   41.04    4.13
  17   4  -4   45.00    4.38
 -17  -4   5  248.10   14.30
 -17  -4   5  267.05   14.70
  17   4  -5  283.05   15.70
  17   4  -5  254.52   14.33
 -17  -4   6    7.45    1.75
 -17  -4   6    6.82    1.76
  17   4  -6    8.99    1.94
  17   4  -6   11.36    1.97
 -17  -4   7   48.21    4.50
 -17  -4   7   42.68    4.12
  17   4  -7   51.00    4.67
  17   4  -7   54.49    4.63
 -17  -4   8    3.04    1.17
 -17  -4   8    3.25    1.23
  17   4  -8    1.81    1.31
  17   4  -8    2.49    1.22
 -17  -4   9    9.38    1.82
  17   4  -9    9.67    2.03
 -17  -4  10    3.05    1.20
  17   4 -10    5.27    1.62
  17   4 -10    3.30    1.48
 -17  -4  11    2.54    1.17
 -17  -4  11    0.95    1.09
  17   4 -11    1.95    1.31
  17   4 -11    3.77    1.44
 -17  -4  12    2.36    1.19
 -17  -4  12    2.57    1.13
  17   4 -12    1.46    1.31
  17   4 -12    0.36    1.20
 -17  -4  13    4.51    1.39
 -17  -4  13    2.41    1.29
  17   4 -13    3.43    1.51
  17   4 -13    3.03    1.72
 -17  -4  14    5.55    1.76
  17   4 -14   10.86    2.10
  17   4 -14    9.89    2.27
 -17  -4  15    8.29    1.93
 -17  -4  15    8.09    1.92
  17   4 -15   12.59    2.24
  17   4 -15   10.24    2.40
 -17  -4  16  125.14    8.81
 -17  -4  16  136.99    9.05
  17   4 -16  145.14    9.41
  17   4 -16  176.66   10.86
 -17  -4  17    3.87    1.42
 -17  -4  17    2.55    1.42
  17   4 -17    4.83    1.67
  17   4 -17    4.19    1.95
 -17  -4  18   73.05    6.14
 -17  -4  18   75.84    6.34
  17   4 -18   88.77    6.69
  17   4 -18  108.20    7.76
 -17  -4  19   13.45    2.41
 -17  -4  19   12.00    2.51
  17   4 -19   17.96    2.74
  17   4 -19   14.90    2.94
  17   4 -20   37.98    4.16
  17   4 -20   42.96    4.66
  17   3  -1    8.37    1.94
  17   3  -1    9.39    1.90
 -17  -3   2   33.51    3.66
 -17  -3   2   32.12    3.48
  17   3  -2   35.60    3.80
  17   3  -2   37.44    3.75
 -17  -3   3   31.77    3.62
  17   3  -3   38.76    3.90
 -17  -3   4    8.96    1.83
 -17  -3   4    7.70    1.74
  17   3  -4    8.53    1.91
  17   3  -4    8.73    1.84
 -17  -3   5  276.82   15.59
 -17  -3   5  263.89   14.73
  17   3  -5  294.78   16.21
  17   3  -5  281.24   15.49
 -17  -3   6   45.75    4.39
 -17  -3   6   47.43    4.22
  17   3  -6   44.02    4.39
  17   3  -6   52.47    4.50
 -17  -3   7  224.87   13.26
 -17  -3   7  225.32   12.85
  17   3  -7  219.01   12.87
  17   3  -7  250.76   13.85
 -17  -3   8   24.39    3.07
 -17  -3   8   23.79    2.85
  17   3  -8   22.68    2.96
 -17  -3   9  270.49   15.06
  17   3  -9  311.10   16.67
 -17  -3  10  150.89    9.56
  17   3 -10  190.93   11.40
  17   3 -10  173.58   10.47
 -17  -3  11  228.65   13.87
 -17  -3  11  240.31   13.60
  17   3 -11  260.88   14.67
  17   3 -11  276.45   15.09
 -17  -3  12  121.84    8.09
  17   3 -12  127.12    8.54
  17   3 -12  146.44    9.21
 -17  -3  13    7.74    1.81
  17   3 -13    8.68    1.97
  17   3 -13   11.78    2.36
 -17  -3  14  186.93   11.30
 -17  -3  14  169.75   11.32
  17   3 -14  209.11   12.25
  17   3 -14  233.61   13.36
 -17  -3  15    7.37    1.78
 -17  -3  15    6.59    1.84
  17   3 -15    8.16    1.92
  17   3 -15    5.80    2.19
 -17  -3  16  118.80    8.29
 -17  -3  16  115.04    8.44
  17   3 -16  140.42    9.02
  17   3 -16  149.01    9.70
 -17  -3  17    0.15    0.90
 -17  -3  17   -0.01    0.89
  17   3 -17    0.99    1.30
  17   3 -17    0.12    1.43
 -17  -3  18  109.85    8.22
 -17  -3  18  113.82    8.40
  17   3 -18  150.05    9.43
  17   3 -18  150.35    9.86
 -17  -3  19    2.51    1.38
 -17  -3  19    5.30    1.65
  17   3 -19    4.10    1.72
  17   3 -19    3.78    1.86
 -17  -3  20   45.33    4.89
 -17  -3  20   50.69    5.00
  17   3 -20   58.05    5.09
  17   3 -20   69.70    5.96
 -17  -3  21   19.56    3.34
 -17  -3  21   25.00    3.38
  17   3 -21   34.00    3.72
  17   3 -21   32.68    4.15
 -17  -2   1   62.03    5.16
 -17  -2   1   55.14    4.74
  17   2  -1   57.35    5.09
  17   2  -1   58.39    4.99
 -17  -2   2  184.41   11.43
  17   2  -2  211.48   12.35
 -17  -2   3  304.95   16.88
 -17  -2   3  296.59   16.17
  17   2  -3  331.03   17.78
  17   2  -3  290.70   16.02
 -17  -2   4   63.22    5.30
 -17  -2   4   53.60    4.72
  17   2  -4   62.83    5.25
  17   2  -4   63.59    5.14
 -17  -2   5  156.54   10.02
 -17  -2   5  140.68    9.09
  17   2  -5  179.12   10.70
  17   2  -5  164.46    9.99
 -17  -2   6   29.44    3.49
 -17  -2   6   29.28    3.27
  17   2  -6   35.95    3.72
  17   2  -6   36.56    3.61
 -17  -2   7   18.09    2.62
 -17  -2   7   14.89    2.36
  17   2  -7   23.66    2.87
  17   2  -7   18.29    2.59
 -17  -2   8    5.69    1.48
  17   2  -8    6.90    1.73
 -17  -2   9   18.92    2.57
  17   2  -9   22.63    2.87
 -17  -2  10   24.05    2.93
  17   2 -10   28.24    3.22
 -17  -2  11    6.65    1.60
  17   2 -11    9.39    1.91
  17   2 -11    5.38    1.89
 -17  -2  12   19.61    2.68
 -17  -2  12   18.39    2.86
  17   2 -12   23.36    2.96
  17   2 -12   25.75    3.17
 -17  -2  13    5.10    1.55
 -17  -2  13    4.23    1.61
  17   2 -13    7.55    1.78
  17   2 -13    6.03    1.99
 -17  -2  14   27.69    3.22
 -17  -2  14   24.33    3.28
  17   2 -14   27.80    3.34
  17   2 -14   31.72    3.73
  17   2 -15   11.89    2.24
  17   2 -15    9.98    2.36
 -17  -2  16  126.43    8.75
 -17  -2  16  122.53    8.78
  17   2 -16  167.81   10.14
  17   2 -16  163.94   10.37
 -17  -2  17    3.92    1.57
 -17  -2  17    5.24    1.65
  17   2 -17    6.19    1.76
  17   2 -17    7.26    2.12
 -17  -2  18   97.77    7.56
 -17  -2  18   95.91    7.45
  17   2 -18  132.72    8.55
  17   2 -18  126.98    8.85
 -17  -2  19    3.50    1.54
 -17  -2  19    4.76    1.65
  17   2 -19    4.49    1.71
  17   2 -19    4.61    1.91
 -17  -2  20   68.98    6.41
 -17  -2  20   81.78    6.65
  17   2 -20  105.96    7.35
  17   2 -20  106.50    7.85
 -17  -2  21   30.57    4.12
 -17  -2  21   34.93    4.09
  17   2 -21   49.51    4.48
  17   2 -21   48.90    4.86
 -17  -1   1    0.87    0.96
 -17  -1   1    2.06    1.06
 -17  -1   1    2.15    0.68
 -17  -1   1    1.62    0.66
  17   1  -1    0.52    1.10
  17   1  -1    3.23    0.81
  17   1  -1    1.96    0.77
 -17  -1   2    1.95    1.23
  17   1  -2    3.81    1.28
  17   1  -3    8.86    1.91
  17   1  -3    9.21    1.90
 -17  -1   4   47.16    4.54
 -17  -1   4   48.85    4.36
  17   1  -4   55.37    4.79
  17   1  -4   54.56    4.63
 -17  -1   5   94.19    7.06
 -17  -1   5   98.60    6.80
 -17  -1   6   93.67    6.72
 -17  -1   6  101.43    7.60
  17   1  -6  111.05    7.53
  17   1  -6  107.44    7.27
  17   1  -7  165.88   10.19
  17   1  -7  157.99    9.80
 -17  -1   8    2.53    1.10
 -17  -1   8    2.19    1.35
  17   1  -8    2.93    1.41
 -17  -1   9  550.27   27.81
  17   1  -9  612.31   30.34
 -17  -1  10    8.35    1.75
  17   1 -10   11.23    2.06
 -17  -1  11  226.68   13.06
  17   1 -11  268.58   14.85
 -17  -1  12   40.23    3.99
  17   1 -12   53.85    4.74
 -17  -1  13   99.04    7.03
  17   1 -13  110.66    7.81
 -17  -1  14  237.28   13.75
  17   1 -14  273.73   15.47
 -17  -1  15   32.56    3.64
  17   1 -15   35.54    4.09
 -17  -1  16  297.20   16.83
  17   1 -16  358.67   19.43
 -17  -1  17    3.97    1.51
  17   1 -17    4.70    2.01
 -17  -1  18  152.62   10.30
  17   1 -18  190.66   11.91
 -17  -1  19   10.92    2.33
 -17  -1  19   12.25    2.38
  17   1 -19   14.75    2.83
 -17  -1  20   58.59    5.74
 -17  -1  20   69.22    5.90
  17   1 -20   93.20    7.13
 -17  -1  21   36.02    4.35
 -17  -1  21   37.99    4.19
  17   1 -21   48.03    4.97
 -17   0   1    7.14    1.64
 -17   0   1    4.02    1.05
 -17   0   1    5.11    1.06
  17   0  -1    3.61    1.14
 -17   0   2  287.98   16.53
 -17   0   2  312.49   16.84
  17   0  -2  310.24   17.00
  17   0  -2  330.38   17.58
  17   0  -3   85.82    6.35
  17   0  -3   79.80    6.05
 -17   0   4  311.40   16.94
 -17   0   4  329.15   18.57
  17   0  -4  344.26   18.37
  17   0  -4  343.87   18.19
 -17   0   5   93.15    6.63
 -17   0   5   91.36    7.06
  17   0  -5  107.63    7.33
  17   0  -5  104.58    7.09
 -17   0   6  115.45    7.90
 -17   0   6  133.30    9.05
  17   0  -6  145.52    9.10
  17   0  -6  143.94    8.94
 -17   0   7  200.20   11.86
 -17   0   7  218.66   13.11
  17   0  -7  234.26   13.29
  17   0  -7  244.69   13.57
 -17   0   8    9.68    1.84
 -17   0   8    9.75    2.03
  17   0  -8    9.32    1.95
  17   0  -8    7.44    1.87
 -17   0   9  131.64    8.50
 -17   0   9  134.22    9.11
  17   0  -9  149.96    9.30
 -17   0  10   25.51    2.96
  17   0 -10   26.37    3.27
 -17   0  11   21.29    2.70
  17   0 -11   20.82    3.01
 -17   0  12   27.82    3.22
  17   0 -12   31.36    3.65
 -17   0  13    3.63    1.34
 -17   0  13    5.48    1.62
  17   0 -13    3.54    1.86
 -17   0  14    8.70    1.92
 -17   0  14    8.52    2.06
  17   0 -14   11.94    2.49
 -17   0  15   11.34    2.24
 -17   0  15   10.43    2.27
  17   0 -15   15.72    2.44
  17   0 -15   14.71    2.81
 -17   0  16   41.64    4.30
 -17   0  16   39.57    4.35
  17   0 -16   48.20    4.46
  17   0 -16   49.38    4.87
 -17   0  17   24.69    3.41
 -17   0  17   30.34    3.60
  17   0 -17   34.27    3.64
  17   0 -17   30.05    3.92
 -17   0  18   88.47    7.07
 -17   0  18   81.54    6.66
  17   0 -18   92.00    6.84
  17   0 -18  110.89    8.09
 -17   0  19    6.35    1.90
 -17   0  19    7.98    1.98
  17   0 -19    8.26    2.01
  17   0 -19    8.70    2.36
 -17   0  20  141.69   10.13
 -17   0  20  149.48   10.09
  17   0 -20  177.32   10.85
  17   0 -20  196.18   12.14
 -17   0  21    2.32    1.31
 -17   0  21    1.18    1.35
  17   0 -21    2.34    1.44
  17   0 -21   -0.51    1.53
 -17   0  22  205.15   12.64
 -17   1   1    0.92    0.98
 -17   1   1    1.08    0.63
 -17   1   1    1.06    0.62
  17  -1  -1    1.10    1.16
  17  -1  -1    1.04    0.77
  17  -1  -1    1.32    0.68
  17  -1  -2    4.71    1.43
  17  -1  -2    2.12    1.37
  17  -1  -2    1.67    0.85
  17  -1  -2    2.83    0.83
 -17   1   3    5.30    1.34
 -17   1   3    3.76    1.43
  17  -1  -3    3.63    1.38
  17  -1  -3    3.64    1.46
 -17   1   4   26.64    3.12
 -17   1   4   26.34    3.37
  17  -1  -4   29.74    3.31
  17  -1  -4   32.35    3.32
 -17   1   5   29.00    3.19
 -17   1   5   25.54    3.32
  17  -1  -5   33.97    3.55
  17  -1  -5   34.99    3.51
 -17   1   6   94.54    6.72
 -17   1   6   96.69    7.27
  17  -1  -6  108.00    7.40
  17  -1  -6  111.66    7.40
 -17   1   7   83.46    6.17
 -17   1   7   85.12    6.68
  17  -1  -7   90.24    6.60
  17  -1  -7  103.29    6.95
 -17   1   8   95.70    6.82
 -17   1   8   99.14    7.38
  17  -1  -8  110.71    7.52
  17  -1  -8  115.61    7.65
 -17   1   9  250.63   14.17
 -17   1   9  260.10   15.07
  17  -1  -9  290.83   15.86
  17  -1  -9  292.19   15.91
 -17   1  10   63.42    5.11
 -17   1  10   65.66    5.59
  17  -1 -10   64.82    5.32
  17  -1 -10   63.18    5.36
 -17   1  11  178.59   10.82
 -17   1  11  184.07   11.50
  17  -1 -11  192.61   11.47
  17  -1 -11  201.39   11.97
 -17   1  12    3.54    1.32
 -17   1  12    3.02    1.38
  17  -1 -12    3.50    1.32
  17  -1 -12    2.00    1.51
 -17   1  13  320.36   17.68
 -17   1  13  331.94   18.53
  17  -1 -13  384.62   20.12
  17  -1 -13  396.71   20.92
 -17   1  14   83.94    6.47
 -17   1  14   83.28    6.64
  17  -1 -14   92.75    6.68
  17  -1 -14   99.88    7.31
 -17   1  15  346.92   19.15
 -17   1  15  355.12   19.72
  17  -1 -15  444.76   22.73
  17  -1 -15  435.89   22.89
 -17   1  16  130.52    9.06
 -17   1  16  134.94    9.32
  17  -1 -16  167.95   10.19
  17  -1 -16  170.01   10.80
 -17   1  17   94.64    7.26
 -17   1  17   92.34    7.19
  17  -1 -17  109.91    7.54
  17  -1 -17  108.91    8.09
 -17   1  18  246.93   14.81
 -17   1  18  235.96   14.25
  17  -1 -18  302.99   16.43
  17  -1 -18  317.72   17.71
 -17   1  19    4.56    1.62
  17  -1 -19    4.74    1.56
  17  -1 -19    4.46    1.20
 -17   1  20  130.64    9.62
 -17   1  20  125.62    8.93
  17  -1 -20  165.00   10.09
 -17   1  21   14.63    2.79
 -17   1  21   15.42    2.71
  17  -1 -21   19.83    2.93
  17  -1 -21   17.47    3.14
 -17   1  22   28.11    3.93
 -17   1  22   31.08    3.82
  17  -1 -22   41.53    4.15
  17  -1 -22   37.29    4.41
 -17   2   1    6.03    1.70
 -17   2   1    6.44    1.25
 -17   2   1    4.48    1.17
  17  -2  -1    4.85    1.57
 -17   2   2  428.83   22.36
 -17   2   2  467.98   24.65
 -17   2   2  423.62   25.66
 -17   2   2  373.94   23.22
  17  -2  -2  490.93   24.92
  17  -2  -2  498.01   25.04
  17  -2  -2  521.85   30.47
  17  -2  -2  552.72   32.06
 -17   2   3    1.84    0.91
 -17   2   3    1.54    0.97
 -17   2   3    0.53    0.51
 -17   2   3    0.54    0.48
  17  -2  -3    2.11    1.13
  17  -2  -3    2.63    1.15
  17  -2  -3    0.58    0.60
  17  -2  -3    1.23    0.55
 -17   2   4  722.10   35.58
 -17   2   4  715.14   36.13
  17  -2  -4  782.89   38.20
  17  -2  -4  795.83   38.50
 -17   2   5    4.27    1.17
 -17   2   5    2.48    1.26
  17  -2  -5    1.73    1.24
  17  -2  -5    1.57    1.17
 -17   2   6  270.78   15.01
 -17   2   6  287.72   16.25
  17  -2  -6  307.20   16.59
  17  -2  -6  289.23   15.82
 -17   2   7  111.37    7.53
 -17   2   7  118.06    8.25
  17  -2  -7  120.05    8.02
  17  -2  -7  122.96    8.07
 -17   2   8   74.06    5.68
 -17   2   8   75.09    6.12
  17  -2  -8   86.01    6.27
  17  -2  -8   79.73    6.07
 -17   2   9  153.02    9.66
 -17   2   9  169.08   10.74
  17  -2  -9  178.33   10.75
  17  -2  -9  187.93   11.15
 -17   2  10   30.82    3.39
 -17   2  10   33.32    3.78
  17  -2 -10   32.77    3.56
  17  -2 -10   39.60    3.97
 -17   2  11   42.17    4.07
 -17   2  11   42.97    4.38
  17  -2 -11   49.27    4.38
  17  -2 -11   47.03    4.61
 -17   2  12    0.38    0.94
 -17   2  12    1.69    1.15
  17  -2 -12    1.93    1.06
  17  -2 -12    1.23    1.51
 -17   2  13    1.84    1.17
 -17   2  13    4.71    1.53
  17  -2 -13    3.93    1.44
  17  -2 -13    2.96    1.70
 -17   2  14    5.25    1.60
 -17   2  14    3.05    1.46
  17  -2 -14    7.09    1.71
  17  -2 -14    6.80    1.97
 -17   2  15    2.29    1.19
 -17   2  15    2.31    1.35
  17  -2 -15    2.90    1.36
  17  -2 -15    2.52    1.66
 -17   2  16   31.45    3.76
  17  -2 -16   36.85    3.77
  17  -2 -16   36.74    4.40
  17  -2 -16   32.54    3.20
 -17   2  17   98.26    7.22
 -17   2  17   82.42    6.41
 -17   2  17   78.48    6.24
  17  -2 -17  113.91    7.51
  17  -2 -17  109.16    7.59
 -17   2  18   21.43    3.14
 -17   2  18   20.99    3.08
 -17   2  18   22.26    2.71
 -17   2  18   19.17    2.56
  17  -2 -18   26.22    3.07
  17  -2 -18   27.82    3.70
  17  -2 -18   27.99    2.93
  17  -2 -18   30.27    2.99
 -17   2  19   42.82    4.80
 -17   2  19   51.79    4.96
  17  -2 -19   60.11    5.03
  17  -2 -19   57.18    5.45
  17  -2 -19   56.03    4.90
  17  -2 -19   65.00    5.17
 -17   2  20  127.99    9.51
 -17   2  20  139.15    9.53
  17  -2 -20  180.29   10.73
  17  -2 -20  180.30   11.46
 -17   2  21    7.48    2.05
 -17   2  21    8.56    2.01
  17  -2 -21    8.71    2.09
  17  -2 -21    5.89    2.13
 -17   2  22  101.79    8.44
 -17   2  22  114.45    8.35
  17  -2 -22  155.77    9.67
  17  -2 -22  160.37   10.57
 -17   3   1    9.97    2.10
 -17   3   1   11.02    1.74
 -17   3   1    9.55    1.66
  17  -3  -1   12.55    2.12
 -17   3   2    4.64    1.56
 -17   3   2    7.41    1.90
 -17   3   2    9.53    1.52
 -17   3   2    8.67    1.43
  17  -3  -2    6.27    1.74
  17  -3  -2    7.80    1.73
 -17   3   3    0.51    0.79
 -17   3   3    0.54    1.07
 -17   3   3    0.68    0.52
 -17   3   3    0.40    0.45
 -17   3   4   43.03    4.12
 -17   3   4   47.19    4.63
 -17   3   4   51.18    4.33
 -17   3   4   44.59    4.05
  17  -3  -4   48.46    4.47
  17  -3  -4   55.50    4.65
  17  -3  -4   69.58    5.05
 -17   3   5   26.33    2.91
 -17   3   5   27.02    2.94
  17  -3  -5   35.46    3.54
  17  -3  -5   35.58    3.54
  17  -3  -5   35.49    3.20
  17  -3  -5   36.22    3.25
 -17   3   6   85.64    6.33
 -17   3   6   94.58    7.11
  17  -3  -6   98.02    6.91
  17  -3  -6  102.55    7.03
 -17   3   7  101.10    7.03
 -17   3   7  104.71    7.64
  17  -3  -7  111.00    7.57
  17  -3  -7  119.93    7.88
 -17   3   8  168.05   10.26
 -17   3   8  166.45   10.67
  17  -3  -8  190.70   11.25
  17  -3  -8  190.83   11.35
 -17   3   9  114.96    7.89
 -17   3   9  129.33    8.82
  17  -3  -9  144.76    9.05
  17  -3  -9  150.24    9.42
 -17   3  10   87.95    6.43
 -17   3  10   86.30    6.74
  17  -3 -10   93.40    6.72
  17  -3 -10  101.10    7.22
 -17   3  11  163.59   10.11
 -17   3  11  171.70   10.78
 -17   3  12   17.96    2.62
 -17   3  12   20.62    2.91
  17  -3 -12   23.02    2.83
  17  -3 -12   20.51    3.14
 -17   3  13  325.03   18.15
 -17   3  13  350.05   19.14
  17  -3 -13  382.06   19.99
  17  -3 -13  396.14   21.01
  17  -3 -13  366.08   22.24
 -17   3  14    1.57    1.14
 -17   3  14    1.09    0.56
 -17   3  14    0.57    0.58
  17  -3 -14    0.20    0.92
  17  -3 -14    0.94    0.65
  17  -3 -14   -0.02    0.64
 -17   3  15  348.43   22.00
  17  -3 -15  492.62   24.86
  17  -3 -15  473.11   28.06
  17  -3 -15  505.11   29.62
 -17   3  16   10.48    2.11
 -17   3  16   12.19    2.13
 -17   3  16    5.92    1.53
 -17   3  16    6.85    1.53
  17  -3 -16    9.33    1.66
  17  -3 -16    9.88    1.66
 -17   3  17  137.37    9.96
 -17   3  17  133.01    9.68
  17  -3 -17  202.17   11.59
  17  -3 -17  205.10   12.42
  17  -3 -17  196.14   12.66
  17  -3 -17  188.90   12.22
 -17   3  18   71.11    6.01
 -17   3  18   75.68    6.12
 -17   3  18   50.94    4.96
  17  -3 -18   83.73    6.11
  17  -3 -18   86.87    6.85
  17  -3 -18   80.74    6.32
  17  -3 -18   79.27    6.11
 -17   3  19   22.32    3.15
 -17   3  19   22.90    3.09
 -17   3  19   16.96    2.60
 -17   3  19   15.49    2.53
  17  -3 -19   26.92    3.12
  17  -3 -19   26.67    3.54
  17  -3 -19   24.19    2.91
  17  -3 -19   23.32    2.80
 -17   3  20  104.47    8.21
 -17   3  20  109.98    8.08
  17  -3 -20  134.59    8.70
  17  -3 -20  129.28    9.18
  17  -3 -20  121.15    8.90
  17  -3 -20  118.81    8.58
 -17   3  21   14.14    2.83
 -17   3  21   16.19    2.71
  17  -3 -21   20.46    2.92
  17  -3 -21   21.35    3.30
 -17   3  22   40.53    4.62
 -17   3  23   -0.05    1.00
 -17   3  23    1.11    1.36
 -17   4   1  191.46   11.83
 -17   4   1  182.12   12.22
  17  -4  -1  194.37   11.59
  17  -4  -1  224.69   14.22
 -17   4   2  549.69   28.23
 -17   4   2  499.03   30.03
 -17   4   2  445.93   27.33
  17  -4  -2  596.90   29.60
  17  -4  -2  633.52   36.68
  17  -4  -2  627.89   36.45
 -17   4   3   84.40    6.29
 -17   4   3   95.00    7.09
 -17   4   3   93.59    6.98
 -17   4   3   80.18    6.35
  17  -4  -3   95.48    6.85
  17  -4  -3  100.22    6.90
  17  -4  -3  117.51    8.00
  17  -4  -3  113.41    7.87
 -17   4   4  556.05   27.96
 -17   4   4  561.91   28.91
  17  -4  -4  582.74   29.27
  17  -4  -4  600.54   29.80
 -17   4   5   38.82    3.89
 -17   4   5   42.42    4.38
 -17   4   5   44.80    4.04
 -17   4   5   41.59    3.88
  17  -4  -5   43.80    4.17
  17  -4  -5   45.46    4.23
  17  -4  -5   54.14    4.35
  17  -4  -5   54.88    4.45
 -17   4   6  316.70   17.02
 -17   4   6  307.16   17.26
 -17   4   6  264.75   17.10
  17  -4  -6  340.92   18.12
  17  -4  -6  350.26   18.46
  17  -4  -6  347.83   20.93
  17  -4  -6  378.99   22.55
 -17   4   7   28.62    2.99
 -17   4   7   26.11    3.23
 -17   4   7   19.04    2.51
  17  -4  -7   32.14    3.27
  17  -4  -7   27.96    3.28
  17  -4  -7   25.60    2.70
 -17   4   8  171.65   10.33
 -17   4   8  188.43   11.43
 -17   4   8  137.78    9.82
 -17   4   8  153.36   10.51
  17  -4  -8  193.08   11.26
  17  -4  -8  194.54   11.45
  17  -4  -8  188.10   12.05
  17  -4  -8  198.30   12.62
 -17   4   9    2.13    1.17
 -17   4   9    3.78    1.30
 -17   4   9    1.78    0.76
 -17   4   9    2.36    0.81
  17  -4  -9    2.63    1.29
  17  -4  -9    3.85    1.56
  17  -4  -9    2.07    0.79
  17  -4  -9    1.99    0.83
 -17   4  10   94.29    6.67
 -17   4  10   91.92    6.86
 -17   4  10   69.83    5.85
 -17   4  10   78.25    6.19
  17  -4 -10  104.53    7.03
  17  -4 -10  111.68    7.66
  17  -4 -10  103.30    7.21
 -17   4  11    2.13    1.23
 -17   4  11    1.52    0.71
  17  -4 -11    2.84    1.25
  17  -4 -11    1.27    0.74
 -17   4  12    6.17    1.59
 -17   4  12    2.87    1.07
 -17   4  12    3.73    1.09
  17  -4 -12    6.33    1.59
  17  -4 -12    4.91    1.16
  17  -4 -12    4.84    1.19
 -17   4  13    4.24    1.32
 -17   4  13    5.78    1.56
 -17   4  13    0.72    0.92
 -17   4  13    2.40    0.94
  17  -4 -13    4.83    1.34
  17  -4 -13    1.92    1.62
  17  -4 -13    3.27    1.04
  17  -4 -13    3.07    1.01
 -17   4  14    3.35    1.21
 -17   4  14    2.82    1.30
 -17   4  14    0.88    0.82
 -17   4  14    0.74    0.82
  17  -4 -14    2.15    1.26
  17  -4 -14    1.83    1.47
  17  -4 -14    2.90    0.95
  17  -4 -14    2.48    1.02
 -17   4  15    1.30    1.11
 -17   4  15    1.08    1.19
 -17   4  15    1.32    0.89
 -17   4  15    0.78    0.87
  17  -4 -15    2.94    1.19
  17  -4 -15    1.31    1.45
  17  -4 -15    2.45    1.00
  17  -4 -15    2.80    1.04
 -17   4  16    6.46    1.82
 -17   4  16    7.94    1.91
 -17   4  16    5.98    1.48
  17  -4 -16    6.02    1.68
  17  -4 -16    6.94    2.19
  17  -4 -16    8.90    1.69
  17  -4 -16    8.20    1.64
 -17   4  17   97.54    7.62
 -17   4  17  108.76    7.94
  17  -4 -17  116.23    7.90
  17  -4 -17  128.67    8.99
  17  -4 -17  128.27    9.03
  17  -4 -17  136.29    9.28
 -17   4  18    2.59    1.22
 -17   4  18    2.12    1.30
 -17   4  18    0.78    0.96
  17  -4 -18    1.04    1.25
  17  -4 -18    1.30    1.38
  17  -4 -18    2.84    1.24
  17  -4 -18    2.08    1.16
 -17   4  19   56.33    5.46
 -17   4  19   57.90    5.34
  17  -4 -19   67.29    5.45
  17  -4 -19   68.37    6.03
  17  -4 -19   65.05    5.62
  17  -4 -19   68.99    5.62
 -17   4  20   59.74    5.94
  17  -4 -20   84.65    6.46
  17  -4 -20   78.72    6.71
  17  -4 -20   84.19    6.74
  17  -4 -20   83.74    6.48
 -17   4  21   55.11    5.58
 -17   4  21   55.85    5.30
  17  -4 -21   73.95    5.78
  17  -4 -21   71.06    6.29
 -17   4  22  119.53    9.14
 -17   4  22  116.52    8.46
  17  -4 -22  167.47   10.16
 -17   4  23    0.60    1.21
 -17   5   1    2.40    1.23
 -17   5   1    1.13    0.78
 -17   5   1    0.48    0.74
  17  -5  -1    2.00    1.12
  17  -5  -1    0.75    0.93
  17  -5  -1    2.24    0.87
 -17   5   2    2.90    1.46
 -17   5   2    6.58    1.33
 -17   5   2    5.48    1.23
  17  -5  -2    3.85    1.48
 -17   5   3    2.20    1.25
 -17   5   3    1.56    0.83
 -17   5   3    1.32    0.79
  17  -5  -3    0.98    1.07
  17  -5  -3    2.88    0.93
 -17   5   4  166.81   10.62
 -17   5   4  168.98   11.31
 -17   5   4  144.94   10.13
  17  -5  -4  159.43   10.02
  17  -5  -4  228.29   14.03
  17  -5  -4  204.83   13.02
 -17   5   5   20.67    2.80
 -17   5   5   16.56    2.25
 -17   5   5   14.05    2.07
  17  -5  -5   19.72    2.58
 -17   5   6  211.50   13.83
  17  -5  -6  217.18   12.67
  17  -5  -6  254.93   15.74
  17  -5  -6  234.47   14.89
 -17   5   7    2.99    1.30
 -17   5   7    2.46    0.90
 -17   5   7    3.06    0.99
  17  -5  -7    4.62    1.38
 -17   5   8  182.77   11.43
 -17   5   8  174.25   11.72
 -17   5   8  183.02   12.16
  17  -5  -8  196.01   11.54
  17  -5  -8  219.20   13.75
  17  -5  -8  223.81   14.07
 -17   5   9    4.20    1.49
 -17   5   9    4.17    1.14
 -17   5   9    2.59    1.14
  17  -5  -9    7.97    1.64
  17  -5  -9    6.70    1.24
  17  -5  -9    5.46    1.26
 -17   5  10  201.75   12.06
 -17   5  10  194.10   11.88
 -17   5  10  173.37   11.78
 -17   5  10  186.65   12.41
  17  -5 -10  201.78   11.80
  17  -5 -10  226.85   14.24
  17  -5 -10  236.07   14.75
 -17   5  11   73.59    5.72
 -17   5  11   77.63    6.08
 -17   5  11   57.77    5.17
 -17   5  11   58.15    5.20
  17  -5 -11   84.96    6.05
  17  -5 -11   90.89    6.64
  17  -5 -11   80.70    6.09
  17  -5 -11   78.57    6.04
 -17   5  12  156.09    9.90
 -17   5  12  164.75   10.38
 -17   5  12  137.76    9.79
 -17   5  12  129.86    9.44
  17  -5 -12  164.30   10.03
  17  -5 -12  180.78   11.15
  17  -5 -12  184.19   11.90
  17  -5 -12  181.80   11.80
 -17   5  13  425.61   22.41
 -17   5  13  428.17   22.66
 -17   5  13  360.11   22.70
 -17   5  13  377.54   23.40
  17  -5 -13  486.83   24.51
  17  -5 -13  502.64   25.71
  17  -5 -13  495.86   29.21
 -17   5  14   56.15    5.09
 -17   5  14   61.45    5.38
 -17   5  14   51.92    4.85
 -17   5  14   52.55    4.85
  17  -5 -14   71.65    5.47
  17  -5 -14   69.48    5.82
  17  -5 -14   75.53    5.82
  17  -5 -14   75.66    5.79
 -17   5  15  267.33   15.37
 -17   5  15  276.98   15.72
 -17   5  15  213.60   14.53
 -17   5  15  244.81   15.88
  17  -5 -15  291.00   15.88
  17  -5 -15  321.43   17.69
  17  -5 -15  315.16   19.33
  17  -5 -15  319.13   19.46
 -17   5  16   13.42    2.40
 -17   5  16   16.06    2.56
 -17   5  16   12.85    2.22
  17  -5 -16   12.99    2.30
  17  -5 -16   13.35    2.74
  17  -5 -16   20.32    2.48
 -17   5  17  162.86   10.65
 -17   5  17  176.43   11.06
 -17   5  17  139.36   10.29
 -17   5  17  139.89   10.15
  17  -5 -17  204.10   11.70
  17  -5 -17  202.02   12.38
  17  -5 -17  199.68   13.04
  17  -5 -17  196.85   12.72
 -17   5  18   15.89    2.59
 -17   5  18    8.96    2.18
 -17   5  18   12.84    2.24
  17  -5 -18   20.09    2.65
  17  -5 -18   16.15    2.85
  17  -5 -18   18.57    2.51
[truncated: 6,206,322 more chars]
