# Supplementary material for: Platinum(0)-η2-1,2-(E)ditosylethene Complexes Bearing Phosphine, Isocyanide and N-Heterocyclic Carbene Ligands: Synthesis and Cytotoxicity towards Ovarian and Breast Cancer Cells
Source: Molecules. 2024 Mar 1;29(5):1119. doi: 10.3390/molecules29051119 (PMC10934098; doi:10.3390/molecules29051119)
Supplement: Supplementary file 1 [file molecules-29-01119-s001.zip › 2aRT.cif]

data_NC5RT

_publ_section_title
;
Platinum - trans-sulfone based organometallic complexes
;
 
_publ_contact_author_name        'Nicola Demitri'
_publ_contact_author_address     
;
Elettra-Sincrotrone Trieste, S.S. 14 Km 163.5 in Area Science Park, 
34149 Basovizza - Trieste, Italy.
;
_publ_contact_author_email       nicola.demitri@elettra.eu
_publ_contact_author_phone       '+39 040 375 8861'
loop_
_publ_author_name
_publ_author_address
'Demitri, Nicola'
;
Elettra-Sincrotrone Trieste, S.S. 14 Km 163.5 in Area Science Park, 
34149 Basovizza-Trieste, Italy.
;
'Visentin, Fabiano'
;
Dipartimento di Scienze Molecolari e Nanosistemi, Universita' Ca' Foscari,
Campus Scientifico - Via Torino 155, 30174 Venezia-Mestre, Italy.
;

_publ_section_abstract
;
The structure of NC5RT, PtC~52~H~46~O~4~P~2~S~2~ 1/4 C~4~H~10~O 1/4 CH~2Cl~2~,
at 298 K has triclinic (<i>P</i>-1) symmetry.
;
_publ_contact_letter 
;
Please consider this CIF for publication. I certify that this contibution is the
original work of those listed as authors; that it has not been published
before (in any language or medium) and is not being considered for publication
elsewhere; that all authors concur with and are aware of the submission; that
all workers involved in the study are listed as authors or given proper credit
in the acknowledgements; that I have obtained permission for and acknowledged
the source of any excerpts from other copyright works; and that to the best of
my knowledge the paper contains no statements which are libellous, unlawful or
in any way actionable. All coauthors have made significant scientific
contributions to the work reported, including the ideas and their execution,
and share responsibility and accountability for the results.
;

_audit_creation_method            'SHELXL-2019/3'
_shelx_SHELXL_version_number      '2019/3'
_chemical_name_systematic         ?
_chemical_name_common             ?
_chemical_melting_point           ?
_chemical_formula_moiety
 'C52 H46 O4 P2 Pt S2, 0.25 (C4 H10 O), 0.25 (C H2 Cl2)'
_chemical_formula_sum
 'C53.25 H48.75 Cl0.50 O4.25 P2 Pt S2'
_chemical_formula_weight          1095.54

loop_
 _atom_type_symbol
 _atom_type_description
 _atom_type_scat_dispersion_real
 _atom_type_scat_dispersion_imag
 _atom_type_scat_source
 'C'  'C'   0.0020   0.0012
 'International Tables Vol C Tables 4.2.6.8 and 6.1.1.4'
 'H'  'H'   0.0000   0.0000
 'International Tables Vol C Tables 4.2.6.8 and 6.1.1.4'
 'O'  'O'   0.0077   0.0045
 'International Tables Vol C Tables 4.2.6.8 and 6.1.1.4'
 'S'  'S'   0.0994   0.0945
 'International Tables Vol C Tables 4.2.6.8 and 6.1.1.4'
 'Pt'  'Pt'  -0.8479   6.7557
 'International Tables Vol C Tables 4.2.6.8 and 6.1.1.4'
 'P'  'P'   0.0809   0.0720
 'International Tables Vol C Tables 4.2.6.8 and 6.1.1.4'
 'Cl'  'Cl'   0.1198   0.1216
 'International Tables Vol C Tables 4.2.6.8 and 6.1.1.4'
 
_space_group_crystal_system       triclinic
_space_group_IT_number            2
_space_group_name_H-M_alt         'P -1'
_space_group_name_Hall            '-P 1'
 
_shelx_space_group_comment
;
The symmetry employed for this shelxl refinement is uniquely defined
by the following loop, which should always be used as a source of
symmetry information in preference to the above space-group names.
They are only intended as comments.
;
 
loop_
 _space_group_symop_operation_xyz
 'x, y, z'
 '-x, -y, -z'
 
_cell_length_a                    14.754(3)
_cell_length_b                    18.270(4)
_cell_length_c                    18.705(4)
_cell_angle_alpha                 101.72(3)
_cell_angle_beta                  95.88(3)
_cell_angle_gamma                 98.88(3)
_cell_volume                      4830.9(18)
_cell_formula_units_Z             4
_cell_measurement_temperature     298(2)
_cell_measurement_reflns_used     14725
_cell_measurement_theta_min       0.978
_cell_measurement_theta_max       31.117
 
_exptl_crystal_description        'Thin blocks'
_exptl_crystal_colour             'Colourless'
_exptl_crystal_density_meas       ?
_exptl_crystal_density_method     ?
_exptl_crystal_density_diffrn     1.506          
_exptl_crystal_F_000              2203
_exptl_transmission_factor_min    ?
_exptl_transmission_factor_max    ?
_exptl_crystal_size_max           0.100
_exptl_crystal_size_mid           0.050
_exptl_crystal_size_min           0.020
_exptl_absorpt_coefficient_mu     2.188
_shelx_estimated_absorpt_T_min    0.811
_shelx_estimated_absorpt_T_max    0.958
_exptl_absorpt_correction_type    none
_exptl_absorpt_correction_T_min   ?
_exptl_absorpt_correction_T_max   ?
_exptl_absorpt_process_details    ?
_exptl_absorpt_special_details    ?
_diffrn_ambient_temperature       298(2)
_diffrn_radiation_wavelength      0.620

_diffrn_measurement_method       'Rotating crystal'
_diffrn_radiation_type           Synchrotron
_diffrn_source                   'Elettra Synchrotron - XRD2 BL'
_diffrn_measurement_device_type  
;
'Arinax MD2s Goniometer, Pilatus 6M detector'
;
_diffrn_detector_area_resol_mean  ?
_diffrn_reflns_number             232518
_diffrn_reflns_av_unetI/netI      0.0554
_diffrn_reflns_av_R_equivalents   0.0492
_diffrn_reflns_limit_h_min        -24
_diffrn_reflns_limit_h_max        24
_diffrn_reflns_limit_k_min        -29
_diffrn_reflns_limit_k_max        29
_diffrn_reflns_limit_l_min        -29
_diffrn_reflns_limit_l_max        29
_diffrn_reflns_theta_min          0.979
_diffrn_reflns_theta_max          31.827
_diffrn_reflns_theta_full         21.839
_diffrn_measured_fraction_theta_max   0.817
_diffrn_measured_fraction_theta_full  0.981
_diffrn_reflns_Laue_measured_fraction_max    0.817
_diffrn_reflns_Laue_measured_fraction_full   0.981
_diffrn_reflns_point_group_measured_fraction_max   0.817
_diffrn_reflns_point_group_measured_fraction_full  0.981
_reflns_number_total              40702
_reflns_number_gt                 34524
_reflns_threshold_expression      'I > 2\s(I)'
_reflns_Friedel_coverage          0.000
_reflns_Friedel_fraction_max      .
_reflns_Friedel_fraction_full     .
 
_reflns_special_details
;
 Reflections were merged by SHELXL according to the crystal
 class for the calculation of statistics and refinement.
 
 _reflns_Friedel_fraction is defined as the number of unique
 Friedel pairs measured divided by the number that would be
 possible theoretically, ignoring centric projections and
 systematic absences.
;

_diffrn_standards_number 0
_diffrn_standards_interval_count 0
_diffrn_standards_decay_% 0
 
_computing_data_collection       'Elettra XRD2 Data Collection SW'
_computing_cell_refinement       'XDS (Kabsch, 2010)'
_computing_data_reduction        'XDS (Kabsch, 2010)'
_computing_structure_solution    'SHELXT (Sheldrick, 2015)'
_computing_structure_refinement 'SHELXL-2019/3 (Sheldrick, 2015)'
_computing_molecular_graphics    'Ortep3 for Windows - Coot'
_computing_publication_material  'enCIFer - publCIF'
 
_refine_special_details
;
Hydrogen atoms were included at calculated positions with isotropic 
Ufactors=1.2Ueq or Ufactors=1.5Ueq for methyl groups. Anisotropic thermal
motion modeling has been applied to all atoms. Thermal and geometrical
restrains have been applied to disordered residues.
;

_refine_ls_structure_factor_coef  Fsqd
_refine_ls_matrix_type            full
_refine_ls_weighting_scheme       calc
_refine_ls_weighting_details
'w=1/[\s^2^(Fo^2^)+2.7694P] where P=(Fo^2^+2Fc^2^)/3'
_atom_sites_solution_primary      direct
_atom_sites_solution_secondary    difmap
_atom_sites_solution_hydrogens    geom
_refine_ls_hydrogen_treatment     constr
_refine_ls_extinction_method      none
_refine_ls_extinction_coef        .
_refine_ls_number_reflns          40702
_refine_ls_number_parameters      1150
_refine_ls_number_restraints      70
_refine_ls_R_factor_all           0.0428
_refine_ls_R_factor_gt            0.0343
_refine_ls_wR_factor_ref          0.0940
_refine_ls_wR_factor_gt           0.0881
_refine_ls_goodness_of_fit_ref    1.055
_refine_ls_restrained_S_all       1.055
_refine_ls_shift/su_max           0.009
_refine_ls_shift/su_mean          0.000
 
loop_
 _atom_site_label
 _atom_site_type_symbol
 _atom_site_fract_x
 _atom_site_fract_y
 _atom_site_fract_z
 _atom_site_U_iso_or_equiv
 _atom_site_adp_type
 _atom_site_occupancy
 _atom_site_site_symmetry_order  
 _atom_site_calc_flag
 _atom_site_refinement_flags_posn
 _atom_site_refinement_flags_adp
 _atom_site_refinement_flags_occupancy
 _atom_site_disorder_assembly
 _atom_site_disorder_group
O1_91 O 0.2712(9) 0.4230(7) 0.0974(12) 0.276(14) Uani 0.530(16) 1 d D . P A 1
C1_91 C 0.4103(10) 0.4673(12) 0.0543(8) 0.124(6) Uani 0.530(16) 1 d D . P A 1
H1A_91 H 0.476048 0.482946 0.068073 0.186 Uiso 0.530(16) 1 calc R U P A 1
H1B_91 H 0.397943 0.424244 0.013317 0.186 Uiso 0.530(16) 1 calc R U P A 1
H1C_91 H 0.384324 0.508304 0.040626 0.186 Uiso 0.530(16) 1 calc R U P A 1
C2_91 C 0.3683(9) 0.4462(14) 0.1172(10) 0.27(2) Uani 0.530(16) 1 d D . P A 1
H2A_91 H 0.394965 0.405164 0.131596 0.324 Uiso 0.530(16) 1 calc R U P A 1
H2B_91 H 0.381314 0.489421 0.158969 0.324 Uiso 0.530(16) 1 calc R U P A 1
C3_91 C 0.2170(12) 0.4738(9) 0.1329(11) 0.172(11) Uani 0.530(16) 1 d D . P A 1
H3A_91 H 0.237961 0.524755 0.126478 0.206 Uiso 0.530(16) 1 calc R U P A 1
H3B_91 H 0.223126 0.474996 0.185233 0.206 Uiso 0.530(16) 1 calc R U P A 1
C4_91 C 0.1196(11) 0.4469(11) 0.0995(12) 0.184(11) Uani 0.530(16) 1 d D . P A 1
H4A_91 H 0.081851 0.480474 0.122765 0.276 Uiso 0.530(16) 1 calc R U P A 1
H4B_91 H 0.114105 0.446148 0.047800 0.276 Uiso 0.530(16) 1 calc R U P A 1
H4A3_91 H 0.099325 0.396572 0.106339 0.276 Uiso 0.530(16) 1 calc R U P A 1
C1A_92 C 0.3586(19) 0.467(5) 0.146(2) 0.247(9) Uani 0.226(12) 1 d D U P B -2
H1A_92 H 0.382707 0.421920 0.152834 0.296 Uiso 0.226(12) 1 calc R U P B -2
H1B_92 H 0.388007 0.508802 0.186367 0.296 Uiso 0.226(12) 1 calc R U P B -2
Cl1A_92 Cl 0.3848(18) 0.4877(18) 0.0626(16) 0.266(10) Uani 0.226(12) 1 d D U P B -2
Cl2A_92 Cl 0.2391(19) 0.4513(11) 0.1468(12) 0.228(9) Uani 0.226(12) 1 d D U P B -2
C1B_92 C 0.2568(18) 0.4893(14) 0.089(3) 0.242(9) Uani 0.233(8) 1 d D U P C -3
H1C_92 H 0.254159 0.528979 0.061338 0.290 Uiso 0.233(8) 1 calc R U P C -3
H1D_92 H 0.248295 0.509762 0.139007 0.290 Uiso 0.233(8) 1 calc R U P C -3
Cl1B_92 Cl 0.3644(17) 0.4619(16) 0.0875(18) 0.267(10) Uani 0.233(8) 1 d D U P C -3
Cl2B_92 Cl 0.1682(13) 0.4125(7) 0.0494(9) 0.214(8) Uani 0.233(8) 1 d D U P C -3
Pt_11 Pt 0.96760(2) 0.27984(2) 0.70146(2) 0.03577(2) Uani 1 1 d . . . . .
C9_12 C 0.6569(4) 0.3765(3) 1.0781(3) 0.1055(18) Uani 1 1 d . . . . .
H9A_12 H 0.618385 0.409085 1.061222 0.158 Uiso 1 1 calc R U . . .
H9B_12 H 0.686170 0.399505 1.127535 0.158 Uiso 1 1 calc R U . . .
H9C_12 H 0.619516 0.328327 1.077439 0.158 Uiso 1 1 calc R U . . .
C8_12 C 0.78418(15) 0.28855(10) 0.92517(11) 0.0619(7) Uani 1 1 d G . . . .
H8_12 H 0.775914 0.244481 0.888342 0.074 Uiso 1 1 calc R U . . .
C7_12 C 0.71835(13) 0.29871(12) 0.97265(13) 0.0640(8) Uani 1 1 d G . . . .
H7_12 H 0.666029 0.261448 0.967588 0.077 Uiso 1 1 calc R U . . .
C6_12 C 0.73071(17) 0.36458(14) 1.02771(13) 0.0718(9) Uani 1 1 d G . . . .
C5_12 C 0.8089(2) 0.42028(12) 1.03528(13) 0.0988(17) Uani 1 1 d G . . . .
H5_12 H 0.817179 0.464344 1.072112 0.119 Uiso 1 1 calc R U . . .
C4_12 C 0.87475(16) 0.41011(12) 0.98780(13) 0.0864(13) Uani 1 1 d G . . . .
H4_12 H 0.927065 0.447379 0.992866 0.104 Uiso 1 1 calc R U . . .
C3_12 C 0.86238(13) 0.34425(12) 0.93275(11) 0.0531(6) Uani 1 1 d G . . . .
S1_12 S 0.94743(5) 0.33234(5) 0.87328(4) 0.05728(17) Uani 1 1 d . . . . .
O1_12 O 1.01709(19) 0.4007(2) 0.89405(16) 0.0922(10) Uani 1 1 d . . . . .
O2_12 O 0.9746(2) 0.26125(18) 0.87624(14) 0.0786(8) Uani 1 1 d . . . . .
C1_12 C 0.89351(17) 0.32593(15) 0.78395(14) 0.0450(5) Uani 1 1 d . . . . .
H1_12 H 0.865658 0.369498 0.776071 0.054 Uiso 1 1 calc R U . . .
C2_12 C 0.84509(15) 0.25174(14) 0.74234(13) 0.0418(4) Uani 1 1 d . . . . .
H2_12 H 0.842119 0.210407 0.768688 0.050 Uiso 1 1 calc R U . . .
S2_12 S 0.74602(4) 0.25011(5) 0.68039(4) 0.05116(14) Uani 1 1 d . . . . .
O4_12 O 0.73001(16) 0.18105(18) 0.62527(13) 0.0743(7) Uani 1 1 d . . . . .
O3_12 O 0.75454(16) 0.32167(18) 0.65835(16) 0.0759(8) Uani 1 1 d . . . . .
C16_12 C 0.4465(3) 0.2302(4) 0.8772(3) 0.1003(16) Uani 1 1 d . . . . .
H16A_12 H 0.423812 0.277146 0.888716 0.150 Uiso 1 1 calc R U . . .
H16B_12 H 0.474676 0.219637 0.921623 0.150 Uiso 1 1 calc R U . . .
H16C_12 H 0.395904 0.189760 0.854353 0.150 Uiso 1 1 calc R U . . .
C15_12 C 0.61179(15) 0.17519(9) 0.74214(13) 0.0639(8) Uani 1 1 d G . . . .
H15_12 H 0.628855 0.131042 0.717257 0.077 Uiso 1 1 calc R U . . .
C14_12 C 0.54311(15) 0.17075(11) 0.78750(15) 0.0762(10) Uani 1 1 d G . . . .
H14_12 H 0.514221 0.123617 0.792972 0.091 Uiso 1 1 calc R U . . .
C13_12 C 0.51761(15) 0.23674(15) 0.82469(14) 0.0692(9) Uani 1 1 d G . . . .
C12_12 C 0.56079(18) 0.30718(12) 0.81652(15) 0.0895(14) Uani 1 1 d G . . . .
H12_12 H 0.543731 0.351327 0.841403 0.107 Uiso 1 1 calc R U . . .
C11_12 C 0.62947(16) 0.31163(9) 0.77116(15) 0.0758(11) Uani 1 1 d G . . . .
H11_12 H 0.658364 0.358754 0.765688 0.091 Uiso 1 1 calc R U . . .
C10_12 C 0.65497(12) 0.24564(11) 0.73397(11) 0.0489(5) Uani 1 1 d G . . . .
P_13 P 0.98739(4) 0.17292(3) 0.62065(3) 0.03758(10) Uani 1 1 d . . . . .
C18_13 C 1.09784(12) 0.06012(8) 0.62423(11) 0.0543(6) Uani 1 1 d G . . . .
H18_13 H 1.046325 0.025923 0.597655 0.065 Uiso 1 1 calc R U . . .
C17_13 C 1.17895(15) 0.03444(9) 0.64319(13) 0.0662(8) Uani 1 1 d G . . . .
H17_13 H 1.181709 -0.016928 0.629307 0.079 Uiso 1 1 calc R U . . .
C16_13 C 1.25595(12) 0.08555(12) 0.68291(14) 0.0698(9) Uani 1 1 d G . . . .
H16_13 H 1.310222 0.068370 0.695600 0.084 Uiso 1 1 calc R U . . .
C15_13 C 1.25184(10) 0.16233(11) 0.70367(13) 0.0695(9) Uani 1 1 d G . . . .
H15_13 H 1.303351 0.196520 0.730240 0.083 Uiso 1 1 calc R U . . .
C14_13 C 1.17072(12) 0.18800(7) 0.68470(11) 0.0527(6) Uani 1 1 d G . . . .
H14_13 H 1.167968 0.239373 0.698588 0.063 Uiso 1 1 calc R U . . .
C13_13 C 1.09372(9) 0.13690(9) 0.64498(10) 0.0411(4) Uani 1 1 d G . . . .
C7_13 C 0.89921(11) 0.09075(8) 0.62058(9) 0.0423(4) Uani 1 1 d G . . . .
C8_13 C 0.84575(14) 0.04653(11) 0.55638(7) 0.0539(6) Uani 1 1 d G . . . .
H8_13 H 0.853561 0.058749 0.511227 0.065 Uiso 1 1 calc R U . . .
C9_13 C 0.78061(15) -0.01594(11) 0.55966(10) 0.0689(9) Uani 1 1 d G . . . .
H9_13 H 0.744840 -0.045530 0.516708 0.083 Uiso 1 1 calc R U . . .
C10_13 C 0.76894(14) -0.03420(11) 0.62714(12) 0.0732(10) Uani 1 1 d G . . . .
H10_13 H 0.725353 -0.076005 0.629341 0.088 Uiso 1 1 calc R U . . .
C11_13 C 0.82240(15) 0.01001(12) 0.69134(9) 0.0627(7) Uani 1 1 d G . . . .
H11_13 H 0.814587 -0.002202 0.736495 0.075 Uiso 1 1 calc R U . . .
C12_13 C 0.88754(13) 0.07249(10) 0.68806(8) 0.0497(5) Uani 1 1 d G . . . .
H12_13 H 0.923308 0.102077 0.731016 0.060 Uiso 1 1 calc R U . . .
C1_13 C 0.98517(14) 0.17440(12) 0.52322(8) 0.0472(5) Uani 1 1 d G . . . .
C2_13 C 0.91960(15) 0.21036(14) 0.49257(13) 0.0703(9) Uani 1 1 d G . . . .
H2_13 H 0.879188 0.232515 0.521551 0.084 Uiso 1 1 calc R U . . .
C3_13 C 0.91442(19) 0.21319(17) 0.41859(13) 0.0957(15) Uani 1 1 d G . . . .
H3_13 H 0.870546 0.237247 0.398074 0.115 Uiso 1 1 calc R U . . .
C4_13 C 0.9748(2) 0.18007(18) 0.37526(9) 0.0956(16) Uani 1 1 d G . . . .
H4_13 H 0.971353 0.181971 0.325767 0.115 Uiso 1 1 calc R U . . .
C5_13 C 1.0404(2) 0.14412(16) 0.40592(11) 0.0838(12) Uani 1 1 d G . . . .
H5_13 H 1.080804 0.121961 0.376936 0.101 Uiso 1 1 calc R U . . .
C6_13 C 1.04557(15) 0.14128(14) 0.47990(11) 0.0645(8) Uani 1 1 d G . . . .
H6_13 H 1.089448 0.117228 0.500413 0.077 Uiso 1 1 calc R U . . .
P_14 P 1.07898(4) 0.37719(3) 0.69012(4) 0.04015(11) Uani 1 1 d . . . . .
C18_14 C 1.16257(18) 0.32837(13) 0.56596(12) 0.0757(11) Uani 1 1 d G . . . .
H18_14 H 1.190967 0.300237 0.594860 0.091 Uiso 1 1 calc R U . . .
C17_14 C 1.1782(2) 0.32269(14) 0.49317(13) 0.0830(12) Uani 1 1 d G . . . .
H17_14 H 1.217009 0.290763 0.473357 0.100 Uiso 1 1 calc R U . . .
C16_14 C 1.1357(2) 0.36474(19) 0.44997(10) 0.0816(11) Uani 1 1 d G . . . .
H16_14 H 1.146160 0.360941 0.401268 0.098 Uiso 1 1 calc R U . . .
C15_14 C 1.0777(2) 0.4125(2) 0.47958(14) 0.132(3) Uani 1 1 d G . . . .
H15_14 H 1.049269 0.440593 0.450681 0.158 Uiso 1 1 calc R U . . .
C14_14 C 1.06207(19) 0.41814(17) 0.55238(14) 0.0958(16) Uani 1 1 d G . . . .
H14_14 H 1.023225 0.450068 0.572183 0.115 Uiso 1 1 calc R U . . .
C13_14 C 1.10451(15) 0.37609(12) 0.59557(9) 0.0473(5) Uani 1 1 d G . . . .
C7_14 C 1.03706(12) 0.46693(9) 0.71591(12) 0.0479(5) Uani 1 1 d G . . . .
C8_14 C 1.09438(12) 0.53257(11) 0.75753(14) 0.0717(9) Uani 1 1 d G . . . .
H8_14 H 1.154920 0.531024 0.775819 0.086 Uiso 1 1 calc R U . . .
C9_14 C 1.06120(18) 0.60053(10) 0.77181(17) 0.0987(16) Uani 1 1 d G . . . .
H9_14 H 1.099553 0.644446 0.799659 0.118 Uiso 1 1 calc R U . . .
C10_14 C 0.97071(19) 0.60284(11) 0.74448(17) 0.0925(14) Uani 1 1 d G . . . .
H10_14 H 0.948520 0.648311 0.754037 0.111 Uiso 1 1 calc R U . . .
C11_14 C 0.91340(13) 0.53720(14) 0.70286(15) 0.0744(10) Uani 1 1 d G . . . .
H11_14 H 0.852854 0.538754 0.684575 0.089 Uiso 1 1 calc R U . . .
C12_14 C 0.94657(12) 0.46925(11) 0.68858(12) 0.0591(7) Uani 1 1 d G . . . .
H12_14 H 0.908221 0.425332 0.660733 0.071 Uiso 1 1 calc R U . . .
C1_14 C 1.19216(10) 0.39381(11) 0.74603(10) 0.0476(5) Uani 1 1 d G . . . .
C2_14 C 1.19696(13) 0.36769(13) 0.81088(12) 0.0591(7) Uani 1 1 d G . . . .
H2_14 H 1.143973 0.341686 0.823731 0.071 Uiso 1 1 calc R U . . .
C3_14 C 1.28095(16) 0.38044(16) 0.85651(11) 0.0803(11) Uani 1 1 d G . . . .
H3_14 H 1.284162 0.362965 0.899901 0.096 Uiso 1 1 calc R U . . .
C4_14 C 1.36015(12) 0.41931(17) 0.83730(15) 0.0854(12) Uani 1 1 d G . . . .
H4_14 H 1.416345 0.427837 0.867832 0.102 Uiso 1 1 calc R U . . .
C5_14 C 1.35535(11) 0.44543(16) 0.77245(16) 0.0878(13) Uani 1 1 d G . . . .
H5_14 H 1.408341 0.471431 0.759594 0.105 Uiso 1 1 calc R U . . .
C6_14 C 1.27136(14) 0.43268(14) 0.72681(12) 0.0697(9) Uani 1 1 d G . . . .
H6_14 H 1.268153 0.450153 0.683423 0.084 Uiso 1 1 calc R U . . .
Pt_21 Pt 0.43941(2) 0.22295(2) 0.25334(2) 0.03448(2) Uani 1 1 d . . . . .
C9_22 C -0.0925(3) 0.1175(3) -0.0195(3) 0.0987(16) Uani 1 1 d . . . . .
H9A_22 H -0.143380 0.142414 -0.007125 0.148 Uiso 1 1 calc R U . . .
H9B_22 H -0.112055 0.063505 -0.027821 0.148 Uiso 1 1 calc R U . . .
H9C_22 H -0.072286 0.130202 -0.063318 0.148 Uiso 1 1 calc R U . . .
C8_22 C 0.08632(15) 0.11628(10) 0.14162(13) 0.0728(10) Uani 1 1 d G . . . .
H8_22 H 0.105333 0.081742 0.167621 0.087 Uiso 1 1 calc R U . . .
C7_22 C 0.01541(15) 0.09193(10) 0.08258(14) 0.0821(12) Uani 1 1 d G . . . .
H7_22 H -0.013021 0.041103 0.069082 0.098 Uiso 1 1 calc R U . . .
C6_22 C -0.01301(13) 0.14356(14) 0.04371(11) 0.0666(8) Uani 1 1 d G . . . .
C5_22 C 0.02949(15) 0.21953(13) 0.06388(12) 0.0707(9) Uani 1 1 d G . . . .
H5_22 H 0.010473 0.254069 0.037879 0.085 Uiso 1 1 calc R U . . .
C4_22 C 0.10040(13) 0.24388(9) 0.12292(12) 0.0601(7) Uani 1 1 d G . . . .
H4_22 H 0.128826 0.294710 0.136418 0.072 Uiso 1 1 calc R U . . .
C3_22 C 0.12881(11) 0.19226(10) 0.16179(9) 0.0443(5) Uani 1 1 d G . . . .
S1_22 S 0.21733(4) 0.22329(4) 0.23802(3) 0.04296(11) Uani 1 1 d . . . . .
O1_22 O 0.19667(16) 0.29061(15) 0.28267(12) 0.0670(6) Uani 1 1 d . . . . .
O2_22 O 0.22437(15) 0.15854(14) 0.26936(13) 0.0623(5) Uani 1 1 d . . . . .
C1_22 C 0.31905(15) 0.24860(13) 0.20137(12) 0.0382(4) Uani 1 1 d . . . . .
H1_22 H 0.326078 0.296835 0.185476 0.046 Uiso 1 1 calc R U . . .
C2_22 C 0.35125(15) 0.18647(13) 0.15513(12) 0.0378(4) Uani 1 1 d . . . . .
H2_22 H 0.312332 0.136328 0.148378 0.045 Uiso 1 1 calc R U . . .
S2_22 S 0.39857(4) 0.20466(4) 0.07699(3) 0.04834(13) Uani 1 1 d . . . . .
O4_22 O 0.46707(16) 0.15776(18) 0.06178(12) 0.0736(7) Uani 1 1 d . . . . .
O3_22 O 0.42596(18) 0.28495(15) 0.08557(14) 0.0698(6) Uani 1 1 d . . . . .
C16_22 C 0.0786(3) 0.0889(4) -0.1688(2) 0.1102(19) Uani 1 1 d . . . . .
H16A_22 H 0.032711 0.120651 -0.161797 0.165 Uiso 1 1 calc R U . . .
H16B_22 H 0.051818 0.037632 -0.168538 0.165 Uiso 1 1 calc R U . . .
H16C_22 H 0.100483 0.090238 -0.215215 0.165 Uiso 1 1 calc R U . . .
C15_22 C 0.28649(16) 0.09483(10) -0.02904(12) 0.0698(9) Uani 1 1 d G . . . .
H15_22 H 0.322738 0.061646 -0.014491 0.084 Uiso 1 1 calc R U . . .
C14_22 C 0.21276(17) 0.06783(11) -0.08558(13) 0.0835(12) Uani 1 1 d G . . . .
H14_22 H 0.199681 0.016589 -0.108871 0.100 Uiso 1 1 calc R U . . .
C13_22 C 0.15859(14) 0.11743(16) -0.10732(11) 0.0742(10) Uani 1 1 d G . . . .
C12_22 C 0.17814(14) 0.19402(14) -0.07252(12) 0.0731(10) Uani 1 1 d G . . . .
H12_22 H 0.141899 0.227207 -0.087063 0.088 Uiso 1 1 calc R U . . .
C11_22 C 0.25187(14) 0.22102(10) -0.01597(11) 0.0617(7) Uani 1 1 d G . . . .
H11_22 H 0.264956 0.272266 0.007317 0.074 Uiso 1 1 calc R U . . .
C10_22 C 0.30605(11) 0.17142(11) 0.00577(9) 0.0468(5) Uani 1 1 d G . . . .
P_23 P 0.53007(4) 0.13136(3) 0.24634(3) 0.03586(10) Uani 1 1 d . . . . .
C18_23 C 0.51505(15) 0.02917(11) 0.34134(12) 0.0659(8) Uani 1 1 d G . . . .
H18_23 H 0.470496 -0.002574 0.304802 0.079 Uiso 1 1 calc R U . . .
C17_23 C 0.53840(19) 0.00735(13) 0.40682(14) 0.0877(13) Uani 1 1 d G . . . .
H17_23 H 0.509470 -0.039008 0.414084 0.105 Uiso 1 1 calc R U . . .
C16_23 C 0.60499(19) 0.05480(16) 0.46143(11) 0.0858(13) Uani 1 1 d G . . . .
H16_23 H 0.620616 0.040193 0.505234 0.103 Uiso 1 1 calc R U . . .
C15_23 C 0.64823(17) 0.12408(15) 0.45056(10) 0.0775(11) Uani 1 1 d G . . . .
H15_23 H 0.692789 0.155828 0.487103 0.093 Uiso 1 1 calc R U . . .
C14_23 C 0.62488(15) 0.14591(10) 0.38509(11) 0.0634(8) Uani 1 1 d G . . . .
H14_23 H 0.653816 0.192263 0.377821 0.076 Uiso 1 1 calc R U . . .
C13_23 C 0.55829(13) 0.09846(10) 0.33048(8) 0.0441(5) Uani 1 1 d G . . . .
C7_23 C 0.46603(10) 0.04539(8) 0.18106(8) 0.0407(4) Uani 1 1 d G . . . .
C8_23 C 0.50363(10) 0.00883(10) 0.12155(10) 0.0519(6) Uani 1 1 d G . . . .
H8_23 H 0.564851 0.025248 0.115996 0.062 Uiso 1 1 calc R U . . .
C9_23 C 0.44972(14) -0.05228(11) 0.07033(9) 0.0641(8) Uani 1 1 d G . . . .
H9_23 H 0.474874 -0.076737 0.030505 0.077 Uiso 1 1 calc R U . . .
C10_23 C 0.35821(13) -0.07682(10) 0.07862(11) 0.0691(9) Uani 1 1 d G . . . .
H10_23 H 0.322142 -0.117701 0.044349 0.083 Uiso 1 1 calc R U . . .
C11_23 C 0.32061(9) -0.04026(11) 0.13814(12) 0.0606(7) Uani 1 1 d G . . . .
H11_23 H 0.259386 -0.056680 0.143685 0.073 Uiso 1 1 calc R U . . .
C12_23 C 0.37452(10) 0.02084(10) 0.18936(9) 0.0474(5) Uani 1 1 d G . . . .
H12_23 H 0.349362 0.045305 0.229178 0.057 Uiso 1 1 calc R U . . .
C1_23 C 0.64280(9) 0.14743(11) 0.21418(10) 0.0439(5) Uani 1 1 d G . . . .
C2_23 C 0.65846(12) 0.19947(12) 0.16996(12) 0.0601(7) Uani 1 1 d G . . . .
H2_23 H 0.611569 0.224693 0.156436 0.072 Uiso 1 1 calc R U . . .
C3_23 C 0.74418(15) 0.21379(15) 0.14594(13) 0.0821(12) Uani 1 1 d G . . . .
H3_23 H 0.754656 0.248608 0.116347 0.099 Uiso 1 1 calc R U . . .
C4_23 C 0.81426(11) 0.17609(16) 0.16614(14) 0.0834(12) Uani 1 1 d G . . . .
H4_23 H 0.871621 0.185677 0.150072 0.100 Uiso 1 1 calc R U . . .
C5_23 C 0.79861(11) 0.12406(14) 0.21037(14) 0.0758(11) Uani 1 1 d G . . . .
H5_23 H 0.845499 0.098831 0.223886 0.091 Uiso 1 1 calc R U . . .
C6_23 C 0.71288(13) 0.10973(11) 0.23439(12) 0.0586(7) Uani 1 1 d G . . . .
H6_23 H 0.702412 0.074915 0.263977 0.070 Uiso 1 1 calc R U . . .
PA_24 P 0.4952(7) 0.3131(5) 0.3661(6) 0.0405(13) Uani 0.495(3) 1 d . . P D 1
C18A_24 C 0.6636(3) 0.3361(2) 0.4616(2) 0.0495(11) Uani 0.495(3) 1 d G . P D 1
H18A_24 H 0.628261 0.326790 0.498271 0.059 Uiso 0.495(3) 1 calc R U P D 1
C17A_24 C 0.7596(3) 0.3523(3) 0.4769(2) 0.0665(17) Uani 0.495(3) 1 d G . P D 1
H17A_24 H 0.788630 0.353791 0.523840 0.080 Uiso 0.495(3) 1 calc R U P D 1
C16A_24 C 0.8124(2) 0.3663(3) 0.4220(3) 0.079(2) Uani 0.495(3) 1 d G . P D 1
H16A_24 H 0.876666 0.377094 0.432280 0.095 Uiso 0.495(3) 1 calc R U P D 1
C15A_24 C 0.7690(4) 0.3641(3) 0.3519(3) 0.091(6) Uani 0.495(3) 1 d G . P D 1
H15A_24 H 0.804335 0.373397 0.315151 0.109 Uiso 0.495(3) 1 calc R U P D 1
C14A_24 C 0.6730(4) 0.3479(3) 0.3365(2) 0.0540(18) Uani 0.495(3) 1 d G . P D 1
H14A_24 H 0.643967 0.346396 0.289580 0.065 Uiso 0.495(3) 1 calc R U P D 1
C13A_24 C 0.6202(2) 0.3339(2) 0.3914(2) 0.0412(12) Uani 0.495(3) 1 d G . P D 1
C7A_24 C 0.4700(3) 0.41026(18) 0.3654(3) 0.0542(14) Uani 0.495(3) 1 d G . P D 1
C8A_24 C 0.3776(3) 0.4164(2) 0.3501(4) 0.099(4) Uani 0.495(3) 1 d G . P D 1
H8A_24 H 0.331667 0.373233 0.340284 0.119 Uiso 0.495(3) 1 calc R U P D 1
C9A_24 C 0.3538(3) 0.4870(3) 0.3495(4) 0.134(7) Uani 0.495(3) 1 d G . P D 1
H9A_24 H 0.292018 0.491092 0.339286 0.161 Uiso 0.495(3) 1 calc R U P D 1
C10A_24 C 0.4225(5) 0.5515(2) 0.3642(3) 0.096(3) Uani 0.495(3) 1 d G . P D 1
H10A_24 H 0.406556 0.598735 0.363771 0.115 Uiso 0.495(3) 1 calc R U P D 1
C11A_24 C 0.5148(4) 0.5454(2) 0.3794(3) 0.081(2) Uani 0.495(3) 1 d G . P D 1
H11A_24 H 0.560744 0.588519 0.389253 0.097 Uiso 0.495(3) 1 calc R U P D 1
C12A_24 C 0.5386(3) 0.4748(2) 0.3800(3) 0.0652(16) Uani 0.495(3) 1 d G . P D 1
H12A_24 H 0.600394 0.470659 0.390251 0.078 Uiso 0.495(3) 1 calc R U P D 1
C1A_24 C 0.4584(3) 0.2690(2) 0.44064(18) 0.0383(11) Uani 0.495(3) 1 d G . P D 1
C2A_24 C 0.3674(2) 0.2357(2) 0.44148(19) 0.0504(11) Uani 0.495(3) 1 d G . P D 1
H2A_24 H 0.322136 0.233720 0.402318 0.061 Uiso 0.495(3) 1 calc R U P D 1
C3A_24 C 0.3439(2) 0.2053(3) 0.5008(2) 0.0614(15) Uani 0.495(3) 1 d G . P D 1
H3A_24 H 0.282923 0.182957 0.501408 0.074 Uiso 0.495(3) 1 calc R U P D 1
C4A_24 C 0.4114(3) 0.2082(3) 0.5594(2) 0.068(2) Uani 0.495(3) 1 d G . P D 1
H4A_24 H 0.395719 0.187821 0.599102 0.081 Uiso 0.495(3) 1 calc R U P D 1
C5A_24 C 0.5025(3) 0.2415(3) 0.5585(2) 0.079(2) Uani 0.495(3) 1 d G . P D 1
H5A_24 H 0.547730 0.243449 0.597706 0.094 Uiso 0.495(3) 1 calc R U P D 1
C6A_24 C 0.5260(2) 0.2719(3) 0.4992(2) 0.0598(14) Uani 0.495(3) 1 d G . P D 1
H6A_24 H 0.586945 0.294213 0.498616 0.072 Uiso 0.495(3) 1 calc R U P D 1
PB_24 P 0.4839(7) 0.3063(4) 0.3596(5) 0.0350(8) Uani 0.505(3) 1 d . . P D 2
C18B_24 C 0.6344(3) 0.4149(3) 0.4393(3) 0.075(2) Uani 0.505(3) 1 d G . P D 2
H18B_24 H 0.592213 0.433330 0.468796 0.090 Uiso 0.505(3) 1 calc R U P D 2
C17B_24 C 0.7272(3) 0.4492(3) 0.4544(3) 0.096(3) Uani 0.505(3) 1 d G . P D 2
H17B_24 H 0.747137 0.490618 0.493911 0.115 Uiso 0.505(3) 1 calc R U P D 2
C16B_24 C 0.7903(2) 0.4217(3) 0.4103(4) 0.094(3) Uani 0.505(3) 1 d G . P D 2
H16B_24 H 0.852441 0.444663 0.420370 0.113 Uiso 0.505(3) 1 calc R U P D 2
C15B_24 C 0.7606(3) 0.3598(3) 0.3512(3) 0.073(4) Uani 0.505(3) 1 d G . P D 2
H15B_24 H 0.802820 0.341419 0.321715 0.088 Uiso 0.505(3) 1 calc R U P D 2
C14B_24 C 0.6678(4) 0.3255(3) 0.3361(3) 0.0514(16) Uani 0.505(3) 1 d G . P D 2
H14B_24 H 0.647896 0.284129 0.296598 0.062 Uiso 0.505(3) 1 calc R U P D 2
C13B_24 C 0.6047(2) 0.3530(2) 0.3802(3) 0.0442(12) Uani 0.505(3) 1 d G . P D 2
C7B_24 C 0.4272(3) 0.38793(16) 0.36385(19) 0.0402(9) Uani 0.505(3) 1 d G . P D 2
C8B_24 C 0.3827(3) 0.41716(19) 0.42237(17) 0.0528(12) Uani 0.505(3) 1 d G . P D 2
H8B_24 H 0.378195 0.393124 0.461519 0.063 Uiso 0.505(3) 1 calc R U P D 2
C9B_24 C 0.3449(3) 0.4823(2) 0.4224(2) 0.0639(16) Uani 0.505(3) 1 d G . P D 2
H9B_24 H 0.315148 0.501860 0.461543 0.077 Uiso 0.505(3) 1 calc R U P D 2
C10B_24 C 0.3516(3) 0.51823(19) 0.3639(3) 0.0628(17) Uani 0.505(3) 1 d G . P D 2
H10B_24 H 0.326352 0.561819 0.363891 0.075 Uiso 0.505(3) 1 calc R U P D 2
C11B_24 C 0.3961(3) 0.4890(2) 0.3054(2) 0.0697(19) Uani 0.505(3) 1 d G . P D 2
H11B_24 H 0.400602 0.513043 0.266214 0.084 Uiso 0.505(3) 1 calc R U P D 2
C12B_24 C 0.4339(3) 0.4239(2) 0.30534(18) 0.0558(13) Uani 0.505(3) 1 d G . P D 2
H12B_24 H 0.463650 0.404306 0.266189 0.067 Uiso 0.505(3) 1 calc R U P D 2
C1B_24 C 0.4529(3) 0.2929(3) 0.44910(19) 0.0496(16) Uani 0.505(3) 1 d G . P D 2
C2B_24 C 0.4538(4) 0.3504(2) 0.5107(3) 0.078(2) Uani 0.505(3) 1 d G . P D 2
H2B_24 H 0.468474 0.400985 0.507949 0.094 Uiso 0.505(3) 1 calc R U P D 2
C3B_24 C 0.4329(5) 0.3322(4) 0.5765(2) 0.116(5) Uani 0.505(3) 1 d G . P D 2
H3B_24 H 0.433512 0.370624 0.617738 0.139 Uiso 0.505(3) 1 calc R U P D 2
C4B_24 C 0.4110(5) 0.2565(4) 0.5807(2) 0.114(4) Uani 0.505(3) 1 d G . P D 2
H4B_24 H 0.396963 0.244339 0.624666 0.136 Uiso 0.505(3) 1 calc R U P D 2
C5B_24 C 0.4100(5) 0.1990(3) 0.5190(3) 0.100(3) Uani 0.505(3) 1 d G . P D 2
H5B_24 H 0.395375 0.148414 0.521804 0.120 Uiso 0.505(3) 1 calc R U P D 2
C6B_24 C 0.4310(4) 0.2172(2) 0.4532(3) 0.0709(19) Uani 0.505(3) 1 d G . P D 2
H6B_24 H 0.430337 0.178774 0.412013 0.085 Uiso 0.505(3) 1 calc R U P D 2
 
loop_
 _atom_site_aniso_label
 _atom_site_aniso_U_11
 _atom_site_aniso_U_22
 _atom_site_aniso_U_33
 _atom_site_aniso_U_23
 _atom_site_aniso_U_13
 _atom_site_aniso_U_12
O1_91 0.144(12) 0.126(11) 0.52(4) 0.028(16) -0.046(18) 0.030(9)
C1_91 0.104(8) 0.145(14) 0.094(8) 0.030(8) -0.021(6) -0.047(9)
C2_91 0.33(4) 0.138(19) 0.45(6) 0.17(3) 0.24(5) 0.10(2)
C3_91 0.29(3) 0.120(13) 0.133(14) 0.073(11) 0.026(17) 0.054(18)
C4_91 0.25(2) 0.190(18) 0.19(2) 0.135(17) 0.131(19) 0.113(18)
C1A_92 0.339(18) 0.166(12) 0.246(14) 0.104(11) 0.027(13) 0.015(12)
Cl1A_92 0.359(19) 0.185(14) 0.260(17) 0.112(11) -0.013(14) 0.024(13)
Cl2A_92 0.322(18) 0.153(10) 0.226(12) 0.109(9) 0.066(11) -0.013(10)
C1B_92 0.335(18) 0.160(12) 0.245(14) 0.103(11) 0.031(13) 0.019(12)
Cl1B_92 0.359(19) 0.183(14) 0.266(16) 0.099(12) 0.021(14) 0.023(12)
Cl2B_92 0.308(18) 0.130(8) 0.222(13) 0.084(8) 0.028(11) 0.038(9)
Pt_11 0.03334(4) 0.03953(4) 0.03742(4) 0.01102(3) 0.01111(3) 0.00834(3)
C9_12 0.123(4) 0.101(3) 0.113(4) 0.024(3) 0.077(3) 0.039(3)
C8_12 0.0694(18) 0.0633(17) 0.0530(16) 0.0074(12) 0.0207(14) 0.0114(14)
C7_12 0.0656(18) 0.0687(19) 0.0621(18) 0.0177(14) 0.0241(15) 0.0117(15)
C6_12 0.085(2) 0.073(2) 0.070(2) 0.0197(16) 0.0423(19) 0.0246(18)
C5_12 0.133(4) 0.072(2) 0.084(3) -0.011(2) 0.061(3) 0.001(2)
C4_12 0.093(3) 0.079(2) 0.070(2) -0.0121(18) 0.035(2) -0.013(2)
C3_12 0.0549(14) 0.0614(15) 0.0429(13) 0.0067(10) 0.0146(11) 0.0118(12)
S1_12 0.0472(3) 0.0797(5) 0.0437(3) 0.0069(3) 0.0111(3) 0.0138(3)
O1_12 0.0616(14) 0.121(2) 0.0689(16) -0.0154(15) 0.0180(12) -0.0166(15)
O2_12 0.0848(17) 0.114(2) 0.0552(13) 0.0277(14) 0.0165(12) 0.0582(16)
C1_12 0.0448(11) 0.0504(12) 0.0454(12) 0.0134(9) 0.0179(9) 0.0143(9)
C2_12 0.0361(9) 0.0528(12) 0.0414(11) 0.0167(9) 0.0110(8) 0.0111(8)
S2_12 0.0372(3) 0.0756(4) 0.0473(3) 0.0231(3) 0.0113(2) 0.0143(3)
O4_12 0.0520(11) 0.112(2) 0.0496(12) -0.0035(12) 0.0038(9) 0.0184(12)
O3_12 0.0520(11) 0.112(2) 0.0879(18) 0.0665(16) 0.0180(12) 0.0230(12)
C16_12 0.068(2) 0.160(5) 0.098(3) 0.056(3) 0.048(2) 0.039(3)
C15_12 0.0578(16) 0.0595(17) 0.077(2) 0.0160(15) 0.0268(15) 0.0077(13)
C14_12 0.0631(19) 0.080(2) 0.095(3) 0.035(2) 0.0346(19) 0.0073(17)
C13_12 0.0496(15) 0.101(3) 0.074(2) 0.0396(19) 0.0266(15) 0.0262(16)
C12_12 0.082(3) 0.088(3) 0.122(4) 0.032(2) 0.059(3) 0.047(2)
C11_12 0.071(2) 0.0651(19) 0.111(3) 0.037(2) 0.045(2) 0.0295(16)
C10_12 0.0365(10) 0.0623(15) 0.0552(14) 0.0216(11) 0.0136(10) 0.0148(10)
P_13 0.0365(2) 0.0410(3) 0.0352(3) 0.00786(19) 0.0069(2) 0.0065(2)
C18_13 0.0620(15) 0.0511(13) 0.0482(14) 0.0026(10) 0.0021(12) 0.0199(12)
C17_13 0.080(2) 0.0644(18) 0.0604(18) 0.0101(14) 0.0071(16) 0.0378(16)
C16_13 0.0590(17) 0.085(2) 0.074(2) 0.0242(18) 0.0050(16) 0.0351(17)
C15_13 0.0457(14) 0.077(2) 0.085(3) 0.0243(18) -0.0041(15) 0.0118(14)
C14_13 0.0440(12) 0.0489(13) 0.0630(17) 0.0112(11) 0.0012(11) 0.0078(10)
C13_13 0.0417(10) 0.0453(11) 0.0377(10) 0.0084(8) 0.0081(8) 0.0112(8)
C7_13 0.0403(10) 0.0417(10) 0.0442(12) 0.0094(8) 0.0064(9) 0.0047(8)
C8_13 0.0559(14) 0.0497(13) 0.0494(14) 0.0077(10) -0.0008(11) -0.0013(11)
C9_13 0.0651(18) 0.0586(17) 0.071(2) 0.0123(15) -0.0102(16) -0.0107(14)
C10_13 0.0653(19) 0.0615(18) 0.087(3) 0.0245(17) 0.0051(18) -0.0124(15)
C11_13 0.0639(17) 0.0590(16) 0.0683(19) 0.0255(14) 0.0161(15) 0.0006(13)
C12_13 0.0505(13) 0.0519(13) 0.0466(13) 0.0150(10) 0.0069(10) 0.0039(10)
C1_13 0.0498(12) 0.0525(13) 0.0362(11) 0.0106(9) 0.0034(9) 0.0008(10)
C2_13 0.075(2) 0.082(2) 0.0596(19) 0.0288(17) 0.0029(16) 0.0189(18)
C3_13 0.108(4) 0.109(3) 0.072(3) 0.045(3) -0.018(3) 0.014(3)
C4_13 0.131(4) 0.101(3) 0.0458(19) 0.0220(19) 0.004(2) -0.011(3)
C5_13 0.108(3) 0.096(3) 0.0428(16) 0.0083(16) 0.0226(19) 0.007(2)
C6_13 0.0726(19) 0.079(2) 0.0431(14) 0.0103(13) 0.0168(14) 0.0159(16)
P_14 0.0388(2) 0.0380(3) 0.0463(3) 0.0104(2) 0.0148(2) 0.0077(2)
C18_14 0.109(3) 0.0658(19) 0.074(2) 0.0268(16) 0.054(2) 0.040(2)
C17_14 0.112(3) 0.070(2) 0.078(2) 0.0155(18) 0.058(2) 0.022(2)
C16_14 0.086(3) 0.107(3) 0.0580(19) 0.0258(19) 0.0340(19) 0.013(2)
C15_14 0.134(5) 0.232(7) 0.096(3) 0.101(4) 0.072(3) 0.115(5)
C14_14 0.102(3) 0.150(4) 0.077(3) 0.064(3) 0.051(2) 0.073(3)
C13_14 0.0463(11) 0.0468(12) 0.0517(13) 0.0147(10) 0.0188(10) 0.0046(9)
C7_14 0.0487(12) 0.0439(11) 0.0568(14) 0.0138(10) 0.0193(11) 0.0143(9)
C8_14 0.0645(18) 0.0477(15) 0.097(3) -0.0023(15) 0.0118(18) 0.0155(13)
C9_14 0.100(3) 0.0521(19) 0.136(4) -0.011(2) 0.026(3) 0.024(2)
C10_14 0.110(3) 0.070(2) 0.115(4) 0.019(2) 0.046(3) 0.052(2)
C11_14 0.072(2) 0.082(2) 0.089(3) 0.033(2) 0.0320(19) 0.0424(19)
C12_14 0.0534(14) 0.0641(17) 0.0689(19) 0.0225(14) 0.0199(13) 0.0209(13)
C1_14 0.0400(10) 0.0444(11) 0.0585(15) 0.0069(10) 0.0124(10) 0.0098(9)
C2_14 0.0511(14) 0.0623(17) 0.0626(18) 0.0140(13) 0.0049(13) 0.0080(12)
C3_14 0.070(2) 0.092(3) 0.075(3) 0.014(2) -0.0076(19) 0.022(2)
C4_14 0.0515(17) 0.100(3) 0.096(3) 0.004(2) -0.0059(19) 0.0198(19)
C5_14 0.0417(15) 0.099(3) 0.112(4) 0.005(3) 0.0125(18) 0.0042(17)
C6_14 0.0445(14) 0.078(2) 0.085(2) 0.0183(18) 0.0143(15) 0.0032(14)
Pt_21 0.03103(3) 0.03933(4) 0.03345(4) 0.00618(3) 0.00584(3) 0.00910(3)
C9_22 0.063(2) 0.150(5) 0.066(3) 0.004(3) -0.0153(19) 0.009(3)
C8_22 0.0617(18) 0.0575(17) 0.089(3) 0.0108(16) -0.0178(17) 0.0065(14)
C7_22 0.063(2) 0.069(2) 0.097(3) -0.0014(19) -0.018(2) 0.0041(16)
C6_22 0.0425(13) 0.101(3) 0.0518(16) 0.0052(16) 0.0030(12) 0.0161(15)
C5_22 0.0565(17) 0.094(3) 0.065(2) 0.0312(18) -0.0005(15) 0.0132(17)
C4_22 0.0527(14) 0.0692(18) 0.0597(17) 0.0228(14) 0.0015(13) 0.0079(13)
C3_22 0.0339(9) 0.0561(13) 0.0437(12) 0.0086(9) 0.0071(8) 0.0127(9)
S1_22 0.0362(2) 0.0562(3) 0.0374(3) 0.0078(2) 0.0097(2) 0.0117(2)
O1_22 0.0543(11) 0.0864(16) 0.0531(12) -0.0127(10) 0.0156(9) 0.0220(11)
O2_22 0.0510(10) 0.0811(15) 0.0610(13) 0.0365(11) 0.0061(9) 0.0041(10)
C1_22 0.0354(9) 0.0426(10) 0.0386(10) 0.0088(8) 0.0083(8) 0.0108(7)
C2_22 0.0356(9) 0.0459(10) 0.0324(9) 0.0064(7) 0.0049(7) 0.0123(8)
S2_22 0.0408(3) 0.0703(4) 0.0358(3) 0.0099(2) 0.0107(2) 0.0149(3)
O4_22 0.0535(11) 0.128(2) 0.0465(11) 0.0090(12) 0.0135(9) 0.0459(13)
O3_22 0.0723(14) 0.0759(15) 0.0580(13) 0.0188(11) 0.0176(11) -0.0072(12)
C16_22 0.074(3) 0.190(6) 0.054(2) 0.022(3) -0.008(2) 0.002(3)
C15_22 0.070(2) 0.072(2) 0.063(2) -0.0003(15) -0.0051(16) 0.0271(16)
C14_22 0.077(2) 0.091(3) 0.067(2) -0.0102(19) -0.0076(19) 0.016(2)
C13_22 0.0560(17) 0.125(3) 0.0395(15) 0.0153(17) 0.0040(13) 0.0148(19)
C12_22 0.0608(18) 0.110(3) 0.0575(19) 0.0313(19) 0.0001(15) 0.0300(19)
C11_22 0.0607(16) 0.077(2) 0.0556(17) 0.0209(14) 0.0073(13) 0.0281(15)
C10_22 0.0455(11) 0.0645(15) 0.0347(11) 0.0113(9) 0.0090(9) 0.0198(10)
P_23 0.0325(2) 0.0413(3) 0.0347(2) 0.00629(19) 0.00681(19) 0.01079(19)
C18_23 0.0675(19) 0.074(2) 0.0615(19) 0.0316(16) 0.0097(15) 0.0072(15)
C17_23 0.089(3) 0.108(3) 0.086(3) 0.062(3) 0.020(2) 0.020(2)
C16_23 0.091(3) 0.133(4) 0.058(2) 0.050(2) 0.018(2) 0.052(3)
C15_23 0.086(2) 0.102(3) 0.0448(17) 0.0157(17) -0.0067(16) 0.029(2)
C14_23 0.080(2) 0.0623(17) 0.0444(15) 0.0086(12) -0.0075(14) 0.0169(15)
C13_23 0.0457(11) 0.0526(12) 0.0387(11) 0.0122(9) 0.0091(9) 0.0180(9)
C7_23 0.0405(10) 0.0425(10) 0.0387(10) 0.0041(8) 0.0073(8) 0.0117(8)
C8_23 0.0543(14) 0.0529(13) 0.0467(13) 0.0000(10) 0.0144(11) 0.0136(11)
C9_23 0.077(2) 0.0562(16) 0.0513(16) -0.0090(12) 0.0106(14) 0.0148(14)
C10_23 0.074(2) 0.0540(16) 0.065(2) -0.0102(13) -0.0054(16) 0.0080(14)
C11_23 0.0481(13) 0.0538(15) 0.0708(19) -0.0007(13) 0.0028(13) 0.0044(11)
C12_23 0.0410(10) 0.0473(12) 0.0515(13) 0.0038(9) 0.0082(10) 0.0084(9)
C1_23 0.0334(9) 0.0555(13) 0.0419(11) 0.0058(9) 0.0086(8) 0.0093(8)
C2_23 0.0440(12) 0.086(2) 0.0561(16) 0.0268(15) 0.0142(12) 0.0094(13)
C3_23 0.0603(19) 0.117(3) 0.073(2) 0.031(2) 0.0292(18) 0.002(2)
C4_23 0.0426(14) 0.121(3) 0.077(2) -0.001(2) 0.0245(16) 0.0065(18)
C5_23 0.0412(13) 0.095(3) 0.085(2) -0.006(2) 0.0140(15) 0.0244(15)
C6_23 0.0419(12) 0.0662(17) 0.0691(19) 0.0081(14) 0.0110(12) 0.0206(12)
PA_24 0.038(2) 0.0458(19) 0.0316(12) -0.0049(10) 0.0050(15) 0.0053(14)
C18A_24 0.047(2) 0.050(3) 0.045(3) -0.0003(19) 0.002(2) 0.007(2)
C17A_24 0.055(3) 0.061(3) 0.072(4) -0.003(3) -0.011(3) 0.009(3)
C16A_24 0.044(3) 0.075(5) 0.106(7) 0.004(4) 0.001(4) 0.001(3)
C15A_24 0.045(5) 0.060(7) 0.175(17) 0.038(9) 0.036(7) 0.005(4)
C14A_24 0.059(4) 0.038(4) 0.066(4) 0.011(2) 0.025(3) 0.001(3)
C13A_24 0.039(2) 0.037(2) 0.045(3) 0.0030(19) 0.0095(19) 0.0049(18)
C7A_24 0.058(3) 0.047(3) 0.049(3) -0.010(2) 0.000(3) 0.017(2)
C8A_24 0.059(4) 0.065(4) 0.145(9) -0.034(5) -0.020(5) 0.024(3)
C9A_24 0.102(8) 0.077(6) 0.184(14) -0.052(8) -0.059(8) 0.056(6)
C10A_24 0.148(9) 0.073(5) 0.065(5) -0.006(4) -0.013(5) 0.062(6)
C11A_24 0.120(7) 0.055(4) 0.068(5) 0.011(3) 0.012(5) 0.020(4)
C12A_24 0.072(4) 0.052(3) 0.071(4) 0.011(3) 0.010(3) 0.015(3)
C1A_24 0.043(2) 0.031(2) 0.038(2) 0.0015(17) 0.0060(18) 0.0079(18)
C2A_24 0.051(3) 0.051(3) 0.049(3) 0.015(2) 0.008(2) 0.002(2)
C3A_24 0.068(4) 0.055(3) 0.065(4) 0.019(3) 0.022(3) 0.008(3)
C4A_24 0.091(5) 0.069(4) 0.054(4) 0.028(3) 0.021(4) 0.021(4)
C5A_24 0.093(6) 0.102(6) 0.051(4) 0.034(4) 0.005(4) 0.028(5)
C6A_24 0.051(3) 0.078(4) 0.051(3) 0.016(3) 0.002(2) 0.015(3)
PB_24 0.0313(15) 0.0346(11) 0.037(2) 0.0026(14) 0.0045(12) 0.0053(12)
C18B_24 0.052(3) 0.066(4) 0.084(5) -0.019(3) -0.001(3) -0.002(3)
C17B_24 0.062(4) 0.074(5) 0.121(8) -0.007(5) -0.017(4) -0.020(4)
C16B_24 0.044(3) 0.072(5) 0.155(9) 0.026(5) -0.003(4) -0.014(3)
C15B_24 0.053(5) 0.080(9) 0.083(8) 0.016(6) 0.028(5) -0.004(5)
C14B_24 0.042(3) 0.034(3) 0.075(4) 0.007(2) 0.014(2) 0.003(2)
C13B_24 0.039(2) 0.036(2) 0.053(3) 0.005(2) 0.002(2) -0.0012(19)
C7B_24 0.041(2) 0.0321(19) 0.043(2) 0.0021(16) 0.0036(19) 0.0056(16)
C8B_24 0.064(3) 0.038(2) 0.055(3) 0.0015(19) 0.015(2) 0.014(2)
C9B_24 0.067(4) 0.046(3) 0.078(4) 0.000(3) 0.018(3) 0.020(3)
C10B_24 0.059(3) 0.035(3) 0.092(5) 0.008(3) 0.001(3) 0.012(2)
C11B_24 0.081(5) 0.046(3) 0.085(5) 0.024(3) 0.003(4) 0.016(3)
C12B_24 0.064(3) 0.047(3) 0.058(3) 0.012(2) 0.010(3) 0.014(2)
C1B_24 0.042(3) 0.063(4) 0.033(2) -0.004(2) 0.0091(19) -0.005(2)
C2B_24 0.068(4) 0.095(5) 0.053(3) -0.018(3) 0.026(3) -0.012(4)
C3B_24 0.106(7) 0.156(10) 0.050(4) -0.026(5) 0.035(4) -0.037(7)
C4B_24 0.097(7) 0.176(12) 0.052(4) 0.024(6) 0.022(4) -0.028(8)
C5B_24 0.108(8) 0.110(8) 0.079(6) 0.032(5) 0.035(6) -0.021(6)
C6B_24 0.066(4) 0.083(5) 0.053(3) 0.002(3) 0.020(3) -0.009(3)
 
_geom_special_details
;
 All esds (except the esd in the dihedral angle between two l.s. planes)
 are estimated using the full covariance matrix.  The cell esds are taken
 into account individually in the estimation of esds in distances, angles
 and torsion angles; correlations between esds in cell parameters are only
 used when they are defined by crystal symmetry.  An approximate (isotropic)
 treatment of cell esds is used for estimating esds involving l.s. planes.
;
 
loop_
 _geom_bond_atom_site_label_1
 _geom_bond_atom_site_label_2
 _geom_bond_distance
 _geom_bond_site_symmetry_2
 _geom_bond_publ_flag
O1_91 C2_91 1.418(8) . ?
O1_91 C3_91 1.425(8) . ?
C1_91 C2_91 1.475(8) . ?
C1_91 H1A_91 0.9600 . ?
C1_91 H1B_91 0.9600 . ?
C1_91 H1C_91 0.9600 . ?
C2_91 H2A_91 0.9700 . ?
C2_91 H2B_91 0.9700 . ?
C3_91 C4_91 1.472(8) . ?
C3_91 H3A_91 0.9700 . ?
C3_91 H3B_91 0.9700 . ?
C4_91 H4A_91 0.9600 . ?
C4_91 H4B_91 0.9600 . ?
C4_91 H4A3_91 0.9600 . ?
C1A_92 Cl2A_92 1.744(10) . ?
C1A_92 Cl1A_92 1.745(10) . ?
C1A_92 H1A_92 0.9700 . ?
C1A_92 H1B_92 0.9700 . ?
C1B_92 Cl1B_92 1.739(14) . ?
C1B_92 Cl2B_92 1.742(14) . ?
C1B_92 H1C_92 0.9700 . ?
C1B_92 H1D_92 0.9700 . ?
Pt_11 C2_12 2.067(2) . ?
Pt_11 C1_12 2.094(2) . ?
Pt_11 P_14 2.2871(9) . ?
Pt_11 P_13 2.2921(10) . ?
C9_12 C6_12 1.525(4) . ?
C9_12 H9A_12 0.9600 . ?
C9_12 H9B_12 0.9600 . ?
C9_12 H9C_12 0.9600 . ?
C8_12 C7_12 1.3900 . ?
C8_12 C3_12 1.3900 . ?
C8_12 H8_12 0.9300 . ?
C7_12 C6_12 1.3900 . ?
C7_12 H7_12 0.9300 . ?
C6_12 C5_12 1.3900 . ?
C5_12 C4_12 1.3900 . ?
C5_12 H5_12 0.9300 . ?
C4_12 C3_12 1.3900 . ?
C4_12 H4_12 0.9300 . ?
C3_12 S1_12 1.7695(16) . ?
S1_12 O2_12 1.427(3) . ?
S1_12 O1_12 1.446(3) . ?
S1_12 C1_12 1.749(3) . ?
C1_12 C2_12 1.453(4) . ?
C1_12 H1_12 0.9800 . ?
C2_12 S2_12 1.762(2) . ?
C2_12 H2_12 0.9800 . ?
S2_12 O4_12 1.428(3) . ?
S2_12 O3_12 1.440(3) . ?
S2_12 C10_12 1.7579(15) . ?
C16_12 C13_12 1.516(4) . ?
C16_12 H16A_12 0.9600 . ?
C16_12 H16B_12 0.9600 . ?
C16_12 H16C_12 0.9600 . ?
C15_12 C14_12 1.3900 . ?
C15_12 C10_12 1.3900 . ?
C15_12 H15_12 0.9300 . ?
C14_12 C13_12 1.3900 . ?
C14_12 H14_12 0.9300 . ?
C13_12 C12_12 1.3900 . ?
C12_12 C11_12 1.3900 . ?
C12_12 H12_12 0.9300 . ?
C11_12 C10_12 1.3900 . ?
C11_12 H11_12 0.9300 . ?
P_13 C1_13 1.8250(15) . ?
P_13 C7_13 1.8280(14) . ?
P_13 C13_13 1.8429(14) . ?
C18_13 C17_13 1.3900 . ?
C18_13 C13_13 1.3900 . ?
C18_13 H18_13 0.9300 . ?
C17_13 C16_13 1.3900 . ?
C17_13 H17_13 0.9300 . ?
C16_13 C15_13 1.3900 . ?
C16_13 H16_13 0.9300 . ?
C15_13 C14_13 1.3900 . ?
C15_13 H15_13 0.9300 . ?
C14_13 C13_13 1.3900 . ?
C14_13 H14_13 0.9300 . ?
C7_13 C8_13 1.3900 . ?
C7_13 C12_13 1.3900 . ?
C8_13 C9_13 1.3900 . ?
C8_13 H8_13 0.9300 . ?
C9_13 C10_13 1.3900 . ?
C9_13 H9_13 0.9300 . ?
C10_13 C11_13 1.3900 . ?
C10_13 H10_13 0.9300 . ?
C11_13 C12_13 1.3900 . ?
C11_13 H11_13 0.9300 . ?
C12_13 H12_13 0.9300 . ?
C1_13 C2_13 1.3900 . ?
C1_13 C6_13 1.3900 . ?
C2_13 C3_13 1.3900 . ?
C2_13 H2_13 0.9300 . ?
C3_13 C4_13 1.3900 . ?
C3_13 H3_13 0.9300 . ?
C4_13 C5_13 1.3900 . ?
C4_13 H4_13 0.9300 . ?
C5_13 C6_13 1.3900 . ?
C5_13 H5_13 0.9300 . ?
C6_13 H6_13 0.9300 . ?
P_14 C1_14 1.8252(17) . ?
P_14 C7_14 1.8320(15) . ?
P_14 C13_14 1.8424(16) . ?
C18_14 C17_14 1.3900 . ?
C18_14 C13_14 1.3900 . ?
C18_14 H18_14 0.9300 . ?
C17_14 C16_14 1.3900 . ?
C17_14 H17_14 0.9300 . ?
C16_14 C15_14 1.3900 . ?
C16_14 H16_14 0.9300 . ?
C15_14 C14_14 1.3900 . ?
C15_14 H15_14 0.9300 . ?
C14_14 C13_14 1.3900 . ?
C14_14 H14_14 0.9300 . ?
C7_14 C8_14 1.3900 . ?
C7_14 C12_14 1.3900 . ?
C8_14 C9_14 1.3900 . ?
C8_14 H8_14 0.9300 . ?
C9_14 C10_14 1.3900 . ?
C9_14 H9_14 0.9300 . ?
C10_14 C11_14 1.3900 . ?
C10_14 H10_14 0.9300 . ?
C11_14 C12_14 1.3900 . ?
C11_14 H11_14 0.9300 . ?
C12_14 H12_14 0.9300 . ?
C1_14 C2_14 1.3900 . ?
C1_14 C6_14 1.3900 . ?
C2_14 C3_14 1.3900 . ?
C2_14 H2_14 0.9300 . ?
C3_14 C4_14 1.3900 . ?
C3_14 H3_14 0.9300 . ?
C4_14 C5_14 1.3900 . ?
C4_14 H4_14 0.9300 . ?
C5_14 C6_14 1.3900 . ?
C5_14 H5_14 0.9300 . ?
C6_14 H6_14 0.9300 . ?
Pt_21 C2_22 2.063(2) . ?
Pt_21 C1_22 2.099(2) . ?
Pt_21 PB_24 2.213(10) . ?
Pt_21 P_23 2.2902(8) . ?
Pt_21 PA_24 2.378(10) . ?
C9_22 C6_22 1.521(4) . ?
C9_22 H9A_22 0.9600 . ?
C9_22 H9B_22 0.9600 . ?
C9_22 H9C_22 0.9600 . ?
C8_22 C7_22 1.3900 . ?
C8_22 C3_22 1.3900 . ?
C8_22 H8_22 0.9300 . ?
C7_22 C6_22 1.3900 . ?
C7_22 H7_22 0.9300 . ?
C6_22 C5_22 1.3900 . ?
C5_22 C4_22 1.3900 . ?
C5_22 H5_22 0.9300 . ?
C4_22 C3_22 1.3900 . ?
C4_22 H4_22 0.9300 . ?
C3_22 S1_22 1.7669(16) . ?
S1_22 O1_22 1.433(2) . ?
S1_22 O2_22 1.436(2) . ?
S1_22 C1_22 1.750(2) . ?
C1_22 C2_22 1.454(3) . ?
C1_22 H1_22 0.9800 . ?
C2_22 S2_22 1.752(2) . ?
C2_22 H2_22 0.9800 . ?
S2_22 O3_22 1.431(3) . ?
S2_22 O4_22 1.437(2) . ?
S2_22 C10_22 1.7464(17) . ?
C16_22 C13_22 1.508(5) . ?
C16_22 H16A_22 0.9600 . ?
C16_22 H16B_22 0.9600 . ?
C16_22 H16C_22 0.9600 . ?
C15_22 C14_22 1.3900 . ?
C15_22 C10_22 1.3900 . ?
C15_22 H15_22 0.9300 . ?
C14_22 C13_22 1.3900 . ?
C14_22 H14_22 0.9300 . ?
C13_22 C12_22 1.3900 . ?
C12_22 C11_22 1.3900 . ?
C12_22 H12_22 0.9300 . ?
C11_22 C10_22 1.3900 . ?
C11_22 H11_22 0.9300 . ?
P_23 C13_23 1.8273(15) . ?
P_23 C1_23 1.8277(14) . ?
P_23 C7_23 1.8376(15) . ?
C18_23 C17_23 1.3900 . ?
C18_23 C13_23 1.3900 . ?
C18_23 H18_23 0.9300 . ?
C17_23 C16_23 1.3900 . ?
C17_23 H17_23 0.9300 . ?
C16_23 C15_23 1.3900 . ?
C16_23 H16_23 0.9300 . ?
C15_23 C14_23 1.3900 . ?
C15_23 H15_23 0.9300 . ?
C14_23 C13_23 1.3900 . ?
C14_23 H14_23 0.9300 . ?
C7_23 C8_23 1.3900 . ?
C7_23 C12_23 1.3900 . ?
C8_23 C9_23 1.3900 . ?
C8_23 H8_23 0.9300 . ?
C9_23 C10_23 1.3900 . ?
C9_23 H9_23 0.9300 . ?
C10_23 C11_23 1.3900 . ?
C10_23 H10_23 0.9300 . ?
C11_23 C12_23 1.3900 . ?
C11_23 H11_23 0.9300 . ?
C12_23 H12_23 0.9300 . ?
C1_23 C2_23 1.3900 . ?
C1_23 C6_23 1.3900 . ?
C2_23 C3_23 1.3900 . ?
C2_23 H2_23 0.9300 . ?
C3_23 C4_23 1.3900 . ?
C3_23 H3_23 0.9300 . ?
C4_23 C5_23 1.3900 . ?
C4_23 H4_23 0.9300 . ?
C5_23 C6_23 1.3900 . ?
C5_23 H5_23 0.9300 . ?
C6_23 H6_23 0.9300 . ?
PA_24 C13A_24 1.817(10) . ?
PA_24 C1A_24 1.834(10) . ?
PA_24 C7A_24 1.872(9) . ?
C18A_24 C17A_24 1.3900 . ?
C18A_24 C13A_24 1.3900 . ?
C18A_24 H18A_24 0.9300 . ?
C17A_24 C16A_24 1.3900 . ?
C17A_24 H17A_24 0.9300 . ?
C16A_24 C15A_24 1.3900 . ?
C16A_24 H16A_24 0.9300 . ?
C15A_24 C14A_24 1.3900 . ?
C15A_24 H15A_24 0.9300 . ?
C14A_24 C13A_24 1.3900 . ?
C14A_24 H14A_24 0.9300 . ?
C7A_24 C8A_24 1.3900 . ?
C7A_24 C12A_24 1.3900 . ?
C8A_24 C9A_24 1.3900 . ?
C8A_24 H8A_24 0.9300 . ?
C9A_24 C10A_24 1.3900 . ?
C9A_24 H9A_24 0.9300 . ?
C10A_24 C11A_24 1.3900 . ?
C10A_24 H10A_24 0.9300 . ?
C11A_24 C12A_24 1.3900 . ?
C11A_24 H11A_24 0.9300 . ?
C12A_24 H12A_24 0.9300 . ?
C1A_24 C2A_24 1.3900 . ?
C1A_24 C6A_24 1.3900 . ?
C2A_24 C3A_24 1.3900 . ?
C2A_24 H2A_24 0.9300 . ?
C3A_24 C4A_24 1.3900 . ?
C3A_24 H3A_24 0.9300 . ?
C4A_24 C5A_24 1.3900 . ?
C4A_24 H4A_24 0.9300 . ?
C5A_24 C6A_24 1.3900 . ?
C5A_24 H5A_24 0.9300 . ?
C6A_24 H6A_24 0.9300 . ?
PB_24 C7B_24 1.811(8) . ?
PB_24 C13B_24 1.820(10) . ?
PB_24 C1B_24 1.832(10) . ?
C18B_24 C17B_24 1.3900 . ?
C18B_24 C13B_24 1.3900 . ?
C18B_24 H18B_24 0.9300 . ?
C17B_24 C16B_24 1.3900 . ?
C17B_24 H17B_24 0.9300 . ?
C16B_24 C15B_24 1.3900 . ?
C16B_24 H16B_24 0.9300 . ?
C15B_24 C14B_24 1.3900 . ?
C15B_24 H15B_24 0.9300 . ?
C14B_24 C13B_24 1.3900 . ?
C14B_24 H14B_24 0.9300 . ?
C7B_24 C8B_24 1.3900 . ?
C7B_24 C12B_24 1.3900 . ?
C8B_24 C9B_24 1.3900 . ?
C8B_24 H8B_24 0.9300 . ?
C9B_24 C10B_24 1.3900 . ?
C9B_24 H9B_24 0.9300 . ?
C10B_24 C11B_24 1.3900 . ?
C10B_24 H10B_24 0.9300 . ?
C11B_24 C12B_24 1.3900 . ?
C11B_24 H11B_24 0.9300 . ?
C12B_24 H12B_24 0.9300 . ?
C1B_24 C2B_24 1.3900 . ?
C1B_24 C6B_24 1.3900 . ?
C2B_24 C3B_24 1.3900 . ?
C2B_24 H2B_24 0.9300 . ?
C3B_24 C4B_24 1.3900 . ?
C3B_24 H3B_24 0.9300 . ?
C4B_24 C5B_24 1.3900 . ?
C4B_24 H4B_24 0.9300 . ?
C5B_24 C6B_24 1.3900 . ?
C5B_24 H5B_24 0.9300 . ?
C6B_24 H6B_24 0.9300 . ?
 
loop_
 _geom_angle_atom_site_label_1
 _geom_angle_atom_site_label_2
 _geom_angle_atom_site_label_3
 _geom_angle
 _geom_angle_site_symmetry_1
 _geom_angle_site_symmetry_3
 _geom_angle_publ_flag
C2_91 O1_91 C3_91 115.0(10) . . ?
C2_91 C1_91 H1A_91 109.5 . . ?
C2_91 C1_91 H1B_91 109.5 . . ?
H1A_91 C1_91 H1B_91 109.5 . . ?
C2_91 C1_91 H1C_91 109.5 . . ?
H1A_91 C1_91 H1C_91 109.5 . . ?
H1B_91 C1_91 H1C_91 109.5 . . ?
O1_91 C2_91 C1_91 109.8(9) . . ?
O1_91 C2_91 H2A_91 109.7 . . ?
C1_91 C2_91 H2A_91 109.7 . . ?
O1_91 C2_91 H2B_91 109.7 . . ?
C1_91 C2_91 H2B_91 109.7 . . ?
H2A_91 C2_91 H2B_91 108.2 . . ?
O1_91 C3_91 C4_91 108.2(8) . . ?
O1_91 C3_91 H3A_91 110.1 . . ?
C4_91 C3_91 H3A_91 110.0 . . ?
O1_91 C3_91 H3B_91 110.1 . . ?
C4_91 C3_91 H3B_91 110.1 . . ?
H3A_91 C3_91 H3B_91 108.4 . . ?
C3_91 C4_91 H4A_91 109.5 . . ?
C3_91 C4_91 H4B_91 109.5 . . ?
H4A_91 C4_91 H4B_91 109.5 . . ?
C3_91 C4_91 H4A3_91 109.5 . . ?
H4A_91 C4_91 H4A3_91 109.5 . . ?
H4B_91 C4_91 H4A3_91 109.5 . . ?
Cl2A_92 C1A_92 Cl1A_92 110.5(9) . . ?
Cl2A_92 C1A_92 H1A_92 109.5 . . ?
Cl1A_92 C1A_92 H1A_92 109.5 . . ?
Cl2A_92 C1A_92 H1B_92 109.6 . . ?
Cl1A_92 C1A_92 H1B_92 109.6 . . ?
H1A_92 C1A_92 H1B_92 108.1 . . ?
Cl1B_92 C1B_92 Cl2B_92 110.9(14) . . ?
Cl1B_92 C1B_92 H1C_92 109.4 . . ?
Cl2B_92 C1B_92 H1C_92 109.5 . . ?
Cl1B_92 C1B_92 H1D_92 109.5 . . ?
Cl2B_92 C1B_92 H1D_92 109.5 . . ?
H1C_92 C1B_92 H1D_92 108.1 . . ?
C2_12 Pt_11 C1_12 40.87(10) . . ?
C2_12 Pt_11 P_14 145.28(7) . . ?
C1_12 Pt_11 P_14 106.29(8) . . ?
C2_12 Pt_11 P_13 106.68(8) . . ?
C1_12 Pt_11 P_13 146.63(7) . . ?
P_14 Pt_11 P_13 107.04(3) . . ?
C6_12 C9_12 H9A_12 109.5 . . ?
C6_12 C9_12 H9B_12 109.5 . . ?
H9A_12 C9_12 H9B_12 109.5 . . ?
C6_12 C9_12 H9C_12 109.5 . . ?
H9A_12 C9_12 H9C_12 109.5 . . ?
H9B_12 C9_12 H9C_12 109.5 . . ?
C7_12 C8_12 C3_12 120.0 . . ?
C7_12 C8_12 H8_12 120.0 . . ?
C3_12 C8_12 H8_12 120.0 . . ?
C6_12 C7_12 C8_12 120.0 . . ?
C6_12 C7_12 H7_12 120.0 . . ?
C8_12 C7_12 H7_12 120.0 . . ?
C5_12 C6_12 C7_12 120.0 . . ?
C5_12 C6_12 C9_12 120.2(3) . . ?
C7_12 C6_12 C9_12 119.8(3) . . ?
C6_12 C5_12 C4_12 120.0 . . ?
C6_12 C5_12 H5_12 120.0 . . ?
C4_12 C5_12 H5_12 120.0 . . ?
C3_12 C4_12 C5_12 120.0 . . ?
C3_12 C4_12 H4_12 120.0 . . ?
C5_12 C4_12 H4_12 120.0 . . ?
C4_12 C3_12 C8_12 120.0 . . ?
C4_12 C3_12 S1_12 119.19(12) . . ?
C8_12 C3_12 S1_12 120.81(12) . . ?
O2_12 S1_12 O1_12 118.7(2) . . ?
O2_12 S1_12 C1_12 108.17(15) . . ?
O1_12 S1_12 C1_12 108.46(17) . . ?
O2_12 S1_12 C3_12 106.98(15) . . ?
O1_12 S1_12 C3_12 106.93(14) . . ?
C1_12 S1_12 C3_12 107.02(12) . . ?
C2_12 C1_12 S1_12 117.77(19) . . ?
C2_12 C1_12 Pt_11 68.54(13) . . ?
S1_12 C1_12 Pt_11 113.53(13) . . ?
C2_12 C1_12 H1_12 116.1 . . ?
S1_12 C1_12 H1_12 116.1 . . ?
Pt_11 C1_12 H1_12 116.1 . . ?
C1_12 C2_12 S2_12 116.74(18) . . ?
C1_12 C2_12 Pt_11 70.59(13) . . ?
S2_12 C2_12 Pt_11 113.13(12) . . ?
C1_12 C2_12 H2_12 116.2 . . ?
S2_12 C2_12 H2_12 116.2 . . ?
Pt_11 C2_12 H2_12 116.2 . . ?
O4_12 S2_12 O3_12 119.42(18) . . ?
O4_12 S2_12 C10_12 107.51(14) . . ?
O3_12 S2_12 C10_12 107.44(13) . . ?
O4_12 S2_12 C2_12 108.68(14) . . ?
O3_12 S2_12 C2_12 108.59(14) . . ?
C10_12 S2_12 C2_12 104.15(11) . . ?
C13_12 C16_12 H16A_12 109.5 . . ?
C13_12 C16_12 H16B_12 109.5 . . ?
H16A_12 C16_12 H16B_12 109.5 . . ?
C13_12 C16_12 H16C_12 109.5 . . ?
H16A_12 C16_12 H16C_12 109.5 . . ?
H16B_12 C16_12 H16C_12 109.5 . . ?
C14_12 C15_12 C10_12 120.0 . . ?
C14_12 C15_12 H15_12 120.0 . . ?
C10_12 C15_12 H15_12 120.0 . . ?
C13_12 C14_12 C15_12 120.0 . . ?
C13_12 C14_12 H14_12 120.0 . . ?
C15_12 C14_12 H14_12 120.0 . . ?
C14_12 C13_12 C12_12 120.0 . . ?
C14_12 C13_12 C16_12 118.7(3) . . ?
C12_12 C13_12 C16_12 121.2(3) . . ?
C11_12 C12_12 C13_12 120.0 . . ?
C11_12 C12_12 H12_12 120.0 . . ?
C13_12 C12_12 H12_12 120.0 . . ?
C12_12 C11_12 C10_12 120.0 . . ?
C12_12 C11_12 H11_12 120.0 . . ?
C10_12 C11_12 H11_12 120.0 . . ?
C11_12 C10_12 C15_12 120.0 . . ?
C11_12 C10_12 S2_12 120.76(12) . . ?
C15_12 C10_12 S2_12 119.14(12) . . ?
C1_13 P_13 C7_13 103.81(9) . . ?
C1_13 P_13 C13_13 104.82(9) . . ?
C7_13 P_13 C13_13 100.65(9) . . ?
C1_13 P_13 Pt_11 118.81(7) . . ?
C7_13 P_13 Pt_11 111.96(7) . . ?
C13_13 P_13 Pt_11 114.72(6) . . ?
C17_13 C18_13 C13_13 120.0 . . ?
C17_13 C18_13 H18_13 120.0 . . ?
C13_13 C18_13 H18_13 120.0 . . ?
C16_13 C17_13 C18_13 120.0 . . ?
C16_13 C17_13 H17_13 120.0 . . ?
C18_13 C17_13 H17_13 120.0 . . ?
C17_13 C16_13 C15_13 120.0 . . ?
C17_13 C16_13 H16_13 120.0 . . ?
C15_13 C16_13 H16_13 120.0 . . ?
C14_13 C15_13 C16_13 120.0 . . ?
C14_13 C15_13 H15_13 120.0 . . ?
C16_13 C15_13 H15_13 120.0 . . ?
C13_13 C14_13 C15_13 120.0 . . ?
C13_13 C14_13 H14_13 120.0 . . ?
C15_13 C14_13 H14_13 120.0 . . ?
C14_13 C13_13 C18_13 120.0 . . ?
C14_13 C13_13 P_13 118.85(10) . . ?
C18_13 C13_13 P_13 121.15(10) . . ?
C8_13 C7_13 C12_13 120.0 . . ?
C8_13 C7_13 P_13 122.60(10) . . ?
C12_13 C7_13 P_13 117.39(10) . . ?
C9_13 C8_13 C7_13 120.0 . . ?
C9_13 C8_13 H8_13 120.0 . . ?
C7_13 C8_13 H8_13 120.0 . . ?
C8_13 C9_13 C10_13 120.0 . . ?
C8_13 C9_13 H9_13 120.0 . . ?
C10_13 C9_13 H9_13 120.0 . . ?
C9_13 C10_13 C11_13 120.0 . . ?
C9_13 C10_13 H10_13 120.0 . . ?
C11_13 C10_13 H10_13 120.0 . . ?
C12_13 C11_13 C10_13 120.0 . . ?
C12_13 C11_13 H11_13 120.0 . . ?
C10_13 C11_13 H11_13 120.0 . . ?
C11_13 C12_13 C7_13 120.0 . . ?
C11_13 C12_13 H12_13 120.0 . . ?
C7_13 C12_13 H12_13 120.0 . . ?
C2_13 C1_13 C6_13 120.0 . . ?
C2_13 C1_13 P_13 117.35(12) . . ?
C6_13 C1_13 P_13 122.65(12) . . ?
C3_13 C2_13 C1_13 120.0 . . ?
C3_13 C2_13 H2_13 120.0 . . ?
C1_13 C2_13 H2_13 120.0 . . ?
C4_13 C3_13 C2_13 120.0 . . ?
C4_13 C3_13 H3_13 120.0 . . ?
C2_13 C3_13 H3_13 120.0 . . ?
C5_13 C4_13 C3_13 120.0 . . ?
C5_13 C4_13 H4_13 120.0 . . ?
C3_13 C4_13 H4_13 120.0 . . ?
C4_13 C5_13 C6_13 120.0 . . ?
C4_13 C5_13 H5_13 120.0 . . ?
C6_13 C5_13 H5_13 120.0 . . ?
C5_13 C6_13 C1_13 120.0 . . ?
C5_13 C6_13 H6_13 120.0 . . ?
C1_13 C6_13 H6_13 120.0 . . ?
C1_14 P_14 C7_14 104.17(10) . . ?
C1_14 P_14 C13_14 104.88(10) . . ?
C7_14 P_14 C13_14 102.95(10) . . ?
C1_14 P_14 Pt_11 118.98(7) . . ?
C7_14 P_14 Pt_11 108.84(7) . . ?
C13_14 P_14 Pt_11 115.35(8) . . ?
C17_14 C18_14 C13_14 120.0 . . ?
C17_14 C18_14 H18_14 120.0 . . ?
C13_14 C18_14 H18_14 120.0 . . ?
C18_14 C17_14 C16_14 120.0 . . ?
C18_14 C17_14 H17_14 120.0 . . ?
C16_14 C17_14 H17_14 120.0 . . ?
C15_14 C16_14 C17_14 120.0 . . ?
C15_14 C16_14 H16_14 120.0 . . ?
C17_14 C16_14 H16_14 120.0 . . ?
C14_14 C15_14 C16_14 120.0 . . ?
C14_14 C15_14 H15_14 120.0 . . ?
C16_14 C15_14 H15_14 120.0 . . ?
C15_14 C14_14 C13_14 120.0 . . ?
C15_14 C14_14 H14_14 120.0 . . ?
C13_14 C14_14 H14_14 120.0 . . ?
C14_14 C13_14 C18_14 120.0 . . ?
C14_14 C13_14 P_14 121.06(11) . . ?
C18_14 C13_14 P_14 118.81(11) . . ?
C8_14 C7_14 C12_14 120.0 . . ?
C8_14 C7_14 P_14 122.02(11) . . ?
C12_14 C7_14 P_14 117.86(12) . . ?
C7_14 C8_14 C9_14 120.0 . . ?
C7_14 C8_14 H8_14 120.0 . . ?
C9_14 C8_14 H8_14 120.0 . . ?
C10_14 C9_14 C8_14 120.0 . . ?
C10_14 C9_14 H9_14 120.0 . . ?
C8_14 C9_14 H9_14 120.0 . . ?
C9_14 C10_14 C11_14 120.0 . . ?
C9_14 C10_14 H10_14 120.0 . . ?
C11_14 C10_14 H10_14 120.0 . . ?
C12_14 C11_14 C10_14 120.0 . . ?
C12_14 C11_14 H11_14 120.0 . . ?
C10_14 C11_14 H11_14 120.0 . . ?
C11_14 C12_14 C7_14 120.0 . . ?
C11_14 C12_14 H12_14 120.0 . . ?
C7_14 C12_14 H12_14 120.0 . . ?
C2_14 C1_14 C6_14 120.0 . . ?
C2_14 C1_14 P_14 117.54(12) . . ?
C6_14 C1_14 P_14 122.44(11) . . ?
C1_14 C2_14 C3_14 120.0 . . ?
C1_14 C2_14 H2_14 120.0 . . ?
C3_14 C2_14 H2_14 120.0 . . ?
C4_14 C3_14 C2_14 120.0 . . ?
C4_14 C3_14 H3_14 120.0 . . ?
C2_14 C3_14 H3_14 120.0 . . ?
C5_14 C4_14 C3_14 120.0 . . ?
C5_14 C4_14 H4_14 120.0 . . ?
C3_14 C4_14 H4_14 120.0 . . ?
C4_14 C5_14 C6_14 120.0 . . ?
C4_14 C5_14 H5_14 120.0 . . ?
C6_14 C5_14 H5_14 120.0 . . ?
C5_14 C6_14 C1_14 120.0 . . ?
C5_14 C6_14 H6_14 120.0 . . ?
C1_14 C6_14 H6_14 120.0 . . ?
C2_22 Pt_21 C1_22 40.88(8) . . ?
C2_22 Pt_21 PB_24 149.2(2) . . ?
C1_22 Pt_21 PB_24 108.5(2) . . ?
C2_22 Pt_21 P_23 102.09(7) . . ?
C1_22 Pt_21 P_23 142.15(7) . . ?
PB_24 Pt_21 P_23 108.7(2) . . ?
C2_22 Pt_21 PA_24 151.1(2) . . ?
C1_22 Pt_21 PA_24 110.6(2) . . ?
P_23 Pt_21 PA_24 106.8(2) . . ?
C6_22 C9_22 H9A_22 109.5 . . ?
C6_22 C9_22 H9B_22 109.5 . . ?
H9A_22 C9_22 H9B_22 109.5 . . ?
C6_22 C9_22 H9C_22 109.5 . . ?
H9A_22 C9_22 H9C_22 109.5 . . ?
H9B_22 C9_22 H9C_22 109.5 . . ?
C7_22 C8_22 C3_22 120.0 . . ?
C7_22 C8_22 H8_22 120.0 . . ?
C3_22 C8_22 H8_22 120.0 . . ?
C6_22 C7_22 C8_22 120.0 . . ?
C6_22 C7_22 H7_22 120.0 . . ?
C8_22 C7_22 H7_22 120.0 . . ?
C7_22 C6_22 C5_22 120.0 . . ?
C7_22 C6_22 C9_22 120.1(3) . . ?
C5_22 C6_22 C9_22 119.9(3) . . ?
C4_22 C5_22 C6_22 120.0 . . ?
C4_22 C5_22 H5_22 120.0 . . ?
C6_22 C5_22 H5_22 120.0 . . ?
C5_22 C4_22 C3_22 120.0 . . ?
C5_22 C4_22 H4_22 120.0 . . ?
C3_22 C4_22 H4_22 120.0 . . ?
C4_22 C3_22 C8_22 120.0 . . ?
C4_22 C3_22 S1_22 120.16(11) . . ?
C8_22 C3_22 S1_22 119.83(11) . . ?
O1_22 S1_22 O2_22 119.37(16) . . ?
O1_22 S1_22 C1_22 108.16(13) . . ?
O2_22 S1_22 C1_22 109.26(12) . . ?
O1_22 S1_22 C3_22 107.22(12) . . ?
O2_22 S1_22 C3_22 106.29(12) . . ?
C1_22 S1_22 C3_22 105.72(10) . . ?
C2_22 C1_22 S1_22 115.61(17) . . ?
C2_22 C1_22 Pt_21 68.23(12) . . ?
S1_22 C1_22 Pt_21 115.53(12) . . ?
C2_22 C1_22 H1_22 116.3 . . ?
S1_22 C1_22 H1_22 116.3 . . ?
Pt_21 C1_22 H1_22 116.3 . . ?
C1_22 C2_22 S2_22 117.37(17) . . ?
C1_22 C2_22 Pt_21 70.89(13) . . ?
S2_22 C2_22 Pt_21 115.51(12) . . ?
C1_22 C2_22 H2_22 115.3 . . ?
S2_22 C2_22 H2_22 115.3 . . ?
Pt_21 C2_22 H2_22 115.3 . . ?
O3_22 S2_22 O4_22 117.88(17) . . ?
O3_22 S2_22 C10_22 109.02(14) . . ?
O4_22 S2_22 C10_22 107.04(13) . . ?
O3_22 S2_22 C2_22 109.33(13) . . ?
O4_22 S2_22 C2_22 108.86(13) . . ?
C10_22 S2_22 C2_22 103.77(11) . . ?
C13_22 C16_22 H16A_22 109.5 . . ?
C13_22 C16_22 H16B_22 109.5 . . ?
H16A_22 C16_22 H16B_22 109.5 . . ?
C13_22 C16_22 H16C_22 109.5 . . ?
H16A_22 C16_22 H16C_22 109.5 . . ?
H16B_22 C16_22 H16C_22 109.5 . . ?
C14_22 C15_22 C10_22 120.0 . . ?
C14_22 C15_22 H15_22 120.0 . . ?
C10_22 C15_22 H15_22 120.0 . . ?
C13_22 C14_22 C15_22 120.0 . . ?
C13_22 C14_22 H14_22 120.0 . . ?
C15_22 C14_22 H14_22 120.0 . . ?
C14_22 C13_22 C12_22 120.0 . . ?
C14_22 C13_22 C16_22 120.5(3) . . ?
C12_22 C13_22 C16_22 119.5(3) . . ?
C11_22 C12_22 C13_22 120.0 . . ?
C11_22 C12_22 H12_22 120.0 . . ?
C13_22 C12_22 H12_22 120.0 . . ?
C10_22 C11_22 C12_22 120.0 . . ?
C10_22 C11_22 H11_22 120.0 . . ?
C12_22 C11_22 H11_22 120.0 . . ?
C11_22 C10_22 C15_22 120.0 . . ?
C11_22 C10_22 S2_22 120.39(12) . . ?
C15_22 C10_22 S2_22 119.61(12) . . ?
C13_23 P_23 C1_23 102.18(9) . . ?
C13_23 P_23 C7_23 103.79(9) . . ?
C1_23 P_23 C7_23 104.16(9) . . ?
C13_23 P_23 Pt_21 116.96(7) . . ?
C1_23 P_23 Pt_21 119.94(7) . . ?
C7_23 P_23 Pt_21 108.03(6) . . ?
C17_23 C18_23 C13_23 120.0 . . ?
C17_23 C18_23 H18_23 120.0 . . ?
C13_23 C18_23 H18_23 120.0 . . ?
C16_23 C17_23 C18_23 120.0 . . ?
C16_23 C17_23 H17_23 120.0 . . ?
C18_23 C17_23 H17_23 120.0 . . ?
C17_23 C16_23 C15_23 120.0 . . ?
C17_23 C16_23 H16_23 120.0 . . ?
C15_23 C16_23 H16_23 120.0 . . ?
C16_23 C15_23 C14_23 120.0 . . ?
C16_23 C15_23 H15_23 120.0 . . ?
C14_23 C15_23 H15_23 120.0 . . ?
C13_23 C14_23 C15_23 120.0 . . ?
C13_23 C14_23 H14_23 120.0 . . ?
C15_23 C14_23 H14_23 120.0 . . ?
C14_23 C13_23 C18_23 120.0 . . ?
C14_23 C13_23 P_23 117.61(11) . . ?
C18_23 C13_23 P_23 122.39(11) . . ?
C8_23 C7_23 C12_23 120.0 . . ?
C8_23 C7_23 P_23 122.23(9) . . ?
C12_23 C7_23 P_23 117.57(9) . . ?
C9_23 C8_23 C7_23 120.0 . . ?
C9_23 C8_23 H8_23 120.0 . . ?
C7_23 C8_23 H8_23 120.0 . . ?
C8_23 C9_23 C10_23 120.0 . . ?
C8_23 C9_23 H9_23 120.0 . . ?
C10_23 C9_23 H9_23 120.0 . . ?
C11_23 C10_23 C9_23 120.0 . . ?
C11_23 C10_23 H10_23 120.0 . . ?
C9_23 C10_23 H10_23 120.0 . . ?
C12_23 C11_23 C10_23 120.0 . . ?
C12_23 C11_23 H11_23 120.0 . . ?
C10_23 C11_23 H11_23 120.0 . . ?
C11_23 C12_23 C7_23 120.0 . . ?
C11_23 C12_23 H12_23 120.0 . . ?
C7_23 C12_23 H12_23 120.0 . . ?
C2_23 C1_23 C6_23 120.0 . . ?
C2_23 C1_23 P_23 118.88(10) . . ?
C6_23 C1_23 P_23 121.11(10) . . ?
C1_23 C2_23 C3_23 120.0 . . ?
C1_23 C2_23 H2_23 120.0 . . ?
C3_23 C2_23 H2_23 120.0 . . ?
C4_23 C3_23 C2_23 120.0 . . ?
C4_23 C3_23 H3_23 120.0 . . ?
C2_23 C3_23 H3_23 120.0 . . ?
C3_23 C4_23 C5_23 120.0 . . ?
C3_23 C4_23 H4_23 120.0 . . ?
C5_23 C4_23 H4_23 120.0 . . ?
C6_23 C5_23 C4_23 120.0 . . ?
C6_23 C5_23 H5_23 120.0 . . ?
C4_23 C5_23 H5_23 120.0 . . ?
C5_23 C6_23 C1_23 120.0 . . ?
C5_23 C6_23 H6_23 120.0 . . ?
C1_23 C6_23 H6_23 120.0 . . ?
C13A_24 PA_24 C1A_24 101.3(5) . . ?
C13A_24 PA_24 C7A_24 101.0(5) . . ?
C1A_24 PA_24 C7A_24 117.7(6) . . ?
C13A_24 PA_24 Pt_21 115.6(5) . . ?
C1A_24 PA_24 Pt_21 107.2(4) . . ?
C7A_24 PA_24 Pt_21 113.6(5) . . ?
C17A_24 C18A_24 C13A_24 120.0 . . ?
C17A_24 C18A_24 H18A_24 120.0 . . ?
C13A_24 C18A_24 H18A_24 120.0 . . ?
C18A_24 C17A_24 C16A_24 120.0 . . ?
C18A_24 C17A_24 H17A_24 120.0 . . ?
C16A_24 C17A_24 H17A_24 120.0 . . ?
C15A_24 C16A_24 C17A_24 120.0 . . ?
C15A_24 C16A_24 H16A_24 120.0 . . ?
C17A_24 C16A_24 H16A_24 120.0 . . ?
C14A_24 C15A_24 C16A_24 120.0 . . ?
C14A_24 C15A_24 H15A_24 120.0 . . ?
C16A_24 C15A_24 H15A_24 120.0 . . ?
C15A_24 C14A_24 C13A_24 120.0 . . ?
C15A_24 C14A_24 H14A_24 120.0 . . ?
C13A_24 C14A_24 H14A_24 120.0 . . ?
C14A_24 C13A_24 C18A_24 120.0 . . ?
C14A_24 C13A_24 PA_24 116.8(4) . . ?
C18A_24 C13A_24 PA_24 123.2(4) . . ?
C8A_24 C7A_24 C12A_24 120.0 . . ?
C8A_24 C7A_24 PA_24 117.0(4) . . ?
C12A_24 C7A_24 PA_24 123.0(4) . . ?
C9A_24 C8A_24 C7A_24 120.0 . . ?
C9A_24 C8A_24 H8A_24 120.0 . . ?
C7A_24 C8A_24 H8A_24 120.0 . . ?
C8A_24 C9A_24 C10A_24 120.0 . . ?
C8A_24 C9A_24 H9A_24 120.0 . . ?
C10A_24 C9A_24 H9A_24 120.0 . . ?
C11A_24 C10A_24 C9A_24 120.0 . . ?
C11A_24 C10A_24 H10A_24 120.0 . . ?
C9A_24 C10A_24 H10A_24 120.0 . . ?
C10A_24 C11A_24 C12A_24 120.0 . . ?
C10A_24 C11A_24 H11A_24 120.0 . . ?
C12A_24 C11A_24 H11A_24 120.0 . . ?
C11A_24 C12A_24 C7A_24 120.0 . . ?
C11A_24 C12A_24 H12A_24 120.0 . . ?
C7A_24 C12A_24 H12A_24 120.0 . . ?
C2A_24 C1A_24 C6A_24 120.0 . . ?
C2A_24 C1A_24 PA_24 123.1(4) . . ?
C6A_24 C1A_24 PA_24 116.9(4) . . ?
C3A_24 C2A_24 C1A_24 120.0 . . ?
C3A_24 C2A_24 H2A_24 120.0 . . ?
C1A_24 C2A_24 H2A_24 120.0 . . ?
C2A_24 C3A_24 C4A_24 120.0 . . ?
C2A_24 C3A_24 H3A_24 120.0 . . ?
C4A_24 C3A_24 H3A_24 120.0 . . ?
C5A_24 C4A_24 C3A_24 120.0 . . ?
C5A_24 C4A_24 H4A_24 120.0 . . ?
C3A_24 C4A_24 H4A_24 120.0 . . ?
C4A_24 C5A_24 C6A_24 120.0 . . ?
C4A_24 C5A_24 H5A_24 120.0 . . ?
C6A_24 C5A_24 H5A_24 120.0 . . ?
C5A_24 C6A_24 C1A_24 120.0 . . ?
C5A_24 C6A_24 H6A_24 120.0 . . ?
C1A_24 C6A_24 H6A_24 120.0 . . ?
C7B_24 PB_24 C13B_24 100.5(4) . . ?
C7B_24 PB_24 C1B_24 92.3(5) . . ?
C13B_24 PB_24 C1B_24 104.1(5) . . ?
C7B_24 PB_24 Pt_21 111.4(4) . . ?
C13B_24 PB_24 Pt_21 117.8(5) . . ?
C1B_24 PB_24 Pt_21 125.4(5) . . ?
C17B_24 C18B_24 C13B_24 120.0 . . ?
C17B_24 C18B_24 H18B_24 120.0 . . ?
C13B_24 C18B_24 H18B_24 120.0 . . ?
C18B_24 C17B_24 C16B_24 120.0 . . ?
C18B_24 C17B_24 H17B_24 120.0 . . ?
C16B_24 C17B_24 H17B_24 120.0 . . ?
C17B_24 C16B_24 C15B_24 120.0 . . ?
C17B_24 C16B_24 H16B_24 120.0 . . ?
C15B_24 C16B_24 H16B_24 120.0 . . ?
C14B_24 C15B_24 C16B_24 120.0 . . ?
C14B_24 C15B_24 H15B_24 120.0 . . ?
C16B_24 C15B_24 H15B_24 120.0 . . ?
C15B_24 C14B_24 C13B_24 120.0 . . ?
C15B_24 C14B_24 H14B_24 120.0 . . ?
C13B_24 C14B_24 H14B_24 120.0 . . ?
C14B_24 C13B_24 C18B_24 120.0 . . ?
C14B_24 C13B_24 PB_24 119.0(4) . . ?
C18B_24 C13B_24 PB_24 121.0(4) . . ?
C8B_24 C7B_24 C12B_24 120.0 . . ?
C8B_24 C7B_24 PB_24 124.1(4) . . ?
C12B_24 C7B_24 PB_24 115.9(4) . . ?
C7B_24 C8B_24 C9B_24 120.0 . . ?
C7B_24 C8B_24 H8B_24 120.0 . . ?
C9B_24 C8B_24 H8B_24 120.0 . . ?
C10B_24 C9B_24 C8B_24 120.0 . . ?
C10B_24 C9B_24 H9B_24 120.0 . . ?
C8B_24 C9B_24 H9B_24 120.0 . . ?
C9B_24 C10B_24 C11B_24 120.0 . . ?
C9B_24 C10B_24 H10B_24 120.0 . . ?
C11B_24 C10B_24 H10B_24 120.0 . . ?
C12B_24 C11B_24 C10B_24 120.0 . . ?
C12B_24 C11B_24 H11B_24 120.0 . . ?
C10B_24 C11B_24 H11B_24 120.0 . . ?
C11B_24 C12B_24 C7B_24 120.0 . . ?
C11B_24 C12B_24 H12B_24 120.0 . . ?
C7B_24 C12B_24 H12B_24 120.0 . . ?
C2B_24 C1B_24 C6B_24 120.0 . . ?
C2B_24 C1B_24 PB_24 125.9(4) . . ?
C6B_24 C1B_24 PB_24 114.1(4) . . ?
C1B_24 C2B_24 C3B_24 120.0 . . ?
C1B_24 C2B_24 H2B_24 120.0 . . ?
C3B_24 C2B_24 H2B_24 120.0 . . ?
C2B_24 C3B_24 C4B_24 120.0 . . ?
C2B_24 C3B_24 H3B_24 120.0 . . ?
C4B_24 C3B_24 H3B_24 120.0 . . ?
C3B_24 C4B_24 C5B_24 120.0 . . ?
C3B_24 C4B_24 H4B_24 120.0 . . ?
C5B_24 C4B_24 H4B_24 120.0 . . ?
C6B_24 C5B_24 C4B_24 120.0 . . ?
C6B_24 C5B_24 H5B_24 120.0 . . ?
C4B_24 C5B_24 H5B_24 120.0 . . ?
C5B_24 C6B_24 C1B_24 120.0 . . ?
C5B_24 C6B_24 H6B_24 120.0 . . ?
C1B_24 C6B_24 H6B_24 120.0 . . ?
 
loop_
 _geom_torsion_atom_site_label_1
 _geom_torsion_atom_site_label_2
 _geom_torsion_atom_site_label_3
 _geom_torsion_atom_site_label_4
 _geom_torsion
 _geom_torsion_site_symmetry_1
 _geom_torsion_site_symmetry_2
 _geom_torsion_site_symmetry_3
 _geom_torsion_site_symmetry_4
 _geom_torsion_publ_flag
C3_91 O1_91 C2_91 C1_91 -111(2) . . . . ?
C2_91 O1_91 C3_91 C4_91 172.8(15) . . . . ?
C3_12 C8_12 C7_12 C6_12 0.0 . . . . ?
C8_12 C7_12 C6_12 C5_12 0.0 . . . . ?
C8_12 C7_12 C6_12 C9_12 178.2(4) . . . . ?
C7_12 C6_12 C5_12 C4_12 0.0 . . . . ?
C9_12 C6_12 C5_12 C4_12 -178.2(4) . . . . ?
C6_12 C5_12 C4_12 C3_12 0.0 . . . . ?
C5_12 C4_12 C3_12 C8_12 0.0 . . . . ?
C5_12 C4_12 C3_12 S1_12 -179.66(19) . . . . ?
C7_12 C8_12 C3_12 C4_12 0.0 . . . . ?
C7_12 C8_12 C3_12 S1_12 179.66(19) . . . . ?
C4_12 C3_12 S1_12 O2_12 126.00(19) . . . . ?
C8_12 C3_12 S1_12 O2_12 -53.7(2) . . . . ?
C4_12 C3_12 S1_12 O1_12 -2.2(2) . . . . ?
C8_12 C3_12 S1_12 O1_12 178.1(2) . . . . ?
C4_12 C3_12 S1_12 C1_12 -118.26(17) . . . . ?
C8_12 C3_12 S1_12 C1_12 62.09(19) . . . . ?
O2_12 S1_12 C1_12 C2_12 29.4(2) . . . . ?
O1_12 S1_12 C1_12 C2_12 159.4(2) . . . . ?
C3_12 S1_12 C1_12 C2_12 -85.53(19) . . . . ?
O2_12 S1_12 C1_12 Pt_11 -47.77(19) . . . . ?
O1_12 S1_12 C1_12 Pt_11 82.25(19) . . . . ?
C3_12 S1_12 C1_12 Pt_11 -162.72(12) . . . . ?
S1_12 C1_12 C2_12 S2_12 147.08(14) . . . . ?
Pt_11 C1_12 C2_12 S2_12 -106.79(15) . . . . ?
S1_12 C1_12 C2_12 Pt_11 -106.13(16) . . . . ?
C1_12 C2_12 S2_12 O4_12 156.95(19) . . . . ?
Pt_11 C2_12 S2_12 O4_12 77.88(18) . . . . ?
C1_12 C2_12 S2_12 O3_12 25.6(2) . . . . ?
Pt_11 C2_12 S2_12 O3_12 -53.48(18) . . . . ?
C1_12 C2_12 S2_12 C10_12 -88.66(18) . . . . ?
Pt_11 C2_12 S2_12 C10_12 -167.74(11) . . . . ?
C10_12 C15_12 C14_12 C13_12 0.0 . . . . ?
C15_12 C14_12 C13_12 C12_12 0.0 . . . . ?
C15_12 C14_12 C13_12 C16_12 -176.5(3) . . . . ?
C14_12 C13_12 C12_12 C11_12 0.0 . . . . ?
C16_12 C13_12 C12_12 C11_12 176.4(3) . . . . ?
C13_12 C12_12 C11_12 C10_12 0.0 . . . . ?
C12_12 C11_12 C10_12 C15_12 0.0 . . . . ?
C12_12 C11_12 C10_12 S2_12 -176.44(17) . . . . ?
C14_12 C15_12 C10_12 C11_12 0.0 . . . . ?
C14_12 C15_12 C10_12 S2_12 176.50(17) . . . . ?
O4_12 S2_12 C10_12 C11_12 -154.25(17) . . . . ?
O3_12 S2_12 C10_12 C11_12 -24.5(2) . . . . ?
C2_12 S2_12 C10_12 C11_12 90.54(17) . . . . ?
O4_12 S2_12 C10_12 C15_12 29.28(19) . . . . ?
O3_12 S2_12 C10_12 C15_12 159.00(18) . . . . ?
C2_12 S2_12 C10_12 C15_12 -85.93(17) . . . . ?
C13_13 C18_13 C17_13 C16_13 0.0 . . . . ?
C18_13 C17_13 C16_13 C15_13 0.0 . . . . ?
C17_13 C16_13 C15_13 C14_13 0.0 . . . . ?
C16_13 C15_13 C14_13 C13_13 0.0 . . . . ?
C15_13 C14_13 C13_13 C18_13 0.0 . . . . ?
C15_13 C14_13 C13_13 P_13 -179.90(14) . . . . ?
C17_13 C18_13 C13_13 C14_13 0.0 . . . . ?
C17_13 C18_13 C13_13 P_13 179.90(15) . . . . ?
C1_13 P_13 C13_13 C14_13 103.37(13) . . . . ?
C7_13 P_13 C13_13 C14_13 -149.11(12) . . . . ?
Pt_11 P_13 C13_13 C14_13 -28.74(13) . . . . ?
C1_13 P_13 C13_13 C18_13 -76.53(14) . . . . ?
C7_13 P_13 C13_13 C18_13 30.99(13) . . . . ?
Pt_11 P_13 C13_13 C18_13 151.36(10) . . . . ?
C1_13 P_13 C7_13 C8_13 -2.05(14) . . . . ?
C13_13 P_13 C7_13 C8_13 -110.36(13) . . . . ?
Pt_11 P_13 C7_13 C8_13 127.31(11) . . . . ?
C1_13 P_13 C7_13 C12_13 177.07(11) . . . . ?
C13_13 P_13 C7_13 C12_13 68.75(13) . . . . ?
Pt_11 P_13 C7_13 C12_13 -53.57(12) . . . . ?
C12_13 C7_13 C8_13 C9_13 0.0 . . . . ?
P_13 C7_13 C8_13 C9_13 179.10(15) . . . . ?
C7_13 C8_13 C9_13 C10_13 0.0 . . . . ?
C8_13 C9_13 C10_13 C11_13 0.0 . . . . ?
C9_13 C10_13 C11_13 C12_13 0.0 . . . . ?
C10_13 C11_13 C12_13 C7_13 0.0 . . . . ?
C8_13 C7_13 C12_13 C11_13 0.0 . . . . ?
P_13 C7_13 C12_13 C11_13 -179.14(15) . . . . ?
C7_13 P_13 C1_13 C2_13 84.54(14) . . . . ?
C13_13 P_13 C1_13 C2_13 -170.27(13) . . . . ?
Pt_11 P_13 C1_13 C2_13 -40.54(15) . . . . ?
C7_13 P_13 C1_13 C6_13 -95.32(15) . . . . ?
C13_13 P_13 C1_13 C6_13 9.86(16) . . . . ?
Pt_11 P_13 C1_13 C6_13 139.59(13) . . . . ?
C6_13 C1_13 C2_13 C3_13 0.0 . . . . ?
P_13 C1_13 C2_13 C3_13 -179.87(16) . . . . ?
C1_13 C2_13 C3_13 C4_13 0.0 . . . . ?
C2_13 C3_13 C4_13 C5_13 0.0 . . . . ?
C3_13 C4_13 C5_13 C6_13 0.0 . . . . ?
C4_13 C5_13 C6_13 C1_13 0.0 . . . . ?
C2_13 C1_13 C6_13 C5_13 0.0 . . . . ?
P_13 C1_13 C6_13 C5_13 179.86(17) . . . . ?
C13_14 C18_14 C17_14 C16_14 0.0 . . . . ?
C18_14 C17_14 C16_14 C15_14 0.0 . . . . ?
C17_14 C16_14 C15_14 C14_14 0.0 . . . . ?
C16_14 C15_14 C14_14 C13_14 0.0 . . . . ?
C15_14 C14_14 C13_14 C18_14 0.0 . . . . ?
C15_14 C14_14 C13_14 P_14 -175.70(17) . . . . ?
C17_14 C18_14 C13_14 C14_14 0.0 . . . . ?
C17_14 C18_14 C13_14 P_14 175.79(17) . . . . ?
C1_14 P_14 C13_14 C14_14 -131.74(17) . . . . ?
C7_14 P_14 C13_14 C14_14 -23.01(18) . . . . ?
Pt_11 P_14 C13_14 C14_14 95.38(17) . . . . ?
C1_14 P_14 C13_14 C18_14 52.52(17) . . . . ?
C7_14 P_14 C13_14 C18_14 161.24(15) . . . . ?
Pt_11 P_14 C13_14 C18_14 -80.37(16) . . . . ?
C1_14 P_14 C7_14 C8_14 11.43(16) . . . . ?
C13_14 P_14 C7_14 C8_14 -97.83(16) . . . . ?
Pt_11 P_14 C7_14 C8_14 139.31(13) . . . . ?
C1_14 P_14 C7_14 C12_14 -172.59(13) . . . . ?
C13_14 P_14 C7_14 C12_14 78.15(15) . . . . ?
Pt_11 P_14 C7_14 C12_14 -44.71(14) . . . . ?
C12_14 C7_14 C8_14 C9_14 0.0 . . . . ?
P_14 C7_14 C8_14 C9_14 175.89(17) . . . . ?
C7_14 C8_14 C9_14 C10_14 0.0 . . . . ?
C8_14 C9_14 C10_14 C11_14 0.0 . . . . ?
C9_14 C10_14 C11_14 C12_14 0.0 . . . . ?
C10_14 C11_14 C12_14 C7_14 0.0 . . . . ?
C8_14 C7_14 C12_14 C11_14 0.0 . . . . ?
P_14 C7_14 C12_14 C11_14 -176.06(16) . . . . ?
C7_14 P_14 C1_14 C2_14 97.87(14) . . . . ?
C13_14 P_14 C1_14 C2_14 -154.29(13) . . . . ?
Pt_11 P_14 C1_14 C2_14 -23.49(15) . . . . ?
C7_14 P_14 C1_14 C6_14 -80.49(15) . . . . ?
C13_14 P_14 C1_14 C6_14 27.34(15) . . . . ?
Pt_11 P_14 C1_14 C6_14 158.14(11) . . . . ?
C6_14 C1_14 C2_14 C3_14 0.0 . . . . ?
P_14 C1_14 C2_14 C3_14 -178.41(16) . . . . ?
C1_14 C2_14 C3_14 C4_14 0.0 . . . . ?
C2_14 C3_14 C4_14 C5_14 0.0 . . . . ?
C3_14 C4_14 C5_14 C6_14 0.0 . . . . ?
C4_14 C5_14 C6_14 C1_14 0.0 . . . . ?
C2_14 C1_14 C6_14 C5_14 0.0 . . . . ?
P_14 C1_14 C6_14 C5_14 178.33(17) . . . . ?
C3_22 C8_22 C7_22 C6_22 0.0 . . . . ?
C8_22 C7_22 C6_22 C5_22 0.0 . . . . ?
C8_22 C7_22 C6_22 C9_22 -178.2(3) . . . . ?
C7_22 C6_22 C5_22 C4_22 0.0 . . . . ?
C9_22 C6_22 C5_22 C4_22 178.2(3) . . . . ?
C6_22 C5_22 C4_22 C3_22 0.0 . . . . ?
C5_22 C4_22 C3_22 C8_22 0.0 . . . . ?
C5_22 C4_22 C3_22 S1_22 -178.73(15) . . . . ?
C7_22 C8_22 C3_22 C4_22 0.0 . . . . ?
C7_22 C8_22 C3_22 S1_22 178.73(15) . . . . ?
C4_22 C3_22 S1_22 O1_22 46.35(18) . . . . ?
C8_22 C3_22 S1_22 O1_22 -132.38(16) . . . . ?
C4_22 C3_22 S1_22 O2_22 175.06(15) . . . . ?
C8_22 C3_22 S1_22 O2_22 -3.66(17) . . . . ?
C4_22 C3_22 S1_22 C1_22 -68.88(15) . . . . ?
C8_22 C3_22 S1_22 C1_22 112.39(14) . . . . ?
O1_22 S1_22 C1_22 C2_22 179.10(18) . . . . ?
O2_22 S1_22 C1_22 C2_22 47.7(2) . . . . ?
C3_22 S1_22 C1_22 C2_22 -66.32(19) . . . . ?
O1_22 S1_22 C1_22 Pt_21 102.21(15) . . . . ?
O2_22 S1_22 C1_22 Pt_21 -29.19(17) . . . . ?
C3_22 S1_22 C1_22 Pt_21 -143.21(11) . . . . ?
S1_22 C1_22 C2_22 S2_22 141.64(14) . . . . ?
Pt_21 C1_22 C2_22 S2_22 -109.51(15) . . . . ?
S1_22 C1_22 C2_22 Pt_21 -108.85(15) . . . . ?
C1_22 C2_22 S2_22 O3_22 19.6(2) . . . . ?
Pt_21 C2_22 S2_22 O3_22 -61.07(17) . . . . ?
C1_22 C2_22 S2_22 O4_22 149.70(19) . . . . ?
Pt_21 C2_22 S2_22 O4_22 68.99(17) . . . . ?
C1_22 C2_22 S2_22 C10_22 -96.56(18) . . . . ?
Pt_21 C2_22 S2_22 C10_22 -177.27(11) . . . . ?
C10_22 C15_22 C14_22 C13_22 0.0 . . . . ?
C15_22 C14_22 C13_22 C12_22 0.0 . . . . ?
C15_22 C14_22 C13_22 C16_22 179.8(3) . . . . ?
C14_22 C13_22 C12_22 C11_22 0.0 . . . . ?
C16_22 C13_22 C12_22 C11_22 -179.8(3) . . . . ?
C13_22 C12_22 C11_22 C10_22 0.0 . . . . ?
C12_22 C11_22 C10_22 C15_22 0.0 . . . . ?
C12_22 C11_22 C10_22 S2_22 -179.75(15) . . . . ?
C14_22 C15_22 C10_22 C11_22 0.0 . . . . ?
C14_22 C15_22 C10_22 S2_22 179.75(15) . . . . ?
O3_22 S2_22 C10_22 C11_22 -20.98(18) . . . . ?
O4_22 S2_22 C10_22 C11_22 -149.52(17) . . . . ?
C2_22 S2_22 C10_22 C11_22 95.44(15) . . . . ?
O3_22 S2_22 C10_22 C15_22 159.27(15) . . . . ?
O4_22 S2_22 C10_22 C15_22 30.73(18) . . . . ?
C2_22 S2_22 C10_22 C15_22 -84.31(15) . . . . ?
C13_23 C18_23 C17_23 C16_23 0.0 . . . . ?
C18_23 C17_23 C16_23 C15_23 0.0 . . . . ?
C17_23 C16_23 C15_23 C14_23 0.0 . . . . ?
C16_23 C15_23 C14_23 C13_23 0.0 . . . . ?
C15_23 C14_23 C13_23 C18_23 0.0 . . . . ?
C15_23 C14_23 C13_23 P_23 179.25(15) . . . . ?
C17_23 C18_23 C13_23 C14_23 0.0 . . . . ?
C17_23 C18_23 C13_23 P_23 -179.22(15) . . . . ?
C1_23 P_23 C13_23 C14_23 57.36(14) . . . . ?
C7_23 P_23 C13_23 C14_23 165.45(12) . . . . ?
Pt_21 P_23 C13_23 C14_23 -75.70(13) . . . . ?
C1_23 P_23 C13_23 C18_23 -123.41(14) . . . . ?
C7_23 P_23 C13_23 C18_23 -15.31(15) . . . . ?
Pt_21 P_23 C13_23 C18_23 103.54(13) . . . . ?
C13_23 P_23 C7_23 C8_23 -108.63(13) . . . . ?
C1_23 P_23 C7_23 C8_23 -2.01(13) . . . . ?
Pt_21 P_23 C7_23 C8_23 126.56(10) . . . . ?
C13_23 P_23 C7_23 C12_23 76.56(12) . . . . ?
C1_23 P_23 C7_23 C12_23 -176.83(11) . . . . ?
Pt_21 P_23 C7_23 C12_23 -48.26(11) . . . . ?
C12_23 C7_23 C8_23 C9_23 0.0 . . . . ?
P_23 C7_23 C8_23 C9_23 -174.69(15) . . . . ?
C7_23 C8_23 C9_23 C10_23 0.0 . . . . ?
C8_23 C9_23 C10_23 C11_23 0.0 . . . . ?
C9_23 C10_23 C11_23 C12_23 0.0 . . . . ?
C10_23 C11_23 C12_23 C7_23 0.0 . . . . ?
C8_23 C7_23 C12_23 C11_23 0.0 . . . . ?
P_23 C7_23 C12_23 C11_23 174.94(14) . . . . ?
C13_23 P_23 C1_23 C2_23 -154.66(13) . . . . ?
C7_23 P_23 C1_23 C2_23 97.53(13) . . . . ?
Pt_21 P_23 C1_23 C2_23 -23.38(14) . . . . ?
C13_23 P_23 C1_23 C6_23 24.10(14) . . . . ?
C7_23 P_23 C1_23 C6_23 -83.71(14) . . . . ?
Pt_21 P_23 C1_23 C6_23 155.38(11) . . . . ?
C6_23 C1_23 C2_23 C3_23 0.0 . . . . ?
P_23 C1_23 C2_23 C3_23 178.77(15) . . . . ?
C1_23 C2_23 C3_23 C4_23 0.0 . . . . ?
C2_23 C3_23 C4_23 C5_23 0.0 . . . . ?
C3_23 C4_23 C5_23 C6_23 0.0 . . . . ?
C4_23 C5_23 C6_23 C1_23 0.0 . . . . ?
C2_23 C1_23 C6_23 C5_23 0.0 . . . . ?
P_23 C1_23 C6_23 C5_23 -178.75(16) . . . . ?
C13A_24 C18A_24 C17A_24 C16A_24 0.0 . . . . ?
C18A_24 C17A_24 C16A_24 C15A_24 0.0 . . . . ?
C17A_24 C16A_24 C15A_24 C14A_24 0.0 . . . . ?
C16A_24 C15A_24 C14A_24 C13A_24 0.0 . . . . ?
C15A_24 C14A_24 C13A_24 C18A_24 0.0 . . . . ?
C15A_24 C14A_24 C13A_24 PA_24 -179.9(4) . . . . ?
C17A_24 C18A_24 C13A_24 C14A_24 0.0 . . . . ?
C17A_24 C18A_24 C13A_24 PA_24 179.8(5) . . . . ?
C1A_24 PA_24 C13A_24 C14A_24 162.1(3) . . . . ?
C7A_24 PA_24 C13A_24 C14A_24 -76.4(5) . . . . ?
Pt_21 PA_24 C13A_24 C14A_24 46.6(5) . . . . ?
C1A_24 PA_24 C13A_24 C18A_24 -17.7(6) . . . . ?
C7A_24 PA_24 C13A_24 C18A_24 103.7(5) . . . . ?
Pt_21 PA_24 C13A_24 C18A_24 -133.2(4) . . . . ?
C13A_24 PA_24 C7A_24 C8A_24 -177.9(4) . . . . ?
C1A_24 PA_24 C7A_24 C8A_24 -68.7(7) . . . . ?
Pt_21 PA_24 C7A_24 C8A_24 57.7(6) . . . . ?
C13A_24 PA_24 C7A_24 C12A_24 1.3(7) . . . . ?
C1A_24 PA_24 C7A_24 C12A_24 110.5(6) . . . . ?
Pt_21 PA_24 C7A_24 C12A_24 -123.1(4) . . . . ?
C12A_24 C7A_24 C8A_24 C9A_24 0.0 . . . . ?
PA_24 C7A_24 C8A_24 C9A_24 179.3(5) . . . . ?
C7A_24 C8A_24 C9A_24 C10A_24 0.0 . . . . ?
C8A_24 C9A_24 C10A_24 C11A_24 0.0 . . . . ?
C9A_24 C10A_24 C11A_24 C12A_24 0.0 . . . . ?
C10A_24 C11A_24 C12A_24 C7A_24 0.0 . . . . ?
C8A_24 C7A_24 C12A_24 C11A_24 0.0 . . . . ?
PA_24 C7A_24 C12A_24 C11A_24 -179.2(5) . . . . ?
C13A_24 PA_24 C1A_24 C2A_24 -173.1(3) . . . . ?
C7A_24 PA_24 C1A_24 C2A_24 77.9(7) . . . . ?
Pt_21 PA_24 C1A_24 C2A_24 -51.6(5) . . . . ?
C13A_24 PA_24 C1A_24 C6A_24 8.7(6) . . . . ?
C7A_24 PA_24 C1A_24 C6A_24 -100.3(6) . . . . ?
Pt_21 PA_24 C1A_24 C6A_24 130.3(3) . . . . ?
C6A_24 C1A_24 C2A_24 C3A_24 0.0 . . . . ?
PA_24 C1A_24 C2A_24 C3A_24 -178.1(5) . . . . ?
C1A_24 C2A_24 C3A_24 C4A_24 0.0 . . . . ?
C2A_24 C3A_24 C4A_24 C5A_24 0.0 . . . . ?
C3A_24 C4A_24 C5A_24 C6A_24 0.0 . . . . ?
C4A_24 C5A_24 C6A_24 C1A_24 0.0 . . . . ?
C2A_24 C1A_24 C6A_24 C5A_24 0.0 . . . . ?
PA_24 C1A_24 C6A_24 C5A_24 178.2(4) . . . . ?
C13B_24 C18B_24 C17B_24 C16B_24 0.0 . . . . ?
C18B_24 C17B_24 C16B_24 C15B_24 0.0 . . . . ?
C17B_24 C16B_24 C15B_24 C14B_24 0.0 . . . . ?
C16B_24 C15B_24 C14B_24 C13B_24 0.0 . . . . ?
C15B_24 C14B_24 C13B_24 C18B_24 0.0 . . . . ?
C15B_24 C14B_24 C13B_24 PB_24 -179.4(5) . . . . ?
C17B_24 C18B_24 C13B_24 C14B_24 0.0 . . . . ?
C17B_24 C18B_24 C13B_24 PB_24 179.4(5) . . . . ?
C7B_24 PB_24 C13B_24 C14B_24 -132.8(4) . . . . ?
C1B_24 PB_24 C13B_24 C14B_24 132.1(4) . . . . ?
Pt_21 PB_24 C13B_24 C14B_24 -11.7(6) . . . . ?
C7B_24 PB_24 C13B_24 C18B_24 47.8(6) . . . . ?
C1B_24 PB_24 C13B_24 C18B_24 -47.3(5) . . . . ?
Pt_21 PB_24 C13B_24 C18B_24 168.9(3) . . . . ?
C13B_24 PB_24 C7B_24 C8B_24 -104.1(5) . . . . ?
C1B_24 PB_24 C7B_24 C8B_24 0.7(6) . . . . ?
Pt_21 PB_24 C7B_24 C8B_24 130.4(4) . . . . ?
C13B_24 PB_24 C7B_24 C12B_24 72.9(5) . . . . ?
C1B_24 PB_24 C7B_24 C12B_24 177.7(3) . . . . ?
Pt_21 PB_24 C7B_24 C12B_24 -52.6(5) . . . . ?
C12B_24 C7B_24 C8B_24 C9B_24 0.0 . . . . ?
PB_24 C7B_24 C8B_24 C9B_24 176.9(5) . . . . ?
C7B_24 C8B_24 C9B_24 C10B_24 0.0 . . . . ?
C8B_24 C9B_24 C10B_24 C11B_24 0.0 . . . . ?
C9B_24 C10B_24 C11B_24 C12B_24 0.0 . . . . ?
C10B_24 C11B_24 C12B_24 C7B_24 0.0 . . . . ?
C8B_24 C7B_24 C12B_24 C11B_24 0.0 . . . . ?
PB_24 C7B_24 C12B_24 C11B_24 -177.1(4) . . . . ?
C7B_24 PB_24 C1B_24 C2B_24 -39.7(6) . . . . ?
C13B_24 PB_24 C1B_24 C2B_24 61.7(6) . . . . ?
Pt_21 PB_24 C1B_24 C2B_24 -158.1(4) . . . . ?
C7B_24 PB_24 C1B_24 C6B_24 143.2(4) . . . . ?
C13B_24 PB_24 C1B_24 C6B_24 -115.4(4) . . . . ?
Pt_21 PB_24 C1B_24 C6B_24 24.8(7) . . . . ?
C6B_24 C1B_24 C2B_24 C3B_24 0.0 . . . . ?
PB_24 C1B_24 C2B_24 C3B_24 -176.9(6) . . . . ?
C1B_24 C2B_24 C3B_24 C4B_24 0.0 . . . . ?
C2B_24 C3B_24 C4B_24 C5B_24 0.0 . . . . ?
C3B_24 C4B_24 C5B_24 C6B_24 0.0 . . . . ?
C4B_24 C5B_24 C6B_24 C1B_24 0.0 . . . . ?
C2B_24 C1B_24 C6B_24 C5B_24 0.0 . . . . ?
PB_24 C1B_24 C6B_24 C5B_24 177.3(5) . . . . ?
 
_refine_diff_density_max    1.069
_refine_diff_density_min   -2.534
_refine_diff_density_rms    0.095

_shelx_res_file
;
TITL X4ESxT-23May085352_a.res in P-1
    XDS_ASCII_scaled1_unmerged.res
    created by SHELXL-2018/3 at 15:19:21 on 27-Aug-2023

REM Old TITL X4ESxT-23May085352 in P-1
REM SHELXT solution in P-1: R1 0.144, Rweak 0.008, Alpha 0.054
REM <I/s>   0.000 for    0 systematic absences,  Orientation as input
REM Formula found by SHELXT:  C88 N18 O9 S8 I2

CELL 0.62000  14.75400  18.27000  18.70500 101.7175  95.8765  98.8835
ZERR    4.00   0.00295   0.00365   0.00374   0.0300   0.0300   0.0300
LATT  1
SFAC  C   H O  S  Pt  P Cl
DISP    Pt   -0.84788    6.75574     24349.60
DISP    H     0.00000    0.00000         0.66
DISP    C     0.00201    0.00119         8.75
DISP    O     0.00771    0.00451        22.87
DISP    S     0.09937    0.09447       352.74
DISP    P     0.08091    0.07202       271.84
DISP    Cl    0.11982    0.12156       450.13
UNIT 213 195 17 8 4 8 2
L.S. 8
LIST 4
BOND $H
CONF
MERG 2
FMAP 2
rem SHEL 180 0.7
ACTA
WPDB -2
TEMP 25

SIZE 0.1 0.05 0.02
REM HFIX_MCH 23 C1
REM HFIX_TOE 43 C11 C12 C14 C15 C4 C8 C5 C7
REM HFIX_TOE 13 C1 C2
REM HFIX_TOE 137 C9 C16
rem HFIX_HPX  43 C3 C2 C5 C6 C8 C9 c4 c10 c16
rem HFIX_HPX  43 C11 C12 C14 C15 C17 C18
rem HFIX_14 43 C14a C15a C17a C18a C16a C16b C14b C15b C17b C18b
rem hfix_etz 137 c1a c4a c1b c4b
rem hfix_etz 23 c2a c3a c2b c3b
rem HFIX_24  43 C3a C2a C5a C6a C8a C9a c4a c10a c16a
rem HFIX_24  43 C11a C12a C14a C15a C17a C18a
rem HFIX_24  43 C3b C2b C5b C6b C8b C9b c4b c10b c16b
rem HFIX_24  43 C11b C12b C14b C15b C17b C18b

PLAN 20
sump 1 0.01 1.0 4 1.0 5 1.0 6

REM Omit extracted on Sun Aug 27 14:52:44 2023
omit 0 6 5
omit 3 5 6
omit -1 4 4
omit -1 6 4
omit -2 1 5
omit -5 4 9
omit 2 -8 2
omit -4 3 8

REM Omit extracted on Sun Aug 27 14:52:59 2023
omit -1 -1 1
omit 4 6 3
omit 0 7 2
omit 4 1 1
omit -3 -5 3
omit -1 -3 9
omit 7 -8 3
omit 5 -5 3
omit 1 0 1
omit 1 1 1
omit 4 0 1

REM Omit extracted on Sun Aug 27 15:07:26 2023
omit 8 7 2
omit -7 -5 3
omit -7 1 4
omit 0 -2 2
omit 3 -9 2
omit -3 2 9
omit 3 3 7
omit 0 2 0

REM Omit extracted on Sun Aug 27 15:05:00 2023
omit -1 8 4
omit 1 -6 7
omit 1 -3 7
omit 0 4 3

REM Omit extracted on Sun Aug 27 15:02:31 2023
omit 3 6 3
omit -4 -7 5
omit -6 -2 1
omit 5 1 3

WGHT    0.000000    2.769400
FVAR       0.07528   0.49516   1.00000   0.52976   0.22628   0.23281
RESI   91   ETZ
simu 0.01 c1a_92 > cl2b_92
dfix_91 1.42 0.01 o1 c2 o1 c3
dfix_91 1.47 0.01 c1 c2 c3 c4
dang_91 2.37 0.01 c1 o1 o1 c4
dang_91 2.40 0.01 c2 c3
sadi_91 0.01 o1 c2 o1 c3
sadi_91 0.01 c1 c2 c3 c4
PART    1
O1    3    0.271196    0.422995    0.097386    41.00000    0.14359    0.12562 =
         0.52254    0.02791   -0.04628    0.03004
C1    1    0.410329    0.467269    0.054321    41.00000    0.10386    0.14524 =
         0.09362    0.02983   -0.02131   -0.04742
AFIX  33
H1A   2    0.476048    0.482946    0.068073    41.00000   -1.50000
H1B   2    0.397943    0.424244    0.013317    41.00000   -1.50000
H1C   2    0.384324    0.508304    0.040626    41.00000   -1.50000
AFIX   0
C2    1    0.368331    0.446237    0.117244    41.00000    0.32753    0.13788 =
         0.44930    0.16854    0.23870    0.09957
AFIX  23
H2A   2    0.394965    0.405164    0.131596    41.00000   -1.20000
H2B   2    0.381314    0.489421    0.158969    41.00000   -1.20000
AFIX   0
C3    1    0.216963    0.473788    0.132858    41.00000    0.28690    0.12041 =
         0.13280    0.07255    0.02561    0.05433
AFIX  23
H3A   2    0.237961    0.524755    0.126478    41.00000   -1.20000
H3B   2    0.223126    0.474996    0.185233    41.00000   -1.20000
AFIX   0
C4    1    0.119590    0.446907    0.099542    41.00000    0.25391    0.19023 =
         0.19372    0.13538    0.13137    0.11301
AFIX  33
H4A   2    0.081851    0.480474    0.122765    41.00000   -1.50000
H4B   2    0.114105    0.446148    0.047800    41.00000   -1.50000
H4A3  2    0.099325    0.396572    0.106339    41.00000   -1.50000
AFIX   0

RESI   92 MCH
PART  -2
dfix_MCH 1.75 0.01 c1a cl1a c1a cl2a
dang_MCH 2.87 0.01 cl1a cl2a
C1A   1    0.358620    0.466873    0.145975    51.00000    0.33947    0.16619 =
         0.24623    0.10364    0.02746    0.01487
AFIX  23
H1A   2    0.382707    0.421920    0.152834    51.00000   -1.20000
H1B   2    0.388007    0.508802    0.186367    51.00000   -1.20000
AFIX   0
CL1A  7    0.384783    0.487741    0.062627    51.00000    0.35890    0.18459 =
         0.26030    0.11236   -0.01296    0.02399
CL2A  7    0.239133    0.451292    0.146814    51.00000    0.32181    0.15342 =
         0.22581    0.10852    0.06573   -0.01263
PART  -3
same_92 0.01 c1a > cl2a
C1B   1    0.256773    0.489303    0.088566    61.00000    0.33489    0.16014 =
         0.24477    0.10343    0.03057    0.01889
AFIX  23
H1C   2    0.254159    0.528979    0.061338    61.00000   -1.20000
H1D   2    0.248295    0.509762    0.139007    61.00000   -1.20000
AFIX   0
CL1B  7    0.364431    0.461850    0.087527    61.00000    0.35922    0.18340 =
         0.26588    0.09882    0.02086    0.02330
CL2B  7    0.168171    0.412546    0.049365    61.00000    0.30829    0.12962 =
         0.22239    0.08351    0.02814    0.03820
PART    0

RESI 11 Pt
PT    5    0.967595    0.279841    0.701462    11.00000    0.03334    0.03953 =
         0.03742    0.01102    0.01111    0.00834

RESI 12 TOE
C9    1    0.656856    0.376476    1.078147    11.00000    0.12263    0.10067 =
         0.11250    0.02381    0.07748    0.03896
AFIX 137
H9A   2    0.618385    0.409085    1.061222    11.00000   -1.50000
H9B   2    0.686170    0.399505    1.127535    11.00000   -1.50000
H9C   2    0.619516    0.328327    1.077439    11.00000   -1.50000
AFIX  66
C8    1    0.784185    0.288549    0.925175    11.00000    0.06938    0.06327 =
         0.05305    0.00743    0.02071    0.01144
AFIX  43
H8    2    0.775914    0.244481    0.888342    11.00000   -1.20000
AFIX  65
C7    1    0.718349    0.298714    0.972654    11.00000    0.06557    0.06872 =
         0.06213    0.01773    0.02412    0.01169
AFIX  43
H7    2    0.666029    0.261448    0.967588    11.00000   -1.20000
AFIX  65
C6    1    0.730711    0.364578    1.027706    11.00000    0.08452    0.07312 =
         0.06978    0.01969    0.04234    0.02458
C5    1    0.808909    0.420277    1.035278    11.00000    0.13258    0.07231 =
         0.08378   -0.01053    0.06113    0.00125
AFIX  43
H5    2    0.817179    0.464344    1.072112    11.00000   -1.20000
AFIX  65
C4    1    0.874745    0.410112    0.987799    11.00000    0.09349    0.07882 =
         0.07014   -0.01210    0.03499   -0.01309
AFIX  43
H4    2    0.927065    0.447379    0.992866    11.00000   -1.20000
AFIX  65
C3    1    0.862385    0.344249    0.932748    11.00000    0.05494    0.06136 =
         0.04289    0.00666    0.01464    0.01180
AFIX   0
S1    4    0.947429    0.332339    0.873278    11.00000    0.04724    0.07973 =
         0.04373    0.00693    0.01110    0.01385
O1    3    1.017094    0.400671    0.894048    11.00000    0.06159    0.12131 =
         0.06891   -0.01544    0.01800   -0.01664
O2    3    0.974625    0.261247    0.876236    11.00000    0.08476    0.11434 =
         0.05518    0.02774    0.01646    0.05815
C1    1    0.893505    0.325930    0.783953    11.00000    0.04478    0.05038 =
         0.04538    0.01345    0.01792    0.01432
AFIX  13
H1    2    0.865658    0.369498    0.776071    11.00000   -1.20000
AFIX   0
C2    1    0.845088    0.251742    0.742344    11.00000    0.03607    0.05277 =
         0.04140    0.01672    0.01095    0.01113
AFIX  13
H2    2    0.842119    0.210407    0.768688    11.00000   -1.20000
AFIX   0
S2    4    0.746020    0.250106    0.680393    11.00000    0.03725    0.07557 =
         0.04728    0.02311    0.01129    0.01429
O4    3    0.730012    0.181052    0.625268    11.00000    0.05197    0.11236 =
         0.04963   -0.00348    0.00377    0.01842
O3    3    0.754542    0.321673    0.658348    11.00000    0.05195    0.11166 =
         0.08790    0.06655    0.01795    0.02298
C16   1    0.446479    0.230222    0.877157    11.00000    0.06796    0.16031 =
         0.09838    0.05584    0.04820    0.03882
AFIX 137
H16A  2    0.423812    0.277146    0.888716    11.00000   -1.50000
H16B  2    0.474676    0.219637    0.921623    11.00000   -1.50000
H16C  2    0.395904    0.189760    0.854353    11.00000   -1.50000
AFIX  66
C15   1    0.611793    0.175194    0.742139    11.00000    0.05781    0.05952 =
         0.07746    0.01596    0.02683    0.00772
AFIX  43
H15   2    0.628855    0.131042    0.717257    11.00000   -1.20000
AFIX  65
C14   1    0.543112    0.170745    0.787504    11.00000    0.06315    0.07993 =
         0.09541    0.03491    0.03461    0.00725
AFIX  43
H14   2    0.514221    0.123617    0.792972    11.00000   -1.20000
AFIX  65
C13   1    0.517612    0.236736    0.824694    11.00000    0.04957    0.10087 =
         0.07405    0.03965    0.02657    0.02620
C12   1    0.560792    0.307176    0.816520    11.00000    0.08214    0.08803 =
         0.12186    0.03163    0.05941    0.04651
AFIX  43
H12   2    0.543731    0.351327    0.841403    11.00000   -1.20000
AFIX  65
C11   1    0.629474    0.311625    0.771156    11.00000    0.07124    0.06507 =
         0.11120    0.03679    0.04453    0.02951
AFIX  43
H11   2    0.658364    0.358754    0.765688    11.00000   -1.20000
AFIX  65
C10   1    0.654975    0.245635    0.733966    11.00000    0.03647    0.06227 =
         0.05520    0.02157    0.01360    0.01479
AFIX   0

RESI  13 HPX
P     6    0.987386    0.172916    0.620646    11.00000    0.03650    0.04102 =
         0.03522    0.00786    0.00692    0.00647
AFIX  66
C18   1    1.097841    0.060116    0.624229    11.00000    0.06196    0.05113 =
         0.04816    0.00258    0.00209    0.01988
AFIX  43
H18   2    1.046325    0.025923    0.597655    11.00000   -1.20000
AFIX  65
C17   1    1.178955    0.034443    0.643193    11.00000    0.07981    0.06436 =
         0.06041    0.01010    0.00709    0.03781
AFIX  43
H17   2    1.181709   -0.016928    0.629307    11.00000   -1.20000
AFIX  65
C16   1    1.255951    0.085548    0.682911    11.00000    0.05895    0.08525 =
         0.07444    0.02422    0.00498    0.03514
AFIX  43
H16   2    1.310222    0.068370    0.695600    11.00000   -1.20000
AFIX  65
C15   1    1.251835    0.162328    0.703666    11.00000    0.04569    0.07727 =
         0.08546    0.02427   -0.00411    0.01175
AFIX  43
H15   2    1.303351    0.196520    0.730240    11.00000   -1.20000
AFIX  65
C14   1    1.170722    0.188002    0.684702    11.00000    0.04403    0.04894 =
         0.06297    0.01119    0.00119    0.00779
AFIX  43
H14   2    1.167968    0.239373    0.698588    11.00000   -1.20000
AFIX  65
C13   1    1.093724    0.136897    0.644984    11.00000    0.04165    0.04533 =
         0.03769    0.00836    0.00809    0.01119
AFIX  66
C7    1    0.899213    0.090752    0.620577    11.00000    0.04027    0.04171 =
         0.04419    0.00945    0.00641    0.00473
C8    1    0.845749    0.046533    0.556378    11.00000    0.05591    0.04968 =
         0.04937    0.00767   -0.00076   -0.00134
AFIX  43
H8    2    0.853561    0.058749    0.511227    11.00000   -1.20000
AFIX  65
C9    1    0.780611   -0.015944    0.559662    11.00000    0.06507    0.05859 =
         0.07083    0.01227   -0.01021   -0.01073
AFIX  43
H9    2    0.744840   -0.045530    0.516708    11.00000   -1.20000
AFIX  65
C10   1    0.768935   -0.034203    0.627144    11.00000    0.06531    0.06149 =
         0.08736    0.02449    0.00514   -0.01240
AFIX  43
H10   2    0.725353   -0.076005    0.629341    11.00000   -1.20000
AFIX  65
C11   1    0.822399    0.010015    0.691344    11.00000    0.06385    0.05905 =
         0.06833    0.02547    0.01607    0.00064
AFIX  43
H11   2    0.814587   -0.002202    0.736495    11.00000   -1.20000
AFIX  65
C12   1    0.887538    0.072492    0.688062    11.00000    0.05051    0.05191 =
         0.04663    0.01495    0.00687    0.00393
AFIX  43
H12   2    0.923308    0.102077    0.731016    11.00000   -1.20000
AFIX  66
C1    1    0.985174    0.174403    0.523224    11.00000    0.04981    0.05250 =
         0.03624    0.01063    0.00341    0.00084
C2    1    0.919598    0.210356    0.492566    11.00000    0.07485    0.08236 =
         0.05961    0.02885    0.00288    0.01887
AFIX  43
H2    2    0.879188    0.232515    0.521551    11.00000   -1.20000
AFIX  65
C3    1    0.914420    0.213192    0.418586    11.00000    0.10816    0.10898 =
         0.07235    0.04523   -0.01760    0.01383
AFIX  43
H3    2    0.870546    0.237247    0.398074    11.00000   -1.20000
AFIX  65
C4    1    0.974818    0.180073    0.375264    11.00000    0.13072    0.10054 =
         0.04577    0.02199    0.00444   -0.01117
AFIX  43
H4    2    0.971353    0.181971    0.325767    11.00000   -1.20000
AFIX  65
C5    1    1.040394    0.144119    0.405921    11.00000    0.10789    0.09637 =
         0.04284    0.00832    0.02258    0.00666
AFIX  43
H5    2    1.080804    0.121961    0.376936    11.00000   -1.20000
AFIX  65
C6    1    1.045573    0.141283    0.479901    11.00000    0.07260    0.07913 =
         0.04307    0.01032    0.01682    0.01595
AFIX  43
H6    2    1.089448    0.117228    0.500413    11.00000   -1.20000
AFIX   0

RESI  14 HPX
P     6    1.078978    0.377193    0.690119    11.00000    0.03881    0.03804 =
         0.04625    0.01042    0.01484    0.00774
AFIX  66
C18   1    1.162566    0.328369    0.565962    11.00000    0.10915    0.06579 =
         0.07391    0.02682    0.05381    0.03968
AFIX  43
H18   2    1.190967    0.300237    0.594860    11.00000   -1.20000
AFIX  65
C17   1    1.178169    0.322693    0.493165    11.00000    0.11208    0.06959 =
         0.07831    0.01554    0.05815    0.02170
AFIX  43
H17   2    1.217009    0.290763    0.473357    11.00000   -1.20000
AFIX  65
C16   1    1.135721    0.364739    0.449974    11.00000    0.08630    0.10746 =
         0.05801    0.02583    0.03400    0.01342
AFIX  43
H16   2    1.146160    0.360941    0.401268    11.00000   -1.20000
AFIX  65
C15   1    1.077670    0.412462    0.479579    11.00000    0.13445    0.23233 =
         0.09586    0.10086    0.07181    0.11546
AFIX  43
H15   2    1.049269    0.440593    0.450681    11.00000   -1.20000
AFIX  65
C14   1    1.062066    0.418138    0.552376    11.00000    0.10178    0.15003 =
         0.07715    0.06414    0.05080    0.07266
AFIX  43
H14   2    1.023225    0.450068    0.572183    11.00000   -1.20000
AFIX  65
C13   1    1.104513    0.376093    0.595568    11.00000    0.04633    0.04676 =
         0.05174    0.01471    0.01879    0.00458
AFIX  66
C7    1    1.037061    0.466933    0.715913    11.00000    0.04866    0.04388 =
         0.05679    0.01375    0.01933    0.01430
C8    1    1.094377    0.532573    0.757531    11.00000    0.06450    0.04773 =
         0.09687   -0.00230    0.01180    0.01552
AFIX  43
H8    2    1.154920    0.531024    0.775819    11.00000   -1.20000
AFIX  65
C9    1    1.061204    0.600528    0.771814    11.00000    0.09989    0.05214 =
         0.13572   -0.01071    0.02599    0.02401
AFIX  43
H9    2    1.099553    0.644446    0.799659    11.00000   -1.20000
AFIX  65
C10   1    0.970715    0.602844    0.744480    11.00000    0.11032    0.06990 =
         0.11480    0.01946    0.04560    0.05169
AFIX  43
H10   2    0.948520    0.648311    0.754037    11.00000   -1.20000
AFIX  65
C11   1    0.913398    0.537205    0.702863    11.00000    0.07228    0.08238 =
         0.08863    0.03309    0.03205    0.04244
AFIX  43
H11   2    0.852854    0.538754    0.684575    11.00000   -1.20000
AFIX  65
C12   1    0.946570    0.469249    0.688578    11.00000    0.05342    0.06409 =
         0.06893    0.02252    0.01991    0.02095
AFIX  43
H12   2    0.908221    0.425332    0.660733    11.00000   -1.20000
AFIX  66
C1    1    1.192163    0.393809    0.746026    11.00000    0.04001    0.04437 =
         0.05845    0.00691    0.01237    0.00984
C2    1    1.196960    0.367691    0.810876    11.00000    0.05111    0.06233 =
         0.06259    0.01396    0.00492    0.00799
AFIX  43
H2    2    1.143973    0.341686    0.823731    11.00000   -1.20000
AFIX  65
C3    1    1.280953    0.380440    0.856512    11.00000    0.07049    0.09196 =
         0.07506    0.01363   -0.00758    0.02235
AFIX  43
H3    2    1.284162    0.362965    0.899901    11.00000   -1.20000
AFIX  65
C4    1    1.360149    0.419307    0.837299    11.00000    0.05146    0.09995 =
         0.09570    0.00412   -0.00585    0.01976
AFIX  43
H4    2    1.416345    0.427837    0.867832    11.00000   -1.20000
AFIX  65
C5    1    1.355353    0.445426    0.772449    11.00000    0.04171    0.09917 =
         0.11217    0.00490    0.01254    0.00415
AFIX  43
H5    2    1.408341    0.471431    0.759594    11.00000   -1.20000
AFIX  65
C6    1    1.271361    0.432678    0.726812    11.00000    0.04447    0.07831 =
         0.08485    0.01828    0.01429    0.00324
AFIX  43
H6    2    1.268153    0.450153    0.683423    11.00000   -1.20000
AFIX   0

rem same 0.01 pt_11 > c6_14
RESI 21 Pt
PT    5    0.439411    0.222955    0.253341    11.00000    0.03103    0.03933 =
         0.03345    0.00618    0.00584    0.00910

RESI  22 TOE
C9    1   -0.092516    0.117518   -0.019465    11.00000    0.06299    0.14995 =
         0.06608    0.00420   -0.01533    0.00942
AFIX 137
H9A   2   -0.143380    0.142414   -0.007125    11.00000   -1.50000
H9B   2   -0.112055    0.063505   -0.027821    11.00000   -1.50000
H9C   2   -0.072286    0.130202   -0.063318    11.00000   -1.50000
AFIX  66
C8    1    0.086320    0.116282    0.141617    11.00000    0.06169    0.05753 =
         0.08925    0.01078   -0.01776    0.00652
AFIX  43
H8    2    0.105333    0.081742    0.167621    11.00000   -1.20000
AFIX  65
C7    1    0.015410    0.091934    0.082579    11.00000    0.06343    0.06868 =
         0.09669   -0.00140   -0.01758    0.00409
AFIX  43
H7    2   -0.013021    0.041103    0.069082    11.00000   -1.20000
AFIX  65
C6    1   -0.013007    0.143557    0.043712    11.00000    0.04255    0.10055 =
         0.05175    0.00524    0.00299    0.01610
C5    1    0.029486    0.219530    0.063884    11.00000    0.05649    0.09430 =
         0.06518    0.03118   -0.00050    0.01321
AFIX  43
H5    2    0.010473    0.254069    0.037879    11.00000   -1.20000
AFIX  65
C4    1    0.100396    0.243879    0.122922    11.00000    0.05266    0.06920 =
         0.05972    0.02284    0.00150    0.00786
AFIX  43
H4    2    0.128826    0.294710    0.136418    11.00000   -1.20000
AFIX  65
C3    1    0.128814    0.192256    0.161789    11.00000    0.03393    0.05609 =
         0.04369    0.00855    0.00707    0.01268
AFIX   0
S1    4    0.217327    0.223294    0.238023    11.00000    0.03619    0.05622 =
         0.03740    0.00777    0.00965    0.01168
O1    3    0.196671    0.290609    0.282666    11.00000    0.05425    0.08636 =
         0.05309   -0.01270    0.01561    0.02199
O2    3    0.224371    0.158539    0.269358    11.00000    0.05102    0.08108 =
         0.06096    0.03654    0.00606    0.00410
C1    1    0.319047    0.248595    0.201370    11.00000    0.03540    0.04263 =
         0.03855    0.00883    0.00830    0.01080
AFIX  13
H1    2    0.326078    0.296835    0.185476    11.00000   -1.20000
AFIX   0
C2    1    0.351248    0.186466    0.155134    11.00000    0.03564    0.04593 =
         0.03238    0.00643    0.00491    0.01230
AFIX  13
H2    2    0.312332    0.136328    0.148378    11.00000   -1.20000
AFIX   0
S2    4    0.398572    0.204660    0.076993    11.00000    0.04084    0.07027 =
         0.03584    0.00987    0.01065    0.01491
O4    3    0.467074    0.157761    0.061782    11.00000    0.05350    0.12756 =
         0.04645    0.00897    0.01355    0.04590
O3    3    0.425964    0.284947    0.085569    11.00000    0.07232    0.07593 =
         0.05797    0.01878    0.01755   -0.00724
C16   1    0.078635    0.088895   -0.168805    11.00000    0.07403    0.19001 =
         0.05357    0.02165   -0.00773    0.00237
AFIX 137
H16A  2    0.032711    0.120651   -0.161797    11.00000   -1.50000
H16B  2    0.051818    0.037632   -0.168538    11.00000   -1.50000
H16C  2    0.100483    0.090238   -0.215215    11.00000   -1.50000
AFIX  66
C15   1    0.286492    0.094830   -0.029037    11.00000    0.06974    0.07178 =
         0.06280   -0.00028   -0.00513    0.02711
AFIX  43
H15   2    0.322738    0.061646   -0.014491    11.00000   -1.20000
AFIX  65
C14   1    0.212764    0.067834   -0.085583    11.00000    0.07746    0.09090 =
         0.06659   -0.01016   -0.00762    0.01643
AFIX  43
H14   2    0.199681    0.016589   -0.108871    11.00000   -1.20000
AFIX  65
C13   1    0.158590    0.117431   -0.107323    11.00000    0.05596    0.12493 =
         0.03948    0.01531    0.00396    0.01482
C12   1    0.178145    0.194024   -0.072517    11.00000    0.06078    0.10961 =
         0.05745    0.03133    0.00007    0.03004
AFIX  43
H12   2    0.141899    0.227207   -0.087063    11.00000   -1.20000
AFIX  65
C11   1    0.251873    0.221020   -0.015970    11.00000    0.06073    0.07655 =
         0.05563    0.02090    0.00730    0.02810
AFIX  43
H11   2    0.264956    0.272266    0.007317    11.00000   -1.20000
AFIX  65
C10   1    0.306047    0.171424    0.005771    11.00000    0.04545    0.06448 =
         0.03470    0.01126    0.00897    0.01981
AFIX   0

RESI 23 HPX
P     6    0.530065    0.131355    0.246339    11.00000    0.03246    0.04127 =
         0.03474    0.00629    0.00681    0.01079
AFIX  66
C18   1    0.515050    0.029174    0.341340    11.00000    0.06749    0.07436 =
         0.06152    0.03163    0.00965    0.00725
AFIX  43
H18   2    0.470496   -0.002574    0.304802    11.00000   -1.20000
AFIX  65
C17   1    0.538401    0.007346    0.406815    11.00000    0.08898    0.10810 =
         0.08631    0.06240    0.02047    0.02010
AFIX  43
H17   2    0.509470   -0.039008    0.414084    11.00000   -1.20000
AFIX  65
C16   1    0.604993    0.054798    0.461427    11.00000    0.09104    0.13271 =
         0.05839    0.05007    0.01837    0.05216
AFIX  43
H16   2    0.620616    0.040193    0.505234    11.00000   -1.20000
AFIX  65
C15   1    0.648234    0.124079    0.450564    11.00000    0.08567    0.10249 =
         0.04478    0.01570   -0.00672    0.02930
AFIX  43
H15   2    0.692789    0.155828    0.487103    11.00000   -1.20000
AFIX  65
C14   1    0.624884    0.145909    0.385089    11.00000    0.08000    0.06230 =
         0.04435    0.00859   -0.00751    0.01685
AFIX  43
H14   2    0.653816    0.192263    0.377821    11.00000   -1.20000
AFIX  65
C13   1    0.558293    0.098457    0.330477    11.00000    0.04570    0.05264 =
         0.03869    0.01224    0.00908    0.01800
AFIX  66
C7    1    0.466028    0.045388    0.181063    11.00000    0.04051    0.04251 =
         0.03865    0.00405    0.00729    0.01170
C8    1    0.503626    0.008827    0.121546    11.00000    0.05431    0.05286 =
         0.04666    0.00001    0.01438    0.01355
AFIX  43
H8    2    0.564851    0.025248    0.115996    11.00000   -1.20000
AFIX  65
C9    1    0.449718   -0.052276    0.070325    11.00000    0.07710    0.05617 =
         0.05132   -0.00901    0.01064    0.01484
AFIX  43
H9    2    0.474874   -0.076737    0.030505    11.00000   -1.20000
AFIX  65
C10   1    0.358210   -0.076819    0.078620    11.00000    0.07417    0.05398 =
         0.06471   -0.01018   -0.00535    0.00797
AFIX  43
H10   2    0.322142   -0.117701    0.044349    11.00000   -1.20000
AFIX  65
C11   1    0.320611   -0.040259    0.138136    11.00000    0.04806    0.05380 =
         0.07079   -0.00071    0.00283    0.00439
AFIX  43
H11   2    0.259386   -0.056680    0.143685    11.00000   -1.20000
AFIX  65
C12   1    0.374519    0.020844    0.189357    11.00000    0.04095    0.04726 =
         0.05152    0.00383    0.00818    0.00841
AFIX  43
H12   2    0.349362    0.045305    0.229178    11.00000   -1.20000
AFIX  66
C1    1    0.642804    0.147433    0.214181    11.00000    0.03340    0.05547 =
         0.04189    0.00581    0.00856    0.00928
C2    1    0.658455    0.199466    0.169956    11.00000    0.04397    0.08586 =
         0.05606    0.02680    0.01415    0.00937
AFIX  43
H2    2    0.611569    0.224693    0.156436    11.00000   -1.20000
AFIX  65
C3    1    0.744184    0.213795    0.145936    11.00000    0.06029    0.11723 =
         0.07254    0.03053    0.02923    0.00157
AFIX  43
H3    2    0.754656    0.248608    0.116347    11.00000   -1.20000
AFIX  65
C4    1    0.814262    0.176090    0.166142    11.00000    0.04262    0.12101 =
         0.07735   -0.00096    0.02445    0.00648
AFIX  43
H4    2    0.871621    0.185677    0.150072    11.00000   -1.20000
AFIX  65
C5    1    0.798612    0.124058    0.210367    11.00000    0.04122    0.09548 =
         0.08456   -0.00598    0.01397    0.02440
AFIX  43
H5    2    0.845499    0.098831    0.223886    11.00000   -1.20000
AFIX  65
C6    1    0.712884    0.109728    0.234387    11.00000    0.04186    0.06617 =
         0.06913    0.00813    0.01103    0.02064
AFIX  43
H6    2    0.702412    0.074915    0.263977    11.00000   -1.20000
AFIX   0

RESI 24 HPX
RESI 24 HPX
rem same_14 0.01 p > c6
PART    1
PA    6    0.495224    0.313060    0.366114    21.00000    0.03767    0.04576 =
         0.03159   -0.00494    0.00504    0.00528
AFIX  66
C18A  1    0.663551    0.336131    0.461568    21.00000    0.04723    0.05006 =
         0.04481   -0.00030    0.00184    0.00702
AFIX  43
H18A  2    0.628261    0.326790    0.498271    21.00000   -1.20000
AFIX  65
C17A  1    0.759634    0.352309    0.476887    21.00000    0.05456    0.06083 =
         0.07183   -0.00282   -0.01145    0.00935
AFIX  43
H17A  2    0.788630    0.353791    0.523840    21.00000   -1.20000
AFIX  65
C16A  1    0.812380    0.366271    0.422030    21.00000    0.04359    0.07463 =
         0.10639    0.00409    0.00063    0.00075
AFIX  43
H16A  2    0.876666    0.377094    0.432280    21.00000   -1.20000
AFIX  65
C15A  1    0.769044    0.364055    0.351854    21.00000    0.04546    0.05979 =
         0.17483    0.03775    0.03640    0.00481
AFIX  43
H15A  2    0.804335    0.373397    0.315151    21.00000   -1.20000
AFIX  65
C14A  1    0.672961    0.347878    0.336533    21.00000    0.05861    0.03796 =
         0.06600    0.01057    0.02497    0.00141
AFIX  43
H14A  2    0.643967    0.346396    0.289580    21.00000   -1.20000
AFIX  65
C13A  1    0.620214    0.333916    0.391390    21.00000    0.03889    0.03732 =
         0.04479    0.00299    0.00947    0.00489
AFIX  66
C7A   1    0.469960    0.410260    0.365366    21.00000    0.05838    0.04723 =
         0.04872   -0.01022    0.00002    0.01720
C8A   1    0.377581    0.416383    0.350099    21.00000    0.05889    0.06538 =
         0.14504   -0.03362   -0.02023    0.02386
AFIX  43
H8A   2    0.331667    0.373233    0.340284    21.00000   -1.20000
AFIX  65
C9A   1    0.353826    0.486997    0.349501    21.00000    0.10232    0.07660 =
         0.18363   -0.05247   -0.05889    0.05560
AFIX  43
H9A   2    0.292018    0.491092    0.339286    21.00000   -1.20000
AFIX  65
C10A  1    0.422450    0.551489    0.364171    21.00000    0.14757    0.07296 =
         0.06532   -0.00647   -0.01326    0.06176
AFIX  43
H10A  2    0.406556    0.598735    0.363771    21.00000   -1.20000
AFIX  65
C11A  1    0.514830    0.545368    0.379438    21.00000    0.12019    0.05507 =
         0.06818    0.01114    0.01181    0.02030
AFIX  43
H11A  2    0.560744    0.588519    0.389253    21.00000   -1.20000
AFIX  65
C12A  1    0.538586    0.474755    0.380036    21.00000    0.07238    0.05169 =
         0.07130    0.01059    0.00990    0.01498
AFIX  43
H12A  2    0.600394    0.470659    0.390251    21.00000   -1.20000
AFIX  66
C1A   1    0.458427    0.268999    0.440642    21.00000    0.04308    0.03113 =
         0.03833    0.00154    0.00596    0.00786
C2A   1    0.367352    0.235670    0.441479    21.00000    0.05096    0.05103 =
         0.04915    0.01506    0.00847    0.00246
AFIX  43
H2A   2    0.322136    0.233720    0.402318    21.00000   -1.20000
AFIX  65
C3A   1    0.343858    0.205256    0.500848    21.00000    0.06849    0.05529 =
         0.06481    0.01946    0.02212    0.00785
AFIX  43
H3A   2    0.282923    0.182957    0.501408    21.00000   -1.20000
AFIX  65
C4A   1    0.411439    0.208170    0.559380    21.00000    0.09078    0.06940 =
         0.05410    0.02777    0.02143    0.02101
AFIX  43
H4A   2    0.395719    0.187821    0.599102    21.00000   -1.20000
AFIX  65
C5A   1    0.502514    0.241499    0.558544    21.00000    0.09251    0.10208 =
         0.05111    0.03358    0.00532    0.02787
AFIX  43
H5A   2    0.547730    0.243449    0.597706    21.00000   -1.20000
AFIX  65
C6A   1    0.526009    0.271914    0.499176    21.00000    0.05113    0.07757 =
         0.05148    0.01613    0.00218    0.01497
AFIX  43
H6A   2    0.586945    0.294213    0.498616    21.00000   -1.20000
AFIX   0
PART    2
rem same_24 0.01 Pa > C6a
PB    6    0.483858    0.306300    0.359637   -21.00000    0.03127    0.03464 =
         0.03661    0.00258    0.00448    0.00531
AFIX  66
C18B  1    0.634425    0.414908    0.439316   -21.00000    0.05231    0.06571 =
         0.08436   -0.01861   -0.00116   -0.00243
AFIX  43
H18B  2    0.592213    0.433330    0.468796   -21.00000   -1.20000
AFIX  65
C17B  1    0.727246    0.449231    0.454363   -21.00000    0.06195    0.07438 =
         0.12091   -0.00696   -0.01747   -0.02022
AFIX  43
H17B  2    0.747137    0.490618    0.493911   -21.00000   -1.20000
AFIX  65
C16B  1    0.790337    0.421698    0.410303   -21.00000    0.04406    0.07216 =
         0.15502    0.02637   -0.00268   -0.01392
AFIX  43
H16B  2    0.852441    0.444663    0.420370   -21.00000   -1.20000
AFIX  65
C15B  1    0.760608    0.359840    0.351194   -21.00000    0.05316    0.08021 =
         0.08349    0.01558    0.02780   -0.00428
AFIX  43
H15B  2    0.802820    0.341419    0.321715   -21.00000   -1.20000
AFIX  65
C14B  1    0.667787    0.325516    0.336146   -21.00000    0.04169    0.03441 =
         0.07547    0.00697    0.01353    0.00265
AFIX  43
H14B  2    0.647896    0.284129    0.296598   -21.00000   -1.20000
AFIX  65
C13B  1    0.604695    0.353049    0.380206   -21.00000    0.03899    0.03559 =
         0.05253    0.00497    0.00209   -0.00117
AFIX  66
C7B   1    0.427173    0.387934    0.363853   -21.00000    0.04141    0.03213 =
         0.04339    0.00212    0.00364    0.00561
C8B   1    0.382687    0.417159    0.422374   -21.00000    0.06443    0.03843 =
         0.05468    0.00152    0.01456    0.01395
AFIX  43
H8B   2    0.378195    0.393124    0.461519   -21.00000   -1.20000
AFIX  65
C9B   1    0.344913    0.482307    0.422388   -21.00000    0.06701    0.04565 =
         0.07791   -0.00048    0.01805    0.02033
AFIX  43
H9B   2    0.315148    0.501860    0.461543   -21.00000   -1.20000
AFIX  65
C10B  1    0.351625    0.518231    0.363881   -21.00000    0.05861    0.03460 =
         0.09164    0.00835    0.00075    0.01163
AFIX  43
H10B  2    0.326352    0.561819    0.363891   -21.00000   -1.20000
AFIX  65
C11B  1    0.396112    0.489007    0.305359   -21.00000    0.08130    0.04614 =
         0.08514    0.02410    0.00258    0.01574
AFIX  43
H11B  2    0.400602    0.513043    0.266214   -21.00000   -1.20000
AFIX  65
C12B  1    0.433886    0.423859    0.305344   -21.00000    0.06445    0.04710 =
         0.05780    0.01220    0.01006    0.01398
AFIX  43
H12B  2    0.463650    0.404306    0.266189   -21.00000   -1.20000
AFIX  66
C1B   1    0.452872    0.292890    0.449096   -21.00000    0.04197    0.06321 =
         0.03315   -0.00379    0.00910   -0.00548
C2B   1    0.453823    0.350362    0.510725   -21.00000    0.06800    0.09468 =
         0.05289   -0.01761    0.02583   -0.01219
AFIX  43
H2B   2    0.468474    0.400985    0.507949   -21.00000   -1.20000
AFIX  65
C3B   1    0.432876    0.332171    0.576504   -21.00000    0.10608    0.15571 =
         0.04997   -0.02611    0.03454   -0.03727
AFIX  43
H3B   2    0.433512    0.370624    0.617738   -21.00000   -1.20000
AFIX  65
C4B   1    0.410978    0.256509    0.580655   -21.00000    0.09731    0.17577 =
         0.05205    0.02368    0.02178   -0.02816
AFIX  43
H4B   2    0.396963    0.244339    0.624666   -21.00000   -1.20000
AFIX  65
C5B   1    0.410027    0.199037    0.519027   -21.00000    0.10790    0.10981 =
         0.07873    0.03156    0.03502   -0.02093
AFIX  43
H5B   2    0.395375    0.148414    0.521804   -21.00000   -1.20000
AFIX  65
C6B   1    0.430974    0.217226    0.453247   -21.00000    0.06556    0.08349 =
         0.05328    0.00230    0.02007   -0.00867
AFIX  43
H6B   2    0.430337    0.178774    0.412013   -21.00000   -1.20000

AFIX   0
HKLF 4


REM  X4ESxT-23May085352_a.res in P-1
REM wR2 = 0.0940, GooF = S = 1.055, Restrained GooF = 1.055 for all data
REM R1 = 0.0343 for 34524 Fo > 4sig(Fo) and 0.0428 for all 40702 data
REM 1150 parameters refined using 70 restraints

END

WGHT      0.0000      2.7927

REM Highest difference peak  1.069,  deepest hole -2.534,  1-sigma level  0.095
Q1    1   0.4616  0.2557  0.2554  11.00000  0.05    1.07
Q2    1   0.9830  0.3167  0.7502  11.00000  0.05    0.81
Q3    1   0.9141  0.2403  0.8537  11.00000  0.05    0.72
Q4    1   0.9422  0.2190  0.6797  11.00000  0.05    0.70
Q5    1   0.9952  0.3421  0.7245  11.00000  0.05    0.69
Q6    1   1.0837  0.3803  0.4716  11.00000  0.05    0.68
Q7    1   0.4193  0.1606  0.2375  11.00000  0.05    0.67
Q8    1   0.4384  0.2632  0.3076  11.00000  0.05    0.67
Q9    1   1.0634  0.3879  0.5498  11.00000  0.05    0.64
Q10   1   0.9597  0.2184  0.7067  11.00000  0.05    0.61
Q11   1   0.4737  0.2904  0.2745  11.00000  0.05    0.58
Q12   1   0.7459  0.3118  0.6938  11.00000  0.05    0.52
Q13   1   0.4744  0.2321  0.3141  11.00000  0.05    0.52
Q14   1   0.9216  0.2696  0.6470  11.00000  0.05    0.51
Q15   1   0.3578  0.2080  0.2438  11.00000  0.05    0.51
Q16   1   0.4338  0.1683  0.2728  11.00000  0.05    0.48
Q17   1   1.1066  0.4405  0.5685  11.00000  0.05    0.47
Q18   1   0.4941  0.2620  0.2309  11.00000  0.05    0.47
Q19   1   0.5029  0.2340  0.2955  11.00000  0.05    0.46
Q20   1   0.3989  0.2134  0.1882  11.00000  0.05    0.45
;
_shelx_res_checksum   87750

_shelx_hkl_file
;
  24   0  -1    0.38    0.16
 -24   1   1    0.70    0.22
  24  -1  -1    1.14    0.21
 -24   2   1    2.11    0.36
  24  -2  -1    2.76    0.38
 -24   3   1    1.23    0.25
  24  -3  -1    1.14    0.23
 -24   4   1    3.00    0.41
  24  -4  -1    2.34    0.39
 -24   5   1    1.10    0.25
  24  -5  -1    1.11    0.25
  24  -6  -1    1.29    0.28
 -23  -5   2   -0.22    0.20
  23   5  -2    0.16    0.14
 -23  -4   1    0.26    0.19
  23   4  -1    0.40    0.15
 -23  -4   2   -0.16    0.18
  23   4  -2    0.05    0.11
 -23  -4   3   -0.12    0.15
  23   4  -3    0.19    0.14
 -23  -3   1    2.15    0.41
  23   3  -1    2.92    0.38
 -23  -3   2    0.46    0.19
  23   3  -2    0.18    0.14
 -23  -3   3    3.92    0.60
  23   3  -3    4.66    0.59
 -23  -3   4   -0.03    0.15
  23   3  -4    0.27    0.14
 -23  -2   1    0.09    0.16
  23   2  -1   -0.17    0.13
 -23  -2   2    0.13    0.18
  23   2  -2   -0.41    0.14
  23   2  -3   -0.04    0.11
 -23  -2   4   -0.10    0.18
 -23  -2   5   -0.50    0.18
  23   2  -5    0.21    0.11
 -23  -1   1    2.37    0.36
  23   1  -1    2.06    0.33
 -23  -1   2    1.48    0.28
  23   1  -2    1.53    0.26
 -23  -1   3    4.32    0.56
  23   1  -3    3.63    0.54
 -23  -1   4    0.76    0.21
  23   1  -4    0.80    0.18
 -23  -1   5    4.66    0.70
  23   1  -5    5.53    0.69
 -23   0   1   -0.38    0.17
 -23   0   1   -0.07    0.17
 -23   0   1   -0.12    0.18
  23   0  -1   -0.19    0.14
  23   0  -1   -0.14    0.13
  23   0  -2    0.25    0.15
 -23   0   3    0.22    0.15
  23   0  -3    0.07    0.15
 -23   0   4   -0.01    0.17
  23   0  -4    0.01    0.11
 -23   0   5    0.14    0.18
  23   0  -5    0.16    0.12
 -23   0   6   -0.13    0.17
  23   0  -6    0.14    0.12
 -23   1   1    0.94    0.22
 -23   1   1    1.08    0.20
 -23   1   1    0.83    0.23
  23  -1  -1    1.13    0.21
  23  -1  -1    0.80    0.20
 -23   1   2    3.92    0.63
 -23   1   2    3.98    0.65
  23  -1  -2    5.32    0.64
  23  -1  -2    5.29    0.65
 -23   1   3    2.15    0.34
  23  -1  -3    2.33    0.32
  23  -1  -3    1.69    0.34
 -23   1   4    2.65    0.39
  23  -1  -4    2.50    0.37
 -23   1   5    3.58    0.53
  23  -1  -5    3.97    0.53
 -23   1   6    0.33    0.18
  23  -1  -6    0.89    0.18
 -23   2   1    0.11    0.18
 -23   2   1    0.19    0.13
 -23   2   1    0.02    0.16
  23  -2  -1    0.27    0.15
  23  -2  -1    0.36    0.13
 -23   2   2    0.27    0.14
 -23   2   2    0.30    0.16
  23  -2  -2    0.30    0.16
  23  -2  -2    0.02    0.12
 -23   2   3   -0.03    0.15
 -23   2   3   -0.27    0.13
  23  -2  -3    0.04    0.13
  23  -2  -3   -0.17    0.12
 -23   2   4    0.46    0.17
  23  -2  -4    0.30    0.16
 -23   2   5    0.41    0.14
  23  -2  -5    0.14    0.15
 -23   2   6    0.63    0.18
  23  -2  -6    0.59    0.17
 -23   3   1   -0.22    0.16
 -23   3   1   -0.43    0.16
 -23   3   1    0.22    0.15
  23  -3  -1   -0.21    0.13
  23  -3  -1   -0.20    0.12
 -23   3   2    5.26    0.78
 -23   3   2    5.47    0.81
  23  -3  -2    7.24    0.81
 -23   3   3    1.27    0.22
 -23   3   3    1.40    0.25
  23  -3  -3    0.87    0.21
  23  -3  -3    1.15    0.22
 -23   3   4    2.39    0.38
 -23   3   4    2.10    0.42
  23  -3  -4    3.23    0.40
  23  -3  -4    2.97    0.40
 -23   3   5    3.03    0.38
  23  -3  -5    2.15    0.37
 -23   3   6    1.32    0.22
  23  -3  -6    1.20    0.24
 -23   4   1    0.31    0.17
 -23   4   1   -0.18    0.15
 -23   4   1    0.49    0.17
  23  -4  -1    0.09    0.13
  23  -4  -1   -0.02    0.12
 -23   4   2   -0.17    0.12
 -23   4   2    0.15    0.16
  23  -4  -2    0.30    0.16
  23  -4  -2    0.16    0.12
 -23   4   3    0.57    0.15
 -23   4   3    0.03    0.14
  23  -4  -3    0.08    0.15
  23  -4  -3    0.19    0.12
 -23   4   4    0.15    0.12
 -23   4   4    0.45    0.17
  23  -4  -4   -0.03    0.15
  23  -4  -4    0.20    0.13
 -23   4   5    0.23    0.13
  23  -4  -5    0.26    0.13
 -23   4   6    0.79    0.16
  23  -4  -6    0.30    0.18
 -23   5   1    0.31    0.19
 -23   5   1   -0.07    0.15
 -23   5   1    0.71    0.17
  23  -5  -1    0.23    0.14
  23  -5  -1    0.20    0.12
 -23   5   2    5.74    0.77
 -23   5   2    5.40    0.80
  23  -5  -2    6.55    0.78
  23  -5  -2    5.22    0.77
 -23   5   3    0.17    0.14
 -23   5   3    0.01    0.15
  23  -5  -3    0.16    0.15
  23  -5  -3    0.25    0.13
 -23   5   4    4.68    0.63
 -23   5   4    3.73    0.65
  23  -5  -4    5.32    0.65
  23  -5  -4    4.90    0.65
 -23   5   5    1.44    0.22
  23  -5  -5    1.16    0.23
 -23   5   6    2.34    0.37
  23  -5  -6    2.76    0.39
 -23   6   1    0.26    0.16
  23  -6  -1    0.08    0.13
 -23   6   2    0.21    0.14
  23  -6  -2    0.53    0.17
  23  -6  -2    0.27    0.13
 -23   6   3   -0.15    0.15
  23  -6  -3   -0.27    0.13
  23  -6  -3    0.13    0.11
 -23   6   4    0.17    0.15
  23  -6  -4    0.17    0.15
  23  -6  -4    0.17    0.13
 -23   6   5    0.21    0.13
  23  -6  -5    0.40    0.16
 -23   7   1    2.32    0.36
 -23   7   1    2.74    0.38
  23  -7  -1    1.86    0.36
  23  -7  -1    2.60    0.37
 -23   7   2    5.37    0.62
 -23   7   2    3.84    0.62
  23  -7  -2    3.71    0.60
  23  -7  -2    4.63    0.61
 -23   7   3    0.43    0.18
 -23   7   3    0.34    0.18
  23  -7  -3    0.52    0.16
  23  -7  -3    0.80    0.17
 -23   7   4    5.94    0.85
  23  -7  -4    6.80    0.86
 -23   7   5    0.15    0.16
  23  -7  -5    0.10    0.16
 -23   8   1   -0.11    0.14
 -23   8   1    0.27    0.16
  23  -8  -1    0.41    0.18
  23  -8  -1    0.42    0.13
 -23   8   2   -0.49    0.17
 -23   8   2   -0.11    0.15
  23  -8  -2   -0.24    0.17
  23  -8  -2    0.05    0.11
 -23   8   3    0.40    0.17
 -23   8   3   -0.02    0.15
  23  -8  -3    0.45    0.15
  23  -8  -3   -0.15    0.13
 -23   8   4   -0.22    0.16
  23  -8  -4   -0.21    0.16
 -23   9   1    3.77    0.46
 -23   9   1    3.07    0.47
  23  -9  -1    2.80    0.46
  23  -9  -1    2.88    0.46
 -23   9   2    2.05    0.32
 -23   9   2    1.98    0.32
  23  -9  -2    1.66    0.32
  23  -9  -2    1.65    0.30
 -23   9   3    1.51    0.27
  23  -9  -3    1.60    0.27
 -23  10   1    0.66    0.21
 -23  10   1    0.68    0.18
  23 -10  -1    0.15    0.19
  23 -10  -1    0.26    0.15
 -23  10   2   -0.11    0.18
  23 -10  -2   -0.10    0.18
  23 -11  -1    2.45    0.41
 -22  -8   2    2.22    0.39
  22   8  -2    2.46    0.35
  22   8  -3    0.51    0.14
 -22  -7   1   -0.33    0.15
  22   7  -1    0.08    0.13
 -22  -7   2    0.36    0.20
  22   7  -2    0.35    0.12
 -22  -7   3    0.07    0.18
  22   7  -3    0.09    0.12
  22   7  -4    1.21    0.21
 -22  -6   1    0.10    0.19
  22   6  -1    0.23    0.13
 -22  -6   2    2.33    0.40
  22   6  -2    2.78    0.37
 -22  -6   3    0.49    0.20
  22   6  -3    0.51    0.14
 -22  -6   4    1.42    0.28
  22   6  -4    1.80    0.26
 -22  -6   5    1.19    0.25
  22   6  -5    1.10    0.20
 -22  -6   6    0.39    0.20
  22   6  -6    0.56    0.13
 -22  -5   1    0.02    0.13
 -22  -5   1   -0.04    0.17
  22   5  -1   -0.03    0.10
 -22  -5   2    0.28    0.15
  22   5  -2    0.31    0.13
 -22  -5   3    0.07    0.17
  22   5  -3    0.30    0.11
 -22  -5   4    1.29    0.26
 -22  -5   5    0.46    0.19
  22   5  -5    0.38    0.12
 -22  -5   6    1.33    0.25
  22   5  -6    1.46    0.22
 -22  -5   7    0.76    0.23
  22   5  -7    1.52    0.21
 -22  -4   1    0.64    0.19
 -22  -4   1    0.75    0.19
  22   4  -1    0.20    0.14
 -22  -4   2    4.27    0.58
 -22  -4   2    4.08    0.56
 -22  -4   2    2.22    0.56
  22   4  -2    4.67    0.55
  22   4  -2    4.50    0.56
 -22  -4   3    0.01    0.16
 -22  -4   3    0.35    0.15
 -22  -4   3    0.05    0.15
  22   4  -3   -0.13    0.12
  22   4  -3   -0.06    0.10
 -22  -4   4    3.43    0.62
  22   4  -4    5.40    0.61
 -22  -4   5    0.64    0.17
  22   4  -5    0.54    0.13
 -22  -4   6    1.56    0.29
  22   4  -6    1.87    0.27
 -22  -4   7    0.57    0.20
  22   4  -7    0.83    0.15
 -22  -4   8    0.38    0.16
  22   4  -8    0.22    0.12
 -22  -3   1    0.00    0.16
 -22  -3   1    0.04    0.18
 -22  -3   1    0.15    0.18
  22   3  -1   -0.01    0.11
  22   3  -1    0.22    0.13
 -22  -3   2    0.35    0.18
 -22  -3   2    0.48    0.21
 -22  -3   2    0.24    0.16
  22   3  -2    0.45    0.13
 -22  -3   3   -0.04    0.13
 -22  -3   3   -0.15    0.16
 -22  -3   3   -0.09    0.15
  22   3  -3   -0.15    0.12
  22   3  -3    0.21    0.12
 -22  -3   4    0.64    0.20
  22   3  -4    1.04    0.17
  22   3  -4    0.59    0.17
 -22  -3   5    0.03    0.17
 -22  -3   5    0.07    0.13
  22   3  -5   -0.10    0.12
  22   3  -5    0.04    0.10
 -22  -3   6    1.75    0.31
  22   3  -6    1.95    0.28
 -22  -3   7    0.19    0.14
  22   3  -7    0.22    0.10
 -22  -3   8    1.90    0.33
  22   3  -8    2.24    0.31
 -22  -2   1    2.21    0.40
 -22  -2   1    2.24    0.39
 -22  -2   1    3.11    0.42
  22   2  -1    3.19    0.39
  22   2  -1    2.57    0.39
 -22  -2   2    3.29    0.51
 -22  -2   2    2.93    0.52
  22   2  -2    3.77    0.50
  22   2  -2    4.18    0.51
 -22  -2   3    0.36    0.18
 -22  -2   3    0.25    0.16
 -22  -2   3    0.18    0.16
  22   2  -3    0.68    0.15
  22   2  -3    0.62    0.14
 -22  -2   4    5.34    0.70
 -22  -2   4    5.58    0.70
 -22  -2   4    3.53    0.69
  22   2  -4    5.85    0.68
  22   2  -4    4.82    0.68
 -22  -2   5   -0.21    0.14
 -22  -2   5   -0.05    0.14
  22   2  -5    0.08    0.10
  22   2  -5   -0.06    0.10
 -22  -2   6    3.54    0.53
 -22  -2   6    3.46    0.55
  22   2  -6    4.14    0.52
  22   2  -6    3.79    0.53
 -22  -2   7    0.22    0.16
 -22  -2   7    0.35    0.16
  22   2  -7    0.38    0.11
  22   2  -7    0.29    0.12
 -22  -2   8    1.60    0.29
  22   2  -8    2.16    0.29
 -22  -2   9    1.15    0.22
  22   2  -9    1.12    0.19
 -22  -1   1    0.09    0.15
 -22  -1   1   -0.03    0.16
 -22  -1   1   -0.33    0.14
  22   1  -1   -0.15    0.13
  22   1  -1   -0.06    0.13
 -22  -1   2    0.41    0.17
 -22  -1   2    0.31    0.16
 -22  -1   2   -0.04    0.17
  22   1  -2    0.50    0.14
  22   1  -2    0.33    0.13
 -22  -1   3   -0.11    0.15
 -22  -1   3    0.03    0.14
  22   1  -3    0.09    0.10
 -22  -1   4    0.04    0.14
 -22  -1   4    0.60    0.17
 -22  -1   4    0.12    0.15
  22   1  -4    0.52    0.12
  22   1  -4    0.39    0.12
 -22  -1   5    0.38    0.14
 -22  -1   5    0.28    0.16
 -22  -1   5    0.33    0.16
  22   1  -5    0.09    0.10
  22   1  -5   -0.05    0.10
 -22  -1   6    2.14    0.34
 -22  -1   6    1.63    0.36
  22   1  -6    2.71    0.33
  22   1  -6    2.11    0.33
 -22  -1   7    0.04    0.13
 -22  -1   7   -0.07    0.14
  22   1  -7    0.19    0.12
  22   1  -7   -0.10    0.10
 -22  -1   8    4.63    0.63
 -22  -1   8    3.66    0.65
  22   1  -8    5.28    0.63
  22   1  -8    4.46    0.63
 -22  -1   9    1.18    0.21
  22   1  -9    0.82    0.18
 -22   0   1    3.64    0.57
 -22   0   1    4.09    0.57
 -22   0   1    4.30    0.60
  22   0  -1    4.41    0.56
  22   0  -1    4.00    0.57
 -22   0   2    2.11    0.33
 -22   0   2    1.96    0.32
 -22   0   2    1.64    0.34
  22   0  -2    2.26    0.31
  22   0  -2    2.13    0.32
 -22   0   3    1.39    0.27
 -22   0   3    1.73    0.30
  22   0  -3    1.41    0.26
  22   0  -3    2.11    0.28
 -22   0   4    3.91    0.51
 -22   0   4    3.11    0.49
 -22   0   4    2.78    0.50
  22   0  -4    3.84    0.49
  22   0  -4    3.61    0.49
 -22   0   5    1.19    0.20
 -22   0   5    0.75    0.20
 -22   0   5    1.11    0.22
  22   0  -5    0.82    0.18
  22   0  -5    0.67    0.17
 -22   0   6    2.59    0.36
 -22   0   6    2.01    0.38
  22   0  -6    2.37    0.34
  22   0  -6    2.35    0.35
 -22   0   7    0.10    0.14
 -22   0   7    0.34    0.15
  22   0  -7   -0.11    0.10
  22   0  -7    0.06    0.10
 -22   0   8    0.49    0.21
 -22   0   8    1.23    0.24
  22   0  -8    1.00    0.19
  22   0  -8    1.76    0.22
 -22   0   9   -0.02    0.14
  22   0  -9   -0.11    0.13
 -22   0  10    0.17    0.17
  22   0 -10    0.28    0.15
 -22   1   1   -0.02    0.15
 -22   1   1    0.17    0.14
 -22   1   1    0.00    0.15
 -22   1   1    0.40    0.18
  22  -1  -1   -0.11    0.11
 -22   1   2    0.33    0.16
 -22   1   2    0.23    0.13
 -22   1   2   -0.06    0.15
 -22   1   2    0.30    0.16
  22  -1  -2    0.47    0.14
  22  -1  -2    0.31    0.12
 -22   1   3    0.62    0.18
 -22   1   3    0.09    0.16
 -22   1   3    0.59    0.19
  22  -1  -3    0.44    0.14
  22  -1  -3    0.73    0.15
 -22   1   4    1.26    0.23
 -22   1   4    0.79    0.24
 -22   1   4    0.87    0.23
  22  -1  -4    1.36    0.21
 -22   1   5    0.40    0.17
 -22   1   5    1.01    0.19
 -22   1   5    0.96    0.20
  22  -1  -5    0.66    0.16
  22  -1  -5    0.70    0.16
 -22   1   6    4.06    0.57
 -22   1   6    3.55    0.59
  22  -1  -6    4.99    0.57
  22  -1  -6    3.90    0.57
 -22   1   7    0.38    0.14
 -22   1   7    0.16    0.14
  22  -1  -7    0.05    0.11
  22  -1  -7    0.37    0.12
 -22   1   8    6.93    0.88
 -22   1   8    6.10    0.90
  22  -1  -8    6.85    0.88
  22  -1  -8    6.42    0.89
 -22   1   9   -0.02    0.14
 -22   1   9   -0.09    0.17
  22  -1  -9    0.26    0.13
  22  -1  -9    0.36    0.14
 -22   1  10    3.70    0.67
  22  -1 -10    6.42    0.68
 -22   2   1    6.92    0.95
 -22   2   1    7.35    0.93
 -22   2   1    7.26    0.93
 -22   2   1    5.87    0.95
  22  -2  -1    7.77    0.94
  22  -2  -1    6.74    0.94
 -22   2   2    1.49    0.22
 -22   2   2    0.78    0.18
 -22   2   2    0.96    0.18
 -22   2   2    0.76    0.21
  22  -2  -2    0.58    0.18
  22  -2  -2    0.69    0.18
 -22   2   3    4.04    0.57
 -22   2   3    3.97    0.56
 -22   2   3    3.57    0.57
  22  -2  -3    4.25    0.55
  22  -2  -3    4.14    0.56
 -22   2   4    1.74    0.27
 -22   2   4    0.88    0.27
  22  -2  -4    1.96    0.27
 -22   2   5    1.49    0.22
 -22   2   5    0.99    0.21
 -22   2   5    0.95    0.22
  22  -2  -5    1.18    0.20
  22  -2  -5    0.58    0.19
 -22   2   6    0.48    0.15
 -22   2   6    0.18    0.16
  22  -2  -6    0.82    0.16
  22  -2  -6    0.72    0.15
 -22   2   7    0.01    0.12
 -22   2   7    0.03    0.13
  22  -2  -7    0.15    0.11
  22  -2  -7    0.07    0.12
 -22   2   8    0.70    0.16
 -22   2   8    0.49    0.18
  22  -2  -8    0.22    0.16
  22  -2  -8    0.90    0.16
 -22   2   9    0.07    0.12
 -22   2   9    0.14    0.16
  22  -2  -9    0.53    0.13
  22  -2  -9    0.29    0.13
 -22   2  10    0.12    0.14
  22  -2 -10    0.27    0.13
 -22   3   1    0.64    0.18
 -22   3   1    0.59    0.15
 -22   3   1    1.04    0.17
 -22   3   1    0.71    0.21
  22  -3  -1    0.51    0.17
  22  -3  -1    0.40    0.16
 -22   3   2    0.39    0.15
 -22   3   2    0.48    0.15
 -22   3   2    0.34    0.14
 -22   3   2    0.27    0.17
  22  -3  -2    0.43    0.15
  22  -3  -2    0.61    0.15
 -22   3   3    1.39    0.25
 -22   3   3    1.49    0.26
 -22   3   3    1.20    0.23
 -22   3   3    1.66    0.27
  22  -3  -3    1.43    0.24
  22  -3  -3    1.34    0.24
 -22   3   4   -0.08    0.14
 -22   3   4    0.29    0.15
  22  -3  -4    0.08    0.10
 -22   3   5    1.33    0.32
 -22   3   5    2.20    0.33
 -22   3   5    2.00    0.36
  22  -3  -5    2.91    0.34
  22  -3  -5    2.58    0.34
 -22   3   6    2.00    0.35
 -22   3   6    2.70    0.39
  22  -3  -6    2.83    0.36
  22  -3  -6    2.19    0.36
 -22   3   7    1.42    0.26
 -22   3   7    1.66    0.30
  22  -3  -7    1.75    0.26
  22  -3  -7    1.73    0.27
 -22   3   8    5.05    0.69
 -22   3   8    4.50    0.71
  22  -3  -8    5.81    0.69
  22  -3  -8    4.96    0.69
 -22   3   9    0.34    0.14
 -22   3   9    0.76    0.19
  22  -3  -9    0.49    0.15
  22  -3  -9    0.50    0.15
 -22   3  10    4.86    0.69
  22  -3 -10    5.29    0.69
 -22   4   1    6.31    0.77
 -22   4   1    5.81    0.75
 -22   4   1    5.38    0.74
 -22   4   1    5.76    0.78
  22  -4  -1    5.74    0.75
  22  -4  -1    4.72    0.75
 -22   4   2    0.05    0.12
 -22   4   2    0.13    0.14
 -22   4   2   -0.23    0.11
 -22   4   2    0.48    0.17
  22  -4  -2   -0.22    0.14
  22  -4  -2    0.08    0.12
 -22   4   3    4.50    0.64
 -22   4   3    3.87    0.63
 -22   4   3    4.47    0.62
 -22   4   3    4.49    0.66
  22  -4  -3    5.18    0.63
  22  -4  -3    5.35    0.64
 -22   4   4    0.57    0.16
 -22   4   4    0.60    0.17
 -22   4   4    0.48    0.19
  22  -4  -4    0.46    0.15
  22  -4  -4    0.34    0.14
 -22   4   5    2.87    0.40
 -22   4   5    2.07    0.38
 -22   4   5    2.36    0.41
  22  -4  -5    3.16    0.39
  22  -4  -5    3.18    0.40
 -22   4   6    0.81    0.16
 -22   4   6    0.57    0.19
  22  -4  -6    0.64    0.17
  22  -4  -6    0.81    0.16
 -22   4   7    0.32    0.14
 -22   4   7    0.55    0.18
  22  -4  -7    0.69    0.16
  22  -4  -7    0.78    0.16
 -22   4   8    0.96    0.22
 -22   4   8    1.13    0.24
  22  -4  -8    1.27    0.22
  22  -4  -8    1.38    0.22
 -22   4   9    0.12    0.14
 -22   4   9    0.38    0.18
  22  -4  -9   -0.01    0.13
  22  -4  -9   -0.13    0.13
 -22   4  10    0.34    0.15
  22  -4 -10    0.54    0.16
 -22   5   1    0.29    0.13
 -22   5   1    0.25    0.14
 -22   5   1    0.09    0.12
 -22   5   1    0.16    0.16
  22  -5  -1    0.07    0.14
  22  -5  -1   -0.08    0.11
 -22   5   2    0.54    0.15
 -22   5   2    0.44    0.16
 -22   5   2    0.21    0.13
 -22   5   2    0.24    0.15
  22  -5  -2    0.28    0.14
  22  -5  -2    0.55    0.15
 -22   5   3    0.44    0.17
 -22   5   3    0.51    0.15
 -22   5   3    0.34    0.17
  22  -5  -3    0.56    0.15
 -22   5   4    0.01    0.12
 -22   5   4    0.12    0.12
 -22   5   4    0.19    0.14
  22  -5  -4    0.00    0.12
  22  -5  -4    0.00    0.10
 -22   5   5    2.43    0.39
 -22   5   5    2.55    0.37
 -22   5   5    2.88    0.41
  22  -5  -5    3.01    0.38
  22  -5  -5    2.20    0.38
 -22   5   6    1.45    0.21
 -22   5   6    0.97    0.24
  22  -5  -6    0.94    0.21
  22  -5  -6    1.35    0.22
 -22   5   7    3.27    0.39
 -22   5   7    2.61    0.42
  22  -5  -7    2.29    0.39
  22  -5  -7    2.63    0.40
 -22   5   8    2.14    0.29
 -22   5   8    1.66    0.31
  22  -5  -8    1.85    0.29
  22  -5  -8    1.73    0.29
  22  -5  -9    1.70    0.26
  22  -5  -9    1.39    0.26
 -22   6   1    4.53    0.63
 -22   6   1    5.26    0.62
 -22   6   1    4.82    0.61
 -22   6   1    4.76    0.66
  22  -6  -1    3.85    0.61
  22  -6  -1    4.00    0.62
 -22   6   2    0.39    0.14
 -22   6   2    0.20    0.14
 -22   6   2    0.41    0.12
  22  -6  -2    0.60    0.17
  22  -6  -2    0.41    0.14
 -22   6   3    5.89    0.71
 -22   6   3    4.91    0.71
 -22   6   3    4.25    0.69
  22  -6  -3    6.34    0.72
 -22   6   4    0.12    0.14
 -22   6   4   -0.19    0.11
  22  -6  -4    0.49    0.15
  22  -6  -4    0.04    0.11
 -22   6   5    4.89    0.76
  22  -6  -5    6.71    0.78
  22  -6  -5    6.31    0.79
 -22   6   6    0.36    0.12
  22  -6  -6    0.22    0.14
  22  -6  -6    0.07    0.12
 -22   6   7    2.11    0.35
 -22   6   7    1.99    0.37
  22  -6  -7    2.43    0.36
  22  -6  -7    2.92    0.37
 -22   6   8    1.36    0.21
 -22   6   8    1.44    0.25
  22  -6  -8    1.10    0.22
  22  -6  -8    0.94    0.21
 -22   6   9    0.36    0.16
  22  -6  -9    0.58    0.16
 -22   7   1    0.18    0.12
 -22   7   1   -0.20    0.13
 -22   7   1    0.18    0.14
 -22   7   1    0.03    0.11
  22  -7  -1   -0.03    0.15
  22  -7  -1    0.07    0.12
 -22   7   2   -0.30    0.13
 -22   7   2   -0.01    0.14
 -22   7   2    0.10    0.11
  22  -7  -2   -0.07    0.12
 -22   7   3    0.18    0.14
 -22   7   3    0.26    0.16
 -22   7   3    0.26    0.17
  22  -7  -3    0.72    0.16
  22  -7  -3    0.42    0.13
 -22   7   4    0.10    0.16
 -22   7   4    0.00    0.14
 -22   7   4    0.35    0.15
  22  -7  -4    0.56    0.16
  22  -7  -4    0.00    0.13
 -22   7   5    2.59    0.34
 -22   7   5    2.40    0.37
  22  -7  -5    2.40    0.35
  22  -7  -5    1.75    0.33
 -22   7   6   -0.17    0.13
 -22   7   6    0.21    0.16
  22  -7  -6    0.19    0.15
  22  -7  -6   -0.21    0.11
 -22   7   7    3.53    0.44
 -22   7   7    2.69    0.46
  22  -7  -7    3.17    0.44
  22  -7  -7    2.88    0.45
 -22   7   8    0.05    0.15
 -22   7   8    0.08    0.16
  22  -7  -8    0.77    0.18
  22  -7  -8    0.04    0.12
 -22   8   1    3.15    0.42
 -22   8   1    2.21    0.42
 -22   8   1    3.02    0.41
  22  -8  -1    2.86    0.42
 -22   8   2    2.72    0.41
 -22   8   2    2.75    0.41
 -22   8   2    3.45    0.45
 -22   8   2    2.79    0.41
  22  -8  -2    2.67    0.41
  22  -8  -2    2.65    0.41
 -22   8   3    4.53    0.62
 -22   8   3    3.89    0.60
 -22   8   3    4.87    0.64
  22  -8  -3    4.33    0.61
  22  -8  -3    4.90    0.62
 -22   8   4    1.39    0.25
 -22   8   4    1.59    0.29
  22  -8  -4    1.34    0.25
  22  -8  -4    1.48    0.26
 -22   8   5    6.87    0.84
 -22   8   5    6.54    0.87
  22  -8  -5    5.66    0.83
  22  -8  -5    6.20    0.85
 -22   8   6    0.16    0.14
 -22   8   6   -0.41    0.15
  22  -8  -6   -0.01    0.13
  22  -8  -6    0.13    0.13
 -22   8   7    3.49    0.51
 -22   8   7    3.47    0.53
  22  -8  -7    3.97    0.52
  22  -8  -7    3.93    0.53
  22  -8  -8    0.18    0.15
 -22   9   1    0.25    0.13
 -22   9   1    0.13    0.16
 -22   9   1    0.11    0.16
 -22   9   1    0.27    0.14
  22  -9  -1    0.39    0.15
  22  -9  -1    0.08    0.13
 -22   9   2   -0.02    0.12
 -22   9   2    0.02    0.14
 -22   9   2    0.30    0.16
  22  -9  -2    0.10    0.14
  22  -9  -2    0.43    0.15
 -22   9   3    0.48    0.19
 -22   9   3    0.49    0.17
  22  -9  -3    0.74    0.19
  22  -9  -3    0.53    0.15
 -22   9   4    0.03    0.13
 -22   9   4   -0.11    0.12
  22  -9  -4   -0.21    0.15
  22  -9  -4    0.13    0.12
 -22   9   5    2.27    0.31
 -22   9   5    1.58    0.31
  22  -9  -5    2.21    0.31
  22  -9  -5    1.60    0.30
 -22   9   6    0.23    0.14
 -22   9   6    0.06    0.14
  22  -9  -6   -0.01    0.15
  22  -9  -6   -0.14    0.12
 -22   9   7    2.41    0.33
  22  -9  -7    2.36    0.33
  22  -9  -7    1.50    0.32
 -22  10   1    0.35    0.14
 -22  10   1    0.31    0.15
 -22  10   1    0.04    0.15
  22 -10  -1    0.30    0.18
  22 -10  -1    0.55    0.15
 -22  10   2    4.62    0.60
 -22  10   2    3.59    0.60
  22 -10  -2    4.61    0.61
  22 -10  -2    4.36    0.60
 -22  10   3    1.70    0.30
 -22  10   3    1.60    0.30
  22 -10  -3    1.89    0.30
  22 -10  -3    1.87    0.30
 -22  10   4    2.83    0.44
 -22  10   4    3.34    0.45
  22 -10  -4    3.11    0.45
  22 -10  -4    2.82    0.44
 -22  10   5    2.31    0.31
 -22  10   5    1.92    0.31
  22 -10  -5    1.63    0.31
  22 -10  -5    1.55    0.29
 -22  10   6    1.25    0.25
 -22  10   6    1.37    0.25
  22 -10  -6    1.14    0.25
  22 -10  -6    1.48    0.24
 -22  11   1    0.71    0.18
 -22  11   1    0.44    0.18
  22 -11  -1    0.73    0.21
  22 -11  -1    0.57    0.17
 -22  11   2    0.06    0.17
 -22  11   2   -0.08    0.14
  22 -11  -2    0.17    0.18
  22 -11  -2    0.06    0.13
 -22  11   3    1.11    0.21
 -22  11   3    1.13    0.22
  22 -11  -3    1.12    0.24
  22 -11  -3    0.68    0.20
 -22  11   4    0.14    0.17
 -22  11   4   -0.11    0.13
  22 -11  -4   -0.16    0.15
  22 -11  -4    0.07    0.12
 -22  11   5    1.67    0.29
 -22  11   5    1.38    0.28
  22 -11  -5    1.56    0.28
  22 -11  -5    1.88    0.28
 -22  12   1    0.03    0.18
 -22  12   1    0.12    0.15
  22 -12  -1    0.43    0.19
  22 -12  -1    0.28    0.15
 -22  12   2    5.38    0.74
 -22  12   2    5.71    0.74
  22 -12  -2    5.27    0.74
  22 -12  -2    5.02    0.74
 -22  12   3    0.19    0.18
 -22  12   3    0.50    0.16
  22 -12  -3    0.43    0.20
  22 -12  -3    0.47    0.16
 -22  12   4    2.77    0.53
 -22  12   4    5.25    0.56
  22 -12  -4    3.48    0.54
  22 -12  -4    3.92    0.54
 -22  13   1    0.28    0.19
 -22  13   1    0.38    0.16
  22 -13  -1    0.00    0.17
  22 -13  -1   -0.37    0.14
 -22  13   2   -0.16    0.17
 -22  13   2   -0.04    0.12
  22 -13  -2   -0.14    0.20
  22 -13  -2    0.08    0.14
 -22  14   1    0.53    0.20
  22 -14  -1    1.21    0.22
 -21 -10   1    0.08    0.19
  21  10  -1    0.20    0.14
 -21 -10   2    0.32    0.20
  21  10  -2    0.42    0.14
 -21 -10   3    0.11    0.16
  21  10  -3    0.12    0.14
 -21 -10   4    0.79    0.22
  21  10  -4    0.96    0.20
 -21  -9   1    2.06    0.34
  21   9  -1    2.01    0.30
 -21  -9   2    0.44    0.18
  21   9  -2    0.80    0.17
 -21  -9   3    0.48    0.18
  21   9  -3    0.81    0.17
 -21  -9   4    0.61    0.19
  21   9  -4    0.75    0.15
 -21  -9   5    0.26    0.15
  21   9  -5    0.13    0.13
 -21  -9   6    0.41    0.19
  21   9  -6    0.44    0.13
 -21  -8   1    0.59    0.17
 -21  -8   1    0.60    0.19
  21   8  -1    0.45    0.15
 -21  -8   2   -0.22    0.16
 -21  -8   2   -0.03    0.14
  21   8  -2   -0.01    0.12
  21   8  -3    1.28    0.21
 -21  -8   4    1.04    0.24
 -21  -8   5    0.81    0.21
  21   8  -5    1.19    0.19
 -21  -8   6    3.71    0.56
  21   8  -6    4.11    0.54
 -21  -8   7    0.68    0.18
  21   8  -7    0.49    0.14
 -21  -7   1    2.90    0.40
 -21  -7   1    1.73    0.38
  21   7  -1    2.73    0.36
  21   7  -1    2.61    0.37
 -21  -7   2    0.12    0.15
 -21  -7   2   -0.01    0.15
 -21  -7   2    0.10    0.17
  21   7  -2    0.22    0.11
 -21  -7   3    0.97    0.25
 -21  -7   3    1.21    0.25
 -21  -7   3    1.17    0.26
  21   7  -3    1.51    0.21
  21   7  -3    1.14    0.21
 -21  -7   4    1.13    0.24
 -21  -7   4    0.91    0.22
 -21  -7   4    0.66    0.23
  21   7  -4    1.18    0.18
  21   7  -4    0.83    0.18
 -21  -7   5    0.55    0.18
  21   7  -5    0.79    0.15
 -21  -7   6    0.62    0.19
  21   7  -6    1.10    0.18
 -21  -7   7   -0.03    0.14
  21   7  -7    0.19    0.10
 -21  -7   8    0.08    0.14
  21   7  -8    0.03    0.10
 -21  -7   9    0.29    0.16
  21   7  -9    0.22    0.11
 -21  -6   1    1.07    0.21
 -21  -6   1    0.46    0.20
 -21  -6   1    0.69    0.20
  21   6  -1    0.84    0.15
  21   6  -1    0.71    0.16
 -21  -6   2    0.10    0.13
 -21  -6   2    0.01    0.14
 -21  -6   2    0.18    0.16
  21   6  -2    0.28    0.12
  21   6  -2    0.36    0.12
 -21  -6   3    1.97    0.33
 -21  -6   3    2.15    0.36
  21   6  -3    2.22    0.32
 -21  -6   4    0.58    0.17
 -21  -6   4    0.20    0.16
 -21  -6   4    0.63    0.18
  21   6  -4    0.66    0.13
  21   6  -4    0.32    0.13
 -21  -6   5    3.00    0.52
 -21  -6   5    3.13    0.50
 -21  -6   5    4.00    0.54
  21   6  -5    4.18    0.50
  21   6  -5    3.77    0.51
 -21  -6   6    2.33    0.36
 -21  -6   6    1.74    0.36
  21   6  -6    2.63    0.34
  21   6  -6    2.34    0.34
 -21  -6   7    1.89    0.29
 -21  -6   7    1.76    0.30
  21   6  -7    1.68    0.26
  21   6  -7    1.62    0.27
 -21  -6   8    3.71    0.53
  21   6  -8    3.86    0.51
 -21  -6   9    0.09    0.14
  21   6  -9    0.24    0.11
 -21  -6  10    3.11    0.47
  21   6 -10    3.36    0.45
 -21  -5   1    2.34    0.39
 -21  -5   1    1.71    0.37
 -21  -5   1    2.62    0.41
  21   5  -1    3.25    0.36
  21   5  -1    2.42    0.37
 -21  -5   2    0.35    0.16
 -21  -5   2    0.05    0.17
 -21  -5   2   -0.39    0.13
  21   5  -2    0.01    0.09
  21   5  -2    0.04    0.09
 -21  -5   3    2.96    0.41
 -21  -5   3    2.59    0.39
 -21  -5   3    2.47    0.41
  21   5  -3    3.01    0.37
  21   5  -3    2.16    0.37
 -21  -5   4    0.79    0.17
 -21  -5   4    0.68    0.18
  21   5  -4    0.17    0.12
 -21  -5   5    1.23    0.27
 -21  -5   5    1.50    0.27
 -21  -5   5    1.56    0.29
  21   5  -5    1.86    0.25
  21   5  -5    1.77    0.26
 -21  -5   6    0.45    0.16
 -21  -5   6    0.25    0.16
 -21  -5   6    0.06    0.17
  21   5  -6    0.66    0.12
  21   5  -6    0.50    0.12
 -21  -5   7    0.31    0.14
 -21  -5   7    0.38    0.15
  21   5  -7    0.01    0.11
  21   5  -7    0.00    0.10
 -21  -5   8   -0.09    0.14
 -21  -5   8   -0.35    0.17
  21   5  -8    0.08    0.10
  21   5  -8    0.31    0.12
 -21  -5   9    0.10    0.14
 -21  -5   9   -0.02    0.15
  21   5  -9    0.23    0.10
  21   5  -9    0.20    0.12
 -21  -5  10    0.06    0.14
  21   5 -10    0.16    0.10
  21   5 -11    0.37    0.13
 -21  -4   1    0.46    0.16
 -21  -4   1    0.76    0.19
 -21  -4   1    1.30    0.22
 -21  -4   1    0.54    0.20
  21   4  -1    0.66    0.13
  21   4  -1    0.41    0.14
 -21  -4   2    0.28    0.16
 -21  -4   2    0.21    0.14
 -21  -4   2    0.75    0.18
 -21  -4   2    0.18    0.16
  21   4  -2    0.20    0.12
  21   4  -2    0.20    0.10
 -21  -4   3    1.81    0.32
 -21  -4   3    2.05    0.33
 -21  -4   3    2.10    0.34
  21   4  -3    2.13    0.30
  21   4  -3    2.18    0.31
 -21  -4   4    0.06    0.14
 -21  -4   4    0.22    0.16
 -21  -4   4    0.24    0.15
  21   4  -4    0.08    0.10
  21   4  -4    0.17    0.10
 -21  -4   5    2.97    0.47
 -21  -4   5    3.20    0.49
  21   4  -5    3.60    0.46
 -21  -4   6    0.57    0.16
 -21  -4   6    0.66    0.16
 -21  -4   6    0.67    0.18
  21   4  -6    0.44    0.13
  21   4  -6    0.03    0.11
 -21  -4   7    3.18    0.46
 -21  -4   7    2.57    0.43
 -21  -4   7    2.96    0.46
  21   4  -7    3.21    0.42
  21   4  -7    3.35    0.44
 -21  -4   8    0.78    0.20
 -21  -4   8    1.14    0.21
  21   4  -8    0.96    0.16
  21   4  -8    0.59    0.17
 -21  -4   9    1.43    0.31
 -21  -4   9    2.42    0.35
  21   4  -9    1.94    0.29
  21   4  -9    2.22    0.31
 -21  -4  10    2.93    0.41
 -21  -4  10    2.11    0.42
  21   4 -10    3.02    0.38
  21   4 -10    2.68    0.40
  21   4 -11    1.17    0.19
 -21  -3   1    2.22    0.34
 -21  -3   1    1.78    0.33
 -21  -3   1    2.38    0.34
 -21  -3   1    1.77    0.35
  21   3  -1    2.62    0.32
  21   3  -1    1.86    0.32
 -21  -3   2    0.16    0.13
 -21  -3   2    0.22    0.16
 -21  -3   2    0.31    0.16
 -21  -3   2    0.71    0.18
  21   3  -2    0.31    0.11
  21   3  -2    0.31    0.13
 -21  -3   3    2.66    0.46
 -21  -3   3    3.55    0.47
 -21  -3   3    3.02    0.46
 -21  -3   3    2.88    0.47
  21   3  -3    3.64    0.44
  21   3  -3    3.21    0.45
 -21  -3   4   -0.05    0.15
 -21  -3   4    0.15    0.16
 -21  -3   4    0.01    0.15
 -21  -3   4   -0.12    0.13
  21   3  -4   -0.10    0.11
  21   3  -4   -0.10    0.10
 -21  -3   5    2.42    0.39
 -21  -3   5    2.04    0.37
 -21  -3   5    2.18    0.38
  21   3  -5    2.99    0.36
  21   3  -5    2.57    0.37
 -21  -3   6    0.32    0.15
 -21  -3   6   -0.10    0.13
  21   3  -6    0.24    0.10
 -21  -3   7    1.09    0.20
 -21  -3   7    0.35    0.16
 -21  -3   7    0.54    0.18
  21   3  -7    0.70    0.15
  21   3  -7    0.81    0.16
 -21  -3   8    0.41    0.16
 -21  -3   8    0.34    0.14
 -21  -3   8    0.55    0.17
  21   3  -8    0.17    0.12
  21   3  -8    0.60    0.13
 -21  -3   9    0.05    0.13
 -21  -3   9    0.24    0.15
  21   3  -9    0.19    0.10
  21   3  -9    0.14    0.11
 -21  -3  10    0.30    0.15
 -21  -3  10    0.12    0.15
  21   3 -10    0.46    0.12
  21   3 -10    0.25    0.13
 -21  -3  11    0.31    0.14
 -21  -3  11   -0.07    0.16
  21   3 -11    0.27    0.12
  21   3 -11    0.18    0.12
 -21  -3  12   -0.16    0.14
  21   3 -12   -0.08    0.11
 -21  -2   1    0.55    0.17
 -21  -2   1    0.59    0.19
  21   2  -1    1.16    0.17
 -21  -2   2   -0.09    0.15
 -21  -2   2    0.14    0.14
 -21  -2   2    0.26    0.14
  21   2  -2    0.11    0.10
 -21  -2   3    1.63    0.28
 -21  -2   3    1.56    0.26
  21   2  -3    1.65    0.25
  21   2  -3    1.45    0.26
 -21  -2   4    0.27    0.13
 -21  -2   4    0.14    0.13
 -21  -2   4    0.23    0.13
 -21  -2   4    0.19    0.16
  21   2  -4   -0.01    0.11
  21   2  -4   -0.03    0.09
 -21  -2   5    1.29    0.26
 -21  -2   5    1.66    0.25
 -21  -2   5    1.73    0.26
 -21  -2   5    0.99    0.27
  21   2  -5    1.84    0.24
  21   2  -5    1.30    0.24
 -21  -2   6   -0.02    0.12
 -21  -2   6    0.00    0.16
 -21  -2   6   -0.24    0.16
 -21  -2   6   -0.08    0.13
  21   2  -6   -0.04    0.09
  21   2  -6    0.05    0.10
 -21  -2   7    3.23    0.46
 -21  -2   7    2.25    0.44
 -21  -2   7    3.11    0.47
  21   2  -7    4.24    0.46
 -21  -2   8    0.30    0.15
 -21  -2   8    0.68    0.15
 -21  -2   8    0.06    0.16
  21   2  -8    0.46    0.11
  21   2  -8    0.26    0.12
 -21  -2   9    4.66    0.69
 -21  -2   9    4.63    0.71
  21   2  -9    5.58    0.68
  21   2  -9    5.25    0.69
 -21  -2  10    2.57    0.39
 -21  -2  10    1.76    0.39
  21   2 -10    2.95    0.36
  21   2 -10    2.69    0.38
 -21  -2  11    3.18    0.46
 -21  -2  11    2.64    0.48
  21   2 -11    3.11    0.44
  21   2 -11    3.94    0.47
 -21  -2  12    4.34    0.62
 -21  -2  12    3.95    0.65
  21   2 -12    4.92    0.61
  21   2 -12    4.52    0.62
 -21  -1   1    0.75    0.22
 -21  -1   1    1.22    0.22
 -21  -1   1    0.96    0.25
  21   1  -1    1.48    0.21
  21   1  -1    1.20    0.21
 -21  -1   2    0.79    0.20
 -21  -1   2    0.84    0.20
 -21  -1   2    0.96    0.20
 -21  -1   2    0.33    0.21
  21   1  -2    0.89    0.16
  21   1  -2    1.10    0.18
 -21  -1   3    3.13    0.44
 -21  -1   3    2.74    0.42
 -21  -1   3    2.72    0.42
  21   1  -3    3.60    0.42
  21   1  -3    2.60    0.43
 -21  -1   4    0.52    0.15
 -21  -1   4    0.54    0.15
 -21  -1   4    0.16    0.15
  21   1  -4    0.49    0.13
 -21  -1   5    3.73    0.50
 -21  -1   5    3.30    0.49
 -21  -1   5    3.47    0.49
 -21  -1   5    2.39    0.51
  21   1  -5    4.35    0.49
  21   1  -5    3.55    0.49
 -21  -1   6    0.72    0.16
 -21  -1   6    0.27    0.15
 -21  -1   6    0.28    0.15
 -21  -1   6    0.32    0.15
  21   1  -6    0.10    0.12
  21   1  -6    0.07    0.11
 -21  -1   7    1.40    0.26
 -21  -1   7    1.08    0.22
 -21  -1   7    1.31    0.25
  21   1  -7    1.56    0.23
 -21  -1   8   -0.06    0.13
 -21  -1   8   -0.11    0.14
 -21  -1   8   -0.19    0.14
  21   1  -8    0.22    0.10
  21   1  -8    0.01    0.10
 -21  -1   9    0.04    0.14
 -21  -1   9   -0.11    0.14
 -21  -1   9   -0.21    0.14
  21   1  -9   -0.12    0.11
  21   1  -9    0.17    0.10
 -21  -1  10   -0.10    0.14
 -21  -1  10   -0.21    0.14
  21   1 -10    0.03    0.10
  21   1 -10    0.13    0.10
 -21  -1  11   -0.21    0.13
 -21  -1  11   -0.21    0.16
  21   1 -11    0.05    0.11
 -21  -1  12    0.37    0.15
 -21  -1  12    0.20    0.19
  21   1 -12    0.46    0.13
  21   1 -12    0.53    0.15
 -21   0   1    0.67    0.18
 -21   0   1    0.86    0.18
 -21   0   1    0.77    0.17
 -21   0   1    0.30    0.19
  21   0  -1    0.63    0.16
  21   0  -1    0.75    0.17
 -21   0   2   -0.02    0.14
 -21   0   2   -0.22    0.15
 -21   0   2    0.21    0.14
  21   0  -2    0.29    0.11
  21   0  -2    0.42    0.12
 -21   0   3    1.48    0.27
 -21   0   3    1.70    0.26
 -21   0   3    1.46    0.25
 -21   0   3    1.07    0.29
  21   0  -3    1.65    0.25
  21   0  -3    1.69    0.26
 -21   0   4    0.14    0.15
 -21   0   4    0.44    0.14
 -21   0   4    0.60    0.14
 -21   0   4    0.54    0.19
  21   0  -4    0.30    0.13
  21   0  -4    0.08    0.12
 -21   0   5    3.80    0.53
 -21   0   5    3.32    0.51
 -21   0   5    3.54    0.51
  21   0  -5    4.30    0.51
 -21   0   6    0.18    0.14
 -21   0   6    0.14    0.15
 -21   0   6    0.00    0.14
 -21   0   6    0.38    0.16
  21   0  -6    0.83    0.13
  21   0  -6    0.34    0.13
 -21   0   7    6.41    0.94
 -21   0   7    5.59    0.93
 -21   0   7    8.24    0.94
 -21   0   7    7.89    0.98
  21   0  -7    7.15    0.93
  21   0  -7    7.83    0.95
 -21   0   8   -0.27    0.13
 -21   0   8    0.12    0.13
 -21   0   8    0.14    0.15
  21   0  -8    0.06    0.10
  21   0  -8    0.04    0.10
 -21   0   9    7.81    1.03
 -21   0   9    7.32    1.01
 -21   0   9    7.96    1.05
  21   0  -9    8.53    1.01
  21   0  -9    6.99    1.02
 -21   0  10    1.96    0.29
 -21   0  10    2.09    0.33
  21   0 -10    1.88    0.28
  21   0 -10    1.58    0.29
 -21   0  11    4.44    0.66
 -21   0  11    4.37    0.69
  21   0 -11    5.79    0.66
  21   0 -11    4.99    0.67
 -21   0  12    1.70    0.28
 -21   0  12    1.39    0.32
  21   0 -12    1.93    0.27
  21   0 -12    1.78    0.28
 -21   0  13    1.09    0.24
 -21   0  13    1.26    0.28
  21   0 -13    1.35    0.22
  21   0 -13    1.12    0.23
 -21   1   1    0.59    0.18
 -21   1   1    0.51    0.16
 -21   1   1    0.76    0.16
 -21   1   1    0.55    0.19
  21  -1  -1    0.69    0.14
  21  -1  -1    0.44    0.14
 -21   1   2    2.85    0.43
 -21   1   2    2.69    0.43
 -21   1   2    3.03    0.47
  21  -1  -2    2.93    0.43
  21  -1  -2    4.20    0.45
 -21   1   3    2.29    0.35
 -21   1   3    2.27    0.34
 -21   1   3    2.05    0.33
 -21   1   3    2.19    0.37
  21  -1  -3    2.63    0.34
  21  -1  -3    2.17    0.34
 -21   1   4    1.72    0.30
 -21   1   4    1.62    0.30
 -21   1   4    1.92    0.29
 -21   1   4    1.98    0.34
  21  -1  -4    2.07    0.29
  21  -1  -4    2.26    0.30
 -21   1   5    0.84    0.20
 -21   1   5    0.94    0.19
 -21   1   5    0.76    0.17
  21  -1  -5    0.87    0.16
  21  -1  -5    0.37    0.17
 -21   1   6    0.15    0.13
 -21   1   6    0.18    0.15
 -21   1   6    0.31    0.11
  21  -1  -6    0.28    0.12
 -21   1   7    0.38    0.15
 -21   1   7    0.25    0.14
 -21   1   7    0.13    0.12
 -21   1   7    0.12    0.15
  21  -1  -7   -0.02    0.10
  21  -1  -7    0.16    0.11
 -21   1   8    0.03    0.14
 -21   1   8    0.01    0.14
 -21   1   8   -0.02    0.11
 -21   1   8    0.24    0.15
  21  -1  -8   -0.04    0.10
  21  -1  -8   -0.09    0.10
 -21   1   9    0.32    0.17
  21  -1  -9   -0.16    0.12
  21  -1  -9   -0.28    0.10
 -21   1  10    0.05    0.14
 -21   1  10    0.16    0.14
  21  -1 -10   -0.27    0.12
  21  -1 -10   -0.13    0.11
 -21   1  11   -0.06    0.14
 -21   1  11    0.19    0.15
  21  -1 -11    0.25    0.13
  21  -1 -11    0.19    0.11
 -21   1  12    0.44    0.15
 -21   1  12    0.31    0.16
  21  -1 -12    0.01    0.11
  21  -1 -12    0.37    0.13
 -21   1  13    0.64    0.19
 -21   1  13    0.63    0.20
  21  -1 -13    0.48    0.17
  21  -1 -13    0.70    0.17
 -21   2   1    0.21    0.13
 -21   2   1    0.28    0.12
 -21   2   1    0.22    0.12
 -21   2   1    0.14    0.18
  21  -2  -1    0.05    0.11
  21  -2  -1    0.30    0.13
 -21   2   2    2.25    0.33
 -21   2   2    2.16    0.33
 -21   2   2    2.48    0.38
  21  -2  -2    2.26    0.34
  21  -2  -2    2.44    0.35
 -21   2   3    0.65    0.17
 -21   2   3    0.56    0.16
 -21   2   3    0.74    0.15
 -21   2   3    0.60    0.20
  21  -2  -3    0.43    0.14
  21  -2  -3    0.68    0.16
 -21   2   4    3.03    0.49
 -21   2   4    3.47    0.48
 -21   2   4    3.43    0.47
 -21   2   4    3.13    0.51
  21  -2  -4    3.80    0.48
  21  -2  -4    4.03    0.50
 -21   2   5    2.79    0.42
 -21   2   5    3.35    0.42
 -21   2   5    2.87    0.41
 -21   2   5    2.50    0.44
  21  -2  -5    3.39    0.42
  21  -2  -5    2.52    0.41
 -21   2   6    2.67    0.38
 -21   2   6    2.24    0.37
 -21   2   6    2.64    0.37
  21  -2  -6    2.75    0.37
 -21   2   7    6.46    0.93
 -21   2   7    7.01    0.93
 -21   2   7    7.23    0.92
 -21   2   7    7.19    0.96
  21  -2  -7    7.39    0.92
  21  -2  -7    6.66    0.93
 -21   2   8    0.71    0.18
 -21   2   8    0.65    0.18
 -21   2   8    0.95    0.17
 -21   2   8    0.71    0.20
  21  -2  -8    0.43    0.16
  21  -2  -8    0.96    0.17
 -21   2   9    8.68    1.06
 -21   2   9    8.23    1.04
 -21   2   9    6.77    1.06
  21  -2  -9    7.87    1.03
  21  -2  -9    7.74    1.05
 -21   2  10    0.04    0.14
 -21   2  10    0.05    0.17
  21  -2 -10    0.16    0.12
 -21   2  11    7.42    0.90
 -21   2  11    6.28    0.92
  21  -2 -11    6.85    0.89
  21  -2 -11    6.40    0.90
 -21   2  12    0.52    0.15
 -21   2  12    0.57    0.17
  21  -2 -12    0.21    0.12
  21  -2 -12    0.22    0.12
 -21   2  13    3.67    0.51
 -21   2  13    4.13    0.55
  21  -2 -13    3.25    0.50
  21  -2 -13    3.68    0.51
 -21   3   1   -0.08    0.14
 -21   3   1    0.35    0.14
 -21   3   1    0.34    0.12
 -21   3   1    0.27    0.15
  21  -3  -1    0.41    0.14
  21  -3  -1    0.20    0.13
 -21   3   2    7.70    0.87
 -21   3   2    5.31    0.84
 -21   3   2    6.81    0.89
  21  -3  -2    6.49    0.86
  21  -3  -2    7.15    0.87
 -21   3   3    0.41    0.16
 -21   3   3    0.25    0.12
 -21   3   3    0.25    0.12
 -21   3   3    0.39    0.16
  21  -3  -3    0.23    0.14
  21  -3  -3    0.46    0.12
 -21   3   4    3.44    0.50
 -21   3   4    3.09    0.48
 -21   3   4    3.59    0.48
 -21   3   4    3.56    0.52
  21  -3  -4    3.78    0.49
  21  -3  -4    3.75    0.50
 -21   3   5    0.63    0.17
 -21   3   5    0.49    0.14
 -21   3   5    0.38    0.13
 -21   3   5    0.12    0.18
  21  -3  -5    0.56    0.13
  21  -3  -5    0.48    0.14
 -21   3   6    1.12    0.21
 -21   3   6    1.06    0.19
 -21   3   6    0.79    0.19
  21  -3  -6    1.10    0.19
 -21   3   7    0.28    0.15
 -21   3   7    0.39    0.15
 -21   3   7    0.55    0.15
 -21   3   7    0.71    0.18
  21  -3  -7    0.58    0.14
  21  -3  -7    0.53    0.14
 -21   3   8    0.03    0.12
 -21   3   8   -0.10    0.12
 -21   3   8   -0.16    0.11
 -21   3   8   -0.10    0.13
  21  -3  -8    0.04    0.12
  21  -3  -8   -0.04    0.10
 -21   3   9    0.64    0.18
 -21   3   9    0.48    0.14
 -21   3   9    0.39    0.18
  21  -3  -9    0.33    0.13
  21  -3  -9    0.64    0.15
 -21   3  10    0.24    0.12
 -21   3  10    0.27    0.14
  21  -3 -10   -0.12    0.11
  21  -3 -10    0.16    0.11
 -21   3  11    0.29    0.13
 -21   3  11    0.31    0.17
  21  -3 -11    0.53    0.13
  21  -3 -11    0.18    0.12
 -21   3  12    0.18    0.13
 -21   3  12    0.36    0.18
  21  -3 -12    0.48    0.14
  21  -3 -12    0.32    0.14
 -21   3  13    1.86    0.31
 -21   3  13    1.77    0.36
  21  -3 -13    2.34    0.31
  21  -3 -13    1.91    0.32
 -21   4   1   -0.09    0.12
 -21   4   1   -0.02    0.13
 -21   4   1    0.38    0.11
 -21   4   1    0.46    0.17
  21  -4  -1    0.29    0.12
  21  -4  -1   -0.09    0.11
 -21   4   2    0.97    0.19
 -21   4   2    1.12    0.20
 -21   4   2    1.00    0.24
  21  -4  -2    1.43    0.21
  21  -4  -2    1.11    0.21
 -21   4   3    0.08    0.12
 -21   4   3   -0.02    0.12
 -21   4   3    0.03    0.12
 -21   4   3    0.42    0.16
  21  -4  -3    0.13    0.11
  21  -4  -3   -0.06    0.10
 -21   4   4    2.90    0.48
 -21   4   4    3.47    0.47
 -21   4   4    3.70    0.47
 -21   4   4    3.24    0.51
  21  -4  -4    3.24    0.47
  21  -4  -4    3.76    0.49
 -21   4   5    1.03    0.18
 -21   4   5    0.81    0.14
 -21   4   5    0.41    0.14
 -21   4   5    0.47    0.18
  21  -4  -5    0.18    0.15
  21  -4  -5    0.54    0.15
 -21   4   6    6.93    0.93
 -21   4   6    7.32    0.93
 -21   4   6    6.59    0.92
  21  -4  -6    7.32    0.93
 -21   4   7    2.49    0.35
 -21   4   7    2.15    0.32
 -21   4   7    2.79    0.37
  21  -4  -7    1.78    0.33
  21  -4  -7    1.97    0.33
 -21   4   8    4.00    0.51
 -21   4   8    3.43    0.54
  21  -4  -8    3.43    0.51
  21  -4  -8    3.73    0.52
 -21   4   9    3.25    0.49
 -21   4   9    3.46    0.47
 -21   4   9    3.36    0.51
  21  -4  -9    4.21    0.48
  21  -4  -9    2.75    0.47
 -21   4  10    1.76    0.26
 -21   4  10    2.24    0.32
  21  -4 -10    1.32    0.26
  21  -4 -10    1.75    0.28
 -21   4  11    6.36    0.79
 -21   4  11    5.37    0.82
  21  -4 -11    5.73    0.78
  21  -4 -11    5.99    0.80
 -21   4  12    0.08    0.15
  21  -4 -12    0.41    0.15
  21  -4 -12    0.09    0.11
 -21   4  13    3.95    0.56
 -21   5   1    0.84    0.18
 -21   5   1    0.65    0.18
 -21   5   1    0.56    0.20
  21  -5  -1    1.56    0.20
  21  -5  -1    1.08    0.19
 -21   5   2    4.46    0.70
 -21   5   2    5.72    0.70
 -21   5   2    4.76    0.69
 -21   5   2    5.33    0.73
  21  -5  -2    5.30    0.70
  21  -5  -2    6.07    0.72
 -21   5   3    0.33    0.12
 -21   5   3    0.24    0.12
 -21   5   3    0.42    0.11
 -21   5   3    0.29    0.15
  21  -5  -3    0.32    0.12
  21  -5  -3    0.41    0.13
 -21   5   4    3.49    0.56
 -21   5   4    4.15    0.56
 -21   5   4    4.09    0.55
 -21   5   4    3.65    0.59
  21  -5  -4    4.64    0.56
  21  -5  -4    4.29    0.57
 -21   5   5    0.13    0.13
 -21   5   5    0.15    0.12
 -21   5   5   -0.05    0.11
 -21   5   5    0.04    0.15
  21  -5  -5   -0.03    0.11
  21  -5  -5    0.04    0.11
 -21   5   6    1.97    0.34
 -21   5   6    2.13    0.31
 -21   5   6    2.07    0.33
  21  -5  -6    2.32    0.32
 -21   5   7    0.39    0.17
 -21   5   7    0.81    0.17
 -21   5   7    0.63    0.18
  21  -5  -7    0.88    0.17
 -21   5   8    0.37    0.13
 -21   5   8    0.54    0.14
 -21   5   8    0.68    0.16
 -21   5   8    0.49    0.16
  21  -5  -8    0.58    0.14
  21  -5  -8    0.34    0.14
 -21   5   9    0.72    0.21
 -21   5   9    0.86    0.18
 -21   5   9    1.15    0.22
  21  -5  -9    0.74    0.19
 -21   5  10    0.07    0.13
  21  -5 -10    0.20    0.14
  21  -5 -10    0.07    0.11
 -21   5  11    0.25    0.14
 -21   5  11    0.24    0.15
  21  -5 -11    0.08    0.14
  21  -5 -11    0.25    0.13
 -21   5  12    0.93    0.22
 -21   5  12    1.75    0.27
  21  -5 -12    1.28    0.22
  21  -5 -12    1.32    0.24
 -21   6   1    0.81    0.18
 -21   6   1    0.56    0.17
 -21   6   1    0.89    0.20
  21  -6  -1    0.76    0.17
  21  -6  -1    1.18    0.20
 -21   6   2    0.56    0.16
 -21   6   2    0.45    0.13
 -21   6   2    0.58    0.14
 -21   6   2    0.52    0.18
  21  -6  -2    0.12    0.14
  21  -6  -2    0.02    0.14
 -21   6   3    0.02    0.13
 -21   6   3    0.27    0.13
 -21   6   3    0.39    0.13
 -21   6   3    0.29    0.15
  21  -6  -3    0.16    0.14
  21  -6  -3    0.12    0.12
 -21   6   4    1.89    0.31
 -21   6   4    2.04    0.29
 -21   6   4    2.10    0.30
 -21   6   4    1.83    0.33
  21  -6  -4    2.06    0.31
  21  -6  -4    1.87    0.31
 -21   6   5    0.03    0.14
 -21   6   5    0.02    0.11
 -21   6   5    0.20    0.11
  21  -6  -5    0.21    0.13
  21  -6  -5   -0.09    0.11
 -21   6   6    4.45    0.62
 -21   6   6    4.36    0.61
 -21   6   6    4.44    0.61
  21  -6  -6    4.82    0.62
 -21   6   7    0.21    0.14
 -21   6   7    0.10    0.14
 -21   6   7    0.43    0.12
  21  -6  -7    0.30    0.13
  21  -6  -7    0.01    0.12
 -21   6   8    3.19    0.46
 -21   6   8    3.83    0.45
 -21   6   8    2.80    0.46
 -21   6   8    2.24    0.45
  21  -6  -8    3.79    0.45
  21  -6  -8    2.99    0.45
 -21   6   9    0.96    0.17
 -21   6   9    0.64    0.21
  21  -6  -9    1.24    0.19
  21  -6  -9    0.55    0.18
 -21   6  10    4.06    0.51
 -21   6  10    3.83    0.55
  21  -6 -10    3.62    0.51
  21  -6 -10    3.24    0.52
 -21   6  11    3.05    0.48
 -21   6  11    3.27    0.53
  21  -6 -11    3.94    0.49
  21  -6 -11    3.85    0.51
 -21   6  12    0.63    0.18
 -21   6  12    0.84    0.24
  21  -6 -12    0.94    0.19
  21  -6 -12    1.32    0.21
 -21   7   1    2.93    0.51
 -21   7   1    3.57    0.50
  21  -7  -1    3.95    0.51
  21  -7  -1    3.89    0.52
 -21   7   2    2.96    0.41
 -21   7   2    2.54    0.40
 -21   7   2    3.07    0.43
 -21   7   2    2.52    0.40
  21  -7  -2    2.85    0.41
  21  -7  -2    3.05    0.42
 -21   7   3    1.95    0.35
 -21   7   3    2.35    0.34
 -21   7   3    3.13    0.38
 -21   7   3    2.25    0.34
  21  -7  -3    2.28    0.35
  21  -7  -3    2.48    0.36
 -21   7   4    3.94    0.51
 -21   7   4    3.37    0.50
 -21   7   4    4.44    0.55
 -21   7   4    3.18    0.49
  21  -7  -4    3.23    0.50
  21  -7  -4    4.23    0.52
 -21   7   5    0.98    0.19
 -21   7   5    0.85    0.18
 -21   7   5    0.90    0.17
  21  -7  -5    0.65    0.17
 -21   7   6    2.99    0.40
 -21   7   6    2.51    0.41
 -21   7   6    2.25    0.38
  21  -7  -6    3.10    0.41
 -21   7   7    0.62    0.18
 -21   7   7    0.49    0.15
 -21   7   7    0.80    0.19
 -21   7   7    0.71    0.16
  21  -7  -7    0.58    0.18
 -21   7   8    0.77    0.24
 -21   7   8    1.29    0.22
 -21   7   8    1.43    0.26
  21  -7  -8    1.01    0.21
  21  -7  -8    1.60    0.24
 -21   7   9    0.77    0.18
 -21   7   9    0.87    0.22
  21  -7  -9    0.93    0.19
  21  -7  -9    0.84    0.18
 -21   7  10    0.28    0.14
 -21   7  10   -0.14    0.14
  21  -7 -10    0.04    0.13
  21  -7 -10   -0.02    0.13
 -21   7  11   -0.15    0.14
 -21   7  11    0.16    0.17
  21  -7 -11    0.23    0.14
  21  -7 -11    0.12    0.13
 -21   8   1    0.59    0.15
 -21   8   1    0.30    0.16
 -21   8   1    0.52    0.18
 -21   8   1    0.42    0.15
  21  -8  -1    0.79    0.16
  21  -8  -1    0.83    0.18
 -21   8   2   -0.08    0.12
 -21   8   2    0.17    0.12
 -21   8   2   -0.24    0.13
 -21   8   2    0.09    0.12
  21  -8  -2    0.17    0.15
  21  -8  -2    0.19    0.12
 -21   8   3    0.06    0.12
 -21   8   3    0.09    0.14
 -21   8   3   -0.23    0.13
 -21   8   3   -0.11    0.11
  21  -8  -3   -0.21    0.14
  21  -8  -3   -0.01    0.11
 -21   8   4    1.57    0.24
 -21   8   4    1.83    0.26
 -21   8   4    1.00    0.28
 -21   8   4    1.08    0.23
  21  -8  -4    1.83    0.26
  21  -8  -4    1.38    0.26
 -21   8   5    0.07    0.13
 -21   8   5    0.09    0.15
 -21   8   5    0.45    0.13
  21  -8  -5    0.31    0.14
 -21   8   6    2.82    0.42
 -21   8   6    3.57    0.43
 -21   8   6    3.01    0.44
 -21   8   6    2.21    0.41
  21  -8  -6    3.77    0.44
  21  -8  -6    2.56    0.42
 -21   8   7   -0.06    0.13
 -21   8   7    0.29    0.16
 -21   8   7    0.37    0.16
  21  -8  -7    0.31    0.14
 -21   8   8    4.95    0.65
 -21   8   8    4.76    0.67
  21  -8  -8    4.81    0.66
  21  -8  -8    4.80    0.67
 -21   8   9    0.91    0.18
 -21   8   9    0.81    0.21
  21  -8  -9    1.01    0.19
  21  -8  -9    0.73    0.18
 -21   8  10    7.58    1.01
 -21   8  10    7.42    1.03
  21  -8 -10    7.70    1.01
  21  -8 -10    7.91    1.03
 -21   8  11    2.80    0.39
 -21   8  11    2.61    0.41
  21  -8 -11    2.69    0.38
  21  -8 -11    2.08    0.38
 -21   9   1    5.92    0.81
 -21   9   1    5.22    0.81
 -21   9   1    6.24    0.84
 -21   9   1    6.49    0.82
  21  -9  -1    5.97    0.82
  21  -9  -1    7.47    0.85
 -21   9   2    1.53    0.21
 -21   9   2    1.43    0.22
 -21   9   2    0.94    0.22
 -21   9   2    0.48    0.19
  21  -9  -2    1.14    0.23
  21  -9  -2    1.08    0.21
 -21   9   3    5.19    0.72
 -21   9   3    4.76    0.72
 -21   9   3    5.79    0.74
 -21   9   3    5.30    0.72
  21  -9  -3    5.98    0.73
  21  -9  -3    5.47    0.74
 -21   9   4    2.52    0.37
 -21   9   4    2.44    0.36
 -21   9   5    1.47    0.26
 -21   9   5    1.44    0.26
 -21   9   5    1.50    0.27
 -21   9   5    1.80    0.26
  21  -9  -5    1.45    0.26
  21  -9  -5    1.60    0.27
 -21   9   6    2.17    0.31
 -21   9   6    1.84    0.30
 -21   9   6    1.45    0.31
  21  -9  -6    2.28    0.31
  21  -9  -6    2.19    0.32
 -21   9   7   -0.06    0.13
 -21   9   7    0.44    0.14
  21  -9  -7   -0.13    0.12
  21  -9  -7   -0.24    0.12
 -21   9   8    1.51    0.27
 -21   9   8    1.33    0.28
  21  -9  -8    2.02    0.28
 -21   9   9    0.10    0.15
 -21   9   9    0.00    0.15
  21  -9  -9   -0.01    0.15
  21  -9  -9   -0.20    0.12
 -21   9  10    0.00    0.13
 -21   9  10    0.17    0.15
  21  -9 -10    0.03    0.14
  21  -9 -10   -0.19    0.12
 -21  10   1    0.19    0.11
 -21  10   1    0.22    0.15
 -21  10   1    0.09    0.14
 -21  10   1    0.23    0.13
  21 -10  -1    0.04    0.14
  21 -10  -1    0.02    0.12
 -21  10   2    0.23    0.12
 -21  10   2    0.10    0.13
 -21  10   2   -0.05    0.15
 -21  10   2   -0.04    0.11
  21 -10  -2    0.31    0.17
  21 -10  -2    0.02    0.12
 -21  10   3   -0.12    0.11
 -21  10   3    0.30    0.11
 -21  10   4    2.01    0.33
 -21  10   4    2.37    0.35
 -21  10   4    2.41    0.36
 -21  10   4    2.29    0.34
  21 -10  -4    2.11    0.35
  21 -10  -4    2.42    0.36
 -21  10   5    1.39    0.22
 -21  10   5    1.35    0.22
 -21  10   5    1.23    0.23
 -21  10   5    0.98    0.21
  21 -10  -5    0.93    0.23
  21 -10  -5    0.94    0.21
 -21  10   6    4.00    0.49
 -21  10   6    2.57    0.49
  21 -10  -6    3.86    0.49
  21 -10  -6    3.20    0.49
 -21  10   7    0.67    0.19
 -21  10   7    0.64    0.18
  21 -10  -7    0.98    0.19
  21 -10  -7    0.65    0.18
 -21  10   8    7.09    0.83
 -21  10   8    5.37    0.83
  21 -10  -8    6.53    0.83
  21 -10  -8    5.75    0.84
 -21  10   9    0.12    0.14
 -21  10   9    0.13    0.15
  21 -10  -9    0.34    0.15
  21 -10  -9    0.17    0.14
 -21  11   1    7.74    1.06
 -21  11   1    8.80    1.08
 -21  11   1    7.75    1.07
 -21  11   1    7.75    1.06
  21 -11  -1    8.86    1.08
  21 -11  -1    7.62    1.07
 -21  11   2    0.20    0.13
 -21  11   2    0.41    0.13
 -21  11   3    6.31    0.92
 -21  11   3    6.38    0.92
 -21  11   3    6.41    0.93
 -21  11   3    7.50    0.92
  21 -11  -3    7.87    0.94
  21 -11  -3    7.44    0.94
 -21  11   4    0.42    0.15
 -21  11   4    0.47    0.15
 -21  11   4    0.48    0.16
 -21  11   4    0.70    0.14
  21 -11  -4    0.22    0.16
  21 -11  -4    0.66    0.17
 -21  11   5    1.38    0.27
 -21  11   5    1.54    0.28
  21 -11  -5    1.84    0.28
  21 -11  -5    1.71    0.28
 -21  11   6    0.38    0.17
 -21  11   6    0.73    0.18
  21 -11  -6    0.58    0.17
  21 -11  -6    0.75    0.17
 -21  11   7    0.35    0.15
 -21  11   7    0.35    0.15
  21 -11  -7   -0.01    0.17
  21 -11  -7    0.43    0.15
 -21  11   8    0.44    0.18
 -21  11   8    0.69    0.17
  21 -11  -8    0.20    0.17
  21 -11  -8    0.45    0.16
 -21  12   1   -0.04    0.10
 -21  12   1    0.12    0.18
 -21  12   1    0.15    0.12
  21 -12  -1   -0.32    0.15
 -21  12   2    0.18    0.13
 -21  12   2    0.45    0.16
 -21  12   2    0.28    0.13
 -21  12   2    0.28    0.12
  21 -12  -2    0.17    0.18
  21 -12  -2    0.09    0.15
 -21  12   3    1.18    0.26
 -21  12   3    2.00    0.28
 -21  12   3    1.93    0.28
 -21  12   3    0.90    0.25
  21 -12  -3    1.97    0.29
  21 -12  -3    1.72    0.28
 -21  12   4    0.89    0.18
 -21  12   4    0.62    0.18
  21 -12  -4    0.69    0.20
  21 -12  -4    0.41    0.17
 -21  12   5    5.93    0.72
 -21  12   5    5.05    0.72
  21 -12  -5    5.67    0.73
  21 -12  -5    4.48    0.72
 -21  12   6    1.15    0.23
  21 -12  -6    1.10    0.25
  21 -12  -6    1.18    0.23
 -21  12   7    2.34    0.35
 -21  12   7    1.88    0.34
  21 -12  -7    2.04    0.36
  21 -12  -7    2.47    0.35
 -21  13   1    7.85    1.02
 -21  13   1    7.77    1.03
 -21  13   1    7.14    1.03
 -21  13   1    7.46    1.02
  21 -13  -1    7.67    1.04
  21 -13  -1    8.56    1.05
 -21  13   2    0.60    0.18
 -21  13   2    0.40    0.15
  21 -13  -2    0.31    0.20
  21 -13  -2    0.29    0.18
 -21  13   3    6.86    0.91
 -21  13   3    6.82    0.92
  21 -13  -3    5.91    0.91
  21 -13  -3    8.06    0.94
 -21  13   4    0.23    0.17
 -21  13   4   -0.17    0.13
  21 -13  -4   -0.10    0.15
  21 -13  -4   -0.09    0.14
 -21  13   5    2.20    0.36
 -21  13   5    2.40    0.36
  21 -13  -5    1.85    0.36
  21 -13  -5    2.53    0.36
 -21  13   6    0.21    0.17
 -21  13   6    0.41    0.16
  21 -13  -6    0.42    0.17
  21 -13  -6    0.78    0.17
 -21  14   1   -0.06    0.18
 -21  14   1    0.25    0.16
  21 -14  -1    0.19    0.20
  21 -14  -1    0.34    0.16
 -21  14   2    0.08    0.17
 -21  14   2    0.23    0.14
  21 -14  -2    0.31    0.18
  21 -14  -2    0.31    0.16
 -21  14   3    1.77    0.29
 -21  14   3    1.60    0.28
  21 -14  -3    1.56    0.30
  21 -14  -3    1.24    0.27
 -21  14   4    0.13    0.17
 -21  14   4    0.39    0.16
  21 -14  -4    0.24    0.20
  21 -14  -4    0.31    0.17
 -21  14   5    4.11    0.57
  21 -14  -5    3.71    0.58
  21 -14  -5    3.88    0.56
 -21  15   1    3.71    0.47
 -21  15   1    3.48    0.46
  21 -15  -1    2.40    0.45
  21 -15  -1    2.58    0.44
 -21  15   2    1.35    0.30
 -21  15   2    1.53    0.29
  21 -15  -2    1.73    0.32
  21 -15  -2    2.22    0.31
 -21  15   3    2.72    0.46
 -21  15   3    3.51    0.47
  21 -15  -3    2.57    0.47
  21 -15  -3    3.51    0.47
 -21  16   1    0.39    0.16
  21 -16  -1    0.30    0.22
  21 -16  -1    0.13    0.15
 -21  16   2    0.16    0.14
  21 -16  -2    0.55    0.19
 -20 -12   1    1.13    0.26
  20  12  -1    1.59    0.25
 -20 -12   2    0.28    0.15
  20  12  -2    0.12    0.14
 -20 -12   3    0.83    0.19
  20  12  -3    0.61    0.18
 -20 -12   4   -0.03    0.16
  20  12  -4    0.15    0.14
 -20 -11   1    1.11    0.27
 -20 -11   1    0.93    0.24
  20  11  -1    1.20    0.20
 -20 -11   2    0.16    0.17
  20  11  -2    0.36    0.13
 -20 -11   3    1.59    0.25
  20  11  -3    1.11    0.23
 -20 -11   4   -0.15    0.16
  20  11  -4    0.17    0.11
 -20 -11   5    3.07    0.40
  20  11  -5    2.43    0.38
 -20 -11   6   -0.02    0.16
  20  11  -6    0.46    0.13
  20  11  -7    2.96    0.43
 -20 -10   1    0.82    0.23
 -20 -10   2    1.02    0.22
 -20 -10   2    0.92    0.19
  20  10  -2    0.34    0.16
 -20 -10   3    0.34    0.19
 -20 -10   3    0.53    0.16
  20  10  -3    0.74    0.16
 -20 -10   4    0.23    0.15
  20  10  -4    0.27    0.14
 -20 -10   5   -0.31    0.15
  20  10  -5    0.02    0.11
 -20 -10   6   -0.13    0.14
  20  10  -6    0.30    0.13
 -20 -10   7    0.09    0.14
  20  10  -7   -0.03    0.11
 -20 -10   8    0.30    0.15
  20  10  -8    0.03    0.11
 -20  -9   1    0.46    0.18
 -20  -9   1    0.23    0.14
 -20  -9   1    0.19    0.16
  20   9  -1    0.39    0.14
  20   9  -1    0.33    0.13
 -20  -9   2    1.13    0.26
  20   9  -2    1.48    0.22
  20   9  -2    1.22    0.23
 -20  -9   3    1.30    0.23
 -20  -9   3    1.10    0.25
  20   9  -3    1.13    0.20
 -20  -9   4    1.09    0.20
 -20  -9   4    0.85    0.18
 -20  -9   4    0.99    0.22
  20   9  -4    0.77    0.16
  20   9  -4    0.62    0.16
 -20  -9   5    3.62    0.60
 -20  -9   5    4.00    0.59
 -20  -9   5    4.70    0.63
  20   9  -5    4.56    0.59
  20   9  -5    4.64    0.59
 -20  -9   6    0.11    0.14
 -20  -9   6    0.13    0.18
  20   9  -6    0.23    0.11
  20   9  -6    0.32    0.14
 -20  -9   7    4.71    0.59
 -20  -9   7    3.09    0.61
  20   9  -7    5.15    0.58
  20   9  -7    3.68    0.58
 -20  -9   8   -0.31    0.15
  20   9  -8   -0.22    0.11
 -20  -9   9    3.84    0.56
  20   9  -9    4.15    0.55
 -20  -9  10    1.12    0.21
  20   9 -10    1.00    0.19
 -20  -8   1    0.12    0.16
 -20  -8   1    0.12    0.15
 -20  -8   1    0.22    0.17
  20   8  -1    0.11    0.11
  20   8  -1    0.23    0.13
 -20  -8   2    1.54    0.26
 -20  -8   2    1.26    0.24
 -20  -8   2    1.10    0.26
  20   8  -2    1.32    0.21
  20   8  -2    1.20    0.22
 -20  -8   3    0.49    0.16
 -20  -8   3    0.18    0.15
 -20  -8   3   -0.15    0.15
  20   8  -3    0.09    0.11
  20   8  -3    0.32    0.10
 -20  -8   4    0.82    0.19
 -20  -8   4    0.46    0.16
 -20  -8   4    0.27    0.16
  20   8  -4    0.30    0.11
  20   8  -4    0.24    0.11
 -20  -8   5    0.58    0.18
 -20  -8   5    0.15    0.16
 -20  -8   5    0.10    0.17
  20   8  -5    0.63    0.13
 -20  -8   6   -0.14    0.13
 -20  -8   6    0.20    0.13
 -20  -8   6    0.40    0.16
  20   8  -6    0.23    0.11
  20   8  -6   -0.21    0.10
 -20  -8   7   -0.23    0.15
 -20  -8   7   -0.11    0.15
 -20  -8   7    0.05    0.17
  20   8  -7    0.28    0.12
  20   8  -7   -0.06    0.10
 -20  -8   8    0.10    0.14
 -20  -8   8   -0.18    0.16
  20   8  -8    0.13    0.12
  20   8  -8   -0.17    0.10
 -20  -8   9    0.40    0.15
 -20  -8   9    0.20    0.17
  20   8  -9    0.01    0.11
  20   8  -9    0.00    0.10
 -20  -8  10   -0.28    0.14
 -20  -8  10   -0.08    0.17
  20   8 -10    0.02    0.11
  20   8 -10    0.17    0.12
 -20  -8  11    1.06    0.22
  20   8 -11    1.08    0.19
 -20  -7   1    0.18    0.15
 -20  -7   1    0.12    0.16
 -20  -7   1    0.14    0.18
 -20  -7   1    0.59    0.19
  20   7  -1   -0.23    0.11
  20   7  -1    0.20    0.10
 -20  -7   2    2.12    0.32
 -20  -7   2    1.82    0.31
 -20  -7   2    2.21    0.35
  20   7  -2    2.07    0.30
  20   7  -2    1.97    0.31
 -20  -7   3    0.40    0.17
 -20  -7   3    0.11    0.14
 -20  -7   3    0.51    0.16
  20   7  -3    0.05    0.12
  20   7  -3    0.12    0.10
 -20  -7   4    3.41    0.54
  20   7  -4    3.94    0.50
  20   7  -4    3.54    0.50
 -20  -7   5    3.25    0.45
 -20  -7   5    2.91    0.44
 -20  -7   5    3.03    0.47
  20   7  -5    3.39    0.44
  20   7  -5    2.97    0.44
 -20  -7   6    2.06    0.40
 -20  -7   6    2.84    0.43
  20   7  -6    3.18    0.39
 -20  -7   7    5.54    0.72
 -20  -7   7    5.22    0.70
 -20  -7   7    5.21    0.73
  20   7  -7    5.94    0.69
  20   7  -7    4.15    0.69
 -20  -7   8    0.58    0.18
 -20  -7   8    0.15    0.16
 -20  -7   8    0.48    0.20
  20   7  -8    0.43    0.13
  20   7  -8    0.39    0.13
 -20  -7   9    6.20    0.86
 -20  -7   9    5.84    0.88
  20   7  -9    6.98    0.85
  20   7  -9    6.51    0.86
 -20  -7  10    0.12    0.14
 -20  -7  10   -0.01    0.16
  20   7 -10    0.03    0.09
  20   7 -10    0.17    0.10
 -20  -7  11    4.68    0.71
  20   7 -11    5.42    0.67
  20   7 -11    4.85    0.68
 -20  -7  12    0.12    0.15
 -20  -7  12    0.08    0.16
  20   7 -12    0.26    0.11
 -20  -6   1    0.02    0.16
 -20  -6   1    0.52    0.18
 -20  -6   1    0.03    0.16
  20   6  -1    0.34    0.12
  20   6  -1    0.32    0.12
 -20  -6   2    2.22    0.33
 -20  -6   2    1.77    0.32
 -20  -6   2    2.39    0.35
 -20  -6   2    1.64    0.35
  20   6  -2    2.59    0.31
  20   6  -2    1.89    0.31
 -20  -6   3    0.35    0.14
 -20  -6   3   -0.05    0.12
 -20  -6   3   -0.33    0.17
 -20  -6   3   -0.08    0.17
  20   6  -3    0.00    0.11
  20   6  -3   -0.03    0.10
 -20  -6   4    1.36    0.25
 -20  -6   4    1.39    0.24
 -20  -6   4    1.45    0.28
 -20  -6   4    1.04    0.28
  20   6  -4    2.05    0.24
  20   6  -4    1.29    0.24
 -20  -6   5    0.59    0.20
 -20  -6   5    0.54    0.18
 -20  -6   5    0.81    0.21
 -20  -6   5    1.02    0.22
  20   6  -5    0.60    0.14
  20   6  -5    1.00    0.17
 -20  -6   6    0.53    0.15
 -20  -6   6    0.31    0.13
 -20  -6   6   -0.15    0.15
 -20  -6   6   -0.24    0.15
  20   6  -6    0.15    0.12
  20   6  -6    0.16    0.10
 -20  -6   7    0.46    0.15
 -20  -6   7   -0.09    0.16
  20   6  -7    0.22    0.11
 -20  -6   8    0.12    0.14
 -20  -6   8    0.23    0.14
 -20  -6   8   -0.13    0.15
  20   6  -8   -0.04    0.10
  20   6  -8    0.00    0.09
 -20  -6   9    0.01    0.15
 -20  -6   9    0.03    0.14
 -20  -6   9    0.16    0.17
  20   6  -9    0.41    0.11
  20   6  -9    0.02    0.11
 -20  -6  10   -0.31    0.13
 -20  -6  10    0.23    0.15
  20   6 -10    0.12    0.10
  20   6 -10    0.14    0.10
 -20  -6  11    1.46    0.24
 -20  -6  11    0.91    0.25
  20   6 -11    1.43    0.21
  20   6 -11    1.02    0.21
 -20  -6  12    0.12    0.14
 -20  -6  12    0.68    0.19
  20   6 -12    0.34    0.12
 -20  -6  13    2.94    0.39
 -20  -6  13    2.31    0.41
  20   6 -13    2.55    0.36
  20   6 -13    2.53    0.38
 -20  -5   1    0.32    0.16
 -20  -5   1    0.32    0.17
 -20  -5   1    0.42    0.19
 -20  -5   1    0.46    0.19
  20   5  -1    0.47    0.11
  20   5  -1    0.79    0.15
 -20  -5   2    1.41    0.25
 -20  -5   2    1.66    0.28
 -20  -5   2    1.51    0.30
  20   5  -2    1.77    0.24
  20   5  -2    1.28    0.24
 -20  -5   3   -0.17    0.13
 -20  -5   3    0.00    0.12
 -20  -5   3    0.31    0.15
  20   5  -3    0.04    0.09
  20   5  -3   -0.07    0.10
 -20  -5   4    3.94    0.61
 -20  -5   4    4.25    0.59
 -20  -5   4    3.99    0.60
  20   5  -4    4.95    0.58
 -20  -5   5    1.71    0.27
 -20  -5   5    1.61    0.25
 -20  -5   5    1.47    0.27
 -20  -5   5    1.38    0.31
  20   5  -5    1.51    0.24
 -20  -5   6    5.23    0.73
 -20  -5   6    5.23    0.72
 -20  -5   6    5.08    0.73
 -20  -5   6    4.67    0.74
  20   5  -6    5.62    0.71
  20   5  -6    5.99    0.73
 -20  -5   7    2.17    0.32
 -20  -5   7    1.80    0.30
 -20  -5   7    1.97    0.31
 -20  -5   7    1.28    0.32
  20   5  -7    2.31    0.28
  20   5  -7    1.73    0.29
 -20  -5   8    2.76    0.44
 -20  -5   8    3.02    0.43
 -20  -5   8    2.55    0.45
  20   5  -8    3.45    0.43
 -20  -5   9    3.93    0.50
 -20  -5   9    2.66    0.46
 -20  -5   9    3.15    0.50
  20   5  -9    3.50    0.46
  20   5  -9    3.58    0.47
 -20  -5  10    1.08    0.24
 -20  -5  10    1.22    0.24
 -20  -5  10    1.11    0.25
  20   5 -10    1.30    0.21
  20   5 -10    1.43    0.22
 -20  -5  11    4.18    0.66
 -20  -5  11    5.23    0.69
  20   5 -11    5.15    0.65
  20   5 -11    5.02    0.66
 -20  -5  12    0.54    0.18
 -20  -5  12    0.94    0.21
  20   5 -12    0.85    0.16
  20   5 -12    0.82    0.16
 -20  -5  13    3.56    0.54
 -20  -5  13    3.48    0.56
  20   5 -13    4.23    0.53
  20   5 -13    4.01    0.54
 -20  -5  14    0.56    0.18
 -20  -5  14    0.27    0.18
  20   5 -14    0.37    0.12
  20   5 -14    0.43    0.14
 -20  -4   1    0.73    0.18
 -20  -4   1    0.66    0.17
 -20  -4   1    0.98    0.19
 -20  -4   1    0.64    0.21
  20   4  -1    0.79    0.15
  20   4  -1    0.22    0.21
  20   4  -1    0.82    0.16
 -20  -4   2    2.50    0.36
 -20  -4   2    2.04    0.35
 -20  -4   2    2.14    0.35
 -20  -4   2    2.22    0.37
  20   4  -2    2.67    0.33
  20   4  -2    2.20    0.34
 -20  -4   3   -0.04    0.15
 -20  -4   3   -0.02    0.14
 -20  -4   3   -0.02    0.15
 -20  -4   3   -0.33    0.14
  20   4  -3    0.07    0.09
  20   4  -3   -0.14    0.09
 -20  -4   4    1.95    0.35
 -20  -4   4    2.03    0.33
 -20  -4   4    2.31    0.35
 -20  -4   4    2.02    0.36
  20   4  -4    2.63    0.31
  20   4  -4    2.01    0.32
 -20  -4   5   -0.19    0.14
 -20  -4   5    0.06    0.11
 -20  -4   5    0.14    0.15
 -20  -4   5    0.05    0.14
  20   4  -5    0.03    0.09
  20   4  -5    0.08    0.09
 -20  -4   6    0.56    0.16
 -20  -4   6    0.28    0.13
 -20  -4   6    0.20    0.15
  20   4  -6    0.06    0.11
 -20  -4   7    0.19    0.14
 -20  -4   7    0.17    0.12
 -20  -4   7   -0.10    0.14
  20   4  -7    0.07    0.08
 -20  -4   8    0.08    0.14
 -20  -4   8   -0.26    0.13
 -20  -4   8   -0.45    0.12
 -20  -4   8    0.09    0.14
  20   4  -8   -0.03    0.09
  20   4  -8   -0.18    0.10
 -20  -4   9    0.03    0.15
 -20  -4   9   -0.14    0.14
  20   4  -9   -0.07    0.11
 -20  -4  10    0.14    0.13
 -20  -4  10    0.44    0.14
 -20  -4  10    0.10    0.18
  20   4 -10    0.19    0.10
  20   4 -10    0.26    0.12
 -20  -4  11    0.31    0.17
 -20  -4  11    0.72    0.15
 -20  -4  11    0.51    0.19
  20   4 -11    0.36    0.13
  20   4 -11    0.53    0.14
 -20  -4  12    0.70    0.18
 -20  -4  12    0.74    0.22
  20   4 -12    0.96    0.16
  20   4 -12    0.69    0.17
 -20  -4  13    2.43    0.34
 -20  -4  13    2.21    0.35
  20   4 -13    2.27    0.30
  20   4 -13    1.57    0.31
 -20  -4  14    0.01    0.14
 -20  -4  14    0.28    0.16
  20   4 -14    0.05    0.10
  20   4 -14   -0.12    0.10
 -20  -4  15    0.56    0.24
 -20  -3   1    0.67    0.19
 -20  -3   1    0.88    0.20
 -20  -3   1    1.34    0.23
  20   3  -1    0.96    0.22
  20   3  -1    0.64    0.16
 -20  -3   2    2.41    0.38
 -20  -3   2    2.27    0.37
 -20  -3   2    2.17    0.37
 -20  -3   2    2.73    0.40
  20   3  -2    2.90    0.37
 -20  -3   3    0.15    0.14
 -20  -3   3    0.22    0.15
 -20  -3   3    0.04    0.15
 -20  -3   3   -0.04    0.14
  20   3  -3    0.28    0.09
  20   3  -3    0.11    0.10
 -20  -3   4    3.33    0.50
 -20  -3   4    3.05    0.51
 -20  -3   4    4.09    0.54
  20   3  -4    4.08    0.49
  20   3  -4    3.67    0.50
 -20  -3   5    0.22    0.13
 -20  -3   5   -0.08    0.13
 -20  -3   5    0.08    0.16
 -20  -3   5    0.18    0.15
  20   3  -5    0.20    0.09
  20   3  -5   -0.01    0.10
 -20  -3   6    3.83    0.49
 -20  -3   6    2.70    0.46
 -20  -3   6    3.37    0.47
 -20  -3   6    3.00    0.49
  20   3  -6    3.84    0.45
  20   3  -6    3.32    0.47
 -20  -3   7    0.06    0.12
 -20  -3   7    0.25    0.13
 -20  -3   7    0.60    0.16
 -20  -3   7    0.19    0.16
  20   3  -7    0.15    0.09
  20   3  -7    0.17    0.11
 -20  -3   8    4.97    0.72
 -20  -3   8    4.38    0.71
 -20  -3   8    5.37    0.71
  20   3  -8    6.54    0.71
 -20  -3   9    2.05    0.30
 -20  -3   9    1.86    0.29
 -20  -3   9    1.42    0.31
  20   3  -9    1.80    0.26
  20   3  -9    1.82    0.28
 -20  -3  10    4.88    0.80
  20   3 -10    6.52    0.78
 -20  -3  11    4.81    0.68
 -20  -3  11    4.21    0.66
 -20  -3  11    4.58    0.69
  20   3 -11    5.55    0.66
  20   3 -11    5.49    0.68
 -20  -3  12    1.48    0.26
 -20  -3  12    2.01    0.30
  20   3 -12    1.67    0.24
  20   3 -12    1.16    0.25
 -20  -3  13    3.86    0.57
 -20  -3  13    3.17    0.59
  20   3 -13    4.89    0.56
  20   3 -13    4.18    0.57
 -20  -3  14   -0.09    0.14
 -20  -3  14    0.23    0.16
  20   3 -14    0.29    0.11
  20   3 -14    0.06    0.11
 -20  -3  15    2.02    0.38
  20   3 -15    2.48    0.36
  20   3 -15    3.01    0.38
 -20  -2   1    1.48    0.27
 -20  -2   1    2.14    0.29
 -20  -2   1    1.62    0.30
  20   2  -1    1.71    0.26
  20   2  -1    1.98    0.31
  20   2  -1    1.42    0.26
 -20  -2   2    1.25    0.22
 -20  -2   2    1.09    0.23
 -20  -2   2    1.38    0.22
 -20  -2   2    1.14    0.24
  20   2  -2    1.01    0.19
  20   2  -2    1.20    0.25
  20   2  -2    1.09    0.20
 -20  -2   3    0.53    0.15
 -20  -2   3    0.66    0.17
 -20  -2   3    0.82    0.18
 -20  -2   3    0.67    0.19
  20   2  -3    0.58    0.12
  20   2  -3    0.44    0.13
 -20  -2   4    1.90    0.34
 -20  -2   4    2.06    0.34
 -20  -2   4    2.13    0.35
 -20  -2   4    2.52    0.36
  20   2  -4    2.49    0.32
  20   2  -4    2.31    0.33
 -20  -2   5    0.34    0.15
 -20  -2   5    0.24    0.16
 -20  -2   5    0.26    0.16
  20   2  -5    0.34    0.10
  20   2  -5    0.36    0.11
 -20  -2   6    1.32    0.25
 -20  -2   6    1.16    0.23
 -20  -2   6    1.35    0.25
 -20  -2   6    1.25    0.26
  20   2  -6    1.62    0.22
  20   2  -6    1.59    0.24
 -20  -2   7   -0.06    0.12
 -20  -2   7    0.17    0.13
 -20  -2   7    0.34    0.14
 -20  -2   7    0.43    0.17
  20   2  -7    0.12    0.09
  20   2  -7    0.12    0.11
 -20  -2   8    0.10    0.14
 -20  -2   8    0.20    0.13
 -20  -2   8    0.05    0.14
 -20  -2   8    0.31    0.15
  20   2  -8    0.23    0.11
  20   2  -8    0.09    0.10
  20   2  -9    0.16    0.11
 -20  -2  10    0.36    0.13
 -20  -2  10    0.46    0.18
  20   2 -10    0.13    0.12
 -20  -2  11    0.76    0.20
 -20  -2  11    0.78    0.18
 -20  -2  11    1.21    0.23
  20   2 -11    0.91    0.16
  20   2 -11    0.69    0.17
 -20  -2  12    0.40    0.20
 -20  -2  12    0.74    0.18
 -20  -2  12    0.83    0.21
  20   2 -12    0.90    0.15
  20   2 -12    0.50    0.15
 -20  -2  13    2.17    0.33
 -20  -2  13    2.39    0.37
  20   2 -13    2.11    0.31
  20   2 -13    2.34    0.33
 -20  -2  14    0.09    0.14
 -20  -2  14    0.27    0.15
  20   2 -14   -0.08    0.10
  20   2 -14    0.04    0.10
 -20  -2  15    3.92    0.50
  20   2 -15    3.12    0.47
  20   2 -15    3.50    0.49
 -20  -1   1    0.42    0.14
 -20  -1   1    0.34    0.16
 -20  -1   1    0.59    0.19
  20   1  -1    0.72    0.13
  20   1  -1    0.74    0.19
  20   1  -1    0.64    0.14
 -20  -1   2    1.28    0.23
 -20  -1   2    1.34    0.25
 -20  -1   2    1.42    0.25
  20   1  -2    1.55    0.26
  20   1  -2    0.98    0.22
 -20  -1   3    0.10    0.11
 -20  -1   3    0.02    0.14
 -20  -1   3    0.11    0.15
 -20  -1   3    0.18    0.15
  20   1  -3    0.36    0.10
  20   1  -3    0.55    0.17
  20   1  -3   -0.08    0.09
 -20  -1   4    4.19    0.48
 -20  -1   4    3.41    0.46
 -20  -1   4    2.74    0.45
 -20  -1   4    2.29    0.47
  20   1  -4    3.72    0.45
  20   1  -4    3.32    0.46
 -20  -1   5    0.51    0.16
 -20  -1   5    0.55    0.15
 -20  -1   5    0.24    0.16
  20   1  -5    0.48    0.11
  20   1  -5    0.58    0.13
 -20  -1   6    8.03    1.08
 -20  -1   6    7.64    1.07
 -20  -1   6    7.59    1.06
 -20  -1   6    8.50    1.10
  20   1  -6    8.92    1.07
  20   1  -6    8.57    1.08
 -20  -1   7    0.06    0.13
 -20  -1   7   -0.03    0.12
 -20  -1   7    0.10    0.11
 -20  -1   7    0.51    0.17
  20   1  -7    0.04    0.09
  20   1  -7   -0.04    0.10
 -20  -1   8   12.73    1.59
 -20  -1   8   13.80    1.59
 -20  -1   8   10.86    1.56
 -20  -1   8   11.98    1.60
  20   1  -8   12.57    1.57
  20   1  -8   11.40    1.57
 -20  -1   9    1.56    0.24
 -20  -1   9    1.56    0.24
 -20  -1   9    1.24    0.26
  20   1  -9    1.46    0.21
  20   1  -9    0.90    0.21
 -20  -1  10   10.87    1.31
 -20  -1  10    9.17    1.29
 -20  -1  11    3.06    0.45
 -20  -1  11    2.38    0.42
 -20  -1  11    3.73    0.48
  20   1 -11    3.20    0.42
  20   1 -11    3.18    0.43
 -20  -1  12    1.70    0.29
 -20  -1  12    1.64    0.26
 -20  -1  12    1.70    0.31
  20   1 -12    1.96    0.26
  20   1 -12    1.39    0.27
 -20  -1  13    3.03    0.47
 -20  -1  13    3.69    0.51
  20   1 -13    3.32    0.46
  20   1 -13    3.73    0.48
 -20  -1  14    0.08    0.14
 -20  -1  14   -0.12    0.14
  20   1 -14    0.11    0.11
  20   1 -14   -0.02    0.10
 -20  -1  15    3.22    0.46
 -20  -1  15    3.21    0.50
  20   1 -15    2.92    0.44
  20   1 -15    3.70    0.47
 -20  -1  16   -0.48    0.14
  20   1 -16    0.18    0.12
 -20   0   1    4.02    0.58
 -20   0   1    3.47    0.57
 -20   0   1    3.95    0.60
  20   0  -1    4.91    0.57
  20   0  -1    4.35    0.59
  20   0  -1    4.57    0.58
 -20   0   2    1.24    0.24
 -20   0   2    1.57    0.27
  20   0  -2    1.29    0.26
  20   0  -2    1.55    0.24
 -20   0   3    2.16    0.36
 -20   0   3    2.56    0.40
  20   0  -3    2.60    0.36
  20   0  -3    2.52    0.39
  20   0  -3    2.90    0.37
 -20   0   4    3.49    0.48
 -20   0   4    2.94    0.47
 -20   0   4    3.13    0.46
 -20   0   4    3.43    0.51
  20   0  -4    3.47    0.45
  20   0  -4    3.94    0.48
 -20   0   5    1.08    0.21
 -20   0   5    1.26    0.25
  20   0  -5    1.12    0.18
  20   0  -5    1.21    0.21
 -20   0   6    0.72    0.17
 -20   0   6    0.74    0.17
 -20   0   6    0.52    0.19
  20   0  -6    1.03    0.16
  20   0  -6    0.79    0.16
 -20   0   7    0.04    0.14
 -20   0   7   -0.12    0.11
 -20   0   7    0.10    0.11
 -20   0   7    0.24    0.15
  20   0  -7    0.14    0.10
  20   0  -7    0.04    0.10
 -20   0   8   -0.05    0.14
 -20   0   8    0.09    0.13
 -20   0   8   -0.01    0.10
 -20   0   8    0.02    0.15
  20   0  -8    0.08    0.10
  20   0  -8   -0.07    0.10
 -20   0   9    0.03    0.14
 -20   0   9   -0.15    0.13
 -20   0   9    0.33    0.15
  20   0  -9   -0.03    0.10
  20   0  -9    0.43    0.12
 -20   0  10    0.40    0.16
 -20   0  10    0.47    0.16
  20   0 -10    0.49    0.13
 -20   0  11    0.45    0.15
 -20   0  11    0.42    0.17
  20   0 -11    0.24    0.12
 -20   0  12    0.46    0.18
 -20   0  12    0.81    0.18
 -20   0  12    0.86    0.20
  20   0 -12    0.70    0.15
  20   0 -12    0.54    0.15
 -20   0  13    1.30    0.23
 -20   0  13    1.14    0.26
  20   0 -13    1.62    0.21
  20   0 -13    1.03    0.22
 -20   0  14    0.80    0.19
 -20   0  14    0.97    0.22
  20   0 -14    0.80    0.17
  20   0 -14    0.91    0.18
 -20   0  15    5.48    0.66
 -20   0  15    4.74    0.68
  20   0 -15    5.27    0.65
  20   0 -15    3.78    0.64
 -20   0  16    0.24    0.16
  20   0 -16    0.87    0.16
 -20   1   1    0.74    0.18
 -20   1   1    1.14    0.20
 -20   1   1    0.94    0.20
 -20   1   1    1.00    0.23
  20  -1  -1    1.15    0.18
  20  -1  -1    1.04    0.22
  20  -1  -1    1.16    0.19
 -20   1   2    0.69    0.16
 -20   1   2    0.38    0.17
 -20   1   2    0.41    0.16
 -20   1   2    0.80    0.19
  20  -1  -2    0.44    0.13
  20  -1  -2    0.74    0.18
  20  -1  -2    0.72    0.14
 -20   1   3    4.27    0.57
 -20   1   3    3.73    0.57
 -20   1   3    4.55    0.60
  20  -1  -3    4.37    0.59
  20  -1  -3    3.91    0.56
 -20   1   4    2.58    0.42
 -20   1   4    3.59    0.43
 -20   1   4    2.47    0.40
 -20   1   4    2.77    0.44
  20  -1  -4    3.40    0.41
  20  -1  -4    2.92    0.42
 -20   1   5    4.90    0.71
 -20   1   5    4.30    0.70
 -20   1   5    5.11    0.70
 -20   1   5    6.22    0.75
  20  -1  -5    6.43    0.71
  20  -1  -5    5.52    0.72
 -20   1   6    9.92    1.32
 -20   1   6    9.60    1.31
 -20   1   6    9.64    1.34
  20  -1  -6   10.87    1.32
  20  -1  -6   10.53    1.33
 -20   1   7    2.07    0.33
 -20   1   7    1.56    0.30
 -20   1   7    2.30    0.30
 -20   1   7    2.68    0.36
  20  -1  -7    2.30    0.31
  20  -1  -7    1.93    0.31
 -20   1   8   16.89    2.14
 -20   1   8   15.50    2.16
  20  -1  -8   17.21    2.14
  20  -1  -8   16.31    2.15
 -20   1   9    0.20    0.15
 -20   1   9   -0.10    0.12
 -20   1   9    0.14    0.12
 -20   1   9    0.19    0.14
  20  -1  -9    0.10    0.10
  20  -1  -9   -0.05    0.11
 -20   1  10   14.32    1.82
 -20   1  10   13.31    1.80
  20  -1 -10   14.28    1.80
 -20   1  11    0.41    0.15
 -20   1  11    0.19    0.16
  20  -1 -11    0.60    0.14
 -20   1  12    3.80    0.53
 -20   1  12    3.14    0.51
 -20   1  12    4.06    0.55
  20  -1 -12    4.27    0.51
  20  -1 -12    3.41    0.51
 -20   1  13    2.15    0.30
 -20   1  13    1.85    0.32
  20  -1 -13    1.75    0.28
  20  -1 -13    1.89    0.30
 -20   1  14    1.20    0.24
 -20   1  14    1.68    0.28
  20  -1 -14    1.29    0.22
  20  -1 -14    1.31    0.23
 -20   1  15    2.66    0.38
 -20   1  15    1.98    0.39
  20  -1 -15    2.55    0.36
  20  -1 -15    2.68    0.37
 -20   1  16    0.92    0.20
  20  -1 -16    0.58    0.16
 -20   2   1    8.66    1.20
 -20   2   1    9.26    1.20
 -20   2   1    8.86    1.19
 -20   2   1    9.32    1.23
  20  -2  -1    8.76    1.19
  20  -2  -1   10.58    1.23
  20  -2  -1    9.52    1.21
 -20   2   2    0.73    0.15
 -20   2   2    0.51    0.16
 -20   2   2    0.34    0.13
 -20   2   2    0.68    0.19
  20  -2  -2    0.28    0.14
  20  -2  -2    0.62    0.17
  20  -2  -2    0.60    0.15
 -20   2   3    7.74    1.04
 -20   2   3    7.27    1.06
  20  -2  -3    7.35    1.05
  20  -2  -3    9.24    1.06
 -20   2   4    2.87    0.39
 -20   2   4    3.02    0.39
 -20   2   4    2.25    0.40
  20  -2  -4    2.63    0.37
  20  -2  -4    2.52    0.39
 -20   2   5    2.20    0.32
 -20   2   5    2.22    0.31
 -20   2   5    1.75    0.30
 -20   2   5    2.36    0.35
  20  -2  -5    2.12    0.30
  20  -2  -5    1.98    0.31
 -20   2   6    0.79    0.16
 -20   2   6    0.48    0.16
 -20   2   6    0.53    0.18
  20  -2  -6    0.77    0.16
  20  -2  -6    0.95    0.17
 -20   2   7    0.12    0.13
 -20   2   7    0.23    0.13
 -20   2   7    0.01    0.12
 -20   2   7   -0.25    0.13
  20  -2  -7    0.10    0.10
  20  -2  -7   -0.10    0.11
 -20   2   8    0.06    0.14
 -20   2   8    0.11    0.13
 -20   2   8    0.05    0.12
 -20   2   8    0.43    0.15
  20  -2  -8    0.40    0.13
  20  -2  -8    0.21    0.12
 -20   2   9    0.13    0.12
 -20   2   9    0.02    0.12
 -20   2   9    0.05    0.11
 -20   2   9    0.00    0.13
  20  -2  -9    0.12    0.11
 -20   2  10    0.39    0.14
 -20   2  10    0.19    0.14
 -20   2  10    0.32    0.16
  20  -2 -10    0.65    0.14
  20  -2 -10   -0.08    0.12
 -20   2  11   -0.25    0.13
 -20   2  11    0.52    0.17
  20  -2 -11    0.00    0.11
 -20   2  12    1.46    0.27
 -20   2  12    1.63    0.25
 -20   2  12    1.52    0.27
  20  -2 -12    1.59    0.23
  20  -2 -12    1.10    0.24
 -20   2  13    0.74    0.17
 -20   2  13    0.43    0.17
  20  -2 -13    0.66    0.15
  20  -2 -13    0.28    0.14
 -20   2  14    4.02    0.55
 -20   2  14    4.69    0.60
  20  -2 -14    3.79    0.54
  20  -2 -14    3.82    0.55
 -20   2  15    4.90    0.62
 -20   2  15    4.17    0.64
  20  -2 -15    4.63    0.61
  20  -2 -15    4.33    0.62
 -20   2  16    3.35    0.52
  20  -2 -16    3.48    0.49
 -20   3   1    2.31    0.38
 -20   3   1    2.80    0.38
 -20   3   1    2.68    0.36
 -20   3   1    2.93    0.41
  20  -3  -1    2.23    0.36
  20  -3  -1    3.11    0.40
  20  -3  -1    2.52    0.38
 -20   3   2    0.32    0.12
 -20   3   2    0.46    0.12
 -20   3   2    0.19    0.16
  20  -3  -2    0.34    0.15
  20  -3  -2    0.27    0.15
  20  -3  -2    0.47    0.14
 -20   3   3    6.46    0.86
 -20   3   3    5.61    0.88
  20  -3  -3    6.58    0.86
  20  -3  -3    6.74    0.88
  20  -3  -3    7.09    0.88
 -20   3   4    0.14    0.12
 -20   3   4    0.26    0.13
 -20   3   4    0.01    0.14
  20  -3  -4    0.30    0.11
  20  -3  -4    0.15    0.10
 -20   3   5   11.67    1.40
 -20   3   5   10.38    1.38
 -20   3   5   10.32    1.38
 -20   3   5   11.11    1.42
  20  -3  -5   11.01    1.39
  20  -3  -5    9.81    1.39
 -20   3   6    5.97    0.74
  20  -3  -6    5.35    0.73
  20  -3  -6    5.42    0.75
 -20   3   7    7.14    0.99
 -20   3   7    5.98    0.96
 -20   3   7    8.07    0.98
 -20   3   7    8.26    1.02
  20  -3  -7    7.87    0.97
  20  -3  -7    8.48    1.00
 -20   3   8   13.84    1.71
 -20   3   8   13.09    1.69
 -20   3   8   12.44    1.69
 -20   3   8   13.13    1.72
  20  -3  -8   12.85    1.69
  20  -3  -8   13.14    1.70
 -20   3   9    1.92    0.31
 -20   3   9    1.55    0.30
 -20   3   9    2.07    0.30
 -20   3   9    2.06    0.33
  20  -3  -9    2.07    0.30
  20  -3  -9    2.04    0.30
 -20   3  10   14.41    1.69
 -20   3  10   13.63    1.68
 -20   3  10   10.90    1.69
  20  -3 -10   13.64    1.67
  20  -3 -10   11.57    1.68
 -20   3  11    0.27    0.14
 -20   3  11    0.81    0.20
  20  -3 -11    0.37    0.14
 -20   3  12    6.92    0.95
 -20   3  12    7.49    0.99
  20  -3 -12    7.37    0.95
  20  -3 -12    7.44    0.97
 -20   3  13    0.86    0.17
 -20   3  13    0.79    0.19
  20  -3 -13    0.44    0.17
  20  -3 -13    0.72    0.17
 -20   3  14    3.39    0.53
 -20   3  14    3.25    0.56
  20  -3 -14    4.31    0.53
  20  -3 -14    4.38    0.55
 -20   3  15    1.56    0.25
  20  -3 -15    1.30    0.24
  20  -3 -15    1.48    0.24
 -20   3  16    0.85    0.21
  20  -3 -16    0.81    0.18
 -20   4   1    9.20    1.16
 -20   4   1    9.73    1.15
 -20   4   1    8.32    1.14
 -20   4   1    9.40    1.18
  20  -4  -1    7.87    1.14
  20  -4  -1    8.39    1.15
  20  -4  -1    9.08    1.16
 -20   4   2   -0.05    0.10
 -20   4   2    0.14    0.12
 -20   4   2    0.18    0.15
  20  -4  -2   -0.10    0.13
  20  -4  -2    0.20    0.10
 -20   4   3   11.84    1.55
 -20   4   3   12.42    1.55
 -20   4   3   10.66    1.54
 -20   4   3   11.41    1.57
  20  -4  -3   11.71    1.54
  20  -4  -3   12.69    1.57
  20  -4  -3   13.23    1.57
 -20   4   4    0.07    0.13
 -20   4   4    0.01    0.11
 -20   4   4   -0.15    0.14
  20  -4  -4    0.07    0.10
  20  -4  -4    0.20    0.11
 -20   4   5    4.08    0.59
 -20   4   5    3.67    0.57
 -20   4   5    4.60    0.58
 -20   4   5    3.91    0.60
  20  -4  -5    4.45    0.57
  20  -4  -5    5.06    0.60
 -20   4   6   -0.13    0.14
 -20   4   6    0.32    0.13
 -20   4   6    0.05    0.12
 -20   4   6   -0.09    0.13
  20  -4  -6    0.21    0.12
  20  -4  -6    0.17    0.12
 -20   4   7    0.36    0.17
 -20   4   7    0.56    0.14
 -20   4   7    0.30    0.17
  20  -4  -7    0.54    0.13
  20  -4  -7    0.35    0.12
 -20   4   8    0.41    0.15
 -20   4   8    0.09    0.14
 -20   4   8    0.44    0.14
 -20   4   8    0.32    0.18
  20  -4  -8    0.31    0.13
  20  -4  -8    0.47    0.14
 -20   4   9   -0.19    0.13
 -20   4   9   -0.04    0.11
 -20   4   9    0.01    0.11
 -20   4   9    0.08    0.14
  20  -4  -9    0.18    0.11
  20  -4  -9    0.13    0.11
 -20   4  10    0.33    0.13
 -20   4  10    0.06    0.12
  20  -4 -10    0.53    0.13
 -20   4  11    0.68    0.16
 -20   4  11    0.18    0.15
 -20   4  11    0.36    0.16
  20  -4 -11    0.64    0.15
  20  -4 -11    0.61    0.15
 -20   4  12    3.44    0.44
 -20   4  12    3.17    0.47
  20  -4 -12    3.08    0.43
  20  -4 -12    2.57    0.43
 -20   4  13    0.23    0.12
  20  -4 -13    0.10    0.12
  20  -4 -13    0.31    0.11
 -20   4  14    8.18    1.00
 -20   4  14    7.01    1.02
  20  -4 -14    8.20    1.00
  20  -4 -14    6.61    1.00
 -20   4  15    1.01    0.18
 -20   4  15    0.41    0.19
  20  -4 -15    0.37    0.17
  20  -4 -15    0.54    0.15
 -20   5   1    0.47    0.15
 -20   5   1    0.29    0.13
 -20   5   1    0.51    0.13
 -20   5   1    0.64    0.19
  20  -5  -1    0.95    0.15
  20  -5  -1    0.55    0.16
  20  -5  -1    0.11    0.13
 -20   5   2    1.86    0.30
 -20   5   2    1.60    0.28
 -20   5   2    2.62    0.34
  20  -5  -2    2.09    0.31
  20  -5  -2    1.71    0.29
 -20   5   3    3.45    0.46
 -20   5   3    3.81    0.45
 -20   5   3    2.57    0.45
 -20   5   3    3.08    0.47
  20  -5  -3    3.08    0.46
 -20   5   4    0.11    0.13
 -20   5   4    0.05    0.12
 -20   5   4    0.29    0.15
  20  -5  -4    0.18    0.11
  20  -5  -4    0.42    0.12
 -20   5   5    9.04    1.19
 -20   5   5    8.58    1.19
 -20   5   5    9.56    1.23
  20  -5  -5    9.27    1.19
  20  -5  -5    9.54    1.21
 -20   5   6    0.59    0.17
 -20   5   6    0.71    0.14
 -20   5   6    0.44    0.15
 -20   5   6    0.56    0.17
  20  -5  -6    0.54    0.14
 -20   5   7    9.53    1.26
 -20   5   7   10.20    1.25
 -20   5   7    9.25    1.25
 -20   5   7    9.45    1.28
  20  -5  -7   10.13    1.25
  20  -5  -7    8.59    1.25
 -20   5   8    2.92    0.40
 -20   5   8    2.64    0.38
 -20   5   8    2.85    0.39
 -20   5   8    2.38    0.40
  20  -5  -8    2.43    0.40
 -20   5   9    7.31    0.96
 -20   5   9    6.96    0.95
 -20   5   9    7.50    0.96
 -20   5   9    7.13    0.98
  20  -5  -9    7.05    0.95
  20  -5  -9    7.41    0.97
 -20   5  10    5.62    0.76
 -20   5  11    3.51    0.46
 -20   5  11    2.81    0.43
  20  -5 -11    3.63    0.44
  20  -5 -11    2.70    0.45
 -20   5  12    7.48    0.98
 -20   5  12    7.52    1.01
  20  -5 -12    7.69    0.98
  20  -5 -12    6.99    0.99
 -20   5  13   -0.06    0.13
 -20   5  13    0.01    0.15
  20  -5 -13    0.03    0.14
  20  -5 -13   -0.22    0.12
 -20   5  14    5.01    0.76
 -20   5  14    7.75    0.83
  20  -5 -14    5.49    0.77
  20  -5 -14    6.07    0.78
 -20   5  15    1.00    0.17
 -20   5  15    0.32    0.19
  20  -5 -15    0.65    0.16
  20  -5 -15    0.50    0.15
 -20   6   1    5.07    0.68
 -20   6   1    4.83    0.67
 -20   6   1    4.41    0.70
  20  -6  -1    4.99    0.68
  20  -6  -1    5.59    0.69
 -20   6   2    1.74    0.28
 -20   6   2    1.39    0.28
 -20   6   2    2.05    0.29
 -20   6   2    2.21    0.32
  20  -6  -2    1.68    0.28
  20  -6  -2    2.22    0.31
  20  -6  -2    1.71    0.28
 -20   6   3    6.31    0.85
 -20   6   3    6.55    0.84
 -20   6   3    7.01    0.88
  20  -6  -3    5.65    0.83
  20  -6  -3    6.88    0.86
 -20   6   4    1.41    0.28
 -20   6   4    1.58    0.27
  20  -6  -4    1.68    0.27
  20  -6  -4    2.32    0.29
 -20   6   5    3.33    0.48
 -20   6   5    3.84    0.50
 -20   6   5    3.18    0.51
  20  -6  -5    3.50    0.49
  20  -6  -5    4.04    0.51
 -20   6   6    0.05    0.13
 -20   6   6   -0.07    0.12
 -20   6   6   -0.04    0.11
 -20   6   6   -0.16    0.13
  20  -6  -6    0.01    0.10
 -20   6   7    0.92    0.20
 -20   6   7    0.90    0.17
 -20   6   7    0.86    0.18
  20  -6  -7    0.80    0.18
  20  -6  -7    1.25    0.20
 -20   6   8    0.74    0.18
 -20   6   8    0.58    0.16
 -20   6   8    0.66    0.16
  20  -6  -8    0.75    0.16
  20  -6  -8    0.77    0.17
 -20   6   9    0.08    0.13
 -20   6   9    0.44    0.13
 -20   6   9    0.45    0.15
 -20   6   9   -0.15    0.11
  20  -6  -9    0.01    0.12
  20  -6  -9   -0.13    0.12
 -20   6  10    0.31    0.14
 -20   6  10   -0.22    0.15
  20  -6 -10   -0.13    0.11
 -20   6  11    2.60    0.34
 -20   6  11    2.56    0.38
  20  -6 -11    1.95    0.34
  20  -6 -11    2.25    0.35
 -20   6  12    1.68    0.26
 -20   6  12    1.43    0.28
  20  -6 -12    1.97    0.26
  20  -6 -12    1.10    0.26
 -20   6  13    1.13    0.18
 -20   6  13    0.66    0.23
  20  -6 -13    0.84    0.18
  20  -6 -13    0.88    0.20
 -20   6  14    5.79    0.67
 -20   6  14    4.20    0.68
  20  -6 -14    4.91    0.66
  20  -6 -14    4.52    0.67
 -20   6  15    0.08    0.15
  20  -6 -15   -0.18    0.13
 -20   7   1    0.41    0.12
 -20   7   1    0.29    0.15
 -20   7   1   -0.03    0.10
  20  -7  -1    0.28    0.14
  20  -7  -1    0.15    0.12
  20  -7  -1   -0.10    0.12
 -20   7   2    2.37    0.35
 -20   7   2    2.46    0.34
 -20   7   2    1.99    0.34
  20  -7  -2    2.26    0.34
  20  -7  -2    2.76    0.36
 -20   7   3    2.87    0.43
 -20   7   3    3.42    0.43
 -20   7   3    2.85    0.44
  20  -7  -3    2.87    0.43
  20  -7  -3    3.04    0.44
 -20   7   4    0.53    0.14
 -20   7   4    0.65    0.16
 -20   7   4    0.32    0.13
  20  -7  -4    0.46    0.15
  20  -7  -4    0.39    0.15
 -20   7   5    6.37    0.85
 -20   7   5    6.63    0.84
 -20   7   5    6.06    0.87
 -20   7   5    5.71    0.84
  20  -7  -5    7.31    0.86
  20  -7  -5    6.33    0.86
 -20   7   6    0.47    0.17
 -20   7   6    0.41    0.13
  20  -7  -6    0.47    0.14
 -20   7   7    8.10    0.99
 -20   7   7    7.63    0.97
 -20   7   7    7.49    1.01
 -20   7   7    7.31    0.98
  20  -7  -7    7.05    0.97
  20  -7  -7    6.94    0.99
 -20   7   8    0.24    0.12
 -20   7   8    0.35    0.11
 -20   7   8   -0.04    0.16
 -20   7   8    0.03    0.11
  20  -7  -8    0.23    0.12
  20  -7  -8   -0.04    0.11
 -20   7   9    8.77    1.16
 -20   7   9    8.83    1.16
 -20   7  10    3.22    0.45
 -20   7  10    3.31    0.45
 -20   7  10    3.57    0.49
  20  -7 -10    3.29    0.45
  20  -7 -10    2.82    0.46
 -20   7  11    4.27    0.64
 -20   7  11    5.71    0.69
  20  -7 -11    4.59    0.65
  20  -7 -11    5.23    0.67
 -20   7  12    6.59    0.83
 -20   7  12    5.98    0.86
  20  -7 -12    5.79    0.83
  20  -7 -12    6.82    0.86
 -20   7  13    0.08    0.14
 -20   7  13    0.37    0.16
  20  -7 -13    0.62    0.16
  20  -7 -13    0.07    0.12
 -20   7  14    6.20    0.88
 -20   7  14    7.32    0.92
  20  -7 -14    6.73    0.89
  20  -7 -14    6.68    0.90
 -20   8   1    2.07    0.28
 -20   8   1    2.06    0.29
 -20   8   1    1.52    0.30
 -20   8   1    1.47    0.27
  20  -8  -1    1.78    0.28
  20  -8  -1    1.65    0.29
 -20   8   2    4.96    0.64
 -20   8   2    4.35    0.64
 -20   8   2    3.96    0.65
  20  -8  -2    4.69    0.64
  20  -8  -2    6.07    0.67
 -20   8   3    2.82    0.39
 -20   8   3    3.04    0.42
 -20   8   3    2.16    0.38
  20  -8  -3    2.67    0.39
  20  -8  -3    2.83    0.40
 -20   8   4    2.02    0.33
 -20   8   4    2.34    0.32
 -20   8   4    1.88    0.35
 -20   8   4    2.02    0.32
  20  -8  -4    2.62    0.33
  20  -8  -4    2.12    0.34
 -20   8   5    3.75    0.47
 -20   8   5    2.97    0.45
 -20   8   5    3.37    0.46
  20  -8  -5    2.88    0.46
  20  -8  -5    3.87    0.49
 -20   8   6   -0.06    0.12
 -20   8   6   -0.11    0.11
 -20   8   6    0.02    0.16
 -20   8   6    0.08    0.11
  20  -8  -6    0.01    0.11
  20  -8  -6    0.05    0.12
 -20   8   7    2.29    0.35
 -20   8   7    2.23    0.35
 -20   8   7    2.58    0.38
 -20   8   7    2.62    0.35
  20  -8  -7    1.98    0.35
  20  -8  -7    2.68    0.36
 -20   8   8    0.55    0.14
 -20   8   8    0.40    0.13
 -20   8   8    0.15    0.15
 -20   8   8    0.54    0.14
  20  -8  -8    0.43    0.14
  20  -8  -8    0.45    0.18
 -20   8   9    0.42    0.13
 -20   8   9    0.15    0.14
 -20   8   9    0.25    0.14
 -20   8   9    0.05    0.11
  20  -8  -9    0.06    0.13
  20  -8  -9   -0.01    0.14
 -20   8  10    0.15    0.12
 -20   8  10    0.14    0.13
 -20   8  10   -0.14    0.13
  20  -8 -10   -0.16    0.14
  20  -8 -10    0.20    0.12
 -20   8  11    2.07    0.31
 -20   8  11    1.19    0.31
  20  -8 -11    2.36    0.32
  20  -8 -11    2.35    0.33
 -20   8  12    1.35    0.21
 -20   8  12    1.27    0.24
  20  -8 -12    1.02    0.22
  20  -8 -12    0.99    0.22
 -20   8  13    0.27    0.17
 -20   8  13    0.46    0.18
  20  -8 -13    0.48    0.15
  20  -8 -13    0.72    0.17
 -20   9   1    0.09    0.11
 -20   9   1   -0.10    0.11
 -20   9   1    0.26    0.14
  20  -9  -1   -0.16    0.14
  20  -9  -1    0.01    0.11
 -20   9   2    1.49    0.24
 -20   9   2    1.16    0.25
  20  -9  -2    1.60    0.25
  20  -9  -2    1.25    0.24
 -20   9   3    0.89    0.19
 -20   9   3    1.26    0.20
 -20   9   3    1.16    0.22
 -20   9   3    0.64    0.18
  20  -9  -3    1.16    0.20
  20  -9  -3    1.22    0.22
 -20   9   4    1.69    0.28
 -20   9   4    2.11    0.29
 -20   9   4    1.85    0.30
 -20   9   4    1.50    0.28
  20  -9  -4    2.01    0.28
  20  -9  -4    1.55    0.29
 -20   9   5    3.83    0.57
 -20   9   5    4.86    0.58
  20  -9  -5    4.27    0.58
  20  -9  -5    3.91    0.59
 -20   9   6    1.36    0.24
 -20   9   6    1.04    0.24
 -20   9   6    1.64    0.26
 -20   9   6    1.57    0.24
  20  -9  -6    1.44    0.24
  20  -9  -6    1.63    0.27
 -20   9   7    6.52    0.90
 -20   9   7    7.31    0.90
 -20   9   7    6.42    0.91
 -20   9   7    6.59    0.90
  20  -9  -7    7.01    0.92
 -20   9   8    0.21    0.11
 -20   9   8   -0.15    0.13
 -20   9   8    0.09    0.11
  20  -9  -8   -0.05    0.12
 -20   9   9    9.62    1.33
 -20   9   9   10.12    1.33
 -20   9   9   11.10    1.36
 -20   9   9    9.16    1.32
  20  -9  -9   10.75    1.34
  20  -9  -9   11.22    1.36
 -20   9  10    1.75    0.25
 -20   9  10    1.46    0.27
  20  -9 -10    1.27    0.24
  20  -9 -10    1.22    0.25
 -20   9  11    5.52    0.73
 -20   9  11    5.03    0.74
  20  -9 -11    6.13    0.73
  20  -9 -11    4.71    0.73
 -20   9  12    3.16    0.43
 -20   9  12    2.88    0.44
  20  -9 -12    2.50    0.43
  20  -9 -12    3.26    0.44
 -20   9  13    1.88    0.32
 -20   9  13    2.34    0.36
  20  -9 -13    2.26    0.33
  20  -9 -13    2.10    0.34
 -20  10   1    0.44    0.14
 -20  10   1    0.10    0.13
  20 -10  -1    0.37    0.17
  20 -10  -1    0.44    0.16
 -20  10   2    8.66    1.18
 -20  10   2    8.48    1.17
 -20  10   2    8.24    1.19
 -20  10   2    9.68    1.19
  20 -10  -2    9.64    1.19
  20 -10  -2    9.63    1.20
 -20  10   3    2.33    0.36
 -20  10   3    3.09    0.38
 -20  10   3    2.82    0.39
 -20  10   3    2.54    0.37
  20 -10  -3    2.06    0.37
  20 -10  -3    2.56    0.39
 -20  10   4    3.44    0.44
 -20  10   4    2.81    0.44
 -20  10   4    3.54    0.46
 -20  10   4    2.43    0.43
  20 -10  -4    3.10    0.45
  20 -10  -4    3.87    0.47
 -20  10   5    2.30    0.37
 -20  10   5    2.60    0.38
 -20  10   5    2.66    0.40
  20 -10  -5    2.44    0.38
  20 -10  -5    3.16    0.40
 -20  10   6    0.00    0.11
 -20  10   6    0.03    0.15
 -20  10   6   -0.07    0.12
 -20  10   6    0.10    0.13
  20 -10  -6   -0.09    0.15
  20 -10  -6    0.55    0.15
 -20  10   7    1.45    0.23
 -20  10   7    1.04    0.21
 -20  10   8    0.00    0.13
 -20  10   8    0.09    0.13
 -20  10   8    0.02    0.12
 -20  10   8    0.12    0.12
  20 -10  -8    0.07    0.16
  20 -10  -8   -0.14    0.13
 -20  10   9    0.43    0.14
 -20  10   9    0.06    0.13
  20 -10  -9    0.48    0.14
  20 -10  -9   -0.06    0.13
 -20  10  10    0.67    0.17
 -20  10  10    0.99    0.21
  20 -10 -10    0.83    0.19
  20 -10 -10    0.74    0.19
 -20  10  11    1.42    0.21
 -20  10  11    0.48    0.19
  20 -10 -11    0.92    0.20
  20 -10 -11    0.75    0.20
 -20  10  12    0.96    0.20
 -20  10  12    0.88    0.23
  20 -10 -12    1.10    0.20
  20 -10 -12    0.70    0.20
 -20  11   1   -0.08    0.11
 -20  11   1    0.20    0.15
 -20  11   1    0.02    0.14
 -20  11   1    0.20    0.10
  20 -11  -1   -0.08    0.16
  20 -11  -1   -0.05    0.12
 -20  11   2    2.07    0.31
 -20  11   2    1.99    0.31
 -20  11   2    2.15    0.33
 -20  11   2    1.93    0.31
  20 -11  -2    2.57    0.33
  20 -11  -2    1.72    0.32
 -20  11   3    0.41    0.14
 -20  11   3    0.79    0.18
 -20  11   3    0.42    0.16
 -20  11   3    0.61    0.14
  20 -11  -3    0.55    0.18
  20 -11  -3    0.36    0.16
 -20  11   4    6.99    0.90
 -20  11   4    6.80    0.90
 -20  11   4    6.14    0.91
 -20  11   4    6.17    0.90
  20 -11  -4    7.47    0.92
  20 -11  -4    7.48    0.93
 -20  11   5    3.78    0.53
 -20  11   5    2.86    0.49
  20 -11  -5    4.07    0.52
  20 -11  -5    4.27    0.53
 -20  11   6    4.45    0.62
 -20  11   6    4.75    0.63
 -20  11   7    7.45    1.04
 -20  11   7    9.04    1.06
 -20  11   7    7.55    1.06
 -20  11   7    7.28    1.04
  20 -11  -7    8.22    1.06
  20 -11  -7    8.48    1.07
 -20  11   8    0.84    0.17
 -20  11   8    0.72    0.18
  20 -11  -8    0.73    0.18
  20 -11  -8    0.34    0.17
 -20  11   9   12.34    1.66
 -20  11   9   11.95    1.67
  20 -11  -9   13.21    1.66
  20 -11  -9   13.57    1.68
 -20  11  10   -0.06    0.16
 -20  11  10    0.05    0.15
  20 -11 -10    0.12    0.16
  20 -11 -10   -0.02    0.14
 -20  11  11    8.84    1.13
 -20  11  11    8.47    1.14
  20 -11 -11    8.28    1.13
  20 -11 -11    8.44    1.13
 -20  12   1    0.26    0.12
 -20  12   1   -0.01    0.15
 -20  12   1    0.11    0.13
 -20  12   1    0.09    0.11
  20 -12  -1   -0.02    0.16
  20 -12  -1    0.20    0.16
 -20  12   2   10.17    1.50
 -20  12   2   11.51    1.52
 -20  12   2   11.48    1.53
 -20  12   2   11.75    1.52
  20 -12  -2   12.85    1.53
  20 -12  -2   13.05    1.55
 -20  12   3    0.33    0.14
 -20  12   3    0.61    0.17
 -20  12   3    0.80    0.18
 -20  12   3    0.99    0.15
  20 -12  -3    0.03    0.16
  20 -12  -3    0.53    0.18
 -20  12   4    3.92    0.49
 -20  12   4    3.32    0.45
  20 -12  -4    2.28    0.46
  20 -12  -4    3.85    0.49
 -20  12   5    0.85    0.19
 -20  12   5    0.60    0.22
 -20  12   5    0.96    0.22
 -20  12   5    1.08    0.19
  20 -12  -5    1.16    0.24
  20 -12  -5    1.25    0.24
 -20  12   6   -0.08    0.12
 -20  12   6    0.11    0.14
 -20  12   6    0.17    0.14
 -20  12   6    0.34    0.13
  20 -12  -6    0.02    0.15
  20 -12  -6    0.24    0.14
 -20  12   7    0.43    0.17
 -20  12   7    0.98    0.19
  20 -12  -7    0.48    0.20
  20 -12  -7    0.92    0.21
 -20  12   8    0.27    0.17
 -20  12   8    0.32    0.14
  20 -12  -8   -0.14    0.16
  20 -12  -8    0.26    0.16
 -20  12   9    0.72    0.19
 -20  12   9    0.48    0.17
  20 -12  -9    0.09    0.19
  20 -12  -9    0.44    0.17
 -20  12  10   -0.21    0.15
 -20  12  10    0.13    0.15
  20 -12 -10   -0.07    0.15
  20 -12 -10    0.53    0.16
 -20  13   1    0.92    0.16
 -20  13   1    0.57    0.19
 -20  13   1    0.66    0.19
 -20  13   1    0.57    0.16
  20 -13  -1    0.65    0.19
  20 -13  -1    0.60    0.20
 -20  13   2    2.84    0.38
 -20  13   2    3.08    0.40
 -20  13   2    2.68    0.40
 -20  13   2    2.08    0.38
  20 -13  -2    2.59    0.41
  20 -13  -2    2.67    0.41
 -20  13   3    0.08    0.11
 -20  13   3    0.08    0.12
 -20  13   4    7.73    1.07
 -20  13   4    9.76    1.09
 -20  13   4    8.11    1.09
 -20  13   4    7.35    1.06
  20 -13  -4    8.97    1.09
  20 -13  -4    7.53    1.09
 -20  13   5    0.05    0.12
 -20  13   5    0.36    0.15
 -20  13   5   -0.15    0.14
 -20  13   5    0.29    0.12
  20 -13  -5    0.27    0.18
  20 -13  -5    0.29    0.15
 -20  13   6    9.06    1.12
 -20  13   6    8.43    1.12
  20 -13  -6    7.66    1.12
 -20  13   7    4.25    0.50
 -20  13   7    3.08    0.50
  20 -13  -7    3.69    0.50
  20 -13  -7    2.82    0.51
 -20  13   8    4.41    0.58
 -20  13   8    3.98    0.58
  20 -13  -8    3.90    0.58
  20 -13  -8    3.94    0.58
 -20  13   9    7.16    0.91
 -20  13   9    6.69    0.92
  20 -13  -9    6.58    0.91
  20 -13  -9    6.51    0.92
 -20  14   1    2.21    0.36
 -20  14   1    2.92    0.40
 -20  14   1    2.46    0.37
  20 -14  -1    3.02    0.41
 -20  14   2    6.00    0.78
 -20  14   2    5.61    0.79
 -20  14   2    5.51    0.77
  20 -14  -2    6.27    0.81
 -20  14   3    0.59    0.13
 -20  14   3    0.13    0.16
 -20  14   3    0.16    0.17
 -20  14   3    0.40    0.12
  20 -14  -3    0.69    0.20
  20 -14  -3    0.79    0.18
 -20  14   4    3.16    0.41
 -20  14   4    3.34    0.42
 -20  14   4    2.45    0.39
  20 -14  -4    2.54    0.41
  20 -14  -4    2.31    0.41
 -20  14   5   -0.12    0.15
 -20  14   5   -0.12    0.12
  20 -14  -5   -0.15    0.16
  20 -14  -5    0.16    0.15
 -20  14   6    0.74    0.21
 -20  14   6    1.21    0.24
  20 -14  -6    0.79    0.21
  20 -14  -6    1.32    0.22
 -20  14   7   -0.07    0.17
 -20  14   7    0.28    0.14
  20 -14  -7   -0.40    0.18
 -20  14   8    0.30    0.17
 -20  14   8    0.36    0.16
  20 -14  -8    0.05    0.16
  20 -14  -8    0.40    0.17
 -20  15   1    0.60    0.18
 -20  15   1    1.05    0.23
 -20  15   1    0.95    0.20
 -20  15   1    0.73    0.16
  20 -15  -1    1.06    0.24
  20 -15  -1    1.14    0.22
 -20  15   2    1.96    0.29
 -20  15   2    1.65    0.29
 -20  15   2    1.41    0.25
  20 -15  -2    1.53    0.29
  20 -15  -2    1.47    0.28
 -20  15   3    0.37    0.20
 -20  15   3    0.17    0.17
  20 -15  -3    0.76    0.22
  20 -15  -3    0.95    0.19
 -20  15   4    5.34    0.73
 -20  15   4    4.96    0.72
  20 -15  -4    5.59    0.73
  20 -15  -4    5.06    0.73
 -20  15   5    0.92    0.22
 -20  15   5    0.83    0.19
  20 -15  -5    0.78    0.23
  20 -15  -5    0.49    0.19
 -20  15   6    5.28    0.70
  20 -15  -6    5.42    0.70
  20 -15  -6    4.27    0.69
 -20  15   7    0.43    0.18
  20 -15  -7    0.51    0.19
 -20  16   1    1.48    0.32
 -20  16   1    1.88    0.32
  20 -16  -1    1.83    0.34
  20 -16  -1    2.31    0.34
 -20  16   2    1.46    0.28
 -20  16   2    1.03    0.24
  20 -16  -2    1.19    0.28
  20 -16  -2    1.52    0.26
 -20  16   3    0.92    0.23
 -20  16   3    1.14    0.24
  20 -16  -3    1.05    0.26
  20 -16  -3    1.11    0.23
 -20  16   4    0.88    0.20
  20 -16  -4    0.97    0.22
  20 -16  -4    0.68    0.19
 -20  16   5   -0.33    0.19
 -20  16   5   -0.19    0.14
  20 -16  -5    0.18    0.17
  20 -16  -5   -0.06    0.14
 -20  17   1    0.84    0.23
 -20  17   1    0.84    0.19
  20 -17  -1    0.43    0.23
  20 -17  -1    0.70    0.21
 -20  17   2    1.15    0.23
 -20  17   2    0.76    0.20
  20 -17  -2    0.42    0.21
  20 -17  -2    0.77    0.22
 -20  17   3    1.32    0.27
  20 -17  -3    1.49    0.27
 -20  18   1    1.31    0.27
  20 -18  -1    1.90    0.30
 -19 -14   1    0.00    0.15
  19  14  -1   -0.13    0.14
 -19 -14   2    1.77    0.31
  19  14  -2    2.18    0.32
 -19 -14   3   -0.21    0.15
  19  14  -3   -0.09    0.14
 -19 -14   4    0.90    0.25
  19  14  -4    1.56    0.23
 -19 -13   1    0.52    0.17
  19  13  -1    0.50    0.17
 -19 -13   2    0.88    0.19
  19  13  -2    0.45    0.17
 -19 -13   3   -0.05    0.15
  19  13  -3   -0.18    0.14
 -19 -13   4    0.04    0.15
  19  13  -4   -0.11    0.11
 -19 -13   5    0.11    0.12
  19  13  -5   -0.17    0.14
 -19 -13   6   -0.10    0.12
  19  13  -6    0.09    0.12
 -19 -13   7   -0.32    0.15
  19  13  -7    0.01    0.12
 -19 -12   1    0.11    0.19
 -19 -12   2    2.26    0.34
 -19 -12   2    1.85    0.31
  19  12  -2    1.80    0.29
 -19 -12   3    0.25    0.16
 -19 -12   3    0.16    0.15
  19  12  -3    0.23    0.12
 -19 -12   4    2.44    0.35
  19  12  -4    2.39    0.35
 -19 -12   5   -0.06    0.14
  19  12  -5   -0.30    0.13
 -19 -12   6    3.68    0.50
  19  12  -6    3.46    0.49
 -19 -12   7    0.64    0.16
  19  12  -7    0.55    0.15
 -19 -12   8    3.04    0.46
  19  12  -8    3.57    0.47
 -19 -12   9    1.39    0.25
  19  12  -9    1.23    0.23
 -19 -11   1    0.56    0.18
 -19 -11   1    0.50    0.14
 -19 -11   1    0.50    0.17
  19  11  -1    0.54    0.15
  19  11  -1    0.18    0.12
 -19 -11   2    0.32    0.19
 -19 -11   2    0.54    0.16
 -19 -11   2    0.42    0.18
  19  11  -2    0.63    0.14
  19  11  -2    0.58    0.14
 -19 -11   3    0.14    0.18
 -19 -11   3    0.18    0.17
  19  11  -3    0.24    0.13
  19  11  -3    0.22    0.12
 -19 -11   4    0.22    0.16
 -19 -11   4   -0.19    0.14
  19  11  -4    0.32    0.15
  19  11  -4    0.15    0.11
 -19 -11   5   -0.30    0.16
 -19 -11   5   -0.09    0.13
 -19 -11   5    0.35    0.15
  19  11  -5   -0.24    0.11
  19  11  -5    0.13    0.10
 -19 -11   6    0.18    0.16
 -19 -11   6    0.26    0.15
 -19 -11   6    0.08    0.15
  19  11  -6    0.23    0.12
  19  11  -6    0.15    0.11
 -19 -11   7   -0.01    0.13
 -19 -11   7   -0.05    0.18
  19  11  -7    0.03    0.13
  19  11  -7    0.15    0.12
 -19 -11   8    0.31    0.15
 -19 -11   8    0.56    0.19
  19  11  -8    0.44    0.14
  19  11  -8    0.18    0.11
 -19 -11   9    0.44    0.15
  19  11  -9    0.07    0.12
 -19 -11  10    0.95    0.18
  19  11 -10    0.78    0.18
 -19 -11  11    1.10    0.25
  19  11 -11    1.33    0.22
 -19 -10   1    1.74    0.29
  19  10  -1    1.38    0.24
  19  10  -1    1.66    0.25
 -19 -10   2    1.61    0.27
 -19 -10   2    1.46    0.24
 -19 -10   2    0.87    0.25
  19  10  -2    1.24    0.22
  19  10  -2    1.36    0.22
 -19 -10   3    1.38    0.29
 -19 -10   3    1.69    0.28
 -19 -10   3    1.65    0.30
  19  10  -3    1.92    0.27
  19  10  -3    1.80    0.26
 -19 -10   4    4.04    0.62
 -19 -10   4    4.59    0.60
  19  10  -4    4.71    0.60
  19  10  -4    4.32    0.60
 -19 -10   5    0.77    0.17
 -19 -10   5    0.82    0.19
  19  10  -5    0.35    0.15
  19  10  -5    0.43    0.13
 -19 -10   6    7.54    0.89
 -19 -10   6    6.20    0.86
 -19 -10   6    6.86    0.89
  19  10  -6    5.97    0.85
 -19 -10   7    0.34    0.15
 -19 -10   7   -0.09    0.11
 -19 -10   7   -0.11    0.15
  19  10  -7   -0.05    0.10
  19  10  -7    0.13    0.10
 -19 -10   8    4.84    0.68
 -19 -10   8    5.21    0.72
  19  10  -8    5.24    0.68
  19  10  -8    5.06    0.68
 -19 -10   9    0.50    0.17
 -19 -10   9    0.43    0.21
  19  10  -9    0.85    0.15
  19  10  -9    0.51    0.15
 -19 -10  10    2.90    0.44
 -19 -10  10    3.02    0.48
  19  10 -10    3.38    0.43
  19  10 -10    2.96    0.44
 -19 -10  11    1.21    0.25
 -19 -10  11    1.67    0.30
  19  10 -11    1.74    0.25
  19  10 -11    1.53    0.26
 -19 -10  12    0.98    0.20
  19  10 -12    0.94    0.18
 -19  -9   1    2.27    0.34
 -19  -9   1    2.33    0.36
 -19  -9   1    1.72    0.36
  19   9  -1    2.83    0.33
  19   9  -1    1.90    0.32
 -19  -9   2   -0.05    0.13
 -19  -9   2    0.42    0.14
 -19  -9   2    0.22    0.17
 -19  -9   2    0.30    0.16
  19   9  -2    0.08    0.11
  19   9  -2   -0.07    0.09
 -19  -9   3    0.91    0.23
 -19  -9   3    1.18    0.21
 -19  -9   3    0.91    0.25
 -19  -9   3    1.04    0.23
  19   9  -3    1.53    0.20
  19   9  -3    0.96    0.19
 -19  -9   4    0.02    0.15
 -19  -9   4    0.10    0.12
 -19  -9   4    0.38    0.19
 -19  -9   4   -0.19    0.15
  19   9  -4    0.02    0.10
  19   9  -4    0.17    0.09
 -19  -9   5    0.25    0.15
 -19  -9   5    0.11    0.12
 -19  -9   5    0.18    0.17
 -19  -9   5   -0.12    0.15
  19   9  -5    0.17    0.12
 -19  -9   6    0.20    0.13
 -19  -9   6    0.17    0.12
 -19  -9   6   -0.19    0.16
  19   9  -6   -0.04    0.10
  19   9  -6    0.11    0.11
 -19  -9   7    0.08    0.14
 -19  -9   7    0.60    0.18
  19   9  -7    0.40    0.11
 -19  -9   8    0.70    0.19
 -19  -9   8    0.68    0.16
 -19  -9   8    0.79    0.22
  19   9  -8    0.40    0.14
  19   9  -8    0.78    0.15
 -19  -9   9    0.26    0.15
 -19  -9   9   -0.11    0.13
 -19  -9   9    0.23    0.16
  19   9  -9    0.21    0.11
  19   9  -9   -0.22    0.11
 -19  -9  10    2.33    0.34
 -19  -9  10    2.38    0.37
  19   9 -10    2.14    0.33
  19   9 -10    2.23    0.33
 -19  -9  11    0.54    0.16
 -19  -9  11    0.74    0.20
  19   9 -11    0.43    0.12
  19   9 -11    0.28    0.13
 -19  -9  12    4.27    0.61
 -19  -9  12    4.54    0.65
  19   9 -12    4.66    0.61
  19   9 -12    4.50    0.61
 -19  -9  13    1.44    0.23
 -19  -9  13    0.42    0.25
  19   9 -13    1.13    0.21
  19   9 -13    1.35    0.21
 -19  -8   1    5.52    0.67
 -19  -8   1    4.69    0.65
 -19  -8   1    5.79    0.68
  19   8  -1    4.11    0.64
 -19  -8   2    0.27    0.15
 -19  -8   2    0.27    0.13
 -19  -8   2    0.37    0.19
  19   8  -2    0.11    0.10
 -19  -8   3    5.89    0.78
 -19  -8   3    6.59    0.81
  19   8  -3    5.40    0.77
 -19  -8   4    2.77    0.38
 -19  -8   4    2.25    0.37
 -19  -8   4    2.68    0.41
  19   8  -4    2.62    0.36
 -19  -8   5    5.28    0.81
 -19  -8   5    6.17    0.80
 -19  -8   5    6.49    0.84
 -19  -8   5    5.16    0.83
  19   8  -5    6.85    0.80
 -19  -8   6    6.16    0.81
 -19  -8   6    5.98    0.79
 -19  -8   6    5.25    0.81
 -19  -8   6    6.75    0.84
  19   8  -6    6.27    0.79
  19   8  -6    5.46    0.79
 -19  -8   7    1.67    0.31
 -19  -8   7    1.62    0.29
 -19  -8   7    1.88    0.34
 -19  -8   7    1.60    0.32
  19   8  -7    2.38    0.29
  19   8  -7    2.11    0.29
 -19  -8   8    7.91    1.04
 -19  -8   8    6.47    1.02
 -19  -8   8    8.64    1.06
 -19  -8   8    8.13    1.06
  19   8  -8    7.97    1.02
  19   8  -8    8.30    1.03
 -19  -8   9    0.01    0.16
 -19  -8   9    0.01    0.14
 -19  -8   9    0.12    0.18
  19   8  -9    0.54    0.13
 -19  -8  10    7.81    0.96
 -19  -8  10    6.38    0.93
 -19  -8  10    6.56    0.96
  19   8 -10    7.26    0.93
  19   8 -10    7.52    0.94
 -19  -8  11    0.57    0.14
 -19  -8  11    0.16    0.17
  19   8 -11    0.40    0.12
  19   8 -11    0.17    0.12
 -19  -8  12    3.16    0.50
 -19  -8  12    3.48    0.54
  19   8 -12    3.74    0.49
  19   8 -12    3.85    0.50
 -19  -8  13    0.25    0.15
 -19  -8  13    0.43    0.17
  19   8 -13    0.04    0.13
  19   8 -13    0.51    0.12
 -19  -8  14    0.76    0.21
 -19  -8  14    0.67    0.22
  19   8 -14    1.07    0.19
  19   8 -14    1.26    0.19
 -19  -8  15    0.25    0.15
  19   8 -15    0.17    0.11
 -19  -7   1    3.29    0.48
 -19  -7   1    2.86    0.47
 -19  -7   1    3.30    0.50
 -19  -7   1    2.99    0.49
  19   7  -1    3.84    0.52
  19   7  -1    3.92    0.47
 -19  -7   2   -0.09    0.14
 -19  -7   2    0.05    0.11
 -19  -7   2   -0.24    0.19
 -19  -7   2    0.08    0.17
  19   7  -2    0.12    0.10
  19   7  -2   -0.02    0.09
 -19  -7   3    1.86    0.29
 -19  -7   3    1.71    0.28
 -19  -7   3    1.89    0.31
 -19  -7   3    1.52    0.30
  19   7  -3    1.65    0.27
  19   7  -3    1.91    0.27
 -19  -7   4    0.00    0.11
 -19  -7   4   -0.19    0.17
 -19  -7   4   -0.09    0.15
  19   7  -4    0.04    0.11
  19   7  -4    0.18    0.09
 -19  -7   5    0.33    0.16
 -19  -7   5    0.17    0.13
 -19  -7   5    0.86    0.20
 -19  -7   5    0.36    0.17
  19   7  -5    0.40    0.12
 -19  -7   6    0.17    0.14
 -19  -7   6    0.02    0.12
 -19  -7   6   -0.20    0.16
 -19  -7   6   -0.30    0.15
  19   7  -6   -0.21    0.11
  19   7  -6   -0.08    0.10
 -19  -7   7    0.26    0.15
 -19  -7   7    0.20    0.13
 -19  -7   7   -0.03    0.20
  19   7  -7    0.46    0.11
 -19  -7   8    0.15    0.14
 -19  -7   8    0.27    0.13
 -19  -7   8    0.10    0.17
  19   7  -8    0.14    0.10
 -19  -7   9   -0.07    0.13
 -19  -7   9    0.26    0.13
 -19  -7   9    0.10    0.15
  19   7  -9    0.19    0.12
  19   7  -9   -0.15    0.10
 -19  -7  10    3.20    0.49
  19   7 -10    3.20    0.45
 -19  -7  11   -0.03    0.14
 -19  -7  11    0.22    0.13
 -19  -7  11   -0.27    0.15
  19   7 -11   -0.01    0.10
  19   7 -11    0.10    0.10
 -19  -7  12    8.07    0.98
 -19  -7  12    7.00    1.00
  19   7 -12    7.59    0.97
  19   7 -12    6.80    0.97
 -19  -7  13   -0.10    0.14
 -19  -7  13    0.02    0.15
  19   7 -13   -0.28    0.10
  19   7 -13    0.01    0.09
 -19  -7  14    7.21    0.93
 -19  -7  14    6.54    0.94
  19   7 -14    7.67    0.92
  19   7 -14    6.35    0.92
 -19  -7  15    3.70    0.41
 -19  -7  15    2.82    0.42
  19   7 -15    2.41    0.37
  19   7 -15    2.37    0.38
 -19  -7  16    4.83    0.63
  19   7 -16    4.03    0.58
 -19  -6   1    3.09    0.41
 -19  -6   1    2.21    0.39
 -19  -6   1    3.02    0.43
 -19  -6   1    2.85    0.43
  19   6  -1    2.92    0.39
  19   6  -1    2.84    0.43
  19   6  -1    2.80    0.39
 -19  -6   2    0.46    0.14
 -19  -6   2   -0.03    0.18
 -19  -6   2    0.76    0.20
  19   6  -2    0.21    0.17
  19   6  -2    0.47    0.13
 -19  -6   3    6.27    0.91
 -19  -6   3    6.96    0.91
 -19  -6   3    6.58    0.92
 -19  -6   3    7.29    0.94
  19   6  -3    7.15    0.91
 -19  -6   4    0.34    0.16
 -19  -6   4    0.32    0.14
 -19  -6   4    0.69    0.18
 -19  -6   4    0.18    0.18
  19   6  -4    0.47    0.11
  19   6  -4    0.32    0.12
 -19  -6   5    9.30    1.22
 -19  -6   5    9.91    1.24
 -19  -6   5    9.90    1.26
  19   6  -5    9.78    1.22
  19   6  -5    8.30    1.23
 -19  -6   6    1.69    0.32
 -19  -6   6    1.87    0.29
 -19  -6   6    1.99    0.31
 -19  -6   6    1.52    0.33
  19   6  -6    2.11    0.28
  19   6  -6    1.95    0.29
 -19  -6   7    3.91    0.61
 -19  -6   7    4.59    0.60
 -19  -6   7    4.56    0.62
 -19  -6   7    3.97    0.63
  19   6  -7    4.89    0.60
  19   6  -7    4.50    0.61
 -19  -6   8    3.28    0.56
 -19  -6   8    3.75    0.55
 -19  -6   8    4.55    0.57
 -19  -6   8    3.70    0.58
  19   6  -8    4.23    0.54
  19   6  -8    4.49    0.55
 -19  -6   9    1.32    0.24
 -19  -6   9    1.14    0.22
  19   6  -9    1.33    0.21
 -19  -6  10    6.08    0.85
 -19  -6  10    6.07    0.84
  19   6 -10    6.64    0.83
 -19  -6  11    0.40    0.18
 -19  -6  11    0.88    0.21
  19   6 -11    1.09    0.17
 -19  -6  12    3.67    0.54
 -19  -6  12    3.41    0.52
 -19  -6  12    2.72    0.54
  19   6 -12    4.06    0.51
  19   6 -12    4.09    0.52
  19   6 -12    5.47    0.66
 -19  -6  13   -0.31    0.13
 -19  -6  13    0.14    0.15
  19   6 -13   -0.09    0.10
  19   6 -13   -0.08    0.10
 -19  -6  14    0.87    0.23
 -19  -6  14    1.46    0.27
  19   6 -14    1.44    0.22
  19   6 -14    1.82    0.24
 -19  -6  15    0.60    0.17
 -19  -6  15    0.65    0.18
  19   6 -15    0.42    0.13
  19   6 -15    0.55    0.13
 -19  -6  16   -0.01    0.15
 -19  -6  16   -0.33    0.15
  19   6 -16    0.11    0.11
  19   6 -16   -0.08    0.11
 -19  -6  17   -0.04    0.14
  19   6 -17    0.12    0.11
 -19  -5   1    2.90    0.39
 -19  -5   1    1.91    0.37
 -19  -5   1    1.84    0.40
 -19  -5   1    2.61    0.41
  19   5  -1    3.11    0.37
  19   5  -1    2.90    0.41
  19   5  -1    2.95    0.38
 -19  -5   2    0.26    0.12
 -19  -5   2    0.44    0.14
 -19  -5   2    0.37    0.18
 -19  -5   2    0.15    0.15
  19   5  -2    0.18    0.09
  19   5  -2    0.31    0.17
  19   5  -2    0.17    0.10
 -19  -5   3    1.21    0.23
 -19  -5   3    1.32    0.25
 -19  -5   3    1.26    0.27
  19   5  -3    1.33    0.27
  19   5  -3    1.74    0.23
 -19  -5   4    0.44    0.14
 -19  -5   4    0.08    0.14
 -19  -5   4   -0.34    0.15
 -19  -5   4   -0.09    0.14
  19   5  -4    0.05    0.09
  19   5  -4    0.40    0.18
  19   5  -4    0.01    0.10
 -19  -5   5    0.60    0.15
 -19  -5   5    0.70    0.14
 -19  -5   5    0.66    0.19
 -19  -5   5    0.41    0.19
  19   5  -5    0.39    0.11
  19   5  -5    0.49    0.13
 -19  -5   6    0.00    0.13
 -19  -5   6    0.16    0.13
 -19  -5   6   -0.12    0.15
 -19  -5   6    0.11    0.14
  19   5  -6    0.33    0.11
  19   5  -6    0.02    0.10
 -19  -5   7   -0.17    0.13
 -19  -5   7   -0.03    0.11
 -19  -5   7    0.09    0.14
 -19  -5   7    0.33    0.18
  19   5  -7    0.25    0.11
  19   5  -7    0.39    0.11
 -19  -5   8    0.16    0.12
 -19  -5   8    0.22    0.12
 -19  -5   8    0.05    0.17
 -19  -5   8    0.30    0.14
  19   5  -8    0.28    0.11
  19   5  -8    0.24    0.11
 -19  -5   9    0.23    0.15
  19   5  -9    0.32    0.12
  19   5  -9    0.34    0.11
 -19  -5  10    1.35    0.27
 -19  -5  10    1.76    0.27
 -19  -5  10    1.25    0.29
  19   5 -10    1.95    0.25
  19   5 -10    1.70    0.26
 -19  -5  11    1.20    0.24
 -19  -5  11    1.23    0.23
  19   5 -11    1.44    0.21
 -19  -5  12    5.63    0.79
 -19  -5  12    5.87    0.78
 -19  -5  12    5.74    0.81
  19   5 -12    6.13    0.77
  19   5 -12    5.82    0.78
  19   5 -12    5.01    0.87
 -19  -5  13    0.51    0.16
 -19  -5  13    0.42    0.16
 -19  -5  13    0.35    0.19
  19   5 -13    0.66    0.14
  19   5 -13    0.68    0.15
  19   5 -13   -0.48    0.30
 -19  -5  14    9.43    1.15
 -19  -5  14    8.15    1.16
  19   5 -14    9.23    1.13
  19   5 -14    7.80    1.13
 -19  -5  15    0.36    0.17
 -19  -5  15    0.18    0.18
  19   5 -15    0.47    0.13
  19   5 -15    0.59    0.14
 -19  -5  16    7.54    1.08
 -19  -5  16    8.75    1.12
  19   5 -16    8.68    1.07
  19   5 -16    8.03    1.08
 -19  -5  17    1.89    0.33
  19   5 -17    2.02    0.30
 -19  -4   1    2.97    0.40
 -19  -4   1    2.63    0.39
 -19  -4   1    2.42    0.41
 -19  -4   1    2.46    0.42
  19   4  -1    3.00    0.38
  19   4  -1    3.15    0.43
  19   4  -1    2.50    0.39
 -19  -4   2    1.32    0.23
 -19  -4   2    1.13    0.23
 -19  -4   2    1.35    0.26
  19   4  -2    1.23    0.20
  19   4  -2    1.59    0.27
  19   4  -2    1.42    0.22
 -19  -4   3    8.77    1.24
 -19  -4   3    9.00    1.23
 -19  -4   3    9.33    1.26
  19   4  -3   10.16    1.23
  19   4  -3   10.99    1.27
  19   4  -3    9.07    1.24
 -19  -4   4   -0.03    0.13
 -19  -4   4   -0.03    0.14
  19   4  -4    0.18    0.17
  19   4  -4   -0.05    0.09
 -19  -4   5   10.54    1.31
 -19  -4   5    9.62    1.29
 -19  -4   5    9.12    1.30
 -19  -4   5    9.80    1.32
  19   4  -5    9.70    1.29
  19   4  -5   11.92    1.34
  19   4  -5   10.09    1.30
 -19  -4   6    0.08    0.12
 -19  -4   6   -0.05    0.11
 -19  -4   6    0.42    0.15
 -19  -4   6    0.12    0.14
  19   4  -6    0.27    0.10
  19   4  -6   -0.01    0.09
 -19  -4   7    5.61    0.74
 -19  -4   7    5.00    0.74
 -19  -4   7    5.43    0.77
  19   4  -7    6.00    0.73
  19   4  -7    5.54    0.74
 -19  -4   8    1.78    0.27
 -19  -4   8    1.31    0.24
 -19  -4   8    1.75    0.28
 -19  -4   8    1.78    0.29
  19   4  -8    1.73    0.24
  19   4  -8    1.31    0.24
 -19  -4   9    6.17    0.79
 -19  -4   9    5.64    0.78
 -19  -4   9    5.81    0.80
  19   4  -9    5.85    0.77
  19   4  -9    5.81    0.78
 -19  -4  10    7.20    0.90
 -19  -4  10    6.13    0.87
 -19  -4  10    5.54    0.89
  19   4 -10    7.81    0.89
 -19  -4  11    2.70    0.47
 -19  -4  11    3.31    0.47
 -19  -4  11    3.05    0.48
  19   4 -11    3.72    0.45
  19   4 -11    3.61    0.47
 -19  -4  12    5.79    0.75
  19   4 -12    4.64    0.82
 -19  -4  13    0.48    0.17
 -19  -4  13   -0.03    0.12
 -19  -4  13    0.29    0.18
  19   4 -13    0.18    0.11
  19   4 -13    0.74    0.14
  19   4 -13    1.03    0.35
 -19  -4  14    1.76    0.30
 -19  -4  14    2.37    0.35
  19   4 -14    1.70    0.28
  19   4 -14    2.08    0.30
  19   4 -14    3.07    0.46
 -19  -4  15    0.26    0.14
 -19  -4  15    0.19    0.18
  19   4 -15    0.49    0.11
  19   4 -15    0.32    0.13
 -19  -4  16    0.00    0.15
 -19  -4  16    0.07    0.15
  19   4 -16    0.00    0.10
  19   4 -16   -0.12    0.09
 -19  -4  17    0.09    0.16
 -19  -4  17    0.17    0.16
  19   4 -17    0.43    0.12
  19   4 -17    0.22    0.11
 -19  -4  18    0.69    0.20
  19   4 -18    0.67    0.16
 -19  -3   1    2.51    0.34
 -19  -3   1    1.82    0.31
 -19  -3   1    2.74    0.35
 -19  -3   1    2.23    0.36
  19   3  -1    2.40    0.31
  19   3  -1    2.14    0.36
  19   3  -1    1.74    0.31
 -19  -3   2    1.01    0.20
 -19  -3   2    0.92    0.19
 -19  -3   2    0.78    0.21
 -19  -3   2    0.86    0.22
  19   3  -2    1.06    0.16
  19   3  -2    1.13    0.24
  19   3  -2    1.05    0.19
 -19  -3   3    1.14    0.21
 -19  -3   3    0.73    0.21
 -19  -3   3    1.14    0.22
 -19  -3   3    0.83    0.23
  19   3  -3    1.40    0.18
  19   3  -3    1.15    0.23
  19   3  -3    1.23    0.20
 -19  -3   4    0.44    0.15
 -19  -3   4    0.00    0.14
 -19  -3   4    0.24    0.14
 -19  -3   4    0.22    0.15
  19   3  -4    0.38    0.10
  19   3  -4    1.02    0.18
  19   3  -4    0.31    0.12
 -19  -3   5    0.47    0.15
 -19  -3   5    0.04    0.15
  19   3  -5    0.37    0.17
  19   3  -5    0.40    0.12
 -19  -3   6   -0.16    0.13
 -19  -3   6    0.01    0.11
 -19  -3   6    0.12    0.16
 -19  -3   6    0.16    0.13
  19   3  -6    0.14    0.09
  19   3  -6    0.14    0.10
 -19  -3   7    0.01    0.12
 -19  -3   7   -0.19    0.11
 -19  -3   7   -0.12    0.16
 -19  -3   7    0.15    0.15
  19   3  -7    0.23    0.08
  19   3  -7   -0.12    0.10
 -19  -3   8    0.16    0.11
 -19  -3   8   -0.17    0.14
 -19  -3   8   -0.13    0.12
  19   3  -8   -0.04    0.09
  19   3  -8    0.03    0.09
 -19  -3   9    0.70    0.18
 -19  -3   9    0.84    0.16
 -19  -3   9    0.51    0.18
  19   3  -9    0.76    0.14
  19   3  -9    0.86    0.16
 -19  -3  10    2.08    0.32
 -19  -3  10    1.91    0.30
 -19  -3  10    1.68    0.33
  19   3 -10    2.08    0.29
  19   3 -10    2.12    0.31
 -19  -3  11    4.05    0.61
 -19  -3  11    4.58    0.61
 -19  -3  11    5.11    0.64
  19   3 -11    4.97    0.59
  19   3 -11    3.74    0.60
 -19  -3  12    4.88    0.68
 -19  -3  12    5.16    0.67
 -19  -3  12    5.42    0.71
  19   3 -12    5.30    0.66
  19   3 -12    4.43    0.67
  19   3 -12    3.94    0.82
 -19  -3  13    1.51    0.35
  19   3 -13   12.06    0.73
 -19  -3  14    7.17    0.86
 -19  -3  14    5.93    0.88
  19   3 -14    7.08    0.84
  19   3 -14    5.36    0.84
  19   3 -14    6.61    0.95
 -19  -3  15    0.16    0.13
 -19  -3  15    0.04    0.15
  19   3 -15    0.20    0.10
  19   3 -15   -0.03    0.11
 -19  -3  16    6.04    0.87
 -19  -3  16    6.68    0.90
  19   3 -16    7.28    0.86
  19   3 -16    6.00    0.87
 -19  -3  17   -0.04    0.16
 -19  -3  17    0.08    0.15
  19   3 -17    0.22    0.11
  19   3 -17    0.03    0.10
 -19  -3  18    5.09    0.71
  19   3 -18    4.96    0.68
 -19  -2   1    3.25    0.48
 -19  -2   1    3.53    0.47
 -19  -2   1    3.02    0.46
 -19  -2   1    2.56    0.50
  19   2  -1    3.46    0.45
  19   2  -1    4.04    0.50
  19   2  -1    4.21    0.62
 -19  -2   2    1.54    0.28
 -19  -2   2    1.25    0.26
 -19  -2   2    2.28    0.29
 -19  -2   2    1.70    0.30
  19   2  -2    1.74    0.25
  19   2  -2    1.96    0.30
  19   2  -2    1.81    0.26
  19   2  -2    1.30    0.43
 -19  -2   3    8.79    1.16
 -19  -2   3    8.45    1.15
 -19  -2   3    8.27    1.15
 -19  -2   3    8.11    1.18
  19   2  -3    8.97    1.15
  19   2  -3   11.23    1.20
  19   2  -3    8.94    1.16
 -19  -2   4    0.31    0.13
 -19  -2   4    0.52    0.14
 -19  -2   4    0.24    0.17
 -19  -2   4    0.25    0.16
  19   2  -4    0.54    0.11
  19   2  -4    0.36    0.16
  19   2  -4    0.66    0.14
 -19  -2   5    9.74    1.41
 -19  -2   5   11.12    1.41
 -19  -2   5   10.31    1.43
  19   2  -5   13.00    1.44
  19   2  -5   10.61    1.41
 -19  -2   6    0.13    0.12
 -19  -2   6    0.02    0.12
 -19  -2   6    0.64    0.16
  19   2  -6    0.06    0.09
  19   2  -6    0.23    0.14
  19   2  -6    0.34    0.11
 -19  -2   7   13.21    1.61
 -19  -2   7   12.17    1.59
 -19  -2   7   11.09    1.61
  19   2  -7   13.09    1.59
  19   2  -7   11.75    1.59
 -19  -2   8    0.68    0.19
 -19  -2   8    0.99    0.17
 -19  -2   8    0.84    0.18
 -19  -2   8    0.79    0.20
  19   2  -8    0.64    0.14
  19   2  -8    0.94    0.17
 -19  -2   9   17.18    2.10
 -19  -2   9   14.50    2.07
 -19  -2   9   16.89    2.11
  19   2  -9   16.30    2.07
  19   2  -9   16.41    2.09
 -19  -2  10    4.55    0.60
 -19  -2  10    4.38    0.58
 -19  -2  10    3.37    0.59
  19   2 -10    4.60    0.57
  19   2 -10    4.07    0.58
 -19  -2  11    5.40    0.87
 -19  -2  11    6.31    0.87
 -19  -2  11    6.79    0.90
  19   2 -11    7.20    0.86
  19   2 -11    7.10    0.88
 -19  -2  12    3.70    0.49
 -19  -2  12    2.80    0.46
 -19  -2  12    3.16    0.49
  19   2 -12    3.59    0.45
  19   2 -12    3.29    0.47
  19   2 -12    4.05    0.62
  19   2 -13    0.03    0.41
 -19  -2  14    0.91    0.17
 -19  -2  14    0.57    0.20
  19   2 -14    0.70    0.14
  19   2 -14    0.63    0.16
  19   2 -14    2.25    0.42
 -19  -2  15    0.13    0.13
 -19  -2  15   -0.05    0.15
  19   2 -15    0.07    0.10
  19   2 -15   -0.04    0.09
  19   2 -15   -0.34    0.35
 -19  -2  16   -0.10    0.12
 -19  -2  16   -0.11    0.14
  19   2 -16    0.00    0.10
  19   2 -16    0.10    0.11
 -19  -2  17    0.11    0.15
 -19  -2  17   -0.48    0.14
  19   2 -17    0.19    0.11
  19   2 -17    0.10    0.10
 -19  -2  18    0.19    0.15
  19   2 -18   -0.12    0.10
 -19  -1   1    1.14    0.19
 -19  -1   1    0.80    0.17
 -19  -1   1    1.15    0.20
  19   1  -1    0.81    0.16
  19   1  -1    0.68    0.21
  19   1  -1    1.41    0.38
 -19  -1   2    3.09    0.47
 -19  -1   2    3.52    0.46
 -19  -1   2    3.10    0.46
  19   1  -2    3.44    0.45
  19   1  -2    3.53    0.49
  19   1  -2    3.04    0.60
 -19  -1   3    3.38    0.41
 -19  -1   3    2.88    0.39
 -19  -1   3    2.56    0.39
 -19  -1   3    1.85    0.41
  19   1  -3    2.91    0.38
  19   1  -3    3.68    0.43
  19   1  -3    2.11    0.39
  19   1  -3    3.92    0.58
 -19  -1   4    0.46    0.13
 -19  -1   4    0.04    0.12
 -19  -1   4    0.31    0.14
 -19  -1   4    0.73    0.17
  19   1  -4    0.29    0.11
  19   1  -4    0.46    0.16
  19   1  -4    0.45    0.13
  19   1  -4    0.31    0.43
 -19  -1   5    1.43    0.22
 -19  -1   5    0.98    0.21
 -19  -1   5    1.29    0.21
 -19  -1   5    0.87    0.24
  19   1  -5    1.09    0.19
  19   1  -5    1.29    0.24
  19   1  -5    1.15    0.21
 -19  -1   6    0.09    0.13
 -19  -1   6   -0.01    0.12
 -19  -1   6   -0.03    0.14
  19   1  -6    0.32    0.16
  19   1  -6    0.15    0.10
 -19  -1   7    0.17    0.12
 -19  -1   7    0.46    0.14
 -19  -1   7    0.08    0.13
  19   1  -7    0.23    0.09
  19   1  -7   -0.20    0.10
 -19  -1   8    0.07    0.12
 -19  -1   8    0.03    0.13
 -19  -1   8   -0.26    0.13
  19   1  -8   -0.10    0.10
  19   1  -8    0.03    0.10
 -19  -1   9    3.95    0.50
 -19  -1   9    3.44    0.52
  19   1  -9    3.32    0.49
 -19  -1  10    1.12    0.25
 -19  -1  10    1.17    0.24
 -19  -1  10    2.38    0.30
  19   1 -10    1.77    0.22
  19   1 -10    1.12    0.23
 -19  -1  11    8.59    1.14
 -19  -1  11    8.04    1.12
 -19  -1  11   10.06    1.17
  19   1 -11    8.83    1.12
  19   1 -11    8.24    1.13
 -19  -1  12    3.48    0.45
 -19  -1  12    3.47    0.43
 -19  -1  12    3.53    0.46
  19   1 -12    2.97    0.41
  19   1 -12    2.04    0.41
  19   1 -12    3.75    0.61
 -19  -1  13    2.58    0.44
 -19  -1  13    3.57    0.48
  19   1 -13    3.48    0.43
  19   1 -13    2.88    0.44
  19   1 -13    3.60    0.58
 -19  -1  14    4.84    0.66
 -19  -1  14    4.83    0.71
  19   1 -14    5.19    0.65
  19   1 -14    5.08    0.67
  19   1 -14    3.55    0.75
 -19  -1  15    0.45    0.16
 -19  -1  15    0.79    0.20
  19   1 -15    0.70    0.14
  19   1 -15    0.82    0.15
  19   1 -15   -0.10    0.36
 -19  -1  16    7.28    0.93
 -19  -1  16    7.93    0.97
  19   1 -16    6.41    0.91
 -19  -1  17   -0.06    0.15
 -19  -1  17   -0.14    0.14
  19   1 -17   -0.05    0.11
  19   1 -17   -0.12    0.10
 -19  -1  18    6.97    0.85
 -19  -1  18    5.60    0.85
  19   1 -18    6.24    0.83
  19   1 -18    6.13    0.84
 -19  -1  19    0.95    0.23
 -19   0   1    1.76    0.28
 -19   0   1    1.40    0.26
 -19   0   1    1.46    0.26
 -19   0   1    1.98    0.32
  19   0  -1    1.97    0.25
  19   0  -1    1.64    0.30
  19   0  -1    1.71    0.27
  19   0  -1    2.53    0.52
 -19   0   2    5.58    0.75
 -19   0   2    4.89    0.73
  19   0  -2    6.35    0.74
  19   0  -2    6.63    0.77
  19   0  -2    4.98    0.74
  19   0  -2    4.70    0.88
 -19   0   3    7.56    1.04
  19   0  -3    7.94    1.04
  19   0  -3    9.09    1.08
  19   0  -3    7.75    1.17
 -19   0   4    9.23    1.39
 -19   0   4   10.56    1.39
 -19   0   4   10.62    1.38
 -19   0   4   10.28    1.42
  19   0  -4   11.11    1.38
  19   0  -4   12.46    1.42
  19   0  -4   10.66    1.40
  19   0  -4   11.53    1.52
 -19   0   5   13.74    1.93
 -19   0   5   14.30    1.92
 -19   0   5   14.76    1.92
 -19   0   5   14.28    1.95
  19   0  -5   15.61    1.93
  19   0  -5   17.40    1.96
  19   0  -5   14.71    1.94
  19   0  -5   15.92    2.06
 -19   0   6    4.83    0.68
 -19   0   6    5.08    0.67
 -19   0   6    6.26    0.72
  19   0  -6    4.27    0.68
  19   0  -6    5.16    0.68
 -19   0   7   21.03    2.66
 -19   0   7   19.04    2.68
  19   0  -7   20.84    2.66
  19   0  -7   21.05    2.68
  19   0  -7   21.27    2.68
 -19   0   8    0.21    0.14
 -19   0   8    0.02    0.11
 -19   0   8   -0.07    0.15
  19   0  -8    0.16    0.10
  19   0  -8    0.09    0.10
 -19   0   9   22.50    3.02
 -19   0   9   22.90    3.05
  19   0  -9   24.61    3.03
  19   0  -9   24.23    3.04
 -19   0  10    1.30    0.21
 -19   0  10    0.98    0.19
 -19   0  10    0.79    0.22
  19   0 -10    0.97    0.17
  19   0 -10    1.26    0.20
 -19   0  11    8.06    1.10
 -19   0  11    7.96    1.09
 -19   0  11    8.90    1.13
  19   0 -11    8.58    1.08
  19   0 -11    8.33    1.10
 -19   0  12    1.12    0.22
 -19   0  12    1.18    0.20
 -19   0  12    0.88    0.22
  19   0 -12    1.08    0.18
  19   0 -12    0.91    0.19
  19   0 -12    1.16    0.30
 -19   0  13    1.56    0.23
 -19   0  13    0.79    0.25
  19   0 -13    1.12    0.20
  19   0 -13    1.46    0.23
  19   0 -13    1.17    0.30
 -19   0  14    0.63    0.17
  19   0 -14    0.92    0.16
  19   0 -14    0.91    0.26
 -19   0  15    0.14    0.13
  19   0 -15    0.19    0.11
  19   0 -15    0.36    0.12
  19   0 -15    0.77    0.23
 -19   0  16    0.11    0.15
 -19   0  16    0.03    0.15
  19   0 -16   -0.04    0.10
 -19   0  17   -0.04    0.13
 -19   0  17   -0.08    0.16
  19   0 -17    0.09    0.12
  19   0 -17    0.20    0.11
 -19   0  18    0.25    0.15
 -19   0  18    0.16    0.17
  19   0 -18    0.20    0.12
  19   0 -18    0.12    0.12
 -19   0  19    0.04    0.16
  19   0 -19   -0.03    0.12
 -19   1   1    0.49    0.14
 -19   1   1    0.15    0.12
 -19   1   1    0.23    0.12
 -19   1   1    0.14    0.17
  19  -1  -1    0.00    0.10
  19  -1  -1    0.00    0.14
  19  -1  -1    0.19    0.12
  19  -1  -1    0.76    0.41
 -19   1   2   11.10    1.43
 -19   1   2    9.96    1.41
 -19   1   2   10.33    1.41
 -19   1   2   11.54    1.45
  19  -1  -2   10.93    1.41
  19  -1  -2   11.34    1.43
  19  -1  -2   11.29    1.43
  19  -1  -2   13.03    1.54
 -19   1   3    3.20    0.40
 -19   1   3    2.62    0.38
 -19   1   3    2.70    0.37
 -19   1   3    1.92    0.40
  19  -1  -3    2.68    0.37
  19  -1  -3    2.88    0.41
 -19   1   4    2.21    0.32
 -19   1   4    2.04    0.31
 -19   1   4    1.64    0.29
  19  -1  -4    2.24    0.30
  19  -1  -4    2.01    0.32
  19  -1  -4    3.20    0.54
 -19   1   5    1.89    0.23
 -19   1   5    1.17    0.20
 -19   1   5    1.12    0.20
 -19   1   5    0.93    0.23
  19  -1  -5    1.07    0.19
  19  -1  -5    1.26    0.24
  19  -1  -5    1.10    0.22
  19  -1  -5    1.64    0.42
 -19   1   6   -0.05    0.13
 -19   1   6   -0.08    0.10
 -19   1   6    0.24    0.14
  19  -1  -6    0.00    0.15
  19  -1  -6    0.04    0.11
 -19   1   7    0.47    0.16
 -19   1   7    0.59    0.16
 -19   1   7    0.62    0.15
 -19   1   7    0.26    0.17
  19  -1  -7    0.84    0.14
  19  -1  -7    0.80    0.19
  19  -1  -7    0.53    0.15
 -19   1   8    0.40    0.13
 -19   1   8    0.20    0.11
 -19   1   8    0.22    0.15
  19  -1  -8    0.12    0.11
  19  -1  -8    0.32    0.12
 -19   1   9    5.57    0.66
 -19   1   9    4.52    0.69
  19  -1  -9    5.02    0.65
  19  -1  -9    4.43    0.66
 -19   1  10    0.06    0.12
 -19   1  10    0.20    0.13
 -19   1  10    0.30    0.15
  19  -1 -10    0.07    0.11
  19  -1 -10    0.04    0.10
 -19   1  11    8.67    1.13
 -19   1  11    8.68    1.11
 -19   1  11    7.63    1.13
  19  -1 -11    9.01    1.11
  19  -1 -11    8.17    1.12
 -19   1  12    1.11    0.18
 -19   1  12    0.49    0.20
  19  -1 -12    0.84    0.16
  19  -1 -12    0.86    0.17
  19  -1 -12    0.55    0.20
 -19   1  13    6.27    0.87
 -19   1  13    6.30    0.90
  19  -1 -13    7.37    0.87
  19  -1 -13    6.74    0.88
  19  -1 -13    6.08    0.87
 -19   1  14    3.01    0.44
  19  -1 -14    3.02    0.43
  19  -1 -14    3.14    0.44
 -19   1  15    6.43    0.81
  19  -1 -15    5.92    0.79
  19  -1 -15    5.86    0.80
  19  -1 -15    5.87    0.80
 -19   1  16   10.31    1.34
 -19   1  16   10.33    1.38
  19  -1 -16   11.05    1.34
  19  -1 -16    9.28    1.34
 -19   1  17    1.32    0.21
 -19   1  17    0.81    0.21
  19  -1 -17    0.90    0.17
  19  -1 -17    0.73    0.18
 -19   1  18   10.35    1.32
 -19   1  18   10.16    1.36
  19  -1 -18    9.94    1.31
  19  -1 -18    9.81    1.32
 -19   2   1    0.32    0.13
 -19   2   1    0.00    0.13
 -19   2   1    0.40    0.12
 -19   2   1    0.47    0.18
  19  -2  -1    0.20    0.11
  19  -2  -1    0.23    0.14
  19  -2  -1    0.27    0.12
  19  -2  -1    0.42    0.46
 -19   2   2   14.39    1.95
 -19   2   2   15.24    1.95
 -19   2   2   14.42    1.94
 -19   2   2   14.63    1.97
  19  -2  -2   15.35    1.95
  19  -2  -2   16.40    1.97
  19  -2  -2   14.43    1.96
  19  -2  -2   17.28    2.02
 -19   2   3    0.55    0.13
 -19   2   3    0.02    0.13
 -19   2   3    0.15    0.11
 -19   2   3    0.05    0.14
  19  -2  -3    0.28    0.11
  19  -2  -3    0.32    0.15
  19  -2  -3   -0.02    0.10
  19  -2  -3    0.54    0.28
 -19   2   4   29.48    3.74
 -19   2   4   28.78    3.73
 -19   2   4   28.94    3.73
  19  -2  -4   28.15    3.72
  19  -2  -4   30.12    3.75
  19  -2  -4   29.23    3.75
 -19   2   5    6.96    0.93
 -19   2   5    7.75    0.93
 -19   2   5    6.93    0.92
 -19   2   5    5.74    0.94
  19  -2  -5    6.68    0.91
  19  -2  -5    8.47    0.95
  19  -2  -5    6.60    0.95
 -19   2   6   18.06    2.29
 -19   2   6   16.18    2.27
 -19   2   6   17.20    2.31
  19  -2  -6   18.11    2.30
  19  -2  -6   19.91    2.31
 -19   2   7   22.03    2.74
 -19   2   7   20.30    2.72
 -19   2   7   21.47    2.72
 -19   2   7   20.32    2.74
  19  -2  -7   20.63    2.71
  19  -2  -7   20.83    2.74
  19  -2  -7   22.89    2.75
 -19   2   8    2.44    0.39
 -19   2   8    2.50    0.38
 -19   2   8    2.30    0.39
 -19   2   8    3.26    0.42
  19  -2  -8    3.22    0.40
 -19   2   9   22.91    3.04
 -19   2   9   23.31    3.08
  19  -2  -9   23.94    3.05
  19  -2  -9   24.77    3.07
 -19   2  10    0.36    0.14
 -19   2  10    0.09    0.13
 -19   2  10    0.41    0.17
  19  -2 -10    0.57    0.12
  19  -2 -10    0.32    0.13
 -19   2  11   10.13    1.32
 -19   2  11    9.59    1.31
 -19   2  11    9.78    1.34
  19  -2 -11   10.26    1.31
  19  -2 -11   10.78    1.33
 -19   2  12    0.49    0.14
 -19   2  12    0.53    0.17
  19  -2 -12    0.31    0.13
  19  -2 -12   -0.12    0.11
  19  -2 -12    0.21    0.17
 -19   2  13    2.62    0.40
 -19   2  13    3.29    0.44
  19  -2 -13    2.45    0.39
  19  -2 -13    3.68    0.42
  19  -2 -13    2.62    0.41
 -19   2  14    0.49    0.17
  19  -2 -14    0.54    0.14
  19  -2 -14    0.84    0.19
 -19   2  15    0.80    0.17
  19  -2 -15    0.57    0.14
  19  -2 -15    0.62    0.22
  19  -2 -15    0.48    0.16
  19  -2 -15    0.78    0.19
 -19   2  16   -0.11    0.14
 -19   2  16    0.22    0.15
  19  -2 -16    0.44    0.12
  19  -2 -16    0.20    0.11
 -19   2  17   -0.04    0.14
  19  -2 -17    0.15    0.11
  19  -2 -17    0.26    0.12
 -19   2  18    0.62    0.18
 -19   2  18    0.30    0.15
  19  -2 -18    0.65    0.16
  19  -2 -18    0.43    0.14
 -19   3   1    0.43    0.13
 -19   3   1    0.03    0.13
 -19   3   1    0.32    0.12
 -19   3   1    0.40    0.16
  19  -3  -1    0.52    0.13
  19  -3  -1    0.22    0.14
  19  -3  -1    0.50    0.13
  19  -3  -1    0.53    0.26
 -19   3   2   13.40    1.74
 -19   3   2   13.16    1.73
 -19   3   2   13.41    1.73
 -19   3   2   12.93    1.75
  19  -3  -2   12.69    1.72
  19  -3  -2   14.19    1.75
  19  -3  -2   14.18    1.75
  19  -3  -2   13.28    1.74
 -19   3   3    0.99    0.15
 -19   3   3    0.63    0.13
 -19   3   3    0.11    0.11
 -19   3   3    0.42    0.16
  19  -3  -3    0.37    0.12
  19  -3  -3    0.10    0.15
  19  -3  -3    0.09    0.13
  19  -3  -3    0.33    0.17
 -19   3   4    3.45    0.48
  19  -3  -4    3.56    0.47
  19  -3  -4    3.28    0.50
  19  -3  -4    3.67    0.50
 -19   3   5    0.10    0.11
 -19   3   5    0.24    0.11
 -19   3   5    0.25    0.11
  19  -3  -5    0.05    0.11
  19  -3  -5    0.13    0.14
 -19   3   6    0.23    0.12
 -19   3   6    0.27    0.15
  19  -3  -6    0.44    0.15
  19  -3  -6    0.02    0.11
 -19   3   7    0.45    0.14
 -19   3   7    0.52    0.14
 -19   3   7    0.21    0.13
 -19   3   7    0.61    0.18
  19  -3  -7    0.36    0.11
  19  -3  -7    0.69    0.18
  19  -3  -7    0.09    0.13
 -19   3   8    0.25    0.13
 -19   3   8    0.38    0.13
 -19   3   8    0.04    0.14
 -19   3   8    0.23    0.15
  19  -3  -8    0.48    0.13
  19  -3  -8    0.23    0.12
 -19   3   9    3.73    0.47
 -19   3   9    3.25    0.50
  19  -3  -9    3.40    0.46
  19  -3  -9    3.04    0.47
 -19   3  10   -0.02    0.14
 -19   3  10   -0.15    0.12
 -19   3  10    0.14    0.15
  19  -3 -10    0.19    0.12
  19  -3 -10    0.11    0.11
 -19   3  11   10.22    1.33
 -19   3  11   10.40    1.32
 -19   3  11    9.93    1.35
  19  -3 -11   10.55    1.32
  19  -3 -11    9.40    1.32
 -19   3  12    0.26    0.13
 -19   3  12   -0.31    0.15
  19  -3 -12    0.06    0.10
  19  -3 -12    0.16    0.11
  19  -3 -12   -0.12    0.14
 -19   3  13   14.59    1.77
 -19   3  13   13.36    1.79
  19  -3 -13   12.83    1.75
  19  -3 -13   13.91    1.78
  19  -3 -13   13.39    1.76
 -19   3  14    1.51    0.22
 -19   3  14    1.10    0.26
  19  -3 -14    1.01    0.20
  19  -3 -14    0.81    0.21
  19  -3 -14    1.10    0.21
 -19   3  15   12.18    1.54
  19  -3 -15   11.85    1.53
  19  -3 -15   12.94    1.57
  19  -3 -15   11.06    1.54
  19  -3 -15   11.44    1.54
 -19   3  16    5.52    0.73
 -19   3  16    6.44    0.79
  19  -3 -16    5.47    0.73
  19  -3 -16    4.91    0.74
 -19   3  17    6.39    0.77
 -19   3  17    4.96    0.80
  19  -3 -17    6.45    0.78
  19  -3 -17    5.07    0.77
 -19   3  18    6.24    0.86
 -19   3  18    7.26    0.90
  19  -3 -18    6.01    0.86
  19  -3 -18    6.60    0.87
 -19   4   1    2.14    0.38
 -19   4   1    2.68    0.38
 -19   4   1    2.68    0.38
 -19   4   1    3.18    0.42
  19  -4  -1    3.14    0.38
  19  -4  -1    2.46    0.39
  19  -4  -1    2.75    0.40
  19  -4  -1    2.80    0.40
 -19   4   2   13.66    1.82
 -19   4   2   15.37    1.82
 -19   4   2   14.22    1.82
 -19   4   2   12.89    1.83
  19  -4  -2   13.82    1.81
  19  -4  -2   13.91    1.82
  19  -4  -2   13.86    1.83
  19  -4  -2   14.35    1.82
 -19   4   3    1.63    0.24
 -19   4   3    0.96    0.20
 -19   4   3    1.22    0.22
 -19   4   3    1.58    0.26
  19  -4  -3    1.02    0.21
  19  -4  -3    1.37    0.23
  19  -4  -3    1.56    0.23
  19  -4  -3    1.14    0.23
 -19   4   4   23.85    3.18
 -19   4   4   23.99    3.17
 -19   4   4   24.55    3.18
  19  -4  -4   26.80    3.19
 -19   4   5    1.71    0.25
 -19   4   5    1.61    0.23
 -19   4   5    1.21    0.23
 -19   4   5    1.28    0.27
  19  -4  -5    1.14    0.22
  19  -4  -5    1.77    0.25
 -19   4   6   21.35    2.87
 -19   4   6   22.17    2.87
 -19   4   6   23.15    2.91
  19  -4  -6   22.14    2.88
  19  -4  -6   23.17    2.89
 -19   4   7   10.38    1.31
 -19   4   7    9.88    1.29
 -19   4   7    9.54    1.30
 -19   4   7    9.52    1.32
  19  -4  -7    9.82    1.29
  19  -4  -7   10.95    1.32
 -19   4   8   12.94    1.75
 -19   4   8   13.42    1.74
 -19   4   8   13.95    1.78
  19  -4  -8   13.24    1.74
  19  -4  -8   14.12    1.76
 -19   4   9   11.84    1.46
 -19   4   9   11.19    1.49
  19  -4  -9   11.42    1.46
  19  -4  -9   10.38    1.47
 -19   4  10    7.46    1.02
 -19   4  10    7.10    1.01
 -19   4  10    8.01    1.05
  19  -4 -10    7.87    1.01
  19  -4 -10    8.56    1.03
 -19   4  11    5.26    0.66
 -19   4  11    4.26    0.69
  19  -4 -11    4.95    0.66
  19  -4 -11    5.01    0.68
 -19   4  12    0.21    0.12
 -19   4  12    0.13    0.15
  19  -4 -12    0.30    0.12
  19  -4 -12    0.50    0.13
 -19   4  13    4.00    0.62
  19  -4 -13    3.96    0.61
  19  -4 -13    5.66    0.64
  19  -4 -13    4.96    0.62
 -19   4  14    0.23    0.12
 -19   4  14    0.16    0.14
  19  -4 -14   -0.04    0.11
  19  -4 -14   -0.11    0.12
  19  -4 -14    0.05    0.11
 -19   4  15    1.48    0.26
 -19   4  15    2.01    0.30
  19  -4 -15    1.58    0.26
  19  -4 -15    1.60    0.27
  19  -4 -15    1.68    0.27
 -19   4  16    0.10    0.12
  19  -4 -16    0.15    0.13
  19  -4 -16    0.52    0.14
 -19   4  17   -0.08    0.16
  19  -4 -17    0.09    0.12
  19  -4 -17    0.01    0.11
 -19   4  18    0.21    0.12
  19  -4 -18    0.11    0.12
 -19   5   1    1.36    0.26
 -19   5   1    1.71    0.26
 -19   5   1    1.51    0.26
 -19   5   1    1.62    0.29
  19  -5  -1    1.79    0.26
  19  -5  -1    1.75    0.27
  19  -5  -1    1.68    0.27
  19  -5  -1    1.85    0.28
 -19   5   2    7.16    0.94
 -19   5   2    6.90    0.93
 -19   5   2    6.49    0.93
 -19   5   2    6.95    0.96
  19  -5  -2    6.81    0.93
  19  -5  -2    7.07    0.94
  19  -5  -2    8.04    0.96
  19  -5  -2    7.85    0.95
 -19   5   3    0.35    0.14
 -19   5   3    0.07    0.11
 -19   5   3    0.30    0.12
 -19   5   3    0.16    0.15
  19  -5  -3    0.46    0.13
  19  -5  -3    0.41    0.13
  19  -5  -3    0.22    0.12
  19  -5  -3    0.22    0.13
 -19   5   4    2.96    0.39
 -19   5   4    2.14    0.36
 -19   5   4    2.47    0.38
  19  -5  -4    2.71    0.37
  19  -5  -4    2.67    0.39
  19  -5  -4    3.24    0.39
 -19   5   5    1.75    0.24
 -19   5   5    1.42    0.22
 -19   5   5    1.48    0.27
  19  -5  -5    1.14    0.22
  19  -5  -5    1.15    0.24
 -19   5   6   -0.03    0.11
 -19   5   6   -0.03    0.10
 -19   5   6    0.18    0.11
 -19   5   6    0.08    0.14
  19  -5  -6    0.18    0.11
  19  -5  -6    0.03    0.14
  19  -5  -6    0.02    0.11
 -19   5   7    0.16    0.13
 -19   5   7    0.03    0.11
 -19   5   7   -0.18    0.11
 -19   5   7    0.04    0.14
  19  -5  -7   -0.27    0.10
 -19   5   8    0.19    0.14
 -19   5   8    0.31    0.11
 -19   5   8    0.21    0.15
  19  -5  -8    0.15    0.12
  19  -5  -8    0.21    0.13
 -19   5   9    0.74    0.19
 -19   5   9    0.83    0.16
 -19   5   9    0.98    0.20
  19  -5  -9    0.79    0.16
  19  -5  -9    0.61    0.17
 -19   5  10    1.33    0.24
 -19   5  10    1.67    0.22
 -19   5  10    0.79    0.24
  19  -5 -10    1.39    0.22
  19  -5 -10    1.38    0.24
 -19   5  11    6.43    0.74
  19  -5 -11    5.47    0.73
  19  -5 -11    4.63    0.74
 -19   5  12    3.90    0.50
 -19   5  12    3.40    0.52
  19  -5 -12    3.36    0.49
  19  -5 -12    3.67    0.51
  19  -5 -13   11.51    1.50
 -19   5  14    0.17    0.12
 -19   5  14   -0.14    0.15
  19  -5 -14   -0.09    0.11
  19  -5 -14    0.18    0.12
  19  -5 -14   -0.06    0.13
 -19   5  15   14.01    1.62
 -19   5  15   11.17    1.63
  19  -5 -15   13.18    1.61
  19  -5 -15   10.96    1.61
 -19   5  16    0.76    0.17
 -19   5  16    0.64    0.19
  19  -5 -16    0.61    0.17
  19  -5 -16    0.64    0.17
 -19   5  17    7.10    0.90
 -19   5  17    7.32    0.93
  19  -5 -17    6.09    0.90
  19  -5 -17    6.98    0.92
 -19   6   1    6.80    0.97
 -19   6   1    7.30    0.97
 -19   6   1    7.19    0.98
 -19   6   1    7.61    1.01
  19  -6  -1    7.40    0.98
  19  -6  -1    7.43    0.98
  19  -6  -1    7.83    1.00
  19  -6  -1    8.34    0.99
 -19   6   2    9.66    1.21
 -19   6   2   10.21    1.20
 -19   6   2    8.25    1.19
 -19   6   2    9.02    1.22
  19  -6  -2    9.60    1.20
  19  -6  -2    8.90    1.20
  19  -6  -2    9.04    1.21
  19  -6  -2    8.86    1.20
 -19   6   3    2.08    0.31
 -19   6   3    1.69    0.34
  19  -6  -3    1.99    0.31
  19  -6  -3    2.24    0.32
  19  -6  -3    2.44    0.33
  19  -6  -3    2.12    0.32
 -19   6   4   16.76    2.18
 -19   6   4   16.97    2.18
 -19   6   4   16.58    2.18
  19  -6  -4   16.41    2.17
  19  -6  -4   18.13    2.19
  19  -6  -4   16.67    2.18
 -19   6   5   -0.21    0.11
 -19   6   5   -0.12    0.11
 -19   6   5    0.40    0.14
  19  -6  -5    0.30    0.12
  19  -6  -5   -0.04    0.11
 -19   6   6   18.21    2.37
 -19   6   6   19.16    2.37
 -19   6   6   16.74    2.36
 -19   6   6   18.13    2.41
  19  -6  -6   18.00    2.36
  19  -6  -6   18.87    2.38
  19  -6  -6   20.18    2.40
 -19   6   7    0.55    0.16
 -19   6   7    0.73    0.15
 -19   6   7    0.71    0.15
  19  -6  -7    0.44    0.15
  19  -6  -7    0.69    0.17
 -19   6   8   14.83    1.97
  19  -6  -8   15.27    1.98
  19  -6  -8   16.13    2.00
 -19   6   9    1.35    0.24
 -19   6   9    1.43    0.21
 -19   6   9    0.86    0.22
  19  -6  -9    1.28    0.21
  19  -6  -9    1.56    0.24
 -19   6  10   13.15    1.64
 -19   6  10   12.02    1.61
 -19   6  10   11.85    1.65
  19  -6 -10   12.13    1.61
  19  -6 -10   13.60    1.64
 -19   6  11    2.30    0.32
 -19   6  11    2.32    0.36
  19  -6 -11    1.92    0.32
  19  -6 -11    2.28    0.34
 -19   6  12    0.84    0.20
 -19   6  12    1.04    0.25
  19  -6 -12    1.08    0.20
  19  -6 -12    1.21    0.21
 -19   6  13    2.82    0.46
 -19   6  13    4.06    0.52
  19  -6 -13    2.90    0.47
  19  -6 -13    4.28    0.51
  19  -6 -13    3.94    0.49
 -19   6  14    0.33    0.14
 -19   6  14    0.09    0.14
  19  -6 -14    0.06    0.13
  19  -6 -14    0.06    0.16
  19  -6 -14    0.06    0.13
  19  -6 -14    0.16    0.14
 -19   6  15    0.95    0.23
 -19   6  15    1.41    0.25
  19  -6 -15    1.42    0.23
  19  -6 -15    1.43    0.24
 -19   6  16    0.30    0.14
 -19   6  16    0.07    0.15
  19  -6 -16   -0.19    0.12
  19  -6 -16   -0.06    0.12
 -19   6  17    0.55    0.15
 -19   6  17    0.11    0.14
  19  -6 -17    0.34    0.14
  19  -6 -17    0.38    0.13
 -19   7   1    2.34    0.31
 -19   7   1    1.91    0.31
 -19   7   1    1.92    0.31
  19  -7  -1    2.38    0.32
  19  -7  -1    1.99    0.32
  19  -7  -1    2.42    0.33
  19  -7  -1    1.80    0.32
 -19   7   2    4.20    0.56
 -19   7   2    4.08    0.56
 -19   7   2    3.74    0.56
  19  -7  -2    3.84    0.56
  19  -7  -2    4.62    0.57
  19  -7  -2    4.50    0.58
  19  -7  -2    4.31    0.57
 -19   7   3    2.01    0.29
 -19   7   3    1.71    0.28
 -19   7   3    2.04    0.29
  19  -7  -3    1.93    0.29
  19  -7  -3    1.96    0.30
  19  -7  -3    1.72    0.30
 -19   7   4    1.28    0.22
 -19   7   4    1.27    0.23
  19  -7  -4    1.20    0.23
  19  -7  -4    1.63    0.24
  19  -7  -4    1.33    0.23
 -19   7   5    0.62    0.18
 -19   7   5    0.66    0.16
  19  -7  -5    1.01    0.16
  19  -7  -5    0.54    0.16
  19  -7  -5    1.00    0.18
 -19   7   6    0.07    0.12
 -19   7   6    0.13    0.10
 -19   7   6   -0.02    0.15
 -19   7   6   -0.06    0.11
  19  -7  -6    0.13    0.11
  19  -7  -6    0.17    0.12
 -19   7   7    0.46    0.14
 -19   7   7    0.31    0.14
 -19   7   7    0.44    0.17
  19  -7  -7    0.57    0.15
  19  -7  -7    0.60    0.16
 -19   7   8    0.24    0.12
 -19   7   8    0.44    0.11
 -19   7   8    0.40    0.16
 -19   7   8    0.02    0.11
  19  -7  -8    0.10    0.12
  19  -7  -8   -0.06    0.11
 -19   7   9   -0.11    0.11
 -19   7   9    0.08    0.11
 -19   7   9    0.27    0.17
  19  -7  -9    0.32    0.12
  19  -7  -9    0.30    0.13
 -19   7  10    4.75    0.54
 -19   7  10    3.52    0.57
  19  -7 -10    3.78    0.54
  19  -7 -10    3.61    0.55
 -19   7  11    3.40    0.44
 -19   7  11    3.44    0.48
  19  -7 -11    2.97    0.44
  19  -7 -11    2.85    0.45
 -19   7  13    7.89    1.06
 -19   7  13    8.23    1.08
  19  -7 -13    8.61    1.06
  19  -7 -13    7.41    1.07
  19  -7 -13    8.03    1.06
 -19   7  14    0.30    0.15
 -19   7  14    0.35    0.15
  19  -7 -14    0.34    0.14
  19  -7 -14    0.37    0.14
 -19   7  15    8.44    1.10
 -19   7  15    8.43    1.12
  19  -7 -15    8.90    1.10
  19  -7 -15    7.61    1.11
 -19   7  16   -0.03    0.12
 -19   7  16    0.23    0.14
  19  -7 -16    0.50    0.14
  19  -7 -16   -0.05    0.11
 -19   8   1    9.39    1.31
 -19   8   1   11.14    1.32
 -19   8   1   10.17    1.34
 -19   8   1    9.47    1.31
  19  -8  -1   10.40    1.32
  19  -8  -1    9.56    1.31
  19  -8  -1   10.47    1.33
  19  -8  -1   10.60    1.33
 -19   8   2    6.33    0.70
 -19   8   2    6.31    0.70
 -19   8   2    5.32    0.72
 -19   8   2    4.24    0.68
  19  -8  -2    5.14    0.69
  19  -8  -2    5.08    0.69
  19  -8  -2    4.23    0.69
  19  -8  -2    5.13    0.70
 -19   8   3    3.30    0.43
 -19   8   3    2.95    0.43
  19  -8  -3    2.70    0.43
  19  -8  -3    3.43    0.45
 -19   8   4   11.90    1.58
 -19   8   4   13.19    1.58
  19  -8  -4   11.62    1.58
  19  -8  -4   11.99    1.58
  19  -8  -4   12.96    1.60
  19  -8  -4   11.47    1.59
 -19   8   5    1.50    0.24
 -19   8   5    1.07    0.23
 -19   8   5    1.87    0.28
 -19   8   5    1.61    0.24
  19  -8  -5    1.41    0.23
  19  -8  -5    1.58    0.26
 -19   8   6   14.70    1.88
 -19   8   6   15.20    1.88
 -19   8   6   14.08    1.90
  19  -8  -6   13.70    1.88
  19  -8  -6   14.81    1.90
 -19   8   7    0.13    0.12
 -19   8   7    0.10    0.15
 -19   8   7    0.14    0.11
  19  -8  -7    0.06    0.13
  19  -8  -7   -0.06    0.11
 -19   8   8   16.85    2.39
 -19   8   8   18.54    2.39
 -19   8   8   18.25    2.42
 -19   8   8   19.57    2.41
  19  -8  -8   19.58    2.40
  19  -8  -8   18.96    2.41
 -19   8   9    0.31    0.12
 -19   8   9    0.05    0.13
 -19   8   9    0.16    0.16
  19  -8  -9    0.37    0.13
  19  -8  -9    0.31    0.14
 -19   8  10    9.99    1.33
 -19   8  10   10.23    1.36
  19  -8 -10   10.30    1.34
  19  -8 -10   10.59    1.36
 -19   8  11    1.64    0.24
 -19   8  11    1.48    0.27
  19  -8 -11    1.36    0.24
  19  -8 -11    1.26    0.26
 -19   8  12    1.38    0.23
 -19   8  12    1.31    0.26
  19  -8 -12    1.27    0.23
  19  -8 -12    1.73    0.26
 -19   8  13    1.48    0.24
 -19   8  13    1.79    0.27
  19  -8 -13    0.85    0.24
  19  -8 -13    1.68    0.26
  19  -8 -13    1.50    0.25
 -19   8  14    0.49    0.14
 -19   8  14    0.41    0.16
  19  -8 -14    0.37    0.15
  19  -8 -14    0.30    0.14
 -19   8  15    0.15    0.13
 -19   8  15    0.52    0.15
  19  -8 -15   -0.11    0.14
  19  -8 -15    0.32    0.13
 -19   8  16    0.25    0.15
 -19   8  16    0.38    0.15
  19  -8 -16    0.17    0.15
  19  -8 -16    0.28    0.14
 -19   9   1    5.03    0.67
 -19   9   1    5.04    0.67
 -19   9   1    4.84    0.68
 -19   9   1    4.30    0.66
  19  -9  -1    5.47    0.67
  19  -9  -1    4.59    0.66
  19  -9  -1    5.34    0.69
  19  -9  -1    5.52    0.68
 -19   9   2    3.12    0.41
 -19   9   2    2.74    0.41
  19  -9  -2    2.61    0.41
  19  -9  -2    3.29    0.43
 -19   9   3    6.03    0.73
 -19   9   3    4.70    0.69
  19  -9  -3    5.13    0.70
  19  -9  -3    5.39    0.70
 -19   9   4    1.33    0.23
 -19   9   4    1.48    0.24
 -19   9   4    1.45    0.27
  19  -9  -4    1.25    0.23
  19  -9  -4    1.70    0.26
 -19   9   5    1.01    0.15
 -19   9   5    0.62    0.15
 -19   9   5    0.76    0.17
 -19   9   5    0.20    0.15
  19  -9  -5    0.24    0.14
  19  -9  -5    0.43    0.16
 -19   9   6    0.24    0.12
 -19   9   6    0.09    0.13
 -19   9   6    0.37    0.15
  19  -9  -6    0.46    0.14
  19  -9  -6    0.57    0.15
 -19   9   7    0.37    0.13
 -19   9   7    0.63    0.15
 -19   9   7    0.54    0.16
 -19   9   7    0.23    0.12
  19  -9  -7    0.41    0.15
  19  -9  -7    0.76    0.16
 -19   9   8    0.24    0.13
 -19   9   8    0.69    0.14
 -19   9   8    0.36    0.14
 -19   9   8    0.39    0.14
  19  -9  -8    0.58    0.14
  19  -9  -8    0.12    0.13
 -19   9   9    0.32    0.13
 -19   9   9    0.26    0.14
 -19   9   9    0.48    0.15
  19  -9  -9    0.35    0.15
  19  -9  -9    0.22    0.15
 -19   9  10    6.93    0.82
 -19   9  10    5.87    0.83
  19  -9 -10    6.17    0.82
  19  -9 -10    5.48    0.83
 -19   9  11    1.26    0.24
  19  -9 -11    1.33    0.25
 -19   9  12    2.60    0.37
 -19   9  12    2.35    0.39
  19  -9 -12    2.92    0.38
  19  -9 -12    2.15    0.38
 -19   9  13    4.06    0.50
 -19   9  13    3.00    0.50
  19  -9 -13    3.34    0.49
  19  -9 -13    3.57    0.51
 -19   9  14    1.73    0.26
 -19   9  14    2.18    0.30
  19  -9 -14    1.48    0.26
  19  -9 -14    1.11    0.26
 -19   9  15    3.71    0.53
 -19   9  15    3.53    0.55
  19  -9 -15    4.27    0.54
  19  -9 -15    3.64    0.54
 -19  10   1    3.56    0.49
 -19  10   1    2.86    0.49
  19 -10  -1    4.36    0.50
  19 -10  -1    3.83    0.52
 -19  10   2    0.83    0.17
 -19  10   2    1.00    0.19
 -19  10   2    0.82    0.19
 -19  10   2    0.48    0.16
  19 -10  -2    1.01    0.20
  19 -10  -2    1.16    0.18
  19 -10  -2    1.15    0.20
  19 -10  -2    0.59    0.19
 -19  10   3    5.37    0.72
 -19  10   3    5.15    0.72
 -19  10   3    5.62    0.74
 -19  10   3    4.83    0.71
  19 -10  -3    5.64    0.72
  19 -10  -3    5.84    0.74
 -19  10   4    6.70    0.97
 -19  10   4    8.66    0.99
 -19  10   4    7.34    1.00
 -19  10   4    6.50    0.98
  19 -10  -4    7.85    0.98
  19 -10  -4    7.80    1.00
 -19  10   5    8.63    1.17
 -19  10   5    8.69    1.19
  19 -10  -5    9.25    1.17
  19 -10  -5    9.23    1.19
 -19  10   6   11.74    1.55
 -19  10   6   12.21    1.55
 -19  10   6   11.22    1.56
 -19  10   6   11.78    1.55
  19 -10  -6   12.30    1.55
  19 -10  -6   12.07    1.57
 -19  10   7    1.86    0.28
 -19  10   7    1.63    0.28
 -19  10   7    1.81    0.30
 -19  10   7    1.76    0.28
  19 -10  -7    1.97    0.30
  19 -10  -7    1.84    0.30
 -19  10   8   14.99    2.02
 -19  10   8   16.90    2.02
 -19  10   8   14.44    2.03
 -19  10   8   15.95    2.02
  19 -10  -8   15.20    2.01
  19 -10  -8   16.15    2.04
 -19  10   9    0.20    0.14
 -19  10   9   -0.01    0.14
 -19  10   9    0.46    0.16
 -19  10   9    0.38    0.15
  19 -10  -9    0.16    0.15
  19 -10  -9    0.42    0.15
 -19  10  11    0.53    0.18
 -19  10  11    0.58    0.17
  19 -10 -11    0.79    0.18
  19 -10 -11    0.55    0.18
 -19  10  12    3.22    0.46
 -19  10  12    2.61    0.46
  19 -10 -12    3.62    0.46
  19 -10 -12    3.24    0.47
 -19  10  13    0.44    0.16
 -19  10  13    0.93    0.20
  19 -10 -13    0.52    0.17
  19 -10 -13    0.48    0.18
 -19  10  14    1.17    0.25
 -19  10  14    1.39    0.27
  19 -10 -14    1.34    0.26
  19 -10 -14    1.44    0.26
 -19  11   1   13.11    1.77
 -19  11   1   12.95    1.77
 -19  11   1   13.09    1.79
 -19  11   1   14.22    1.78
  19 -11  -1   13.74    1.78
  19 -11  -1   14.59    1.80
  19 -11  -1   14.47    1.80
 -19  11   2    1.08    0.18
 -19  11   2    0.99    0.20
 -19  11   2    1.00    0.21
 -19  11   2    0.73    0.17
  19 -11  -2    0.90    0.21
  19 -11  -2    1.03    0.20
 -19  11   3    8.17    1.16
 -19  11   3    8.57    1.18
 -19  11   3    9.41    1.18
  19 -11  -3    8.85    1.17
  19 -11  -3   10.05    1.20
 -19  11   4    0.90    0.21
 -19  11   4    0.86    0.20
  19 -11  -4    1.03    0.20
  19 -11  -4    0.81    0.19
 -19  11   5   -0.12    0.11
 -19  11   5    0.29    0.14
 -19  11   5   -0.12    0.13
 -19  11   5    0.12    0.12
  19 -11  -5    0.09    0.15
  19 -11  -5    0.17    0.13
 -19  11   6    0.21    0.12
 -19  11   6    0.07    0.14
 -19  11   6    0.22    0.15
 -19  11   6    0.21    0.12
  19 -11  -6    0.28    0.14
  19 -11  -6    0.52    0.15
 -19  11   7    0.10    0.12
 -19  11   7    0.26    0.14
 -19  11   7    0.51    0.16
 -19  11   7   -0.17    0.11
  19 -11  -7    0.22    0.14
  19 -11  -7    0.60    0.16
 -19  11   8    1.15    0.21
 -19  11   8    1.76    0.24
 -19  11   8    1.62    0.25
 -19  11   8    0.75    0.19
  19 -11  -8    1.24    0.23
  19 -11  -8    1.14    0.24
 -19  11   9    0.53    0.15
 -19  11  10    4.72    0.62
 -19  11  10    3.73    0.62
  19 -11 -10    4.98    0.62
  19 -11 -10    4.48    0.63
 -19  11  11    0.34    0.14
 -19  11  11    0.12    0.14
  19 -11 -11    0.03    0.14
  19 -11 -11    0.10    0.16
 -19  11  12    3.32    0.43
 -19  11  12    2.62    0.42
  19 -11 -12    2.89    0.42
  19 -11 -12    2.52    0.42
 -19  11  13    0.77    0.18
 -19  11  13    0.72    0.20
  19 -11 -13    0.85    0.19
  19 -11 -13    0.38    0.19
 -19  11  14    4.36    0.63
  19 -11 -14    4.67    0.64
 -19  12   1    3.67    0.51
 -19  12   1    5.13    0.53
 -19  12   1    3.66    0.53
 -19  12   1    3.09    0.50
  19 -12  -1    3.41    0.52
  19 -12  -1    3.75    0.53
 -19  12   2   -0.13    0.13
 -19  12   2   -0.10    0.12
  19 -12  -2    0.06    0.16
  19 -12  -2    0.21    0.14
 -19  12   3   12.00    1.60
 -19  12   3   14.60    1.63
 -19  12   3   10.74    1.61
 -19  12   3   11.22    1.60
  19 -12  -3   13.79    1.63
  19 -12  -3   13.04    1.64
 -19  12   4    1.07    0.21
 -19  12   4    1.95    0.25
 -19  12   4    1.04    0.23
 -19  12   4    0.83    0.21
  19 -12  -4    2.00    0.26
  19 -12  -4    1.06    0.23
 -19  12   5   13.71    1.92
 -19  12   5   16.76    1.94
 -19  12   5   13.72    1.94
 -19  12   5   14.85    1.93
  19 -12  -5   14.64    1.94
  19 -12  -5   16.27    1.96
 -19  12   6    4.89    0.59
 -19  12   6    5.06    0.61
 -19  12   6    4.73    0.62
 -19  12   6    3.65    0.58
  19 -12  -6    4.40    0.61
  19 -12  -6    3.65    0.61
 -19  12   7    6.59    0.97
 -19  12   7    7.16    0.98
 -19  12   7    7.81    1.00
 -19  12   7    7.23    0.98
  19 -12  -7    8.03    0.99
  19 -12  -7    8.41    1.01
 -19  12   8   10.24    1.36
 -19  12   8   10.56    1.36
 -19  12   9    3.23    0.47
 -19  12   9    3.51    0.49
 -19  12   9    2.99    0.47
  19 -12  -9    3.71    0.48
  19 -12  -9    3.46    0.50
 -19  12  10    7.41    1.01
 -19  12  10    7.58    1.03
  19 -12 -10    7.68    1.01
  19 -12 -10    7.85    1.03
 -19  12  11    0.62    0.16
 -19  12  11    1.03    0.19
  19 -12 -11    0.20    0.15
  19 -12 -11    0.04    0.16
 -19  12  12    5.92    0.76
 -19  12  12    5.96    0.78
  19 -12 -12    5.51    0.77
  19 -12 -12    5.13    0.77
 -19  12  13    0.47    0.18
 -19  12  13   -0.09    0.16
  19 -12 -13    0.09    0.18
  19 -12 -13    0.14    0.18
 -19  13   1   12.31    1.53
 -19  13   1   12.15    1.54
 -19  13   1   10.98    1.54
  19 -13  -1   11.40    1.54
  19 -13  -1   11.80    1.55
 -19  13   2    0.83    0.15
 -19  13   2    0.43    0.17
 -19  13   2    0.42    0.16
 -19  13   2    0.54    0.15
  19 -13  -2    0.48    0.18
  19 -13  -2    0.82    0.18
 -19  13   3    5.46    0.73
 -19  13   3    4.99    0.74
 -19  13   3    5.03    0.75
 -19  13   3    5.42    0.74
  19 -13  -3    6.03    0.76
  19 -13  -3    6.53    0.77
 -19  13   4    0.15    0.11
 -19  13   4   -0.04    0.15
 -19  13   4    0.04    0.13
 -19  13   4    0.11    0.11
  19 -13  -4   -0.46    0.16
  19 -13  -4    0.01    0.14
 -19  13   5    0.76    0.15
 -19  13   5    0.35    0.17
 -19  13   5    0.33    0.18
 -19  13   5    0.59    0.15
  19 -13  -5    0.95    0.19
 -19  13   6    0.18    0.11
 -19  13   6    0.20    0.14
 -19  13   6    0.06    0.11
  19 -13  -6    0.13    0.18
 -19  13   7    0.39    0.12
 -19  13   7    0.25    0.17
 -19  13   7    0.00    0.13
 -19  13   7    0.19    0.11
  19 -13  -7    0.31    0.18
  19 -13  -7   -0.12    0.13
 -19  13   8    1.23    0.21
 -19  13   8    1.60    0.23
 -19  13   8    1.39    0.24
 -19  13   8    0.78    0.20
  19 -13  -8    1.20    0.25
  19 -13  -8    1.14    0.23
 -19  13   9   -0.01    0.14
 -19  13   9    0.34    0.15
  19 -13  -9    0.14    0.15
  19 -13  -9    0.08    0.14
 -19  13  10    2.84    0.35
 -19  13  10    2.18    0.35
  19 -13 -10    2.04    0.35
  19 -13 -10    1.71    0.34
 -19  13  11    0.29    0.16
 -19  13  11    0.04    0.15
  19 -13 -11    0.02    0.16
  19 -13 -11    0.77    0.18
 -19  13  12    3.97    0.50
  19 -13 -12    2.76    0.48
 -19  14   1    2.85    0.39
 -19  14   1    2.90    0.42
 -19  14   1    2.79    0.41
 -19  14   1    2.41    0.40
  19 -14  -1    3.12    0.43
  19 -14  -1    3.02    0.43
 -19  14   2    0.29    0.12
 -19  14   2    0.67    0.19
 -19  14   2    0.28    0.15
 -19  14   2    0.40    0.12
  19 -14  -2    0.66    0.21
  19 -14  -2    0.00    0.17
 -19  14   3   10.18    1.33
 -19  14   3   11.20    1.35
 -19  14   3    9.84    1.35
 -19  14   3    8.75    1.32
  19 -14  -3   11.32    1.35
  19 -14  -3   11.04    1.36
 -19  14   4    0.44    0.13
 -19  14   4   -0.04    0.16
 -19  14   4   -0.01    0.13
 -19  14   4    0.22    0.12
  19 -14  -4    0.32    0.16
  19 -14  -4    0.21    0.16
 -19  14   5   11.00    1.32
 -19  14   5    9.30    1.31
 -19  14   6    0.06    0.11
 -19  14   6    0.36    0.16
 -19  14   6    0.14    0.14
 -19  14   6    0.22    0.12
  19 -14  -6    0.43    0.16
  19 -14  -6    0.25    0.16
 -19  14   7    9.09    1.32
 -19  14   7   10.08    1.31
  19 -14  -7   11.23    1.33
  19 -14  -7    9.84    1.33
 -19  14   8    2.59    0.35
 -19  14   8    2.02    0.35
  19 -14  -8    2.07    0.34
  19 -14  -8    2.13    0.35
 -19  14   9    5.11    0.70
 -19  14   9    4.45    0.69
  19 -14  -9    5.40    0.70
  19 -14  -9    5.14    0.71
 -19  14  10    3.18    0.46
 -19  14  10    3.08    0.47
  19 -14 -10    2.99    0.46
  19 -14 -10    3.19    0.47
 -19  15   1    3.41    0.44
 -19  15   1    3.48    0.47
 -19  15   1    2.46    0.45
 -19  15   1    3.25    0.44
  19 -15  -1    2.92    0.46
  19 -15  -1    3.11    0.47
 -19  15   2    2.84    0.41
 -19  15   2    2.76    0.39
  19 -15  -2    2.54    0.42
  19 -15  -2    2.65    0.42
 -19  15   3    0.66    0.16
 -19  15   3    0.60    0.20
 -19  15   3    0.62    0.14
  19 -15  -3    0.60    0.19
 -19  15   4    1.04    0.19
 -19  15   4    1.04    0.23
 -19  15   4    0.91    0.18
  19 -15  -4    0.83    0.24
 -19  15   5    0.36    0.12
 -19  15   5    0.09    0.16
 -19  15   5    0.34    0.15
  19 -15  -5    0.34    0.19
  19 -15  -5   -0.19    0.14
 -19  15   6    0.36    0.16
 -19  15   6    0.21    0.14
  19 -15  -6    0.42    0.20
  19 -15  -6    0.45    0.17
 -19  15   7   -0.28    0.16
 -19  15   7    0.15    0.14
  19 -15  -7   -0.04    0.16
  19 -15  -7    0.38    0.16
 -19  15   8    0.77    0.22
 -19  15   8    0.32    0.20
  19 -15  -8    1.47    0.25
  19 -15  -8    0.96    0.21
 -19  15   9    1.15    0.21
 -19  15   9    0.34    0.20
  19 -15  -9    0.54    0.22
  19 -15  -9    0.31    0.18
 -19  16   1    1.12    0.20
 -19  16   1    1.26    0.24
 -19  16   1    1.38    0.21
  19 -16  -1    1.17    0.26
 -19  16   2    2.52    0.35
 -19  16   2    3.03    0.39
 -19  16   2    2.35    0.35
  19 -16  -2    1.99    0.38
 -19  16   3    4.45    0.64
 -19  16   3    4.43    0.62
  19 -16  -3    5.56    0.66
  19 -16  -3    4.07    0.64
 -19  16   4    2.45    0.35
 -19  16   4    2.02    0.34
 -19  16   4    1.89    0.31
  19 -16  -4    2.12    0.36
  19 -16  -4    2.01    0.34
 -19  16   5    5.68    0.72
 -19  16   5    4.62    0.71
  19 -16  -5    5.35    0.72
  19 -16  -5    4.97    0.72
 -19  16   6   -0.20    0.17
 -19  16   6   -0.15    0.15
  19 -16  -6    0.13    0.19
  19 -16  -6    0.01    0.16
 -19  16   7    6.07    0.79
 -19  16   7    5.41    0.78
  19 -16  -7    5.40    0.78
  19 -16  -7    5.87    0.79
 -19  16   8    0.03    0.18
 -19  16   8   -0.01    0.18
  19 -16  -8    0.35    0.22
  19 -16  -8    0.04    0.16
 -19  17   1    0.30    0.20
 -19  17   1    0.52    0.17
 -19  17   1    0.35    0.12
  19 -17  -1    0.31    0.19
  19 -17  -1    0.21    0.19
 -19  17   2    1.88    0.29
 -19  17   2    1.32    0.28
 -19  17   2    1.13    0.22
  19 -17  -2    1.16    0.28
  19 -17  -2    1.56    0.27
 -19  17   3   -0.10    0.18
 -19  17   3    0.17    0.17
  19 -17  -3   -0.25    0.16
  19 -17  -3    0.10    0.15
 -19  17   4    0.80    0.21
 -19  17   4    0.40    0.19
  19 -17  -4    0.67    0.19
 -19  17   5   -0.07    0.18
 -19  17   5    0.36    0.16
  19 -17  -5   -0.16    0.20
  19 -17  -5    0.11    0.17
 -19  17   6    0.42    0.21
 -19  17   6    0.26    0.18
  19 -17  -6    0.06    0.19
  19 -17  -6    0.69    0.18
 -19  18   1    0.21    0.19
 -19  18   1    0.23    0.15
  19 -18  -1    0.61    0.22
  19 -18  -1    0.29    0.19
 -19  18   2    4.03    0.56
 -19  18   2    3.57    0.54
  19 -18  -2    3.82    0.56
  19 -18  -2    3.50    0.54
 -19  18   3    1.45    0.30
 -19  18   3    1.44    0.27
  19 -18  -3    1.94    0.30
  19 -18  -3    0.97    0.25
 -19  18   4    1.84    0.36
 -19  18   4    2.18    0.35
  19 -18  -4    1.98    0.33
 -19  19   1    0.17    0.15
  19 -19  -1    0.06    0.21
  19 -19  -1    0.03    0.17
 -19  19   2    1.70    0.33
  19 -19  -2    2.12    0.34
 -19  19   3   -0.21    0.16
  19 -19  -3    0.24    0.17
 -18 -16   2   -0.04    0.16
  18  16  -2    0.22    0.14
 -18 -15   1    2.61    0.39
  18  15  -1    2.66    0.40
 -18 -15   2    0.13    0.15
  18  15  -2   -0.05    0.14
 -18 -15   3    2.99    0.43
  18  15  -3    2.93    0.43
 -18 -15   4    0.24    0.14
  18  15  -4    0.26    0.13
 -18 -15   5    2.33    0.29
  18  15  -5    1.16    0.25
 -18 -15   6    0.38    0.16
  18  15  -6    0.54    0.15
 -18 -14   1    0.27    0.17
 -18 -14   1   -0.14    0.14
  18  14  -1    0.37    0.15
 -18 -14   2   -0.06    0.16
 -18 -14   2    0.13    0.14
  18  14  -2   -0.07    0.14
 -18 -14   3    0.01    0.14
  18  14  -3    0.03    0.12
 -18 -14   4    0.07    0.11
  18  14  -4   -0.04    0.12
 -18 -14   5    0.03    0.14
  18  14  -5    0.16    0.12
 -18 -14   6    0.02    0.14
  18  14  -6    0.30    0.14
 -18 -14   7    0.73    0.18
  18  14  -7    0.50    0.17
 -18 -14   8    0.54    0.16
  18  14  -8    0.26    0.13
 -18 -14   9    0.28    0.17
  18  14  -9    0.78    0.16
 -18 -13   1    2.56    0.36
 -18 -13   1    2.41    0.33
 -18 -13   1    1.83    0.35
  18  13  -1    2.24    0.32
  18  13  -1    1.80    0.32
 -18 -13   2    0.76    0.19
 -18 -13   2    0.34    0.17
 -18 -13   2    0.28    0.17
  18  13  -2    0.26    0.14
  18  13  -2    0.57    0.14
 -18 -13   3    2.52    0.38
 -18 -13   3    2.36    0.37
  18  13  -3    2.24    0.35
 -18 -13   4    0.15    0.16
 -18 -13   4    0.26    0.12
 -18 -13   4    0.10    0.16
  18  13  -4    0.07    0.12
  18  13  -4    0.37    0.12
 -18 -13   5    2.29    0.39
 -18 -13   5    2.55    0.37
 -18 -13   5    2.19    0.39
  18  13  -5    2.74    0.37
  18  13  -5    2.56    0.37
 -18 -13   6    0.19    0.14
 -18 -13   6   -0.11    0.17
  18  13  -6    0.14    0.12
  18  13  -6    0.29    0.11
 -18 -13   7    2.83    0.37
 -18 -13   7    2.22    0.39
  18  13  -7    2.34    0.35
  18  13  -7    2.35    0.36
 -18 -13   8    0.55    0.16
 -18 -13   8    0.83    0.21
  18  13  -8    0.60    0.15
  18  13  -8    0.58    0.15
 -18 -13   9    1.17    0.23
  18  13  -9    1.63    0.24
 -18 -13  10    0.90    0.21
  18  13 -10    1.12    0.20
 -18 -13  11   -0.15    0.15
  18  13 -11    0.02    0.12
 -18 -12   1    0.23    0.16
  18  12  -1    0.39    0.13
  18  12  -1    0.39    0.11
 -18 -12   2   -0.13    0.15
 -18 -12   2   -0.04    0.13
 -18 -12   2    0.07    0.16
  18  12  -2    0.15    0.11
 -18 -12   3    0.06    0.16
 -18 -12   3   -0.21    0.10
 -18 -12   3    0.32    0.17
  18  12  -3    0.15    0.11
  18  12  -3   -0.16    0.10
 -18 -12   4    0.12    0.15
 -18 -12   4   -0.10    0.13
 -18 -12   4    0.19    0.16
  18  12  -4    0.07    0.12
  18  12  -4    0.03    0.10
 -18 -12   5    0.29    0.16
 -18 -12   5    0.54    0.14
 -18 -12   5   -0.04    0.17
  18  12  -5    0.57    0.13
  18  12  -5    0.44    0.12
 -18 -12   6   -0.07    0.14
 -18 -12   6    0.06    0.15
  18  12  -6   -0.18    0.09
 -18 -12   7    1.90    0.33
 -18 -12   7    1.93    0.30
 -18 -12   7    2.20    0.34
  18  12  -7    1.95    0.30
  18  12  -7    2.01    0.30
 -18 -12   8    0.42    0.18
 -18 -12   8    0.36    0.13
 -18 -12   8    0.42    0.18
  18  12  -8    0.09    0.11
  18  12  -8    0.16    0.11
 -18 -12   9    2.34    0.37
 -18 -12   9    2.36    0.39
  18  12  -9    2.79    0.37
  18  12  -9    2.44    0.36
 -18 -12  10    1.76    0.26
 -18 -12  10    2.28    0.31
  18  12 -10    1.22    0.24
  18  12 -10    1.55    0.25
 -18 -12  11    2.53    0.36
 -18 -12  11    2.75    0.39
  18  12 -11    2.00    0.34
  18  12 -11    2.40    0.34
 -18 -12  12    4.09    0.61
 -18 -12  12    4.32    0.65
  18  12 -12    4.62    0.61
  18  12 -12    4.83    0.62
 -18 -11   1    1.55    0.27
 -18 -11   1    1.76    0.32
 -18 -11   1    1.38    0.30
  18  11  -1    2.04    0.28
  18  11  -1    1.73    0.26
 -18 -11   2    2.58    0.39
 -18 -11   2    2.43    0.36
 -18 -11   2    2.57    0.40
 -18 -11   2    2.75    0.39
  18  11  -2    2.57    0.36
  18  11  -2    2.17    0.35
 -18 -11   3    3.59    0.47
 -18 -11   3    3.40    0.44
 -18 -11   3    3.07    0.49
 -18 -11   3    2.89    0.47
  18  11  -3    3.33    0.43
  18  11  -3    2.65    0.43
 -18 -11   4    1.37    0.27
 -18 -11   4    1.49    0.24
 -18 -11   4    2.21    0.31
 -18 -11   4    1.57    0.28
  18  11  -4    1.56    0.24
  18  11  -4    1.36    0.23
 -18 -11   5    6.98    0.99
 -18 -11   5    7.83    0.98
 -18 -11   5    7.08    1.00
 -18 -11   5    6.85    0.99
  18  11  -5    7.84    0.98
  18  11  -5    7.60    0.98
 -18 -11   6    0.31    0.14
 -18 -11   6   -0.08    0.13
 -18 -11   6    0.09    0.17
 -18 -11   6   -0.02    0.15
  18  11  -6   -0.04    0.12
  18  11  -6    0.14    0.10
 -18 -11   7    5.60    0.77
 -18 -11   7    5.65    0.76
 -18 -11   7    5.14    0.77
  18  11  -7    6.19    0.76
  18  11  -7    5.49    0.75
 -18 -11   8    0.22    0.15
 -18 -11   8    0.64    0.18
  18  11  -8    0.12    0.10
 -18 -11   9    3.37    0.49
 -18 -11   9    3.08    0.47
 -18 -11   9    3.50    0.51
  18  11  -9    3.49    0.47
  18  11  -9    3.65    0.47
 -18 -11  10    0.60    0.20
 -18 -11  10    0.74    0.19
 -18 -11  10    1.30    0.23
  18  11 -10    1.08    0.19
  18  11 -10    0.93    0.17
 -18 -11  11    0.56    0.14
 -18 -11  11    0.66    0.19
  18  11 -11    0.25    0.12
  18  11 -11    0.36    0.12
 -18 -11  12    0.63    0.16
 -18 -11  12    0.66    0.22
  18  11 -12    0.65    0.14
 -18 -11  13    0.45    0.14
 -18 -11  13    0.31    0.19
  18  11 -13    0.23    0.13
  18  11 -13    0.05    0.11
 -18 -11  14    0.15    0.14
 -18 -11  14    0.29    0.15
  18  11 -14    0.02    0.12
  18  11 -14    0.13    0.10
 -18 -10   1    0.06    0.15
 -18 -10   1    0.05    0.13
 -18 -10   1    0.08    0.17
  18  10  -1    0.03    0.11
  18  10  -1    0.12    0.12
 -18 -10   2    0.35    0.16
 -18 -10   2    0.24    0.12
 -18 -10   2    0.32    0.17
  18  10  -2    0.33    0.13
 -18 -10   3    0.33    0.13
  18  10  -3    0.16    0.13
 -18 -10   4    0.19    0.13
 -18 -10   4   -0.14    0.12
 -18 -10   4   -0.10    0.16
  18  10  -4   -0.08    0.10
 -18 -10   5   -0.01    0.13
 -18 -10   5    0.36    0.13
 -18 -10   5    0.16    0.18
  18  10  -5    0.27    0.13
 -18 -10   6    0.11    0.16
 -18 -10   6    0.25    0.11
 -18 -10   6    0.43    0.20
  18  10  -6    0.40    0.12
 -18 -10   7    1.33    0.25
 -18 -10   7    2.01    0.24
 -18 -10   7    1.15    0.28
 -18 -10   7    1.31    0.26
  18  10  -7    1.40    0.22
  18  10  -7    1.06    0.22
 -18 -10   8    0.34    0.16
 -18 -10   8    0.67    0.16
 -18 -10   8    1.06    0.20
  18  10  -8    0.31    0.14
  18  10  -8    0.71    0.14
 -18 -10   9    6.05    0.76
 -18 -10   9    6.31    0.78
  18  10  -9    4.89    0.73
  18  10  -9    5.47    0.74
 -18 -10  10    0.34    0.15
 -18 -10  10    0.39    0.14
 -18 -10  10    0.72    0.20
  18  10 -10    0.46    0.13
  18  10 -10    0.26    0.11
 -18 -10  11    6.66    0.90
 -18 -10  11    5.97    0.88
 -18 -10  11    7.82    0.93
  18  10 -11    7.13    0.89
  18  10 -11    6.51    0.88
 -18 -10  12    2.33    0.30
 -18 -10  12    1.92    0.33
  18  10 -12    2.01    0.29
  18  10 -12    1.55    0.28
 -18 -10  13    5.40    0.66
 -18 -10  13    4.69    0.68
  18  10 -13    4.87    0.65
  18  10 -13    4.38    0.65
 -18 -10  14    4.91    0.60
 -18 -10  14    4.81    0.63
  18  10 -14    4.61    0.59
  18  10 -14    3.49    0.58
 -18 -10  15    1.29    0.22
 -18 -10  15    1.51    0.25
  18  10 -15    1.28    0.21
  18  10 -15    0.78    0.19
 -18 -10  16    8.71    1.10
  18  10 -16    7.75    1.07
 -18  -9   1    0.26    0.15
 -18  -9   1    0.51    0.19
 -18  -9   1   -0.01    0.16
  18   9  -1    0.13    0.20
  18   9  -1    0.40    0.12
 -18  -9   2    8.01    1.04
 -18  -9   2    7.45    1.02
 -18  -9   2    6.77    1.04
 -18  -9   2    8.16    1.05
  18   9  -2    8.11    1.02
  18   9  -2    7.78    1.05
  18   9  -2    8.23    1.03
 -18  -9   3    1.60    0.27
 -18  -9   3    1.84    0.26
  18   9  -3    1.68    0.25
  18   9  -3    1.31    0.24
 -18  -9   4    9.27    1.20
 -18  -9   4    8.90    1.18
 -18  -9   4    9.13    1.21
 -18  -9   4   10.25    1.22
  18   9  -4    8.31    1.17
  18   9  -4    9.09    1.18
 -18  -9   5    7.65    0.98
 -18  -9   5    6.80    1.00
 -18  -9   5    7.09    1.00
  18   9  -5    8.15    0.98
  18   9  -5    7.20    0.98
 -18  -9   6    3.92    0.63
 -18  -9   6    4.35    0.61
 -18  -9   6    4.72    0.65
 -18  -9   6    4.55    0.65
  18   9  -6    4.74    0.61
  18   9  -6    5.08    0.62
 -18  -9   7   10.26    1.25
 -18  -9   7    9.35    1.23
 -18  -9   7    9.28    1.25
 -18  -9   7    9.66    1.26
  18   9  -7   10.39    1.24
  18   9  -7    8.23    1.22
 -18  -9   8    0.36    0.17
 -18  -9   8    0.19    0.14
 -18  -9   8    0.51    0.18
  18   9  -8    0.56    0.13
  18   9  -8    0.25    0.12
 -18  -9   9    6.68    0.90
 -18  -9   9    6.31    0.89
  18   9  -9    7.19    0.89
 -18  -9  10    0.82    0.18
 -18  -9  10    0.58    0.15
 -18  -9  10    0.08    0.19
  18   9 -10    0.69    0.15
 -18  -9  11    0.63    0.21
 -18  -9  11    1.13    0.25
  18   9 -11    1.27    0.20
  18   9 -11    2.82    0.38
 -18  -9  12    0.22    0.15
 -18  -9  12    0.77    0.15
 -18  -9  12    0.53    0.18
  18   9 -12    0.36    0.13
  18   9 -12    0.26    0.11
  18   9 -12   -0.09    0.23
 -18  -9  13    0.08    0.13
 -18  -9  13    0.16    0.18
  18   9 -13   -0.06    0.12
  18   9 -13   -0.02    0.09
 -18  -9  14   -0.12    0.14
 -18  -9  14    0.19    0.16
  18   9 -14   -0.08    0.12
  18   9 -14    0.28    0.10
 -18  -9  15    0.16    0.14
 -18  -9  15   -0.30    0.15
  18   9 -15   -0.14    0.10
  18   9 -15    0.18    0.10
 -18  -9  16    0.30    0.16
 -18  -9  16    0.50    0.18
  18   9 -16    0.49    0.14
  18   9 -16    0.47    0.13
 -18  -9  17    0.56    0.19
  18   9 -17    0.65    0.14
 -18  -8   1    0.15    0.14
 -18  -8   1    0.26    0.13
 -18  -8   1    0.29    0.19
 -18  -8   1    0.29    0.17
  18   8  -1    0.15    0.10
  18   8  -1    0.37    0.17
  18   8  -1    0.21    0.12
 -18  -8   2    1.78    0.23
 -18  -8   2    1.26    0.22
 -18  -8   2    1.14    0.28
 -18  -8   2    1.33    0.25
  18   8  -2    1.15    0.19
  18   8  -2    1.17    0.26
  18   8  -2    0.98    0.21
 -18  -8   3   -0.08    0.12
 -18  -8   3    0.14    0.18
 -18  -8   3   -0.40    0.17
  18   8  -3    0.29    0.17
  18   8  -3   -0.04    0.10
 -18  -8   4    0.08    0.13
 -18  -8   4   -0.02    0.11
 -18  -8   4    0.02    0.18
 -18  -8   4   -0.05    0.14
  18   8  -4    0.04    0.10
  18   8  -4    0.15    0.18
  18   8  -4    0.14    0.10
 -18  -8   5    0.24    0.12
 -18  -8   5    0.04    0.12
 -18  -8   5    0.00    0.17
 -18  -8   5   -0.20    0.14
  18   8  -5    0.26    0.10
  18   8  -5    0.19    0.09
 -18  -8   6    1.46    0.25
 -18  -8   6    1.19    0.21
 -18  -8   6    1.33    0.27
 -18  -8   6    1.87    0.28
  18   8  -6    0.87    0.21
  18   8  -6    1.27    0.21
 -18  -8   7    1.02    0.20
 -18  -8   7    1.25    0.26
 -18  -8   7    1.47    0.25
  18   8  -7    1.02    0.19
  18   8  -7    0.89    0.18
 -18  -8   8    1.56    0.27
 -18  -8   8    1.57    0.26
 -18  -8   8    1.50    0.29
  18   8  -8    1.66    0.25
  18   8  -8    1.78    0.25
 -18  -8   9    6.08    0.83
 -18  -8   9    5.12    0.80
 -18  -8   9    7.03    0.85
  18   8  -9    6.67    0.81
  18   8  -9    6.28    0.81
 -18  -8  10   -0.06    0.14
 -18  -8  10   -0.03    0.12
 -18  -8  10    0.11    0.16
  18   8 -10   -0.03    0.10
  18   8 -10   -0.07    0.09
 -18  -8  11   10.62    1.36
 -18  -8  11   10.58    1.34
 -18  -8  11   10.13    1.38
  18   8 -11   11.11    1.34
  18   8 -11    9.27    1.34
  18   8 -11    9.67    1.42
 -18  -8  12    0.21    0.14
  18   8 -12   -0.16    0.22
 -18  -8  13   11.36    1.43
 -18  -8  13   11.07    1.41
 -18  -8  13   11.08    1.45
  18   8 -13   11.66    1.41
  18   8 -13   10.41    1.41
  18   8 -13    8.73    1.45
 -18  -8  14    2.12    0.34
  18   8 -14    3.11    0.35
  18   8 -14    2.01    0.34
  18   8 -14    1.96    0.41
 -18  -8  15    5.16    0.71
 -18  -8  15    4.55    0.73
  18   8 -15    5.86    0.71
 -18  -8  16    7.76    1.00
 -18  -8  16    7.24    1.02
  18   8 -16    7.79    0.99
  18   8 -16    7.28    0.99
 -18  -8  17    1.11    0.23
 -18  -8  17    1.06    0.24
  18   8 -17    1.23    0.21
  18   8 -17    1.19    0.20
 -18  -8  18    4.30    0.60
  18   8 -18    4.03    0.57
 -18  -7   1    1.02    0.20
 -18  -7   1    1.22    0.19
 -18  -7   1    0.93    0.22
  18   7  -1    0.80    0.18
  18   7  -1    1.16    0.24
  18   7  -1    1.14    0.19
 -18  -7   2   11.73    1.40
 -18  -7   2   11.41    1.39
 -18  -7   2   10.46    1.41
  18   7  -2   10.06    1.37
  18   7  -2   11.26    1.41
  18   7  -2    9.55    1.37
 -18  -7   3   -0.09    0.12
 -18  -7   3    0.12    0.11
 -18  -7   3   -0.10    0.14
  18   7  -3    0.14    0.11
  18   7  -3    0.12    0.15
  18   7  -3   -0.09    0.09
 -18  -7   4   14.74    2.14
 -18  -7   4   16.69    2.17
  18   7  -4   16.65    2.14
  18   7  -4   19.27    2.18
  18   7  -4   16.81    2.15
 -18  -7   5    3.52    0.43
 -18  -7   5    2.50    0.41
 -18  -7   5    2.92    0.44
 -18  -7   5    2.55    0.44
  18   7  -5    3.23    0.45
  18   7  -5    2.82    0.41
 -18  -7   6   11.06    1.40
 -18  -7   6   10.97    1.38
 -18  -7   6   10.60    1.40
 -18  -7   6    9.94    1.40
  18   7  -6   10.33    1.37
  18   7  -6   10.77    1.39
 -18  -7   7    7.37    0.85
 -18  -7   7    6.13    0.82
 -18  -7   7    5.49    0.84
 -18  -7   7    6.03    0.85
  18   7  -7    6.59    0.82
  18   7  -7    6.01    0.82
 -18  -7   8    3.20    0.49
 -18  -7   8    3.98    0.54
  18   7  -8    4.10    0.50
  18   7  -8    3.41    0.50
 -18  -7   9    4.73    0.72
  18   7  -9    5.49    0.69
  18   7  -9    5.17    0.70
 -18  -7  10    0.08    0.13
 -18  -7  10   -0.11    0.11
 -18  -7  10    0.45    0.18
  18   7 -10    0.10    0.11
  18   7 -10    0.31    0.11
 -18  -7  11    1.01    0.21
 -18  -7  11    0.73    0.18
 -18  -7  11    1.03    0.23
  18   7 -11    1.11    0.18
  18   7 -11    0.92    0.18
 -18  -7  12    0.13    0.13
 -18  -7  12    0.44    0.13
 -18  -7  12   -0.18    0.14
  18   7 -12   -0.20    0.09
  18   7 -12    0.05    0.10
  18   7 -12   -0.09    0.27
 -18  -7  13    0.22    0.15
  18   7 -13    0.90    0.29
 -18  -7  14    0.09    0.13
  18   7 -14    0.29    0.11
  18   7 -14    0.38    0.11
  18   7 -14    0.83    0.30
 -18  -7  15    0.28    0.14
 -18  -7  15   -0.03    0.16
  18   7 -15    0.56    0.12
  18   7 -15    0.01    0.11
  18   7 -15    0.18    0.30
 -18  -7  16    0.12    0.14
 -18  -7  16    0.11    0.15
  18   7 -16    0.15    0.12
  18   7 -16    0.00    0.10
 -18  -7  17    2.36    0.32
 -18  -7  17    1.82    0.34
  18   7 -17    2.19    0.30
  18   7 -17    1.77    0.30
 -18  -7  18    1.00    0.25
  18   7 -18    1.22    0.21
 -18  -7  19    2.00    0.31
  18   7 -19    1.48    0.27
 -18  -6   1    1.04    0.18
 -18  -6   1    0.74    0.17
 -18  -6   1    0.75    0.24
 -18  -6   1    0.73    0.22
  18   6  -1    1.03    0.17
  18   6  -1    1.37    0.23
  18   6  -1    0.79    0.18
 -18  -6   2    0.93    0.17
 -18  -6   2    0.56    0.14
 -18  -6   2    0.97    0.22
 -18  -6   2    0.50    0.19
  18   6  -2    0.59    0.13
  18   6  -2    0.62    0.19
  18   6  -2    0.48    0.14
 -18  -6   3    0.45    0.15
 -18  -6   3    0.26    0.12
 -18  -6   3    0.51    0.20
 -18  -6   3    0.24    0.16
  18   6  -3    0.20    0.10
  18   6  -3    0.25    0.17
  18   6  -3    0.43    0.12
 -18  -6   4    0.13    0.13
 -18  -6   4   -0.04    0.11
 -18  -6   4   -0.01    0.17
 -18  -6   4   -0.04    0.15
  18   6  -4    0.12    0.10
  18   6  -4   -0.13    0.15
 -18  -6   5    0.94    0.17
 -18  -6   5    0.85    0.16
 -18  -6   5    0.43    0.18
 -18  -6   5    0.61    0.19
  18   6  -5    0.82    0.14
  18   6  -5    0.78    0.20
  18   6  -5    0.65    0.15
 -18  -6   6    1.46    0.27
 -18  -6   6    1.39    0.30
  18   6  -6    2.12    0.32
  18   6  -6    2.00    0.27
 -18  -6   7    1.06    0.22
 -18  -6   7    1.57    0.22
 -18  -6   7    1.23    0.25
  18   6  -7    1.44    0.20
  18   6  -7    0.92    0.20
 -18  -6   8    2.26    0.38
 -18  -6   8    2.34    0.37
 -18  -6   8    2.72    0.41
  18   6  -8    2.96    0.37
  18   6  -8    2.62    0.37
 -18  -6   9    4.49    0.62
 -18  -6   9    4.29    0.65
  18   6  -9    5.13    0.62
  18   6  -9    4.50    0.63
 -18  -6  10    2.74    0.37
 -18  -6  10    2.69    0.36
 -18  -6  10    2.22    0.38
  18   6 -10    2.35    0.34
  18   6 -10    2.24    0.35
 -18  -6  11   11.21    1.41
 -18  -6  11   10.89    1.40
 -18  -6  11   10.29    1.42
  18   6 -11   11.55    1.40
  18   6 -11    9.76    1.39
 -18  -6  12    1.26    0.25
 -18  -6  12    1.23    0.23
 -18  -6  12    1.19    0.26
  18   6 -12    1.29    0.22
  18   6 -12    1.51    0.22
  18   6 -12    2.20    0.42
 -18  -6  13   13.07    1.62
 -18  -6  13   12.29    1.59
 -18  -6  13   12.23    1.62
  18   6 -13   12.47    1.59
  18   6 -13   11.81    1.59
  18   6 -13   11.55    1.67
  18   6 -14    0.44    0.32
 -18  -6  15   10.85    1.36
 -18  -6  15   11.04    1.39
  18   6 -15    9.76    1.34
  18   6 -15   10.30    1.35
  18   6 -15   10.34    1.44
 -18  -6  16    3.43    0.46
 -18  -6  16    2.94    0.48
  18   6 -16    3.22    0.44
  18   6 -16    3.06    0.45
  18   6 -16    3.19    0.56
 -18  -6  17    4.68    0.65
 -18  -6  17    4.37    0.67
  18   6 -17    5.10    0.64
  18   6 -17    4.74    0.65
 -18  -6  18    2.60    0.42
 -18  -6  18    2.53    0.44
  18   6 -18    2.96    0.40
  18   6 -18    3.20    0.42
 -18  -6  19    0.47    0.20
  18   6 -19    0.62    0.15
 -18  -6  20    1.48    0.26
  18   6 -20    1.09    0.21
 -18  -5   1    5.93    0.80
 -18  -5   1    5.45    0.79
 -18  -5   1    5.88    0.81
  18   5  -1    6.31    0.79
  18   5  -1    6.22    0.82
  18   5  -1    6.86    0.89
 -18  -5   2   13.11    1.74
 -18  -5   2   13.22    1.73
 -18  -5   2   12.88    1.74
  18   5  -2   12.74    1.72
  18   5  -2   15.11    1.77
  18   5  -2   14.88    1.82
 -18  -5   3    0.43    0.13
 -18  -5   3    0.54    0.13
 -18  -5   3    0.59    0.16
 -18  -5   3    0.21    0.17
  18   5  -3    0.42    0.10
  18   5  -3    0.38    0.18
  18   5  -3    0.50    0.13
  18   5  -3   -0.03    0.24
 -18  -5   4   20.21    2.53
 -18  -5   4   19.71    2.51
 -18  -5   4   18.96    2.52
 -18  -5   4   19.17    2.54
  18   5  -4   18.39    2.50
  18   5  -4   21.51    2.55
 -18  -5   5    0.72    0.15
 -18  -5   5    0.62    0.15
 -18  -5   5    0.39    0.18
 -18  -5   5    0.34    0.16
  18   5  -5    0.46    0.12
  18   5  -5    0.32    0.18
  18   5  -5    0.55    0.13
 -18  -5   6   13.50    1.73
 -18  -5   6   12.60    1.72
 -18  -5   6   13.94    1.73
 -18  -5   6   11.81    1.74
  18   5  -6   13.56    1.72
  18   5  -6   12.89    1.74
  18   5  -6   14.92    1.74
 -18  -5   7    0.93    0.19
 -18  -5   7    1.16    0.20
 -18  -5   7    0.62    0.20
  18   5  -7    1.30    0.23
  18   5  -7    0.82    0.17
 -18  -5   8    4.97    0.77
  18   5  -8    5.75    0.74
  18   5  -8    5.98    0.76
 -18  -5   9    1.13    0.27
  18   5  -9    1.59    0.24
  18   5  -9    1.79    0.25
 -18  -5  10    0.77    0.17
 -18  -5  10    0.82    0.20
  18   5 -10    1.00    0.16
  18   5 -10    0.83    0.16
 -18  -5  11    2.22    0.34
 -18  -5  11    2.01    0.32
 -18  -5  11    1.73    0.35
  18   5 -11    2.34    0.31
  18   5 -11    2.37    0.32
 -18  -5  12   -0.13    0.14
 -18  -5  12   -0.07    0.12
 -18  -5  12    0.24    0.14
  18   5 -12    0.11    0.09
  18   5 -12   -0.05    0.10
  18   5 -12    0.59    0.35
 -18  -5  13    0.55    0.16
 -18  -5  13    0.79    0.19
  18   5 -13    0.68    0.14
  18   5 -13    0.86    0.16
  18   5 -13    1.07    0.37
 -18  -5  14    0.28    0.14
 -18  -5  14    0.30    0.16
  18   5 -14    0.27    0.11
  18   5 -14    0.15    0.10
  18   5 -14    0.44    0.34
 -18  -5  15   -0.03    0.13
  18   5 -15    0.06    0.10
  18   5 -15    0.08    0.32
 -18  -5  16    0.18    0.14
 -18  -5  16   -0.24    0.15
  18   5 -16    0.45    0.12
  18   5 -16   -0.02    0.09
  18   5 -16   -0.87    0.32
 -18  -5  17    1.64    0.27
 -18  -5  17    2.43    0.32
  18   5 -17    1.69    0.25
  18   5 -17    1.27    0.25
  18   5 -17    1.41    0.37
 -18  -5  18    0.47    0.17
 -18  -5  18    0.02    0.17
  18   5 -18    0.40    0.13
  18   5 -18    0.60    0.13
 -18  -5  19    2.23    0.31
  18   5 -19    1.35    0.24
  18   5 -19    1.50    0.26
 -18  -5  20    1.50    0.28
  18   5 -20    1.60    0.25
 -18  -4   1    0.43    0.14
 -18  -4   1    0.52    0.16
 -18  -4   1    0.26    0.17
  18   4  -1    0.30    0.11
  18   4  -1    0.41    0.13
  18   4  -1    0.14    0.29
 -18  -4   2   -0.07    0.12
 -18  -4   2    0.02    0.10
 -18  -4   2    0.13    0.16
 -18  -4   2   -0.26    0.15
  18   4  -2   -0.10    0.09
  18   4  -2    0.46    0.17
  18   4  -2    0.06    0.10
  18   4  -2   -0.45    0.24
 -18  -4   3    0.01    0.11
 -18  -4   3    0.20    0.11
 -18  -4   3   -0.26    0.16
 -18  -4   3    0.05    0.17
  18   4  -3    0.08    0.09
  18   4  -3   -0.05    0.15
  18   4  -3    0.24    0.11
  18   4  -3   -0.61    0.28
 -18  -4   4    1.10    0.20
 -18  -4   4    0.97    0.18
 -18  -4   4    1.12    0.22
  18   4  -4    0.92    0.17
  18   4  -4    1.03    0.22
 -18  -4   5    0.17    0.11
 -18  -4   5   -0.18    0.12
 -18  -4   5    0.01    0.14
  18   4  -5    0.21    0.09
  18   4  -5    0.03    0.15
  18   4  -5   -0.82    0.28
 -18  -4   6    3.98    0.56
 -18  -4   6    3.18    0.54
 -18  -4   6    4.44    0.56
 -18  -4   6    4.23    0.58
  18   4  -6    4.11    0.54
  18   4  -6    4.57    0.58
  18   4  -6    4.38    0.55
  18   4  -6    4.11    0.68
 -18  -4   7   -0.09    0.13
 -18  -4   7    0.11    0.12
 -18  -4   7    0.28    0.16
 -18  -4   7   -0.09    0.14
  18   4  -7    0.08    0.10
  18   4  -7   -0.19    0.15
  18   4  -7    0.11    0.09
 -18  -4   8    4.13    0.56
 -18  -4   8    3.96    0.55
 -18  -4   8    3.61    0.57
  18   4  -8    5.52    0.60
  18   4  -8    3.69    0.55
 -18  -4   9    1.06    0.21
 -18  -4   9    0.97    0.19
 -18  -4   9    0.77    0.20
  18   4  -9    1.05    0.18
 -18  -4  10    8.00    1.10
 -18  -4  10    8.17    1.09
 -18  -4  10    7.76    1.11
  18   4 -10    8.83    1.09
  18   4 -10    8.78    1.10
 -18  -4  11    5.50    0.91
 -18  -4  11    6.67    0.90
 -18  -4  11    6.54    0.93
  18   4 -11    7.90    0.90
  18   4 -11    7.31    0.91
 -18  -4  12    5.60    0.66
 -18  -4  12    4.33    0.63
 -18  -4  12    5.60    0.67
  18   4 -12    4.36    0.62
  18   4 -12    4.63    0.63
  18   4 -12    4.13    0.76
 -18  -4  13   11.16    1.37
 -18  -4  13    9.76    1.38
  18   4 -13   10.63    1.35
  18   4 -13   10.29    1.36
  18   4 -13    9.80    1.45
 -18  -4  14   -0.25    0.11
 -18  -4  14    0.01    0.14
  18   4 -14   -0.16    0.09
  18   4 -14    0.34    0.11
  18   4 -14   -0.61    0.41
 -18  -4  15    9.69    1.25
  18   4 -15    9.09    1.21
  18   4 -15    9.00    1.31
 -18  -4  16    0.02    0.14
  18   4 -16    0.23    0.11
  18   4 -16    1.08    0.39
 -18  -4  17    5.79    0.77
 -18  -4  17    7.10    0.82
  18   4 -17    5.42    0.75
  18   4 -17    5.49    0.77
  18   4 -17    5.93    0.87
 -18  -4  18    0.35    0.16
 -18  -4  18    0.17    0.16
  18   4 -18    0.20    0.11
  18   4 -18    0.36    0.13
 -18  -4  19    1.89    0.34
 -18  -4  19    2.13    0.37
  18   4 -19    2.40    0.32
  18   4 -19    2.39    0.34
 -18  -4  20    0.23    0.17
  18   4 -20    0.54    0.13
 -18  -4  21    0.73    0.21
 -18  -3   1   11.20    1.51
 -18  -3   1   11.25    1.52
 -18  -3   1   10.50    1.53
  18   3  -1   12.10    1.51
  18   3  -1   12.87    1.55
  18   3  -1   12.26    1.53
  18   3  -1   12.05    1.60
 -18  -3   2   13.85    1.68
 -18  -3   2   13.42    1.66
 -18  -3   2   11.97    1.65
 -18  -3   2   11.85    1.67
  18   3  -2   12.20    1.64
  18   3  -2   12.87    1.66
  18   3  -2   14.97    1.76
 -18  -3   3    2.43    0.36
 -18  -3   3    2.79    0.35
 -18  -3   3    1.82    0.34
 -18  -3   3    2.79    0.39
  18   3  -3    2.59    0.33
  18   3  -3    2.57    0.37
  18   3  -3    2.26    0.34
  18   3  -3    1.36    0.51
 -18  -3   4   18.45    2.48
 -18  -3   4   19.33    2.48
 -18  -3   4   19.05    2.48
 -18  -3   4   18.70    2.50
  18   3  -4   18.84    2.47
  18   3  -4   21.61    2.51
 -18  -3   5    0.25    0.12
 -18  -3   5    0.12    0.11
 -18  -3   5    0.34    0.16
 -18  -3   5   -0.05    0.15
  18   3  -5    0.26    0.09
  18   3  -5    0.48    0.16
  18   3  -5    0.31    0.12
  18   3  -5    0.91    0.34
 -18  -3   6   13.81    1.83
 -18  -3   6   14.13    1.82
 -18  -3   6   13.71    1.82
  18   3  -6   14.23    1.81
  18   3  -6   13.36    1.83
  18   3  -6   17.27    1.94
 -18  -3   7   -0.14    0.13
 -18  -3   7    0.34    0.14
  18   3  -7   -0.13    0.09
  18   3  -7   -0.13    0.14
  18   3  -7   -0.16    0.10
  18   3  -7   -0.14    0.38
 -18  -3   8    5.91    0.84
 -18  -3   8    6.67    0.87
  18   3  -8    6.04    0.85
  18   3  -8    6.78    0.84
 -18  -3   9    1.30    0.24
 -18  -3   9    1.43    0.23
 -18  -3   9    1.66    0.27
  18   3  -9    1.27    0.21
  18   3  -9    1.11    0.26
  18   3  -9    1.44    0.23
 -18  -3  10    4.17    0.62
  18   3 -10    3.99    0.57
  18   3 -10    5.16    0.60
 -18  -3  11    2.22    0.35
 -18  -3  11    2.05    0.38
  18   3 -11    2.70    0.34
  18   3 -11    2.56    0.36
 -18  -3  12    0.33    0.16
 -18  -3  12    0.12    0.11
 -18  -3  12    0.06    0.13
  18   3 -12    0.24    0.09
  18   3 -12    0.13    0.10
  18   3 -12    0.25    0.44
 -18  -3  13    1.08    0.20
 -18  -3  13    0.74    0.25
  18   3 -13    1.32    0.19
  18   3 -13    1.28    0.21
  18   3 -13    1.28    0.47
 -18  -3  14   -0.01    0.11
 -18  -3  14   -0.21    0.14
  18   3 -14    0.13    0.09
  18   3 -14   -0.14    0.09
  18   3 -14    0.13    0.41
 -18  -3  15    0.20    0.13
 -18  -3  15    0.11    0.16
  18   3 -15    0.07    0.11
  18   3 -15    0.31    0.11
  18   3 -15    0.05    0.41
 -18  -3  16   -0.10    0.14
  18   3 -16   -0.18    0.10
  18   3 -16   -0.11    0.16
  18   3 -16   -0.65    0.38
 -18  -3  17    2.11    0.28
 -18  -3  17    1.98    0.32
  18   3 -17    1.38    0.25
  18   3 -17    1.74    0.27
  18   3 -17    1.43    0.44
 -18  -3  18    0.37    0.16
 -18  -3  18    0.12    0.16
  18   3 -18    0.24    0.11
  18   3 -18    0.30    0.13
  18   3 -18   -0.28    0.31
 -18  -3  19    2.40    0.28
 -18  -3  19    1.97    0.30
  18   3 -19    1.50    0.25
  18   3 -19    1.25    0.26
 -18  -3  20    1.14    0.23
  18   3 -20    0.95    0.19
 -18  -3  21    1.82    0.29
  18   3 -21    1.27    0.25
 -18  -2   1    0.92    0.18
 -18  -2   1    0.84    0.17
 -18  -2   1    0.53    0.19
 -18  -2   1    0.45    0.20
  18   2  -1    0.74    0.13
  18   2  -1    0.89    0.19
  18   2  -1    0.80    0.16
  18   2  -1    1.31    0.36
 -18  -2   2    0.27    0.12
 -18  -2   2    0.41    0.15
 -18  -2   2    0.37    0.16
  18   2  -2    0.53    0.11
  18   2  -2    0.50    0.13
  18   2  -2    0.49    0.36
 -18  -2   3    0.14    0.12
 -18  -2   3    0.18    0.10
 -18  -2   3    0.06    0.13
 -18  -2   3    0.09    0.14
  18   2  -3   -0.10    0.09
  18   2  -3   -0.25    0.14
  18   2  -3    0.06    0.10
  18   2  -3    0.02    0.31
 -18  -2   4   -0.03    0.10
 -18  -2   4   -0.13    0.10
 -18  -2   4   -0.04    0.12
 -18  -2   4    0.14    0.13
  18   2  -4    0.04    0.09
  18   2  -4   -0.18    0.14
 -18  -2   5    0.76    0.14
 -18  -2   5    0.36    0.15
 -18  -2   5    0.52    0.14
 -18  -2   5    0.71    0.17
  18   2  -5    0.32    0.11
  18   2  -5    0.87    0.18
  18   2  -5    0.42    0.13
  18   2  -5    0.82    0.46
 -18  -2   6    2.31    0.34
 -18  -2   6    2.02    0.32
 -18  -2   6    1.87    0.32
 -18  -2   6    1.91    0.35
  18   2  -6    2.36    0.30
  18   2  -6    2.27    0.35
  18   2  -6    2.56    0.33
  18   2  -6    1.90    0.55
 -18  -2   7    0.04    0.12
 -18  -2   7    0.44    0.12
 -18  -2   7   -0.03    0.13
  18   2  -7    0.40    0.10
  18   2  -7    0.24    0.13
  18   2  -7    0.15    0.43
 -18  -2   8    8.90    1.17
 -18  -2   8    8.88    1.16
 -18  -2   8    8.45    1.15
 -18  -2   8    7.86    1.18
  18   2  -8    8.97    1.15
  18   2  -8   10.60    1.19
 -18  -2   9    1.23    0.23
 -18  -2   9    1.06    0.24
  18   2  -9    2.14    0.27
  18   2  -9    1.11    0.21
 -18  -2  10   14.07    1.84
 -18  -2  10   14.62    1.83
 -18  -2  10   13.84    1.85
  18   2 -10   13.82    1.82
  18   2 -10   14.27    1.84
 -18  -2  11    5.96    0.78
 -18  -2  11    5.54    0.76
 -18  -2  11    5.06    0.78
  18   2 -11    6.01    0.75
  18   2 -11    5.77    0.77
 -18  -2  12    6.34    0.87
 -18  -2  12    6.70    0.86
 -18  -2  12    6.40    0.89
  18   2 -12    6.47    0.85
  18   2 -12    6.63    0.86
  18   2 -12    5.50    1.01
 -18  -2  13   10.64    1.26
 -18  -2  13    9.23    1.28
  18   2 -13    9.77    1.24
  18   2 -13    8.63    1.25
  18   2 -13   10.21    1.41
 -18  -2  14    0.52    0.15
 -18  -2  14    0.72    0.20
  18   2 -14    0.51    0.12
  18   2 -14    0.54    0.14
  18   2 -14   -0.69    0.47
 -18  -2  15   11.45    1.42
 -18  -2  15   10.29    1.44
  18   2 -15   10.70    1.40
  18   2 -15   10.35    1.42
  18   2 -15   12.62    1.54
 -18  -2  16    0.20    0.15
 -18  -2  16    0.51    0.18
  18   2 -16    0.33    0.13
  18   2 -16    0.79    0.20
  18   2 -16    0.41    0.13
  18   2 -16    1.01    0.49
 -18  -2  17    5.54    0.79
 -18  -2  17    6.26    0.83
  18   2 -17    5.72    0.77
  18   2 -17    6.32    0.82
  18   2 -17    6.12    0.80
 -18  -2  18    0.30    0.15
 -18  -2  18   -0.10    0.14
  18   2 -18    0.02    0.11
  18   2 -18    0.29    0.11
  18   2 -18   -0.38    0.31
 -18  -2  19    1.70    0.29
 -18  -2  19    2.10    0.33
  18   2 -19    1.79    0.28
  18   2 -19    2.09    0.30
 -18  -2  20    0.51    0.18
 -18  -2  20    0.93    0.22
  18   2 -20    0.61    0.17
  18   2 -20    1.02    0.18
 -18  -2  21    0.39    0.19
  18   2 -21    0.70    0.17
 -18  -1   1   13.36    1.75
 -18  -1   1   13.42    1.75
 -18  -1   1   12.90    1.75
 -18  -1   1   13.37    1.77
  18   1  -1   13.48    1.74
  18   1  -1   14.80    1.77
  18   1  -1   13.78    1.76
  18   1  -1   13.23    1.83
 -18  -1   2    9.96    1.36
 -18  -1   2   10.15    1.34
 -18  -1   2   10.04    1.35
 -18  -1   2   10.32    1.37
  18   1  -2   10.41    1.34
  18   1  -2   11.05    1.37
  18   1  -2   10.35    1.35
  18   1  -2   12.22    1.49
 -18  -1   3    8.36    1.14
 -18  -1   3    8.30    1.13
 -18  -1   3    8.09    1.16
  18   1  -3    9.71    1.14
  18   1  -3    8.62    1.14
  18   1  -3   10.07    1.28
 -18  -1   4   19.31    2.63
 -18  -1   4   20.60    2.63
 -18  -1   4   19.98    2.63
 -18  -1   4   20.54    2.66
  18   1  -4   20.22    2.62
  18   1  -4   22.78    2.66
 -18  -1   5    4.70    0.64
 -18  -1   5    3.86    0.62
 -18  -1   5    4.60    0.63
 -18  -1   5    5.19    0.66
  18   1  -5    4.83    0.62
  18   1  -5    5.06    0.65
  18   1  -5    5.31    0.64
  18   1  -5    5.49    0.80
 -18  -1   6   16.76    2.11
 -18  -1   6   15.46    2.09
 -18  -1   6   16.07    2.10
 -18  -1   6   16.30    2.13
  18   1  -6   15.64    2.09
  18   1  -6   17.08    2.12
  18   1  -6   16.29    2.11
  18   1  -6   18.47    2.20
 -18  -1   7    0.42    0.15
 -18  -1   7    0.32    0.14
 -18  -1   7    0.81    0.14
 -18  -1   7    0.55    0.18
  18   1  -7    0.87    0.14
  18   1  -7    0.48    0.18
  18   1  -7    1.05    0.15
  18   1  -7    0.82    0.51
 -18  -1   8   10.62    1.46
 -18  -1   8   11.38    1.46
 -18  -1   8   10.95    1.46
  18   1  -8   14.50    1.60
 -18  -1   9    0.79    0.18
 -18  -1   9    1.22    0.22
  18   1  -9    0.68    0.21
  18   1  -9    0.82    0.17
 -18  -1  10    7.37    0.95
 -18  -1  10    6.85    0.93
 -18  -1  10    6.95    0.96
  18   1 -10    7.26    0.94
 -18  -1  11    1.66    0.26
 -18  -1  11    1.30    0.23
 -18  -1  11    1.52    0.28
  18   1 -11    1.54    0.22
  18   1 -11    1.44    0.24
 -18  -1  12    0.16    0.12
 -18  -1  12   -0.16    0.12
  18   1 -12    0.16    0.09
  18   1 -12    0.08    0.10
 -18  -1  13    0.11    0.13
 -18  -1  13   -0.10    0.16
  18   1 -13    0.45    0.12
  18   1 -13    0.64    0.14
  18   1 -13    1.03    0.29
 -18  -1  14    0.35    0.14
 -18  -1  14    0.19    0.15
  18   1 -14    0.26    0.11
  18   1 -14    0.24    0.11
  18   1 -14   -0.09    0.28
 -18  -1  15    0.59    0.14
 -18  -1  15    0.44    0.17
  18   1 -15    0.24    0.11
  18   1 -15    0.20    0.12
  18   1 -15    0.56    0.29
 -18  -1  16    0.20    0.18
  18   1 -16    0.48    0.19
  18   1 -16    0.09    0.12
  18   1 -16   -0.30    0.29
 -18  -1  17    2.64    0.36
  18   1 -17    2.32    0.34
  18   1 -17    2.49    0.41
  18   1 -17    2.58    0.45
 -18  -1  18   -0.15    0.16
  18   1 -18    0.02    0.11
  18   1 -18   -0.09    0.10
  18   1 -18    0.44    0.26
 -18  -1  19    1.43    0.26
 -18  -1  19    1.37    0.28
  18   1 -19    1.50    0.24
  18   1 -19    1.42    0.24
 -18  -1  20    0.45    0.14
 -18  -1  20    0.13    0.17
  18   1 -20    0.43    0.13
  18   1 -20    0.28    0.13
 -18  -1  21    2.03    0.36
  18   1 -21    2.51    0.35
 -18   0   1    5.14    0.72
 -18   0   1    5.41    0.76
  18   0  -1    5.49    0.72
  18   0  -1    5.70    0.74
  18   0  -1    5.21    0.73
  18   0  -1    7.37    0.90
 -18   0   2    0.70    0.14
 -18   0   2    0.59    0.14
 -18   0   2    0.45    0.14
 -18   0   2    0.46    0.17
  18   0  -2    0.62    0.11
  18   0  -2    0.39    0.16
  18   0  -2    0.48    0.14
  18   0  -2    0.39    0.46
 -18   0   3    0.85    0.17
 -18   0   3    0.83    0.15
 -18   0   3    0.14    0.17
  18   0  -3    0.87    0.14
  18   0  -3    0.78    0.16
  18   0  -3    2.39    0.47
 -18   0   4    0.20    0.11
 -18   0   4    0.10    0.12
 -18   0   4    0.17    0.11
 -18   0   4   -0.21    0.14
  18   0  -4    0.24    0.08
  18   0  -4    0.09    0.14
 -18   0   5    0.61    0.15
 -18   0   5    0.35    0.12
 -18   0   5   -0.01    0.12
 -18   0   5    0.57    0.17
  18   0  -5    0.60    0.10
  18   0  -5    0.40    0.16
  18   0  -5    0.14    0.11
  18   0  -5    0.78    0.41
 -18   0   6    3.58    0.51
 -18   0   6    3.48    0.54
  18   0  -6    4.19    0.51
  18   0  -6    3.65    0.53
  18   0  -6    3.91    0.52
  18   0  -6    3.97    0.64
 -18   0   7    1.31    0.25
 -18   0   7    1.66    0.24
 -18   0   7    1.68    0.24
 -18   0   7    1.94    0.29
  18   0  -7    1.70    0.23
  18   0  -7    1.52    0.28
  18   0  -7    1.20    0.24
  18   0  -7    1.99    0.37
 -18   0   8   14.29    1.86
 -18   0   8   14.66    1.86
 -18   0   8   14.80    1.86
  18   0  -8   14.13    1.85
  18   0  -8   15.66    1.88
  18   0  -8   12.73    1.87
 -18   0   9    0.07    0.12
  18   0  -9    0.14    0.15
 -18   0  10   18.48    2.38
 -18   0  10   18.91    2.38
 -18   0  10   17.77    2.40
  18   0 -10   17.48    2.36
  18   0 -10   20.01    2.40
  18   0 -10   18.32    2.38
 -18   0  11    1.11    0.20
 -18   0  11    1.08    0.18
 -18   0  11    0.85    0.22
  18   0 -11    1.21    0.17
  18   0 -11    0.53    0.18
 -18   0  12   10.39    1.35
 -18   0  12   10.51    1.38
  18   0 -12   10.20    1.34
  18   0 -12   10.43    1.36
 -18   0  13    6.28    0.82
 -18   0  13    6.10    0.85
  18   0 -13    6.15    0.81
  18   0 -13    6.47    0.83
  18   0 -13    5.83    0.84
 -18   0  14    7.40    1.02
 -18   0  14    7.97    1.06
  18   0 -14    7.77    1.02
  18   0 -14    8.30    1.04
  18   0 -14    7.74    1.05
 -18   0  15   12.90    1.65
 -18   0  15   12.57    1.68
  18   0 -15   12.42    1.64
  18   0 -15   13.36    1.67
  18   0 -15   11.92    1.66
  18   0 -15   13.55    1.67
 -18   0  16    4.70    0.65
  18   0 -16    4.45    0.63
  18   0 -16    4.17    0.61
  18   0 -16    4.72    0.64
 -18   0  17   10.50    1.28
  18   0 -17    9.59    1.27
  18   0 -17   10.22    1.30
  18   0 -17    8.93    1.28
 -18   0  18   -0.05    0.13
 -18   0  18    0.23    0.15
  18   0 -18    0.30    0.11
  18   0 -18   -0.02    0.10
  18   0 -18   -0.07    0.18
 -18   0  19    5.02    0.62
 -18   0  19    4.44    0.64
  18   0 -19    4.19    0.61
  18   0 -19    4.53    0.62
 -18   0  20    1.17    0.20
  18   0 -20    0.61    0.16
  18   0 -20    0.73    0.17
 -18   0  21    2.15    0.32
  18   0 -21    1.57    0.29
 -18   1   1   15.58    2.01
 -18   1   1   16.23    2.00
 -18   1   1   14.48    1.99
 -18   1   1   15.49    2.03
  18  -1  -1   16.15    2.00
  18  -1  -1   15.76    2.01
  18  -1  -1   15.41    2.01
  18  -1  -1   14.78    2.09
 -18   1   2    2.65    0.33
 -18   1   2    2.40    0.32
 -18   1   2    2.15    0.32
 -18   1   2    1.77    0.35
  18  -1  -2    2.41    0.31
  18  -1  -2    1.89    0.33
  18  -1  -2    2.23    0.33
  18  -1  -2    1.20    0.52
 -18   1   3   27.21    3.62
 -18   1   3   27.09    3.62
 -18   1   3   28.68    3.66
  18  -1  -3   27.93    3.62
  18  -1  -3   27.93    3.63
  18  -1  -3   33.31    3.71
 -18   1   4    6.98    0.93
 -18   1   4    7.55    0.93
 -18   1   4    6.46    0.92
 -18   1   4    6.70    0.95
  18  -1  -4    6.83    0.91
  18  -1  -4    8.31    0.95
 -18   1   5   29.65    3.72
 -18   1   5   27.55    3.70
 -18   1   5   30.85    3.72
 -18   1   5   28.77    3.73
  18  -1  -5   29.52    3.70
  18  -1  -5   26.76    3.71
  18  -1  -5   28.85    3.72
  18  -1  -5   29.58    3.73
 -18   1   6   11.63    1.60
 -18   1   6   12.76    1.60
 -18   1   6   12.93    1.60
 -18   1   6   11.79    1.62
  18  -1  -6   12.21    1.59
  18  -1  -6   14.27    1.63
  18  -1  -6   12.21    1.60
  18  -1  -6   11.27    1.60
 -18   1   7    4.69    0.59
 -18   1   7    3.62    0.57
 -18   1   7    4.77    0.58
 -18   1   7    4.64    0.62
  18  -1  -7    4.33    0.57
  18  -1  -7    5.13    0.60
  18  -1  -7    4.45    0.59
  18  -1  -7    3.54    0.59
 -18   1   8   22.19    2.78
 -18   1   8   21.14    2.76
 -18   1   8   22.07    2.77
 -18   1   8   23.59    2.81
  18  -1  -8   19.94    2.75
  18  -1  -8   21.11    2.77
 -18   1   9    0.24    0.12
  18  -1  -9    0.09    0.10
  18  -1  -9    0.29    0.15
 -18   1  10    8.82    1.10
 -18   1  10    7.36    1.08
 -18   1  10    8.34    1.11
  18  -1 -10    8.59    1.08
  18  -1 -10    8.33    1.10
  18  -1 -10    8.74    1.10
 -18   1  11    0.21    0.13
 -18   1  11   -0.04    0.12
 -18   1  11   -0.19    0.14
  18  -1 -11    0.29    0.10
  18  -1 -11   -0.20    0.11
 -18   1  12    0.67    0.17
 -18   1  12    0.88    0.21
  18  -1 -12    0.92    0.16
  18  -1 -12    1.00    0.18
 -18   1  13    0.01    0.11
 -18   1  13   -0.22    0.13
  18  -1 -13    0.05    0.10
  18  -1 -13   -0.07    0.10
  18  -1 -13    0.19    0.13
 -18   1  14   -0.14    0.13
 -18   1  14    0.59    0.18
  18  -1 -14    0.08    0.11
  18  -1 -14    0.17    0.12
  18  -1 -14    0.17    0.13
 -18   1  15    0.13    0.13
 -18   1  15    0.07    0.13
  18  -1 -15   -0.03    0.11
  18  -1 -15    0.11    0.17
  18  -1 -15   -0.20    0.11
  18  -1 -15    0.40    0.15
 -18   1  16    0.31    0.17
  18  -1 -16    0.63    0.17
  18  -1 -16    0.36    0.14
  18  -1 -16    0.49    0.17
 -18   1  17    1.20    0.22
  18  -1 -17    1.17    0.19
  18  -1 -17    1.27    0.26
  18  -1 -17    0.95    0.22
 -18   1  18    0.80    0.17
 -18   1  18    0.70    0.19
  18  -1 -18    0.46    0.15
  18  -1 -18    0.26    0.14
  18  -1 -18    0.40    0.17
 -18   1  19    2.67    0.32
  18  -1 -19    1.83    0.29
  18  -1 -19    1.71    0.31
 -18   1  20    0.14    0.14
 -18   1  20   -0.03    0.15
  18  -1 -20    0.16    0.14
  18  -1 -20    0.10    0.12
 -18   1  21    3.95    0.57
  18  -1 -21    3.87    0.55
 -18   2   1    8.06    1.16
 -18   2   1    9.10    1.16
 -18   2   1    8.72    1.15
 -18   2   1    9.36    1.19
  18  -2  -1    8.71    1.15
  18  -2  -1    8.49    1.17
  18  -2  -1    9.57    1.17
  18  -2  -1   10.29    1.23
 -18   2   2    0.04    0.12
 -18   2   2   -0.27    0.10
 -18   2   2   -0.10    0.11
 -18   2   2    0.08    0.12
  18  -2  -2   -0.02    0.10
  18  -2  -2    0.44    0.13
  18  -2  -2    0.00    0.09
  18  -2  -2    0.18    0.22
 -18   2   3    0.82    0.18
 -18   2   3    1.09    0.18
 -18   2   3    1.24    0.22
  18  -2  -3    0.81    0.16
  18  -2  -3    0.96    0.18
  18  -2  -3    1.24    0.24
 -18   2   4    0.24    0.11
 -18   2   4    0.28    0.12
 -18   2   4    0.02    0.10
 -18   2   4   -0.04    0.13
  18  -2  -4    0.09    0.08
  18  -2  -4    0.20    0.14
 -18   2   5    1.23    0.21
 -18   2   5    0.96    0.20
 -18   2   5    1.23    0.20
 -18   2   5    1.20    0.24
  18  -2  -5    1.16    0.19
  18  -2  -5    1.30    0.22
  18  -2  -5    1.16    0.21
  18  -2  -5    1.31    0.24
 -18   2   6    4.39    0.61
 -18   2   6    4.71    0.60
 -18   2   6    4.24    0.60
 -18   2   6    4.18    0.63
  18  -2  -6    4.86    0.60
  18  -2  -6    4.36    0.62
  18  -2  -6    4.66    0.61
  18  -2  -6    4.41    0.61
 -18   2   7    3.10    0.51
 -18   2   7    3.57    0.50
 -18   2   7    4.23    0.51
 -18   2   7    3.45    0.53
  18  -2  -7    3.76    0.52
  18  -2  -7    4.23    0.52
 -18   2   8   10.35    1.47
 -18   2   8   12.16    1.48
 -18   2   8   11.07    1.47
 -18   2   8   11.37    1.50
  18  -2  -8   10.89    1.46
  18  -2  -8   12.57    1.49
 -18   2   9    1.81    0.33
  18  -2  -9    2.67    0.35
 -18   2  10   12.57    1.75
 -18   2  10   14.57    1.75
 -18   2  10   14.26    1.78
  18  -2 -10   13.10    1.73
  18  -2 -10   13.74    1.76
  18  -2 -10   13.00    1.75
 -18   2  11    0.06    0.12
 -18   2  11    0.43    0.16
  18  -2 -11    0.38    0.10
  18  -2 -11    0.18    0.12
 -18   2  12   14.94    1.85
 -18   2  12   14.83    1.88
  18  -2 -12   14.50    1.84
  18  -2 -12   12.99    1.85
 -18   2  13    1.49    0.22
 -18   2  13    1.16    0.24
  18  -2 -13    1.20    0.21
  18  -2 -13    1.02    0.20
  18  -2 -13    1.07    0.22
 -18   2  14   21.42    2.70
 -18   2  14   22.63    2.75
  18  -2 -14   19.06    2.68
  18  -2 -14   20.20    2.71
  18  -2 -14   22.75    2.71
 -18   2  15    4.73    0.62
 -18   2  15    4.52    0.65
  18  -2 -15    4.32    0.61
  18  -2 -15    4.73    0.64
 -18   2  16   13.30    1.70
  18  -2 -16   12.26    1.67
  18  -2 -16   12.83    1.66
 -18   2  17    6.79    0.90
  18  -2 -17    6.56    0.89
  18  -2 -17    7.00    0.92
  18  -2 -17    6.47    0.91
  18  -2 -17    7.05    0.90
 -18   2  18    1.69    0.28
 -18   2  18    1.90    0.31
  18  -2 -18    1.68    0.27
  18  -2 -18    1.77    0.28
  18  -2 -18    1.83    0.29
 -18   2  19    4.34    0.57
 -18   2  19    4.04    0.60
  18  -2 -19    3.98    0.57
  18  -2 -19    4.30    0.58
 -18   2  20    0.14    0.15
 -18   2  20    0.10    0.16
  18  -2 -20    0.14    0.11
  18  -2 -20    0.25    0.12
 -18   2  21    1.89    0.33
  18  -2 -21    2.08    0.33
 -18   3   1   18.10    2.39
 -18   3   1   19.59    2.43
  18  -3  -1   19.18    2.40
  18  -3  -1   18.20    2.40
  18  -3  -1   20.03    2.42
  18  -3  -1   17.09    2.40
 -18   3   2    0.75    0.19
 -18   3   2    0.51    0.17
 -18   3   2    1.36    0.18
 -18   3   2    1.93    0.25
  18  -3  -2    1.05    0.18
  18  -3  -2    0.93    0.20
  18  -3  -2    1.17    0.19
  18  -3  -2    0.97    0.21
 -18   3   3   41.22    5.30
 -18   3   3   41.34    5.31
 -18   3   3   42.57    5.34
  18  -3  -3   39.55    5.29
  18  -3  -3   42.39    5.32
  18  -3  -3   41.75    5.31
 -18   3   4    0.22    0.12
 -18   3   4    0.22    0.12
 -18   3   4    0.06    0.11
 -18   3   4    0.30    0.16
  18  -3  -4    0.04    0.09
  18  -3  -4   -0.13    0.13
  18  -3  -4    0.30    0.13
 -18   3   5   43.28    5.30
 -18   3   5   41.36    5.31
  18  -3  -5   38.05    5.26
  18  -3  -5   42.56    5.30
  18  -3  -5   39.12    5.28
  18  -3  -5   44.51    5.31
 -18   3   6    3.97    0.52
 -18   3   6    4.15    0.51
 -18   3   6    3.74    0.52
 -18   3   6    3.36    0.54
  18  -3  -6    3.53    0.50
  18  -3  -6    3.95    0.53
  18  -3  -6    3.64    0.52
  18  -3  -6    3.75    0.52
 -18   3   7   13.70    1.66
 -18   3   7   11.85    1.64
 -18   3   7   12.18    1.65
 -18   3   7   12.23    1.67
  18  -3  -7   12.88    1.64
  18  -3  -7   13.59    1.67
  18  -3  -7   13.38    1.67
  18  -3  -7   12.53    1.65
 -18   3   8   14.80    1.91
 -18   3   8   14.32    1.89
 -18   3   8   15.06    1.90
 -18   3   8   14.33    1.93
  18  -3  -8   14.38    1.89
  18  -3  -8   14.48    1.91
  18  -3  -8   15.03    1.91
  18  -3  -8   15.18    1.91
 -18   3   9    7.62    0.98
  18  -3  -9    7.13    0.98
 -18   3  10    3.86    0.54
 -18   3  10    3.55    0.54
 -18   3  10    4.96    0.59
  18  -3 -10    3.61    0.53
  18  -3 -10    5.09    0.57
 -18   3  11    1.10    0.23
 -18   3  11    1.49    0.28
  18  -3 -11    1.35    0.22
  18  -3 -11    2.56    0.27
 -18   3  12    0.51    0.15
 -18   3  12    0.58    0.18
  18  -3 -12    0.57    0.14
  18  -3 -12    0.56    0.14
 -18   3  13    0.04    0.12
 -18   3  13   -0.03    0.13
  18  -3 -13    0.17    0.10
  18  -3 -13    0.02    0.11
  18  -3 -13   -0.09    0.13
 -18   3  14    0.17    0.13
 -18   3  14    0.35    0.14
  18  -3 -14    0.11    0.10
  18  -3 -14    0.31    0.17
  18  -3 -14    0.32    0.13
  18  -3 -14   -0.15    0.13
 -18   3  15    0.26    0.13
 -18   3  15    0.01    0.14
  18  -3 -15    0.24    0.12
  18  -3 -15    0.65    0.16
  18  -3 -15    0.19    0.12
  18  -3 -15    0.51    0.13
  18  -3 -16    0.80    0.22
  18  -3 -16    0.89    0.19
 -18   3  17    0.14    0.16
  18  -3 -17    0.29    0.12
  18  -3 -17    0.64    0.19
  18  -3 -17    0.31    0.13
  18  -3 -17    0.21    0.12
 -18   3  18    1.57    0.23
 -18   3  18    1.18    0.27
  18  -3 -18    1.23    0.23
 -18   3  19    1.81    0.24
 -18   3  19    1.17    0.27
  18  -3 -19    1.78    0.24
  18  -3 -19    0.95    0.24
 -18   3  20    0.29    0.15
 -18   3  20    0.92    0.20
  18  -3 -20    0.26    0.15
  18  -3 -20    0.65    0.16
 -18   4   1    3.62    0.50
 -18   4   1    3.79    0.49
 -18   4   1    3.27    0.50
 -18   4   1    3.48    0.53
  18  -4  -1    3.53    0.49
  18  -4  -1    3.46    0.50
  18  -4  -1    4.13    0.51
  18  -4  -1    3.89    0.52
 -18   4   2    0.41    0.16
 -18   4   2    0.46    0.14
 -18   4   2    0.49    0.14
 -18   4   2    0.53    0.17
  18  -4  -2    0.54    0.13
  18  -4  -2    0.71    0.16
  18  -4  -2    0.63    0.15
  18  -4  -2    1.00    0.18
 -18   4   3    0.01    0.10
 -18   4   3    0.10    0.11
 -18   4   3    0.14    0.14
  18  -4  -3    0.21    0.11
  18  -4  -3   -0.06    0.11
  18  -4  -3    0.07    0.13
 -18   4   4    1.70    0.27
 -18   4   4    1.57    0.25
 -18   4   4    1.26    0.26
 -18   4   4    1.87    0.29
  18  -4  -4    2.21    0.28
  18  -4  -4    1.86    0.28
 -18   4   5    3.16    0.46
 -18   4   5    3.46    0.45
 -18   4   5    3.09    0.46
 -18   4   5    2.95    0.48
  18  -4  -5    3.13    0.45
  18  -4  -5    3.46    0.47
  18  -4  -5    3.34    0.47
  18  -4  -5    3.75    0.46
 -18   4   6    1.65    0.33
 -18   4   6    2.50    0.33
 -18   4   6    2.13    0.33
 -18   4   6    2.48    0.36
  18  -4  -6    2.34    0.32
  18  -4  -6    2.20    0.35
  18  -4  -6    2.47    0.34
  18  -4  -6    2.41    0.34
 -18   4   7    4.84    0.62
 -18   4   7    4.65    0.61
 -18   4   7    4.50    0.62
 -18   4   7    4.49    0.64
  18  -4  -7    4.65    0.61
  18  -4  -7    4.57    0.63
  18  -4  -7    4.37    0.62
  18  -4  -7    4.47    0.62
 -18   4   8    4.88    0.71
 -18   4   8    5.04    0.70
 -18   4   8    5.46    0.71
 -18   4   8    5.13    0.73
  18  -4  -8    5.79    0.70
  18  -4  -8    5.52    0.72
  18  -4  -8    4.82    0.71
  18  -4  -8    5.52    0.71
 -18   4   9    4.34    0.68
  18  -4  -9    6.12    0.70
 -18   4  10    8.18    1.03
 -18   4  10    8.14    1.01
 -18   4  10    7.00    1.04
  18  -4 -10    7.91    1.01
  18  -4 -10    7.20    1.02
 -18   4  11    3.65    0.53
 -18   4  11    4.18    0.57
  18  -4 -11    3.98    0.53
  18  -4 -11    4.12    0.55
 -18   4  12   12.79    1.60
 -18   4  12   12.48    1.64
  18  -4 -12   12.10    1.60
  18  -4 -12   12.08    1.61
 -18   4  13    0.78    0.14
  18  -4 -13    0.60    0.13
  18  -4 -13    0.40    0.14
  18  -4 -13    0.27    0.15
 -18   4  14   18.75    2.32
  18  -4 -14   16.60    2.30
  18  -4 -14   18.83    2.34
  18  -4 -14   17.93    2.33
  18  -4 -14   18.11    2.32
 -18   4  15    0.08    0.12
  18  -4 -15    0.13    0.11
  18  -4 -15   -0.05    0.15
  18  -4 -15    0.16    0.12
  18  -4 -15    0.06    0.14
 -18   4  16   11.87    1.55
  18  -4 -16   11.62    1.54
  18  -4 -16   13.28    1.57
  18  -4 -16   11.17    1.55
 -18   4  17    0.66    0.17
 -18   4  17    0.98    0.21
  18  -4 -17    0.72    0.17
  18  -4 -17    0.84    0.23
  18  -4 -17    0.95    0.18
  18  -4 -17    0.91    0.19
 -18   4  18    3.16    0.43
 -18   4  18    2.43    0.44
  18  -4 -18    3.28    0.43
  18  -4 -18    2.92    0.44
 -18   4  19    2.84    0.37
 -18   4  19    2.81    0.40
  18  -4 -19    2.15    0.36
  18  -4 -19    2.22    0.37
 -18   4  20    0.78    0.20
  18  -4 -20    0.82    0.18
 -18   5   1   18.68    2.52
 -18   5   1   21.71    2.53
 -18   5   1   17.50    2.52
 -18   5   1   20.21    2.55
  18  -5  -1   19.13    2.52
  18  -5  -1   20.18    2.53
  18  -5  -1   20.32    2.54
  18  -5  -1   20.01    2.53
 -18   5   2    8.64    1.18
 -18   5   2    9.17    1.19
 -18   5   2    9.95    1.22
  18  -5  -2    9.08    1.18
  18  -5  -2    9.40    1.20
  18  -5  -2    8.88    1.19
 -18   5   3   32.28    3.96
 -18   5   3   33.57    3.96
 -18   5   3   29.55    3.94
 -18   5   3   29.17    3.96
  18  -5  -3   29.39    3.93
  18  -5  -3   34.39    3.97
  18  -5  -3   31.35    3.96
  18  -5  -3   27.89    3.93
 -18   5   4    2.87    0.39
 -18   5   4    2.40    0.38
 -18   5   4    2.89    0.39
 -18   5   4    3.19    0.43
  18  -5  -4    2.94    0.38
  18  -5  -4    2.48    0.39
  18  -5  -4    2.73    0.40
  18  -5  -4    2.74    0.39
 -18   5   5   25.28    3.28
 -18   5   5   25.38    3.27
 -18   5   5   25.49    3.28
 -18   5   5   25.60    3.30
  18  -5  -5   24.78    3.26
  18  -5  -5   26.16    3.28
  18  -5  -5   25.63    3.29
  18  -5  -5   25.47    3.28
 -18   5   6   -0.08    0.11
 -18   5   6    0.24    0.11
 -18   5   6    0.09    0.11
 -18   5   6   -0.05    0.13
  18  -5  -6    0.03    0.10
  18  -5  -6   -0.14    0.12
 -18   5   7   14.26    1.91
 -18   5   7   13.42    1.90
 -18   5   7   15.44    1.92
 -18   5   7   15.11    1.95
  18  -5  -7   16.42    1.94
  18  -5  -7   15.16    1.92
 -18   5   8    0.86    0.16
 -18   5   8    0.83    0.15
 -18   5   8    0.71    0.16
  18  -5  -8    0.34    0.14
  18  -5  -8    0.86    0.16
  18  -5  -8    0.41    0.16
 -18   5   9    9.80    1.37
 -18   5   9    9.93    1.36
 -18   5   9   10.07    1.39
  18  -5  -9   11.13    1.37
  18  -5  -9   11.11    1.38
  18  -5  -9   11.23    1.39
 -18   5  10    0.16    0.10
 -18   5  10    0.03    0.13
  18  -5 -10    0.14    0.10
  18  -5 -10    0.02    0.11
 -18   5  11    3.82    0.54
  18  -5 -11    4.15    0.54
  18  -5 -11    3.99    0.56
 -18   5  12    0.46    0.17
 -18   5  12    0.90    0.19
  18  -5 -12    0.50    0.16
  18  -5 -12    1.30    0.19
  18  -5 -12    1.13    0.19
 -18   5  13    0.14    0.12
 -18   5  13    0.48    0.18
  18  -5 -13    0.51    0.13
  18  -5 -13    0.37    0.13
  18  -5 -13    0.53    0.16
 -18   5  14    0.47    0.15
 -18   5  14    1.10    0.21
  18  -5 -14    0.65    0.15
  18  -5 -14    0.52    0.18
  18  -5 -14    0.59    0.16
  18  -5 -14    0.62    0.16
 -18   5  15    0.06    0.13
  18  -5 -15    0.22    0.14
  18  -5 -15    0.33    0.16
  18  -5 -15   -0.08    0.13
  18  -5 -15   -0.03    0.12
 -18   5  16    0.83    0.16
 -18   5  16    0.39    0.18
  18  -5 -16    0.45    0.15
  18  -5 -16    0.18    0.18
  18  -5 -16    0.46    0.16
 -18   5  17   -0.07    0.11
 -18   5  17    0.24    0.15
  18  -5 -17   -0.27    0.11
  18  -5 -17    0.19    0.12
  18  -5 -17    0.20    0.13
 -18   5  18    1.50    0.21
 -18   5  18    0.87    0.22
  18  -5 -18    1.55    0.22
  18  -5 -18    0.82    0.21
 -18   5  19    0.41    0.16
 -18   5  19    0.55    0.17
  18  -5 -19    0.89    0.17
  18  -5 -19    0.39    0.15
 -18   5  20    0.67    0.19
  18  -5 -20    0.44    0.16
 -18   6   1    0.68    0.15
 -18   6   1    0.66    0.16
 -18   6   1    0.59    0.19
  18  -6  -1    0.71    0.15
  18  -6  -1    1.05    0.18
  18  -6  -1    0.99    0.18
 -18   6   2    0.49    0.13
 -18   6   2    0.27    0.12
 -18   6   2    0.63    0.14
 -18   6   2    0.06    0.14
  18  -6  -2    0.58    0.13
  18  -6  -2    0.45    0.13
  18  -6  -2    0.64    0.15
 -18   6   3    0.19    0.11
 -18   6   3    0.46    0.12
 -18   6   3    0.17    0.12
 -18   6   3    0.17    0.16
  18  -6  -3    0.76    0.12
  18  -6  -3    0.39    0.12
  18  -6  -3    0.30    0.12
  18  -6  -3    0.28    0.14
 -18   6   4    2.70    0.38
 -18   6   4    3.09    0.41
  18  -6  -4    2.74    0.37
  18  -6  -4    2.56    0.38
  18  -6  -4    2.19    0.38
  18  -6  -4    2.64    0.39
 -18   6   5    6.52    0.88
 -18   6   5    6.93    0.88
 -18   6   5    5.98    0.88
 -18   6   5    6.34    0.90
  18  -6  -5    6.60    0.87
  18  -6  -5    7.63    0.89
  18  -6  -5    6.49    0.89
  18  -6  -5    7.00    0.89
 -18   6   6    0.47    0.13
 -18   6   6    0.76    0.13
 -18   6   6    0.38    0.13
 -18   6   6    0.15    0.17
  18  -6  -6    0.84    0.13
  18  -6  -6    0.44    0.14
  18  -6  -6    0.45    0.14
  18  -6  -6    0.24    0.16
 -18   6   7    5.32    0.73
 -18   6   7    5.85    0.72
 -18   6   7    4.59    0.72
 -18   6   7    5.19    0.75
  18  -6  -7    6.09    0.72
  18  -6  -7    6.08    0.74
  18  -6  -7    4.53    0.73
  18  -6  -7    5.99    0.74
 -18   6   8    0.27    0.13
 -18   6   8    0.02    0.11
  18  -6  -8    0.37    0.15
  18  -6  -8    0.24    0.13
 -18   6   9    6.70    0.92
 -18   6   9    7.20    0.92
 -18   6   9    8.09    0.97
  18  -6  -9    6.66    0.91
  18  -6  -9    6.79    0.93
 -18   6  10    2.78    0.36
 -18   6  10    3.22    0.41
  18  -6 -10    2.34    0.35
  18  -6 -10    2.13    0.37
 -18   6  11    9.20    1.13
 -18   6  11    8.45    1.16
  18  -6 -11    8.21    1.12
  18  -6 -11    8.57    1.14
 -18   6  12   11.53    1.36
 -18   6  12    9.83    1.38
  18  -6 -12   10.13    1.34
  18  -6 -12    9.92    1.36
  18  -6 -12   10.22    1.36
 -18   6  13    4.95    0.65
 -18   6  13    4.80    0.69
  18  -6 -13    4.62    0.65
  18  -6 -13    4.33    0.66
  18  -6 -13    4.85    0.67
  18  -6 -13    5.63    0.67
 -18   6  14   11.69    1.44
 -18   6  14    9.79    1.45
  18  -6 -14   11.19    1.43
  18  -6 -14   11.43    1.45
  18  -6 -14   11.28    1.45
  18  -6 -14   10.59    1.44
  18  -6 -15    0.35    0.18
  18  -6 -15    0.32    0.15
 -18   6  16    8.25    1.11
  18  -6 -16    8.20    1.08
  18  -6 -16    8.46    1.10
  18  -6 -16    8.19    1.10
 -18   6  17    0.04    0.14
 -18   6  17    0.04    0.15
  18  -6 -17    0.17    0.14
 -18   6  18    2.89    0.40
 -18   6  18    2.82    0.43
  18  -6 -18    2.69    0.41
  18  -6 -18    3.04    0.42
 -18   6  19    0.53    0.16
 -18   6  19    0.59    0.18
  18  -6 -19    0.77    0.16
  18  -6 -19    0.56    0.16
 -18   7   1   13.55    1.47
 -18   7   1   10.41    1.46
  18  -7  -1   10.54    1.45
  18  -7  -1   11.15    1.47
  18  -7  -1   10.99    1.46
 -18   7   2   16.20    2.06
 -18   7   2   14.99    2.05
 -18   7   2   16.08    2.07
  18  -7  -2   17.22    2.07
  18  -7  -2   15.06    2.06
  18  -7  -2   16.44    2.08
  18  -7  -2   16.15    2.07
 -18   7   3   20.51    2.70
 -18   7   3   21.34    2.69
  18  -7  -3   21.26    2.70
  18  -7  -3   19.37    2.69
  18  -7  -3   21.67    2.72
  18  -7  -3   21.91    2.71
 -18   7   4    6.75    0.91
 -18   7   4    5.54    0.90
 -18   7   4    6.71    0.91
  18  -7  -4    7.73    0.91
  18  -7  -4    7.34    0.91
  18  -7  -4    7.43    0.93
  18  -7  -4    7.95    0.93
 -18   7   5   13.72    1.72
 -18   7   5   13.15    1.71
 -18   7   5   12.76    1.74
 -18   7   5   12.63    1.71
  18  -7  -5   12.33    1.70
  18  -7  -5   14.60    1.73
  18  -7  -5   13.71    1.73
  18  -7  -5   13.36    1.72
 -18   7   6    0.72    0.15
 -18   7   6    0.59    0.14
 -18   7   6    0.61    0.18
 -18   7   6    0.35    0.15
  18  -7  -6    1.04    0.15
  18  -7  -6    0.95    0.16
 -18   7   7   10.50    1.35
 -18   7   7   10.29    1.34
 -18   7   7   10.32    1.35
  18  -7  -7   10.21    1.35
 -18   7   8    0.06    0.10
 -18   7   8   -0.07    0.10
 -18   7   8    0.10    0.14
 -18   7   8    0.02    0.10
  18  -7  -8    0.07    0.10
  18  -7  -8    0.02    0.11
  18  -7  -8   -0.08    0.12
 -18   7   9   10.05    1.40
 -18   7   9   10.48    1.39
 -18   7   9   11.96    1.44
  18  -7  -9   10.22    1.39
  18  -7  -9   11.83    1.42
 -18   7  10   -0.13    0.10
 -18   7  10   -0.10    0.14
  18  -7 -10    0.12    0.11
  18  -7 -10    0.13    0.12
 -18   7  11    1.93    0.33
 -18   7  11    2.66    0.37
  18  -7 -11    2.48    0.34
  18  -7 -11    2.58    0.36
 -18   7  12    0.99    0.19
 -18   7  12    1.09    0.23
  18  -7 -12    0.68    0.18
  18  -7 -12    1.53    0.22
  18  -7 -12    1.15    0.22
 -18   7  13    0.43    0.12
 -18   7  13    0.45    0.16
  18  -7 -13    0.31    0.13
  18  -7 -13    0.06    0.16
  18  -7 -13    0.38    0.15
  18  -7 -13    0.65    0.16
 -18   7  14   -0.04    0.13
 -18   7  14   -0.19    0.13
  18  -7 -14   -0.22    0.13
  18  -7 -14   -0.28    0.15
  18  -7 -14    0.15    0.13
  18  -7 -14    0.19    0.13
 -18   7  15    0.19    0.14
  18  -7 -15    0.33    0.13
  18  -7 -15    0.17    0.16
  18  -7 -15   -0.17    0.13
  18  -7 -15    0.36    0.15
 -18   7  16    0.67    0.16
 -18   7  16    0.75    0.17
  18  -7 -16    0.70    0.16
  18  -7 -16    0.27    0.17
 -18   7  17    0.05    0.13
 -18   7  17    0.10    0.13
  18  -7 -17    0.12    0.14
  18  -7 -17   -0.10    0.12
 -18   7  18    1.07    0.19
 -18   7  18    0.67    0.20
  18  -7 -18    1.03    0.20
  18  -7 -18    0.83    0.19
 -18   8   1    0.13    0.11
 -18   8   1    0.30    0.13
 -18   8   1    0.18    0.16
 -18   8   1    0.52    0.12
  18  -8  -1    0.03    0.12
  18  -8  -1    0.47    0.11
  18  -8  -1    0.57    0.15
  18  -8  -1    0.62    0.15
 -18   8   2    1.79    0.27
 -18   8   2    1.79    0.25
  18  -8  -2    1.44    0.23
  18  -8  -2    1.62    0.24
  18  -8  -2    1.76    0.26
  18  -8  -2    0.98    0.24
 -18   8   3    0.30    0.11
 -18   8   3    0.11    0.12
 -18   8   3    0.52    0.17
  18  -8  -3    0.20    0.12
  18  -8  -3    0.19    0.11
  18  -8  -3    0.11    0.13
  18  -8  -3    0.70    0.15
 -18   8   4    0.19    0.12
 -18   8   4    0.17    0.10
 -18   8   4    0.13    0.15
 -18   8   4    0.50    0.12
  18  -8  -4    0.28    0.11
  18  -8  -4    0.32    0.12
  18  -8  -4    0.39    0.12
  18  -8  -4   -0.13    0.14
 -18   8   5    1.33    0.19
 -18   8   5    1.36    0.19
 -18   8   5    1.15    0.23
 -18   8   5    0.57    0.18
  18  -8  -5    1.23    0.21
  18  -8  -5    1.09    0.22
 -18   8   6    1.12    0.21
 -18   8   6    1.21    0.20
 -18   8   6    1.04    0.25
 -18   8   6    1.31    0.21
  18  -8  -6    1.50    0.21
  18  -8  -6    1.15    0.22
  18  -8  -6    1.27    0.24
  18  -8  -6    1.52    0.25
 -18   8   7    1.34    0.24
 -18   8   7    1.26    0.27
 -18   8   7    1.32    0.23
  18  -8  -7    2.08    0.26
  18  -8  -7    1.54    0.26
  18  -8  -7    1.44    0.26
 -18   8   8    0.08    0.11
 -18   8   8    0.37    0.11
 -18   8   8    0.20    0.14
 -18   8   8    0.30    0.13
  18  -8  -8    0.18    0.10
  18  -8  -8    0.17    0.13
 -18   8   9    7.89    1.19
 -18   8   9    9.80    1.19
 -18   8   9    9.16    1.21
  18  -8  -9    9.93    1.19
  18  -8  -9    8.58    1.20
 -18   8  10    1.77    0.25
 -18   8  10    1.46    0.27
  18  -8 -10    1.55    0.25
  18  -8 -10    1.35    0.26
 -18   8  11   12.16    1.56
 -18   8  11   11.88    1.59
  18  -8 -11   12.28    1.56
  18  -8 -11   11.75    1.58
 -18   8  12    5.96    0.73
 -18   8  12    4.45    0.73
  18  -8 -12    5.79    0.73
  18  -8 -12    5.10    0.74
  18  -8 -12    5.64    0.74
 -18   8  13    5.09    0.67
 -18   8  13    4.33    0.69
  18  -8 -13    5.14    0.67
  18  -8 -13    5.42    0.68
  18  -8 -13    4.69    0.69
  18  -8 -13    5.32    0.69
  18  -8 -14    5.97    0.77
  18  -8 -14    5.37    0.76
 -18   8  15    2.03    0.30
  18  -8 -15    1.62    0.28
  18  -8 -15    2.34    0.32
  18  -8 -15    2.13    0.31
  18  -8 -15    1.43    0.31
 -18   8  16    4.58    0.53
 -18   8  16    3.32    0.53
  18  -8 -16    3.37    0.51
  18  -8 -16    3.72    0.54
 -18   8  17    0.50    0.17
 -18   8  17    0.59    0.17
  18  -8 -17    0.43    0.15
  18  -8 -17    0.55    0.16
 -18   8  18    2.31    0.33
 -18   8  18    1.91    0.34
  18  -8 -18    2.26    0.33
  18  -8 -18    1.78    0.33
 -18   9   1    1.54    0.25
 -18   9   1    2.39    0.27
 -18   9   1    1.64    0.27
 -18   9   1    1.47    0.25
  18  -9  -1    1.04    0.24
  18  -9  -1    1.65    0.25
  18  -9  -1    1.98    0.28
  18  -9  -1    1.87    0.28
 -18   9   2   18.67    2.45
 -18   9   2   20.43    2.46
 -18   9   2   17.53    2.46
 -18   9   2   19.18    2.46
  18  -9  -2   19.35    2.45
  18  -9  -2   19.30    2.45
  18  -9  -2   19.77    2.48
  18  -9  -2   18.10    2.46
 -18   9   3    6.63    0.77
 -18   9   3    6.42    0.77
 -18   9   3    5.42    0.78
 -18   9   3    4.52    0.76
  18  -9  -3    5.83    0.78
  18  -9  -3    5.98    0.78
 -18   9   4   13.49    1.86
 -18   9   4   14.22    1.86
 -18   9   4   14.12    1.89
 -18   9   4   14.24    1.87
  18  -9  -4   14.95    1.87
  18  -9  -4   14.57    1.87
  18  -9  -4   14.75    1.88
  18  -9  -4   15.27    1.88
 -18   9   5    9.25    1.25
 -18   9   5   10.37    1.26
 -18   9   5   10.88    1.29
 -18   9   5    9.70    1.26
  18  -9  -5    8.92    1.25
  18  -9  -5    8.70    1.25
  18  -9  -5   10.37    1.28
  18  -9  -5    9.64    1.27
 -18   9   6    5.09    0.67
 -18   9   6    4.40    0.66
  18  -9  -6    4.82    0.67
  18  -9  -6    5.98    0.69
 -18   9   7   12.55    1.70
 -18   9   7   13.27    1.70
 -18   9   7   12.38    1.72
 -18   9   7   13.52    1.70
  18  -9  -7   13.17    1.70
  18  -9  -7   13.83    1.72
 -18   9   8    1.25    0.21
 -18   9   8    1.28    0.22
 -18   9   8    1.29    0.23
 -18   9   8    1.29    0.22
  18  -9  -8    1.34    0.21
  18  -9  -8    0.85    0.22
 -18   9   9    7.77    1.13
 -18   9   9    8.80    1.16
  18  -9  -9    8.80    1.14
  18  -9  -9   10.28    1.17
 -18   9  10    0.05    0.11
 -18   9  10    0.07    0.12
  18  -9 -10   -0.02    0.12
  18  -9 -10   -0.08    0.12
 -18   9  11    1.02    0.22
 -18   9  11    2.04    0.27
  18  -9 -11    1.40    0.23
  18  -9 -11    1.18    0.24
 -18   9  12    0.23    0.15
 -18   9  12    0.65    0.18
  18  -9 -12    0.62    0.16
  18  -9 -12    0.56    0.16
  18  -9 -12    0.36    0.14
  18  -9 -13    0.66    0.18
  18  -9 -13    1.37    0.21
 -18   9  14   -0.04    0.14
 -18   9  14   -0.26    0.14
  18  -9 -14    0.09    0.14
  18  -9 -14    0.06    0.12
  18  -9 -14    0.24    0.14
  18  -9 -14    0.19    0.13
  18  -9 -15   -0.07    0.12
  18  -9 -15   -0.05    0.13
 -18   9  16    1.04    0.19
 -18   9  16    0.81    0.20
  18  -9 -16    0.59    0.19
 -18   9  17    0.37    0.16
 -18   9  17    0.50    0.16
  18  -9 -17    0.41    0.14
  18  -9 -17    0.07    0.13
 -18  10   1    0.03    0.10
 -18  10   1   -0.01    0.11
 -18  10   1    0.13    0.12
 -18  10   1   -0.09    0.10
  18 -10  -1   -0.10    0.11
  18 -10  -1    0.05    0.11
  18 -10  -1    0.01    0.13
  18 -10  -1    0.17    0.14
 -18  10   2    5.13    0.76
 -18  10   2    4.98    0.76
 -18  10   2    6.01    0.79
 -18  10   2    6.07    0.77
  18 -10  -2    5.71    0.77
  18 -10  -2    6.54    0.77
  18 -10  -2    6.80    0.80
  18 -10  -2    5.84    0.78
 -18  10   3    0.12    0.13
 -18  10   3   -0.08    0.10
  18 -10  -3   -0.06    0.12
  18 -10  -3    0.05    0.09
  18 -10  -3   -0.01    0.11
  18 -10  -3    0.02    0.13
 -18  10   4    0.56    0.17
 -18  10   4    0.78    0.15
  18 -10  -4    0.55    0.16
  18 -10  -4    0.55    0.15
  18 -10  -4    0.96    0.18
  18 -10  -4    0.68    0.17
 -18  10   5    0.22    0.11
 -18  10   5    0.26    0.10
  18 -10  -5   -0.13    0.12
  18 -10  -5    0.01    0.13
 -18  10   6    2.00    0.30
 -18  10   6    2.34    0.31
 -18  10   6    2.25    0.33
 -18  10   6    1.90    0.30
  18 -10  -6    1.94    0.31
  18 -10  -6    1.71    0.31
 -18  10   7    0.88    0.19
 -18  10   7    1.48    0.19
 -18  10   7    0.45    0.20
 -18  10   7    0.72    0.18
  18 -10  -7    1.39    0.20
  18 -10  -7    0.88    0.20
 -18  10   8    0.17    0.13
 -18  10   8    0.08    0.14
  18 -10  -8    0.30    0.14
  18 -10  -8    0.30    0.13
 -18  10   9    9.94    1.10
 -18  10   9    7.10    1.10
  18 -10  -9    7.77    1.09
  18 -10  -9    8.78    1.12
 -18  10  10    0.92    0.16
 -18  10  10    0.85    0.19
  18 -10 -10    0.38    0.14
  18 -10 -10    0.43    0.17
 -18  10  11   11.15    1.34
 -18  10  11    9.11    1.34
  18 -10 -11   10.15    1.33
  18 -10 -11   10.19    1.35
 -18  10  12    0.85    0.20
 -18  10  12    1.06    0.22
  18 -10 -12    0.67    0.19
  18 -10 -12    1.32    0.19
  18 -10 -12    0.51    0.20
  18 -10 -12    0.61    0.18
 -18  10  13    7.26    0.90
 -18  10  13    5.62    0.91
  18 -10 -13    7.25    0.90
  18 -10 -13    7.23    0.90
  18 -10 -13    5.63    0.91
  18 -10 -13    7.47    0.91
 -18  10  14    2.53    0.29
 -18  10  14    1.45    0.27
  18 -10 -14    1.50    0.27
  18 -10 -14    1.09    0.27
  18 -10 -14    1.47    0.29
 -18  10  15    5.62    0.75
 -18  10  15    5.19    0.76
  18 -10 -15    5.65    0.75
  18 -10 -15    5.60    0.76
 -18  10  16    2.30    0.32
 -18  10  16    2.04    0.34
  18 -10 -16    1.82    0.32
  18 -10 -16    1.93    0.33
 -18  10  17    1.32    0.26
 -18  11   1    0.11    0.10
 -18  11   1    0.11    0.11
 -18  11   1    0.12    0.12
 -18  11   1    0.01    0.11
  18 -11  -1    0.10    0.12
  18 -11  -1    0.04    0.09
  18 -11  -1    0.32    0.15
  18 -11  -1   -0.04    0.12
 -18  11   2   15.56    2.01
 -18  11   2   16.64    2.02
 -18  11   2   13.82    2.02
 -18  11   2   14.58    2.01
  18 -11  -2   17.11    2.03
  18 -11  -2   15.87    2.01
  18 -11  -2   15.30    2.03
  18 -11  -2   16.13    2.03
 -18  11   3    0.31    0.11
 -18  11   3    0.12    0.14
 -18  11   3    0.02    0.11
  18 -11  -3    0.22    0.10
  18 -11  -3    0.22    0.15
  18 -11  -3    0.36    0.13
 -18  11   4   19.66    2.63
 -18  11   4   22.47    2.65
 -18  11   4   19.19    2.63
  18 -11  -4   20.43    2.64
  18 -11  -4   20.45    2.64
  18 -11  -4   21.15    2.66
 -18  11   5    3.06    0.44
 -18  11   5    3.23    0.45
 -18  11   5    3.08    0.47
 -18  11   5    3.08    0.44
  18 -11  -5    3.59    0.46
 -18  11   6   10.62    1.35
 -18  11   6   10.25    1.35
 -18  11   6   10.03    1.37
 -18  11   6   10.31    1.35
  18 -11  -6   10.70    1.36
  18 -11  -6   10.25    1.37
 -18  11   7   10.70    1.26
 -18  11   7    8.95    1.27
  18 -11  -7    9.27    1.25
  18 -11  -7    9.32    1.27
 -18  11   8    4.87    0.67
 -18  11   8    4.37    0.66
 -18  11   8    4.97    0.69
 -18  11   8    5.77    0.68
  18 -11  -8    5.18    0.67
  18 -11  -8    4.71    0.68
 -18  11   9    8.76    1.11
 -18  11   9    9.06    1.13
  18 -11  -9    8.02    1.11
  18 -11  -9    7.97    1.12
 -18  11  10    0.98    0.17
 -18  11  10    0.94    0.20
  18 -11 -10    0.32    0.16
  18 -11 -10    0.62    0.16
 -18  11  11    3.69    0.48
 -18  11  11    2.94    0.49
  18 -11 -11    3.44    0.48
  18 -11 -11    3.54    0.51
 -18  11  12   -0.28    0.15
 -18  11  12   -0.12    0.14
  18 -11 -12   -0.11    0.15
  18 -11 -12   -0.12    0.13
  18 -11 -12    0.10    0.13
  18 -11 -12   -0.12    0.14
 -18  11  13    1.69    0.29
 -18  11  13    2.60    0.34
  18 -11 -13    1.85    0.30
  18 -11 -13    1.58    0.30
  18 -11 -13    2.44    0.33
  18 -11 -13    1.65    0.32
 -18  11  14   -0.07    0.15
 -18  11  14    0.18    0.14
  18 -11 -14    0.17    0.15
  18 -11 -14   -0.12    0.14
 -18  11  15    0.46    0.15
 -18  11  15   -0.19    0.14
  18 -11 -15    0.09    0.15
  18 -11 -15   -0.06    0.14
 -18  11  16    0.10    0.14
 -18  11  16   -0.32    0.13
  18 -11 -16   -0.06    0.14
  18 -11 -16    0.15    0.16
 -18  12   1    0.59    0.14
 -18  12   1    0.72    0.17
 -18  12   1    0.74    0.17
 -18  12   1    0.69    0.15
  18 -12  -1    0.42    0.16
  18 -12  -1    0.73    0.14
  18 -12  -1    0.80    0.18
  18 -12  -1    0.72    0.18
 -18  12   2    8.15    1.03
 -18  12   2    7.48    1.02
  18 -12  -2    7.52    1.02
  18 -12  -2    8.27    1.05
 -18  12   3   -0.08    0.10
 -18  12   3    0.13    0.15
 -18  12   3    0.05    0.14
 -18  12   3    0.25    0.11
  18 -12  -3    0.00    0.15
  18 -12  -3   -0.07    0.09
  18 -12  -3    0.25    0.15
  18 -12  -3   -0.06    0.13
 -18  12   4    0.33    0.11
 -18  12   4    0.34    0.14
 -18  12   4    0.10    0.14
 -18  12   4    0.23    0.12
  18 -12  -4    0.27    0.13
 -18  12   5   -0.04    0.11
 -18  12   5    0.04    0.14
 -18  12   5   -0.25    0.12
 -18  12   5    0.14    0.10
  18 -12  -5    0.28    0.16
 -18  12   6    0.04    0.10
 -18  12   6    0.16    0.13
 -18  12   6   -0.28    0.13
 -18  12   6   -0.07    0.12
  18 -12  -6    0.03    0.15
  18 -12  -6    0.19    0.13
 -18  12   7    0.67    0.19
 -18  12   7    0.97    0.19
 -18  12   7    1.07    0.21
 -18  12   7    1.17    0.19
  18 -12  -7    1.15    0.21
  18 -12  -7    1.19    0.22
 -18  12   8    0.25    0.15
 -18  12   8    0.21    0.14
 -18  12   8   -0.14    0.11
  18 -12  -8    0.34    0.17
  18 -12  -8   -0.22    0.13
 -18  12   9    7.67    0.91
 -18  12   9    6.32    0.92
  18 -12  -9    6.61    0.91
  18 -12  -9    6.56    0.92
 -18  12  10    0.22    0.14
 -18  12  10    0.27    0.15
  18 -12 -10    0.48    0.15
  18 -12 -10   -0.06    0.14
 -18  12  11    7.04    0.86
 -18  12  11    5.96    0.87
  18 -12 -11    6.46    0.86
  18 -12 -11    6.10    0.87
 -18  12  12    0.93    0.21
 -18  12  12    0.74    0.19
  18 -12 -12    0.81    0.20
  18 -12 -12    0.94    0.19
  18 -12 -12    0.88    0.20
  18 -12 -12    0.21    0.21
 -18  12  13    7.95    1.02
 -18  12  13    7.01    1.03
  18 -12 -13    8.82    1.03
  18 -12 -13    7.10    1.03
 -18  12  14    0.16    0.14
  18 -12 -14   -0.04    0.17
  18 -12 -14    0.11    0.15
 -18  12  15    9.01    1.03
 -18  12  15    7.29    1.03
  18 -12 -15    6.61    1.02
 -18  13   1    1.55    0.20
 -18  13   1    0.96    0.23
 -18  13   1    1.19    0.21
  18 -13  -1    1.10    0.23
  18 -13  -1    1.20    0.21
  18 -13  -1    1.62    0.25
 -18  13   2   12.20    1.49
 -18  13   2   13.00    1.51
 -18  13   2   11.27    1.51
 -18  13   2   10.26    1.48
  18 -13  -2   12.32    1.50
  18 -13  -2   10.62    1.50
  18 -13  -2   10.79    1.50
 -18  13   3    1.24    0.20
 -18  13   3    0.89    0.22
 -18  13   3    0.87    0.22
 -18  13   3    1.01    0.19
  18 -13  -3    1.08    0.22
  18 -13  -3    1.24    0.22
 -18  13   4   17.59    2.26
  18 -13  -4   17.30    2.28
 -18  13   5    0.03    0.11
 -18  13   5   -0.24    0.13
 -18  13   5    0.02    0.13
 -18  13   5    0.13    0.11
  18 -13  -5    0.41    0.16
  18 -13  -5    0.19    0.14
 -18  13   6   14.17    1.93
 -18  13   6   16.37    1.95
 -18  13   6   14.02    1.95
 -18  13   6   14.81    1.94
  18 -13  -6   16.61    1.96
  18 -13  -6   14.10    1.95
 -18  13   7    1.37    0.26
 -18  13   7    2.08    0.29
 -18  13   7    1.82    0.29
 -18  13   7    1.89    0.27
  18 -13  -7    1.70    0.28
  18 -13  -7    1.56    0.29
 -18  13   8   13.34    1.67
 -18  13   8   11.72    1.67
 -18  13   8   12.11    1.66
  18 -13  -8   14.32    1.68
  18 -13  -8   12.85    1.69
 -18  13  10    3.38    0.55
 -18  13  10    4.47    0.57
  18 -13 -10    4.07    0.56
  18 -13 -10    4.09    0.56
 -18  13  11    2.98    0.40
 -18  13  11    3.06    0.41
  18 -13 -11    2.58    0.39
  18 -13 -11    2.16    0.38
  18 -13 -11    2.60    0.41
 -18  13  12    0.91    0.20
 -18  13  12    1.00    0.20
  18 -13 -12    0.16    0.19
  18 -13 -12    0.59    0.19
 -18  13  13    1.90    0.34
 -18  13  13    2.11    0.35
  18 -13 -13    1.84    0.34
  18 -13 -13    2.63    0.36
 -18  13  14    0.12    0.15
 -18  13  14    0.12    0.16
  18 -13 -14   -0.07    0.15
  18 -13 -14    0.52    0.17
 -18  14   1    3.65    0.46
 -18  14   1    2.84    0.47
 -18  14   1    3.05    0.48
 -18  14   1    3.20    0.46
  18 -14  -1    3.55    0.49
  18 -14  -1    3.70    0.49
 -18  14   2    1.15    0.25
 -18  14   2    1.37    0.25
 -18  14   2    1.63    0.24
  18 -14  -2    1.22    0.25
  18 -14  -2    1.85    0.28
 -18  14   3    1.99    0.29
 -18  14   3    1.54    0.31
 -18  14   3    2.04    0.32
  18 -14  -3    2.26    0.34
  18 -14  -3    2.11    0.33
 -18  14   4    0.20    0.11
 -18  14   4    0.37    0.15
  18 -14  -4   -0.01    0.18
  18 -14  -4    0.19    0.15
 -18  14   5    0.28    0.13
 -18  14   5    0.36    0.17
 -18  14   5    0.57    0.16
 -18  14   5    0.55    0.13
  18 -14  -5    0.45    0.20
  18 -14  -5    0.51    0.17
 -18  14   6   -0.23    0.10
 -18  14   6    0.10    0.16
 -18  14   6    0.01    0.12
 -18  14   6    0.22    0.11
  18 -14  -6   -0.01    0.18
  18 -14  -6    0.45    0.16
 -18  14   7    1.19    0.20
 -18  14   7    1.31    0.23
 -18  14   7    0.95    0.22
 -18  14   7    1.15    0.20
  18 -14  -7    1.03    0.25
  18 -14  -7    1.03    0.23
 -18  14   8    1.09    0.19
 -18  14   9    1.72    0.28
 -18  14   9    1.27    0.27
  18 -14  -9    1.71    0.27
  18 -14  -9    1.74    0.29
 -18  14  10    2.77    0.40
 -18  14  10    2.33    0.41
  18 -14 -10    2.59    0.40
  18 -14 -10    3.10    0.42
 -18  14  11    3.21    0.39
 -18  14  11    2.05    0.37
  18 -14 -11    2.54    0.37
  18 -14 -11    1.98    0.38
 -18  14  12    3.67    0.45
 -18  14  12    2.60    0.45
  18 -14 -12    2.50    0.43
  18 -14 -12    3.31    0.46
 -18  14  13    5.98    0.87
  18 -14 -13    6.86    0.88
 -18  15   1    4.83    0.62
 -18  15   1    5.47    0.64
 -18  15   1    3.71    0.63
  18 -15  -1    4.20    0.64
  18 -15  -1    4.92    0.66
 -18  15   2    8.07    1.14
 -18  15   2    8.45    1.13
  18 -15  -2   10.24    1.16
  18 -15  -2    8.02    1.15
 -18  15   3    4.63    0.60
 -18  15   3    4.94    0.62
 -18  15   3    3.99    0.63
 -18  15   3    4.08    0.61
  18 -15  -3    4.35    0.63
  18 -15  -3    5.13    0.64
 -18  15   4   11.43    1.48
 -18  15   4   11.83    1.50
 -18  15   4   11.34    1.51
 -18  15   4   11.15    1.49
  18 -15  -4   12.50    1.51
  18 -15  -4   10.49    1.51
 -18  15   5    1.88    0.27
 -18  15   5    1.38    0.29
 -18  15   5    2.02    0.31
 -18  15   5    1.77    0.27
  18 -15  -5    1.68    0.30
  18 -15  -5    1.96    0.32
 -18  15   6   10.82    1.38
 -18  15   6   10.67    1.40
 -18  15   6   10.29    1.38
  18 -15  -6   10.42    1.41
 -18  15   7   -0.33    0.16
 -18  15   7    0.22    0.13
 -18  15   7    0.08    0.10
  18 -15  -7    0.02    0.18
  18 -15  -7   -0.22    0.15
 -18  15   8   11.52    1.45
 -18  15   8   10.28    1.45
 -18  15   8   10.36    1.43
  18 -15  -8   12.08    1.46
  18 -15  -8   11.21    1.47
 -18  15   9    0.31    0.17
 -18  15   9    0.06    0.15
  18 -15  -9    0.72    0.18
  18 -15  -9    0.18    0.16
 -18  15  10    5.11    0.67
 -18  15  10    4.51    0.67
  18 -15 -10    4.90    0.67
  18 -15 -10    4.58    0.67
 -18  15  11    0.70    0.20
 -18  15  11    0.72    0.18
  18 -15 -11    0.68    0.23
  18 -15 -11    0.27    0.21
 -18  15  12    1.59    0.30
  18 -15 -12    1.70    0.31
 -18  16   1    2.14    0.32
 -18  16   1    2.42    0.36
 -18  16   1    2.01    0.34
 -18  16   1    2.25    0.33
  18 -16  -1    2.13    0.35
  18 -16  -1    2.66    0.38
 -18  16   2    0.34    0.14
 -18  16   2   -0.01    0.10
  18 -16  -2   -0.35    0.18
  18 -16  -2   -0.02    0.16
 -18  16   3    0.62    0.14
 -18  16   3    0.60    0.19
 -18  16   3    0.60    0.17
 -18  16   3    0.51    0.13
  18 -16  -3    1.01    0.20
  18 -16  -3    0.39    0.19
 -18  16   4    0.19    0.12
 -18  16   4    0.23    0.15
 -18  16   4    0.48    0.13
  18 -16  -4    0.86    0.20
 -18  16   5    0.22    0.11
 -18  16   5   -0.01    0.16
 -18  16   5    0.32    0.11
  18 -16  -5    0.04    0.16
 -18  16   6    0.01    0.11
 -18  16   6    0.41    0.16
 -18  16   6    0.17    0.16
 -18  16   6    0.04    0.10
  18 -16  -6    0.24    0.16
  18 -16  -6    0.21    0.16
 -18  16   7    0.85    0.20
 -18  16   7    0.52    0.16
  18 -16  -7    0.28    0.20
  18 -16  -7    0.52    0.20
 -18  16   8    0.95    0.22
 -18  16   8    0.56    0.19
  18 -16  -8    0.46    0.19
  18 -16  -8    0.97    0.22
 -18  16   9    0.14    0.19
 -18  16   9    0.35    0.17
  18 -16  -9   -0.04    0.20
  18 -16  -9    0.02    0.16
 -18  16  10    6.21    0.69
 -18  16  10    4.26    0.67
  18 -16 -10    4.89    0.67
  18 -16 -10    4.00    0.66
 -18  17   1    7.66    0.93
 -18  17   1    6.62    0.96
 -18  17   1    6.53    0.95
 -18  17   1    6.89    0.94
  18 -17  -1    7.40    0.96
  18 -17  -1    7.17    0.97
 -18  17   2    2.38    0.35
 -18  17   2    2.53    0.39
 -18  17   2    2.27    0.36
  18 -17  -2    3.11    0.41
 -18  17   3    8.41    1.11
 -18  17   4    3.69    0.51
 -18  17   4    3.65    0.54
 -18  17   4    3.93    0.54
 -18  17   4    3.48    0.51
  18 -17  -4    3.97    0.55
  18 -17  -4    3.72    0.55
 -18  17   5    3.46    0.53
 -18  17   5    3.40    0.54
 -18  17   5    3.65    0.51
  18 -17  -5    4.53    0.55
  18 -17  -5    3.57    0.54
 -18  17   6    5.96    0.74
 -18  17   6    4.89    0.73
  18 -17  -6    4.87    0.72
 -18  17   7    0.80    0.23
 -18  17   7    1.11    0.23
  18 -17  -7    1.06    0.23
  18 -17  -7    1.05    0.25
 -18  17   8    5.81    0.74
 -18  17   8    4.90    0.73
  18 -17  -8    5.37    0.73
  18 -17  -8    4.90    0.73
 -18  17   9    0.29    0.21
  18 -17  -9    0.21    0.23
 -18  18   1    0.79    0.17
 -18  18   1    0.40    0.23
 -18  18   1    1.17    0.18
  18 -18  -1    0.73    0.23
 -18  18   2    0.50    0.15
 -18  18   2    0.63    0.21
 -18  18   2    0.62    0.18
 -18  18   2    0.59    0.14
  18 -18  -2    0.88    0.24
  18 -18  -2    0.62    0.20
 -18  18   3   -0.06    0.17
 -18  18   3    0.27    0.16
 -18  18   3    0.15    0.11
  18 -18  -3    0.30    0.18
 -18  18   4   -0.12    0.19
 -18  18   4   -0.13    0.16
  18 -18  -4    0.47    0.18
  18 -18  -4   -0.37    0.16
 -18  18   5    0.14    0.19
  18 -18  -5    0.15    0.18
  18 -18  -5   -0.03    0.15
 -18  18   6    0.03    0.21
 -18  18   6   -0.05    0.16
  18 -18  -6    0.04    0.20
  18 -18  -6    0.23    0.18
 -18  18   7   -0.07    0.21
 -18  18   7   -0.22    0.15
  18 -18  -7   -0.11    0.20
  18 -18  -7    0.53    0.19
 -18  19   1    4.83    0.69
 -18  19   1    4.83    0.65
  18 -19  -1    6.14    0.71
  18 -19  -1    4.00    0.68
 -18  19   2    0.11    0.18
 -18  19   2    0.12    0.14
  18 -19  -2    0.11    0.18
  18 -19  -2    0.00    0.17
 -18  19   3    7.94    1.02
 -18  19   3    6.91    1.00
  18 -19  -3    6.90    1.01
  18 -19  -3    8.16    1.02
 -18  19   4    0.59    0.23
 -18  19   4   -0.10    0.15
  18 -19  -4    0.91    0.25
  18 -19  -4    0.34    0.19
 -18  19   5    2.53    0.52
 -18  19   5    4.38    0.51
  18 -19  -5    2.54    0.52
  18 -19  -5    3.73    0.51
 -18  20   1    0.87    0.28
 -18  20   1    1.48    0.28
  18 -20  -1    1.40    0.31
  18 -20  -1    2.00    0.30
 -18  20   2    0.19    0.20
 -18  20   2    0.18    0.15
  18 -20  -2    0.64    0.23
  18 -20  -2    0.30    0.18
 -18  20   3    0.48    0.17
  18 -20  -3    0.58    0.20
 -18  21   1    1.82    0.33
  18 -21  -1    2.15    0.35
 -17 -17   1   -0.30    0.13
  17  17  -1    0.01    0.16
 -17 -17   2    0.15    0.15
  17  17  -2   -0.12    0.15
 -17 -17   3    0.36    0.16
  17  17  -3   -0.06    0.13
 -17 -17   4    0.16    0.15
  17  17  -4    0.60    0.17
 -17 -16   1    0.49    0.16
  17  16  -1    0.13    0.13
 -17 -16   2    2.44    0.40
  17  16  -2    3.01    0.40
 -17 -16   3    0.20    0.13
  17  16  -3    0.10    0.12
 -17 -16   4    2.76    0.40
  17  16  -4    2.55    0.39
 -17 -16   5    0.50    0.18
  17  16  -5    0.79    0.18
 -17 -16   6    1.34    0.23
  17  16  -6    1.04    0.23
 -17 -16   7    0.63    0.18
  17  16  -7    0.69    0.18
  17  16  -8    0.34    0.14
 -17 -15   1    0.49    0.19
 -17 -15   2    0.14    0.17
 -17 -15   2    0.04    0.15
 -17 -15   3   -0.19    0.16
 -17 -15   3   -0.12    0.14
  17  15  -3   -0.12    0.12
 -17 -15   4    0.97    0.25
 -17 -15   4    0.94    0.22
  17  15  -4    1.52    0.23
 -17 -15   5   -0.11    0.12
  17  15  -5    0.33    0.13
 -17 -15   6    1.35    0.25
  17  15  -6    1.66    0.25
 -17 -15   7    0.93    0.21
  17  15  -7    1.22    0.20
 -17 -15   8    1.40    0.26
  17  15  -8    1.62    0.26
 -17 -15   9    1.54    0.27
  17  15  -9    1.65    0.26
 -17 -15  10    1.45    0.25
  17  15 -10    1.35    0.24
 -17 -14   1    1.42    0.27
  17  14  -1    1.43    0.24
  17  14  -1    1.35    0.23
 -17 -14   2    2.99    0.45
 -17 -14   2    3.62    0.44
 -17 -14   2    2.86    0.46
  17  14  -2    2.63    0.42
 -17 -14   3    0.34    0.16
 -17 -14   3   -0.04    0.13
 -17 -14   3    0.24    0.18
  17  14  -3   -0.20    0.12
  17  14  -3    0.09    0.10
 -17 -14   4    3.10    0.45
 -17 -14   4    2.99    0.42
 -17 -14   4    3.01    0.45
  17  14  -4    3.67    0.44
  17  14  -4    2.39    0.42
 -17 -14   5    0.33    0.17
 -17 -14   5    0.03    0.14
  17  14  -5    0.20    0.09
 -17 -14   6    1.16    0.25
 -17 -14   6    1.45    0.22
 -17 -14   6    1.23    0.26
  17  14  -6    1.39    0.22
  17  14  -6    1.11    0.22
 -17 -14   7    0.38    0.18
 -17 -14   7    0.50    0.15
 -17 -14   7    0.30    0.18
  17  14  -7    0.39    0.13
  17  14  -7    0.39    0.12
 -17 -14   8    0.47    0.15
 -17 -14   8    0.19    0.18
  17  14  -8    0.30    0.14
  17  14  -8    0.32    0.13
 -17 -14   9    0.53    0.14
 -17 -14   9    0.42    0.19
  17  14  -9    0.44    0.14
  17  14  -9    0.27    0.13
 -17 -14  10    0.11    0.14
 -17 -14  10   -0.16    0.18
  17  14 -10    0.33    0.13
  17  14 -10    0.14    0.12
 -17 -14  11    0.04    0.18
  17  14 -11    0.09    0.12
  17  14 -11    0.26    0.12
 -17 -14  12    0.31    0.13
 -17 -14  12   -0.06    0.17
  17  14 -12    0.24    0.13
  17  14 -12    0.22    0.11
 -17 -13   1    0.16    0.18
 -17 -13   1    0.00    0.13
 -17 -13   1    0.50    0.18
  17  13  -1    0.20    0.13
  17  13  -1    0.85    0.14
 -17 -13   2    0.17    0.16
 -17 -13   2    0.32    0.13
 -17 -13   2    0.55    0.17
  17  13  -2    0.24    0.13
  17  13  -2    0.14    0.10
 -17 -13   3    0.68    0.19
 -17 -13   3    0.79    0.17
 -17 -13   3    1.14    0.21
  17  13  -3    0.58    0.15
  17  13  -3    0.68    0.16
 -17 -13   4    1.41    0.26
 -17 -13   4    1.56    0.23
 -17 -13   4    1.74    0.27
  17  13  -4    1.11    0.23
  17  13  -4    1.22    0.22
 -17 -13   5    0.22    0.17
 -17 -13   5    0.28    0.11
 -17 -13   5   -0.15    0.16
  17  13  -5   -0.10    0.10
  17  13  -5    0.21    0.10
 -17 -13   6    3.92    0.51
 -17 -13   6    3.26    0.48
 -17 -13   6    3.19    0.51
  17  13  -6    3.45    0.48
  17  13  -6    3.86    0.49
 -17 -13   7    0.09    0.15
 -17 -13   7    0.06    0.18
  17  13  -7    0.03    0.11
  17  13  -7   -0.03    0.09
 -17 -13   8    5.24    0.74
 -17 -13   8    4.50    0.72
 -17 -13   8    5.89    0.75
  17  13  -8    6.06    0.72
 -17 -13   9    1.29    0.25
 -17 -13   9    1.00    0.20
 -17 -13   9    1.57    0.27
  17  13  -9    1.18    0.21
  17  13  -9    1.24    0.21
 -17 -13  10    3.19    0.41
 -17 -13  10    3.03    0.43
  17  13 -10    2.62    0.39
  17  13 -10    2.51    0.39
 -17 -13  11    4.35    0.53
 -17 -13  11    3.50    0.55
  17  13 -11    4.05    0.53
  17  13 -11    3.35    0.51
 -17 -13  12    1.22    0.21
 -17 -13  12    1.27    0.24
  17  13 -12    0.64    0.19
  17  13 -12    0.97    0.18
 -17 -13  13    4.67    0.60
 -17 -13  13    4.89    0.65
  17  13 -13    3.86    0.59
  17  13 -13    4.27    0.58
 -17 -13  14    0.10    0.14
 -17 -13  14   -0.14    0.16
  17  13 -14    0.06    0.13
 -17 -13  15    2.73    0.46
  17  13 -15    3.19    0.43
 -17 -12   1    3.41    0.49
 -17 -12   1    3.71    0.47
 -17 -12   1    2.73    0.49
  17  12  -1    3.41    0.46
 -17 -12   2    2.73    0.45
 -17 -12   2    2.97    0.43
 -17 -12   2    2.92    0.47
  17  12  -2    3.42    0.43
 -17 -12   3    0.74    0.17
 -17 -12   3    1.15    0.25
  17  12  -3    0.79    0.18
 -17 -12   4    5.42    0.66
 -17 -12   4    4.95    0.64
 -17 -12   4    3.27    0.66
  17  12  -4    5.01    0.64
 -17 -12   5    0.03    0.14
 -17 -12   5    0.04    0.12
 -17 -12   5    0.24    0.19
  17  12  -5    0.12    0.11
 -17 -12   6    3.28    0.44
 -17 -12   6    3.08    0.41
 -17 -12   6    2.69    0.44
 -17 -12   6    2.05    0.44
  17  12  -6    3.13    0.41
 -17 -12   7    0.51    0.18
 -17 -12   7    0.50    0.15
 -17 -12   7    0.95    0.20
  17  12  -7    0.66    0.15
  17  12  -7    0.61    0.15
 -17 -12   8    1.14    0.23
 -17 -12   8    1.43    0.22
 -17 -12   8    1.01    0.23
  17  12  -8    1.46    0.22
  17  12  -8    1.24    0.21
 -17 -12   9    0.52    0.18
 -17 -12   9    0.77    0.16
 -17 -12   9    0.22    0.17
  17  12  -9    0.32    0.15
  17  12  -9    0.64    0.13
 -17 -12  10    0.31    0.16
  17  12 -10    0.41    0.12
 -17 -12  11   -0.05    0.15
 -17 -12  11    0.30    0.12
 -17 -12  11    0.21    0.16
  17  12 -11    0.10    0.12
  17  12 -11    0.54    0.12
  17  12 -11    0.64    0.25
 -17 -12  12    0.84    0.18
 -17 -12  12    1.25    0.23
  17  12 -12    0.74    0.18
  17  12 -12    0.89    0.16
 -17 -12  13   -0.10    0.12
  17  12 -13    0.20    0.12
  17  12 -13    0.06    0.10
 -17 -12  14    1.40    0.22
 -17 -12  14    1.30    0.26
  17  12 -14    1.27    0.21
  17  12 -14    1.05    0.20
 -17 -12  15    1.28    0.22
 -17 -12  15    1.08    0.25
  17  12 -15    1.19    0.20
  17  12 -15    0.77    0.18
 -17 -12  16    0.15    0.18
  17  12 -16    0.12    0.11
 -17 -12  17    2.26    0.36
  17  12 -17    1.86    0.30
 -17 -11   1    0.11    0.15
 -17 -11   1   -0.18    0.16
 -17 -11   1   -0.16    0.16
  17  11  -1    0.41    0.18
  17  11  -1    0.00    0.09
 -17 -11   2    0.10    0.15
 -17 -11   2    0.23    0.13
 -17 -11   2    0.10    0.18
 -17 -11   2    0.09    0.17
  17  11  -2    0.18    0.12
  17  11  -2    0.30    0.18
  17  11  -2    0.32    0.10
 -17 -11   3    0.33    0.17
 -17 -11   3    0.72    0.16
 -17 -11   3    0.81    0.22
 -17 -11   3    0.83    0.21
  17  11  -3    0.59    0.14
  17  11  -3    0.73    0.14
 -17 -11   4    0.15    0.15
 -17 -11   4    0.51    0.14
 -17 -11   4    0.54    0.20
 -17 -11   4    0.78    0.18
  17  11  -4    0.17    0.13
  17  11  -4    0.17    0.12
 -17 -11   5    0.97    0.16
 -17 -11   5    0.81    0.22
 -17 -11   5    0.94    0.22
  17  11  -5    0.73    0.16
  17  11  -5    0.72    0.15
 -17 -11   6    3.47    0.52
 -17 -11   6    3.53    0.50
 -17 -11   6    4.04    0.54
 -17 -11   6    4.07    0.54
  17  11  -6    3.69    0.50
  17  11  -6    3.51    0.50
 -17 -11   7    0.65    0.16
 -17 -11   7    0.67    0.15
 -17 -11   7    0.42    0.18
  17  11  -7    0.48    0.14
  17  11  -7    0.38    0.12
 -17 -11   8    6.52    0.89
 -17 -11   8    6.49    0.87
 -17 -11   8    7.92    0.91
  17  11  -8    6.91    0.88
  17  11  -8    5.91    0.87
 -17 -11   9   -0.16    0.13
 -17 -11   9   -0.08    0.11
 -17 -11   9    0.10    0.15
  17  11  -9   -0.07    0.11
  17  11  -9    0.01    0.09
 -17 -11  10    7.30    0.98
 -17 -11  10    7.72    0.97
  17  11 -10    6.99    0.96
 -17 -11  11    2.52    0.35
 -17 -11  11    1.75    0.37
  17  11 -11    2.33    0.33
  17  11 -11    1.95    0.43
 -17 -11  12    3.42    0.49
 -17 -11  12    3.49    0.47
 -17 -11  12    3.80    0.52
  17  11 -12    3.23    0.47
  17  11 -12    3.34    0.47
  17  11 -12    3.28    0.56
 -17 -11  13    3.69    0.53
 -17 -11  13    3.74    0.51
 -17 -11  13    3.94    0.55
  17  11 -13    3.79    0.51
  17  11 -13    3.61    0.50
  17  11 -13    3.08    0.58
 -17 -11  14   -0.08    0.12
 -17 -11  14    0.22    0.17
  17  11 -14    0.31    0.12
  17  11 -14    0.37    0.10
 -17 -11  15    5.76    0.75
 -17 -11  15    6.78    0.80
  17  11 -15    5.20    0.74
  17  11 -15    5.37    0.75
 -17 -11  16   -0.04    0.14
 -17 -11  16   -0.25    0.17
  17  11 -16   -0.17    0.12
  17  11 -16    0.04    0.10
 -17 -11  17    3.25    0.51
  17  11 -17    3.43    0.47
 -17 -11  18    0.64    0.19
  17  11 -18    0.43    0.13
 -17 -10   1    8.98    1.04
 -17 -10   1    7.82    1.02
 -17 -10   1    7.50    1.05
 -17 -10   1    7.96    1.04
  17  10  -1    7.80    1.02
  17  10  -1    7.89    1.04
  17  10  -1    6.99    1.01
 -17 -10   2    1.05    0.21
 -17 -10   2    1.42    0.20
 -17 -10   2    0.89    0.25
 -17 -10   2    0.99    0.24
  17  10  -2    1.25    0.19
  17  10  -2    1.32    0.25
  17  10  -2    0.97    0.20
 -17 -10   3    4.00    0.64
 -17 -10   3    5.07    0.68
 -17 -10   3    4.83    0.67
  17  10  -3    4.46    0.64
  17  10  -3    4.62    0.66
  17  10  -3    5.97    0.65
 -17 -10   4    3.75    0.48
 -17 -10   4    2.88    0.46
 -17 -10   4    3.49    0.50
 -17 -10   4    3.95    0.51
  17  10  -4    3.27    0.50
  17  10  -4    3.25    0.46
 -17 -10   5    3.39    0.46
 -17 -10   5    3.53    0.44
 -17 -10   5    3.37    0.48
 -17 -10   5    3.31    0.47
  17  10  -5    3.11    0.43
  17  10  -5    2.50    0.43
 -17 -10   6    7.48    0.94
 -17 -10   6    6.99    0.93
 -17 -10   6    6.50    0.95
 -17 -10   6    6.81    0.95
  17  10  -6    7.56    0.93
  17  10  -6    6.89    0.93
 -17 -10   7    0.18    0.10
 -17 -10   7    0.22    0.15
  17  10  -7    0.11    0.10
  17  10  -7    0.05    0.09
 -17 -10   8    5.35    0.76
 -17 -10   8    5.54    0.75
 -17 -10   8    6.05    0.78
  17  10  -8    6.02    0.75
  17  10  -8    5.35    0.75
 -17 -10   9    0.66    0.19
  17  10  -9    0.94    0.16
  17  10  -9    0.49    0.14
 -17 -10  10    0.54    0.17
 -17 -10  10    0.81    0.16
 -17 -10  10    0.37    0.18
  17  10 -10    0.88    0.16
  17  10 -10    0.80    0.15
 -17 -10  11    0.51    0.18
 -17 -10  11    0.81    0.16
 -17 -10  11    0.50    0.18
  17  10 -11    0.63    0.14
  17  10 -11    0.34    0.13
  17  10 -11    0.42    0.28
 -17 -10  12    0.48    0.16
 -17 -10  12    0.64    0.16
 -17 -10  12    1.09    0.22
  17  10 -12    0.56    0.14
  17  10 -12    0.36    0.13
  17  10 -12    0.91    0.32
 -17 -10  13    0.19    0.14
 -17 -10  13    0.19    0.13
  17  10 -13    0.01    0.12
  17  10 -13   -0.34    0.21
 -17 -10  14    0.69    0.17
 -17 -10  14    1.05    0.21
  17  10 -14    0.72    0.16
  17  10 -14    0.74    0.15
  17  10 -14    0.35    0.27
 -17 -10  15    0.52    0.15
 -17 -10  15    0.97    0.20
  17  10 -15    0.40    0.15
  17  10 -15    0.55    0.13
  17  10 -15   -0.02    0.25
 -17 -10  16   -0.04    0.14
 -17 -10  16    0.10    0.15
  17  10 -16    0.01    0.11
  17  10 -16    0.02    0.09
 -17 -10  17    2.74    0.39
 -17 -10  17    3.00    0.43
  17  10 -17    2.47    0.38
  17  10 -17    2.65    0.38
 -17 -10  18    0.39    0.16
  17  10 -18    0.37    0.12
 -17 -10  19    2.90    0.39
  17  10 -19    2.14    0.35
 -17 -10  20   -0.03    0.14
 -17  -9   1    0.48    0.14
 -17  -9   1    0.35    0.12
 -17  -9   1    0.11    0.20
 -17  -9   1    0.09    0.17
  17   9  -1    0.17    0.10
  17   9  -1    0.53    0.19
  17   9  -1    0.15    0.11
 -17  -9   2    0.26    0.12
 -17  -9   2    0.28    0.12
  17   9  -2    0.35    0.11
  17   9  -2    0.60    0.17
  17   9  -2    0.25    0.11
 -17  -9   3    0.29    0.14
 -17  -9   3    0.30    0.11
 -17  -9   3    0.54    0.17
  17   9  -3    0.19    0.10
  17   9  -3    0.73    0.18
  17   9  -3    0.35    0.11
 -17  -9   4    0.30    0.13
 -17  -9   4    0.14    0.12
 -17  -9   4    0.21    0.14
  17   9  -4    0.39    0.11
  17   9  -4    0.49    0.17
  17   9  -4    0.15    0.10
 -17  -9   5    1.42    0.28
 -17  -9   5    2.20    0.31
  17   9  -5    1.69    0.30
  17   9  -5    1.73    0.26
 -17  -9   6    1.62    0.30
 -17  -9   6    2.02    0.29
 -17  -9   6    1.87    0.36
 -17  -9   6    2.56    0.34
  17   9  -6    1.92    0.29
  17   9  -6    2.52    0.34
  17   9  -6    1.72    0.29
 -17  -9   7    3.20    0.47
 -17  -9   7    3.16    0.45
 -17  -9   7    3.51    0.49
  17   9  -7    3.28    0.45
  17   9  -7    3.40    0.46
 -17  -9   8    7.10    0.95
 -17  -9   8    7.75    0.94
 -17  -9   8    6.82    0.96
  17   9  -8    7.48    0.94
  17   9  -8    6.56    0.94
 -17  -9   9    0.15    0.11
 -17  -9   9    0.40    0.17
  17   9  -9    0.27    0.11
  17   9  -9    0.28    0.10
 -17  -9  10   11.74    1.54
 -17  -9  10   12.62    1.54
 -17  -9  10   11.27    1.56
  17   9 -10   11.51    1.53
 -17  -9  11    1.42    0.25
 -17  -9  11    1.38    0.24
 -17  -9  11    1.45    0.28
  17   9 -11    1.76    0.24
  17   9 -11    1.20    0.23
  17   9 -11    1.56    0.35
 -17  -9  12    7.86    1.15
 -17  -9  12    9.61    1.15
 -17  -9  12    9.14    1.18
  17   9 -12    8.93    1.14
  17   9 -12    8.54    1.14
  17   9 -12    8.14    1.21
 -17  -9  13    2.65    0.38
 -17  -9  13    2.63    0.35
 -17  -9  13    2.28    0.39
  17   9 -13    2.20    0.34
  17   9 -13    2.18    0.34
  17   9 -13    2.84    0.44
 -17  -9  14    4.43    0.62
  17   9 -14    4.32    0.58
  17   9 -14    3.95    0.65
 -17  -9  15    6.91    0.92
  17   9 -15    7.08    0.92
  17   9 -15    6.78    0.99
 -17  -9  16    1.36    0.28
 -17  -9  16    2.59    0.34
  17   9 -16    1.79    0.27
  17   9 -16    1.89    0.27
  17   9 -16    1.71    0.36
 -17  -9  17    5.52    0.77
 -17  -9  17    6.13    0.80
  17   9 -17    5.78    0.76
 -17  -9  18    0.01    0.14
 -17  -9  18   -0.19    0.15
  17   9 -18   -0.02    0.12
  17   9 -18    0.06    0.10
 -17  -9  19    2.02    0.34
  17   9 -19    2.05    0.30
 -17  -9  20   -0.04    0.13
  17   9 -20   -0.03    0.09
 -17  -9  21    0.64    0.20
 -17  -8   1    9.76    1.16
 -17  -8   1    8.22    1.13
 -17  -8   1    8.36    1.16
 -17  -8   1    8.85    1.16
  17   8  -1    8.87    1.14
  17   8  -1    8.59    1.16
  17   8  -1    8.55    1.14
  17   8  -1    8.98    1.20
 -17  -8   2    0.01    0.10
 -17  -8   2    0.23    0.11
  17   8  -2    0.11    0.11
  17   8  -2    0.07    0.16
  17   8  -2    0.48    0.10
  17   8  -2    0.42    0.27
 -17  -8   3   11.21    1.45
 -17  -8   3   10.80    1.44
 -17  -8   3   10.90    1.47
 -17  -8   3   10.36    1.46
  17   8  -3   11.87    1.45
  17   8  -3   11.75    1.47
  17   8  -3   11.00    1.45
 -17  -8   4    2.46    0.31
 -17  -8   4    1.75    0.28
 -17  -8   4    1.69    0.33
 -17  -8   4    2.09    0.32
  17   8  -4    2.03    0.28
  17   8  -4    2.16    0.32
  17   8  -4    1.64    0.28
 -17  -8   5   11.50    1.51
 -17  -8   5   11.23    1.50
 -17  -8   5   11.20    1.52
 -17  -8   5   10.96    1.52
  17   8  -5   11.88    1.50
  17   8  -5   12.45    1.52
  17   8  -5   11.70    1.50
 -17  -8   6    5.94    0.78
 -17  -8   6    5.74    0.77
 -17  -8   6    5.54    0.80
 -17  -8   6    4.79    0.80
  17   8  -6    6.56    0.78
  17   8  -6    6.06    0.80
  17   8  -6    6.09    0.78
 -17  -8   7    1.59    0.26
 -17  -8   7    1.16    0.30
 -17  -8   7    1.48    0.28
  17   8  -7    1.47    0.27
  17   8  -7    1.90    0.25
 -17  -8   8    4.74    0.71
 -17  -8   8    5.33    0.72
  17   8  -8    5.37    0.69
  17   8  -8    5.28    0.69
 -17  -8   9    0.18    0.12
 -17  -8   9    0.04    0.12
 -17  -8   9    0.26    0.15
  17   8  -9   -0.08    0.10
  17   8  -9    0.01    0.10
 -17  -8  10    1.28    0.21
 -17  -8  10    1.19    0.26
  17   8 -10    1.32    0.21
  17   8 -10    1.15    0.21
 -17  -8  11    0.24    0.13
 -17  -8  11    0.14    0.11
 -17  -8  11    0.01    0.15
  17   8 -11   -0.01    0.10
  17   8 -11    0.27    0.10
  17   8 -11   -0.56    0.23
 -17  -8  12    0.28    0.14
 -17  -8  12    0.35    0.13
 -17  -8  12    0.43    0.17
  17   8 -12    0.47    0.13
  17   8 -12    0.12    0.11
  17   8 -12    0.36    0.24
 -17  -8  13    0.08    0.13
 -17  -8  13    0.02    0.10
 -17  -8  13    0.08    0.15
  17   8 -13    0.09    0.10
  17   8 -13   -0.07    0.09
  17   8 -13    0.29    0.24
 -17  -8  14    0.17    0.12
 -17  -8  14    0.17    0.16
  17   8 -14    0.18    0.11
  17   8 -14    0.12    0.10
  17   8 -14    0.55    0.29
 -17  -8  15    0.32    0.18
  17   8 -15    0.12    0.10
  17   8 -15   -0.32    0.26
 -17  -8  16    0.61    0.17
  17   8 -16    0.65    0.16
  17   8 -16    0.95    0.28
 -17  -8  17    1.42    0.22
 -17  -8  17    0.92    0.24
  17   8 -17    1.31    0.21
  17   8 -17    1.08    0.20
  17   8 -17    0.95    0.30
 -17  -8  18    2.05    0.30
 -17  -8  18    1.83    0.32
  17   8 -18    1.78    0.28
  17   8 -18    1.85    0.28
  17   8 -18    1.62    0.36
 -17  -8  19    3.50    0.47
 -17  -8  19    3.04    0.49
  17   8 -19    3.10    0.45
  17   8 -19    3.39    0.46
 -17  -8  20   -0.07    0.15
  17   8 -20    0.13    0.10
 -17  -8  21    4.90    0.68
  17   8 -21    4.72    0.66
 -17  -7   1    0.05    0.10
 -17  -7   1   -0.07    0.19
 -17  -7   1   -0.09    0.13
  17   7  -1    0.03    0.10
  17   7  -1   -0.11    0.11
  17   7  -1    0.10    0.25
 -17  -7   2   -0.04    0.12
 -17  -7   2   -0.22    0.09
  17   7  -2   -0.13    0.08
  17   7  -2   -0.10    0.15
  17   7  -2    0.06    0.10
  17   7  -2   -0.20    0.28
 -17  -7   3    0.64    0.15
 -17  -7   3    0.34    0.12
 -17  -7   3    0.40    0.19
  17   7  -3    0.63    0.13
  17   7  -3    0.72    0.18
  17   7  -3   -0.43    0.27
 -17  -7   4    0.65    0.17
 -17  -7   4    0.82    0.16
 -17  -7   4    0.53    0.21
  17   7  -4    0.70    0.14
  17   7  -4    1.21    0.21
  17   7  -4    0.59    0.29
 -17  -7   5    2.72    0.47
 -17  -7   5    3.61    0.46
 -17  -7   5    2.94    0.48
  17   7  -5    3.51    0.46
  17   7  -5    4.61    0.50
  17   7  -5    2.67    0.54
 -17  -7   6    3.02    0.39
 -17  -7   6    2.71    0.37
 -17  -7   6    2.36    0.39
 -17  -7   6    2.57    0.41
  17   7  -6    2.76    0.37
  17   7  -6    3.48    0.41
  17   7  -6    2.13    0.37
  17   7  -6    2.25    0.47
 -17  -7   7    5.98    0.86
 -17  -7   7    6.07    0.85
 -17  -7   7    6.92    0.88
 -17  -7   7    6.52    0.89
  17   7  -7    6.41    0.85
  17   7  -7    7.11    0.88
  17   7  -7    6.95    0.86
 -17  -7   8    7.89    1.07
 -17  -7   8    8.19    1.09
  17   7  -8    8.98    1.09
  17   7  -8    7.67    1.06
 -17  -7   9    1.17    0.23
 -17  -7   9    1.46    0.21
 -17  -7   9    1.29    0.25
  17   7  -9    1.14    0.20
  17   7  -9    0.76    0.26
  17   7  -9    1.41    0.21
 -17  -7  10   15.69    2.10
 -17  -7  10   16.69    2.09
 -17  -7  10   14.47    2.10
  17   7 -10   17.83    2.10
  17   7 -10   16.06    2.09
 -17  -7  11    0.51    0.16
 -17  -7  11    1.09    0.22
  17   7 -11    0.85    0.16
  17   7 -11    0.99    0.16
 -17  -7  12   14.86    1.88
 -17  -7  12   13.94    1.86
 -17  -7  12   13.49    1.89
  17   7 -12   15.94    1.87
  17   7 -12   13.69    1.86
  17   7 -12   14.81    1.95
 -17  -7  13   -0.10    0.12
 -17  -7  13    0.03    0.14
  17   7 -13   -0.13    0.09
  17   7 -13    0.06    0.10
  17   7 -13   -0.08    0.27
 -17  -7  14   11.88    1.44
 -17  -7  14    8.82    1.45
  17   7 -14   11.56    1.44
  17   7 -14   10.95    1.44
  17   7 -14   13.24    1.55
 -17  -7  15    3.56    0.49
 -17  -7  15    3.99    0.53
  17   7 -15    3.37    0.48
 -17  -7  16    5.90    0.76
 -17  -7  16    5.80    0.79
  17   7 -16    4.95    0.74
  17   7 -16    5.85    0.76
  17   7 -16    7.04    0.87
 -17  -7  17    3.44    0.53
  17   7 -17    3.96    0.52
  17   7 -17    4.27    0.57
  17   7 -17    3.66    0.61
 -17  -7  18    0.56    0.19
 -17  -7  18    0.73    0.21
  17   7 -18    1.22    0.18
  17   7 -18    1.14    0.18
  17   7 -18    0.65    0.27
 -17  -7  19    1.80    0.32
  17   7 -19    1.91    0.28
  17   7 -19    1.82    0.28
 -17  -7  20   -0.26    0.13
 -17  -7  20   -0.02    0.16
  17   7 -20    0.24    0.11
 -17  -7  21   -0.08    0.17
  17   7 -21    0.34    0.13
 -17  -7  22    0.27    0.16
  17   7 -22   -0.10    0.12
 -17  -6   1   10.21    1.44
 -17  -6   1   11.59    1.45
 -17  -6   1   11.60    1.47
 -17  -6   1   10.55    1.46
  17   6  -1   11.29    1.44
  17   6  -1   10.70    1.46
  17   6  -1   11.18    1.45
  17   6  -1   13.24    1.54
 -17  -6   2    2.24    0.35
 -17  -6   2    2.80    0.39
 -17  -6   2    2.05    0.38
  17   6  -2    2.59    0.34
  17   6  -2    2.47    0.35
  17   6  -2    3.60    0.49
 -17  -6   3   20.39    2.70
 -17  -6   3   21.21    2.69
 -17  -6   3   19.74    2.70
 -17  -6   3   20.17    2.71
  17   6  -3   21.35    2.69
  17   6  -3   21.41    2.71
  17   6  -3   20.98    2.70
  17   6  -3   23.21    2.78
 -17  -6   4    0.80    0.16
 -17  -6   4    0.77    0.16
 -17  -6   4    0.56    0.19
 -17  -6   4    0.28    0.18
  17   6  -4    0.81    0.15
  17   6  -4    0.97    0.20
  17   6  -4    0.76    0.15
  17   6  -4    1.41    0.31
 -17  -6   5   20.80    2.60
 -17  -6   5   20.59    2.59
 -17  -6   5   19.37    2.59
 -17  -6   5   18.67    2.60
  17   6  -5   19.26    2.58
  17   6  -5   22.24    2.62
  17   6  -5   20.05    2.59
  17   6  -5   20.99    2.66
 -17  -6   6    2.36    0.31
 -17  -6   6    1.58    0.28
 -17  -6   6    1.85    0.32
 -17  -6   6    1.44    0.32
  17   6  -6    2.08    0.27
  17   6  -6    1.83    0.32
  17   6  -6    1.88    0.28
  17   6  -6    2.63    0.42
 -17  -6   7    3.36    0.48
 -17  -6   7    3.21    0.46
 -17  -6   7    4.30    0.50
  17   6  -7    3.09    0.46
  17   6  -7    3.28    0.49
  17   6  -7    4.45    0.62
 -17  -6   8    1.60    0.23
 -17  -6   8    1.26    0.21
 -17  -6   8    0.52    0.24
  17   6  -8    1.44    0.20
  17   6  -8    1.54    0.26
 -17  -6   9    0.69    0.17
 -17  -6   9    0.44    0.18
  17   6  -9    0.65    0.20
  17   6  -9    0.96    0.15
 -17  -6  10    0.48    0.15
 -17  -6  10    0.07    0.11
 -17  -6  10   -0.09    0.13
  17   6 -10    0.04    0.10
  17   6 -10    0.38    0.18
  17   6 -10    0.25    0.11
 -17  -6  11   -0.20    0.14
 -17  -6  11    0.01    0.10
 -17  -6  11   -0.33    0.15
  17   6 -11   -0.21    0.09
  17   6 -11    0.03    0.10
  17   6 -11    0.46    0.32
 -17  -6  12   -0.10    0.11
 -17  -6  12   -0.06    0.14
  17   6 -12    0.05    0.10
  17   6 -12    0.02    0.09
 -17  -6  13    0.35    0.12
 -17  -6  13    0.08    0.15
  17   6 -13   -0.03    0.10
  17   6 -13    0.11    0.09
  17   6 -13   -0.75    0.33
 -17  -6  14    0.01    0.11
  17   6 -14    0.08    0.10
  17   6 -14    0.03    0.10
  17   6 -14    0.09    0.32
 -17  -6  15   -0.01    0.12
 -17  -6  15    0.03    0.14
  17   6 -15   -0.16    0.10
  17   6 -15   -0.04    0.10
  17   6 -15   -0.83    0.33
 -17  -6  16    1.28    0.30
 -17  -6  16    2.32    0.34
  17   6 -16    2.11    0.29
  17   6 -16    2.77    0.37
  17   6 -16    1.96    0.29
  17   6 -16    1.54    0.48
 -17  -6  17    0.92    0.18
 -17  -6  17    0.29    0.21
  17   6 -17    0.70    0.15
  17   6 -17    0.68    0.23
  17   6 -17    0.81    0.16
  17   6 -17    0.12    0.31
 -17  -6  18    3.48    0.51
  17   6 -18    3.98    0.49
  17   6 -18    2.73    0.59
 -17  -6  19    2.20    0.31
 -17  -6  19    1.92    0.33
  17   6 -19    2.16    0.29
  17   6 -19    1.73    0.29
  17   6 -19    1.77    0.40
 -17  -6  20    0.62    0.17
 -17  -6  20    0.86    0.22
  17   6 -20    0.67    0.15
  17   6 -20    0.75    0.16
 -17  -6  21    3.50    0.50
  17   6 -21    3.22    0.47
 -17  -6  22    0.21    0.15
  17   6 -22    0.21    0.12
 -17  -5   1    0.22    0.13
 -17  -5   1    0.43    0.12
 -17  -5   1    0.59    0.18
 -17  -5   1    0.13    0.15
  17   5  -1    0.41    0.11
  17   5  -1    0.48    0.17
  17   5  -1    0.62    0.14
  17   5  -1   -0.05    0.25
 -17  -5   2   -0.13    0.11
 -17  -5   2    0.34    0.11
 -17  -5   2    0.43    0.16
 -17  -5   2    0.29    0.16
  17   5  -2    0.28    0.10
  17   5  -2    0.57    0.16
  17   5  -2    0.55    0.12
  17   5  -2    0.07    0.28
 -17  -5   3    4.11    0.55
 -17  -5   3    4.44    0.57
 -17  -5   3    4.02    0.58
  17   5  -3    3.96    0.54
  17   5  -3    4.45    0.56
  17   5  -3    3.07    0.63
 -17  -5   4    0.54    0.15
 -17  -5   4    0.52    0.15
 -17  -5   4    0.49    0.17
 -17  -5   4    0.86    0.19
  17   5  -4    0.61    0.12
  17   5  -4    0.82    0.20
  17   5  -4    0.85    0.15
  17   5  -4    0.04    0.31
 -17  -5   5   12.27    1.52
 -17  -5   5   10.76    1.50
 -17  -5   5   11.38    1.51
 -17  -5   5   13.12    1.54
  17   5  -5   11.21    1.50
  17   5  -5   11.07    1.52
  17   5  -5   12.56    1.52
  17   5  -5   11.45    1.59
 -17  -5   6    1.19    0.22
 -17  -5   6    1.43    0.20
 -17  -5   6    0.79    0.22
 -17  -5   6    1.10    0.23
  17   5  -6    1.19    0.19
  17   5  -6    1.11    0.24
  17   5  -6    1.47    0.21
  17   5  -6    0.57    0.35
 -17  -5   7   11.10    1.48
 -17  -5   7   11.16    1.47
 -17  -5   7   11.46    1.48
 -17  -5   7   10.22    1.49
  17   5  -7   10.88    1.47
  17   5  -7   13.26    1.51
  17   5  -7   11.27    1.48
  17   5  -7   14.07    1.60
 -17  -5   8    1.89    0.31
 -17  -5   8    2.04    0.30
 -17  -5   8    1.82    0.34
  17   5  -8    2.48    0.30
  17   5  -8    2.62    0.34
  17   5  -8    1.78    0.30
 -17  -5   9    5.83    0.84
 -17  -5   9    6.02    0.84
  17   5  -9    6.53    0.84
  17   5  -9    7.67    0.87
 -17  -5  10    8.80    1.20
 -17  -5  10    8.50    1.21
  17   5 -10   10.07    1.22
  17   5 -10    9.20    1.19
 -17  -5  11    8.18    1.21
 -17  -5  11    9.81    1.21
 -17  -5  11    8.67    1.23
  17   5 -11    9.06    1.20
  17   5 -11   10.25    1.22
  17   5 -11   10.64    1.33
 -17  -5  12   10.56    1.48
 -17  -5  12   11.78    1.48
 -17  -5  12   10.50    1.50
  17   5 -12   12.08    1.47
  17   5 -12   11.14    1.48
  17   5 -12   12.37    1.57
 -17  -5  13    0.42    0.13
 -17  -5  13    0.52    0.17
  17   5 -13    0.16    0.11
  17   5 -13    0.42    0.12
 -17  -5  14   11.45    1.49
  17   5 -14   11.81    1.48
  17   5 -14   11.21    1.49
  17   5 -14   11.10    1.57
 -17  -5  15    0.81    0.19
 -17  -5  15    1.00    0.24
  17   5 -15    1.24    0.18
  17   5 -15    0.98    0.19
  17   5 -15    0.72    0.40
 -17  -5  16    5.37    0.74
 -17  -5  16    5.79    0.78
  17   5 -16    5.85    0.74
  17   5 -16    5.50    0.77
  17   5 -16    5.19    0.74
  17   5 -16    6.05    0.87
 -17  -5  17    0.95    0.22
  17   5 -17    0.76    0.23
  17   5 -17    0.69    0.16
  17   5 -17   -0.17    0.35
 -17  -5  18    2.58    0.37
 -17  -5  18    2.51    0.40
  17   5 -18    2.27    0.34
  17   5 -18    2.87    0.41
  17   5 -18    2.27    0.36
  17   5 -18    3.42    0.50
 -17  -5  19    0.84    0.17
 -17  -5  19    0.39    0.17
  17   5 -19    0.62    0.14
  17   5 -19    0.56    0.14
  17   5 -19    0.65    0.29
 -17  -5  20    0.84    0.20
 -17  -5  20    0.60    0.20
  17   5 -20    0.88    0.17
  17   5 -20    0.89    0.18
  17   5 -20    1.32    0.28
 -17  -5  21   -0.08    0.15
 -17  -5  21    0.33    0.18
  17   5 -21    0.21    0.12
  17   5 -21    0.66    0.14
 -17  -5  22    0.21    0.14
  17   5 -22    0.00    0.12
 -17  -5  23    0.22    0.14
  17   5 -23    0.26    0.14
 -17  -4   1   10.81    1.37
 -17  -4   1   10.84    1.36
 -17  -4   1   10.62    1.37
 -17  -4   1    8.60    1.37
  17   4  -1   10.80    1.36
  17   4  -1   10.89    1.38
  17   4  -1   10.62    1.37
  17   4  -1   10.81    1.44
 -17  -4   2    7.05    0.96
 -17  -4   2    7.22    0.96
 -17  -4   2    7.15    0.97
 -17  -4   2    6.63    0.98
  17   4  -2    7.48    0.95
  17   4  -2    7.45    0.98
  17   4  -2    7.54    0.96
  17   4  -2    8.68    1.06
 -17  -4   3   22.14    2.51
 -17  -4   3   19.27    2.48
 -17  -4   3   18.61    2.48
 -17  -4   3   17.83    2.49
  17   4  -3   17.37    2.46
  17   4  -3   19.97    2.50
  17   4  -3   19.66    2.49
  17   4  -3   22.84    2.59
 -17  -4   4    1.04    0.20
 -17  -4   4    1.09    0.23
 -17  -4   4    1.03    0.25
  17   4  -4    1.48    0.20
  17   4  -4    1.53    0.21
  17   4  -4    1.13    0.37
 -17  -4   5   14.71    1.96
 -17  -4   5   15.63    1.96
 -17  -4   5   15.59    1.96
 -17  -4   5   13.27    1.97
  17   4  -5   15.59    1.95
  17   4  -5   14.55    1.97
  17   4  -5   15.90    1.97
  17   4  -5   16.86    2.06
 -17  -4   6    0.18    0.11
 -17  -4   6    0.08    0.10
 -17  -4   6    0.04    0.14
 -17  -4   6    0.27    0.14
  17   4  -6    0.28    0.10
  17   4  -6    0.34    0.15
  17   4  -6    0.24    0.11
  17   4  -6   -0.93    0.35
 -17  -4   7    2.96    0.39
 -17  -4   7    2.66    0.37
 -17  -4   7    2.34    0.38
 -17  -4   7    2.16    0.40
  17   4  -7    2.75    0.36
  17   4  -7    3.03    0.40
  17   4  -7    2.42    0.37
  17   4  -7    2.78    0.51
 -17  -4   8    0.04    0.10
 -17  -4   8    0.08    0.11
 -17  -4   8   -0.10    0.13
  17   4  -8    0.11    0.10
 -17  -4   9    0.77    0.16
 -17  -4   9    0.73    0.15
 -17  -4   9    0.74    0.19
  17   4  -9    0.67    0.13
  17   4  -9    0.54    0.19
  17   4  -9    0.68    0.15
 -17  -4  10   -0.05    0.12
 -17  -4  10    0.15    0.10
 -17  -4  10    0.04    0.15
  17   4 -10    0.05    0.09
  17   4 -10    0.30    0.15
  17   4 -10    0.27    0.39
 -17  -4  11    0.39    0.13
 -17  -4  11    0.02    0.14
 -17  -4  11   -0.03    0.13
  17   4 -11    0.20    0.17
  17   4 -11    0.09    0.10
  17   4 -11    0.64    0.41
 -17  -4  12    0.27    0.13
 -17  -4  12    0.05    0.11
 -17  -4  12    0.07    0.15
  17   4 -12   -0.09    0.09
  17   4 -12    0.06    0.11
  17   4 -12   -0.23    0.45
 -17  -4  13    0.28    0.12
 -17  -4  13    0.23    0.14
  17   4 -13    0.21    0.10
  17   4 -13    0.28    0.11
  17   4 -13    0.11    0.44
 -17  -4  14    0.31    0.13
 -17  -4  14    0.35    0.18
  17   4 -14    0.46    0.11
  17   4 -14    0.29    0.11
 -17  -4  15    0.08    0.12
 -17  -4  15   -0.13    0.14
  17   4 -15   -0.02    0.09
  17   4 -15    0.23    0.10
  17   4 -15   -1.09    0.41
 -17  -4  16    5.04    0.70
 -17  -4  16    5.32    0.73
  17   4 -16    5.79    0.69
  17   4 -16    5.59    0.73
  17   4 -16    4.71    0.70
  17   4 -16    4.10    0.83
 -17  -4  17   -0.14    0.12
 -17  -4  17   -0.08    0.15
  17   4 -17    0.23    0.10
  17   4 -17    0.29    0.19
  17   4 -17    0.10    0.10
  17   4 -17   -0.95    0.41
 -17  -4  18    4.06    0.53
 -17  -4  18    3.82    0.55
  17   4 -18    3.84    0.51
  17   4 -18    4.89    0.58
  17   4 -18    3.14    0.51
  17   4 -18    2.98    0.66
 -17  -4  19    0.54    0.16
  17   4 -19    0.68    0.14
  17   4 -19    0.06    0.34
 -17  -4  20    2.10    0.27
 -17  -4  20    1.71    0.28
  17   4 -20    1.38    0.24
  17   4 -20    1.42    0.25
  17   4 -20    0.74    0.34
 -17  -4  21    2.28    0.33
 -17  -4  21    2.00    0.36
  17   4 -21    1.96    0.31
  17   4 -21    2.23    0.32
 -17  -4  22    1.57    0.29
  17   4 -22    1.53    0.25
 -17  -4  23    1.69    0.30
 -17  -3   1    0.03    0.10
 -17  -3   1   -0.09    0.14
 -17  -3   1    0.25    0.14
  17   3  -1    0.17    0.13
  17   3  -1    0.09    0.10
  17   3  -1    0.32    0.29
 -17  -3   2    0.91    0.18
 -17  -3   2    1.17    0.18
 -17  -3   2    0.73    0.19
 -17  -3   2    1.15    0.22
  17   3  -2    1.01    0.16
  17   3  -2    0.80    0.20
  17   3  -2    0.89    0.17
  17   3  -2    0.61    0.36
 -17  -3   3    1.11    0.25
 -17  -3   3    1.77    0.25
 -17  -3   3    1.82    0.28
 -17  -3   3    1.40    0.28
  17   3  -3    1.64    0.24
  17   3  -3    2.04    0.28
  17   3  -3    1.74    0.26
  17   3  -3    1.31    0.44
 -17  -3   4    0.47    0.13
 -17  -3   4    0.36    0.13
 -17  -3   4    0.65    0.16
 -17  -3   4    0.43    0.16
  17   3  -4    0.51    0.10
  17   3  -4    0.67    0.16
  17   3  -4    0.29    0.11
  17   3  -4    0.39    0.34
 -17  -3   5   10.93    1.45
 -17  -3   5   11.50    1.46
 -17  -3   5   11.43    1.48
  17   3  -5   11.11    1.45
 -17  -3   6    1.91    0.26
 -17  -3   6    1.67    0.28
  17   3  -6    1.48    0.23
  17   3  -6    1.49    0.27
  17   3  -6    1.67    0.25
  17   3  -6    1.08    0.46
 -17  -3   7   11.07    1.59
 -17  -3   7   12.88    1.59
 -17  -3   7   13.11    1.59
 -17  -3   7   11.48    1.61
  17   3  -7   12.29    1.58
  17   3  -7   14.02    1.62
  17   3  -7   11.40    1.58
  17   3  -7   12.21    1.69
 -17  -3   8    1.08    0.17
 -17  -3   8    0.77    0.16
 -17  -3   8    0.60    0.18
  17   3  -8    0.93    0.14
  17   3  -8    0.82    0.19
  17   3  -8    0.49    0.14
 -17  -3   9   14.35    1.89
 -17  -3   9   13.95    1.88
 -17  -3   9   13.90    1.90
  17   3  -9   14.29    1.87
  17   3  -9   16.38    1.91
  17   3  -9   15.08    1.89
 -17  -3  10    7.02    0.91
 -17  -3  10    6.99    0.90
 -17  -3  10    6.65    0.90
 -17  -3  10    6.68    0.93
  17   3 -10    6.89    0.89
  17   3 -10    6.95    0.92
  17   3 -10    6.55    0.90
  17   3 -10    7.28    1.08
 -17  -3  11   11.29    1.56
 -17  -3  11   12.15    1.55
  17   3 -11   12.67    1.58
  17   3 -11   12.08    1.66
 -17  -3  12    6.70    0.87
 -17  -3  12    6.48    0.87
 -17  -3  12    6.14    0.90
  17   3 -12    6.87    0.86
  17   3 -12    6.42    0.87
  17   3 -12    7.26    1.00
 -17  -3  13    0.45    0.14
 -17  -3  13    0.41    0.17
  17   3 -13    0.63    0.12
  17   3 -13    0.65    0.14
  17   3 -13   -0.02    0.43
 -17  -3  14    8.96    1.12
 -17  -3  14    8.23    1.14
  17   3 -14    8.51    1.11
  17   3 -14    8.23    1.12
  17   3 -14    8.74    1.23
 -17  -3  15    0.19    0.13
 -17  -3  15    0.19    0.14
  17   3 -15    0.30    0.10
  17   3 -15   -0.14    0.18
  17   3 -15    0.13    0.10
 -17  -3  16    4.69    0.62
 -17  -3  16    4.32    0.65
  17   3 -16    4.74    0.61
  17   3 -16    4.61    0.65
  17   3 -16    4.40    0.62
  17   3 -16    4.42    0.75
 -17  -3  17    0.08    0.13
 -17  -3  17   -0.23    0.15
  17   3 -17    0.05    0.10
  17   3 -17   -0.07    0.17
  17   3 -17   -0.11    0.11
  17   3 -17    0.08    0.40
 -17  -3  18    2.85    0.42
  17   3 -18    2.26    0.37
  17   3 -18    3.10    0.42
  17   3 -18    2.99    0.39
  17   3 -18    2.23    0.53
 -17  -3  19    0.09    0.13
  17   3 -19   -0.02    0.10
  17   3 -19    0.16    0.20
  17   3 -19    0.23    0.34
 -17  -3  20    1.26    0.21
 -17  -3  20    1.02    0.24
  17   3 -20    1.02    0.18
  17   3 -20    0.93    0.19
  17   3 -20    0.32    0.31
 -17  -3  21    0.76    0.17
 -17  -3  21    0.58    0.17
  17   3 -21    0.30    0.14
  17   3 -21    0.80    0.15
 -17  -3  22   -0.01    0.16
  17   3 -22   -0.11    0.13
 -17  -3  23    0.42    0.17
  17   3 -23    0.43    0.16
 -17  -2   1    3.09    0.48
 -17  -2   1    3.29    0.51
  17   2  -1    3.70    0.47
  17   2  -1    4.58    0.51
  17   2  -1    3.34    0.48
 -17  -2   2   12.45    1.53
 -17  -2   2   10.82    1.51
 -17  -2   2   11.16    1.54
  17   2  -2   11.59    1.53
  17   2  -2   12.71    1.53
 -17  -2   3   14.54    1.89
 -17  -2   3   14.78    1.88
 -17  -2   3   13.73    1.88
 -17  -2   3   13.65    1.90
  17   2  -3   14.66    1.88
  17   2  -3   15.74    1.90
  17   2  -3   15.22    1.89
 -17  -2   4    3.08    0.49
 -17  -2   4    4.15    0.49
 -17  -2   4    3.61    0.49
 -17  -2   4    3.18    0.51
  17   2  -4    3.43    0.47
  17   2  -4    3.21    0.50
  17   2  -4    4.15    0.49
  17   2  -4    3.28    0.66
 -17  -2   5    8.31    1.04
 -17  -2   5    7.63    1.02
 -17  -2   5    7.64    1.02
 -17  -2   5    6.73    1.04
  17   2  -5    8.07    1.02
  17   2  -5    8.19    1.04
  17   2  -5    8.15    1.03
  17   2  -5    7.93    1.13
 -17  -2   6    0.69    0.17
 -17  -2   6    1.13    0.19
 -17  -2   6    0.57    0.20
  17   2  -6    1.12    0.16
  17   2  -6    1.16    0.18
  17   2  -6    1.81    0.46
 -17  -2   7    1.68    0.25
 -17  -2   7    1.45    0.23
 -17  -2   7    1.46    0.23
 -17  -2   7    1.20    0.26
  17   2  -7    1.72    0.22
  17   2  -7    1.24    0.26
  17   2  -7    1.46    0.23
  17   2  -7    1.13    0.48
 -17  -2   8    0.25    0.13
 -17  -2   8    0.11    0.10
 -17  -2   8    0.06    0.14
  17   2  -8    0.03    0.09
  17   2  -8    0.18    0.14
  17   2  -8    0.07    0.09
 -17  -2   9    1.32    0.22
 -17  -2   9    0.98    0.19
 -17  -2   9    0.87    0.22
  17   2  -9    1.01    0.17
  17   2  -9    1.25    0.23
  17   2  -9    1.27    0.20
 -17  -2  10    0.76    0.19
 -17  -2  10    0.69    0.16
 -17  -2  10    1.08    0.21
  17   2 -10    0.86    0.15
  17   2 -10    0.82    0.20
  17   2 -10    1.25    0.18
  17   2 -10    1.47    0.50
 -17  -2  11    0.09    0.12
 -17  -2  11   -0.13    0.11
 -17  -2  11   -0.07    0.10
 -17  -2  11    0.24    0.14
  17   2 -11    0.18    0.09
  17   2 -11    0.04    0.15
  17   2 -11    0.14    0.10
  17   2 -11   -0.35    0.41
 -17  -2  12    0.56    0.17
 -17  -2  12    0.77    0.15
  17   2 -12    0.75    0.15
  17   2 -12    1.82    0.45
 -17  -2  13    0.46    0.14
 -17  -2  13    1.11    0.19
  17   2 -13    0.41    0.12
  17   2 -13    0.26    0.12
  17   2 -13    1.10    0.40
 -17  -2  14    1.17    0.18
 -17  -2  14    1.06    0.21
  17   2 -14    0.83    0.16
  17   2 -14    0.60    0.16
  17   2 -14    0.39    0.40
 -17  -2  15    0.29    0.13
 -17  -2  15    0.54    0.17
  17   2 -15    0.45    0.11
  17   2 -15    0.19    0.17
  17   2 -15    0.21    0.11
 -17  -2  16    6.18    0.79
 -17  -2  16    6.80    0.83
  17   2 -16    5.34    0.77
  17   2 -16    6.80    0.82
  17   2 -16    5.27    0.78
  17   2 -16    6.45    0.89
 -17  -2  17    0.21    0.13
 -17  -2  17    0.03    0.15
  17   2 -17    0.21    0.11
  17   2 -17    0.12    0.14
  17   2 -17    0.00    0.10
  17   2 -17   -0.18    0.37
 -17  -2  18    4.99    0.71
  17   2 -18    5.72    0.71
  17   2 -18    4.52    0.68
  17   2 -18    5.58    0.79
 -17  -2  19   -0.13    0.12
 -17  -2  19    0.29    0.17
  17   2 -19    0.23    0.12
  17   2 -19    0.53    0.36
 -17  -2  20    3.22    0.44
 -17  -2  20    3.05    0.47
  17   2 -20    3.29    0.43
  17   2 -20    2.84    0.44
  17   2 -20    2.79    0.55
 -17  -2  21    1.80    0.23
 -17  -2  21    1.16    0.27
  17   2 -21    1.08    0.20
  17   2 -21    0.98    0.22
 -17  -2  22    2.83    0.44
  17   2 -22    2.97    0.43
  17   2 -23    1.52    0.28
 -17  -1   1    0.06    0.09
 -17  -1   1    0.03    0.10
 -17  -1   1   -0.31    0.12
 -17  -1   1   -0.12    0.12
  17   1  -1   -0.04    0.08
  17   1  -1   -0.15    0.12
  17   1  -1   -0.07    0.11
  17   1  -1    0.21    0.40
 -17  -1   2    0.02    0.11
 -17  -1   2    0.20    0.13
 -17  -1   2   -0.24    0.13
  17   1  -2   -0.10    0.11
  17   1  -2    0.08    0.10
  17   1  -2    0.22    0.36
 -17  -1   3    0.29    0.12
 -17  -1   3    0.07    0.10
 -17  -1   3    0.26    0.14
  17   1  -3    0.06    0.08
  17   1  -3    0.11    0.12
  17   1  -3   -0.22    0.10
 -17  -1   4    2.53    0.39
 -17  -1   4    2.51    0.39
 -17  -1   4    2.74    0.41
  17   1  -4    3.35    0.38
  17   1  -4    2.67    0.40
  17   1  -4    2.63    0.39
 -17  -1   5    4.41    0.62
 -17  -1   5    3.61    0.61
 -17  -1   5    5.50    0.62
 -17  -1   5    4.94    0.65
  17   1  -5    4.82    0.61
  17   1  -5    4.90    0.63
  17   1  -5    4.66    0.62
  17   1  -5    4.95    0.79
 -17  -1   6    6.08    0.82
 -17  -1   6    5.74    0.82
 -17  -1   6    6.00    0.85
  17   1  -6    6.81    0.82
  17   1  -6    6.44    0.83
  17   1  -6    7.25    0.96
 -17  -1   7    9.09    1.16
 -17  -1   7    8.94    1.14
 -17  -1   7    8.74    1.14
 -17  -1   7    8.29    1.17
 -17  -1   8    0.34    0.13
 -17  -1   8    0.13    0.11
 -17  -1   8    0.27    0.11
 -17  -1   8    0.56    0.17
  17   1  -8    0.32    0.10
  17   1  -8    0.31    0.16
  17   1  -8    0.37    0.11
 -17  -1   9   26.21    3.48
 -17  -1   9   27.83    3.48
 -17  -1   9   28.19    3.52
  17   1  -9   26.37    3.47
  17   1  -9   28.57    3.50
  17   1  -9   26.06    3.48
 -17  -1  10    0.42    0.14
 -17  -1  10    0.60    0.14
 -17  -1  10    0.77    0.18
  17   1 -10    0.74    0.12
  17   1 -10    0.66    0.16
  17   1 -10    0.35    0.13
 -17  -1  11   14.37    1.75
 -17  -1  11   13.47    1.73
 -17  -1  11   13.01    1.73
 -17  -1  11   12.80    1.76
  17   1 -11   13.39    1.73
  17   1 -11   15.26    1.76
  17   1 -11   12.61    1.74
  17   1 -11   12.81    1.75
 -17  -1  12    2.51    0.34
  17   1 -12    2.07    0.40
 -17  -1  13    3.22    0.53
 -17  -1  13    4.51    0.54
 -17  -1  13    3.71    0.56
  17   1 -13    4.02    0.52
  17   1 -13    4.64    0.55
  17   1 -13    3.60    0.57
 -17  -1  14    9.04    1.14
 -17  -1  14    8.67    1.16
  17   1 -14    8.62    1.12
  17   1 -14    8.62    1.14
  17   1 -14    8.35    1.15
 -17  -1  15    0.99    0.20
 -17  -1  15    1.38    0.25
  17   1 -15    1.12    0.18
  17   1 -15    0.87    0.23
  17   1 -15    1.36    0.21
 -17  -1  16   10.35    1.31
 -17  -1  16   10.20    1.34
  17   1 -16    9.73    1.29
  17   1 -16    9.90    1.32
  17   1 -16    9.76    1.31
  17   1 -16   10.31    1.33
 -17  -1  17    0.04    0.12
 -17  -1  17    0.34    0.17
  17   1 -17   -0.08    0.09
  17   1 -17    0.29    0.17
  17   1 -17   -0.08    0.11
  17   1 -17    0.13    0.22
 -17  -1  18    5.06    0.70
  17   1 -18    3.89    0.67
  17   1 -18    5.55    0.67
  17   1 -18    5.28    0.70
 -17  -1  19    0.65    0.17
 -17  -1  19    0.41    0.18
  17   1 -19    0.67    0.14
  17   1 -19    0.66    0.21
  17   1 -19    0.73    0.15
  17   1 -19   -0.01    0.26
 -17  -1  20    1.27    0.28
 -17  -1  20    2.06    0.33
  17   1 -20    1.54    0.25
  17   1 -20    2.11    0.28
  17   1 -20    2.02    0.35
 -17  -1  21    1.26    0.23
 -17  -1  21    1.33    0.24
  17   1 -21    1.15    0.20
  17   1 -21    1.09    0.21
 -17  -1  22   -0.21    0.15
 -17  -1  22   -0.06    0.14
  17   1 -22    0.13    0.11
  17   1 -22    0.02    0.12
 -17  -1  23    0.11    0.17
  17   1 -23    0.07    0.13
 -17   0   1    0.23    0.10
 -17   0   1    0.51    0.11
 -17   0   1   -0.06    0.12
 -17   0   1    0.08    0.14
  17   0  -1    0.28    0.09
  17   0  -1    0.42    0.13
  17   0  -1    0.32    0.11
  17   0  -1    0.45    0.38
 -17   0   2   17.01    2.22
 -17   0   2   17.31    2.21
 -17   0   2   17.12    2.24
  17   0  -2   15.78    2.21
  17   0  -2   18.72    2.23
  17   0  -2   17.66    2.28
 -17   0   3    4.69    0.62
 -17   0   3    5.03    0.62
 -17   0   3    3.84    0.60
 -17   0   3    4.69    0.64
  17   0  -3    4.59    0.60
  17   0  -3    4.52    0.63
  17   0  -3    4.77    0.62
  17   0  -3    6.82    0.80
[truncated: 6,460,681 more chars]
