# Supplementary material for: Platinum(0)-η2-1,2-(E)ditosylethene Complexes Bearing Phosphine, Isocyanide and N-Heterocyclic Carbene Ligands: Synthesis and Cytotoxicity towards Ovarian and Breast Cancer Cells
Source: Molecules. 2024 Mar 1;29(5):1119. doi: 10.3390/molecules29051119 (PMC10934098; doi:10.3390/molecules29051119)
Supplement: Supplementary file 1 [file molecules-29-01119-s001.zip › 3a.cif]

data_NC1

_publ_section_title
;
Platinum - trans-sulfone based organometallic complexes
;
 
_publ_contact_author_name        'Nicola Demitri'
_publ_contact_author_address     
;
Elettra-Sincrotrone Trieste, S.S. 14 Km 163.5 in Area Science Park, 
34149 Basovizza - Trieste, Italy.
;
_publ_contact_author_email       nicola.demitri@elettra.eu
_publ_contact_author_phone       '+39 040 375 8861'
loop_
_publ_author_name
_publ_author_address
'Demitri, Nicola'
;
Elettra-Sincrotrone Trieste, S.S. 14 Km 163.5 in Area Science Park, 
34149 Basovizza-Trieste, Italy.
;
'Visentin, Fabiano'
;
Dipartimento di Scienze Molecolari e Nanosistemi, Universita' Ca' Foscari,
Campus Scientifico - Via Torino 155, 30174 Venezia-Mestre, Italy.
;

_publ_section_abstract
;
The structure of NC1, PtC~34~H~34~N~2~O~4~S~2~, at 100 K has
monoclinic (<i>P</i>2~1~<i>/c</i>) symmetry. 
;
_publ_contact_letter 
;
Please consider this CIF for publication. I certify that this contibution is the
original work of those listed as authors; that it has not been published
before (in any language or medium) and is not being considered for publication
elsewhere; that all authors concur with and are aware of the submission; that
all workers involved in the study are listed as authors or given proper credit
in the acknowledgements; that I have obtained permission for and acknowledged
the source of any excerpts from other copyright works; and that to the best of
my knowledge the paper contains no statements which are libellous, unlawful or
in any way actionable. All coauthors have made significant scientific
contributions to the work reported, including the ideas and their execution,
and share responsibility and accountability for the results.
;

_audit_creation_method            'SHELXL-2019/3'
_shelx_SHELXL_version_number      '2019/3'
_chemical_name_systematic         ?
_chemical_name_common             ?
_chemical_melting_point           ?
_chemical_formula_moiety
 'C34 H34 N2 O4 Pt S2'
_chemical_formula_sum
 'C34 H34 N2 O4 Pt S2'
_chemical_formula_weight          793.84

loop_
 _atom_type_symbol
 _atom_type_description
 _atom_type_scat_dispersion_real
 _atom_type_scat_dispersion_imag
 _atom_type_scat_source
 'C'  'C'   0.0020   0.0012
 'International Tables Vol C Tables 4.2.6.8 and 6.1.1.4'
 'N'  'N'   0.0042   0.0025
 'International Tables Vol C Tables 4.2.6.8 and 6.1.1.4'
 'O'  'O'   0.0077   0.0045
 'International Tables Vol C Tables 4.2.6.8 and 6.1.1.4'
 'S'  'S'   0.0994   0.0945
 'International Tables Vol C Tables 4.2.6.8 and 6.1.1.4'
 'Pt'  'Pt'  -0.8479   6.7557
 'International Tables Vol C Tables 4.2.6.8 and 6.1.1.4'
 'H'  'H'   0.0000   0.0000
 'International Tables Vol C Tables 4.2.6.8 and 6.1.1.4'
 
_space_group_crystal_system       monoclinic
_space_group_IT_number            14
_space_group_name_H-M_alt         'P 21/c'
_space_group_name_Hall            '-P 2ybc'
 
_shelx_space_group_comment
;
The symmetry employed for this shelxl refinement is uniquely defined
by the following loop, which should always be used as a source of
symmetry information in preference to the above space-group names.
They are only intended as comments.
;
 
loop_
 _space_group_symop_operation_xyz
 'x, y, z'
 '-x, y+1/2, -z+1/2'
 '-x, -y, -z'
 'x, -y-1/2, z-1/2'
 
_cell_length_a                    15.496(3)
_cell_length_b                    9.010(2)
_cell_length_c                    23.067(5)
_cell_angle_alpha                 90
_cell_angle_beta                  101.56(3)
_cell_angle_gamma                 90
_cell_volume                      3155.2(11)
_cell_formula_units_Z             4
_cell_measurement_temperature     100(2)
_cell_measurement_reflns_used     16459
_cell_measurement_theta_min       1.170
_cell_measurement_theta_max       27.122
 
_exptl_crystal_description        'Thin blocks'
_exptl_crystal_colour             'Colourless'
_exptl_crystal_density_meas       ?
_exptl_crystal_density_method     ?
_exptl_crystal_density_diffrn     1.671          
_exptl_crystal_F_000              1576
_exptl_transmission_factor_min    ?
_exptl_transmission_factor_max    ?
_exptl_crystal_size_max           0.100
_exptl_crystal_size_mid           0.050
_exptl_crystal_size_min           0.020
_exptl_absorpt_coefficient_mu     3.232
_shelx_estimated_absorpt_T_min    0.738
_shelx_estimated_absorpt_T_max    0.938
_exptl_absorpt_correction_type    none
_exptl_absorpt_correction_T_min   ?
_exptl_absorpt_correction_T_max   ?
_exptl_absorpt_process_details    ?
_exptl_absorpt_special_details    ?
_diffrn_ambient_temperature       100(2)
_diffrn_radiation_wavelength      0.620

_diffrn_measurement_method       'Rotating crystal'
_diffrn_radiation_type           Synchrotron
_diffrn_source                   'Elettra Synchrotron - XRD2 BL'
_diffrn_measurement_device_type  
;
'Arinax MD2s Goniometer, Pilatus 6M detector'
;
_diffrn_detector_area_resol_mean  ?
_diffrn_reflns_number             60938
_diffrn_reflns_av_unetI/netI      0.0237
_diffrn_reflns_av_R_equivalents   0.0397
_diffrn_reflns_limit_h_min        -22
_diffrn_reflns_limit_h_max        22
_diffrn_reflns_limit_k_min        -13
_diffrn_reflns_limit_k_max        13
_diffrn_reflns_limit_l_min        -33
_diffrn_reflns_limit_l_max        33
_diffrn_reflns_theta_min          1.170
_diffrn_reflns_theta_max          27.122
_diffrn_reflns_theta_full         21.839
_diffrn_measured_fraction_theta_max   0.992
_diffrn_measured_fraction_theta_full  0.989
_diffrn_reflns_Laue_measured_fraction_max    0.992
_diffrn_reflns_Laue_measured_fraction_full   0.989
_diffrn_reflns_point_group_measured_fraction_max   0.992
_diffrn_reflns_point_group_measured_fraction_full  0.989
_reflns_number_total              10435
_reflns_number_gt                 9184
_reflns_threshold_expression      'I > 2\s(I)'
_reflns_Friedel_coverage          0.000
_reflns_Friedel_fraction_max      .
_reflns_Friedel_fraction_full     .
 
_reflns_special_details
;
 Reflections were merged by SHELXL according to the crystal
 class for the calculation of statistics and refinement.
 
 _reflns_Friedel_fraction is defined as the number of unique
 Friedel pairs measured divided by the number that would be
 possible theoretically, ignoring centric projections and
 systematic absences.
;

_diffrn_standards_number 0
_diffrn_standards_interval_count 0
_diffrn_standards_decay_% 0
 
_computing_data_collection       'Elettra XRD2 Data Collection SW'
_computing_cell_refinement       'XDS (Kabsch, 2010)'
_computing_data_reduction        'XDS (Kabsch, 2010)'
_computing_structure_solution    'SHELXT (Sheldrick, 2015)'
_computing_structure_refinement 'SHELXL-2019/3 (Sheldrick, 2015)'
_computing_molecular_graphics    'Ortep3 for Windows - Coot'
_computing_publication_material  'enCIFer - publCIF'
 
_refine_special_details
;
Hydrogen atoms were included at calculated positions with isotropic 
Ufactors=1.2Ueq or Ufactors=1.5Ueq for methyl groups. Anisotropic thermal
motion modeling has been applied to all atoms.
;

_refine_ls_structure_factor_coef  Fsqd
_refine_ls_matrix_type            full
_refine_ls_weighting_scheme       calc
_refine_ls_weighting_details
'w=1/[\s^2^(Fo^2^)+(0.0399P)^2^+2.2751P] where P=(Fo^2^+2Fc^2^)/3'
_atom_sites_solution_primary      direct
_atom_sites_solution_secondary    difmap
_atom_sites_solution_hydrogens    geom
_refine_ls_hydrogen_treatment     constr
_refine_ls_extinction_method      none
_refine_ls_extinction_coef        .
_refine_ls_number_reflns          10435
_refine_ls_number_parameters      394
_refine_ls_number_restraints      0
_refine_ls_R_factor_all           0.0337
_refine_ls_R_factor_gt            0.0289
_refine_ls_wR_factor_ref          0.0767
_refine_ls_wR_factor_gt           0.0745
_refine_ls_goodness_of_fit_ref    1.105
_refine_ls_restrained_S_all       1.105
_refine_ls_shift/su_max           0.007
_refine_ls_shift/su_mean          0.000
 
loop_
 _atom_site_label
 _atom_site_type_symbol
 _atom_site_fract_x
 _atom_site_fract_y
 _atom_site_fract_z
 _atom_site_U_iso_or_equiv
 _atom_site_adp_type
 _atom_site_occupancy
 _atom_site_site_symmetry_order  
 _atom_site_calc_flag
 _atom_site_refinement_flags_posn
 _atom_site_refinement_flags_adp
 _atom_site_refinement_flags_occupancy
 _atom_site_disorder_assembly
 _atom_site_disorder_group
Pt_1 Pt 0.68995(2) 0.32415(2) 0.58825(2) 0.02647(4) Uani 1 1 d . . . . .
C8_2 C 0.97769(17) 0.1962(3) 0.73501(13) 0.0314(5) Uani 1 1 d . . . . .
H8_2 H 0.926769 0.136703 0.733889 0.038 Uiso 1 1 calc R U . . .
C7_2 C 1.0429(2) 0.1992(3) 0.78579(13) 0.0351(6) Uani 1 1 d . . . . .
H7_2 H 1.035484 0.144348 0.819620 0.042 Uiso 1 1 calc R U . . .
C6_2 C 1.11899(19) 0.2818(3) 0.78762(14) 0.0365(6) Uani 1 1 d . . . . .
C9_2 C 1.1905(2) 0.2870(4) 0.84205(17) 0.0506(9) Uani 1 1 d . . . . .
H9A_2 H 1.168531 0.245368 0.875578 0.076 Uiso 1 1 calc R U . . .
H9B_2 H 1.208594 0.390217 0.850693 0.076 Uiso 1 1 calc R U . . .
H9C_2 H 1.241121 0.228901 0.835459 0.076 Uiso 1 1 calc R U . . .
C5_2 C 1.1282(2) 0.3602(4) 0.73740(16) 0.0405(6) Uani 1 1 d . . . . .
H5_2 H 1.180792 0.414350 0.737584 0.049 Uiso 1 1 calc R U . . .
C4_2 C 1.06203(19) 0.3610(3) 0.68690(14) 0.0359(6) Uani 1 1 d . . . . .
H4_2 H 1.068825 0.417408 0.653299 0.043 Uiso 1 1 calc R U . . .
C3_2 C 0.98600(16) 0.2790(3) 0.68589(11) 0.0281(4) Uani 1 1 d . . . . .
S1_2 S 0.90109(4) 0.28044(8) 0.62187(3) 0.02798(11) Uani 1 1 d . . . . .
O1_2 O 0.92904(15) 0.3778(3) 0.57961(9) 0.0406(5) Uani 1 1 d . . . . .
O2_2 O 0.88014(14) 0.1282(3) 0.60566(9) 0.0356(4) Uani 1 1 d . . . . .
C1_2 C 0.81060(16) 0.3613(3) 0.64401(11) 0.0263(4) Uani 1 1 d . . . . .
H1_2 H 0.820165 0.464347 0.660079 0.032 Uiso 1 1 calc R U . . .
C2_2 C 0.75313(16) 0.2669(3) 0.67242(11) 0.0269(4) Uani 1 1 d . . . . .
H2_2 H 0.771243 0.160551 0.678078 0.032 Uiso 1 1 calc R U . . .
S2_2 S 0.70806(4) 0.34510(8) 0.72918(3) 0.02945(12) Uani 1 1 d . . . . .
O4_2 O 0.63433(14) 0.2556(3) 0.73709(10) 0.0429(5) Uani 1 1 d . . . . .
O3_2 O 0.69512(15) 0.5016(2) 0.71786(9) 0.0374(4) Uani 1 1 d . . . . .
C10_2 C 0.79062(17) 0.3260(3) 0.79355(11) 0.0267(4) Uani 1 1 d . . . . .
C15_2 C 0.79236(19) 0.2007(3) 0.82846(13) 0.0320(5) Uani 1 1 d . . . . .
H15_2 H 0.749905 0.124362 0.817597 0.038 Uiso 1 1 calc R U . . .
C14_2 C 0.8570(2) 0.1878(3) 0.87968(13) 0.0332(5) Uani 1 1 d . . . . .
H14_2 H 0.857860 0.102934 0.904249 0.040 Uiso 1 1 calc R U . . .
C13_2 C 0.92057(19) 0.2980(3) 0.89529(12) 0.0340(5) Uani 1 1 d . . . . .
C16_2 C 0.9912(2) 0.2807(5) 0.95028(14) 0.0492(8) Uani 1 1 d . . . . .
H16A_2 H 0.963995 0.253265 0.983645 0.074 Uiso 1 1 calc R U . . .
H16B_2 H 1.022924 0.374658 0.959010 0.074 Uiso 1 1 calc R U . . .
H16C_2 H 1.032443 0.202804 0.943920 0.074 Uiso 1 1 calc R U . . .
C12_2 C 0.91781(19) 0.4223(3) 0.85955(12) 0.0327(5) Uani 1 1 d . . . . .
H12_2 H 0.960820 0.497930 0.870054 0.039 Uiso 1 1 calc R U . . .
C11_2 C 0.85334(18) 0.4381(3) 0.80874(11) 0.0294(5) Uani 1 1 d . . . . .
H11_2 H 0.851850 0.523934 0.784620 0.035 Uiso 1 1 calc R U . . .
C7_3 C 0.4772(3) -0.0138(4) 0.66164(14) 0.0477(7) Uani 1 1 d . . . . .
H7A_3 H 0.448768 -0.062641 0.690841 0.071 Uiso 1 1 calc R U . . .
H7B_3 H 0.495510 0.086450 0.675328 0.071 Uiso 1 1 calc R U . . .
H7C_3 H 0.528963 -0.071269 0.656740 0.071 Uiso 1 1 calc R U . . .
C2_3 C 0.4134(2) -0.0046(4) 0.60339(13) 0.0371(6) Uani 1 1 d . . . . .
C3_3 C 0.3354(2) -0.0852(4) 0.59215(16) 0.0438(7) Uani 1 1 d . . . . .
H3_3 H 0.321274 -0.147221 0.622240 0.053 Uiso 1 1 calc R U . . .
C4_3 C 0.2784(2) -0.0772(4) 0.53843(16) 0.0428(7) Uani 1 1 d . . . . .
H4_3 H 0.225300 -0.132992 0.532058 0.051 Uiso 1 1 calc R U . . .
C5_3 C 0.29700(18) 0.0112(3) 0.49330(14) 0.0366(6) Uani 1 1 d . . . . .
H5_3 H 0.257188 0.014305 0.456193 0.044 Uiso 1 1 calc R U . . .
C6_3 C 0.37349(17) 0.0952(3) 0.50210(12) 0.0313(5) Uani 1 1 d . . . . .
C8_3 C 0.3965(2) 0.1916(4) 0.45427(15) 0.0398(6) Uani 1 1 d . . . . .
H8A_3 H 0.395506 0.296011 0.465992 0.060 Uiso 1 1 calc R U . . .
H8B_3 H 0.353448 0.175805 0.417403 0.060 Uiso 1 1 calc R U . . .
H8C_3 H 0.455456 0.165794 0.448190 0.060 Uiso 1 1 calc R U . . .
C1_3 C 0.42989(17) 0.0853(3) 0.55739(12) 0.0306(5) Uani 1 1 d . . . . .
N_3 N 0.50734(16) 0.1673(3) 0.56682(11) 0.0324(5) Uani 1 1 d . . . . .
C_3 C 0.57351(17) 0.2310(3) 0.57373(11) 0.0303(5) Uani 1 1 d . . . . .
C7_4 C 0.5226(2) 0.4377(4) 0.37823(18) 0.0479(8) Uani 1 1 d . . . . .
H7A_4 H 0.471307 0.452648 0.346183 0.072 Uiso 1 1 calc R U . . .
H7B_4 H 0.506223 0.458699 0.416303 0.072 Uiso 1 1 calc R U . . .
H7C_4 H 0.542733 0.334711 0.377741 0.072 Uiso 1 1 calc R U . . .
C2_4 C 0.59527(18) 0.5404(3) 0.36977(12) 0.0324(5) Uani 1 1 d . . . . .
C3_4 C 0.5907(2) 0.6215(4) 0.31812(14) 0.0439(7) Uani 1 1 d . . . . .
H3_4 H 0.540849 0.611437 0.286812 0.053 Uiso 1 1 calc R U . . .
C4_4 C 0.6583(3) 0.7171(4) 0.31185(17) 0.0509(8) Uani 1 1 d . . . . .
H4_4 H 0.654337 0.771589 0.276156 0.061 Uiso 1 1 calc R U . . .
C5_4 C 0.7311(3) 0.7341(4) 0.35664(18) 0.0478(8) Uani 1 1 d . . . . .
H5_4 H 0.776458 0.800670 0.351412 0.057 Uiso 1 1 calc R U . . .
C6_4 C 0.7393(2) 0.6561(3) 0.40915(14) 0.0360(6) Uani 1 1 d . . . . .
C8_4 C 0.8171(2) 0.6757(4) 0.4589(2) 0.0527(9) Uani 1 1 d . . . . .
H8A_4 H 0.863461 0.730216 0.444561 0.079 Uiso 1 1 calc R U . . .
H8B_4 H 0.839494 0.578191 0.473556 0.079 Uiso 1 1 calc R U . . .
H8C_4 H 0.799280 0.731639 0.490951 0.079 Uiso 1 1 calc R U . . .
C1_4 C 0.67048(17) 0.5605(3) 0.41399(11) 0.0292(5) Uani 1 1 d . . . . .
N_4 N 0.67649(17) 0.4824(3) 0.46693(10) 0.0346(5) Uani 1 1 d . . . . .
C_4 C 0.68189(18) 0.4220(3) 0.51135(12) 0.0322(5) Uani 1 1 d . . . . .
 
loop_
 _atom_site_aniso_label
 _atom_site_aniso_U_11
 _atom_site_aniso_U_22
 _atom_site_aniso_U_33
 _atom_site_aniso_U_23
 _atom_site_aniso_U_13
 _atom_site_aniso_U_12
Pt_1 0.02297(5) 0.03106(6) 0.02317(5) -0.00138(3) -0.00068(3) 0.00086(3)
C8_2 0.0191(10) 0.0409(14) 0.0324(12) 0.0034(10) 0.0006(9) -0.0003(9)
C7_2 0.0325(13) 0.0393(14) 0.0314(12) -0.0006(11) 0.0014(10) 0.0085(10)
C6_2 0.0317(13) 0.0339(13) 0.0384(14) -0.0105(11) -0.0065(11) 0.0065(10)
C9_2 0.0459(18) 0.0435(16) 0.0508(19) -0.0150(15) -0.0178(15) 0.0071(14)
C5_2 0.0298(13) 0.0376(14) 0.0512(17) -0.0094(13) 0.0013(12) -0.0044(11)
C4_2 0.0294(12) 0.0374(14) 0.0409(14) -0.0029(12) 0.0068(11) -0.0039(10)
C3_2 0.0228(10) 0.0321(12) 0.0289(11) -0.0037(10) 0.0039(8) 0.0005(9)
S1_2 0.0241(3) 0.0343(3) 0.0249(2) -0.0022(2) 0.0035(2) 0.0003(2)
O1_2 0.0378(11) 0.0538(13) 0.0316(10) 0.0057(9) 0.0101(8) -0.0019(10)
O2_2 0.0303(9) 0.0373(10) 0.0367(10) -0.0111(9) 0.0005(8) 0.0030(8)
C1_2 0.0233(10) 0.0288(11) 0.0255(10) -0.0005(9) 0.0019(8) -0.0001(8)
C2_2 0.0244(10) 0.0297(11) 0.0257(10) -0.0015(9) 0.0031(8) 0.0006(8)
S2_2 0.0232(3) 0.0389(3) 0.0253(3) -0.0031(2) 0.0028(2) 0.0024(2)
O4_2 0.0268(9) 0.0648(15) 0.0377(11) -0.0066(10) 0.0077(8) -0.0081(9)
O3_2 0.0401(11) 0.0400(11) 0.0297(9) -0.0034(8) 0.0012(8) 0.0135(8)
C10_2 0.0265(11) 0.0306(12) 0.0224(10) -0.0014(8) 0.0036(8) 0.0018(8)
C15_2 0.0337(13) 0.0308(12) 0.0329(12) 0.0002(10) 0.0098(10) -0.0031(9)
C14_2 0.0364(14) 0.0321(13) 0.0318(12) 0.0054(10) 0.0086(10) 0.0033(10)
C13_2 0.0318(13) 0.0438(15) 0.0254(11) 0.0041(10) 0.0031(9) 0.0060(11)
C16_2 0.0435(17) 0.069(2) 0.0311(14) 0.0091(15) -0.0031(12) 0.0072(16)
C12_2 0.0342(13) 0.0355(13) 0.0263(11) 0.0007(10) 0.0012(9) -0.0029(10)
C11_2 0.0328(12) 0.0299(12) 0.0250(10) 0.0010(9) 0.0049(9) -0.0003(9)
C7_3 0.0550(19) 0.057(2) 0.0310(13) 0.0002(14) 0.0088(13) -0.0030(16)
C2_3 0.0379(14) 0.0423(15) 0.0332(12) -0.0037(11) 0.0120(11) 0.0001(11)
C3_3 0.0465(17) 0.0427(16) 0.0483(17) -0.0025(14) 0.0238(14) -0.0050(13)
C4_3 0.0352(14) 0.0399(15) 0.0563(18) -0.0123(14) 0.0167(13) -0.0077(12)
C5_3 0.0261(11) 0.0381(14) 0.0443(14) -0.0101(12) 0.0037(10) -0.0013(10)
C6_3 0.0259(11) 0.0331(13) 0.0339(12) -0.0049(10) 0.0037(9) 0.0000(9)
C8_3 0.0383(15) 0.0422(16) 0.0358(14) 0.0031(12) 0.0001(12) -0.0001(11)
C1_3 0.0261(11) 0.0326(12) 0.0333(12) -0.0058(10) 0.0067(9) -0.0003(9)
N_3 0.0273(10) 0.0387(12) 0.0300(11) -0.0047(9) 0.0029(8) 0.0009(8)
C_3 0.0260(11) 0.0360(13) 0.0268(11) -0.0033(10) 0.0001(9) -0.0008(9)
C7_4 0.0339(14) 0.0369(15) 0.067(2) 0.0052(15) -0.0037(14) -0.0047(12)
C2_4 0.0290(11) 0.0302(12) 0.0342(12) 0.0020(10) -0.0024(9) 0.0016(9)
C3_4 0.0495(18) 0.0444(16) 0.0328(13) 0.0059(13) -0.0040(12) 0.0060(14)
C4_4 0.067(2) 0.0454(17) 0.0440(17) 0.0151(15) 0.0203(16) 0.0068(17)
C5_4 0.0507(19) 0.0374(16) 0.061(2) 0.0006(15) 0.0258(16) -0.0050(13)
C6_4 0.0319(13) 0.0345(13) 0.0414(15) -0.0084(11) 0.0070(11) -0.0017(10)
C8_4 0.0346(16) 0.053(2) 0.066(2) -0.0268(17) -0.0002(15) -0.0034(13)
C1_4 0.0300(11) 0.0300(12) 0.0259(10) 0.0003(9) 0.0012(9) 0.0047(9)
N_4 0.0369(12) 0.0375(12) 0.0283(10) 0.0006(9) 0.0036(9) 0.0078(9)
C_4 0.0286(12) 0.0366(13) 0.0290(11) -0.0040(10) -0.0002(9) 0.0043(10)
 
_geom_special_details
;
 All esds (except the esd in the dihedral angle between two l.s. planes)
 are estimated using the full covariance matrix.  The cell esds are taken
 into account individually in the estimation of esds in distances, angles
 and torsion angles; correlations between esds in cell parameters are only
 used when they are defined by crystal symmetry.  An approximate (isotropic)
 treatment of cell esds is used for estimating esds involving l.s. planes.
;
 
loop_
 _geom_bond_atom_site_label_1
 _geom_bond_atom_site_label_2
 _geom_bond_distance
 _geom_bond_site_symmetry_2
 _geom_bond_publ_flag
Pt_1 C_3 1.957(3) . ?
Pt_1 C_4 1.962(3) . ?
Pt_1 C2_2 2.057(3) . ?
Pt_1 C1_2 2.073(3) . ?
C8_2 C3_2 1.384(4) . ?
C8_2 C7_2 1.386(4) . ?
C8_2 H8_2 0.9500 . ?
C7_2 C6_2 1.388(5) . ?
C7_2 H7_2 0.9500 . ?
C6_2 C5_2 1.388(5) . ?
C6_2 C9_2 1.500(4) . ?
C9_2 H9A_2 0.9800 . ?
C9_2 H9B_2 0.9800 . ?
C9_2 H9C_2 0.9800 . ?
C5_2 C4_2 1.389(4) . ?
C5_2 H5_2 0.9500 . ?
C4_2 C3_2 1.387(4) . ?
C4_2 H4_2 0.9500 . ?
C3_2 S1_2 1.770(3) . ?
S1_2 O1_2 1.441(2) . ?
S1_2 O2_2 1.441(2) . ?
S1_2 C1_2 1.745(3) . ?
C1_2 C2_2 1.476(4) . ?
C1_2 H1_2 1.0000 . ?
C2_2 S2_2 1.751(3) . ?
C2_2 H2_2 1.0000 . ?
S2_2 O4_2 1.440(2) . ?
S2_2 O3_2 1.441(2) . ?
S2_2 C10_2 1.763(3) . ?
C10_2 C15_2 1.384(4) . ?
C10_2 C11_2 1.397(4) . ?
C15_2 C14_2 1.393(4) . ?
C15_2 H15_2 0.9500 . ?
C14_2 C13_2 1.394(4) . ?
C14_2 H14_2 0.9500 . ?
C13_2 C12_2 1.386(4) . ?
C13_2 C16_2 1.508(4) . ?
C16_2 H16A_2 0.9800 . ?
C16_2 H16B_2 0.9800 . ?
C16_2 H16C_2 0.9800 . ?
C12_2 C11_2 1.387(4) . ?
C12_2 H12_2 0.9500 . ?
C11_2 H11_2 0.9500 . ?
C7_3 C2_3 1.503(5) . ?
C7_3 H7A_3 0.9800 . ?
C7_3 H7B_3 0.9800 . ?
C7_3 H7C_3 0.9800 . ?
C2_3 C3_3 1.389(5) . ?
C2_3 C1_3 1.398(4) . ?
C3_3 C4_3 1.372(5) . ?
C3_3 H3_3 0.9500 . ?
C4_3 C5_3 1.386(5) . ?
C4_3 H4_3 0.9500 . ?
C5_3 C6_3 1.386(4) . ?
C5_3 H5_3 0.9500 . ?
C6_3 C1_3 1.397(4) . ?
C6_3 C8_3 1.502(4) . ?
C8_3 H8A_3 0.9800 . ?
C8_3 H8B_3 0.9800 . ?
C8_3 H8C_3 0.9800 . ?
C1_3 N_3 1.389(4) . ?
N_3 C_3 1.158(4) . ?
C7_4 C2_4 1.501(4) . ?
C7_4 H7A_4 0.9800 . ?
C7_4 H7B_4 0.9800 . ?
C7_4 H7C_4 0.9800 . ?
C2_4 C3_4 1.387(4) . ?
C2_4 C1_4 1.398(4) . ?
C3_4 C4_4 1.386(6) . ?
C3_4 H3_4 0.9500 . ?
C4_4 C5_4 1.377(6) . ?
C4_4 H4_4 0.9500 . ?
C5_4 C6_4 1.384(5) . ?
C5_4 H5_4 0.9500 . ?
C6_4 C1_4 1.392(4) . ?
C6_4 C8_4 1.498(5) . ?
C8_4 H8A_4 0.9800 . ?
C8_4 H8B_4 0.9800 . ?
C8_4 H8C_4 0.9800 . ?
C1_4 N_4 1.396(3) . ?
N_4 C_4 1.149(4) . ?
 
loop_
 _geom_angle_atom_site_label_1
 _geom_angle_atom_site_label_2
 _geom_angle_atom_site_label_3
 _geom_angle
 _geom_angle_site_symmetry_1
 _geom_angle_site_symmetry_3
 _geom_angle_publ_flag
C_3 Pt_1 C_4 98.54(12) . . ?
C_3 Pt_1 C2_2 107.59(11) . . ?
C_4 Pt_1 C2_2 153.86(11) . . ?
C_3 Pt_1 C1_2 149.46(11) . . ?
C_4 Pt_1 C1_2 111.99(11) . . ?
C2_2 Pt_1 C1_2 41.87(10) . . ?
C3_2 C8_2 C7_2 120.6(3) . . ?
C3_2 C8_2 H8_2 119.7 . . ?
C7_2 C8_2 H8_2 119.7 . . ?
C8_2 C7_2 C6_2 120.5(3) . . ?
C8_2 C7_2 H7_2 119.8 . . ?
C6_2 C7_2 H7_2 119.8 . . ?
C7_2 C6_2 C5_2 118.4(3) . . ?
C7_2 C6_2 C9_2 121.5(3) . . ?
C5_2 C6_2 C9_2 120.0(3) . . ?
C6_2 C9_2 H9A_2 109.5 . . ?
C6_2 C9_2 H9B_2 109.5 . . ?
H9A_2 C9_2 H9B_2 109.5 . . ?
C6_2 C9_2 H9C_2 109.5 . . ?
H9A_2 C9_2 H9C_2 109.5 . . ?
H9B_2 C9_2 H9C_2 109.5 . . ?
C6_2 C5_2 C4_2 121.4(3) . . ?
C6_2 C5_2 H5_2 119.3 . . ?
C4_2 C5_2 H5_2 119.3 . . ?
C3_2 C4_2 C5_2 119.5(3) . . ?
C3_2 C4_2 H4_2 120.2 . . ?
C5_2 C4_2 H4_2 120.2 . . ?
C8_2 C3_2 C4_2 119.4(3) . . ?
C8_2 C3_2 S1_2 120.7(2) . . ?
C4_2 C3_2 S1_2 119.8(2) . . ?
O1_2 S1_2 O2_2 119.11(14) . . ?
O1_2 S1_2 C1_2 108.18(14) . . ?
O2_2 S1_2 C1_2 108.70(13) . . ?
O1_2 S1_2 C3_2 107.13(13) . . ?
O2_2 S1_2 C3_2 107.51(13) . . ?
C1_2 S1_2 C3_2 105.39(12) . . ?
C2_2 C1_2 S1_2 118.78(19) . . ?
C2_2 C1_2 Pt_1 68.48(13) . . ?
S1_2 C1_2 Pt_1 115.39(13) . . ?
C2_2 C1_2 H1_2 115.3 . . ?
S1_2 C1_2 H1_2 115.3 . . ?
Pt_1 C1_2 H1_2 115.3 . . ?
C1_2 C2_2 S2_2 117.85(19) . . ?
C1_2 C2_2 Pt_1 69.64(14) . . ?
S2_2 C2_2 Pt_1 114.79(13) . . ?
C1_2 C2_2 H2_2 115.6 . . ?
S2_2 C2_2 H2_2 115.6 . . ?
Pt_1 C2_2 H2_2 115.6 . . ?
O4_2 S2_2 O3_2 119.08(15) . . ?
O4_2 S2_2 C2_2 108.37(14) . . ?
O3_2 S2_2 C2_2 108.67(13) . . ?
O4_2 S2_2 C10_2 107.40(13) . . ?
O3_2 S2_2 C10_2 107.40(13) . . ?
C2_2 S2_2 C10_2 105.05(12) . . ?
C15_2 C10_2 C11_2 120.8(2) . . ?
C15_2 C10_2 S2_2 119.7(2) . . ?
C11_2 C10_2 S2_2 119.5(2) . . ?
C10_2 C15_2 C14_2 119.3(3) . . ?
C10_2 C15_2 H15_2 120.4 . . ?
C14_2 C15_2 H15_2 120.4 . . ?
C15_2 C14_2 C13_2 120.7(3) . . ?
C15_2 C14_2 H14_2 119.7 . . ?
C13_2 C14_2 H14_2 119.7 . . ?
C12_2 C13_2 C14_2 119.1(3) . . ?
C12_2 C13_2 C16_2 121.0(3) . . ?
C14_2 C13_2 C16_2 120.0(3) . . ?
C13_2 C16_2 H16A_2 109.5 . . ?
C13_2 C16_2 H16B_2 109.5 . . ?
H16A_2 C16_2 H16B_2 109.5 . . ?
C13_2 C16_2 H16C_2 109.5 . . ?
H16A_2 C16_2 H16C_2 109.5 . . ?
H16B_2 C16_2 H16C_2 109.5 . . ?
C13_2 C12_2 C11_2 121.1(3) . . ?
C13_2 C12_2 H12_2 119.4 . . ?
C11_2 C12_2 H12_2 119.4 . . ?
C12_2 C11_2 C10_2 119.0(2) . . ?
C12_2 C11_2 H11_2 120.5 . . ?
C10_2 C11_2 H11_2 120.5 . . ?
C2_3 C7_3 H7A_3 109.5 . . ?
C2_3 C7_3 H7B_3 109.5 . . ?
H7A_3 C7_3 H7B_3 109.5 . . ?
C2_3 C7_3 H7C_3 109.5 . . ?
H7A_3 C7_3 H7C_3 109.5 . . ?
H7B_3 C7_3 H7C_3 109.5 . . ?
C3_3 C2_3 C1_3 116.5(3) . . ?
C3_3 C2_3 C7_3 122.0(3) . . ?
C1_3 C2_3 C7_3 121.5(3) . . ?
C4_3 C3_3 C2_3 121.3(3) . . ?
C4_3 C3_3 H3_3 119.4 . . ?
C2_3 C3_3 H3_3 119.4 . . ?
C3_3 C4_3 C5_3 121.0(3) . . ?
C3_3 C4_3 H4_3 119.5 . . ?
C5_3 C4_3 H4_3 119.5 . . ?
C6_3 C5_3 C4_3 120.3(3) . . ?
C6_3 C5_3 H5_3 119.9 . . ?
C4_3 C5_3 H5_3 119.9 . . ?
C5_3 C6_3 C1_3 117.3(3) . . ?
C5_3 C6_3 C8_3 122.0(3) . . ?
C1_3 C6_3 C8_3 120.7(3) . . ?
C6_3 C8_3 H8A_3 109.5 . . ?
C6_3 C8_3 H8B_3 109.5 . . ?
H8A_3 C8_3 H8B_3 109.5 . . ?
C6_3 C8_3 H8C_3 109.5 . . ?
H8A_3 C8_3 H8C_3 109.5 . . ?
H8B_3 C8_3 H8C_3 109.5 . . ?
N_3 C1_3 C6_3 118.1(3) . . ?
N_3 C1_3 C2_3 118.3(3) . . ?
C6_3 C1_3 C2_3 123.6(3) . . ?
C_3 N_3 C1_3 177.2(3) . . ?
N_3 C_3 Pt_1 175.4(3) . . ?
C2_4 C7_4 H7A_4 109.5 . . ?
C2_4 C7_4 H7B_4 109.5 . . ?
H7A_4 C7_4 H7B_4 109.5 . . ?
C2_4 C7_4 H7C_4 109.5 . . ?
H7A_4 C7_4 H7C_4 109.5 . . ?
H7B_4 C7_4 H7C_4 109.5 . . ?
C3_4 C2_4 C1_4 116.8(3) . . ?
C3_4 C2_4 C7_4 121.7(3) . . ?
C1_4 C2_4 C7_4 121.5(3) . . ?
C4_4 C3_4 C2_4 120.5(3) . . ?
C4_4 C3_4 H3_4 119.8 . . ?
C2_4 C3_4 H3_4 119.8 . . ?
C5_4 C4_4 C3_4 120.9(3) . . ?
C5_4 C4_4 H4_4 119.5 . . ?
C3_4 C4_4 H4_4 119.5 . . ?
C4_4 C5_4 C6_4 121.2(3) . . ?
C4_4 C5_4 H5_4 119.4 . . ?
C6_4 C5_4 H5_4 119.4 . . ?
C5_4 C6_4 C1_4 116.5(3) . . ?
C5_4 C6_4 C8_4 121.9(3) . . ?
C1_4 C6_4 C8_4 121.6(3) . . ?
C6_4 C8_4 H8A_4 109.5 . . ?
C6_4 C8_4 H8B_4 109.5 . . ?
H8A_4 C8_4 H8B_4 109.5 . . ?
C6_4 C8_4 H8C_4 109.5 . . ?
H8A_4 C8_4 H8C_4 109.5 . . ?
H8B_4 C8_4 H8C_4 109.5 . . ?
C6_4 C1_4 N_4 117.6(3) . . ?
C6_4 C1_4 C2_4 124.2(3) . . ?
N_4 C1_4 C2_4 118.2(3) . . ?
C_4 N_4 C1_4 178.0(3) . . ?
N_4 C_4 Pt_1 178.3(3) . . ?
 
loop_
 _geom_torsion_atom_site_label_1
 _geom_torsion_atom_site_label_2
 _geom_torsion_atom_site_label_3
 _geom_torsion_atom_site_label_4
 _geom_torsion
 _geom_torsion_site_symmetry_1
 _geom_torsion_site_symmetry_2
 _geom_torsion_site_symmetry_3
 _geom_torsion_site_symmetry_4
 _geom_torsion_publ_flag
C3_2 C8_2 C7_2 C6_2 -2.0(4) . . . . ?
C8_2 C7_2 C6_2 C5_2 -0.3(4) . . . . ?
C8_2 C7_2 C6_2 C9_2 179.9(3) . . . . ?
C7_2 C6_2 C5_2 C4_2 2.2(5) . . . . ?
C9_2 C6_2 C5_2 C4_2 -178.1(3) . . . . ?
C6_2 C5_2 C4_2 C3_2 -1.6(5) . . . . ?
C7_2 C8_2 C3_2 C4_2 2.6(4) . . . . ?
C7_2 C8_2 C3_2 S1_2 -177.8(2) . . . . ?
C5_2 C4_2 C3_2 C8_2 -0.7(4) . . . . ?
C5_2 C4_2 C3_2 S1_2 179.6(2) . . . . ?
C8_2 C3_2 S1_2 O1_2 179.1(2) . . . . ?
C4_2 C3_2 S1_2 O1_2 -1.2(3) . . . . ?
C8_2 C3_2 S1_2 O2_2 -51.7(3) . . . . ?
C4_2 C3_2 S1_2 O2_2 127.9(2) . . . . ?
C8_2 C3_2 S1_2 C1_2 64.1(3) . . . . ?
C4_2 C3_2 S1_2 C1_2 -116.3(2) . . . . ?
O1_2 S1_2 C1_2 C2_2 161.7(2) . . . . ?
O2_2 S1_2 C1_2 C2_2 31.0(2) . . . . ?
C3_2 S1_2 C1_2 C2_2 -84.0(2) . . . . ?
O1_2 S1_2 C1_2 Pt_1 83.36(16) . . . . ?
O2_2 S1_2 C1_2 Pt_1 -47.31(17) . . . . ?
C3_2 S1_2 C1_2 Pt_1 -162.31(14) . . . . ?
S1_2 C1_2 C2_2 S2_2 143.93(15) . . . . ?
Pt_1 C1_2 C2_2 S2_2 -108.05(17) . . . . ?
S1_2 C1_2 C2_2 Pt_1 -108.02(17) . . . . ?
C1_2 C2_2 S2_2 O4_2 161.6(2) . . . . ?
Pt_1 C2_2 S2_2 O4_2 82.53(17) . . . . ?
C1_2 C2_2 S2_2 O3_2 30.9(2) . . . . ?
Pt_1 C2_2 S2_2 O3_2 -48.22(17) . . . . ?
C1_2 C2_2 S2_2 C10_2 -83.8(2) . . . . ?
Pt_1 C2_2 S2_2 C10_2 -162.90(13) . . . . ?
O4_2 S2_2 C10_2 C15_2 24.3(3) . . . . ?
O3_2 S2_2 C10_2 C15_2 153.5(2) . . . . ?
C2_2 S2_2 C10_2 C15_2 -91.0(2) . . . . ?
O4_2 S2_2 C10_2 C11_2 -155.5(2) . . . . ?
O3_2 S2_2 C10_2 C11_2 -26.3(2) . . . . ?
C2_2 S2_2 C10_2 C11_2 89.2(2) . . . . ?
C11_2 C10_2 C15_2 C14_2 0.8(4) . . . . ?
S2_2 C10_2 C15_2 C14_2 -179.0(2) . . . . ?
C10_2 C15_2 C14_2 C13_2 -1.3(4) . . . . ?
C15_2 C14_2 C13_2 C12_2 1.0(4) . . . . ?
C15_2 C14_2 C13_2 C16_2 -178.8(3) . . . . ?
C14_2 C13_2 C12_2 C11_2 -0.2(4) . . . . ?
C16_2 C13_2 C12_2 C11_2 179.6(3) . . . . ?
C13_2 C12_2 C11_2 C10_2 -0.3(4) . . . . ?
C15_2 C10_2 C11_2 C12_2 0.0(4) . . . . ?
S2_2 C10_2 C11_2 C12_2 179.8(2) . . . . ?
C1_3 C2_3 C3_3 C4_3 0.5(5) . . . . ?
C7_3 C2_3 C3_3 C4_3 -179.1(3) . . . . ?
C2_3 C3_3 C4_3 C5_3 0.4(5) . . . . ?
C3_3 C4_3 C5_3 C6_3 -1.0(5) . . . . ?
C4_3 C5_3 C6_3 C1_3 0.5(4) . . . . ?
C4_3 C5_3 C6_3 C8_3 179.6(3) . . . . ?
C5_3 C6_3 C1_3 N_3 179.3(2) . . . . ?
C8_3 C6_3 C1_3 N_3 0.3(4) . . . . ?
C5_3 C6_3 C1_3 C2_3 0.4(4) . . . . ?
C8_3 C6_3 C1_3 C2_3 -178.6(3) . . . . ?
C3_3 C2_3 C1_3 N_3 -179.8(3) . . . . ?
C7_3 C2_3 C1_3 N_3 -0.2(4) . . . . ?
C3_3 C2_3 C1_3 C6_3 -0.9(4) . . . . ?
C7_3 C2_3 C1_3 C6_3 178.7(3) . . . . ?
C1_4 C2_4 C3_4 C4_4 -0.1(5) . . . . ?
C7_4 C2_4 C3_4 C4_4 179.1(3) . . . . ?
C2_4 C3_4 C4_4 C5_4 -0.3(6) . . . . ?
C3_4 C4_4 C5_4 C6_4 0.3(6) . . . . ?
C4_4 C5_4 C6_4 C1_4 -0.1(5) . . . . ?
C4_4 C5_4 C6_4 C8_4 -178.6(3) . . . . ?
C5_4 C6_4 C1_4 N_4 -178.9(3) . . . . ?
C8_4 C6_4 C1_4 N_4 -0.3(4) . . . . ?
C5_4 C6_4 C1_4 C2_4 -0.3(4) . . . . ?
C8_4 C6_4 C1_4 C2_4 178.3(3) . . . . ?
C3_4 C2_4 C1_4 C6_4 0.3(4) . . . . ?
C7_4 C2_4 C1_4 C6_4 -178.8(3) . . . . ?
C3_4 C2_4 C1_4 N_4 179.0(3) . . . . ?
C7_4 C2_4 C1_4 N_4 -0.2(4) . . . . ?
 
_refine_diff_density_max    2.260
_refine_diff_density_min   -2.387
_refine_diff_density_rms    0.107

_shelx_res_file
;
TITL X4ESxT-21May163350_a.res in P2(1)/c
    PFV45_XDS_correct-sx.res
    created by SHELXL-2019/3 at 13:27:42 on 13-Aug-2023

REM Old TITL X4ESxT-21May163350 in P2(1)/c
REM SHELXT solution in P2(1)/c: R1 0.103, Rweak 0.003, Alpha 0.058
REM <I/s>   2.852 for  410 systematic absences,  Orientation as input
REM Formula found by SHELXT:  C32 N4 O4 S2 Pd
CELL 0.62000  15.49600   9.01000  23.06700  90.0000 101.5640  90.0000
ZERR    4.00   0.00310   0.00180   0.00461   0.0000   0.0300   0.0000

LATT  1
SYMM -X, 1/2+Y, 1/2-Z
SFAC  C  N  O  S  Pt H
DISP    Pt   -0.84788    6.75574     24349.60
DISP    H     0.00000    0.00000         0.66
DISP    N     0.00416    0.00245        14.28
DISP    C     0.00201    0.00119         8.75
DISP    O     0.00771    0.00451        22.87
DISP    S     0.09937    0.09447       352.74
UNIT 136 8 16 8 4 136
L.S. 10
LIST 4
BOND $H
CONF
MERG 2
FMAP 2
rem PLAN   25
SHEL 180 0.68
ACTA
WPDB -2
TEMP -173.15
SIZE 0.1 0.05 0.02
rem HFIX_PNC 43  C3 C4 C5
rem HFIX_PNC 137 C8 C7
REM HFIX_TOE 43 C11 C12 C14 C15 C4 C8 C5 C7
REM HFIX_TOE 13 C1 C2
REM HFIX_TOE 137 C9 C16

PLAN 20

rem delu 0.01 Pt_1 N_4

REM Omit extracted on Fri Aug 11 10:58:00 2023
omit -6 1 2
omit 4 0 6
omit -3 1 6
omit -7 2 2
omit 4 0 4
omit 4 2 3
omit 6 3 0
omit -9 11 13

REM Omit extracted on Fri Aug 11 11:10:11 2023
omit 2 0 2
omit -5 1 3
omit -4 5 27
omit 5 0 6
omit -7 2 3
omit -1 0 22
omit 11 0 12
omit 6 1 7
omit 9 0 8
omit 8 1 0
omit 5 1 3
omit 17 0 16
omit -5 3 8

REM Omit extracted on Fri Aug 11 11:15:23 2023
omit 5 1 6
omit 16 0 16
omit -2 1 7
omit 1 4 3

REM Omit extracted on Fri Aug 11 11:17:02 2023
omit 4 3 2
omit 8 3 3
omit -13 4 5
omit 1 0 2
omit 1 2 9
omit -3 2 10
omit -4 4 3
omit 6 1 1

REM Omit extracted on Fri Aug 11 11:32:59 2023
omit -8 3 2
omit 0 3 4
omit -3 2 2
omit 1 4 2
omit 1 2 3
omit -3 0 4
omit 6 10 9
omit 2 1 3
omit 6 3 1
omit 1 4 6
omit 14 2 20
omit 0 0 2
omit 5 3 3

WGHT    0.039900    2.275100
FVAR       2.33617
RESI 1 Pt
PT    5    0.689947    0.324146    0.588248    11.00000    0.02297    0.03106 =
         0.02317   -0.00138   -0.00068    0.00086

RESI 2 TOE
C8    1    0.977688    0.196204    0.735008    11.00000    0.01907    0.04091 =
         0.03238    0.00340    0.00062   -0.00031
AFIX  43
H8    6    0.926769    0.136703    0.733889    11.00000   -1.20000
AFIX   0
C7    1    1.042912    0.199223    0.785795    11.00000    0.03247    0.03926 =
         0.03137   -0.00061    0.00137    0.00851
AFIX  43
H7    6    1.035484    0.144348    0.819620    11.00000   -1.20000
AFIX   0
C6    1    1.118991    0.281789    0.787619    11.00000    0.03169    0.03389 =
         0.03841   -0.01048   -0.00649    0.00646
C9    1    1.190504    0.287022    0.842053    11.00000    0.04593    0.04350 =
         0.05078   -0.01497   -0.01780    0.00708
AFIX 137
H9A   6    1.168531    0.245368    0.875578    11.00000   -1.50000
H9B   6    1.208594    0.390217    0.850693    11.00000   -1.50000
H9C   6    1.241121    0.228901    0.835459    11.00000   -1.50000
AFIX   0
C5    1    1.128152    0.360153    0.737403    11.00000    0.02980    0.03755 =
         0.05124   -0.00943    0.00134   -0.00443
AFIX  43
H5    6    1.180792    0.414350    0.737584    11.00000   -1.20000
AFIX   0
C4    1    1.062030    0.361045    0.686902    11.00000    0.02939    0.03741 =
         0.04091   -0.00286    0.00685   -0.00392
AFIX  43
H4    6    1.068825    0.417408    0.653299    11.00000   -1.20000
AFIX   0
C3    1    0.986003    0.279042    0.685886    11.00000    0.02280    0.03212 =
         0.02892   -0.00370    0.00390    0.00051
S1    4    0.901086    0.280439    0.621869    11.00000    0.02408    0.03435 =
         0.02491   -0.00216    0.00348    0.00034
O1    3    0.929044    0.377833    0.579613    11.00000    0.03778    0.05382 =
         0.03163    0.00570    0.01010   -0.00186
O2    3    0.880136    0.128239    0.605657    11.00000    0.03033    0.03731 =
         0.03667   -0.01107    0.00051    0.00295
C1    1    0.810600    0.361261    0.644011    11.00000    0.02329    0.02876 =
         0.02552   -0.00051    0.00191   -0.00010
AFIX  13
H1    6    0.820165    0.464347    0.660079    11.00000   -1.20000
AFIX   0
C2    1    0.753135    0.266943    0.672415    11.00000    0.02442    0.02967 =
         0.02566   -0.00150    0.00308    0.00064
AFIX  13
H2    6    0.771243    0.160551    0.678078    11.00000   -1.20000
AFIX   0
S2    4    0.708061    0.345095    0.729180    11.00000    0.02325    0.03893 =
         0.02531   -0.00314    0.00279    0.00244
O4    3    0.634326    0.255580    0.737085    11.00000    0.02677    0.06481 =
         0.03773   -0.00663    0.00771   -0.00808
O3    3    0.695117    0.501590    0.717864    11.00000    0.04005    0.04003 =
         0.02966   -0.00342    0.00122    0.01354
C10   1    0.790620    0.326048    0.793546    11.00000    0.02650    0.03057 =
         0.02242   -0.00142    0.00364    0.00182
C15   1    0.792355    0.200701    0.828457    11.00000    0.03367    0.03078 =
         0.03292    0.00016    0.00979   -0.00313
AFIX  43
H15   6    0.749905    0.124362    0.817597    11.00000   -1.20000
AFIX   0
C14   1    0.857037    0.187762    0.879684    11.00000    0.03639    0.03207 =
         0.03184    0.00541    0.00858    0.00330
AFIX  43
H14   6    0.857860    0.102934    0.904249    11.00000   -1.20000
AFIX   0
C13   1    0.920571    0.297957    0.895288    11.00000    0.03182    0.04384 =
         0.02536    0.00408    0.00308    0.00597
C16   1    0.991161    0.280657    0.950278    11.00000    0.04348    0.06870 =
         0.03110    0.00907   -0.00315    0.00719
AFIX 137
H16A  6    0.963995    0.253265    0.983645    11.00000   -1.50000
H16B  6    1.022924    0.374658    0.959010    11.00000   -1.50000
H16C  6    1.032443    0.202804    0.943920    11.00000   -1.50000
AFIX   0
C12   1    0.917811    0.422298    0.859551    11.00000    0.03425    0.03555 =
         0.02632    0.00067    0.00120   -0.00295
AFIX  43
H12   6    0.960820    0.497930    0.870054    11.00000   -1.20000
AFIX   0
C11   1    0.853338    0.438133    0.808737    11.00000    0.03283    0.02993 =
         0.02504    0.00098    0.00486   -0.00026
AFIX  43
H11   6    0.851850    0.523934    0.784620    11.00000   -1.20000
AFIX   0

RESI  3 PNC
C7    1    0.477203   -0.013817    0.661640    11.00000    0.05505    0.05703 =
         0.03096    0.00020    0.00876   -0.00302
AFIX 137
H7A   6    0.448768   -0.062641    0.690841    11.00000   -1.50000
H7B   6    0.495510    0.086450    0.675328    11.00000   -1.50000
H7C   6    0.528963   -0.071269    0.656740    11.00000   -1.50000
AFIX   0
C2    1    0.413368   -0.004604    0.603388    11.00000    0.03791    0.04231 =
         0.03321   -0.00375    0.01196    0.00014
C3    1    0.335395   -0.085247    0.592145    11.00000    0.04649    0.04272 =
         0.04826   -0.00246    0.02379   -0.00499
AFIX  43
H3    6    0.321274   -0.147221    0.622240    11.00000   -1.20000
AFIX   0
C4    1    0.278368   -0.077155    0.538426    11.00000    0.03521    0.03995 =
         0.05628   -0.01231    0.01669   -0.00769
AFIX  43
H4    6    0.225300   -0.132992    0.532058    11.00000   -1.20000
AFIX   0
C5    1    0.297004    0.011246    0.493304    11.00000    0.02606    0.03806 =
         0.04428   -0.01006    0.00374   -0.00133
AFIX  43
H5    6    0.257188    0.014305    0.456193    11.00000   -1.20000
AFIX   0
C6    1    0.373486    0.095203    0.502101    11.00000    0.02595    0.03311 =
         0.03389   -0.00488    0.00365    0.00003
C8    1    0.396471    0.191577    0.454266    11.00000    0.03828    0.04221 =
         0.03577    0.00308    0.00008   -0.00006
AFIX 137
H8A   6    0.395506    0.296011    0.465992    11.00000   -1.50000
H8B   6    0.353448    0.175805    0.417403    11.00000   -1.50000
H8C   6    0.455456    0.165794    0.448190    11.00000   -1.50000
AFIX   0
C1    1    0.429891    0.085253    0.557394    11.00000    0.02612    0.03264 =
         0.03331   -0.00583    0.00669   -0.00029
N     2    0.507336    0.167335    0.566816    11.00000    0.02733    0.03875 =
         0.02997   -0.00474    0.00288    0.00092
C     1    0.573507    0.231008    0.573728    11.00000    0.02604    0.03601 =
         0.02675   -0.00326    0.00011   -0.00084

RESI  4 PNC
C7    1    0.522579    0.437715    0.378233    11.00000    0.03395    0.03686 =
         0.06717    0.00524   -0.00371   -0.00469
AFIX 137
H7A   6    0.471307    0.452648    0.346183    11.00000   -1.50000
H7B   6    0.506223    0.458699    0.416303    11.00000   -1.50000
H7C   6    0.542733    0.334711    0.377741    11.00000   -1.50000
AFIX   0
C2    1    0.595272    0.540446    0.369766    11.00000    0.02904    0.03023 =
         0.03420    0.00203   -0.00237    0.00156
C3    1    0.590688    0.621514    0.318115    11.00000    0.04948    0.04443 =
         0.03278    0.00593   -0.00396    0.00597
AFIX  43
H3    6    0.540849    0.611437    0.286812    11.00000   -1.20000
AFIX   0
C4    1    0.658273    0.717081    0.311845    11.00000    0.06721    0.04536 =
         0.04398    0.01508    0.02027    0.00681
AFIX  43
H4    6    0.654337    0.771589    0.276156    11.00000   -1.20000
AFIX   0
C5    1    0.731077    0.734133    0.356642    11.00000    0.05072    0.03737 =
         0.06141    0.00057    0.02582   -0.00495
AFIX  43
H5    6    0.776458    0.800670    0.351412    11.00000   -1.20000
AFIX   0
C6    1    0.739315    0.656058    0.409152    11.00000    0.03186    0.03455 =
         0.04138   -0.00835    0.00702   -0.00170
C8    1    0.817116    0.675727    0.458854    11.00000    0.03463    0.05291 =
         0.06639   -0.02680   -0.00019   -0.00344
AFIX 137
H8A   6    0.863461    0.730216    0.444561    11.00000   -1.50000
H8B   6    0.839494    0.578191    0.473556    11.00000   -1.50000
H8C   6    0.799280    0.731639    0.490951    11.00000   -1.50000
AFIX   0
C1    1    0.670476    0.560524    0.413990    11.00000    0.02999    0.03001 =
         0.02588    0.00030    0.00124    0.00466
N     2    0.676485    0.482446    0.466926    11.00000    0.03692    0.03753 =
         0.02826    0.00061    0.00363    0.00781
C     1    0.681889    0.421967    0.511354    11.00000    0.02859    0.03662 =
         0.02898   -0.00395   -0.00019    0.00428

HKLF 4


REM  X4ESxT-21May163350_a.res in P2(1)/c
REM wR2 = 0.0767, GooF = S = 1.105, Restrained GooF = 1.105 for all data
REM R1 = 0.0289 for 9184 Fo > 4sig(Fo) and 0.0337 for all 10435 data
REM 394 parameters refined using 0 restraints

END

WGHT      0.0406      2.2967

REM Highest difference peak  2.260,  deepest hole -2.387,  1-sigma level  0.107
Q1    1   0.7121  0.3869  0.5699  11.00000  0.05    2.26
Q2    1   0.6664  0.2583  0.6079  11.00000  0.05    2.03
Q3    1   0.6551  0.3250  0.5619  11.00000  0.05    1.76
Q4    1   0.7260  0.3229  0.6137  11.00000  0.05    1.60
Q5    1   0.6683  0.3879  0.6028  11.00000  0.05    1.35
Q6    1   0.7134  0.2603  0.5698  11.00000  0.05    1.31
Q7    1   0.6448  0.3212  0.6192  11.00000  0.05    1.18
Q8    1   0.3081 -0.0323  0.4098  11.00000  0.05    0.84
Q9    1   0.9338  0.1792  0.7346  11.00000  0.05    0.84
Q10   1   0.6334  0.2444  0.5720  11.00000  0.05    0.76
Q11   1   0.7320  0.2242  0.6018  11.00000  0.05    0.73
Q12   1   0.6224  0.2589  0.5866  11.00000  0.05    0.70
Q13   1   0.7087  0.2023  0.5920  11.00000  0.05    0.66
Q14   1   0.4045  0.1002  0.5287  11.00000  0.05    0.62
Q15   1   0.9429  0.2770  0.6513  11.00000  0.05    0.61
Q16   1   0.7391  0.4251  0.6046  11.00000  0.05    0.57
Q17   1   0.6316  0.5499  0.3890  11.00000  0.05    0.56
Q18   1   0.7471  0.3338  0.7595  11.00000  0.05    0.56
Q19   1   0.7673  0.3600  0.5855  11.00000  0.05    0.51
Q20   1   0.6601  0.4431  0.5791  11.00000  0.05    0.49
;
_shelx_res_checksum   37649

_shelx_hkl_file
;
   0   0   1  244.69  26.463   1
   0   0  -1  259.14  26.065   1
   0   0  -1  270.82  27.615   1
   0   0   2  21288. 701.088   1
   0   0   2  23669. 767.930   1
   0   0  -2  23466. 761.171   1
   0   0  -2  22940. 749.154  -1
   0   0   3   60.27  62.073   1
   0   0   3  106.12  54.074   1
   0   0  -3  103.87  56.065   1
   0   0  -3  102.52  57.829   1
   0   0   4 304844. 9485.53   1
   0   0  -4 329027.  10225.   1
   0   0   5  177.28  93.278   1
   0   0   5  281.00 108.261   1
   0   0  -5  165.11  95.193   1
   0   0  -5  195.91  90.011   1
   0   0   6 539992.  16774.   1
   0   0  -6 524971.  16309.   1
   0   0  -6 533608.  16564.   1
   0   0   7  312.95 107.811  -1
   0   0   7  209.99 114.983   1
   0   0  -7  329.52 125.084   1
   0   0  -7  476.15 133.571   1
   0   0   9  -53.21 129.628   1
   0   0   9  -71.84 104.393   1
   0   0  -9  -43.00 138.040   1
   0   0  -9  135.07 139.654   1
   0   0  10 206158. 6503.94   1
   0   0  10 202103. 6436.34   1
   0   0 -10 204018. 6481.41   1
   0   0 -10 201952. 6428.83   1
   0   0  11   32.65 168.043   1
   0   0  11   85.54 127.826   1
   0   0 -11  133.57 189.147   1
   0   0 -11   23.57 161.998   1
   0   0  12 160195. 5170.85   1
   0   0  12 155877. 4983.10  -1
   0   0 -12 167893. 5411.19   1
   0   0 -12 161772. 5238.45  -1
   0   0  13  -94.86 126.699   1
   0   0  13  198.39 193.165   1
   0   0 -13  -25.84 170.409   1
   0   0 -13   18.11 223.094   1
   0   0  14  631.99 229.816   1
   0   0 -14 1140.44 276.755   1
   0   0 -14 1009.76 276.492   1
   0   0  15  138.53 209.238   1
   0   0  15  -53.29 139.129   1
   0   0 -15  160.31 215.133   1
   0   0 -15  -13.25 236.387   1
   0   0  16  96170. 3277.50   1
   0   0  16  97221. 3210.66   1
   0   0 -16  98047. 3327.07   1
   0   0 -16  99024. 3392.41   1
   0   0  17   37.45 148.479   1
   0   0  17   -8.38 251.070   1
   0   0 -17   22.50 231.618   1
   0   0 -17 -127.30 221.930   1
   0   0  18  51671. 1814.87   1
   0   0 -18  49305. 1891.85   1
   0   0  19  168.31 163.349   1
   0   0  19 -298.08 264.138   1
   0   0 -19  161.06 272.549   1
   0   0 -19  -71.99 261.735  -1
   0   0  20 1846.79 227.788   1
   0   0  20 1764.17 373.826   1
   0   0 -20 2076.60 381.149   1
   0   0  21  632.37 321.554   1
   0   0  21   14.71 143.034   1
   0   0 -21  206.31 303.154   1
   0   0 -21 -282.13 318.663   1
   0   0  22 111678. 3679.68   1
   0   0  22 109726. 3777.69   1
   0   0 -22 111904. 3882.84   1
   0   0 -22 110965. 3897.86  -1
   0   0  24  31555. 1409.69   1
   0   0  24  31585. 1209.54   1
   0   0 -24  30710. 1438.60   1
   0   0 -24  32208. 1451.37   1
   0   0  25  -96.21 146.977   1
   0   0  25 -133.83 347.803   1
   0   0 -25    9.96 356.477   1
   0   0 -25  205.44 356.290   1
   0   0  26  113.78 162.336   1
   0   0 -26 -126.25 383.777   1
   0   0  27  -28.39 155.802   1
   0   0  27 -269.28 369.282   1
   0   0 -27  163.35 372.362   1
   0   0 -27  370.97 391.288   1
   0   0  28  40819. 1504.32   1
   0   0  28  38828. 1676.30   1
   0   0 -28  43184. 1910.25   1
   0   0 -28  36955. 1723.62   1
   0   0  29   79.01 377.018   1
   0   0  29   85.92 155.651   1
   0   0 -29  153.40 438.227   1
   0   0 -29 -117.35 445.737   1
   0   0  30 8021.02 717.236   1
   0   0 -30 9387.90 881.336   1
   0   0  31  -62.75 170.071   1
   0   0  31 -112.58 438.978   1
   0   0 -31  485.54 527.600   1
   0   0 -31 -278.75 511.828   1
   0   0  32 3040.18 589.185   1
   0   0 -32 2898.98 664.288   1
   0   0 -32 2017.27 640.630   1
   0   0  33  208.19 462.260   1
   0   0  33   26.25 183.102   1
   0   0 -33  164.63 539.241   1
   0   0 -33 -321.93 517.837   1
   0   0  34  18979. 1140.82   1
   0   0  34  20852. 923.769   1
   0   0 -34  17845. 1334.96   1
   0   0  35   91.18 226.248   1
   0   0  35   32.80 399.173   1
   0   0 -35 -123.36 565.903   1
   0   0 -35 -413.07 560.270   1
   0   0  36 1293.28 307.172   1
   0   0  36 1092.00 450.244   1
   0   0 -36  713.86 581.299   1
   0   0  37 -835.15 356.815   1
   0   0  37 -251.30 367.593   1
   0   0 -37 -407.43 430.717   1
   0  -1   0  294.63  50.732   1
   0  -1   0  197.90  38.979   1
   0   1   0  317.91  49.831   1
   0   1   0  234.55  41.607   1
   0  -1   1  63312. 1976.34   1
   0  -1   1  58994. 1841.15   1
   0  -1  -1  60984. 1936.91   1
   0  -1  -1  64626. 2055.95   1
   0   1   1  63875. 2032.29   1
   0   1   1  58543. 1856.18   1
   0   1  -1  61510. 1922.27   1
   0   1  -1  58243. 1817.50   1
   0  -1   2 716484.  22238.   1
   0  -1   2 657153.  20402.   1
   0   1   2 706721.  21878.   1
   0  -1   3  39429. 1236.95   1
   0  -1   3  38190. 1200.90   1
   0  -1  -3  37890. 1276.38   1
   0  -1  -3  36305. 1223.43   1
   0   1   3  35430. 1174.99   1
   0   1   3  35715. 1219.68   1
   0   1  -3  38678. 1218.17   1
   0   1  -3  39429. 1235.45   1
   0  -1   4 195156. 6060.83   1
   0  -1   4 201201. 6248.59   1
   0  -1  -4 195005. 6132.18   1
   0  -1  -4 197446. 6199.77   1
   0   1   4 192076. 6023.28   1
   0   1  -4 198348. 6165.97  -1
   0   1  -4 196695. 6102.13   1
   0  -1   5  48028. 1540.37   1
   0  -1   5  50469. 1615.85   1
   0  -1  -5  49380. 1652.27   1
   0  -1  -5  47578. 1609.84   1
   0   1   5  49343. 1679.31   1
   0   1   5  46752. 1558.02   1
   0   1  -5  49155. 1582.05  -1
   0   1  -5  52159. 1662.41   1
   0  -1   6  10293. 400.300   1
   0  -1  -6  10071. 463.762   1
   0   1   6  10383. 446.488   1
   0   1  -6 9534.35 366.466   1
   0  -1   7  81449. 2607.21   1
   0  -1   7  79684. 2556.51   1
   0  -1  -7  80586. 2665.79   1
   0  -1  -7  81712. 2689.45   1
   0   1   7  80773. 2676.30   1
   0   1   7  79196. 2586.55   1
   0   1  -7  81975. 2615.47   1
   0   1  -7  75441. 2432.59   1
   0  -1   8 439729.  13680.   1
   0  -1  -8 424333.  13271.   1
   0  -1  -8 423206.  13244.   1
   0   1   8 430717.  13481.   1
   0   1   8 423582.  13207.   1
   0   1  -8 423206.  13181.   1
   0   1  -8 425835.  13241.   1
   0  -1   9  29440. 1047.69   1
   0  -1   9  30864. 1063.09  -1
   0  -1  -9  28201. 1088.25   1
   0  -1  -9  28453. 1096.13   1
   0   1   9  29241. 1119.79   1
   0   1   9  29951. 1085.99   1
   0   1  -9  29455. 1057.45   1
   0   1  -9  28847. 1020.28   1
   0  -1  10 101427. 3249.34   1
   0  -1 -10 102929. 3414.94  -1
   0  -1 -10 106008. 3495.30   1
   0   1  10  98460. 3215.17   1
   0   1  10 102028. 3381.15   1
   0   1 -10 104581. 3394.29   1
   0  -1  11  17931. 684.941   1
   0  -1  11  18130. 731.130   1
   0  -1 -11  19118. 839.278   1
   0  -1 -11  17664. 783.326   1
   0   1  11  18382. 752.159   1
   0   1  11  17893. 793.465   1
   0   1 -11  18363. 747.277   1
   0   1 -11  18900. 800.600   1
   0  -1  12 5212.16 295.456   1
   0  -1  12 5050.69 340.593   1
   0  -1 -12 5520.08 413.819   1
   0  -1 -12 5260.98 422.455   1
   0   1  12 5227.18 395.418   1
   0   1 -12 4814.11 336.425   1
   0   1 -12 5407.43 344.010   1
   0  -1  13  25287. 938.414   1
   0  -1  13  27199. 1055.20   1
   0  -1 -13  29080. 1176.87   1
   0  -1 -13  27845. 1152.83   1
   0   1  13  27108. 1119.04   1
   0   1  13  25971. 1002.63   1
   0   1 -13  27184. 1068.34   1
   0   1 -13  28475. 1077.36   1
   0  -1 -14 213293. 6894.47   1
   0  -1 -14 216297. 6992.11   1
   0   1  14 223056. 7101.01   1
   0   1  14 218813. 7059.70   1
   0   1 -14 211078. 6725.49   1
   0   1 -14 217949. 6977.09   1
   0  -1  15  14461. 619.601   1
   0  -1  15  13259. 650.018   1
   0  -1 -15  14164. 762.297   1
   0  -1 -15  13793. 757.040   1
   0   1  15  14596. 656.777   1
   0   1  15  12486. 687.945   1
   0   1 -15  13609. 659.031   1
   0   1 -15  13740. 684.941  -1
   0  -1  16  19737. 862.185   1
   0   1  16  19185. 808.861   1
   0   1 -16  19347. 853.923   1
   0  -1  17  28922. 1081.11   1
   0  -1  17  29955. 1199.02   1
   0  -1 -17  31412. 1337.59  -1
   0  -1 -17  28502. 1253.47   1
   0   1  17  28840. 1111.15   1
   0   1  17  26496. 1162.60   1
   0   1 -17  29377. 1185.13   1
   0   1 -17  29091. 1223.43   1
   0  -1  18 3339.84 364.100   1
   0  -1  18 3318.43 278.107   1
   0  -1 -18 2624.11 382.275   1
   0  -1 -18 2834.77 399.549   1
   0   1  18 3117.16 291.100   1
   0   1  18 3149.83 409.688   1
   0   1 -18 2883.96 349.793   1
   0   1 -18 2690.57 363.124   1
   0  -1  19  33763. 1357.11   1
   0  -1  19  35445. 1300.79   1
   0  -1 -19  34348. 1467.89   1
   0  -1 -19  33766. 1438.23   1
   0   1  19  35227. 1484.79   1
   0   1  19  35099. 1331.58  -1
   0   1 -19  34675. 1425.08   1
   0   1 -19  34724. 1383.78   1
   0  -1  20 134322. 4352.23   1
   0  -1 -20 127488. 4378.52  -1
   0  -1 -20 126286. 4314.68   1
   0   1  20 130079. 4412.31   1
   0   1  20 127413. 4171.98   1
   0   1 -20 127826. 4325.94   1
   0  -1  21 1503.94 362.373  -1
   0  -1  21 1574.91 212.617   1
   0  -1 -21 1996.62 404.055   1
   0  -1 -21 1403.68 389.035   1
   0   1  21 1390.16 387.157   1
   0   1  21 1684.94 240.255  -1
   0   1 -21 1188.13 327.825   1
   0   1 -21 1353.36 348.667   1
   0  -1  22 4333.45 487.795   1
   0  -1  22 4183.25 318.513   1
   0  -1 -22 4570.03 538.114   1
   0  -1 -22 4851.67 553.511   1
   0   1  22 4502.44 344.123   1
   0   1  22 4570.03 503.942   1
   0   1 -22 5024.40 496.057   1
   0   1 -22 4494.93 503.567   1
   0  -1  23  27244. 1229.81   1
   0  -1  23  26489. 1037.55   1
   0  -1 -23  26448. 1297.03   1
   0  -1 -23  26639. 1292.53   1
   0   1  23  25479. 1215.92   1
   0   1  23  25749. 1033.80   1
   0   1 -23  25115. 1207.66   1
   0   1 -23  26639. 1213.67   1
   0  -1  24  11220. 731.881   1
   0  -1  24  13436. 622.230  -1
   0  -1 -24  11175. 802.478   1
   0   1  24  12283. 607.960   1
   0   1 -24  11495. 770.183   1
   0   1 -24  11964. 819.000   1
   0  -1  25  961.32 384.153   1
   0  -1 -25 1028.54 456.252   1
   0  -1 -25 1004.51 388.659   1
   0   1  25  950.43 200.563   1
   0   1  25 1313.93 415.696  -1
   0   1 -25  762.67 387.157   1
   0  -1  26  30755. 1177.62   1
   0  -1  26  30252. 1346.98   1
   0  -1 -26  31314. 1501.69   1
   0  -1 -26  32906. 1553.13   1
   0   1  26  31228. 1426.96   1
   0   1  26  31066. 1200.90   1
   0   1 -26  33917. 1568.91   1
   0   1 -26  32670. 1486.29   1
   0  -1  27 2336.46 446.488   1
   0  -1  27 2580.92 280.473   1
   0  -1 -27 2303.42 523.094   1
   0  -1 -27 2205.78 505.069   1
   0   1  27 2442.36 275.366   1
   0   1  27 2416.82 475.779   1
   0   1 -27 2369.51 506.571   1
   0   1 -27 2421.70 506.947   1
   0  -1  28 3698.46 319.639   1
   0  -1  28 3894.10 568.907   1
   0  -1 -28 3991.73 618.475   1
   0   1  28 3341.34 548.253   1
   0   1 -28 2923.39 562.523   1
   0  -1  29  11859. 593.315   1
   0  -1  29  11742. 826.886   1
   0  -1 -29  10128. 865.564   1
   0  -1 -29 9846.03 883.589   1
   0   1  29  11280. 578.295   1
   0   1  29  11679. 842.658   1
   0  -1  30  20372. 870.070   1
   0  -1  30  20890. 1138.19   1
   0  -1 -30  19347. 1229.81   1
   0   1  30  20207. 858.805   1
   0   1 -30  16857. 1112.28   1
   0   1 -30  18333. 1227.94   1
   0  -1  31  277.09 477.656   1
   0  -1  31 -154.79 183.102   1
   0  -1 -31   35.70 492.301   1
   0  -1 -31  463.76 488.546   1
   0   1  31   76.27 422.831   1
   0   1  31   70.93 167.067   1
   0   1 -31  -37.45 541.494   1
   0   1 -31  244.27 492.677   1
   0  -1  32  11603. 881.711   1
   0  -1  32  11536. 606.834   1
   0  -1 -32 9102.51 954.562   1
   0  -1 -32  10379. 971.460   1
   0   1  32  11033. 837.025   1
   0   1  32  10702. 567.405   1
   0   1 -32 9549.37 938.790  -1
   0   1 -32 8415.31 1024.78  -1
   0  -1  33 3754.78 368.381   1
   0  -1  33 2604.95 599.323   1
   0  -1 -33 1683.44 626.736  -1
   0   1 -33 2951.56 714.607  -1
   0   1 -33 2989.86 677.431   1
   0  -1  34   38.57 501.689   1
   0  -1  34   -1.95 212.993   1
   0  -1 -34 -154.45 570.784   1
   0   1  34 -399.92 441.982   1
   0   1  34  114.91 199.023  -1
   0   1 -34  422.83 613.593   1
   0   1 -34 -246.23 654.900   1
   0  -1  35 2502.81 344.160   1
   0  -1  35 1725.87 502.440  -1
   0  -1 -35 2432.97 654.900   1
   0   1  35 2240.70 514.081   1
   0   1  35 2602.70 327.074   1
   0   1 -35 1785.95 708.223   1
   0   1 -35 1324.82 642.883   1
   0  -1  36 7630.48 696.958   1
   0  -1 -36 8441.60 898.985   1
   0   1  36 8077.35 680.810   1
   0   1 -36 6068.34 915.508   1
   0   1 -36 6545.24 846.413   1
   0  -1 -37  145.70 422.080   1
   0   1  37  497.93 364.739   1
   0   1  37   45.36 345.249   1
   0  -2   0 587682.  18209.   1
   0  -2   0 601952.  18629.   1
   0   2   0 602703.  18656.   1
   0   2   0 592940.  18378.   1
   0  -2   1 503191.  15576.   1
   0  -2  -1 524596.  16286.   1
   0  -2  -1 511828.  15869.   1
   0   2   1 518588.  16072.   1
   0   2   1 516710.  16042.   1
   0   2  -1 539992.  16729.   1
   0  -2   2  13785. 470.522   1
   0  -2   2  14390. 483.665  -1
   0  -2  -2  15727. 588.434   1
   0  -2  -2  15621. 608.336   1
   0   2   2  16429. 609.838   1
   0   2   2  15708. 612.467   1
   0   2  -2  15013. 502.065   1
   0   2  -2  14465. 499.061   1
   0  -2   3 254525. 7897.10   1
   0  -2   3 238716. 7408.93  -1
   0  -2  -3 257754. 8088.61   1
   0   2   3 266954. 8381.52   1
   0   2   3 265002. 8291.39   1
   0   2  -3 259707. 8054.82   1
   0   2  -3 266316. 8268.86   1
   0  -2   4  74840. 2342.47   1
   0  -2   4  75779. 2369.88   1
   0  -2  -4  78107. 2567.40   1
   0   2   4  76418. 2487.04   1
   0   2  -4  75141. 2355.24   1
   0   2  -4  74052. 2318.44   1
   0  -2   5  61322. 1926.40   1
   0  -2   5  61735. 1931.65   1
   0  -2  -5  62411. 2101.01   1
   0   2   5  58806. 1956.44   1
   0   2   5  63575. 2146.07   1
   0   2  -5  60571. 1907.62  -1
   0   2  -5  60796. 1904.62   1
   0  -2   6 202103. 6293.65   1
   0  -2   6 204844. 6365.00   1
   0  -2  -6 204731. 6511.45   1
   0  -2  -6 200188. 6383.77   1
   0   2   6 207397. 6624.10   1
   0   2   6 209575. 6620.35   1
   0   2  -6 206196. 6406.30   1
   0   2  -6 209125. 6515.20  -1
   0  -2   7  60383. 1927.90   1
   0  -2   7  61397. 1944.80   1
   0  -2  -7  58881. 2035.30   1
   0  -2  -7  59557. 2045.81   1
   0   2   7  59782. 2013.52  -1
   0   2  -7  60721. 1918.89   1
   0   2  -7  59820. 1915.13   1
   0  -2   8  22929. 777.694   1
   0  -2  -8  20826. 870.822   1
   0  -2  -8  20912. 869.319  -1
   0   2   8  21127. 898.610   1
   0   2   8  22073. 855.050   1
   0  -2   9 154975. 4866.69   1
   0  -2   9 153999. 4855.42   1
   0  -2  -9 162148. 5245.96   1
   0  -2  -9 163312. 5294.78   1
   0   2   9 157191. 5099.51   1
   0   2   9 154863. 4964.32   1
   0   2  -9 165865. 5197.14   1
   0   2  -9 159557. 5031.91   1
   0  -2  10  18618. 685.317   1
   0  -2  10  19057. 684.941   1
   0  -2 -10  19970. 909.500   1
   0  -2 -10  18652. 838.527   1
   0   2  10  19380. 852.797   1
   0   2 -10  19380. 700.713   1
   0   2 -10  18442. 699.962   1
   0  -2 -11 3830.26 371.611   1
   0  -2 -11 3716.86 367.855  -1
   0   2  11 3067.59 274.239  -1
   0   2  11 3634.24 354.788   1
   0   2 -11 2987.98 233.195  -1
   0   2 -11 3619.22 235.073   1
   0  -2  12  44574. 1494.55   1
   0  -2 -12  44649. 1687.94   1
   0  -2 -12  44048. 1664.29   1
   0   2  12  43710. 1646.64   1
   0   2  12  42959. 1536.61   1
   0   2 -12  45212. 1564.40   1
   0  -2  13  92452. 3015.77   1
   0  -2  13  93917. 3028.54   1
   0  -2 -13  92752. 3193.39   1
   0  -2 -13  90537. 3120.16   1
   0   2  13  90875. 3125.04  -1
   0   2  13  91851. 3061.58   1
   0   2 -13  92940. 3022.53   1
   0   2 -13  94255. 3099.88   1
   0  -2  14  808.86 205.332   1
   0  -2  14  974.46 149.906   1
   0  -2 -14 1645.14 308.111   1
   0   2  14  892.98 195.531   1
   0   2 -14 1225.68 219.038   1
   0  -2  15 119151. 3871.57   1
   0  -2  15 118738. 3815.24   1
   0  -2 -15 119226. 4048.06   1
   0  -2 -15 117349. 3984.22   1
   0   2  15 120728. 4081.86   1
   0   2  15 115959. 3807.73   1
   0   2 -15 122681. 4021.78   1
   0   2 -15 122944. 3984.22   1
   0  -2  16  12756. 551.633   1
   0  -2  16  12276. 597.070   1
   0  -2 -16  13451. 771.310   1
   0  -2 -16  11585. 712.729   1
   0   2  16  13060. 748.028   1
   0   2  16  13545. 637.251   1
   0   2 -16  12253. 589.185   1
   0   2 -16  12054. 626.736   1
   0  -2  17  284.49 208.862   1
   0  -2  17  461.88 146.151   1
   0  -2 -17  724.75 311.453   1
   0  -2 -17  312.80 305.144   1
   0   2  17  300.26 179.384   1
   0   2  17  629.74 284.528   1
   0   2 -17  258.05 242.320   1
   0   2 -17  778.07 227.075   1
   0  -2  18  14491. 688.321   1
   0  -2 -18  14097. 845.662   1
   0  -2 -18  12914. 787.457   1
   0   2  18  16162. 734.134   1
   0   2  18  14840. 825.384   1
   0   2 -18  13582. 661.284   1
   0   2 -18  13045. 705.970   1
   0  -2  19  77506. 2582.05   1
   0  -2  19  72963. 2510.32   1
   0  -2 -19  74202. 2744.65   1
   0  -2 -19  72437. 2686.44   1
   0   2  19  74390. 2699.21   1
   0   2  19  78746. 2685.31   1
   0   2 -19  73789. 2543.37   1
   0  -2  20 1829.51 208.937   1
   0  -2  20 1843.03 319.527   1
   0  -2 -20 1217.80 392.039   1
   0  -2 -20 1562.15 406.308   1
   0   2  20 1309.80 364.025   1
   0   2  20 1490.80 244.574   1
   0   2 -20 1193.01 306.121   1
   0   2 -20 1977.47 347.765   1
   0  -2  21  68344. 2307.92   1
   0  -2  21  66391. 2351.48   1
   0  -2 -21  70034. 2639.50   1
   0  -2 -21  68682. 2601.95   1
   0   2 -21  68006. 2476.15   1
   0   2 -21  72437. 2551.26   1
   0  -2  22  18843. 768.681   1
   0  -2 -22  17927. 1016.52   1
   0   2  22  19380. 838.903   1
   0   2 -22  17101. 905.369   1
   0  -2  23 8573.03 457.378   1
   0  -2  23 6721.74 543.747   1
   0  -2 -23 6890.72 653.022   1
   0  -2 -23 7239.95 673.300  -1
   0   2  23 7622.97 654.149   1
   0   2  23 8325.19 476.530   1
   0   2 -23 6939.54 586.556   1
   0   2 -23 7217.42 554.262   1
   0  -2  24  12257. 577.168   1
   0  -2  24  11164. 712.729   1
   0  -2 -24  12610. 852.046   1
   0  -2 -24  10879. 817.123   1
   0   2  24  11333. 574.915   1
   0   2  24  11123. 769.057   1
   0   2 -24  10544. 737.513   1
   0   2 -24  11419. 721.366   1
   0  -2  25  24341. 962.072   1
   0  -2  25  23549. 1110.03   1
   0  -2 -25  24465. 1292.90   1
   0  -2 -25  23631. 1246.71   1
   0   2  25  24142. 981.974   1
   0   2  25  24578. 1222.30   1
   0   2 -25  24514. 1222.30   1
   0   2 -25  23980. 1130.68   1
   0  -2  26  367.59 358.918   1
   0  -2  26   20.19 160.082   1
   0  -2 -26  204.62 420.953   1
   0  -2 -26  204.92 365.490   1
   0   2  26  325.95 175.516   1
   0   2  26  352.87 376.643   1
   0   2 -26  281.97 403.680   1
   0   2 -26   39.54 328.802   1
   0  -2  27  26050. 1201.65   1
   0  -2 -27  27315. 1401.43   1
   0  -2 -27  27353. 1425.46   1
   0   2  27  25062. 1015.02   1
   0   2  27  25749. 1271.12   1
   0   2 -27  25783. 1232.44   1
   0  -2  28  15929. 717.611  -1
   0  -2  28  15554. 923.394   1
   0  -2 -28  16372. 1066.09   1
   0  -2 -28  14048. 1052.20   1
   0   2  28  15291. 699.962   1
   0   2  28  14720. 931.655   1
   0   2 -28  15452. 1020.28   1
   0   2 -28  13842. 921.892   1
   0  -2  29 2090.12 261.434   1
   0  -2  29 1732.26 472.399   1
   0  -2 -29 1816.37 538.490   1
   0  -2 -29 1253.47 543.747   1
   0   2  29 1918.89 242.471   1
   0   2  29 1816.37 470.897   1
   0   2 -29 2063.08 509.575   1
   0   2 -29  747.65 535.861   1
   0  -2  30 4277.13 342.283   1
   0  -2 -30 3225.68 635.749   1
   0  -2 -30 4528.72 704.468   1
   0   2  30 4134.43 331.618   1
   0   2  30 4352.23 603.830   1
   0   2 -30 3706.72 692.451   1
   0  -2  31  13158. 643.634   1
   0  -2  31  12861. 904.242   1
   0  -2 -31  13042. 1055.58   1
   0  -2 -31  10030. 915.508   1
   0   2  31  12062. 882.087   1
   0   2  31  13136. 638.753   1
   0   2 -31  12234. 1031.17   1
   0   2 -31 9812.23 900.863   1
   0  -2  32  276.64 219.038   1
   0  -2  32  763.80 498.310  -1
   0  -2 -32   34.51 499.061   1
   0   2  32  550.51 469.395   1
   0   2  32  562.90 184.829   1
   0   2 -32 -185.99 575.290   1
   0   2 -32  -35.49 476.905   1
   0  -2  33 3580.17 358.918   1
   0  -2  33 3509.57 659.031   1
   0   2  33 2770.93 644.010   1
   0   2  33 3659.78 338.978   1
   0   2 -33 3667.29 686.443   1
   0   2 -33 3491.92 752.909   1
   0  -2  34 6834.39 497.559   1
   0  -2  34 7269.99 808.486   1
   0  -2 -34 6939.54 847.164   1
   0  -2  35 1313.18 556.515   1
   0  -2  35 2283.14 368.043   1
   0   2  35 1392.79 428.464   1
   0   2 -35 1037.55 632.744   1
   0   2 -35 1383.78 648.892   1
   0  -2 -36  -99.85 520.841   1
   0   2  36  525.35 266.804   1
   0  -2 -37 2965.07 556.139   1
   0   2  37 8832.14 708.223  -1
   0  -3   0  263.50  94.179   1
   0  -3   0  275.52 111.228   1
   0   3   0  214.61 110.064   1
   0   3   0  150.73  91.063   1
   0  -3   1 323845.  10079.   1
   0  -3   1 304018. 9478.02  -1
   0  -3  -1 309162. 9680.80   1
   0   3   1 318625. 9947.42   1
   0   3  -1 311641. 9725.86   1
   0   3  -1 310890. 9673.29   1
   0  -3   2  22430. 765.677   1
   0  -3  -2  19726. 769.432   1
   0  -3  -2  21750. 802.478   1
   0   3   2  22426. 820.127   1
   0   3   2  20897. 814.494   1
   0   3  -2  21697. 740.142   1
   0   3  -2  19685. 702.590   1
   0  -3   3  75291. 2381.90   1
   0  -3  -3  70372. 2349.98   1
   0   3   3  72925. 2436.35   1
   0   3   3  72512. 2380.77   1
   0   3  -3  73977. 2359.37   1
   0  -3   4  222.79  65.715   1
   0  -3   4  205.37  57.679   1
   0  -3  -4  234.40 166.616   1
   0  -3  -4  129.89 134.622   1
   0   3   4  353.06 125.122   1
   0   3   4  318.14 158.130   1
   0   3  -4  259.63  70.109   1
   0   3  -4  367.59  56.891   1
   0  -3   5 174652. 5444.98   1
   0  -3   5 182839. 5704.09   1
   0  -3  -5 188509. 6034.54   1
   0  -3  -5 187458. 5996.99   1
   0   3   5 187044. 5940.66   1
   0   3   5 193203. 6192.26   1
   0  -3   6  14179. 465.264   1
   0  -3  -6  14119. 662.410   1
   0  -3  -6  13211. 628.238   1
   0   3   6  14897. 683.815   1
   0   3   6  13316. 582.801   1
   0  -3   7  98423. 3105.89   1
   0  -3   7  95456. 3022.53   1
   0  -3  -7  97822. 3274.50   1
   0  -3  -7  95306. 3208.78   1
   0   3   7  99624. 3262.86   1
   0   3   7 103455. 3450.24   1
   0  -3   8  541.49  57.792   1
   0  -3  -8 -135.41 1517.08   1
   0   3   8  859.93 224.483  -1
   0   3  -8  552.38  72.287   1
   0   3  -8  443.86  71.085   1
   0  -3   9  25374. 819.000   1
   0  -3  -9  28314. 1201.65   1
   0  -3  -9  28607. 1168.61   1
   0   3   9  28652. 1089.75   1
   0   3   9  30195. 1253.10   1
   0   3  -9  27957. 926.022   1
   0   3  -9  27773. 898.985   1
   0  -3  10  210.66  94.442  -1
   0  -3 -10   24.99 251.258   1
   0  -3 -10  345.62 222.418   1
   0   3  10  466.39 158.993   1
   0   3  10 -195.57 5264.73   1
   0   3 -10  203.49  90.574   1
   0  -3  11 236951. 7390.15   1
   0  -3  11 232144. 7239.95   1
   0  -3 -11 234284. 7566.65   1
   0  -3 -11 226887. 7322.56   1
   0   3  11 227901. 7251.21   1
   0   3  11 229252. 7416.44   1
   0   3 -11 225535. 7067.21   1
   0   3 -11 237439. 7401.42   1
   0  -3  12 2603.45 167.818   1
   0  -3  12 2819.37 204.130   1
   0  -3 -12 3380.77 384.904   1
   0   3  12 2702.59 267.067   1
   0   3 -12 3224.93 197.972   1
   0   3 -12 2990.98 219.452   1
   0  -3  13  77957. 2512.58  -1
   0  -3  13  78445. 2515.96   1
   0  -3 -13  81299. 2877.20   1
   0  -3 -13  79572. 2840.40   1
   0   3  13  79309. 2796.09   1
   0   3  13  74615. 2527.97   1
   0   3 -13  78295. 2515.96   1
   0   3 -13  76981. 2523.84   1
   0  -3  14   79.72 100.225   1
   0  -3 -14   30.51 249.380   1
   0  -3 -14    3.23 304.093   1
   0   3  14  403.30 165.753   1
   0   3  14  114.95 241.194   1
   0   3 -14  509.20 167.893   1
   0  -3  15  41006. 1412.69   1
   0  -3  15  42508. 1428.84   1
   0  -3 -15  41870. 1688.32   1
   0  -3 -15  40668. 1661.66   1
   0   3  15  42095. 1677.05   1
   0   3  15  40518. 1491.92   1
   0   3 -15  41382. 1414.19   1
   0   3 -15  38753. 1383.78   1
   0  -3  16  246.83 202.553   1
   0  -3  16  267.29 124.296   1
   0  -3 -16   88.13 290.349   1
   0  -3 -16  299.10 278.896   1
   0   3  16  234.55 167.067  -1
   0   3  16  466.02 301.802   1
   0   3 -16  235.97 164.589   1
   0   3 -16  105.67 197.033   1
   0  -3  17  61021. 2019.52   1
   0  -3  17  60683. 2046.94   1
   0  -3 -17  61847. 2345.47   1
   0  -3 -17  61998. 2357.11   1
   0   3  17  60758. 2130.68   1
   0   3  17  60383. 2261.36   1
   0   3 -17  59895. 2083.36   1
   0   3 -17  62261. 2089.37   1
   0  -3  18 1156.96 166.354   1
   0  -3  18  886.97 239.880   1
   0  -3 -18  903.87 360.495   1
   0   3  18 1491.17 363.988   1
   0   3 -18  738.26 244.949  -1
   0   3 -18  770.56 215.584   1
   0  -3  19  43072. 1477.66   1
   0  -3  19  44236. 1573.79   1
   0  -3 -19  45963. 1882.84   1
   0  -3 -19  48141. 1978.59   1
   0   3  19  43935. 1609.84   1
   0   3  19  43898. 1790.46   1
   0   3 -19  46076. 1709.72   1
   0   3 -19  47766. 1680.06   1
   0  -3  20  10323. 476.154   1
   0  -3  20 9770.93 541.494   1
   0  -3 -20 8937.28 746.526   1
   0  -3 -20  10642. 758.918   1
   0   3  20 9294.02 694.329   1
   0   3  20  10379. 553.511   1
   0   3 -20 8111.15 483.289   1
   0   3 -20 9271.49 581.674  -1
   0  -3  21  31682. 1228.31   1
   0  -3 -21  32272. 1491.17   1
   0  -3 -21  30590. 1478.78   1
   0   3  21  34784. 1323.69  -1
   0   3  21  32381. 1456.25   1
   0   3 -21  34277. 1308.67   1
   0  -3  22  673.30 285.843   1
   0  -3  22 1473.52 204.431   1
   0  -3 -22  463.39 404.806   1
   0  -3 -22 1287.27 382.275   1
   0   3  22 1358.62 234.472   1
   0   3  22 2129.93 444.986   1
   0   3 -22  778.82 332.332   1
   0   3 -22 1196.39 292.114   1
   0  -3  23  56327. 2018.40   1
   0  -3  23  52497. 1797.22  -1
   0  -3 -23  51896. 2130.68   1
   0  -3 -23  55051. 2252.72   1
   0   3 -23  56703. 2142.69   1
   0   3 -23  56703. 2037.55   1
   0  -3  24  202.14 150.619   1
   0  -3 -24  -13.26 365.903   1
   0  -3 -24  197.78 389.786   1
   0   3  24  334.92 168.494   1
   0   3  24  186.18 342.809   1
   0   3 -24   77.24 269.170   1
   0   3 -24   12.46 331.355   1
   0  -3  25 4025.53 470.146   1
   0  -3  25 3972.96 298.160   1
   0  -3 -25 4494.93 626.361   1
   0   3  25 4930.52 563.274   1
   0   3 -25 4138.19 533.608   1
   0  -3  26 1002.25 416.447   1
   0  -3  26 1205.78 214.532   1
   0  -3 -26 1576.42 497.559   1
   0  -3 -26  988.73 420.953   1
   0   3  26 1129.93 214.345   1
   0   3  26 1039.05 414.945   1
   0   3 -26  884.72 377.394   1
   0   3 -26 1090.50 434.096   1
   0  -3  27  14532. 870.822   1
   0  -3 -27  12933. 923.018   1
   0   3  27  13620. 936.161   1
   0   3  27  12632. 615.095   1
   0   3 -27  14247. 850.544   1
   0   3 -27  13995. 944.423   1
   0  -3  28  -91.33 171.385   1
   0  -3  28   93.95 376.643   1
   0  -3 -28   51.48 412.692   1
   0  -3 -28 -177.81 470.146   1
   0   3  28  116.22 147.202   1
   0   3  28  -17.60 353.098   1
   0   3 -28 -359.78 372.024   1
   0   3 -28 -198.35 443.484   1
   0  -3  29  34927. 1293.28   1
   0  -3  29  36748. 1549.75   1
   0  -3 -29  37214. 1774.31   1
   0  -3 -29  37105. 1822.00   1
   0   3  29  33331. 1524.22   1
   0   3  29  34311. 1295.53   1
   0   3 -29  33492. 1506.57   1
   0  -3  30 1382.27 494.930   1
   0  -3 -30  306.91 534.735   1
   0   3  30 1662.03 479.158   1
   0   3 -30  606.83 470.146   1
   0  -3  31  467.14 467.517   1
   0  -3  31 -163.24 185.618   1
   0  -3 -31  167.37 484.416   1
   0   3  31   52.12 148.930   1
   0   3  31 -394.29 419.076   1
   0   3 -31  484.79 565.903   1
   0   3 -31  -56.14 447.240   1
   0  -3  32  585.05 234.172   1
   0  -3  32  170.45 499.436   1
   0  -3 -32  112.35 464.889   1
   0   3  32  342.28 419.451   1
   0   3  32  114.42 161.735  -1
   0   3 -32  108.00 474.652   1
   0   3 -32 -145.93 617.348   1
   0  -3  33 7968.45 806.233   1
   0  -3  33  10571. 587.682   1
   0  -3 -33 8272.62 889.597   1
   0   3  33  10702. 578.670   1
   0   3  33 9233.94 809.612   1
   0   3 -33 8730.75 1020.28   1
   0  -3  34   64.74 252.610   1
   0  -3  34  176.49 490.799   1
   0  -3 -34  -36.05 485.542   1
   0   3  34   58.96 196.695   1
   0   3  34  511.83 381.900   1
   0  -3 -35 7968.45 827.262   1
   0   3  35  13004. 719.864   1
   0  -3 -36  564.03 447.240   1
   0   3  36  371.72 337.251   1
   0  -4   1 114795. 3686.44   1
   0  -4  -1 114345. 3707.84  -1
   0   4   1 123207. 3939.16   1
   0   4   1 120991. 3927.90   1
   0   4  -1 120353. 3826.51   1
   0  -4   2  13458. 539.992   1
   0  -4   2  13233. 507.698   1
   0  -4  -2  14202. 636.124   1
   0  -4  -2  14044. 639.504   1
   0   4   2  14303. 591.438   1
   0   4   2  14277. 647.014   1
   0  -4   3 211453. 6605.33   1
   0  -4   3 204318. 6406.30   1
   0  -4  -3 206121. 6582.80   1
   0  -4  -3 195869. 6267.36   1
   0   4   3 212091. 6774.31   1
   0   4   3 215734. 6823.12   1
   0   4  -3 211228. 6635.37   1
   0   4  -3 214795. 6710.47   1
   0  -4   4 2223.05 142.471   1
   0  -4   4 2086.37 158.468   1
   0  -4  -4 2087.12 264.814   1
   0  -4  -4 2141.94 274.314   1
   0   4   4 2541.87 229.065   1
   0   4   4 2111.15 259.857   1
   0   4  -4 2327.82 140.593   1
   0   4  -4 2172.36 170.634   1
   0  -4  -5  37852. 1421.33   1
   0  -4  -5  40518. 1506.95   1
   0   4   5  42696. 1571.16   1
   0   4   5  43710. 1538.86   1
   0   4  -5  44086. 1441.61   1
   0  -4   6  54187. 1713.85   1
   0  -4  -6  59707. 2123.17   1
   0   4   6  58656. 2085.99   1
   0   4  -6  60946. 1919.64   1
   0   4  -6  60871. 1941.42   1
   0  -4  -7  95118. 3224.56   1
   0  -4  -7  93766. 3197.14   1
   0   4   7  93616. 3182.87   1
   0   4   7  96057. 3173.49   1
   0  -4  -8 9861.05 604.581   1
   0  -4  -8 8430.33 534.735   1
   0  -4  -9 130980. 4363.50   1
   0  -4  -9 128952. 4318.43   1
   0   4   9 132782. 4322.19   1
   0   4   9 133796. 4453.62   1
   0  -4 -10  12933. 710.101   1
   0   4  10  13601. 635.749   1
   0  -4 -11  -96.96 223.545   1
   0  -4 -11  282.20 250.807  -1
   0   4  11  172.14 155.539   1
   0   4  11  247.73 264.025   1
   0  -4 -12  34694. 1439.73   1
   0   4  12  34266. 1296.28   1
   0  -4  13  59745. 1892.22   1
   0  -4 -13  58731. 2202.03   1
   0   4  13  57717. 2034.17   1
   0   4 -13  53736. 1719.11   1
   0  -4  14  869.70 107.510   1
   0  -4  14  998.87 105.107   1
   0   4  14 2312.43 396.545   1
   0   4 -14 1735.63 179.046   1
   0   4 -14 1932.78 178.333   1
   0  -4  15  49793. 1613.59   1
   0  -4  15  44837. 1461.13   1
   0  -4 -15  47653. 1896.36   1
   0  -4 -15  46151. 1882.46   1
   0   4  15  48404. 1748.03   1
   0   4  15  50206. 1957.94   1
   0   4 -15  47090. 1577.54   1
   0   4 -15  45625. 1493.05   1
   0  -4  16  10120. 404.806   1
   0  -4 -16 9354.10 694.329   1
   0   4  16 9842.27 685.317   1
   0   4 -16  10068. 434.472   1
   0   4 -16 9173.86 439.354   1
   0  -4  17 3999.25 225.835  -1
   0  -4 -17 4337.21 532.106   1
   0  -4 -17 4539.99 516.710   1
   0   4  17 4029.29 341.269   1
   0   4  17 3641.75 471.648   1
   0   4 -17 3698.46 296.357   1
   0  -4  18  10345. 428.088   1
   0  -4  18  10988. 488.922   1
   0  -4 -18  12020. 797.596   1
   0  -4 -18  12227. 838.527   1
   0   4  18  10289. 548.629   1
   0   4  18  11513. 761.922   1
   0   4 -18  11018. 537.739   1
   0  -4  19  48141. 1624.11   1
   0  -4  19  49268. 1632.74   1
   0  -4 -19  48855. 2066.09   1
   0  -4 -19  47953. 1968.83   1
   0   4  19  48216. 1743.52   1
   0   4  19  48442. 1954.94   1
   0   4 -19  47390. 1680.81   1
   0   4 -19  49230. 1660.91   1
   0  -4  20  258.77 215.358   1
   0  -4  20  870.45 151.483   1
   0  -4 -20  -20.15 370.709   1
   0  -4 -20  405.56 324.746   1
   0   4  20  696.58 194.893   1
   0   4  20  642.51 351.558   1
   0   4 -20  458.51 235.223   1
   0   4 -20  622.98 252.272   1
   0  -4  21  37777. 1294.78   1
   0  -4  21  37086. 1323.69   1
   0  -4 -21  39504. 1770.56   1
   0  -4 -21  38002. 1681.19   1
   0   4  21  37319. 1619.22   1
   0   4  21  35539. 1354.11   1
   0   4 -21  38190. 1364.63   1
   0   4 -21  37424. 1428.46   1
   0  -4  22  11686. 498.310   1
   0  -4  22  12249. 597.070   1
   0  -4 -22  13571. 909.124   1
   0  -4 -22  12674. 906.120   1
   0   4  22  12294. 622.230   1
   0   4  22  12632. 839.278   1
   0   4 -22  11994. 672.174   1
   0   4 -22  13030. 621.854   1
   0  -4  23 2349.60 220.090   1
   0  -4  23 1778.82 322.493   1
   0   4  23 2039.43 460.758   1
   0   4 -23 1544.87 364.776   1
   0   4 -23 1800.60 323.019   1
   0  -4  24 -307.74 290.387   1
   0  -4 -24  -43.90 393.541   1
   0  -4 -24 -294.22 399.549   1
   0   4  24  252.05 169.921  -1
   0   4  24  311.34 334.021   1
   0   4 -24  209.12 320.090   1
   0   4 -24  -44.27 278.295   1
   0  -4 -25  26305. 1356.36   1
   0   4  25  25772. 1062.33   1
   0   4 -25  26012. 1085.99   1
   0  -4  26  -84.94 158.543   1
   0  -4  26   71.80 334.359   1
   0  -4 -26  466.39 401.427   1
   0  -4 -26   92.71 405.182   1
   0   4  26   37.59 148.817   1
   0   4  26  121.37 362.035   1
   0   4 -26  324.60 330.379   1
   0   4 -26   88.02 407.059   1
   0  -4  27  16301. 675.178   1
   0  -4  27  17758. 882.838   1
   0  -4 -27  17946. 1098.38   1
   0  -4 -27  15569. 1110.03   1
   0   4  27  17593. 1008.26   1
   0   4  27  15685. 712.729   1
   0   4 -27  14799. 800.976  -1
   0   4 -27  16955.  999.62   1
   0  -4  28 2054.45 245.249   1
   0  -4 -28 2715.73 625.234   1
   0  -4 -28 1690.95 522.343   1
   0   4  28 2235.82 471.648   1
   0   4  28 1908.37 271.874   1
   0   4 -28 1511.45 519.714   1
   0  -4  29 3411.56 303.304   1
   0  -4  29 3520.46 536.612   1
   0  -4 -29 3321.81 615.095   1
   0   4  29 3177.62 282.876   1
   0   4  29 3277.88 509.951   1
   0   4 -29 1823.13 563.649   1
   0  -4  30  332.63 219.790   1
   0  -4  30  315.02 448.742   1
   0  -4 -30  756.66 467.517   1
   0   4  30  231.39 158.881   1
   0   4  30  526.10 424.709   1
   0   4 -30  354.98 443.484   1
   0   4 -30  132.78 543.372   1
   0  -4  31  17615. 1000.00   1
   0  -4  31  18100. 773.938   1
   0  -4 -31  17477. 1151.33   1
   0   4  31  17582. 1050.69   1
   0   4  31  17863. 780.698   1
   0   4 -31  18220. 1240.33   1
   0  -4  32  115.21 241.156  -1
   0  -4  32  -39.99 491.175   1
   0  -4 -32  401.05 521.967   1
   0   4  32  438.98 445.737   1
   0   4 -32 -257.64 602.703   1
   0   4 -32 -207.44 604.581   1
   0  -4  33 3596.32 627.487   1
   0  -4  33 3710.47 414.945   1
   0  -4 -33 3657.15 634.246   1
   0   4  33 4408.56 363.687   1
   0   4  33 3845.28 651.145   1
   0  -4 -34 1110.03 498.685   1
   0   4  34 1551.63 262.073   1
   0  -5   0 -198.69 193.992   1
   0  -5   0  236.42 170.822   1
   0   5   0  162.22 123.282   1
   0   5   0   48.18 166.954  -1
   0  -5   1 102065. 3336.46   1
   0  -5   1  97033. 3211.04   1
   0  -5  -1  99624. 3328.57   1
   0  -5  -1 105633. 3485.91   1
   0   5   1 108261. 3584.30   1
   0   5   1 111228. 3596.69   1
   0   5  -1 112467. 3606.08   1
   0   5  -1 109388. 3578.67  -1
   0  -5  -2 117612. 3897.86   1
   0  -5  -2 109914. 3635.37   1
   0   5   2 113856. 3770.18   1
   0   5   2 111716. 3624.10   1
   0   5  -2 114833. 3723.24   1
   0   5  -2 112016. 3573.41   1
   0  -5   3  11791. 513.706   1
   0  -5  -3  12294. 658.655   1
   0  -5  -3  11968. 617.724   1
   0   5   3  13477. 669.921   1
   0   5   3  13136. 586.556   1
   0   5  -3  12430. 487.795   1
   0  -5   4  62486. 2048.44   1
   0  -5   4  65941. 2187.38   1
   0  -5  -4  67142. 2387.16   1
   0   5   4  64964. 2292.52   1
   0   5  -4  64852. 2143.07   1
   0   5  -4  63049. 2031.92   1
   0  -5   5  77281. 2512.58   1
   0  -5   5  78896. 2529.48   1
   0  -5  -5  79459. 2747.65   1
   0  -5  -5  77957. 2722.49   1
   0   5   5  81787. 2731.88   1
   0   5   5  85655. 2946.30   1
   0   5  -5  83590. 2698.46   1
   0   5  -5  83515. 2646.64   1
   0  -5   6 2049.19 163.725   1
   0  -5   6 1699.59 177.844   1
   0  -5  -6 1912.88 341.119   1
   0  -5  -6 1621.85 287.795   1
   0   5   6 1876.83 303.192   1
   0   5   6 1558.77 219.902   1
   0   5  -6 1650.02 155.088   1
   0  -5   7  23057. 785.579   1
   0  -5   7  24897. 817.498   1
   0  -5  -7  22381. 1041.68   1
   0  -5  -7  26237. 1129.93   1
   0   5   7  28246. 1202.78   1
   0   5   7  30045. 1151.71   1
   0   5  -7  29606. 981.974   1
   0   5  -7  31799. 1021.40   1
   0  -5  -8  93503. 3234.32   1
   0   5   8  95644. 3179.49   1
   0  -5  -9  16962. 902.740   1
   0  -5  -9  16448. 840.029   1
   0   5   9  17214. 755.163   1
   0   5   9  18366. 911.753   1
   0  -5 -10  26628. 1201.28   1
   0  -5 -10  23992. 1092.00   1
   0   5  10  26849. 1205.41   1
   0   5  10  25370. 1022.15   1
   0  -5 -11  36947. 1549.75   1
   0  -5 -11  39504. 1599.70   1
   0   5  11  40068. 1492.68   1
   0   5  11  41344. 1679.68   1
   0  -5 -12 2580.17 387.157   1
   0  -5 -12 2467.52 399.924   1
   0   5  12 3256.85 451.370   1
   0   5  12 3388.66 314.682   1
   0   5  13 3324.07 310.439   1
   0  -5 -15 9372.88 692.827  -1
   0   5  15 8633.11 502.440   1
   0  -5 -16 7900.86 645.888   1
   0   5  16 5272.24 388.284   1
   0  -5 -17  24968. 1218.17   1
   0   5  17  27582. 1101.76   1
   0  -5 -18  13965. 867.817   1
   0  -5 -18  14059. 951.557   1
   0   5  18  15884. 737.889   1
   0   5  18  15723. 943.672   1
   0  -5  19  11333. 397.296   1
   0  -5 -19  10458. 764.175   1
   0  -5 -19 9132.55 783.702   1
   0   5  19  12422. 823.882   1
   0   5  19  11329. 586.931   1
   0  -5  20  41419. 1340.22   1
   0  -5  20  44010. 1428.84   1
   0  -5 -20  43109. 1841.53   1
   0  -5 -20  45325. 1968.08   1
   0   5  20  41795. 1547.88   1
   0   5  20  42659. 1796.84   1
   0   5 -20  43748. 1458.50   1
   0  -5  21 5478.78 258.543   1
   0  -5  21 6372.51 270.822   1
   0  -5 -21 5843.03 680.059   1
   0   5 -21 4262.11 332.970   1
   0   5 -21 4367.25 317.949   1
   0  -5  22  248.82 114.232   1
   0  -5  22  157.49 136.838   1
   0  -5 -22  349.19 372.249   1
   0  -5 -22  549.38 444.986   1
   0   5  22  224.15 165.941  -1
   0   5  22  810.36 371.160   1
   0   5 -22  257.23 270.672   1
   0   5 -22  275.37 243.710   1
   0  -5  23  32204. 1089.00   1
   0  -5 -23  29932. 1467.14  -1
   0   5  23  30571. 1196.77   1
   0   5 -23  30353. 1151.71   1
   0  -5  24 6207.28 299.774   1
   0  -5 -24 5182.12 665.039   1
   0  -5 -24 5309.80 621.103  -1
   0   5  24 5373.63 616.973   1
   0   5  24 6169.73 405.933   1
   0   5 -24 5460.00 450.619   1
   0  -5  25  732.26 203.717   1
   0  -5  25  862.94 157.304   1
   0   5  25 1092.00 431.092   1
   0   5  25 1010.14 202.065   1
   0   5 -25 1033.42 442.733   1
   0   5 -25  292.83 337.364   1
   0  -5  26 3920.39 251.671   1
   0  -5 -26 4757.79 607.960   1
   0  -5 -26 4284.64 661.284   1
   0   5  26 4509.95 353.698   1
   0   5  26 4018.02 562.898   1
   0   5 -26 3535.48 457.754   1
   0   5 -26 2848.66 485.542   1
   0  -5  27 6552.75 337.927   1
   0  -5  27 5219.67 382.651   1
   0  -5 -27 5238.45 772.812   1
   0  -5 -27 5888.09 693.953  -1
   0  -5  28 1025.16 292.189   1
   0  -5  28 1023.28 189.598   1
   0  -5 -28 1185.13 487.044   1
   0   5  28 1025.53 205.257   1
   0   5 -28  868.94 457.754   1
   0   5 -28  120.39 520.841   1
   0  -5  29  10068. 579.046   1
   0  -5  29  11389. 499.812   1
   0  -5 -29  10988. 894.104   1
   0   5  29  11465. 858.054   1
   0   5  29  11416. 573.788   1
   0   5 -29  10973. 853.923   1
   0  -5  30 4832.89 340.969   1
   0  -5 -30 5122.04 658.655   1
   0   5  30 4682.68 597.446   1
   0   5  30 4712.73 347.465   1
   0   5 -30 3101.39 753.285   1
   0   5 -30 3150.58 612.842   1
   0  -5  31  -95.68 355.614   1
   0  -5  31   27.31 232.332   1
   0  -5 -31  164.36 404.431   1
   0   5  31  539.62 390.537   1
   0   5  31  349.30 177.582   1
   0  -5 -32 2342.84 544.874   1
   0   5  32 1996.24 267.931   1
   0  -5 -33 6365.00 768.306   1
   0   5  33 9628.23 571.535   1
   0  -6   0 155163. 5039.42   1
   0  -6   0 160233. 5234.69   1
   0   6   0 161397. 5238.45   1
   0   6   0 160721. 5129.55   1
   0  -6   1 8986.10 546.000   1
   0  -6  -1 8051.06 559.894   1
   0   6   1  11761. 541.119   1
   0   6   1  11517. 615.471   1
   0   6  -1  11682. 518.588   1
   0   6  -1  13094. 642.508   1
   0  -6   2  11029. 590.311   1
   0  -6  -2  10466. 644.385   1
   0   6   2 9534.35 564.776   1
   0   6  -2 9470.51 434.096   1
   0  -6   3  45212. 1628.24   1
   0  -6   3  47428. 1645.51   1
   0  -6  -3  46827. 1743.90   1
   0  -6  -3  45550. 1760.04   1
   0   6   3  52460. 1828.76   1
   0   6   3  50732. 1882.46   1
   0   6  -3  50432. 1762.67   1
   0   6  -3  52309. 1738.64   1
   0  -6   4  17529. 705.219   1
   0  -6   4  19046. 799.098   1
   0  -6  -4  19354. 949.304   1
   0  -6  -4  17540. 841.907   1
   0   6   4  18374. 778.445   1
   0   6   4  18806. 893.728   1
   0   6  -4  18047. 743.522   1
   0   6  -4  18734. 689.072   1
   0  -6   5 2468.64 221.479   1
   0  -6  -5 2682.69 354.112   1
   0   6  -5 2216.30 168.757   1
   0  -6   6 161585. 5133.30   1
   0  -6   6 159857. 5039.42   1
   0  -6  -6 160270. 5351.10   1
   0  -6  -6 159857. 5276.00   1
   0   6   6 170747. 5505.06   1
   0   6   6 169020. 5580.17   1
   0   6  -6 168945. 5351.10   1
   0   6  -6 173301. 5422.45   1
   0  -6   7 5910.62 312.392   1
   0  -6   7 7089.74 319.827   1
   0  -6  -7 7247.46 547.127   1
   0  -6  -7 6413.81 583.552   1
   0   6   7 7810.73 568.531   1
   0   6   7 7604.20 452.872   1
   0   6  -7 7942.16 303.116   1
   0   6  -7 7405.17 344.611   1
   0  -6   8 8186.25 328.802  -1
   0  -6   8 7739.38 294.367   1
   0  -6  -8 8347.72 627.112   1
   0  -6  -8 8693.20 605.332   1
   0   6   8 7063.46 427.713   1
   0   6   8 8978.59 615.846   1
   0   6  -8 8141.19 317.536   1
   0   6  -8 7904.61 292.076   1
   0  -6  -9 7728.12 620.728  -1
   0  -6  -9 8084.86 597.070   1
   0   6   9  10015. 533.608   1
   0   6   9 9425.45 657.529   1
   0  -6 -10  49155. 1971.83   1
   0  -6 -10  49681. 1935.78   1
   0   6  10  53060. 1894.48   1
   0   6  10  54487. 2087.12   1
   0  -6 -11 3477.28 464.513   1
   0  -6 -11 4322.19 512.579   1
   0   6  11 4029.29 482.538   1
   0   6  11 3244.46 322.531   1
   0  -6 -12  57980. 2231.69   1
   0  -6 -12  57341. 2261.36   1
   0   6  12  63162. 2388.66   1
   0   6  12  59594. 2102.14   1
   0  -6 -13 5583.92 540.367   1
   0  -6 -13 5384.90 565.903   1
   0   6  13 5486.29 552.760   1
   0   6  13 4859.18 376.267   1
   0  -6 -14  680.06 411.190   1
   0  -6 -14  774.69 347.916   1
   0   6  14  718.36 377.018   1
   0   6  14  540.74 198.423   1
   0  -6 -15  630.12 317.611   1
   0   6  15 1089.37 373.676   1
   0   6  15  530.98 205.858   1
   0  -6 -16  75854. 2819.00   1
   0   6  16  79760. 2719.86   1
   0  -6 -17   32.35 321.967   1
   0   6  17  307.85 188.209   1
   0  -6 -18  22084. 1169.36   1
   0   6  18  22392. 951.557   1
   0  -6 -20 -458.88 381.149   1
   0   6  20 -128.16 165.114   1
   0   6  20  601.95 416.447   1
   0  -6 -21  510.33 392.039   1
   0   6  21   10.03 168.757   1
   0  -6 -22  27127. 1357.49   1
   0  -6 -22  28228. 1485.54   1
   0   6  22  28314. 1125.42   1
   0   6  22  31183. 1478.03   1
   0  -6 -23  -48.37 344.611   1
   0  -6 -23 -130.79 403.304  -1
   0   6  23   72.89 161.472   1
   0   6  23 -309.88 372.099   1
   0  -6 -24  10000. 805.106   1
   0  -6 -24 9988.72 913.630   1
   0   6  24  10030. 777.694   1
   0   6  24 8865.93 502.816  -1
   0  -6 -25 4119.41 702.966   1
   0  -6 -25 5816.74 731.505   1
   0   6  25 6150.95 412.692   1
   0   6  25 6226.06 656.777   1
   0  -6 -26  874.58 438.227   1
   0   6  26  885.84 200.338   1
   0   6  26  872.32 403.304   1
   0   6  27 2004.88 458.505   1
   0   6  27 1759.67 241.569   1
   0  -6 -28  14097. 1012.02   1
   0   6  28  14232. 942.545   1
   0   6  28  13714. 648.516  -1
   0  -6 -30 2338.34 546.376   1
   0   6  30 2073.97 262.298   1
   0  -6 -31 2265.11 541.870  -1
   0   6  31 2912.88 325.572   1
   0  -7   0  159.67 271.461   1
   0   7   0    4.50 215.509   1
   0  -7   1 1024.03 311.378   1
   0  -7   1 1068.34 268.306   1
   0  -7  -1 1532.48 330.867   1
   0  -7  -1  653.77 267.480   1
   0   7   1 1011.26 278.370   1
   0   7   1 1056.70 193.879   1
   0   7  -1  794.97 179.572   1
   0   7  -1  656.03 255.689   1
   0  -7   2  46301. 1733.76   1
   0  -7   2  45437. 1645.51   1
   0  -7  -2  47202. 1785.20   1
   0  -7  -2  46151. 1800.97   1
   0   7   2  50319. 1889.60   1
   0   7   2  50319. 1757.79   1
   0   7  -2  47615. 1733.01   1
   0   7  -2  50432. 1719.49   1
   0  -7   3  657.53 224.145   1
   0  -7   3  691.70 272.024   1
   0  -7  -3  705.22 287.457   1
   0   7   3  673.68 185.167  -1
   0   7  -3  629.36 151.671   1
   0   7  -3  998.87 245.099   1
   0  -7   4  75178. 2518.21   1
   0  -7   4  75291. 2585.05   1
   0  -7  -4  74953. 2671.42   1
   0  -7  -4  76305. 2781.07   1
   0   7   4  82764. 2925.27   1
   0   7   4  84454. 2831.39   1
   0   7  -4  85317. 2766.05   1
   0   7  -4  81525. 2747.27   1
   0  -7   5  820.88 254.525   1
   0  -7   5 1528.73 225.497   1
   0   7   5 2298.53 377.018   1
   0   7   5 2766.05 281.937   1
   0   7  -5 2036.42 259.932   1
   0   7  -5 2161.47 187.420   1
   0  -7   6 4926.77 315.133   1
   0  -7  -6 4010.51 454.750   1
   0  -7  -6 4817.87 540.743   1
   0   7   6 4299.66 341.757   1
   0   7   6 4829.14 473.901   1
   0   7  -6 4307.17 232.557   1
   0  -7   7  21250. 815.245   1
   0  -7   7  21502. 790.461   1
   0  -7  -7  22358. 1141.94   1
   0  -7  -7  21945. 1071.35   1
   0   7   7  21431. 1047.69   1
   0   7   7  21498. 910.251   1
   0   7  -7  21866. 748.779   1
   0   7  -7  20950. 797.220   1
   0  -7   8  89636. 2853.92   1
   0  -7   8  92264. 2963.20   1
   0  -7  -8  88058. 3199.77   1
   0  -7  -8  91138. 3239.95   1
   0   7   8  97822. 3441.98   1
   0   7   8  99249. 3323.69   1
   0   7  -8  99099. 3164.85   1
   0  -7  -9  532.48 372.812   1
   0   7   9  826.14 339.654   1
   0  -7 -10  31243. 1459.26   1
   0  -7 -10  31123. 1390.54   1
   0   7  10  35760. 1367.25   1
   0   7  10  35520. 1544.12   1
   0  -7 -11 1520.84 380.773   1
   0  -7 -11 1433.72 416.072   1
   0   7  11 2386.78 439.729   1
   0   7  11 1926.40 263.800   1
   0  -7 -12 3028.16 456.252   1
   0   7  12 2748.03 298.498   1
   0  -7 -13  10834. 823.131   1
   0  -7 -13  10473. 738.640   1
   0   7  13 9571.90 538.114   1
   0   7  13  10398. 763.048   1
   0  -7 -14  67518. 2659.40   1
   0  -7 -14  68081. 2586.55   1
   0   7  14  72850. 2518.96   1
   0   7  14  77018. 2876.83   1
   0  -7 -15 2390.16 457.378   1
   0  -7 -15 1652.27 495.681   1
   0  -7 -16  13222. 949.304   1
   0  -7 -16  14093. 892.977   1
   0   7  16  15073. 718.738   1
   0   7  16  14927. 924.520   1
   0  -7 -17 5508.82 710.476   1
   0   7  17 4990.61 573.788   1
   0  -7 -18  14754. 1045.81   1
   0  -7 -18  14390. 924.520   1
   0   7  18  15817. 738.640  -1
   0   7  18  14608. 950.806   1
   0  -7 -19 1191.51 388.284   1
   0   7  19  782.20 206.947   1
   0  -7 -20  45362. 1937.29   1
   0   7  20  45287. 1653.40   1
   0  -7 -21 4600.07 587.307   1
   0   7  21 4273.37 350.619   1
   0  -7 -22 1747.28 484.040   1
   0   7  22 1748.40 247.878   1
   0  -7 -23   65.53 422.080   1
   0   7  23  -72.10 416.823   1
   0   7  23   25.81 159.782   1
   0  -7 -24 9707.09 819.000   1
   0   7  24  11851. 865.940   1
   0   7  24  10379. 548.253   1
   0  -7 -25  -60.35 399.549   1
   0   7  25 -273.38 369.132   1
   0   7  25  264.18 163.011   1
   0  -7 -26  16388. 1081.49   1
   0   7  26  15006. 689.447   1
   0   7  26  15742. 988.358   1
   0   7  27  155.39 382.275   1
   0  -7 -28   38.27 411.941   1
   0   7  28  310.85 162.185   1
   0   7  28  -93.65 385.279   1
   0   7  29 -297.03 160.045   1
   0  -7 -30 7855.79 794.216   1
   0   7  30  12283. 636.875   1
   0  -8   0  54412. 2089.37   1
   0  -8   0  54262. 2013.89  -1
   0   8   0  60421. 2069.84   1
   0   8   0  58656. 2168.98   1
   0  -8   1 6751.78 563.274   1
   0  -8   1 5843.03 476.905   1
   0  -8  -1 5734.13 492.677   1
   0   8   1 6654.14 410.063   1
   0   8  -1 6763.04 520.841   1
   0   8  -1 6582.80 387.157   1
   0  -8   2  13688. 772.812   1
   0  -8  -2  13624. 762.297   1
   0  -8  -2  13703. 844.535   1
   0   8   2  16158. 867.817   1
   0   8   2  16192. 715.733   1
   0   8  -2  14431. 747.652   1
   0  -8   3 7288.77 547.878   1
   0  -8   3 6248.59 457.003   1
   0  -8  -3 7281.25 646.263   1
   0  -8  -3 6346.22 535.486   1
   0   8   3 6248.59 548.253   1
   0   8   3 6361.24 408.937   1
   0   8  -3 6642.88 376.267   1
   0   8  -3 6004.50 451.370   1
   0  -8   4  20548. 948.178   1
   0  -8   4  22441. 938.414   1
   0  -8  -4  21205. 1034.17   1
   0  -8  -4  21712. 1121.29   1
   0   8   4  22385. 923.018   1
   0   8   4  22253. 1082.24   1
   0   8  -4  21893. 827.262   1
   0   8  -4  20668. 911.753   1
   0  -8   5  13838. 719.864   1
   0  -8   5  13489. 633.871   1
   0  -8  -5  13271. 859.932   1
   0  -8  -5  12937. 790.086   1
   0   8   5  14367. 681.561   1
   0   8   5  14574. 841.907   1
   0   8  -5  13609. 553.886   1
   0   8  -5  13053. 654.149   1
   0  -8   6  46789. 1622.60   1
   0  -8   6  41532. 1523.47   1
   0  -8  -6  42095. 1799.85  -1
   0  -8  -6  47202. 1879.83   1
   0   8   6  51671. 2026.66  -1
   0   8   6  52159. 1862.56   1
   0   8  -6  52234. 1716.86   1
   0   8  -6  49268. 1740.52   1
   0  -8   7  13962. 596.695   1
   0  -8  -7  14183. 929.778   1
   0   8   7  14337. 858.430   1
   0   8  -7  14991. 552.760   1
   0  -8   8 3619.60 272.625   1
   0  -8   8 3931.65 312.730   1
   0  -8  -8 3766.43 564.025  -1
   0  -8  -8 3800.22 485.542   1
   0   8   8 4258.35 498.685   1
   0   8   8 4483.66 362.861   1
   0   8  -8 4622.60 224.333   1
   0   8  -8 4089.37 288.509   1
   0   8   9  18855. 837.025   1
   0   8   9  18122. 996.244   1
   0  -8 -10  20785. 1093.13   1
   0   8  10  24014. 1000.37   1
   0  -8 -11 5152.08 557.266   1
   0  -8 -11 3976.71 572.286   1
   0   8  11 5140.81 551.633   1
   0   8  11 5050.69 390.537   1
   0  -8 -12  16012. 1033.80   1
   0  -8 -12  17706. 994.742  -1
   0   8  12  20297. 1107.02   1
   0   8  12  20237. 885.842   1
   0  -8 -13 9042.42 699.211   1
   0  -8 -13 9624.47 834.396   1
   0   8  13  10368. 803.980   1
   0  -8 -14 -102.07 332.294   1
   0  -8 -14 -424.71 398.798   1
   0   8  14 -286.63 340.293   1
   0   8  14   45.14 182.839   1
   0   8  15  22456. 1206.16   1
   0   8  15  21389. 948.553   1
   0  -8 -16  15295. 942.545   1
   0  -8 -16  16399. 1135.18   1
   0   8  16  17814. 1054.45   1
   0   8  16  17473. 796.845   1
   0  -8 -17 -333.08 352.272   1
   0   8  17   89.03 166.654   1
   0  -8 -18  15190. 1113.40   1
   0  -8 -18  16155. 984.978   1
   0   8  18  16038. 744.648   1
   0   8  18  17349. 1047.69   1
   0  -8 -19 5373.63 611.340   1
   0  -8 -19 5974.46 769.808   1
   0   8  19 5895.60 411.190   1
   0   8  19 6113.40 657.529   1
   0  -8 -20  443.86 368.794   1
   0  -8 -20  903.87 509.951   1
   0   8  20 1189.63 413.443   1
   0   8  20  614.34 205.257   1
   0  -8 -21 6188.50 679.308   1
   0  -8 -21 6624.10 817.123   1
   0   8  21 5306.04 394.292   1
   0  -8 -22  11799. 878.332   1
   0   8  22  12880. 630.116   1
   0  -8 -23 1123.54 443.484   1
   0   8  23 1352.98 219.189   1
   0  -8 -24 9076.22 800.225   1
   0   8  24 9894.85 534.735   1
   0  -8 -26 1260.61 465.264   1
   0   8  26 1509.95 231.844   1
   0  -8 -27 1830.64 506.947   1
   0   8  27 1914.38 261.922   1
   0  -8 -28 9733.38 887.720   1
   0   8  28  13654. 692.076   1
   0  -9   0    0.14 361.622   1
   0  -9   0    3.84 303.192   1
   0   9   0  -91.78 162.110   1
   0   9   0 -259.89 288.960   1
   0  -9   1  29362. 1253.47   1
   0  -9  -1  29226. 1391.29   1
   0  -9  -1  30116. 1315.43   1
   0   9   1  33890. 1268.49   1
   0   9   1  30635. 1351.48   1
   0   9  -1  33458. 1235.07   1
   0  -9   2  428.84 293.691   1
   0  -9   2  124.41 351.220   1
   0  -9  -2  705.97 413.443   1
   0  -9  -2  754.41 339.842   1
   0   9   2  582.43 328.126   1
   0   9   2  930.53 218.963   1
   0   9  -2  975.59 322.944   1
   0   9  -2  638.38 185.843   1
   0  -9   3 1778.82 401.427   1
   0  -9  -3 1313.55 453.999   1
   0  -9  -3 2491.92 410.814   1
   0   9   3  826.89 214.495   1
   0   9   3  914.01 356.290   1
   0   9  -3  859.93 194.743   1
   0   9  -3  678.56 320.165   1
   0  -9   4  13229. 763.799   1
   0  -9  -4  13530. 923.018   1
   0   9   4  17848. 831.392   1
   0   9   4  17018. 957.941   1
   0   9  -4  18025. 877.205   1
   0  -9   5  40330. 1576.04   1
   0  -9   5  40255. 1499.81   1
   0  -9  -5  39767. 1777.69   1
   0  -9  -5  39241. 1656.78   1
   0   9   5  43748. 1608.71   1
   0   9   5  43823. 1814.49   1
   0   9  -5  41682. 1576.42   1
   0   9  -5  44311. 1509.95   1
   0  -9   6   29.26 251.596   1
   0  -9   6   41.31 301.652   1
   0  -9  -6  -64.18 383.026   1
   0  -9  -6  332.03 311.115   1
   0   9   6  -58.69 340.330   1
   0   9   6  254.34 192.152   1
   0   9  -6  274.92 257.454  -1
   0   9  -6  184.08 142.959   1
   0  -9   7  21119. 922.267   1
   0  -9   7  20274. 837.401   1
   0  -9  -7  20372. 1084.87   1
   0   9   7  24638. 1013.14   1
   0   9   7  22261. 1223.06   1
   0   9  -7  21979. 900.487   1
   0   9  -7  22606. 803.229   1
   0  -9   8 4408.56 358.543   1
   0  -9  -8 3429.96 598.197   1
   0  -9  -8 4938.04 548.253   1
   0   9   8 5313.55 590.311   1
   0   9   8 6368.75 434.472   1
   0   9  -8 6410.06 294.405   1
   0  -9   9 6928.27 335.599   1
   0  -9  -9 6639.12 736.762   1
   0  -9  -9 6042.05 596.319   1
   0   9   9 8738.26 512.204   1
   0   9   9 6871.94 644.385   1
   0   9  -9 8024.78 354.374   1
   0  -9 -10 4487.42 671.423   1
   0  -9 -10 5321.06 583.552  -1
   0   9  10 7438.97 477.281   1
   0   9  10 5955.68 611.340   1
   0  -9 -11  23935. 1219.68   1
   0  -9 -11  25764. 1403.30   1
   0   9  11  27886. 1125.80   1
   0   9  11  27615. 1349.23  -1
   0  -9 -12 4213.29 666.165   1
   0   9  12 4637.62 586.180   1
   0  -9 -13  24044. 1410.81   1
   0  -9 -13  20428. 1132.93   1
   0   9  13  23166. 981.974   1
   0   9  13  25148. 1310.93   1
   0  -9 -14 3781.45 702.590   1
   0  -9 -14 4239.58 570.033   1
   0   9  14 6105.89 673.300   1
   0   9  14 6582.80 444.611   1
   0  -9 -15 8880.95 729.252   1
   0  -9 -15 7660.53 888.846   1
   0   9  15  11104. 587.307   1
   0   9  15  10146. 828.013   1
   0  -9 -16 2660.16 638.002   1
   0  -9 -16 2791.59 508.824   1
   0   9  16 2921.51 306.496   1
   0   9  16 3017.65 535.486   1
   0  -9 -17  20552. 1353.36   1
   0  -9 -17  18659. 1084.87   1
   0  -9 -18 1567.78 568.531   1
   0  -9 -18 1211.41 444.611   1
   0   9  18 2076.98 491.926   1
   0   9  18 1217.05 254.525   1
   0  -9 -19  662.41 505.445   1
   0  -9 -19 1189.63 408.561   1
   0   9  19  586.18 205.069   1
   0  -9 -20 1489.67 452.872   1
   0   9  20 1612.47 249.793   1
   0  -9 -21 6954.56 681.561   1
   0  -9 -21 7619.22 884.716   1
   0   9  21 8126.17 477.656   1
   0  -9 -22 -164.25 463.011   1
   0  -9 -22  402.55 384.153   1
   0   9  22  265.64 181.712   1
   0  -9 -23 7671.79 893.728   1
   0  -9 -24  661.66 410.814   1
   0   9  24 1150.58 231.280   1
   0  -9 -25  558.39 378.520   1
   0   9  25  929.78 238.340   1
   0  -9 -26 3460.76 574.164   1
   0   9  26 4175.74 387.532  -1
   0 -10   0  553.89 428.839   1
   0 -10   0  419.08 325.723   1
   0  10   0  359.78 188.246   1
   0  10   0  423.21 364.025   1
   0 -10   1 2627.86 422.455   1
   0 -10   1 3535.86 570.784   1
   0 -10  -1 3292.15 559.519   1
   0 -10  -1 3019.15 461.134   1
   0  10   1 3678.93 335.862   1
   0  10   1 2989.48 474.277   1
   0  10  -1 3433.72 478.407   1
   0  10  -1 3351.86 309.575   1
   0 -10   2 1724.37 402.178   1
   0 -10   2  829.89 438.603   1
   0 -10  -2  159.48 468.644   1
   0  10   2 1366.88 406.684   1
   0  10  -2 1518.21 236.312   1
   0  10  -2  860.68 383.026   1
   0 -10   3  28276. 1233.95   1
   0 -10  -3  30312. 1543.37   1
   0 -10  -3  29358. 1363.50   1
   0  10   3  31900. 1470.52   1
   0  10   3  34611. 1323.69   1
   0  10  -3  33582. 1234.32   1
   0 -10   4  374.69 338.340   1
   0 -10   4  292.26 394.667   1
   0 -10  -4 -268.79 355.388   1
   0 -10  -4  -25.51 463.011   1
   0  10   4  272.02 373.601   1
   0  10   4  215.55 193.879   1
   0  10  -4 -212.84 310.326   1
   0  10  -4  362.00 186.369   1
   0 -10   5  12009. 781.449   1
   0 -10  -5  13290. 862.560   1
   0  10   5  14991. 716.484   1
   0  10  -5  14882. 820.878   1
   0 -10   6   -7.86 325.122   1
   0 -10   6  239.92 360.608   1
   0 -10  -6  569.66 363.349   1
   0 -10  -6  290.91 481.411   1
   0  10   6  696.96 379.647   1
   0  10   6  519.34 204.731   1
   0  10  -6  236.73 168.006   1
   0  10  -6   46.23 306.496   1
   0 -10   7  13631. 689.447   1
   0 -10   7  13489. 742.771   1
   0 -10  -7  13654. 873.075   1
   0 -10  -7  14472. 1054.07   1
   0  10   7  15227. 726.248   1
   0  10   7  14968. 947.802   1
   0  10  -7  14934. 583.552   1
   0  10  -7  15445. 754.036   1
   0 -10   8 -315.66 319.602   1
   0 -10  -8 -268.16 363.650   1
   0 -10  -8  591.06 530.980   1
   0  10   8   88.55 351.896   1
   0  10   8  -12.98 171.273   1
   0  10  -8  246.04 149.042   1
   0 -10   9  30090. 1052.20   1
   0 -10  -9  33590. 1717.23   1
   0 -10  -9  29437. 1426.59   1
   0  10   9  34382. 1336.84   1
   0  10   9  33755. 1567.03   1
   0  10  -9  36470. 1229.44   1
   0 -10 -10  217.50 533.608   1
   0 -10 -10  675.18 426.962   1
   0  10  10  847.16 258.167   1
   0  10  10  677.06 395.043   1
   0 -10 -11  656.03 522.718   1
   0 -10 -11  235.75 363.011   1
   0  10  11  289.49 371.273   1
   0  10  11  569.66 219.827   1
   0 -10 -12  -38.15 355.989   1
   0  10  12  124.30 182.351   1
   0 -10 -13  18156. 1060.83   1
   0 -10 -13  21829. 1377.77   1
   0  10  13  21442. 917.761   1
   0  10  13  21438. 1197.14   1
   0 -10 -14  288.47 351.408   1
   0 -10 -14  279.20 500.563   1
   0  10  14  395.79 401.802   1
   0  10  14  416.82 195.869   1
   0 -10 -15  24739. 1473.52   1
   0 -10 -15  23410. 1239.20   1
   0  10  15  29317. 1454.00   1
   0  10  15  26388. 1077.36   1
   0 -10 -16  207.62 477.656   1
   0  10  16  744.65 432.594   1
   0 -10 -17  557.64 535.861   1
   0 -10 -17  795.72 418.325   1
   0  10  17  519.71 200.976   1
   0 -10 -18  789.33 432.970   1
   0 -10 -18 -117.27 584.678   1
   0  10  18  750.28 211.153   1
   0 -10 -19  19504. 1143.07  -1
   0 -10 -19  18907. 1347.35   1
   0  10  19  22737. 961.321   1
   0 -10 -20  393.54 400.676  -1
   0 -10 -20  498.31 556.515   1
   0  10  20  619.23 208.749   1
   0 -10 -21 5234.69 635.749   1
   0 -10 -21 5242.20 811.490   1
   0  10  21 7258.72 490.048   1
   0 -10 -22 -140.86 343.259   1
   0  10  22  147.09 187.382   1
   0 -10 -23  414.19 351.746   1
   0  10  23  666.17 225.009   1
   0 -10 -24  217.80 461.134   1
   0  10  24 -122.16 251.220   1
   0 -11   0 -220.69 489.673   1
   0  11   0  108.00 399.549   1
   0 -11   1 4036.80 572.286   1
   0 -11   1 4641.38 671.798   1
   0 -11  -1 4126.92 683.815  -1
   0 -11  -1 4209.53 573.413   1
   0  11   1 6522.71 450.244   1
   0  11   1 6507.69 666.165   1
   0  11  -1 6120.91 430.717   1
   0  11  -1 6147.20 658.655   1
   0 -11   2 3758.91 544.498   1
   0 -11   2 2637.62 593.315   1
   0 -11  -2 3453.24 699.586  -1
   0 -11  -2 3288.77 520.090   1
   0  11   2 4081.86 585.805   1
   0  11   2 4205.78 375.065   1
   0  11  -2 4262.11 560.270   1
   0  11  -2 3516.33 336.725   1
   0 -11  -3  251.07 517.461   1
   0 -11  -3  232.67 387.908   1
   0  11   3  382.28 423.582   1
   0  11   3  311.98 205.633   1
   0  11  -3  639.88 226.248   1
   0  11  -3  751.41 405.182   1
   0 -11   4 2524.59 498.310   1
   0 -11  -4 3506.19 680.435   1
   0 -11  -4 2974.46 520.090   1
   0  11   4 3176.49 553.511   1
   0  11   4 2891.85 327.037   1
   0  11  -4 2587.68 289.410   1
   0 -11   5  14747. 847.915   1
   0 -11   5  13658. 894.479   1
   0 -11  -5  12846. 1043.18   1
   0 -11  -5  14345. 944.423   1
   0  11   5  16703. 1033.80   1
   0  11   5  18089. 822.004   1
   0  11  -5  17206. 719.489   1
   0  11  -5  18442. 986.105   1
   0 -11   6  450.24 418.700   1
   0 -11  -6  172.44 520.465   1
   0 -11  -6  360.53 396.920  -1
   0  11   6  913.25 245.325   1
   0  11   6  734.13 432.970   1
   0  11  -6  592.56 399.173   1
   0 -11   7  11296. 750.656   1
   0 -11   7  10319. 657.529   1
   0 -11  -7  11611. 1047.31   1
   0  11   7  13218. 951.557   1
   0  11  -7  14202. 585.429   1
   0  11  -7  14964. 802.102   1
   0 -11   8 3541.49 415.321   1
   0 -11   8 2734.88 422.831   1
   0 -11  -8 3266.24 716.484   1
   0 -11  -8 3021.78 551.257   1
   0  11   8 3961.69 379.271   1
   0  11   8 3856.55 609.838  -1
   0  11  -8 3480.28 407.810   1
   0  11  -8 3638.00 267.330   1
   0 -11  -9  -20.58 559.894   1
   0 -11  -9 1216.30 438.603   1
   0  11   9  699.59 425.835  -1
   0  11   9  881.71 254.712   1
   0 -11 -10 1408.94 602.703   1
   0 -11 -10  916.63 441.982   1
   0  11  10 1253.47 254.675   1
   0  11  10  673.30 437.852   1
   0 -11 -11  14213. 951.557   1
   0 -11 -11  13995. 1141.94   1
   0  11  11  17578. 1109.27   1
   0  11  11  17953. 823.882   1
   0 -11 -12 -163.31 372.061   1
   0 -11 -12  196.43 547.502   1
   0  11  12  927.52 440.105  -1
   0  11  12  -51.97 191.626   1
   0 -11 -13 3048.81 739.015   1
   0  11  13 4055.57 615.846   1
   0 -11 -14 7127.29 695.456   1
   0 -11 -14 7521.58 953.435   1
   0  11  14 9722.11 567.405   1
   0 -11 -15 3304.54 530.604   1
   0  11  15 3957.94 370.221   1
   0 -11 -16  775.06 564.025   1
   0 -11 -16  565.15 373.263   1
   0  11  16  143.30 176.643   1
   0 -11 -17  10556. 1018.02   1
   0 -11 -17  12486. 875.328   1
   0  11  17  18697. 846.789   1
   0 -11 -18  282.16 519.339  -1
   0 -11 -19  377.02 389.410   1
   0 -11 -19 -136.09 537.363   1
   0  11  19  180.32 194.292   1
   0 -11 -20  217.84 398.798   1
   0  11  20  256.33 230.454   1
   0 -11 -21 1601.20 465.640   1
   0  11  21 1544.12 281.261   1
   0 -12   0 7882.08 755.914   1
   0  12   0  10507. 589.185   1
   0  12   0 9515.57 856.552   1
   0 -12   1  771.69 587.682   1
   0 -12   1  215.55 453.248   1
   0 -12  -1  300.79 583.176   1
   0 -12  -1 -410.06 418.325   1
   0  12   1  375.52 478.032   1
   0  12   1  292.04 218.137  -1
   0  12  -1  -97.67 447.240   1
   0  12  -1  101.39 227.375   1
   0 -12   2 2358.24 684.566   1
   0 -12  -2 1711.60 535.486   1
   0 -12  -2 3116.78 780.322   1
   0  12   2 2874.20 344.198   1
   0  12   2 3576.79 622.981   1
   0  12  -2 3180.24 590.311   1
   0  12  -2 2413.44 355.726   1
   0 -12   3 5647.76 764.175   1
   0 -12   3 6075.85 695.456   1
   0 -12  -3 6695.45 739.766   1
   0 -12  -3 6672.92 927.900   1
   0  12   3 8693.20 840.029   1
   0  12   3 9988.72 599.699   1
   0  12  -3 9192.63 537.739   1
   0  12  -3  10360. 868.944   1
   0 -12   4  463.39 515.583   1
   0 -12   4 -230.64 542.621   1
   0 -12  -4 1067.22 466.391   1
   0 -12  -4  585.43 660.908   1
   0  12   4  311.42 236.162   1
   0  12   4  511.08 449.117   1
   0  12  -4 -278.93 521.216  -1
   0  12  -4  725.87 245.362   1
   0 -12   5  933.16 492.301  -1
   0 -12  -5 1401.43 695.456   1
   0 -12  -5  444.99 442.733   1
   0  12   5 1211.41 544.874   1
   0  12   5  864.81 294.367   1
   0  12  -5 1269.99 259.031   1
   0 -12   6 8715.73 758.542   1
   0 -12   6 9586.92 862.560   1
   0 -12  -6 8159.96 986.856   1
   0 -12  -6 8494.17 785.955  -1
   0  12   6 8730.75 591.438   1
   0  12   6  10492. 958.692   1
   0  12  -6  10860. 826.886   1
   0  12  -6  10469. 524.220   1
   0 -12   7  793.84 510.326   1
   0 -12   7 1152.08 532.482   1
   0 -12  -7  381.15 757.040   1
   0 -12  -7 1640.63 520.090   1
   0  12   7 2783.32 344.836   1
   0  12  -7 2947.42 314.194   1
   0  12  -7 2427.71 502.065   1
   0 -12   8  250.81 431.468   1
   0 -12  -8  329.21 443.860   1
   0 -12  -8  633.12 656.026   1
   0  12   8  526.85 244.348   1
   0  12   8  671.05 480.285   1
   0  12  -8  942.55 256.440   1
   0 -12  -9 3788.96 852.797   1
   0 -12  -9 4006.76 625.610   1
   0  12   9 7142.31 764.926   1
   0  12   9 7671.79 515.208   1
   0 -12 -10 2273.00 546.000   1
   0 -12 -10 2344.72 776.567   1
   0  12  10 2734.88 612.091   1
   0  12  10 2939.16 370.784   1
   0 -12 -11 -162.64 598.948   1
   0 -12 -11  378.90 393.916   1
   0  12  11   84.27 223.056   1
   0  12  11 -497.93 419.076  -1
   0 -12 -12 5114.53 633.120   1
   0  12  12 7138.56 500.563   1
   0 -12 -13 1865.94 468.268   1
   0 -12 -13 1740.89 713.856   1
   0  12  13 2725.87 349.530   1
   0 -12 -14  512.95 397.671   1
   0 -12 -14  599.70 650.018   1
   0  12  14  461.51 241.645   1
   0 -12 -15 2298.53 719.113   1
   0 -12 -15 2301.54 547.127   1
   0  12  15 3696.20 410.063   1
   0 -12 -16 3856.55 781.824   1
   0 -12 -16 4325.94 628.238   1
   0  12  16 5332.33 444.235   1
   0 -12 -17 -158.77 385.655   1
   0  12  17   28.67 214.532   1
   0 -12 -18 2681.94 506.196   1
   0  12  18 3645.88 413.068   1
   0 -13   0  555.76 670.672   1
   0 -13   0 -477.66 510.702   1
   0  13   0  427.71 573.037   1
   0  13   0  148.63 265.903   1
   0 -13   1  379.65 552.008   1
   0 -13   1  -59.78 559.894   1
   0 -13  -1  814.87 699.586   1
   0 -13  -1  485.92 518.963   1
   0  13   1  181.79 513.330   1
   0  13   1  247.54 287.157   1
   0  13  -1  390.91 298.685   1
   0 -13   2 3965.45 727.374   1
   0 -13   2 3822.75 768.681   1
   0 -13  -2 3479.91 843.409   1
   0  13   2 6541.49 802.102   1
   0  13  -2 5369.88 786.706   1
   0  13  -2 4641.38 469.019   1
   0 -13   3   21.30 595.568   1
   0 -13  -3 -597.82 706.346   1
   0 -13  -3 -157.42 480.285   1
   0  13   3 -275.70 535.486   1
   0  13   3  -70.78 255.501   1
   0  13  -3  353.89 602.328   1
   0 -13   4 4126.92 748.779  -1
   0 -13   4 4100.63 776.943   1
   0 -13  -4 3747.27 647.765   1
   0  13   4 5670.29 502.440   1
   0  13  -4 5880.58 491.175   1
   0  13  -4 8475.40 904.618   1
   0 -13   5 -184.45 608.711   1
   0 -13   5  492.30 674.427   1
   0 -13  -5  843.03 478.407   1
   0 -13  -5  597.82 690.198   1
   0  13   5 1111.53 295.944   1
   0  13   5  815.62 558.768   1
   0  13  -5 1449.12 650.018   1
   0  13  -5  856.93 308.449   1
   0 -13   6  320.05 570.409  -1
   0 -13   6 -235.56 689.447   1
   0 -13  -6  -45.06 668.043   1
   0 -13  -6  363.35 448.742   1
   0  13   6  235.41 269.095   1
   0  13   6  168.16 509.575   1
   0  13  -6 -483.66 579.421   1
   0  13  -6   58.36 271.648   1
   0 -13   7  511.08 594.817   1
   0 -13   7   65.68 529.853  -1
   0 -13  -7  440.10 728.877   1
   0 -13  -7 -221.14 434.472  -1
   0  13   7  819.00 522.718   1
   0  13   7  191.33 260.458   1
   0 -13  -8 4085.61 860.307   1
   0 -13  -8 3600.82 647.765   1
   0  13   8 6237.32 816.747   1
   0  13   8 5914.38 565.152   1
   0 -13  -9  395.04 423.582   1
   0 -13  -9  -20.21 598.197   1
   0  13   9   24.56 268.494   1
   0 -13 -10 2357.86 747.652   1
   0 -13 -10 2455.87 533.233   1
   0  13  10 5418.70 498.310   1
   0  13  11 1018.40 316.522   1
   0 -13 -12  108.82 404.055   1
   0 -13 -12  -45.96 660.908   1
   0  13  12    0.22 246.001   1
   0 -13 -13 -248.44 654.149   1
   0 -13 -13  127.41 359.068   1
   0  13  13  -13.07 244.498   1
   0 -13 -14 4318.43 584.303   1
   0  13  14 7318.81 579.421   1
   0 -13 -15 -345.78 383.026   1
   0  13  16  558.39 332.144   1
   0 -14   0  173.98 691.700   1
   0  14   0 2040.18 721.366   1
   0  14   0 1222.30 491.926   1
   0 -14   1  734.51 743.146   1
   0 -14   1  316.18 544.498   1
   0 -14  -1  818.25 526.098   1
   0 -14  -1  952.68 764.926   1
   0  14   1  808.49 355.876   1
   0  14   1 1226.81 621.103   1
   0 -14   2  747.65 737.513   1
   0 -14   2  324.90 552.384   1
   0 -14  -2  860.68 823.131   1
   0 -14  -2  873.45 500.187   1
   0  14   2 1888.09 413.819   1
   0 -14  -3  -58.39 482.914   1
   0 -14  -3  595.19 677.431   1
   0  14   3   64.66 329.102   1
   0  14   3 -304.54 592.189   1
   0 -14  -4  307.25 648.141   1
   0 -14  -4  428.09 481.036   1
   0  14   4 1904.24 580.172   1
   0  14   4 1591.44 393.165   1
   0 -14  -5 -133.35 734.509   1
   0  14   5  106.16 479.909   1
   0 -14  -6 2328.95 521.216   1
   0 -14  -6 2707.47 794.592   1
   0  14   6 6793.08 624.483   1
   0 -14  -7  193.80 582.050   1
   0 -14  -7   19.00 386.406   1
   0  14   7  307.06 360.983   1
   0 -14  -8   69.21 338.077   1
   0 -14  -8  678.18 535.861  -1
   0  14   8 1084.49 417.949   1
   0 -14  -9 -129.10 517.461   1
   0 -14  -9 -135.67 357.303   1
   0  14   9 -128.76 353.361   1
   0 -14 -10  719.86 397.296   1
   0 -14 -10 1487.04 568.156   1
   0  14  10 2900.49 493.803   1
   0 -14 -11  110.89 340.293   1
   0  14  11 -115.77 368.231   1
   0 -14 -12 1628.61 434.096   1
   0  14  12 5088.24 570.409   1
   1   0 -37  503.57 478.407   1
  -1   0  37 -257.04 373.225   1
  -1   0  37  395.42 333.383   1
   1   0 -36  10255. 1011.64   1
  -1   0  36 8171.23 844.911   1
   1   0 -35  473.15 597.446   1
  -1   0  35  -83.06 475.779   1
   1   0 -34  371.24 583.176   1
   1   0 -34  798.72 589.936   1
  -1   0  34  365.94 218.475   1
  -1   0  34  255.99 482.538   1
   1   0 -33  -94.29 604.205   1
   1   0 -33  141.16 557.641   1
  -1   0  33 -171.84 426.586   1
  -1   0  33   59.33 190.950   1
   1   0 -32 5576.41 770.934   1
  -1   0  32 6102.13 436.725  -1
   1   0 -31  399.55 547.127   1
   1   0 -31 -323.24 505.820   1
  -1   0  31  347.50 443.109   1
  -1   0  31   63.35 183.440   1
   1   0 -30  10973. 1012.39   1
   1   0 -30  12523. 976.342   1
   1   0 -29   19.72 435.974   1
   1   0 -29 -305.18 425.460   1
  -1   0  29   65.75 174.127   1
  -1   0  29  -91.89 418.325   1
   1   0 -28 -204.21 408.937   1
   1   0 -28  558.77 422.831  -1
  -1   0  28   94.07 169.808   1
  -1   0  28 -275.74 383.402   1
   1   0 -27 -555.01 383.026   1
   1   0 -27   98.72 391.663   1
  -1   0  27  457.00 390.537   1
  -1   0  27   88.51 170.785   1
   1   0 -26  25498. 1302.29   1
  -1   0  26  26192. 1045.44   1
   1   0 -25   85.28 341.231   1
   1   0 -25  -38.42 396.920   1
  -1   0  25  113.74 170.071   1
  -1   0  25  110.51 340.781   1
   1   0 -24  39504. 1704.84   1
  -1   0  24  40593. 1686.82   1
   1   0 -23 -382.28 334.097   1
   1   0 -23  -28.93 349.192   1
  -1   0  23 -212.05 356.252   1
  -1   0  23   94.78 163.500   1
   1   0 -22  910.25 370.634   1
  -1   0  22 1231.32 219.790   1
   1   0 -21   39.20 303.004   1
   1   0 -21 -152.80 291.250   1
  -1   0  21 -137.48 343.146   1
  -1   0  21  -23.87 140.330   1
   1   0 -20  40218. 1633.12   1
   1   0 -20  41157. 1665.04  -1
  -1   0  20  40556. 1469.02   1
  -1   0  20  42884. 1693.58   1
   1   0 -19 -171.84 284.566   1
   1   0 -19 -222.01 242.959   1
  -1   0  19 -211.68 147.014   1
  -1   0  19  122.68 271.348   1
   1   0 -18  30120. 1288.40   1
  -1   0  18  30830. 1168.23   1
   1   0 -17  137.70 235.486   1
   1   0 -17  148.22 252.797   1
  -1   0  17   11.22 228.952   1
  -1   0  17   12.38 141.682   1
   1   0 -16  675.93 264.701   1
   1   0 -16  311.04 240.368   1
  -1   0  16  305.90 162.636   1
  -1   0  16  239.35 236.425   1
   1   0 -15  133.38 237.889   1
  -1   0  15  251.22 213.256   1
   1   0 -14 334359.  10586.   1
   1   0 -14 341644.  10819.   1
  -1   0  14 336275.  10635.  -1
  -1   0  14 333421.  10469.   1
   1   0 -13  216.82 231.543   1
   1   0 -13   74.65 196.057   1
  -1   0  13   75.37 127.337   1
  -1   0  13  153.74 186.031   1
   1   0 -12  67668. 2327.07   1
   1   0 -12  66166. 2281.26   1
  -1   0  12  68719. 2353.36   1
  -1   0  12  67781. 2257.98   1
   1   0 -11  200.94 166.654   1
   1   0 -11  -89.64 167.856   1
  -1   0  11  261.62 165.189   1
  -1   0  11   75.78 119.189   1
   1   0 -10  14780. 643.634   1
   1   0 -10  15546. 666.916   1
  -1   0  10  14371. 634.997   1
   1   0  -9  160.98 135.298   1
   1   0  -9  197.56 151.183  -1
  -1   0   9   99.66  98.573   1
  -1   0   9   -2.28 134.622   1
   1   0  -8 604956.  18817.   1
  -1   0   8 624483.  19380.   1
   1   0  -7  221.14  93.954   1
   1   0  -7  342.43 122.681   1
  -1   0   7  197.30  96.583   1
  -1   0   7  262.15 117.499   1
   1   0  -6 110176. 3492.30   1
   1   0  -6 106647. 3402.55   1
  -1   0   6 107285. 3426.96   1
  -1   0   6 111641. 3536.61   1
   1   0  -5  377.39  80.698   1
   1   0  -5  302.59  93.992   1
  -1   0   5  255.05  79.572   1
  -1   0   5  564.03 102.816   1
   1   0  -4 104431. 3286.14   1
  -1   0   4 111303. 3511.83   1
   1   0  -3  130.30  46.977   1
   1   0  -3   81.37  52.122   1
  -1   0   3   65.34  45.137   1
  -1   0   3  123.69  55.877   1
   1   0  -2 613969.  18964.   1
   1   0  -2 684566.  21142.  -1
  -1   0   2 667667.  20631.   1
  -1   0   2 650018.  20075.   1
   1   0  -1  196.92  35.783   1
   1   0  -1  126.40  26.335   1
  -1   0   1  111.57  26.804   1
   1   0   0  37814. 1190.39   1
  -1   0   0  41006. 1291.40   1
  -1   0   0  36294. 1146.07   1
   1   0   1  170.86  39.204   1
  -1   0  -1  145.40  38.077   1
   1   0   2 6503.94 253.248   1
  -1   0  -2 6631.61 251.145   1
   1   0   3  148.52  73.413   1
  -1   0  -3  -27.84  62.223   1
   1   0   4 150807. 4742.77   1
   1   0   4 149530. 4693.95   1
  -1   0  -4 152347. 4780.32   1
  -1   0  -4 141419. 4461.13   1
   1   0   5   88.40  97.747  -1
   1   0   5   37.49  98.197   1
  -1   0  -5   63.05  89.485   1
  -1   0  -5  173.60 100.300   1
   1   0   6  21513. 789.710   1
   1   0   6  20807. 772.812   1
  -1   0  -6  20158. 734.134   1
  -1   0  -6  19865. 746.150   1
   1   0   7    5.60 120.991   1
  -1   0  -7  148.40 121.292   1
   1   0   8 267104. 8404.05   1
   1   0   8 253323. 7972.20   1
  -1   0  -8 261998. 8227.56   1
  -1   0  -8 267029. 8411.56   1
   1   0   9  193.09 154.487   1
   1   0   9  115.58 158.806   1
  -1   0  -9  167.07 137.589   1
  -1   0  -9  113.29 136.763   1
   1   0  10  73413. 2468.27   1
   1   0  10  77732. 2609.84   1
  -1   0 -10  74202. 2506.19   1
  -1   0 -10  75141. 2503.94   1
   1   0  11  -29.63 188.171   1
   1   0  11   44.01 157.003   1
  -1   0 -11   48.52 167.555   1
  -1   0 -11 -148.18 167.180   1
   1   0  12 105783. 3526.47   1
   1   0  12 105332. 3478.78   1
  -1   0 -12 104731. 3453.24   1
  -1   0 -12 106008. 3533.61   1
   1   0  13  120.92 180.173   1
  -1   0 -13  270.90 210.214   1
  -1   0 -13   57.60 191.325   1
   1   0  14 197334. 6353.73   1
  -1   0 -14 190950. 6154.71   1
   1   0  15   50.32 138.866   1
   1   0  15  333.87 227.675   1
  -1   0 -15   94.37 231.168   1
  -1   0 -15 -360.80 228.426   1
   1   0  16  79910. 2769.81   1
   1   0  16  83102. 2779.57   1
  -1   0 -16  84454. 2905.74   1
  -1   0 -16  83928. 2936.16  -1
   1   0  17  160.42 161.810   1
  -1   0 -17 -121.22 244.048   1
   1   0  18   22.85 159.181   1
   1   0  18   36.11 276.905  -1
  -1   0 -18  400.30 266.654   1
  -1   0 -18  308.37 280.510   1
   1   0  19  -32.39 154.750   1
   1   0  19 -333.46 246.639   1
  -1   0 -19   12.48 278.445   1
  -1   0 -19 -192.98 256.064   1
   1   0  20  50620. 1795.34   1
   1   0  20  52873. 1992.11   1
  -1   0 -20  52760. 2043.18   1
  -1   0 -20  53473. 2013.89   1
   1   0  21 -242.85 302.178   1
   1   0  21  -60.16 142.959   1
  -1   0 -21  337.55 299.211   1
  -1   0 -21 -350.66 316.710   1
   1   0  22  44724. 1778.44   1
   1   0  22  42734. 1553.13   1
  -1   0 -22  44236. 1770.93  -1
  -1   0 -22  42771. 1803.60   1
   1   0  23 -121.44 330.041   1
   1   0  23   85.92 170.334   1
  -1   0 -23  264.55 316.710   1
   1   0  24  12606. 605.332   1
  -1   0 -24  10751. 776.192   1
   1   0  25 -246.11 162.110   1
  -1   0 -25 -373.45 356.440   1
   1   0  26  46752. 1680.81   1
   1   0  26  49380. 1962.45   1
  -1   0 -26  50206. 2050.69   1
  -1   0 -26  46902. 1993.99   1
   1   0  27  159.56 158.505   1
   1   0  27 -138.94 344.949   1
  -1   0 -27  106.42 379.647   1
  -1   0 -27  341.16 403.304   1
   1   0  28  16568. 743.146   1
   1   0  28  17792. 1000.37   1
  -1   0 -28  16305. 1070.60   1
  -1   0 -28  17826. 1070.97   1
   1   0  29  436.73 422.831   1
  -1   0 -29   82.28 399.549   1
  -1   0 -29 -297.86 449.868   1
   1   0  30  14987. 701.839   1
   1   0  30  15652. 988.358   1
  -1   0 -30  13368. 1063.09   1
  -1   0 -30  13181. 1000.75   1
   1   0  31  167.18 168.381   1
  -1   0 -31  104.51 541.119   1
   1   0  32  18810. 1090.12   1
   1   0  32  16091. 740.142  -1
  -1   0 -32  14476. 1090.12   1
  -1   0 -32  15704. 1149.08   1
   1   0  33  -88.21 446.113   1
   1   0  33  -30.82 188.096   1
  -1   0 -33  432.97 533.233   1
  -1   0 -33 -393.54 443.484   1
   1   0  34 1695.83 571.911   1
  -1   0 -34  413.44 582.425   1
   1   0  35 -248.93 389.410   1
   1   0  35  158.77 201.014   1
  -1   0 -35  303.64 574.164   1
   1   0  37 -359.29 356.477   1
   1   0  37  140.56 377.769   1
  -1   0 -37 -423.96 433.721   1
  -1  -1  37  224.26 452.497  -1
  -1  -1  37 1719.11 458.881   1
  -1   1  37  583.55 386.781   1
  -1   1  37 1945.55 447.991   1
   1  -1 -36  -17.74 512.204   1
  -1  -1  36 -470.52 401.427   1
  -1  -1  36 -333.68 255.163   1
   1   1 -36 -461.88 577.168   1
   1   1 -36  261.43 582.050   1
  -1   1  36   15.11 348.854   1
  -1   1  36  109.73 240.781   1
   1  -1 -35 1312.80 584.303   1
  -1  -1  35  986.10 298.723   1
  -1  -1  35 1407.81 476.905   1
   1   1 -35 1094.25 651.145   1
   1   1 -35  737.51 676.304   1
  -1   1  35  959.44 486.293   1
  -1   1  35 1571.91 276.755   1
   1  -1 -34  15111. 1224.56   1
  -1  -1  34  16143. 779.196   1
   1   1 -34  13965. 1176.87   1
  -1   1  34  12430. 931.280   1
   1  -1 -33  759.67 553.886   1
   1  -1 -33  267.93 559.519   1
  -1  -1  33  223.09 515.959   1
  -1  -1  33  178.97 209.125   1
   1   1 -33   78.18 565.527   1
   1   1 -33  306.50 580.172   1
  -1  -1  32 3101.76 607.209   1
  -1   1  32 3705.59 609.462   1
  -1   1  32 3487.42 335.749   1
   1  -1 -31 2689.82 650.018   1
   1  -1 -31 3054.45 639.504   1
  -1  -1  31 3584.68 330.304   1
  -1  -1  31 3559.89 585.429   1
   1   1 -31 3149.83 654.149   1
   1   1 -31 3512.95 701.088  -1
  -1   1  31 3054.45 569.658   1
  -1   1  31 2970.71 297.258   1
   1  -1 -30 1484.04 524.220   1
   1  -1 -30 1003.00 572.662   1
  -1  -1  30  853.92 219.264  -1
  -1  -1  30  828.39 459.632   1
   1   1 -30 1586.56 611.340   1
   1   1 -30  865.19 533.984   1
  -1   1  30  829.14 458.881   1
  -1   1  30  870.45 212.918   1
   1  -1 -29 2415.69 607.209   1
   1  -1 -29 2350.73 564.776   1
  -1  -1  29 2157.34 274.352   1
  -1  -1  29 1705.97 473.901   1
  -1   1  29 2300.79 468.268   1
  -1   1  29 2745.40 293.879   1
   1  -1 -28  26981. 1413.82  -1
   1  -1 -28  26128. 1440.10   1
  -1  -1  28  26128. 1035.67   1
   1   1 -28  26087. 1349.60   1
  -1   1  28  24112. 1222.30   1
  -1   1  28  26327. 1061.96   1
   1  -1 -27 1638.38 527.975   1
   1  -1 -27 1682.31 484.040   1
  -1  -1  27 1316.56 434.096   1
  -1  -1  27 1807.73 246.714   1
   1   1 -27 1406.68 458.129   1
   1   1 -27 2001.88 484.791   1
  -1   1  27 2071.72 269.170   1
  -1   1  27 1727.00 476.154   1
   1  -1 -26 3581.67 568.156   1
   1  -1 -26 2304.17 512.204   1
  -1  -1  26 4078.10 350.995   1
  -1  -1  26 4066.84 527.975   1
   1   1 -26 3382.65 514.832   1
  -1   1  26 4138.19 336.500   1
  -1   1  26 3830.26 545.625   1
   1  -1 -25 4217.04 589.560   1
   1  -1 -25 4156.96 606.458   1
  -1  -1  25 4498.68 337.288   1
  -1  -1  25 4359.74 531.355   1
   1   1 -25 3675.18 506.196   1
   1   1 -25 4190.76 544.123   1
  -1   1  25 4836.65 358.092   1
  -1   1  25 4930.52 567.405   1
   1  -1 -24 3237.32 541.494   1
   1  -1 -24 3563.27 507.698   1
  -1  -1  24 2825.01 442.358   1
  -1  -1  24 3589.93 305.407   1
   1   1 -24 3785.20 493.052   1
   1   1 -24 2610.96 469.771   1
  -1   1  24 3271.12 305.257   1
  -1   1  24 2946.67 482.914   1
   1  -1 -23  10195. 748.028   1
   1  -1 -23  10056. 769.057   1
  -1  -1  23  10740. 710.476   1
  -1  -1  23  11382. 558.017   1
   1   1 -23  10586. 722.868  -1
   1   1 -23  10330. 720.991   1
  -1   1  23  10473. 546.751   1
  -1   1  23  11389. 761.546   1
   1  -1 -22  43522. 1818.62   1
  -1  -1  22  46789. 1657.53   1
  -1  -1  22  44686. 1745.02   1
   1   1 -22  44048. 1755.91   1
   1   1 -22  44837. 1787.46   1
  -1   1  22  45325. 1823.13   1
   1  -1 -21 3901.61 509.575   1
   1  -1 -21 3036.80 445.362   1
  -1  -1  21 2848.66 273.451   1
  -1  -1  21 2998.87 413.068   1
   1   1 -21 2686.82 412.317   1
   1   1 -21 2670.67 432.970   1
  -1   1  21 2184.00 405.557   1
  -1   1  21 2662.78 271.611   1
   1  -1 -20   35.84 307.247   1
   1  -1 -20  467.89 369.170   1
  -1  -1  20  278.90 157.754   1
   1   1 -20  188.40 271.123   1
  -1   1  20  564.03 190.574   1
  -1   1  20  215.88 341.119   1
   1  -1 -19  22403. 1082.61   1
   1  -1 -19  24131. 1157.72   1
  -1  -1  19  22276. 1000.00   1
  -1  -1  19  22392. 888.095   1
   1   1 -19  23586. 1048.07   1
   1   1 -19  21949. 1013.89   1
  -1   1  19  22880. 943.672   1
  -1   1  19  21776. 1059.71   1
   1  -1 -18  11284. 704.468   1
   1  -1 -18  11048. 706.721   1
  -1  -1  18  11059. 636.875   1
  -1  -1  18  10349. 499.061   1
   1   1 -18  11521. 664.288   1
   1   1 -18  12362. 674.802   1
  -1   1  18  10740. 549.755   1
  -1   1  18  11848. 722.117   1
   1  -1 -17  11250. 685.317   1
   1  -1 -17  11018. 687.570   1
  -1  -1  17  11555. 630.491   1
   1   1 -17  11776. 636.500   1
  -1   1  17  11224. 673.300   1
  -1   1  17  12020. 580.548   1
  -1  -1  16 124822. 4029.29  -1
  -1  -1  16 124709. 4108.15   1
   1   1 -16 122869. 4063.08   1
   1   1 -16 123695. 4104.39   1
  -1   1  16 123620. 4033.04   1
   1  -1 -15  34461. 1397.29   1
   1  -1 -15  35295. 1436.35   1
  -1  -1  15  33049. 1190.01   1
  -1  -1  15  34585. 1312.80   1
   1   1 -15  32261. 1255.35   1
   1   1 -15  35520. 1350.36   1
  -1   1  15  32985. 1225.68   1
  -1   1  15  34191. 1372.14   1
   1  -1 -14  34318. 1366.50   1
   1  -1 -14  34164. 1372.89   1
   1   1 -14  32933. 1249.34   1
   1   1 -14  32967. 1257.60   1
  -1   1  14  33083. 1229.44   1
  -1   1  14  34964. 1385.28   1
   1  -1 -13 6184.75 472.024   1
  -1  -1  13 4866.69 355.125   1
  -1  -1  13 4630.11 280.323   1
   1   1 -13 4716.48 343.898   1
   1   1 -13 5824.25 390.537   1
  -1   1  13 4637.62 396.545   1
   1  -1 -12 157266. 5122.04   1
   1  -1 -12 154262. 5028.16  -1
  -1  -1  12 154037. 4889.22   1
  -1  -1  12 157679. 5058.20   1
   1   1 -12 160646. 5152.08   1
   1   1 -12 154637. 4960.57  -1
  -1   1  12 159331. 5182.12   1
  -1   1  12 151859. 4877.95   1
   1  -1 -11  886.97 214.758   1
   1  -1 -11 1036.05 235.674   1
  -1  -1  11  603.45 126.173   1
  -1  -1  11  291.55 142.621   1
   1   1 -11  628.61 177.657   1
   1   1 -11  955.31 194.330   1
  -1   1  11  363.54 149.230   1
  -1   1  11  831.02 212.955   1
   1  -1 -10 272362. 8633.11   1
   1  -1 -10 265527. 8415.31   1
  -1  -1  10 280097. 8753.28   1
   1   1 -10 278670. 8753.28   1
  -1   1  10 276004. 8745.77   1
  -1   1  10 275892. 8681.93   1
  -1  -1   9 9316.55 389.786   1
  -1  -1   9 9263.98 420.578   1
   1   1  -9  10819. 472.024   1
   1   1  -9 9508.06 427.713   1
  -1   1   9  11194. 547.502   1
  -1   1   9 9677.05 450.619  -1
   1  -1  -8  58505. 1994.37   1
   1  -1  -8  59369. 1981.97  -1
  -1  -1   8  57266. 1882.84   1
  -1  -1   8  58243. 1884.71   1
   1   1  -8  57078. 1871.95   1
   1   1  -8  56252. 1843.78  -1
  -1   1   8  57191. 1958.69  -1
  -1   1   8  59444. 1980.10   1
   1  -1  -7  52722. 1800.60   1
   1  -1  -7  52234. 1758.17   1
  -1  -1   7  50582. 1633.87   1
  -1  -1   7  53586. 1749.15  -1
   1   1  -7  56740. 1840.78   1
   1   1  -7  52047. 1696.21   1
  -1   1   7  50657. 1702.21   1
  -1   1   7  53136. 1818.62   1
   1  -1  -6 600074.  18663.   1
  -1  -1   6 594442.  18419.   1
   1   1  -6 647765.  20053.   1
  -1   1   6 615095.  19095.   1
   1  -1  -5 4378.52 240.180   1
  -1  -1   5 4386.03 193.804   1
  -1  -1   5 4382.27 182.351   1
   1   1  -5 4070.59 175.103   1
   1   1  -5 4401.05 191.100   1
  -1   1   5 4269.62 234.622  -1
   1  -1  -4 277807. 8659.40   1
   1  -1  -4 297334. 9282.75   1
  -1  -1   4 290837. 9008.63   1
  -1  -1   4 292339. 9061.20   1
   1   1  -4 295306. 9147.57   1
   1   1  -4 296357. 9181.37  -1
  -1   1   4 285129. 8884.71   1
   1  -1  -3 3785.20 211.303   1
  -1  -1   3 3385.65 128.464   1
   1   1  -3 2097.63  85.843   1
  -1   1   3 2208.41 146.789   1
   1  -1  -2  14608. 529.853   1
  -1  -1   2  14029. 452.497   1
  -1  -1   2  13826. 443.484   1
   1   1  -2  14570. 467.893   1
   1   1  -2  13500. 433.721   1
  -1   1   2  14138. 502.816   1
  -1   1   2  15051. 547.502  -1
   1  -1  -1  81074. 2559.52   1
  -1  -1   1  84303. 2636.12   1
  -1  -1   1  88509. 2758.92   1
   1   1  -1  89748. 2800.22   1
   1   1  -1  85918. 2681.18   1
  -1   1   1  85580. 2702.96   1
   1  -1   0 653773.  20207.   1
   1  -1   0 636875.  19685.   1
  -1  -1   0 678182.  20961.   1
  -1  -1   0 657904.  20342.   1
   1   1   0 659406.  20387.   1
   1   1   0 660533.  20417.   1
  -1   1   0 640630.  19801.   1
  -1   1   0 628614.  19418.   1
   1  -1   1  62861. 1969.58   1
   1  -1   1  64514. 2025.91   1
  -1  -1  -1  65490. 2088.62   1
   1   1   1  62073. 1986.48   1
  -1   1  -1  61735. 1933.91   1
  -1   1  -1  61434. 1932.41   1
   1  -1   2 110477. 3438.22   1
   1  -1   2 112955. 3514.83   1
  -1  -1  -2 111829. 3541.12   1
   1   1   2 118851. 3758.91   1
   1   1   2 116185. 3665.79   1
  -1   1  -2 108674. 3382.27   1
  -1   1  -2 115584. 3599.32   1
   1  -1   3  68870. 2162.97   1
   1  -1   3  66767. 2095.38   1
  -1  -1  -3  70822. 2292.15   1
  -1  -1  -3  65678. 2138.94   1
   1   1   3  65640. 2150.96   1
   1   1   3  72062. 2324.44   1
  -1   1  -3  68832. 2161.47   1
  -1   1  -3  69208. 2177.24   1
   1  -1   4  63612. 2013.89   1
  -1  -1  -4  57980. 1921.14   1
  -1  -1  -4  58205. 1908.00   1
   1   1   4  57341. 1887.72   1
  -1   1  -4  61209. 1935.41   1
   1  -1   5  51483. 1660.16   1
   1  -1   5  49568. 1599.70   1
  -1  -1  -5  49681. 1686.07   1
   1   1   5  49230. 1654.15   1
  -1   1  -5  47766. 1556.14   1
  -1   1  -5  52760. 1692.83   1
   1  -1   6 238077. 7427.71   1
   1  -1   6 233195. 7277.50   1
  -1  -1  -6 229027. 7209.91   1
  -1  -1  -6 234209. 7393.91   1
   1   1   6 231243. 7285.01   1
   1   1   6 236012. 7442.73   1
  -1   1  -6 233346. 7296.28   1
  -1   1  -6 236800. 7378.89   1
   1  -1   7  31040. 1066.84   1
   1  -1   7  30267. 1043.93   1
  -1  -1  -7  30034. 1120.54   1
  -1  -1  -7  30068. 1098.01   1
   1   1   7  29388. 1093.88   1
   1   1   7  29726. 1095.76   1
  -1   1  -7  31356. 1090.87   1
  -1   1  -7  30443. 1033.42   1
   1  -1   8  48704. 1627.11   1
   1  -1   8  52309. 1749.90   1
  -1  -1  -8  49869. 1728.12   1
  -1  -1  -8  47728. 1684.94   1
   1   1   8  47277. 1660.91   1
   1   1   8  50169. 1751.03   1
  -1   1  -8  49380. 1662.78   1
  -1   1  -8  50357. 1666.16   1
   1  -1   9 144499. 4611.34   1
  -1  -1  -9 137965. 4487.42  -1
  -1  -1  -9 139542. 4513.70  -1
   1   1   9 139767. 4532.48   1
   1   1   9 142846. 4630.11   1
  -1   1  -9 141232. 4521.21   1
   1  -1  10  36898. 1303.79   1
   1  -1  10  36252. 1292.90   1
  -1  -1 -10  34153. 1269.24   1
  -1  -1 -10  37146. 1394.67   1
   1   1  10  37544. 1389.41   1
   1   1  10  36121. 1357.49   1
  -1   1 -10  34153. 1194.52   1
  -1   1 -10  37852. 1353.74   1
   1  -1  11 2325.95 263.762   1
  -1  -1 -11 1799.47 262.936   1
  -1  -1 -11 1496.06 251.521   1
   1   1  11 1248.22 233.571   1
   1   1  11  763.80 263.687   1
  -1   1 -11 1646.26 214.307  -1
   1  -1  12 109801. 3590.31   1
   1  -1  12 113218. 3730.00  -1
  -1  -1 -12 109050. 3625.98   1
   1   1  12 108261. 3610.96   1
  -1   1 -12 106421. 3466.39   1
  -1   1 -12 110439. 3637.25   1
   1  -1  13 7900.86 455.125   1
   1  -1  13 7773.18 494.179   1
  -1  -1 -13 7288.77 483.289   1
   1   1  13 7412.69 424.709   1
   1   1  13 6875.70 469.019   1
  -1   1 -13 6977.09 445.362   1
  -1   1 -13 6909.49 405.933   1
  -1  -1 -14  29245. 1199.02   1
  -1  -1 -14  28554. 1205.41   1
   1   1  14  26767. 1128.80   1
   1   1  14  26500. 1031.17   1
  -1   1 -14  29876. 1133.68   1
  -1   1 -14  27698. 1116.78   1
   1  -1  15  62636. 2179.49   1
   1  -1  15  61810. 2092.00   1
  -1  -1 -15  64363. 2342.09  -1
   1   1  15  61359. 2110.78   1
  -1   1 -15  62974. 2173.11   1
  -1   1 -15  62261. 2212.92   1
   1  -1  16  23597. 985.729   1
   1   1  16  24611. 1082.99   1
   1   1  16  26207. 1026.29   1
  -1   1 -16  25636. 1043.93   1
   1  -1  17 3343.59 355.388   1
  -1  -1 -17 3860.30 417.198  -1
  -1  -1 -17 4126.92 448.366   1
   1   1  17 3841.53 414.945   1
   1   1  17 2707.85 273.751   1
  -1   1 -17 3901.61 369.282   1
  -1   1 -17 3667.66 391.663   1
   1  -1  18  75366. 2617.72   1
   1  -1  18  74164. 2494.55   1
  -1  -1 -18  78220. 2790.83   1
  -1  -1 -18  78971. 2846.41   1
   1   1  18  74690. 2546.37   1
   1   1  18  79497. 2818.25   1
  -1   1 -18  79572. 2751.03   1
  -1   1 -18  76155. 2705.22   1
   1  -1  19 1591.44 223.207   1
  -1  -1 -19 1244.08 354.187   1
  -1  -1 -19 1377.02 370.109   1
   1   1  19  963.20 357.454   1
   1   1  19 1827.64 255.464   1
  -1   1 -19 1440.10 353.436   1
   1  -1  20  14810. 782.200   1
   1  -1  20  14563. 653.773   1
  -1  -1 -20  15366. 900.863   1
  -1  -1 -20  16354. 894.855   1
   1   1  20  16324. 885.842   1
   1   1  20  14544. 680.059   1
  -1   1 -20  14758. 823.131   1
  -1   1 -20  16556. 837.776   1
   1  -1  21  18393. 897.108   1
  -1  -1 -21  19658. 1022.91   1
   1   1  21  18141. 944.798   1
  -1   1 -21  19703. 1014.27   1
  -1   1 -21  19632. 965.452   1
   1  -1  22  39016. 1566.65   1
   1  -1  22  39805. 1447.61   1
  -1  -1 -22  39241. 1689.82   1
  -1  -1 -22  41382. 1731.13   1
   1   1  22  39241. 1618.85   1
   1   1  22  39317. 1453.25   1
  -1   1 -22  41607. 1663.91   1
  -1   1 -22  39241. 1648.52   1
   1  -1  23 -134.40 300.863  -1
   1  -1  23  290.46 165.490   1
  -1  -1 -23 -320.84 326.398   1
  -1  -1 -23 -234.89 313.218   1
   1   1  23  185.77 158.242   1
   1   1  23 -218.81 299.324   1
  -1   1 -23  -47.80 309.913   1
  -1   1 -23 -148.07 313.969   1
   1  -1  24  44424. 1594.44   1
   1  -1  24  44724. 1764.55   1
  -1  -1 -24  47015. 1962.07   1
  -1  -1 -24  44123. 1852.80   1
   1   1  24  43222. 1570.41  -1
   1   1  24  43522. 1793.46   1
  -1   1 -24  44574. 1873.07   1
  -1   1 -24  46151. 1833.27   1
   1  -1  25 6327.44 600.075   1
   1  -1  25 7273.74 431.092   1
  -1  -1 -25 6988.35 669.921  -1
  -1  -1 -25 6184.75 651.145   1
   1   1  25 7067.21 434.096   1
   1   1  25 7277.50 640.630   1
  -1   1 -25 6199.77 592.940   1
  -1   1 -25 5208.41 618.099  -1
   1  -1  26  234.89 356.064   1
   1  -1  26  318.81 172.437   1
  -1  -1 -26  441.61 385.655   1
  -1  -1 -26  333.72 368.193   1
   1   1  26  246.86 384.528   1
   1   1  26  105.11 157.529   1
  -1   1 -26  894.48 386.406   1
  -1   1 -26  329.21 395.418   1
   1  -1  27 6331.20 402.553   1
  -1  -1 -27 5197.14 628.238   1
  -1  -1 -27 6609.08 701.839  -1
   1   1  27 6774.31 429.590   1
   1   1  27 7683.06 633.120   1
  -1   1 -27 5542.62 658.280   1
   1  -1  28  31175. 1200.15   1
   1  -1  28  32944. 1455.88   1
  -1  -1 -28  30852. 1574.91   1
  -1  -1 -28  34093. 1628.61   1
   1   1  28  30364. 1175.74  -1
   1   1  28  32231. 1473.15   1
  -1   1 -28  33034. 1520.09   1
  -1   1 -28  31908. 1568.53   1
   1  -1  29 -209.84 392.414   1
   1  -1  29   66.39 160.646   1
  -1  -1 -29   56.48 442.733   1
  -1  -1 -29  475.78 517.086   1
   1   1  29  -10.75 147.653   1
   1   1  29 -149.34 384.528   1
  -1   1 -29   81.79 431.468   1
  -1   1 -29 -145.40 432.970   1
  -1  -1 -30 4708.97 753.661   1
  -1  -1 -30 6102.13 773.187   1
   1   1  30 5452.49 640.255   1
   1   1  30 6597.82 420.202   1
  -1   1 -30 6473.90 731.881   1
  -1   1 -30 6729.25 819.376   1
   1  -1  31 2773.56 582.050   1
  -1  -1 -31 1800.22 583.927   1
  -1  -1 -31 2574.16 622.981   1
   1   1  31 3112.28 541.494   1
   1   1  31 2047.69 262.073   1
  -1   1 -31 1349.23 558.017   1
   1  -1  32 -184.75 452.121  -1
   1  -1  32  132.33 188.697   1
  -1  -1 -32  -66.05 509.951   1
  -1  -1 -32 -293.32 472.399   1
   1   1  32  119.30 171.986   1
   1   1  32 -352.65 410.439   1
  -1   1 -32 -106.05 544.874   1
  -1   1 -32  -20.10 506.571   1
   1  -1  33 1113.40 523.469   1
   1  -1  33  953.81 247.465   1
  -1  -1 -33  808.11 558.768   1
   1   1  33 1374.39 517.461   1
   1   1  33 1217.05 260.157   1
  -1   1 -33 1544.50 607.960   1
   1  -1  34  10841. 602.328   1
   1  -1  34  10567. 892.226   1
  -1  -1 -34  10203. 1002.63   1
   1   1  34 7844.53 859.181   1
  -1   1 -34 8021.02 918.888   1
  -1   1 -34 9429.21 1022.53   1
   1  -1  35  -44.42 449.117   1
   1  -1  35   18.40 236.763   1
  -1  -1 -35  -45.44 494.179   1
   1   1  35   95.57 390.161   1
   1   1  35 -183.25 184.829  -1
  -1   1 -35 -199.29 512.955   1
  -1   1 -35 -327.75 541.870   1
   1  -1  36 3007.13 429.590   1
   1  -1  36 2040.55 518.212   1
   1   1  36 1856.93 439.354   1
  -1   1 -36 1676.30 614.720  -1
  -1   1 -36 1236.95 533.233  -1
  -1  -1 -37 1743.52 506.196   1
   1   1  37 3014.27 468.644   1
   1  -2 -37  723.24 471.648   1
  -1   2  37 3233.57 487.044   1
   1  -2 -36 3474.65 703.341   1
  -1  -2  36 4746.52 602.328   1
   1  -2 -35 3025.16 667.667   1
  -1  -2  35 3216.29 615.471   1
  -1  -2  35 3995.49 435.599   1
   1   2 -35 3260.98 754.412   1
   1   2 -35 3584.30 776.192  -1
  -1   2  35 3905.37 572.662   1
  -1   2  35 5550.13 442.358   1
   1  -2 -34  392.04 544.123   1
  -1  -2  34  304.02 526.098   1
   1   2 -34   34.48 609.087   1
   1   2 -34 -326.51 581.674   1
  -1   2  34  624.86 226.812   1
  -1   2  34  -36.79 473.901   1
   1  -2 -33 5809.23 800.225   1
  -1  -2  33 7547.87 491.550   1
  -1  -2  33 6473.90 762.673   1
   1   2 -33 5700.33 875.328   1
   1   2 -33 6451.36 820.127   1
   1  -2 -32 3666.16 723.619   1
  -1  -2  32 4487.42 642.883   1
  -1  -2  32 4799.09 389.410   1
   1   2 -32 4262.11 750.656   1
   1   2 -32 3522.34 686.819   1
  -1   2  32 4273.37 411.190   1
  -1   2  32 5001.87 670.296   1
   1  -2 -31 1771.68 564.025   1
   1  -2 -31  533.23 546.376   1
  -1  -2  31  324.18 524.220   1
  -1  -2  31 1224.18 239.805   1
   1   2 -31  702.97 556.139  -1
   1   2 -31  789.33 559.894  -1
  -1   2  31 1188.51 220.240   1
  -1   2  31  909.50 454.750  -1
   1  -2 -30 7904.61 815.996   1
   1  -2 -30 6935.78 842.658   1
  -1  -2  30 7164.84 761.546   1
  -1  -2  30 8385.27 469.019   1
   1   2 -30 5659.03 718.738   1
   1   2 -30 6451.36 779.196   1
  -1   2  30 7964.69 732.256  -1
   1  -2 -29  13331. 981.974   1
  -1  -2  29  12632. 871.573   1
  -1  -2  29  12242. 595.568   1
   1   2 -29  12069. 944.423   1
   1   2 -29  11322. 857.303   1
  -1   2  29  12816. 945.549   1
  -1   2  29  12328. 608.711   1
   1  -2 -28 -109.16 460.383   1
   1  -2 -28 -252.83 437.101   1
  -1  -2  28 -201.84 387.908   1
   1   2 -28 -190.57 425.835   1
  -1   2  28 -376.64 365.227   1
  -1   2  28 -154.19 154.863   1
   1  -2 -27  18393. 1147.95   1
  -1  -2  27  16718. 924.520   1
  -1  -2  27  16842. 742.020   1
   1   2 -27  17920. 1074.73   1
   1   2 -27  16909. 963.950   1
  -1   2  27  17713. 1012.39   1
   1  -2 -26  13417. 912.879  -1
   1  -2 -26  11720. 897.483   1
  -1  -2  26  13237. 793.090   1
  -1  -2  26  13128. 609.462   1
   1   2 -26  13703. 891.850   1
   1   2 -26  12189. 814.870   1
  -1   2  26  12614. 848.666   1
  -1   2  26  13515. 652.647   1
   1  -2 -25  755.54 417.949   1
   1  -2 -25  285.24 366.203   1
  -1  -2  25  469.77 187.570   1
  -1  -2  25  -67.48 316.860   1
   1   2 -25   18.54 346.827   1
   1   2 -25  224.93 363.950   1
  -1   2  25  576.04 201.239   1
  -1   2  25 -279.46 350.544   1
   1  -2 -24 3270.74 488.922   1
   1  -2 -24 3103.26 526.849  -1
  -1  -2  24 1993.61 408.561   1
  -1  -2  24 2903.11 272.512   1
   1   2 -24 3078.86 457.003   1
   1   2 -24 2367.63 440.105   1
  -1   2  24 3078.10 295.343   1
  -1   2  24 2999.25 469.771   1
   1  -2 -23  27244. 1430.34   1
   1  -2 -23  25392. 1256.85   1
  -1  -2  23  23376. 1078.48   1
  -1  -2  23  23928. 935.035   1
   1   2 -23  24157. 1139.32   1
  -1   2  23  24968. 1010.51   1
  -1   2  23  25422. 1262.11   1
   1  -2 -22  129.03 369.545   1
   1  -2 -22 -173.19 331.355   1
  -1  -2  22  138.38 292.039   1
  -1  -2  22  140.48 149.380   1
   1   2 -22  246.00 292.752  -1
   1   2 -22  107.55 294.930   1
  -1   2  22   33.10 153.060   1
  -1   2  22  -16.04 369.470   1
   1  -2 -21  29707. 1412.32   1
   1  -2 -21  32152. 1452.50   1
  -1  -2  21  30927. 1267.74   1
  -1  -2  21  31123. 1147.58   1
   1   2 -21  31573. 1288.40   1
   1   2 -21  30875. 1309.42   1
   1  -2 -20  34089. 1531.35   1
  -1  -2  20  33346. 1318.81   1
  -1  -2  20  35145. 1267.37   1
   1   2 -20  32899. 1338.71   1
   1   2 -20  32294. 1280.51  -1
  -1   2  20  33819. 1464.14   1
   1  -2 -19 1842.28 389.410   1
   1  -2 -19 2221.93 428.088   1
  -1  -2  19 1894.10 321.104   1
   1   2 -19 1644.38 290.574   1
  -1   2  19 1181.00 350.769   1
  -1   2  19 1492.30 229.590   1
   1  -2 -18  38303. 1605.71   1
   1  -2 -18  36808. 1565.15   1
  -1  -2  18  38040. 1424.71   1
  -1  -2  18  38979. 1369.13   1
   1   2 -18  37702. 1417.57   1
   1   2 -18  38077. 1464.14   1
  -1   2  18  39805. 1470.52   1
  -1   2  18  37371. 1539.99   1
   1  -2 -17  14683. 831.392   1
   1  -2 -17  15287. 862.185   1
  -1  -2  17  13218. 641.381   1
  -1  -2  17  13132. 559.894   1
   1   2 -17  15573. 710.852   1
   1   2 -17  13552. 677.055   1
  -1   2  17  13872. 649.643   1
  -1   2  17  13928. 792.339   1
   1  -2 -16  341.49 284.341   1
   1  -2 -16  657.90 279.271   1
  -1  -2  16  616.60 148.216   1
  -1  -2  16  526.85 214.833   1
   1   2 -16  479.16 222.381   1
   1   2 -16  287.34 201.952   1
  -1   2  16  544.50 280.285   1
  -1   2  16  854.30 201.577   1
   1  -2 -15  66279. 2432.22   1
   1  -2 -15  64626. 2349.98   1
  -1  -2  15  61472. 2034.92   1
  -1  -2  15  61660. 2101.39  -1
   1   2 -15  62861. 2151.33   1
   1   2 -15  66279. 2245.96   1
  -1   2  15  62936. 2295.53   1
  -1   2  15  60007. 2075.10   1
   1  -2 -14  86970. 3031.17   1
  -1  -2  14  90687. 2977.84   1
  -1  -2  14  91025. 2936.16   1
   1   2 -14  86782. 2870.82   1
   1   2 -14  86632. 2849.42   1
  -1   2  14  87946. 2938.04   1
   1  -2 -13  25926. 1136.31   1
   1  -2 -13  25329. 1097.26   1
  -1  -2  13  23331. 839.278   1
  -1  -2  13  23492. 892.226   1
   1   2 -13  23740. 906.120   1
  -1   2  13  25212. 1092.00   1
  -1   2  13  22910. 921.516   1
   1  -2 -12  69170. 2440.85   1
   1  -2 -12  67292. 2398.42   1
  -1  -2  12  69546. 2253.47   1
   1   2 -12  66203. 2194.89   1
  -1   2  12  66316. 2250.84   1
  -1   2  12  66992. 2370.63  -1
   1  -2 -11  50845. 1855.05   1
   1   2 -11  52009. 1722.87   1
   1   2 -11  49568. 1658.65   1
  -1   2  11  50432. 1841.91   1
   1  -2 -10  22358. 949.680   1
   1  -2 -10  22629. 965.076   1
  -1  -2  10  22895. 812.241   1
  -1  -2  10  24018. 825.760   1
   1   2 -10  22602. 799.474   1
   1   2 -10  22846. 814.870   1
  -1   2  10  22249. 878.707  -1
  -1   2  10  23248. 971.460   1
   1  -2  -9  75066. 2568.15   1
  -1  -2   9  74577. 2385.65   1
  -1  -2   9  77769. 2468.27   1
   1   2  -9  77131. 2461.88   1
  -1   2   9  75742. 2521.59   1
  -1   2   9  75028. 2562.15  -1
   1  -2  -8 188697. 6049.56   1
   1  -2  -8 184942. 5873.07   1
  -1  -2   8 194217. 6060.83   1
  -1   2   8 189974. 6034.54   1
  -1   2   8 190499. 6132.18   1
   1  -2  -7 2139.31 205.557   1
  -1  -2   7 2157.34 120.653  -1
  -1  -2   7 2127.67 105.520   1
   1   2  -7 2414.57 126.699   1
  -1   2   7 2162.60 200.939   1
   1  -2  -6  57792. 1971.46   1
   1  -2  -6  61923. 2084.11   1
  -1   2   6  61585. 2051.44   1
  -1   2   6  60308. 2079.98   1
   1  -2  -5 149455. 4776.56   1
  -1   2   5 148216. 4750.28   1
  -1   2   5 141044. 4487.42  -1
   1  -2  -4 149080. 4746.52   1
  -1   2   4 153473. 4859.18   1
   1  -2  -3 2520.09 204.957   1
  -1  -2   3 2425.46 103.530   1
   1   2  -3 2657.53 116.748   1
  -1   2   3 2595.94 186.143   1
   1  -2  -2 315321. 9831.01   1
   1  -2  -2 300525. 9387.90   1
  -1  -2   2 307810. 9556.88   1
  -1  -2   2 300263. 9309.04   1
   1   2  -2 317311. 9846.03   1
   1   2  -2 296770. 9211.41   1
  -1   2   2 304619. 9496.80   1
  -1   2   2 297859. 9312.80   1
   1  -2  -1 125497. 3969.20   1
   1  -2  -1 119452. 3773.94   1
  -1  -2   1 131468. 4115.66   1
   1   2  -1 126023. 3961.69   1
  -1   2   1 129628. 4104.39   1
  -1   2   1 118288. 3733.00   1
   1  -2   0  93278. 2957.19   1
   1  -2   0  96808. 3060.46   1
  -1  -2   0  96019. 3043.93   1
  -1  -2   0 100037. 3181.37   1
   1   2   0  94855. 3011.64   1
   1   2   0 102103. 3241.83   1
  -1   2   0  96883. 3076.23  -1
  -1   2   0  99211. 3130.30   1
   1  -2   1 176380. 5501.31   1
  -1  -2  -1 180248. 5674.05   1
  -1  -2  -1 179872. 5647.76   1
   1   2   1 174315. 5478.78   1
   1   2   1 177319. 5580.17  -1
  -1   2  -1 178032. 5561.39   1
   1  -2   2 164776. 5133.30   1
  -1  -2  -2 153511. 4851.67   1
  -1  -2  -2 168269. 5328.57   1
   1   2   2 163838. 5189.63   1
   1   2   2 157642. 4986.85   1
  -1   2  -2 159895. 4994.36   1
   1   2   3 1921.14 197.747   1
  -1   2  -3 1463.39  98.610   1
  -1   2  -3 1751.41 111.416   1
   1  -2   4  77469. 2426.96   1
   1  -2   4  81036. 2550.88   1
  -1  -2  -4  78558. 2593.69   1
  -1  -2  -4  76868. 2535.86   1
   1   2   4  73864. 2443.48  -1
   1   2   4  75291. 2476.53   1
  -1   2  -4  69621. 2191.51   1
   1  -2   5  76793. 2413.07   1
  -1  -2  -5  73488. 2454.75   1
   1   2   5  75291. 2494.93   1
   1   2   5  75253. 2507.32   1
  -1   2  -5  69884. 2199.02  -1
   1  -2   6  11637. 416.447   1
  -1  -2  -6  10725. 529.853   1
  -1  -2  -6  10826. 527.224   1
   1   2   6  10225. 505.069   1
   1   2   6  11506. 574.539   1
  -1   2  -6  10308. 375.892   1
   1  -2   7 151370. 4746.52   1
   1  -2   7 140818. 4408.56   1
  -1  -2  -7 149268. 4814.11   1
  -1  -2  -7 145813. 4723.99   1
   1   2   7 154825. 4994.36   1
  -1   2  -7 147653. 4648.89   1
  -1   2  -7 148254. 4637.62   1
   1  -2   8  23958. 840.029   1
   1  -2   8  24397. 836.274   1
  -1  -2  -8  24465. 982.350   1
  -1  -2  -8  24799. 1004.13   1
   1   2   8  26346. 1065.71  -1
   1  -2   9  155.05 128.877   1
   1  -2   9  473.15 148.141   1
  -1  -2  -9  205.71 180.886   1
  -1  -2  -9  599.70 223.657   1
   1   2   9  387.53 145.024   1
   1   2   9  245.55 182.463  -1
  -1   2  -9  356.63 134.134   1
  -1   2  -9  297.15 112.129   1
   1  -2  10  22249. 836.274   1
  -1  -2 -10  21337. 921.892  -1
   1   2  10  22099. 950.806   1
  -1   2 -10  22475. 806.608   1
  -1   2 -10  23271. 871.197   1
  -1  -2 -11  74878. 2611.34   1
  -1  -2 -11  73451. 2555.39   1
   1   2  11  73564. 2557.64   1
   1   2  11  75554. 2538.11   1
  -1   2 -11  76943. 2539.24   1
   1  -2  12  14041. 634.997   1
   1  -2  12  16282. 659.031   1
  -1  -2 -12  14394. 733.758   1
  -1  -2 -12  15321. 776.943   1
   1   2  12  16125. 784.453   1
   1   2  12  17649. 752.909   1
  -1   2 -12  16083. 683.064   1
   1  -2  13 243147. 7724.36   1
   1  -2  13 235786. 7438.97   1
  -1  -2 -13 234848. 7577.91   1
  -1  -2 -13 233421. 7544.12   1
   1   2  13 236500. 7630.48   1
   1   2  13 231055. 7360.11   1
  -1   2 -13 242358. 7686.81   1
  -1   2 -13 237026. 7465.26   1
   1  -2  14  37386. 1342.47   1
  -1  -2 -14  37052. 1496.43   1
  -1  -2 -14  35021. 1430.34   1
   1   2  14  38753. 1412.32   1
   1   2  14  38228. 1514.46   1
  -1   2 -14  35959. 1338.71   1
  -1   2 -14  35727. 1274.13   1
   1  -2  15  556.14 151.896   1
   1  -2  15  308.86 217.612   1
  -1  -2 -15  219.34 248.967   1
  -1  -2 -15  231.51 293.203   1
   1   2  15  379.65 175.817   1
   1   2  15  341.76 247.165   1
  -1   2 -15  147.05 203.905   1
  -1   2 -15  344.54 180.773   1
   1  -2  16  18258. 786.706   1
   1  -2  16  19129. 754.787   1
  -1  -2 -16  17262. 904.242   1
   1   2  16  18479. 791.212   1
   1   2  16  18596. 929.402   1
  -1   2 -16  17338. 740.893   1
  -1   2 -16  17390. 813.368   1
   1  -2  17  60120. 2025.16   1
   1  -2  17  59820. 2071.72   1
  -1  -2 -17  59444. 2263.61   1
  -1  -2 -17  57116. 2154.71   1
   1   2  17  59857. 2091.62   1
   1   2  17  59181. 2216.30   1
  -1   2 -17  59332. 2139.69   1
  -1   2 -17  58130. 2012.39   1
   1  -2  18 3628.24 365.640   1
  -1  -2 -18 3613.97 444.235   1
  -1  -2 -18 3574.16 473.901   1
   1   2  18 3477.65 312.317   1
   1   2  18 3954.18 460.007   1
  -1   2 -18 3405.18 329.177   1
   1  -2  19  36804. 1327.45   1
   1  -2  19  37428. 1426.21   1
  -1  -2 -19  41006. 1693.20   1
   1   2  19  38603. 1598.57   1
  -1   2 -19  41194. 1528.73   1
  -1   2 -19  38340. 1528.73   1
   1  -2  20  50432. 1845.66   1
   1  -2  20  49305. 1714.61   1
  -1  -2 -20  50019. 2003.75   1
  -1  -2 -20  48742. 1984.23   1
   1   2  20  48704. 1921.52   1
   1   2  20  49117. 1766.43   1
  -1   2 -20  49643. 1901.99   1
  -1   2 -20  49455. 1803.98   1
   1  -2  21  723.24 172.625   1
  -1  -2 -21  261.58 358.392   1
  -1  -2 -21  344.24 339.729   1
  -1   2 -21   66.05 303.041   1
   1  -2  22  19035. 909.124   1
   1  -2  22  21645. 864.438   1
  -1  -2 -22  19332. 1066.84   1
   1   2  22  20101. 861.434   1
  -1   2 -22  20815. 967.705   1
  -1   2 -22  19786. 1002.63   1
   1  -2  23  46977. 1657.90   1
   1  -2  23  48742. 1846.04   1
  -1  -2 -23  49268. 2027.79   1
  -1  -2 -23  46076. 1921.89   1
   1   2  23  46602. 1677.81   1
   1   2  23  47353. 1903.87   1
  -1   2 -23  47353. 1898.23   1
  -1   2 -23  47728. 1826.13   1
   1  -2  24 3890.35 307.735   1
   1  -2  24 2983.85 439.354   1
  -1  -2 -24 3571.91 552.760   1
  -1  -2 -24 3777.69 541.119   1
   1   2  24 3565.15 484.791   1
   1   2  24 3811.49 321.329   1
  -1   2 -24 3634.99 462.636   1
  -1   2 -24 3668.42 504.693   1
   1  -2  25  13327. 775.065   1
   1  -2  25  12764. 601.952   1
  -1  -2 -25  15546. 984.978   1
  -1  -2 -25  14840. 960.570   1
   1   2  25  13286. 838.903   1
   1   2  25  13902. 664.288   1
  -1   2 -25  14810. 832.894   1
  -1   2 -25  14994. 932.782   1
   1  -2  26  16331. 882.838   1
   1  -2  26  15268. 690.949   1
  -1  -2 -26  15355. 997.370   1
   1   2  26  16707. 954.937   1
  -1   2 -26  15554. 993.240  -1
  -1   2 -26  15599. 883.214   1
   1  -2  27 1861.81 432.594   1
   1  -2  27 2289.52 274.690   1
  -1  -2 -27 1403.68 477.281   1
  -1  -2 -27 2165.23 506.947   1
   1   2  27 2337.21 458.129   1
  -1   2 -27 1070.60 492.677   1
  -1   2 -27 1299.66 446.488   1
   1  -2  28  751.03 214.044   1
   1  -2  28  523.47 424.333   1
  -1  -2 -28 1275.63 478.032   1
   1   2  28  971.46 200.225   1
  -1   2 -28 1022.15 435.974   1
  -1   2 -28 1071.35 486.669   1
   1  -2  29  24686. 986.480  -1
  -1  -2 -29  24600. 1370.26   1
  -1  -2 -29  25896. 1423.21   1
   1   2  29  23669. 960.945   1
   1   2  29  25828. 1286.89   1
  -1   2 -29  25096. 1381.15   1
   1  -2  30 6804.35 436.725   1
   1  -2  30 6334.95 697.709   1
  -1  -2 -30 4862.93 748.779   1
  -1  -2 -30 5651.52 774.689   1
   1   2  30 6789.33 426.586   1
   1   2  30 7296.28 689.447   1
  -1   2 -30 5542.62 677.806  -1
  -1   2 -30 5144.57 757.416   1
   1  -2  31 1043.93 239.279   1
   1  -2  31  461.88 504.693   1
  -1  -2 -31  885.47 529.853   1
   1   2  31 1535.11 469.019   1
  -1   2 -31  783.70 514.457   1
  -1   2 -31 1031.54 583.176  -1
   1  -2  32 2918.89 615.846   1
   1  -2  32 2795.34 328.652   1
  -1  -2 -32 3316.56 627.487   1
   1   2  32 2644.76 571.911   1
   1   2  32 2941.04 292.264   1
  -1   2 -32 2221.93 568.531   1
  -1   2 -32 2292.90 663.161   1
   1  -2  33 1922.27 575.290   1
   1   2  33 1710.10 529.102   1
   1   2  33 1874.58 275.854   1
  -1   2 -33 1939.92 580.548   1
   1  -2  34  463.39 526.473   1
   1  -2  34  461.51 257.228   1
  -1  -2 -34  323.28 498.310   1
  -1   2 -34  860.31 616.222   1
  -1   2 -34  613.22 573.413  -1
   1  -2  35 7401.42 779.947   1
  -1  -2 -35 8708.21 915.132   1
   1   2  35 7495.30 656.026  -1
  -1   2 -35 5918.13 937.288   1
  -1  -2 -36  555.01 496.808   1
   1   2  36 2059.33 355.088   1
   1  -3 -36   16.82 457.003   1
  -1   3  36   63.91 274.127   1
   1  -3 -35 6838.15 784.828   1
  -1   3  35  12347. 674.051   1
  -1  -3  34 1743.90 574.539   1
  -1  -3  34 1829.89 336.838   1
   1   3 -34  112.28 606.083   1
   1   3 -34 1915.88 693.202   1
  -1   3  34 1895.98 497.559   1
   1  -3 -33 2660.53 633.495   1
  -1  -3  33 3100.26 349.756   1
   1   3 -33 3176.49 796.845   1
   1   3 -33 1293.28 588.058   1
  -1   3  33 2855.42 562.523   1
  -1   3  33 3360.87 330.529  -1
   1  -3 -32  208.90 444.235   1
  -1  -3  32   89.86 218.888   1
  -1  -3  32   82.73 505.820   1
   1   3 -32 -193.54 474.277   1
   1   3 -32  367.44 612.091   1
  -1   3  32  354.45 405.933   1
  -1   3  32   42.21 154.713   1
   1  -3 -31  11930. 977.093   1
  -1  -3  31  10597. 825.384   1
   1   3 -31 9849.78 868.193   1
  -1   3  31  11956. 870.070   1
  -1   3  31  12234. 599.699   1
   1  -3 -30  670.67 563.274   1
   1  -3 -30  550.13 529.853   1
  -1  -3  30  153.36 463.387   1
  -1  -3  30  814.49 210.289   1
   1   3 -30  823.51 562.898   1
   1   3 -30  501.69 486.293   1
  -1   3  30  538.87 210.176   1
  -1   3  30 1232.44 431.843   1
   1  -3 -29  12595. 967.705  -1
   1  -3 -29  11446. 1004.51   1
  -1  -3  29  11438. 557.266   1
  -1  -3  29  12606. 826.886   1
   1   3 -29 9677.05 795.718   1
   1   3 -29  10646. 926.773   1
  -1   3  29  12745. 870.070   1
  -1   3  29  11885. 591.438   1
   1  -3 -28  203.42 411.190   1
   1  -3 -28  241.27 502.065   1
  -1  -3  28  512.20 408.937   1
  -1  -3  28 1052.20 216.898   1
   1   3 -28  569.28 446.488   1
   1   3 -28  337.06 417.198   1
  -1   3  28  952.31 399.549   1
  -1   3  28  920.01 203.342   1
   1  -3 -27 5831.76 654.149   1
   1   3 -27 4585.05 615.471   1
   1   3 -27 5088.24 564.776   1
  -1   3  27 5523.84 381.900   1
   1  -3 -26  811.49 399.173   1
   1  -3 -26   64.33 412.692   1
  -1  -3  26   66.58 161.660   1
  -1  -3  26  314.08 350.431   1
   1   3 -26  175.74 398.422   1
   1   3 -26   40.52 338.678   1
  -1   3  26  175.29 367.217   1
  -1   3  26  292.49 164.476   1
   1  -3 -25  28216. 1453.62   1
  -1  -3  25  25347. 964.325   1
   1   3 -25  27247. 1268.87   1
  -1   3  25  24228. 1230.94   1
   1  -3 -24 4059.33 618.850   1
   1  -3 -24 5550.13 615.471   1
  -1  -3  24 5242.20 493.803   1
  -1  -3  24 5839.27 354.788   1
   1   3 -24 5185.88 485.918   1
   1   3 -24 5118.28 535.486   1
  -1   3  24 5572.66 393.541   1
  -1   3  24 4352.23 550.882   1
   1  -3 -23 9951.17 817.123   1
   1  -3 -23  10218. 767.930   1
  -1  -3  23  10533. 495.681   1
  -1  -3  23  10105. 609.462   1
   1   3 -23  10785. 695.456   1
   1   3 -23 9782.19 604.581   1
   1  -3 -22  140.82 384.528   1
   1  -3 -22  727.75 365.753   1
  -1  -3  22  744.27 289.898   1
   1   3 -22  561.40 275.779   1
  -1   3  22  836.65 200.901   1
  -1   3  22  765.30 379.647   1
   1  -3 -21  15103. 920.390   1
  -1  -3  21  15392. 631.242   1
  -1  -3  21  15757. 743.522   1
   1   3 -21  15723. 798.722   1
   1   3 -21  15310. 724.370   1
  -1   3  21  15775. 727.750   1
   1  -3 -20 1565.53 424.333   1
   1  -3 -20 1492.68 398.422   1
  -1  -3  20 1025.91 281.937   1
  -1  -3  20 1787.46 196.432   1
   1   3 -20 1497.93 300.563  -1
   1   3 -20 1353.36 270.447   1
  -1   3  20 1669.92 246.939  -1
  -1   3  20 1226.44 383.402   1
   1  -3 -19  46639. 1930.15   1
   1  -3 -19  46113. 1882.09   1
  -1  -3  19  44311. 1582.80   1
  -1  -3  19  44424. 1514.08   1
   1   3 -19  44574. 1636.87   1
   1   3 -19  44724. 1590.31   1
  -1   3  19  42471. 1560.64   1
  -1   3  19  46376. 1869.69   1
   1  -3 -18 4806.60 532.106   1
  -1  -3  18 3785.20 329.928   1
  -1  -3  18 3792.71 249.268   1
   1   3 -18 4070.59 355.201   1
   1   3 -18 4742.77 332.857   1
  -1   3  18 4491.17 498.310   1
   1  -3 -17  11983. 763.799   1
   1  -3 -17  11769. 759.669   1
  -1  -3  17  12531. 511.828   1
  -1  -3  17  11359. 534.359   1
   1   3 -17  11986. 539.241   1
   1   3 -17  11776. 573.413   1
  -1   3  17  11596. 731.881   1
  -1   3  17  12043. 603.079   1
   1  -3 -16  550.13 322.606   1
   1  -3 -16  999.25 312.917   1
  -1  -3  16  746.90 210.852   1
  -1  -3  16  559.89 127.000   1
   1   3 -16  445.36 175.253   1
   1   3 -16  388.66 181.149   1
  -1   3  16  809.61 298.760   1
  -1   3  16 1047.69 213.931   1
   1  -3 -15  35043. 1466.77   1
   1  -3 -15  32384. 1410.06   1
  -1  -3  15  34341. 1164.85   1
   1   3 -15  32501. 1167.85   1
  -1   3  15  34461. 1302.66   1
  -1   3  15  34288. 1429.21   1
   1  -3 -14  18757. 926.773   1
   1  -3 -14  19617. 1000.00   1
  -1  -3  14  19196. 717.987   1
  -1  -3  14  18179. 654.900   1
   1   3 -14  18791. 696.582   1
   1   3 -14  18167. 704.468   1
  -1   3  14  19564. 946.676   1
  -1   3  14  17176. 752.159   1
   1  -3 -13 150657. 5009.38   1
   1  -3 -13 147803. 4960.57   1
  -1  -3  13 146864. 4615.09   1
  -1  -3  13 143560. 4532.48   1
   1   3 -13 146864. 4626.36   1
   1   3 -13 141119. 4476.15   1
  -1   3  13 141044. 4577.54   1
  -1   3  13 147540. 4904.24   1
   1  -3 -12  13331. 720.240   1
  -1  -3  12  14638. 518.963   1
  -1  -3  12  14292. 528.727   1
   1   3 -12  12152. 473.526   1
   1   3 -12  11968. 447.240   1
  -1   3  12  13402. 625.610  -1
   1  -3 -11  21968. 979.346   1
   1  -3 -11  20661. 965.452   1
  -1  -3  11  22065. 745.775   1
   1   3 -11  21915. 732.632   1
  -1   3  11  20612. 958.692   1
  -1   3  11  22707. 910.626   1
   1  -3 -10  14097. 744.648   1
   1  -3 -10  14360. 725.497   1
  -1  -3  10  14108. 471.648  -1
  -1  -3  10  14187. 481.411   1
   1   3 -10  14420. 493.428   1
   1   3 -10  13800. 461.885   1
  -1   3  10  14243. 636.500   1
  -1   3   9  60083. 2185.50   1
  -1   3   8  21769. 862.185   1
  -1   3   8  22197. 954.562   1
   1  -3  -7 230905. 7322.56   1
   1  -3  -7 234435. 7480.28   1
  -1   3   7 231093. 7315.05   1
  -1   3   7 237964. 7592.93   1
  -1   3   6  28427. 1048.82   1
  -1   3   6  27582. 1084.11   1
   1  -3  -5 7457.75 425.460   1
   1  -3  -5 7675.55 393.541   1
  -1   3   5 7818.24 399.549   1
  -1   3   5 8366.50 468.268   1
   1  -3  -4  18520. 757.040   1
   1  -3  -4  17424. 688.321   1
  -1  -3   4  17101. 570.409   1
  -1  -3   4  17664. 594.442   1
   1   3  -4  17882. 592.189   1
   1   3  -4  17814. 597.446   1
  -1   3   4  18596. 773.563   1
  -1   3   4  18089. 707.848   1
   1  -3  -3 207135. 6530.22   1
   1  -3  -3 204506. 6477.65   1
  -1  -3   3 208336. 6496.43   1
   1   3  -3 217574. 6789.33   1
  -1   3   3 210214. 6669.16   1
  -1   3   3 208299. 6567.77   1
   1  -3  -2 7390.15 377.769   1
   1  -3  -2 7472.77 357.979   1
  -1  -3   2 6830.64 305.445   1
  -1  -3   2 7176.11 309.237   1
   1   3  -2 7551.63 311.077   1
   1   3  -2 7157.33 317.086   1
  -1   3   2 7326.32 387.157   1
  -1   3   2 7536.61 358.881   1
   1  -3  -1  75366. 2466.39   1
  -1  -3   1  79384. 2562.15   1
  -1  -3   1  77694. 2495.68   1
   1   3  -1  84303. 2692.07   1
   1   3  -1  83665. 2696.96   1
  -1   3   1  80886. 2614.34   1
   1  -3   0 1205.41 148.855   1
   1  -3   0 1543.75 143.823   1
  -1  -3   0 1318.44 158.205   1
   1   3   0 1991.74 182.463   1
   1   3   0 1796.84 154.600   1
  -1   3   0 1340.97 159.970   1
  -1   3   0 1621.10 146.414   1
   1  -3   1  34825. 1167.48   1
   1  -3   1  33440. 1133.68   1
  -1  -3  -1  33766. 1200.52   1
   1   3   1  36091. 1240.33   1
  -1   3  -1  33233. 1141.19   1
  -1   3  -1  34277. 1143.45   1
   1  -3   2 6601.57 285.918   1
   1  -3   2 5918.13 269.620   1
  -1  -3  -2 5786.70 338.415   1
   1   3   2 7157.33 353.924   1
  -1   3  -2 7048.43 289.635   1
   1  -3   3 232031. 7224.93   1
   1  -3   3 246113. 7664.28   1
  -1  -3  -3 250056. 7885.84  -1
  -1  -3  -3 242471. 7664.28   1
   1   3   3 250094. 7900.86   1
   1   3   3 255201. 8017.27   1
  -1   3  -3 254412. 7904.61   1
  -1   3  -3 253811. 7915.88   1
   1  -3   4  353.81  70.935   1
  -1  -3  -4  236.61 148.291   1
  -1  -3  -4  186.41 165.377   1
   1   3   4  230.49 161.134   1
   1   3   4  458.13 136.763   1
  -1   3  -4  288.81  87.796   1
   1  -3   5 140330. 4382.27   1
  -1  -3  -5 144949. 4682.68   1
  -1  -3  -5 136951. 4449.86  -1
   1   3   5 141645. 4543.74   1
   1   3   5 143410. 4656.40   1
   1  -3   6  12201. 422.455   1
  -1  -3  -6  10421. 538.865   1
  -1  -3  -6  11618. 586.556   1
   1   3   6  13455. 591.062   1
   1   3   6  13094. 630.867   1
   1  -3   7  68644. 2162.60   1
  -1  -3  -7  63988. 2236.20   1
  -1  -3  -7  64101. 2248.97   1
   1   3   7  64889. 2258.73  -1
   1   3   7  70559. 2370.26   1
  -1   3  -7  63012. 2006.01   1
   1   3   8 9049.93 539.241   1
  -1   3  -8 8580.54 335.711   1
   1  -3   9 181825. 5707.84   1
  -1  -3  -9 181374. 5925.64   1
  -1  -3  -9 174915. 5696.58   1
   1   3   9 175028. 5613.96   1
   1   3   9 183177. 5989.48   1
  -1   3  -9 172212. 5381.14   1
  -1   3  -9 177995. 5591.43   1
   1  -3  10  859.18 162.861   1
   1  -3  10  651.14 119.977   1
  -1  -3 -10  870.82 285.355   1
  -1  -3 -10 1144.95 262.636   1
   1   3  10  -13.46  27792.   1
   1   3  10  872.70 178.821   1
  -1   3 -10  603.45 136.463   1
  -1   3 -10  695.08 128.577   1
   1  -3  11  68569. 2200.15   1
   1  -3  11  75554. 2466.39   1
  -1  -3 -11  71386. 2530.23   1
  -1  -3 -11  75591. 2663.53   1
   1   3  11  68532. 2341.72   1
   1   3  11  74653. 2644.01   1
  -1   3 -11  75253. 2409.69   1
  -1   3 -11  73564. 2402.18   1
   1  -3  12  11198. 474.652   1
  -1  -3 -12  10653. 644.010   1
  -1  -3 -12 9876.07 663.912   1
   1   3  12  10635. 641.757   1
   1   3  12  11213. 555.764  -1
  -1   3 -12 9898.60 459.256   1
  -1   3 -12 9267.73 396.169   1
   1  -3  13  17127. 721.366   1
  -1  -3 -13  15674. 837.025  -1
  -1  -3 -13  16204. 864.438   1
   1   3  13  15253. 800.225   1
   1   3  13  17026. 746.526   1
  -1   3 -13  16647. 689.072   1
  -1  -3 -14 3980.47 450.619   1
  -1  -3 -14 4799.09 473.526   1
   1   3  14 3796.47 418.325   1
  -1   3 -14 4427.33 282.764   1
  -1   3 -14 4799.09 334.848   1
   1  -3  15 253961. 7979.71   1
   1  -3  15 251258. 7878.33   1
  -1  -3 -15 246038. 8009.76   1
  -1  -3 -15 251220. 8171.23   1
   1   3  15 241006. 7675.55   1
   1   3  15 249380. 8077.35  -1
  -1   3 -15 252459. 7927.14   1
  -1   3 -15 247052. 7833.26   1
   1  -3  16  534.36 205.708   1
   1  -3  16  963.95 154.975   1
  -1  -3 -16  471.27 300.225   1
  -1  -3 -16  464.89 294.292   1
   1   3  16  307.59 289.823   1
   1   3  16  856.93 203.079   1
  -1   3 -16  799.10 228.539   1
  -1   3 -16  819.38 191.738   1
   1  -3  17  18190. 710.101   1
   1  -3  17  20627. 829.515   1
   1   3  17  22242. 1072.10   1
  -1   3 -17  21968. 937.288   1
  -1   3 -17  22264. 862.560   1
   1  -3  18 5820.50 393.541   1
   1  -3  18 5433.72 320.691   1
  -1  -3 -18 4322.19 501.689   1
  -1  -3 -18 5557.64 553.511   1
   1   3  18 5501.31 394.292   1
   1   3  18 5384.90 516.334   1
  -1   3 -18 4671.42 413.443   1
  -1   3 -18 4386.03 337.664   1
   1  -3  19  49117. 1728.12   1
   1  -3  19  49793. 1700.71   1
  -1  -3 -19  48517. 1964.32   1
  -1  -3 -19  47878. 1951.93   1
   1   3  19  46602. 1871.20   1
   1   3  19  47615. 1727.75   1
  -1   3 -19  49343. 1732.63   1
  -1   3 -19  47841. 1787.08   1
   1  -3  20 1898.61 315.433   1
  -1  -3 -20 1390.91 404.431   1
   1   3  20 1703.34 245.212   1
  -1   3 -20  832.14 252.422   1
   1  -3  21 100488. 3342.09   1
   1  -3  21  94517. 3082.99   1
  -1  -3 -21 103793. 3736.01   1
  -1  -3 -21 101877. 3666.54   1
   1   3  21 104093. 3662.03   1
   1   3  21  95381. 3196.02   1
  -1   3 -21 101089. 3481.78   1
  -1   3 -21 107398. 3559.52   1
   1  -3  22  693.58 160.984   1
   1  -3  22  552.38 286.706   1
  -1  -3 -22  717.61 387.908   1
  -1  -3 -22  722.49 360.383   1
   1   3  22  527.22 199.399  -1
   1   3  22  657.53 352.159   1
  -1   3 -22  304.02 317.123  -1
  -1   3 -22  487.42 266.429   1
   1  -3  23  189.90 138.640   1
  -1  -3 -23  151.60 364.476   1
  -1  -3 -23  241.01 341.644   1
  -1   3 -23   97.71 309.350   1
  -1   3 -23  231.99 281.712   1
   1  -3  24 3443.11 444.611   1
   1  -3  24 3423.58 271.761  -1
  -1  -3 -24 2993.24 526.098   1
  -1  -3 -24 4765.30 648.516   1
   1   3  24 3286.52 344.160   1
   1   3  24 4633.87 556.139   1
  -1   3 -24 2786.70 457.003   1
   1  -3  25  26395. 1007.88   1
   1  -3  25  26312. 1141.19   1
  -1  -3 -25  24964. 1307.55   1
  -1  -3 -25  24623. 1297.78   1
   1   3  25  25133. 1237.70   1
   1   3  25  24743. 1001.50   1
  -1   3 -25  25400. 1129.18   1
  -1   3 -25  25028. 1235.07   1
   1  -3  26  947.80 382.651   1
   1  -3  26  583.18 181.562   1
  -1  -3 -26  433.35 392.414   1
  -1  -3 -26   67.07 413.068   1
   1   3  26  763.42 188.209   1
   1   3  26   45.51 377.769   1
  -1   3 -26  416.07 430.341   1
  -1   3 -26  685.69 348.704   1
   1  -3  27  39730. 1601.20   1
   1  -3  27  35190. 1299.29   1
  -1  -3 -27  37443. 1730.75   1
  -1  -3 -27  37277. 1774.31   1
   1   3  27  37890. 1651.14   1
   1   3  27  34394. 1295.15   1
  -1   3 -27  37927. 1718.36   1
  -1   3 -27  37589. 1562.52   1
   1  -3  28 1921.89 251.783   1
   1  -3  28 1855.05 462.260   1
  -1  -3 -28 2472.40 564.776   1
  -1  -3 -28 1950.43 521.967   1
   1   3  28 2105.14 251.258   1
   1   3  28 2220.05 498.310   1
  -1   3 -28 1831.77 546.000   1
  -1   3 -28 1486.29 446.113   1
   1  -3  29 1297.41 470.146   1
  -1  -3 -29  609.09 477.656   1
  -1  -3 -29 1202.40 511.453   1
   1   3  29  782.58 442.733   1
   1   3  29 1212.17 212.692   1
  -1   3 -29 1455.88 490.799   1
   1  -3  30  322.57 429.966   1
   1  -3  30 -194.52 182.989   1
  -1  -3 -30 -477.66 458.505   1
   1   3  30  263.01 157.754   1
   1   3  30  -64.89 373.638   1
  -1   3 -30  171.69 543.372   1
  -1   3 -30  405.18 443.484   1
   1  -3  31  11802. 600.826   1
   1  -3  31 9876.07 797.220   1
  -1  -3 -31  10372. 918.512   1
   1   3  31  11115. 559.143   1
  -1   3 -31 9913.62 1008.64   1
   1  -3  32  155.28 489.297   1
   1  -3  32   68.49 200.375   1
  -1  -3 -32    9.53 459.632   1
   1   3  32  259.93 162.298   1
   1   3  32  230.75 384.904   1
  -1   3 -32  -69.81 666.165   1
   1  -3  33 6751.78 763.799   1
   1  -3  33 7164.84 489.297   1
  -1  -3 -33 6398.79 852.797   1
   1   3  33 7044.68 714.982  -1
   1   3  33 7540.36 509.200   1
  -1   3 -33 5775.44 912.128   1
  -1   3 -33 5272.24 808.110   1
   1  -3  34  938.41 315.133   1
   1  -3  34  549.76 554.262   1
   1   3  34 1166.35 238.227   1
   1   3  34  603.45 412.317   1
  -1  -3 -35  231.58 453.623   1
   1  -4 -35 4622.60 691.700  -1
  -1   4  35 6590.31 535.110   1
   1  -4 -34  -58.88 452.872   1
  -1   4  34   61.70 179.196   1
   1  -4 -33  11209. 957.566   1
  -1  -4  33  12460. 949.304   1
  -1   4  33  13879. 953.811   1
  -1   4  33  15223. 718.738   1
   1  -4 -32  528.73 470.897   1
  -1  -4  32  164.74 239.129   1
  -1  -4  32  588.06 505.069   1
   1   4 -32  199.29 575.666   1
   1   4 -32  901.99 611.716   1
  -1   4  32  223.28 173.038   1
  -1   4  32   52.31 399.549  -1
   1  -4 -31  942.92 501.314   1
  -1  -4  31  874.58 505.820   1
  -1  -4  31 1597.44 256.177   1
   1   4 -31  423.96 558.017   1
   1   4 -31 1865.94 638.002   1
  -1   4  31  766.05 440.480   1
  -1   4  31 1350.36 225.497   1
   1  -4 -30 2615.09 583.552   1
  -1  -4  30 2690.57 287.195   1
   1   4 -30 2462.63 630.116   1
  -1   4  30 2563.65 271.198   1
   1  -4 -29  13440. 1152.08   1
   1  -4 -29  14675. 1056.70   1
  -1  -4  29  14472. 612.091   1
   1   4 -29  16827. 1043.56   1
   1   4 -29  12978. 917.386   1
  -1   4  29  14593. 911.753   1
  -1   4  29  14961. 678.933   1
   1  -4 -28 -244.46 448.366   1
   1  -4 -28  123.36 397.296   1
  -1  -4  28  203.27 170.822   1
  -1  -4  28  983.48 411.941   1
   1   4 -28   82.80 472.024   1
   1   4 -28  761.17 450.619   1
  -1   4  28  -13.38 378.520   1
  -1   4  28  323.66 169.057   1
   1  -4 -27  24074. 1298.16   1
   1  -4 -27  19797. 1274.50   1
  -1  -4  27  21033. 969.582   1
  -1  -4  27  21525. 824.258   1
   1   4 -27  22486. 1147.20   1
   1   4 -27  20007. 969.582   1
  -1   4  27  21284. 1153.59   1
  -1   4  27  21641. 900.487   1
   1  -4 -26  276.04 362.223   1
   1  -4 -26  152.53 438.603   1
  -1  -4  26  383.78 331.393   1
   1   4 -26   61.92 368.944   1
  -1   4  26  -33.32 361.547   1
  -1   4  26  -37.74 161.960   1
   1  -4 -25  175.63 459.632   1
   1  -4 -25  -12.58 355.163  -1
   1   4 -25  128.61 347.277   1
   1   4 -25  425.84 337.251   1
  -1   4  25 -167.59 154.149   1
   1  -4 -24 3027.41 603.830   1
   1  -4 -24 2733.76 524.596   1
  -1  -4  24 3214.42 252.985   1
  -1  -4  24 2254.97 346.751   1
   1   4 -24 2878.33 377.394   1
   1   4 -24 2120.54 401.427   1
  -1   4  24 3138.56 303.417   1
  -1   4  24 2496.05 498.310   1
  -1  -4  23  29583. 1050.32   1
  -1  -4  23  27000. 1048.07   1
   1   4 -23  28885. 1117.91   1
   1   4 -23  29193. 1192.64   1
  -1   4  23  28265. 1363.50   1
   1  -4 -22  500.94 383.402   1
   1  -4 -22 1668.79 517.086   1
  -1  -4  22 1186.63 279.872   1
   1   4 -22  880.21 284.003   1
   1   4 -22 1028.54 281.149   1
  -1   4  22  957.19 386.781   1
  -1   4  22 1718.36 245.813   1
   1  -4 -21  40518. 1756.29   1
   1  -4 -21  41194. 1841.91   1
  -1  -4  21  42734. 1438.23   1
  -1  -4  21  37439. 1322.94   1
   1   4 -21  39354. 1449.12   1
   1   4 -21  41457. 1450.99   1
  -1   4  21  41419. 1759.29   1
  -1   4  21  39166. 1464.14   1
   1  -4 -20  13421. 921.516   1
   1  -4 -20  12032. 823.882   1
  -1  -4  20  11960. 542.621   1
  -1  -4  20  12520. 501.689  -1
   1   4 -20  12557. 601.577   1
   1   4 -20  13410. 577.919   1
  -1   4  20  11904. 606.458   1
  -1   4  20  13462. 858.805   1
   1  -4 -19 2253.10 431.843   1
  -1  -4  19 2878.71 200.413   1
   1   4 -19 2386.03 275.929   1
  -1   4  19 2373.26 274.089   1
   1  -4 -18  814.49 348.404   1
   1  -4 -18 1262.86 387.908   1
  -1  -4  18 1660.91 238.040  -1
  -1  -4  18 1361.62 149.831   1
   1   4 -18 1226.81 199.775   1
   1   4 -18 1169.73 216.485   1
  -1   4  18 1421.70 232.632   1
  -1   4  18 1461.13 392.039   1
   1  -4 -17  44273. 1819.00   1
   1  -4 -17  45775. 1909.12   1
  -1  -4  17  47766. 1568.53   1
  -1  -4  17  47953. 1558.02   1
   1   4 -17  45775. 1543.37   1
   1   4 -17  47202. 1550.51   1
  -1   4  17  45850. 1665.79   1
  -1   4  17  48028. 1920.01   1
   1  -4 -16 6571.53 624.108   1
  -1  -4  16 5366.12 268.794   1
  -1  -4  16 5606.45 245.850   1
   1   4 -16 5426.21 286.519   1
   1   4 -16 5576.41 270.672   1
  -1   4  16 5835.52 533.984   1
   1  -4 -15  93090. 3298.53   1
   1  -4 -15  91626. 3319.56   1
   1   4 -15  94442. 2987.60   1
  -1   4  15  92790. 3273.75   1
  -1   4  15  86782. 2925.27   1
   1  -4 -14  20379. 1004.13   1
  -1   4  14  20943. 1031.54   1
  -1   4  14  17871. 784.077   1
   1  -4 -13  12516. 730.754   1
  -1   4  13  12835. 625.234   1
   1  -4 -12  129.22 244.949   1
  -1   4  12   22.70 153.098   1
  -1   4  11 105896. 3496.43   1
  -1   4  11 117687. 4044.31   1
   1  -4 -10  585.43 242.771   1
  -1   4  10  493.43 163.913   1
   1  -4  -9  49305. 1829.14   1
   1  -4  -9  49230. 1855.05   1
  -1   4   9  50507. 1772.06   1
  -1   4   9  52835. 1951.93   1
  -1   4   8  14281. 734.134   1
  -1   4   8  14217. 646.263   1
   1  -4  -7  42170. 1579.80   1
   1  -4  -7  42170. 1502.06   1
  -1   4   7  43147. 1621.85   1
  -1   4   7  44686. 1585.43   1
   1  -4  -6 6331.20 374.727   1
  -1   4   6 5978.21 428.088   1
   1  -4  -5 301126. 9474.27   1
   1  -4  -5 283590. 8997.36   1
   1   4  -5 307285. 9564.39   1
   1   4  -5 292902. 9106.26   1
  -1   4   5 296545. 9339.08   1
  -1   4   5 292039. 9263.98   1
   1  -4  -4  20687. 812.992   1
   1  -4  -4  21600. 900.863   1
  -1  -4   4  20770. 725.497   1
  -1  -4   4  19602. 697.333   1
   1   4  -4  18581. 642.132   1
   1   4  -4  19823. 706.721   1
  -1   4   4  21378. 899.361  -1
  -1   4   4  20792. 820.878   1
   1  -4  -3  74615. 2517.83   1
   1  -4  -3  75666. 2500.56   1
  -1  -4   3  76230. 2460.01   1
  -1  -4   3  76605. 2476.90   1
   1   4  -3  77995. 2521.59   1
   1   4  -3  76643. 2452.12   1
  -1   4   3  77469. 2557.26   1
  -1   4   3  81149. 2734.88   1
   1  -4  -2  22324. 880.585   1
   1  -4  -2  20113. 774.314  -1
  -1  -4   2  22189. 820.878   1
  -1   4   2  23256. 929.402   1
  -1   4   2  20841. 794.967   1
   1  -4  -1 109125. 3539.61   1
   1  -4  -1 113706. 3652.64   1
  -1  -4   1 108562. 3505.44   1
   1   4  -1 118288. 3770.18   1
  -1   4   1 112129. 3656.77  -1
  -1   4   1 113143. 3627.11   1
   1  -4   0  363.69 118.288   1
   1  -4   0  213.44 143.485   1
  -1  -4   0  101.31 161.059   1
  -1  -4   0  303.30 144.874   1
   1   4   0  106.23 108.524   1
   1   4   0   78.18 140.668   1
  -1   4   0  252.05 109.726  -1
  -1   4   0  274.09 155.651   1
   1  -4   1 274239. 8599.32   1
  -1  -4  -1 266879. 8419.07   1
  -1  -4  -1 271648. 8569.27   1
   1   4   1 284040. 8907.24   1
   1   4   1 271423. 8565.52   1
  -1   4  -1 281036. 8779.56   1
   1  -4   2 6256.10 317.086   1
  -1  -4  -2 5471.27 364.889   1
   1   4   2 4814.11 295.606   1
   1   4   2 5456.25 366.353   1
   1  -4   3  17923. 648.141   1
   1  -4   3  16335. 609.462   1
  -1  -4  -3  17852. 774.689   1
  -1  -4  -3  17773. 775.440   1
   1   4   3  19035. 755.914   1
   1   4   3  18505. 797.220   1
  -1   4  -3  17413. 669.545   1
  -1   4  -3  18573. 657.529   1
   1  -4   4  26684. 907.622   1
   1  -4   4  26846. 917.761   1
  -1  -4  -4  28059. 1113.78   1
  -1  -4  -4  29001. 1131.05   1
   1   4   4  27818. 1098.01   1
   1   4   4  28111. 1052.57   1
  -1   4  -4  27488. 963.574   1
  -1   4  -4  27946. 930.153   1
   1  -4   5 119039. 3748.78   1
  -1  -4  -5 125385. 4126.92   1
  -1  -4  -5 128389. 4232.06   1
   1   4   5 132219. 4337.21  -1
   1   4   5 136237. 4401.05   1
  -1   4  -5 138415. 4325.94   1
  -1   4  -5 133871. 4232.06   1
   1  -4   6 6334.95 279.759   1
   1  -4   6 7044.68 282.764   1
   1   4   6 6425.08 443.484   1
  -1   4  -6 6428.83 290.724   1
   1  -4   7 149005. 4660.15   1
  -1  -4  -7 155013. 5080.73   1
  -1  -4  -7 156628. 5129.55   1
   1   4   7 159031. 5118.28   1
   1   4   7 156740. 5129.55   1
  -1   4  -7 161171. 5058.20   1
   1  -4   8 5317.31 216.673   1
  -1  -4  -8 5170.85 419.076   1
  -1  -4  -8 6778.06 496.057   1
   1   4   8 5257.22 360.345   1
   1   4   8 5422.45 437.852   1
  -1   4  -8 5918.13 257.491   1
   1  -4   9  184.94  68.006   1
  -1  -4  -9  -96.24 239.279   1
  -1  -4  -9  262.49 215.509   1
   1   4   9  -17.16 215.771   1
   1   4   9  202.55 154.975   1
  -1   4  -9   26.76  91.401   1
   1  -4  10  10150. 364.626   1
  -1  -4 -10  10101. 619.601   1
   1   4  10 9594.43 503.942   1
   1   4  10 9909.87 631.242   1
   1  -4  11  65678. 2146.82   1
   1  -4  11  63875. 2024.41   1
  -1  -4 -11  61322. 2254.97   1
   1   4  11  58768. 2044.68   1
   1   4  11  67931. 2513.33   1
  -1   4 -11  58656. 1886.59   1
  -1   4 -11  60758. 1977.84   1
   1  -4  12 2139.69 138.678   1
  -1  -4 -12 1620.35 319.226   1
  -1   4 -12 1045.06 152.234   1
  -1   4 -12  920.77 159.594   1
   1  -4  13  91889. 2906.49   1
  -1  -4 -13  90800. 3198.65   1
   1   4  13  91138. 3063.08   1
  -1   4 -13  87082. 2774.31   1
  -1   4 -13  86218. 2789.71   1
   1  -4  14  12185. 463.387   1
  -1  -4 -14  13331. 794.216   1
   1   4  14  12801. 626.361   1
   1   4  14  12873. 773.563   1
  -1   4 -14  12798. 548.629   1
  -1   4 -14  14086. 552.760  -1
   1  -4  15 4235.82 229.027   1
  -1  -4 -15 4119.41 515.208   1
   1   4  15 4382.27 472.775   1
  -1   4 -15 3747.27 287.457   1
   1  -4  16  529.48 131.806   1
  -1  -4 -16 1025.53 339.654   1
  -1  -4 -16 1372.51 404.055   1
   1   4  16  363.99 180.360   1
   1   4  16  947.80 348.516   1
  -1   4 -16  766.05 211.716   1
   1  -4  17  59294. 1944.80   1
   1  -4  17  66166. 2156.96   1
  -1  -4 -17  62298. 2390.53   1
  -1  -4 -17  60533. 2337.96   1
   1   4  17  65678. 2456.25   1
   1   4  17  62711. 2191.14   1
  -1   4 -17  63462. 2094.63   1
  -1   4 -17  61735. 2114.16   1
   1  -4  18 4539.99 264.025   1
   1  -4  18 3498.31 268.494   1
  -1  -4 -18 4123.17 519.339   1
   1   4  18 4671.42 359.632   1
  -1   4 -18 3634.62 341.720   1
  -1   4 -18 3627.48 304.281   1
   1  -4  19  62073. 2044.31   1
   1  -4  19  63763. 2120.16   1
  -1  -4 -19  66992. 2570.03   1
  -1  -4 -19  66091. 2548.63   1
   1   4  19  65415. 2469.77   1
   1   4  19  61021. 2137.81   1
  -1   4 -19  64401. 2247.46   1
  -1   4 -19  66429. 2212.54   1
   1  -4  20 7018.39 356.477   1
   1  -4  20 6180.99 391.288   1
  -1  -4 -20 8081.10 695.831   1
  -1  -4 -20 6282.38 620.352   1
   1   4  20 6102.13 589.936   1
   1   4  20 6488.92 420.953   1
  -1   4 -20 6733.00 408.561   1
  -1   4 -20 5384.90 438.978   1
   1  -4  21 1687.94 290.161   1
   1  -4  21 2399.17 219.752   1
  -1  -4 -21 2371.38 478.407   1
  -1  -4 -21 2188.51 458.505   1
   1   4  21 2049.19 434.096   1
   1   4  21 2197.52 265.940   1
  -1   4 -21 1794.22 294.968   1
  -1   4 -21 1389.03 330.154   1
   1  -4  22  504.69 282.801  -1
   1  -4  22  365.79 160.721   1
  -1  -4 -22  695.46 418.700  -1
  -1  -4 -22  648.52 402.178   1
   1   4  22  452.12 191.138   1
   1   4  22  560.65 386.030   1
  -1   4 -22  284.38 299.850   1
  -1   4 -22  907.25 281.862   1
   1  -4  23  64476. 2212.16   1
   1   4  23  60683. 2130.68   1
   1   4  23  63763. 2457.00   1
  -1   4 -23  62486. 2170.48   1
   1  -4  24 -163.05 152.459   1
   1  -4  24  112.24 307.360   1
  -1  -4 -24 -183.93 416.447   1
  -1  -4 -24    6.33 386.781   1
   1   4  24  183.59 158.881   1
   1   4  24   27.74 317.574   1
  -1   4 -24  156.40 334.585  -1
  -1   4 -24 -113.29 300.112   1
   1  -4  25  12291. 699.586   1
   1  -4  25  12906. 579.797   1
  -1  -4 -25  12610. 962.072   1
  -1  -4 -25  13034. 903.491   1
  -1   4 -25  12073. 679.684   1
  -1   4 -25  13038. 823.507   1
   1  -4  26  975.59 388.659   1
   1  -4  26  351.82 189.786   1
  -1  -4 -26  658.66 488.922   1
  -1  -4 -26 1035.67 420.578   1
   1   4  26  445.74 178.145   1
   1   4  26  576.79 355.050   1
  -1   4 -26  531.73 352.121   1
  -1   4 -26  582.80 414.194   1
   1  -4  27 5835.52 362.936   1
  -1  -4 -27 4423.58 685.692   1
  -1  -4 -27 4727.75 628.614   1
   1   4  27 4442.35 542.621   1
   1   4  27 5366.12 372.775   1
  -1   4 -27 4757.79 645.512   1
   1  -4  28 2367.25 487.795   1
   1  -4  28 3155.46 284.866  -1
  -1  -4 -28 2441.98 597.821   1
   1   4  28 2464.51 460.007   1
  -1   4 -28 2532.48 506.196   1
  -1   4 -28 2367.25 588.434   1
   1  -4  29  31780. 1362.00   1
   1  -4  29  31115. 1159.97   1
  -1  -4 -29  29929. 1570.41   1
   1   4  29  26936. 1053.70   1
   1   4  29  26692. 1321.07   1
  -1   4 -29  27090. 1293.65   1
  -1   4 -29  30327. 1547.50   1
   1  -4  30   86.56 194.330   1
   1  -4  30 -256.03 434.848   1
  -1  -4 -30  438.98 449.493   1
   1   4  30  -41.53 399.173   1
   1   4  30  -65.90 140.931   1
  -1   4 -30  410.44 558.768   1
  -1   4 -30  382.28 457.378   1
   1  -4  31 1426.21 500.187   1
   1  -4  31  972.59 260.871   1
  -1  -4 -31 1497.93 504.318  -1
   1   4  31 1182.88 215.771   1
   1   4  31  932.03 434.848   1
  -1   4 -31  980.10 631.618   1
  -1   4 -31 1467.14 597.070   1
   1  -4  32  797.97 261.997   1
   1  -4  32  505.82 495.306   1
  -1  -4 -32  427.71 490.424   1
   1   4  32  687.19 215.509   1
   1   4  32  515.96 447.991   1
  -1   4 -32  189.75 635.373   1
  -1   4 -32  939.17 647.765   1
  -1  -4 -33 2063.08 553.886   1
   1   4  33 2657.15 299.136   1
  -1  -4 -34 2897.86 563.649   1
   1   4  34 3950.43 402.553   1
   1  -5 -33  467.52 456.252  -1
  -1   5  33  503.57 221.292   1
   1  -5 -32 1499.06 534.359   1
  -1   5  32 1760.42 265.264   1
   1   5 -31 4600.07 695.080   1
  -1   5  31 7093.50 698.835   1
   1  -5 -30 -102.25 397.296   1
  -1  -5  30  -83.18 192.001   1
  -1  -5  30  125.95 297.521   1
   1   5 -30 -298.80 612.091   1
   1   5 -30  637.63 514.081   1
  -1   5  30  -53.81 142.734   1
  -1   5  30 -154.56 385.279   1
   1  -5 -29 3655.65 574.539   1
  -1  -5  29 3592.56 264.776   1
  -1  -5  29 2833.64 355.088  -1
   1   5 -29 3294.03 566.654   1
   1   5 -29 1571.16 602.328   1
  -1   5  29 3133.31 300.939   1
  -1   5  29 3587.68 567.029   1
   1  -5 -28  13286. 968.080   1
  -1  -5  28  12828. 513.330   1
   1   5 -28  13274. 785.579   1
  -1   5  28  10984. 558.768   1
  -1   5  28  11814. 867.817   1
   1  -5 -27  603.83 520.090   1
  -1  -5  27  388.66 150.131   1
  -1  -5  27  392.41 228.764  -1
   1   5 -27  269.02 388.284   1
   1  -5 -26 3295.53 650.018   1
   1  -5 -26 4168.23 597.821   1
  -1  -5  26 4010.51 240.330   1
   1   5 -26 3400.30 419.076  -1
  -1   5  26 3242.58 309.463   1
  -1   5  26 4273.37 570.784   1
  -1  -5  25  13725. 513.330   1
   1   5 -25  12629. 631.618   1
  -1   5  25  12625. 617.724   1
  -1   5  25  12689. 877.205   1
   1  -5 -24 1525.35 439.354   1
   1  -5 -24 1598.95 536.612   1
  -1  -5  24  686.82 151.896   1
  -1  -5  24 1111.90 140.368   1
   1   5 -24 1049.19 283.139   1
   1   5 -24  762.67 297.972   1
  -1   5  24 1227.94 223.319   1
  -1   5  24 1447.24 445.362   1
   1  -5 -23 3849.04 533.608   1
   1  -5 -23 4051.82 647.390   1
   1   5 -23 3747.27 358.242   1
   1   5 -23 3036.05 292.640   1
  -1   5  23 3656.77 325.798   1
  -1   5  23 4577.54 593.315   1
   1  -5 -22  38716. 1721.37  -1
   1  -5 -22  41757. 1923.77   1
  -1  -5  22  39617. 1291.40  -1
  -1   5  22  39166. 1464.51   1
  -1   5  22  40668. 1764.93   1
   1  -5 -21 1893.35 437.852   1
   1  -5 -21 1120.54 452.872   1
  -1   5  21 2075.85 463.011   1
  -1   5  21 1650.02 270.184   1
   1  -5 -20 1282.39 450.244   1
   1  -5 -20 1407.43 394.667   1
  -1   5  20 1668.42 427.337   1
  -1   5  20 1795.72 257.904   1
   1  -5 -19  19827. 1146.07   1
   1  -5 -19  21123. 1125.80   1
  -1   5  19  21630. 1132.93   1
  -1   5  19  19309. 844.160   1
   1  -5 -18  12291. 812.617   1
   1  -5 -18  12512. 891.850   1
  -1   5  18  11570. 603.830   1
  -1   5  18  13612. 865.189  -1
   1  -5 -17  17469. 978.595   1
  -1   5  17  18134. 810.739   1
   1  -5 -16  46827. 1898.23   1
  -1   5  16  45362. 1661.66   1
   1  -5 -15  10965. 740.142   1
  -1   5  15  11374. 594.066   1
   1  -5 -13  75066. 2730.00   1
  -1   5  13  77844. 2658.65   1
   1  -5 -12  26977. 1262.86   1
   1  -5 -12  25013. 1155.09   1
   1  -5 -11 8377.76 587.682  -1
   1  -5 -11 8790.83 638.753   1
  -1   5  11 9444.23 653.398   1
  -1   5  11 8633.11 497.559   1
   1  -5 -10  42997. 1720.61   1
   1  -5 -10  41832. 1639.88   1
  -1   5  10  44424. 1613.59   1
  -1   5  10  46639. 1822.75   1
   1  -5  -9  65978. 2375.51  -1
   1  -5  -9  61397. 2282.39  -1
  -1   5   9  69470. 2510.70   1
  -1   5   9  71986. 2456.25   1
   1  -5  -8 2145.70 325.910   1
  -1   5   8 2798.34 277.581   1
  -1   5   7 210101. 6826.88   1
  -1   5   7 212692. 6789.33   1
   1  -5  -6  63875. 2270.37   1
  -1  -5   6  69884. 2233.57   1
   1   5  -6  63725. 2044.31   1
  -1   5   6  61209. 2104.39   1
  -1   5   6  66316. 2364.25   1
   1  -5  -5  157.75 147.991   1
   1  -5  -5  318.66 209.838   1
  -1  -5   5  208.30 116.297   1
  -1  -5   5  198.72 129.027   1
   1   5  -5  432.97 128.952   1
   1   5  -5  410.81  90.499   1
  -1   5   5   98.80 211.040   1
  -1   5   5  163.50 149.042   1
   1  -5  -4  59820. 2041.68   1
  -1  -5   4  64251. 2114.53   1
  -1  -5   4  62711. 2066.46  -1
   1   5  -4  60721. 1966.58   1
   1   5  -4  64476. 2121.67   1
  -1   5   4  64852. 2289.15   1
   1  -5  -3  78520. 2602.70   1
   1  -5  -3  74089. 2544.50   1
  -1  -5   3  75554. 2491.17   1
   1   5  -3  76605. 2472.77   1
  -1   5   3  73113. 2528.35   1
  -1   5   3  78220. 2603.45   1
   1  -5  -2  199.70 185.655   1
   1  -5  -2  549.76 150.544   1
   1   5  -2  423.96 118.663   1
   1   5  -2  326.17 161.960   1
  -1   5   2  460.01 147.578   1
  -1   5   2  469.77 208.562   1
   1  -5  -1  53286. 1867.07   1
   1  -5  -1  57829. 1943.30   1
  -1  -5   1  54037. 1865.19   1
  -1  -5   1  50432. 1761.55   1
   1   5  -1  55802. 1858.43   1
   1   5  -1  57341. 1970.33   1
  -1   5   1  55914. 1972.96   1
  -1   5   1  56703. 1913.63   1
   1  -5   0  96132. 3119.04   1
   1  -5   0  99624. 3280.13   1
  -1  -5   0 101164. 3347.73   1
  -1  -5   0  97822. 3241.08   1
   1   5   0 100075. 3243.71  -1
   1   5   0  99286. 3282.39   1
  -1   5   0 101389. 3357.11   1
  -1   5   0 100225. 3242.58   1
   1  -5   1  15163. 606.083   1
   1  -5   1  13695. 602.703   1
  -1  -5  -1  12452. 621.103   1
  -1  -5  -1  13924. 660.908   1
   1   5   1  15047. 695.831   1
   1   5   1  16196. 665.039   1
  -1   5  -1  15456. 610.589   1
  -1   5  -1  14656. 657.904   1
  -1  -5  -2  17244. 785.204   1
  -1  -5  -2  18776. 832.519   1
   1   5   2  18659. 757.040   1
   1   5   2  21622. 922.267   1
  -1   5  -2  17980. 671.798   1
  -1   5  -2  18449. 760.420   1
   1  -5   3  21104. 797.220   1
  -1  -5  -3  19163. 862.560   1
  -1  -5  -3  21746. 940.292   1
   1   5   3  23605. 918.512   1
   1   5   3  22933. 970.709   1
  -1   5  -3  22685. 802.478   1
   1  -5   4  10616. 463.011   1
  -1  -5  -4 9365.37 574.164   1
   1   5   4  10800. 594.817   1
  -1   5  -4  10342. 410.439   1
   1  -5   5  15959. 605.707   1
  -1  -5  -5  16158. 785.955   1
  -1  -5  -5  14457. 745.024   1
   1   5   5  17507. 826.886   1
   1   5   5  19204. 797.596   1
  -1   5  -5  19144. 665.414   1
  -1   5  -5  17514. 683.815   1
   1  -5   6 106421. 3363.12   1
   1  -5   6 114795. 3622.98   1
  -1  -5  -6 115321. 3886.59   1
  -1  -5  -6 119677. 4014.27   1
   1   5   6 121592. 4070.59   1
   1   5   6 121968. 3984.22   1
  -1   5  -6 120428. 3841.53   1
  -1   5  -6 125235. 3927.90   1
   1  -5   7  25141. 845.662   1
   1  -5   7  22967. 778.445   1
  -1  -5  -7  26455. 1143.45   1
   1   5   7  26068. 1028.91   1
  -1   5  -7  26008. 862.936   1
  -1   5  -7  25892. 906.496  -1
  -1  -5  -8  16647. 864.813   1
  -1  -5  -8  15013. 790.837   1
   1   5   8  13567. 753.661  -1
   1   5   8  12967. 615.095   1
  -1   5  -8  13939. 523.469   1
   1  -5   9  92527. 2915.51   1
  -1  -5  -9  95982. 3324.82   1
  -1  -5  -9  89673. 3144.95   1
   1   5   9  99887. 3451.74   1
   1   5   9 101727. 3375.51   1
  -1   5  -9  97972. 3110.77   1
  -1   5  -9 109576. 3469.02   1
   1  -5  10  17724. 588.058   1
   1  -5  10  16774. 580.923   1
  -1  -5 -10  16575. 868.944   1
  -1  -5 -10  15359. 830.266   1
   1   5  10  17867. 791.212   1
   1   5  10  18701. 944.798   1
   1  -5  11 8610.58 300.225   1
  -1  -5 -11 8918.50 631.242   1
  -1  -5 -11 7728.12 602.703   1
   1   5  11 9635.74 674.051   1
   1   5  11 9891.09 538.490   1
  -1  -5 -12  60496. 2281.26   1
  -1  -5 -12  58017. 2219.68   1
   1   5  12  59782. 2265.86   1
   1   5  12  56515. 1999.25   1
  -1  -5 -13 3380.39 454.374   1
  -1  -5 -14  27334. 1271.50   1
   1   5  14  25745. 1044.31   1
   1  -5  15  55464. 1765.30   1
  -1  -5 -15  54600. 2150.58   1
   1   5  15  54938. 1959.82   1
  -1   5 -15  55088. 1783.70   1
   1   5  16  34311. 1315.06   1
  -1   5 -16  32403. 1091.25   1
   1  -5  17 6297.40 266.804   1
   1  -5  17 6211.03 257.153   1
  -1  -5 -17 6500.18 606.083   1
   1   5  17 6349.98 423.207   1
  -1   5 -17 6098.38 326.098   1
  -1   5 -17 5812.99 314.495  -1
   1  -5  18  18671. 654.900   1
   1  -5  18  19624. 677.806   1
  -1  -5 -18  20120. 1072.85   1
  -1  -5 -18  21089. 1161.47   1
   1   5  18  17987. 796.469   1
   1   5  18  20094. 1087.87   1
  -1   5 -18  19715. 738.640   1
  -1   5 -18  19681. 761.171   1
   1  -5  19 9346.59 371.723   1
   1  -5  19 9981.21 398.422   1
  -1  -5 -19  10548. 805.857   1
  -1  -5 -19  11217. 787.833  -1
   1   5  19  10188. 553.135   1
   1   5  19  10237. 731.505   1
  -1   5 -19 8952.30 452.121   1
  -1   5 -19 8941.04 458.505   1
   1  -5  20  251.75 124.521   1
  -1  -5 -20  741.64 405.182   1
  -1  -5 -20 1132.18 410.439  -1
   1   5  20  160.76 169.808   1
   1   5  20  883.96 380.022  -1
  -1   5 -20  580.92 235.373   1
   1  -5  21  40143. 1339.09  -1
  -1  -5 -21  43898. 2011.26   1
  -1  -5 -21  37739. 1723.24   1
   1   5  21  38190. 1661.66   1
   1   5  21  38415. 1455.88   1
   1  -5  22 7499.05 371.160   1
   1  -5  22 8358.99 370.071   1
  -1  -5 -22 8017.27 738.640   1
  -1  -5 -22 8434.09 748.403   1
   1   5  22 8618.09 491.550   1
   1   5  22 9271.49 733.007   1
  -1   5 -22 6774.31 488.171   1
  -1   5 -22 7668.04 501.314   1
   1  -5  23  382.65 200.000   1
   1  -5  23  722.49 154.938   1
  -1  -5 -23  608.71 410.063   1
   1   5  23  829.89 204.731   1
  -1   5 -23  556.51 368.794   1
  -1   5 -23  778.07 309.538   1
   1  -5  24 6808.10 336.988   1
  -1  -5 -24 7217.42 752.534   1
  -1  -5 -24 7630.48 712.729   1
   1   5  24 6755.53 422.080   1
   1   5  24 6849.41 632.744   1
  -1   5 -24 6207.28 510.326   1
  -1   5 -24 5595.19 536.988   1
   1  -5  25 9864.80 500.187   1
   1  -5  25  10759. 459.256   1
   1   5  25  10725. 790.086   1
   1   5  25  10556. 544.123   1
  -1   5 -25 9068.71 635.373   1
  -1   5 -25 8764.54 671.798   1
   1  -5  26  565.15 257.979   1
   1  -5  26  397.30 161.247   1
  -1  -5 -26 1148.33 504.318   1
   1   5  26  101.73 373.413   1
  -1   5 -26  -32.32 400.676   1
  -1   5 -26   26.94 506.196   1
   1  -5  27 9898.60 458.505   1
   1  -5  27 9568.15 528.727   1
  -1  -5 -27  11506. 897.483   1
   1  -5  28 7634.24 399.924   1
   1  -5  28 6503.94 485.918   1
  -1  -5 -28 8231.31 782.575   1
   1   5  28 6669.16 696.207   1
   1   5  28 6312.42 402.553   1
  -1   5 -28 5996.99 675.929  -1
   1  -5  29  274.84 330.905   1
  -1  -5 -29  931.28 455.501   1
   1   5  29  695.46 185.956   1
   1   5  29  527.22 402.178   1
  -1   5 -29  884.72 737.138   1
  -1   5 -29  290.35 455.501   1
   1  -5  30 6349.98 538.490   1
  -1  -5 -30 5542.62 729.628   1
   1   5  30 7668.04 700.337  -1
  -1   5 -30 4964.32 881.336   1
   1  -5  31 6214.79 568.156   1
  -1  -5 -31 6781.82 747.652   1
   1   5  31 6590.31 693.578   1
   1   5  31 8114.90 472.775   1
  -1  -5 -32  668.42 477.281   1
   1   5  32  120.43 170.785   1
  -1  -5 -33 2152.46 576.042   1
   1   5  33 3672.92 408.186   1
   1  -6 -32 1859.56 511.828   1
  -1   6  32 2410.06 323.657   1
   1  -6 -31 -429.97 426.211   1
  -1   6  31   69.28 186.256   1
   1  -6 -30  13706. 1000.00   1
  -1   6  30  15929. 730.003   1
  -1   6  30  15103.  999.25   1
   1  -6 -29  353.25 395.043   1
   1  -6 -28   18.62 428.088   1
  -1   6  28 -139.80 143.072   1
  -1   6  28   14.75 401.427   1
  -1   6  27 3512.20 305.557   1
  -1   6  27 3481.41 586.931   1
   1  -6 -26 9380.39 800.976   1
  -1   6  26 9470.51 783.702   1
  -1   6  26 7923.39 467.142   1
   1  -6 -25  426.21 502.065   1
  -1   6  25  -34.30 340.217   1
   1  -6 -24  25490. 1355.24   1
   1  -6 -24  24442. 1456.25   1
  -1   6  24  23811. 1251.59   1
  -1   6  24  25359. 1028.91   1
   1  -6 -23 2363.12 504.693   1
   1  -6 -23 2018.77 570.784   1
  -1   6  23 2716.48 290.311   1
  -1   6  23 2939.54 533.608   1
   1  -6 -22  227.07 485.542   1
   1  -6 -22  236.54 370.109   1
  -1   6  22  558.77 418.700   1
  -1   6  22  751.78 204.356   1
   1  -6 -21  201.65 339.692   1
   1  -6 -21  458.88 476.905   1
  -1   6  21  318.78 398.798   1
  -1   6  21 1071.35 220.390   1
   1  -6 -20  46902. 1961.32   1
  -1   6  20  49944. 2074.35   1
  -1   6  20  47015. 1711.23   1
   1  -6 -19  869.32 455.125   1
   1  -6 -18  29087. 1398.80   1
  -1   6  18  29497. 1174.61   1
   1  -6 -17 1748.78 421.329   1
  -1   6  17 2207.66 273.075  -1
   1  -6 -16 1246.71 354.262   1
  -1   6  16  838.15 222.756   1
   1  -6 -15  24634. 1204.66  -1
  -1   6  15  23462. 978.595   1
  -1   6  15  24844. 1298.91   1
   1  -6 -14  84641. 3070.22   1
   1  -6 -14  88058. 3312.43   1
  -1   6  14  88171. 2990.23   1
  -1   6  14  92152. 3312.43   1
   1  -6 -13 1454.00 375.516   1
   1  -6 -13 1727.75 442.358   1
  -1   6  13 1197.90 358.280   1
  -1   6  13 1032.29 220.278   1
   1  -6 -12 9883.58 758.167   1
   1  -6 -12  10762. 783.326   1
  -1   6  12 9984.97 695.831   1
   1  -6 -11  29317. 1312.80   1
   1  -6 -11  28915. 1364.25   1
  -1   6  11  32001. 1249.72  -1
  -1   6  11  33038. 1436.72  -1
   1  -6 -10  10575. 737.889   1
   1  -6 -10 9868.56 662.035   1
  -1   6  10 9628.23 531.355   1
  -1   6  10  10372. 695.456   1
   1  -6  -9 5752.90 506.571   1
   1  -6  -9 5309.80 541.870   1
  -1   6   9 6462.63 548.629   1
  -1   6   9 5099.51 372.174   1
   1  -6  -8 131543. 4502.44   1
   1  -6  -8 128990. 4348.48   1
  -1   6   8 134435. 4389.78   1
  -1   6   8 137664. 4633.87   1
   1  -6  -7  304.24 239.166   1
   1  -6  -7 -228.39 320.052   1
  -1  -6   7  384.15 122.681   1
   1   6  -7  957.57 141.570   1
  -1   6   7  622.23 277.844   1
  -1   6   7  699.21 195.381   1
   1  -6  -6  17217. 923.394   1
   1  -6  -6  16613. 832.894   1
  -1  -6   6  16260. 613.969   1
  -1  -6   6  17518. 663.912   1
   1   6  -6  16500. 584.678   1
   1   6  -6  17120. 650.769   1
  -1   6   6  17266. 891.475   1
  -1   6   6  16395. 729.252   1
   1  -6  -5  29782. 1236.95   1
  -1  -6   5  28622. 1022.15   1
   1   6  -5  32212. 1152.83   1
   1   6  -5  31570. 1070.22   1
   1  -6  -4  16448. 798.347   1
  -1  -6   4  16583. 701.088  -1
  -1  -6   4  16613. 684.190   1
   1   6  -4  17101. 642.883   1
   1   6  -4  17311. 712.729   1
  -1   6   4  16541. 719.864   1
  -1   6   4  18291. 891.475   1
   1  -6  -3  795.72 247.240   1
   1  -6  -3  620.35 158.242   1
  -1  -6   3  582.05 229.478   1
  -1  -6   3  434.85 191.964   1
   1   6  -3  674.05 207.360   1
   1   6  -3  466.39 133.196   1
  -1   6   3  885.47 186.481   1
  -1   6   3  770.18 253.135   1
   1  -6  -2 127525. 4119.41   1
  -1  -6   2 130041. 4250.84   1
  -1  -6   2 135711. 4404.80   1
   1   6  -2 137401. 4461.13   1
   1   6  -2 135186. 4318.43   1
  -1   6   2 134510. 4453.62   1
   1  -6  -1  15772. 770.183   1
   1  -6  -1  16605. 686.443   1
  -1  -6   1  16594. 740.893   1
   1   6  -1  17897. 713.105   1
  -1   6   1  16564. 692.076  -1
  -1   6   1  15753. 757.040   1
   1  -6   0  18828. 742.020   1
   1  -6   0  18021. 796.469   1
  -1  -6   0  20383. 900.863   1
  -1  -6   0  19651. 861.058   1
   1   6   0  21123. 907.247   1
   1   6   0  20717. 811.490   1
  -1   6   0  21078. 819.000   1
  -1   6   0  19294. 856.176   1
   1  -6   1  18032. 707.097   1
   1  -6   1  18318. 790.837   1
  -1  -6  -1  16342. 785.955   1
   1   6   1  18821. 850.919   1
   1   6   1  18798. 760.795   1
  -1   6  -1  19275. 750.656   1
  -1   6  -1  18539. 820.878   1
   1  -6   2  61096. 2028.54   1
  -1  -6  -2  67818. 2424.33   1
   1   6   2  65227. 2305.29   1
  -1   6  -2  64927. 2142.32   1
  -1  -6  -3 3045.81 402.929   1
  -1  -6  -3 3754.41 392.414   1
   1   6   3 2841.15 352.572  -1
   1   6   3 2111.15 238.077   1
  -1   6  -3 1997.37 256.252   1
  -1   6  -3 1891.85 181.149   1
   1  -6   4 124859. 4006.76   1
   1  -6   4 124559. 3965.45   1
  -1  -6  -4 118963. 4021.78   1
  -1  -6  -4 117461. 3957.94   1
   1   6   4 131318. 4273.37   1
   1   6   4 129328. 4325.94   1
  -1   6  -4 132520. 4198.27   1
  -1   6  -4 127525. 4138.19   1
   1  -6   5 3268.87 251.445   1
  -1  -6  -5 2826.51 365.565   1
  -1   6  -5 3628.61 213.443   1
   1  -6   6 8426.58 398.047   1
   1  -6   6 7776.94 349.155   1
  -1  -6  -6 8888.46 628.989   1
  -1  -6  -6 8880.95 589.560   1
   1   6   6 9402.92 615.095   1
   1   6   6 8895.97 491.550   1
  -1   6  -6 9237.69 450.995   1
  -1   6  -6 9500.55 378.145   1
   1  -6   7 1901.24 195.268   1
  -1  -6  -7 1600.82 371.198   1
  -1  -6  -7 2196.77 359.143  -1
   1   6   7 2591.44 382.275   1
   1   6   7 3351.48 308.374   1
  -1   6  -7 2939.91 234.247   1
   1  -6   8  76305. 2424.71   1
   1  -6   8  70559. 2251.59   1
  -1  -6  -8  77394. 2816.75   1
  -1  -6  -8  75441. 2716.48  -1
   1   6   8  80285. 2722.12   1
   1   6   8  83102. 2948.18   1
  -1   6  -8  79384. 2516.33   1
  -1   6  -8  82388. 2659.78   1
  -1  -6  -9  375.52 274.465   1
  -1  -6  -9   86.29 294.855   1
   1   6   9  290.80 278.107   1
   1   6   9 -160.76 152.459   1
  -1   6  -9   96.88 105.220   1
  -1  -6 -10  57078. 2207.66   1
  -1  -6 -10  55126. 2114.16   1
   1   6  10  60571. 2131.80   1
   1   6  10  58092. 2198.27   1
  -1  -6 -11 2445.74 463.011   1
   1   6  11 2775.44 429.966   1
  -1  -6 -12 2431.09 441.982   1
  -1  -6 -12 2023.28 397.296  -1
   1   6  12 1678.56 386.781   1
   1   6  12 1652.65 248.554   1
  -1  -6 -13  998.50 383.777   1
  -1  -6 -13 1618.47 389.786   1
   1   6  13 1882.84 405.557  -1
   1   6  13 1947.05 263.762   1
  -1  -6 -14  66091. 2511.08   1
   1   6  14  68870. 2387.91   1
  -1  -6 -15 -393.54 279.910   1
  -1  -6 -15 -494.93 319.489   1
   1   6  15 -111.23 166.016   1
   1   6  15 -210.93 323.620   1
  -1  -6 -16  38528. 1671.80   1
  -1  -6 -16  39054. 1799.85   1
   1   6  16  40743. 1514.83   1
  -1  -6 -17 1111.53 394.292   1
   1   6  17 1162.22 221.029   1
  -1  -6 -18 1561.40 436.350   1
   1   6  18 2537.36 284.040   1
   1   6  19 4033.04 385.655   1
  -1  -6 -20  44461. 1905.37   1
   1   6  20  42358. 1562.52   1
   1   6  20  45926. 1946.30   1
  -1  -6 -21  682.31 425.084   1
   1   6  21  355.13 185.242   1
  -1  -6 -22 8246.33 787.457   1
  -1  -6 -22 9263.98 743.522  -1
   1   6  22 8298.90 484.040   1
   1   6  22 8997.36 758.542   1
   1   6  23 6485.16 615.471   1
   1   6  23 5831.76 393.165  -1
  -1  -6 -24 5812.99 754.036   1
  -1  -6 -24 5512.57 676.304   1
   1   6  24 6594.06 644.010  -1
   1   6  24 6500.18 431.843   1
  -1  -6 -25 2644.38 511.077   1
   1   6  25 2631.99 282.088   1
   1   6  25 2890.72 509.200   1
  -1  -6 -26  13699. 972.211   1
   1   6  26  12050. 595.193   1
   1   6  27 1318.44 221.367   1
   1   6  27 1366.13 428.839   1
  -1  -6 -28 7848.28 787.833   1
   1   6  28 8441.60 737.138   1
   1   6  28 7345.09 446.864   1
  -1  -6 -29 1659.78 483.289   1
  -1  -6 -30 5835.52 691.325   1
   1   6  30 6143.44 423.582   1
  -1  -6 -31 -158.92 400.300   1
   1   6  31  -84.90 176.380   1
   1  -7 -30 -446.86 399.173   1
  -1   7  30  295.72 190.499   1
  -1   7  29  315.92 171.123   1
   1  -7 -28  11851. 927.149   1
  -1   7  28  13748. 940.292   1
  -1   7  28  13714. 657.904   1
   1  -7 -27    3.91 359.256   1
  -1   7  27  264.06 383.026   1
  -1   7  27  -58.13 162.598   1
   1  -7 -26 4164.47 593.315   1
  -1   7  26 4739.01 352.647  -1
  -1   7  26 4573.78 597.070   1
   1  -7 -25   55.99 391.288   1
  -1   7  25  -30.76 145.024   1
  -1   7  25  -69.96 359.181   1
   1  -7 -24 2348.10 472.399   1
  -1   7  24 1750.66 246.864   1
  -1   7  24 2355.61 496.432   1
   1  -7 -23 1783.70 622.981   1
  -1   7  23 1353.36 461.885   1
   1  -7 -22  35753. 1647.01  -1
  -1   7  22  35588. 1351.86   1
   1  -7 -21 4153.21 570.409   1
  -1   7  21 4416.07 351.896   1
   1  -7 -20 8088.61 730.003   1
  -1   7  20 5764.17 405.557   1
   1  -7 -19  450.62 503.191   1
   1  -7 -19  553.89 339.654   1
  -1   7  19   97.15 175.779   1
   1  -7 -18  14844. 1036.42   1
   1  -7 -18  12471. 862.185   1
  -1   7  18  14048. 687.945   1
  -1   7  18  14731. 958.692   1
   1  -7 -17 -207.59 381.149   1
  -1   7  17  193.32 339.992   1
   1  -7 -16  51295. 2195.64   1
   1  -7 -16  54750. 2188.88   1
  -1   7  16  58843. 2089.00   1
  -1   7  16  59895. 2352.98   1
   1  -7 -15 8261.35 760.420   1
   1  -7 -15 6571.53 606.834   1
  -1   7  15 7254.97 464.889   1
  -1   7  15 7360.11 680.810   1
   1  -7 -14 3533.98 558.017   1
   1  -7 -14 2704.47 433.721   1
  -1   7  14 2265.11 285.918   1
  -1   7  14 3245.96 512.955   1
   1  -7 -13 1776.19 453.999   1
   1  -7 -13 2752.16 439.729   1
  -1   7  13 2647.01 453.999   1
  -1   7  13 2404.80 282.313   1
   1  -7 -12  27920. 1304.92   1
  -1   7  12  29219. 1162.22   1
   1  -7 -11 5174.61 538.114   1
   1  -7 -11 5587.68 633.495   1
  -1   7  11 5512.57 573.788   1
  -1   7  11 4881.71 384.528   1
   1  -7 -10  68156. 2652.64   1
   1  -7 -10  65340. 2454.75   1
  -1   7  10  71611. 2672.92   1
  -1   7  10  71874. 2483.29   1
   1  -7  -9 1037.18 407.435   1
  -1   7   9  481.79 324.972   1
   1  -7  -8 6781.82 564.776   1
   1  -7  -8 5745.39 598.948   1
  -1  -7   8 6466.38 281.524   1
   1   7  -8 7198.64 303.830   1
  -1   7   8 6165.97 559.894   1
  -1   7   8 6841.90 444.986   1
   1  -7  -7 2685.69 401.802   1
   1  -7  -7 3860.30 526.849   1
  -1  -7   7 2735.63 230.079   1
  -1  -7   7 2971.46 236.688   1
   1   7  -7 2608.71 229.440   1
   1   7  -7 2523.47 162.749  -1
  -1   7   7 2885.09 416.072   1
  -1   7   7 2539.24 282.764   1
   1  -7  -6  38828. 1576.04   1
   1  -7  -6  38565. 1654.52   1
  -1  -7   6  38190. 1323.32   1
   1   7  -6  41307. 1369.88   1
  -1   7   6  39842. 1621.10   1
  -1   7   6  41419. 1514.46   1
  -1  -7   5   38.72 208.674   1
  -1  -7   5   77.28 179.008   1
   1   7  -5  117.27 184.604  -1
   1   7  -5   69.85 121.179   1
  -1   7   5   91.18 255.464   1
  -1   7   5   13.00 155.614   1
   1  -7  -4  55764. 2153.96   1
   1  -7  -4  55051. 2043.93   1
  -1  -7   4  54863. 1895.98   1
  -1  -7   4  57266. 2000.00   1
   1   7  -4  58318. 2018.77   1
   1   7  -4  61359. 2027.79   1
  -1   7   4  61322. 2113.03   1
  -1   7   4  60233. 2230.19   1
   1  -7  -3  975.59 299.925  -1
  -1  -7   3  960.95 242.658   1
  -1  -7   3  787.08 256.778   1
   1   7  -3 1187.76 173.826   1
   1   7  -3 1275.63 251.070   1
  -1   7   3 1384.90 221.066   1
   1  -7  -2 2403.68 411.190  -1
   1  -7  -2 2707.85 361.321   1
  -1  -7   2 2955.31 352.309   1
  -1  -7   2 2405.56 302.553   1
   1   7  -2 3267.74 339.804   1
   1   7  -2 3011.26 250.244   1
  -1   7   2 2804.73 375.328   1
  -1   7   2 3192.64 282.013   1
   1  -7  -1 7089.74 563.649   1
  -1  -7   1 7101.01 516.334   1
   1   7  -1 4971.83 328.426   1
   1   7  -1 5148.32 421.704   1
  -1   7   1 5245.96 450.995   1
  -1   7   1 5212.16 342.320   1
   1  -7   0  88547. 3010.89   1
   1  -7   0  84378. 2967.70   1
  -1  -7   0  86782. 2994.74   1
  -1  -7   0  90424. 3126.17   1
   1   7   0  97822. 3322.19   1
  -1   7   0  98535. 3225.68   1
  -1   7   0  96733. 3298.91   1
   1  -7   1 1249.72 332.707   1
  -1  -7  -1 1452.50 329.403   1
  -1  -7  -1 1143.82 289.335  -1
   1   7   1 1296.66 300.863   1
   1   7   1 1381.52 209.050   1
  -1   7  -1 1878.71 310.289   1
   1  -7   2  46376. 1668.42   1
   1  -7   2  49981. 1876.45   1
  -1  -7  -2  47052. 1812.99   1
  -1  -7  -2  46226. 1766.80   1
   1   7   2  48780. 1839.28   1
   1   7   2  51971. 1814.87   1
  -1   7  -2  51220. 1742.77   1
  -1   7  -2  48704. 1778.82   1
   1  -7   3 1822.75 280.510   1
   1  -7   3 1594.82 311.828   1
  -1  -7  -3 1695.83 335.786   1
   1   7   3 2638.38 275.291   1
  -1   7  -3 1886.22 296.207   1
  -1   7  -3 2235.45 211.566   1
   1  -7   4 2918.89 297.296  -1
   1  -7   4 3462.26 379.647   1
  -1  -7  -4 2996.99 388.284   1
  -1  -7  -4 3486.29 467.142   1
   1   7   4 3376.26 303.755   1
   1   7   4 3253.47 410.063   1
  -1   7  -4 3727.00 249.681  -1
  -1   7  -4 2920.01 317.273   1
   1   7   5 1908.75 244.048   1
   1   7   5 2567.40 389.786   1
  -1   7  -5 2513.33 196.883   1
  -1   7  -5 2436.35 286.819   1
   1  -7   6  88434. 2966.95   1
   1  -7   6  91889. 2983.85   1
  -1  -7  -6  91701. 3242.96   1
  -1  -7  -6  89410. 3204.65   1
   1   7   6  98122. 3419.07   1
   1   7   6  98573. 3282.76   1
  -1   7  -6 102629. 3259.85   1
  -1   7  -6  96508. 3174.99   1
   1  -7   7  817.50 218.738   1
  -1  -7  -7  820.50 374.802   1
  -1  -7  -7  501.69 300.300   1
   1   7   7  747.65 196.770   1
   1   7   7  568.91 307.698   1
  -1   7  -7  799.47 134.735   1
   1  -7   8  45926. 1600.82  -1
   1  -7   8  42095. 1399.17   1
  -1  -7  -8  42959. 1790.46   1
  -1  -7  -8  44536. 1803.23   1
   1   7   8  48517. 1755.54   1
   1   7   8  47052. 1861.81   1
  -1   7  -8  47803. 1618.10   1
  -1   7  -8  46714. 1510.70   1
   1  -7   9 5373.63 305.595   1
  -1  -7  -9 5531.35 582.050   1
  -1   7  -9 4791.58 266.992   1
  -1  -7 -10  16493. 930.153   1
  -1  -7 -10  16091. 963.574   1
   1   7  10  17240. 952.309   1
   1   7  10  17161. 778.445   1
  -1  -7 -11 3689.44 542.245   1
  -1  -7 -11 3567.78 490.799   1
   1   7  11 2310.93 278.558   1
   1   7  11 3135.56 475.403   1
  -1  -7 -12  63274. 2432.59   1
   1   7  12  69132. 2396.92   1
  -1  -7 -13  685.32 384.153   1
  -1  -7 -13  117.42 294.067   1
   1   7  13  120.88 179.609   1
   1   7  13 -373.11 328.802   1
  -1  -7 -14  11235. 784.453   1
  -1  -7 -14  11930. 871.573   1
   1   7  14  11112. 588.058   1
   1   7  14  13068. 857.303   1
  -1  -7 -15 6954.56 704.844   1
  -1  -7 -15 6834.39 631.618   1
   1   7  15 5756.66 412.317   1
   1   7  15 5981.97 607.960   1
  -1  -7 -16  12400. 918.888   1
  -1  -7 -16  13053. 876.079   1
   1   7  16  15242. 725.497   1
   1   7  16  14630. 900.863   1
  -1  -7 -17 1287.64 460.758   1
  -1  -7 -17 2561.39 490.048   1
   1   7  17 2825.01 302.666   1
   1   7  17 3131.05 497.183   1
  -1  -7 -18  34401. 1580.55   1
  -1  -7 -18  34405. 1667.29   1
   1   7  18  33567. 1564.40   1
   1   7  18  32625. 1260.98   1
  -1  -7 -19 -224.11 319.527   1
   1   7  19  -49.34 153.924   1
  -1  -7 -20 1906.49 492.677   1
   1   7  20 2271.12 265.715   1
  -1  -7 -21 -233.23 319.076   1
   1   7  21  105.18 158.580   1
  -1  -7 -22  12077. 893.728   1
   1   7  22  10886. 570.409   1
  -1  -7 -23  117.72 347.052   1
   1   7  23  187.83 176.117   1
  -1  -7 -24  14979. 1010.89   1
   1   7  24  14247. 666.541   1
  -1  -7 -25  318.66 419.451   1
   1   7  25  295.42 381.524   1
   1   7  25  280.51 159.482   1
  -1  -7 -26  883.59 410.814   1
   1   7  26  333.12 396.169   1
   1   7  26  455.13 169.095   1
  -1  -7 -27  540.74 420.578   1
   1   7  27   24.72 154.450   1
   1   7  27  689.07 410.063   1
  -1  -7 -28 9339.08 829.515   1
   1   7  28  10526. 555.764   1
   1   7  29  244.76 182.764   1
   1  -8 -28 1537.36 556.515   1
  -1   8  28 1063.84 258.918   1
   1  -8 -27 2052.95 481.411   1
  -1   8  27 1588.06 259.219   1
   1  -8 -26 4551.25 602.703   1
  -1   8  26 5689.07 399.549   1
   1  -8 -25  702.59 395.043   1
  -1   8  25  994.74 226.962   1
   1  -8 -24 9346.59 812.241   1
  -1   8  24  10300. 545.249   1
   1  -8 -23 2969.20 523.469   1
  -1   8  23 2161.47 258.242   1
   1  -8 -22 1142.32 438.227   1
  -1   8  22  211.94 173.376   1
   1  -8 -21  10484. 1001.50   1
  -1   8  21  12614. 913.255   1
   1  -8 -20  12227. 1067.97   1
   1  -8 -20  14382. 947.427   1
  -1   8  20  14596. 969.582   1
  -1   8  20  15573. 732.256   1
   1  -8 -19 4100.63 554.637   1
   1  -8 -19 3241.08 654.900   1
  -1   8  19 4446.11 579.421   1
  -1   8  19 3728.12 329.065   1
   1  -8 -18  15881. 1177.62   1
   1  -8 -18  17161. 1018.40   1
  -1   8  18  18235. 817.498   1
  -1   8  18  19305. 1120.92   1
   1  -8 -17  12024. 847.915   1
  -1   8  17  11273. 597.821   1
   1  -8 -16 1030.04 403.304   1
   1  -8 -16  476.91 495.306   1
  -1   8  16 1262.86 421.329   1
  -1   8  16  939.54 225.835   1
   1  -8 -15 7318.81 775.065   1
  -1   8  15 8358.99 724.746   1
   1  -8 -14  27225. 1438.23   1
   1  -8 -14  29703. 1411.94   1
  -1   8  14  34014. 1568.53   1
  -1   8  14  34356. 1335.71   1
   1  -8 -13  10150. 856.176   1
   1  -8 -13 8869.69 708.599   1
  -1   8  13 8546.74 743.146   1
  -1   8  13 9992.48 572.286   1
   1  -8 -12  16617. 1083.74   1
   1  -8 -12  16012. 935.786   1
  -1   8  12  17563. 799.849   1
  -1   8  12  20173. 1114.53   1
   1  -8 -11 5234.69 557.266   1
   1  -8 -11 6218.54 695.456  -1
  -1   8  11 5238.45 574.164   1
  -1   8  11 5347.35 399.549   1
   1  -8 -10 5550.13 560.645   1
  -1   8  10 6488.92 437.476   1
  -1   8   9 4611.34 527.600   1
  -1   8   9 4727.75 378.145   1
   1  -8  -8  33136. 1459.63   1
   1  -8  -8  33139. 1594.82   1
  -1  -8   8  33391. 1140.82  -1
  -1  -8   8  32880. 1119.41  -1
   1   8  -8  38979. 1309.05   1
   1   8  -8  38415. 1243.33   1
  -1   8   8  38716. 1646.26   1
  -1   8   8  38152. 1436.72   1
   1  -8  -7 4359.74 613.593   1
  -1  -8   7 4389.78 313.856   1
   1   8  -7 4821.62 245.625   1
  -1   8   7 4971.83 534.359   1
   1  -8  -6  19793. 1002.25   1
   1  -8  -6  20015. 1125.80   1
  -1  -8   6  19271. 784.453   1
  -1  -8   6  17935. 768.306   1
   1   8  -6  21003. 760.044   1
   1   8  -6  19148. 800.225   1
  -1   8   6  20766. 886.969   1
  -1   8   6  20304. 1041.31   1
   1  -8  -5  11307. 823.131   1
   1  -8  -5 9748.39 672.925   1
  -1  -8   5  10837. 596.319   1
  -1  -8   5 9996.24 535.110   1
   1   8  -5  10447. 462.636   1
   1   8  -5 9737.13 539.616   1
  -1   8   5  10638. 561.396   1
  -1   8   5  10650. 716.484   1
   1  -8  -4  10199. 678.933   1
   1  -8  -4 9410.43 740.517   1
  -1  -8   4  10165. 562.523   1
  -1  -8   4 9545.62 573.037   1
   1   8  -4  11866. 522.718   1
   1   8  -4  11183. 600.075   1
  -1   8   4  11566. 581.674  -1
  -1   8   4  10834. 714.982   1
   1  -8  -3 8156.21 597.446   1
   1  -8  -3 8711.97 727.374   1
  -1  -8   3 7780.69 511.453   1
  -1  -8   3 7562.89 536.988  -1
   1   8  -3 9049.93 447.991   1
   1   8  -3 8490.42 535.861   1
  -1   8   3 9305.29 506.947   1
  -1   8   3 8775.81 647.390   1
   1  -8  -2  40293. 1719.11   1
   1  -8  -2  41081. 1618.10   1
  -1  -8   2  38040. 1502.06   1
   1   8  -2  46226. 1733.38   1
  -1   8   2  47353. 1679.68   1
  -1   8   2  49080. 1906.87   1
   1  -8  -1  639.88 289.185   1
  -1  -8   1  811.87 276.230   1
  -1  -8   1  601.95 330.679   1
   1   8  -1  971.08 298.047   1
   1   8  -1  829.89 188.134   1
  -1   8   1 1071.72 209.313   1
   1  -8   0 5888.09 486.669   1
   1  -8   0 4449.86 534.735   1
  -1  -8   0 5159.59 479.158   1
  -1  -8   0 4494.93 504.318   1
   1   8   0 5264.73 488.922   1
   1   8   0 6710.47 399.924   1
  -1   8   0 5846.78 524.220  -1
  -1   8   0 6248.59 383.026   1
   1  -8   1  26977. 1129.93   1
   1  -8   1  29339. 1330.08   1
  -1  -8  -1  26906. 1185.88   1
   1   8   1  30680. 1161.47   1
  -1   8  -1  29914. 1268.87   1
  -1   8  -1  30897. 1141.19   1
   1  -8   2 2870.07 359.857  -1
   1  -8   2 2349.23 432.970   1
  -1  -8  -2 2111.90 438.227   1
  -1  -8  -2 2449.12 393.165   1
   1   8   2 3815.24 318.550   1
   1   8   2 3475.02 431.468   1
  -1   8  -2 3096.13 262.561   1
  -1   8  -2 3153.96 387.157  -1
   1  -8   3  11382. 715.733   1
  -1  -8  -3  10552. 740.142   1
  -1  -8  -3 9992.48 661.284   1
   1   8   3  10263. 539.241   1
   1   8   3  10912. 703.341   1
  -1   8  -3 9876.07 598.572   1
   1  -8   4  56177. 1969.58   1
   1  -8   4  52873. 1986.48   1
  -1  -8  -4  57229. 2181.37   1
  -1  -8  -4  55051. 2166.73   1
   1   8   4  66992. 2308.67   1
   1   8   4  62711. 2345.47   1
  -1   8  -4  60834. 2165.98   1
  -1   8  -4  63049. 2089.00   1
   1  -8   5  13699. 646.263   1
   1  -8   5  14634. 784.077   1
  -1  -8  -5  14878. 853.923   1
  -1  -8  -5  14664. 911.002   1
   1   8   5  16042. 734.885   1
   1   8   5  13909. 816.372   1
  -1   8  -5  15036. 732.632   1
  -1   8  -5  15415. 604.581   1
   1  -8   6 2036.05 351.258   1
   1  -8   6 3082.99 329.027   1
  -1  -8  -6 3013.14 447.240  -1
  -1  -8  -6 2777.69 505.069   1
   1   8   6 3183.62 317.386   1
   1   8   6 3244.83 450.244   1
  -1   8  -6 3143.07 332.144   1
  -1   8  -6 3648.14 235.486   1
   1  -8   7  36237. 1279.38   1
   1  -8   7  37702. 1414.94   1
  -1  -8  -7  39054. 1717.61   1
  -1  -8  -7  37852. 1690.20   1
   1   8   7  41908. 1585.43   1
   1   8   7  38565. 1634.62   1
  -1   8  -7  38979. 1296.28   1
  -1   8  -7  37739. 1373.26   1
   1  -8   8  15130. 619.226   1
  -1  -8  -8  17120. 962.447   1
  -1  -8  -8  15362. 984.603   1
   1   8   8  18960. 838.903   1
   1   8   8  17721. 964.701   1
  -1   8  -8  19564. 697.333   1
   1  -8   9 -182.09 186.857   1
   1  -8   9  -96.88 172.587   1
   1   8   9  105.11 322.380  -1
   1   8   9  390.91 189.974   1
  -1   8  -9  289.71 165.039   1
  -1   8  -9   74.69 143.710  -1
  -1  -8 -10  30315. 1503.57   1
  -1  -8 -10  30762. 1417.57   1
   1   8  10  33954. 1303.79   1
   1   8  10  33616. 1523.84   1
  -1  -8 -11 7814.49 673.676   1
  -1  -8 -11 7585.42 730.754   1
   1   8  11 8392.78 497.183   1
   1   8  11 7690.57 656.402   1
  -1  -8 -12  329.82 397.296   1
  -1  -8 -12  107.66 296.320   1
   1   8  12   -2.12 179.459   1
   1   8  12   77.43 320.991   1
  -1  -8 -13  12572. 930.153  -1
  -1  -8 -13  11570. 808.110   1
  -1  -8 -14  22369. 1268.49   1
  -1  -8 -14  25430. 1374.39   1
   1   8  14  24671. 1250.84   1
   1   8  14  25933. 1099.14   1
  -1  -8 -15 2673.30 542.245   1
  -1  -8 -15 2480.28 481.787   1
   1   8  15 2633.49 475.028   1
   1   8  15 2499.81 296.207   1
  -1  -8 -16  10135. 791.963   1
  -1  -8 -16  11265. 905.369   1
   1   8  16  11923. 856.176   1
   1   8  16  11389. 597.446   1
  -1  -8 -17 8914.75 840.029   1
  -1  -8 -17 8775.81 735.260   1
   1   8  17  10698. 574.164   1
   1   8  17 8411.56 775.816   1
  -1  -8 -18 -404.06 435.599   1
  -1  -8 -18  204.69 329.328  -1
   1   8  18  521.22 392.790  -1
   1   8  18  267.10 190.725   1
  -1  -8 -19 4461.13 653.398   1
  -1  -8 -19 4889.22 601.201   1
  -1  -8 -20  16200. 1061.58   1
  -1  -8 -20  14900. 1099.89   1
   1   8  20  18550. 839.654   1
   1   8  20  20053. 1126.92   1
  -1  -8 -21 1396.17 547.127   1
  -1  -8 -21 1615.85 458.505   1
   1   8  21 1722.49 241.870   1
  -1  -8 -22 3626.73 565.527   1
   1   8  22 4814.11 359.594   1
  -1  -8 -23 2443.48 526.098   1
   1   8  23 2370.26 265.978   1
  -1  -8 -24 1418.32 464.889   1
   1   8  24  931.28 200.188  -1
  -1  -8 -25 1110.03 485.918   1
   1   8  25 1244.08 226.737   1
  -1  -8 -26 8772.05 783.326  -1
   1   8  26 8715.73 506.196   1
  -1  -8 -27  -16.26 388.659   1
   1   8  27  625.23 210.815   1
   1  -9 -26 1357.11 497.934   1
  -1   9  26 1481.41 285.617   1
   1  -9 -25 6304.91 663.161   1
  -1   9  25 8452.87 514.081   1
   1  -9 -24  553.89 370.409   1
  -1   9  24  937.66 231.355   1
   1  -9 -23 6537.73 889.222   1
   1  -9 -22  775.06 562.523   1
   1  -9 -22 1478.41 449.117   1
  -1   9  22 1994.74 273.000   1
   1  -9 -21 3131.80 524.220   1
   1  -9 -21 2447.61 688.696   1
  -1   9  21 3127.30 303.567   1
   1  -9 -20  582.05 377.394   1
   1  -9 -20  374.50 575.290   1
  -1   9  20  330.83 195.569   1
   1  -9 -19  20931. 1187.76   1
   1  -9 -19  23222. 1475.40   1
   1  -9 -18 1343.22 576.042   1
   1  -9 -18  996.62 424.333   1
  -1   9  18 1932.03 266.016   1
  -1   9  18 1390.16 473.901   1
   1  -9 -17  419.45 527.975   1
   1  -9 -17 1027.04 407.059   1
   1  -9 -16 4923.01 748.028   1
   1  -9 -16 5396.16 600.450   1
  -1   9  16 5692.82 408.186   1
  -1   9  16 5606.45 649.643   1
   1  -9 -15  15494. 955.313   1
  -1   9  15  17353. 794.216   1
   1  -9 -14  865.56 411.941   1
   1  -9 -14 1088.25 511.828  -1
  -1   9  14 2354.49 514.832   1
  -1   9  14 1290.27 242.245   1
   1  -9 -13  16744. 1220.80   1
   1  -9 -13  19808. 1120.54   1
  -1   9  13  23008. 976.717   1
  -1   9  13  22110. 1212.17   1
   1  -9 -12 2647.39 511.077   1
   1  -9 -12 2013.52 567.029   1
  -1   9  12 3237.70 511.077   1
  -1   9  12 2576.04 329.778   1
   1  -9 -11  801.35 482.538   1
   1  -9 -11  614.72 365.039   1
  -1   9  11 1020.65 400.300   1
  -1   9  11  739.02 213.669   1
   1  -9 -10  13823. 867.442   1
   1  -9 -10  14044. 1029.66   1
  -1   9  10  17495. 793.841   1
  -1   9  10  17161. 1001.50   1
   1  -9  -9  11220. 773.563   1
   1  -9  -9  11419. 927.524   1
  -1   9   9  10785. 790.461   1
  -1   9   9  11570. 600.075   1
   1  -9  -8  353.06 454.750   1
   1  -9  -8  286.78 315.509   1
  -1  -9   8  438.98 200.563   1
  -1  -9   8  505.82 244.461   1
   1   9  -8  241.19 211.115   1
   1   9  -8  347.46 115.809   1
  -1   9   8  404.43 196.658   1
  -1   9   8  244.57 352.196   1
   1  -9  -7  13368. 832.143   1
  -1  -9   7  12824. 629.365   1
  -1  -9   7  12336. 585.805   1
   1   9  -7  13485. 523.469   1
   1   9  -7  13421. 625.234   1
  -1   9   7  14011. 915.883  -1
  -1   9   7  15205. 721.366   1
   1  -9  -6 4472.40 633.871   1
   1  -9  -6 5129.55 546.751   1
  -1  -9   6 5095.75 407.435   1
  -1  -9   6 4123.17 395.794   1
   1   9  -6 5760.42 423.958   1
   1   9  -6 6289.89 331.243   1
  -1   9   6 6128.42 621.103   1
  -1   9   6 6075.85 424.709   1
   1  -9  -5 -129.85 425.460   1
   1  -9  -5 -106.53 334.585   1
  -1  -9   5 -252.57 263.537   1
  -1  -9   5  142.10 288.734   1
   1   9  -5  254.83 158.017   1
   1   9  -5  -43.33 260.495   1
  -1   9   5  -92.15 199.624   1
  -1   9   5  118.70 324.220   1
   1  -9  -4  13132. 940.292   1
  -1  -9   4  11540. 697.333   1
   1   9  -4  13819. 735.636  -1
  -1   9   4  14146. 877.205   1
   1  -9  -3 8073.59 763.799   1
   1  -9  -3 8062.33 624.859   1
  -1  -9   3 8246.33 617.724   1
  -1  -9   3 6977.09 517.086   1
   1   9  -3 9485.53 476.154   1
   1   9  -3 8726.99 594.817   1
  -1   9   3 9703.33 712.354   1
  -1   9   3 9203.90 515.583   1
   1  -9  -2  -87.38 417.574   1
   1  -9  -2    8.54 293.991   1
  -1  -9   2  573.41 347.465   1
  -1  -9   2  -80.06 292.527   1
   1   9  -2   35.71 155.914   1
  -1   9   2  147.92 178.370   1
  -1   9   2  350.43 322.418   1
   1  -9  -1  45400. 1936.16   1
   1  -9  -1  41908. 1677.81   1
  -1  -9   1  43109. 1690.20   1
   1   9  -1  46264. 1637.25  -1
  -1   9   1  46226. 1846.04   1
  -1   9   1  44987. 1606.08   1
   1  -9   0 9887.33 648.892   1
   1  -9   0 9725.86 785.955   1
  -1  -9   0 9928.64 722.493   1
  -1  -9   0 9710.84 650.769   1
   1   9   0  13147. 616.222   1
   1   9   0  12903. 776.567   1
  -1   9   0  12095. 574.915   1
  -1   9   0  12839. 788.208   1
   1  -9   1  585.80 425.460   1
   1  -9   1  544.12 309.388   1
  -1  -9  -1  294.52 376.643   1
  -1  -9  -1 -113.26 322.155  -1
   1   9   1  240.18 332.595   1
   1   9   1  544.87 200.150   1
  -1   9  -1  513.71 181.600   1
   1  -9   2  11284. 784.077   1
   1  -9   2  12861. 729.252   1
  -1  -9  -2  12805. 784.453   1
  -1  -9  -2  12264. 828.764   1
   1   9   2  14656. 848.291   1
   1   9   2  15978. 720.240   1
  -1   9  -2  15809. 859.932   1
  -1   9  -2  16504. 695.456   1
   1  -9   3  25603. 1215.55   1
   1  -9   3  27375. 1147.95   1
  -1  -9  -3  27480. 1345.85   1
  -1  -9  -3  25092. 1195.27   1
   1   9   3  30496. 1183.25   1
   1   9   3  29264. 1322.57   1
  -1   9  -3  28284. 1049.57   1
  -1   9  -3  29350. 1265.49   1
   1  -9   4 3548.63 442.358   1
   1  -9   4 3403.30 483.289   1
  -1  -9  -4 3578.67 542.996   1
   1   9   4 4581.29 521.592   1
  -1   9  -4 4025.53 434.848   1
   1  -9   5  27623. 1228.31   1
   1  -9   5  28404. 1123.17   1
  -1  -9  -5  28772. 1344.35   1
  -1  -9  -5  30954. 1479.16   1
   1   9   5  30890. 1399.55   1
   1   9   5  31359. 1219.30   1
  -1   9  -5  31986. 1128.05   1
  -1   9  -5  31292. 1275.25   1
   1  -9   6 6365.00 473.901  -1
   1  -9   6 4806.60 506.947  -1
  -1  -9  -6 5790.46 655.651   1
  -1  -9  -6 7044.68 647.014  -1
   1   9   6 7900.86 676.304   1
   1   9   6 8768.30 516.710   1
  -1   9  -6 7401.42 503.942   1
  -1   9  -6 8576.78 400.676   1
   1  -9   7 2391.29 395.043   1
   1  -9   7 2592.19 348.779   1
  -1  -9  -7 3080.73 476.905   1
   1   9   7 3438.60 331.956   1
  -1   9  -7 3583.55 238.866   1
  -1   9  -7 3290.65 354.975   1
   1  -9   8 2403.68 324.934   1
   1  -9   8 1975.21 339.354   1
  -1  -9  -8 2600.45 465.640   1
  -1  -9  -8 1673.30 508.824  -1
   1   9   8 2636.50 464.138   1
   1   9   8 3113.40 316.485   1
  -1   9  -8 2989.86 321.404   1
  -1   9  -8 3124.67 226.323   1
   1  -9   9  44799. 1562.90   1
   1  -9   9  40931. 1383.03   1
  -1  -9  -9  42659. 1921.14   1
  -1  -9  -9  40143. 1716.48   1
   1   9   9  44912. 1871.57   1
   1   9   9  44086. 1623.36   1
  -1   9  -9  43335. 1490.80   1
  -1   9  -9  43860. 1446.11   1
  -1  -9 -10 4063.08 533.608   1
  -1  -9 -10 3826.51 631.618   1
   1   9  10 3580.92 518.963   1
   1   9  10 4720.24 374.765   1
  -1  -9 -11  10293. 776.943   1
  -1  -9 -11  11311. 909.875   1
   1   9  11  12114. 629.740   1
   1   9  11  11172. 800.600   1
  -1  -9 -12  10830. 900.112   1
   1   9  12  13567. 892.977   1
  -1  -9 -13 6304.91 625.234   1
  -1  -9 -13 6624.10 740.517   1
   1   9  13 7750.65 482.163   1
   1   9  13 6793.08 669.169   1
  -1  -9 -14  384.90 341.682   1
   1   9  14 1260.23 241.832   1
   1   9  14 1098.38 491.175   1
  -1  -9 -15  23136. 1345.85   1
  -1  -9 -15  21735. 1161.10   1
   1   9  15  24705. 1280.89   1
   1   9  15  24071. 1001.50  -1
  -1  -9 -16  751.78 491.175   1
  -1  -9 -16  625.23 378.145   1
   1   9  16 1187.76 431.843   1
   1   9  16  466.39 189.298   1
  -1  -9 -17 1840.78 570.033   1
  -1  -9 -17 1113.78 425.460   1
  -1  -9 -18 8655.64 865.940  -1
   1   9  18  10650. 834.396   1
  -1  -9 -19 4352.23 594.817   1
  -1  -9 -19 4472.40 728.125  -1
   1   9  19 4040.55 347.803   1
  -1  -9 -20  134.74 383.402   1
  -1  -9 -20  217.91 511.077   1
   1   9  20  -42.81 148.329   1
  -1  -9 -21 7269.99 874.577   1
  -1  -9 -21 8467.89 755.163   1
   1   9  21 8118.66 480.660   1
  -1  -9 -22 3198.27 544.498   1
  -1  -9 -22 1801.35 630.116   1
   1   9  22 2605.71 294.555   1
  -1  -9 -23 -179.46 509.951   1
  -1  -9 -23 -227.49 379.647   1
   1   9  23   12.74 169.545   1
  -1  -9 -24 3410.81 555.013   1
   1   9  24 4874.20 387.908   1
  -1  -9 -25  285.96 421.329   1
   1   9  25  806.23 239.429   1
   1 -10 -24  326.17 447.991   1
  -1  10  24  -66.77 203.980   1
   1 -10 -23 6481.41 677.055   1
  -1  10  23 8757.03 541.494   1
   1 -10 -22  104.36 355.989   1
  -1  10  22 -197.78 180.886   1
   1 -10 -21  12358. 1125.42   1
   1 -10 -20  569.28 386.406   1
   1 -10 -20  812.24 613.593   1
  -1  10  20  306.35 201.765   1
   1 -10 -19  399.55 393.165   1
   1 -10 -19  236.73 611.716   1
  -1  10  19  497.93 193.992   1
  -1  10  18  737.14 207.923   1
   1 -10 -17 9977.46 803.229   1
   1 -10 -17 9827.25 1022.15  -1
  -1  10  17  10338. 570.033  -1
   1 -10 -16 -204.77 559.894   1
  -1  10  16  614.34 434.848   1
   1 -10 -15 9662.03 775.440   1
   1 -10 -15 9887.33 996.995   1
  -1  10  15  12144. 627.487   1
  -1  10  15  11652. 889.597   1
   1 -10 -14 -457.00 336.537   1
   1 -10 -14 -278.45 498.310   1
  -1  10  14  363.54 193.654   1
  -1  10  14  381.15 378.896   1
   1 -10 -13 2919.26 496.057   1
   1 -10 -13 1870.82 609.087   1
  -1  10  13 3115.28 317.912   1
  -1  10  13 3402.17 544.123   1
   1 -10 -12  683.06 403.680   1
  -1  10  12 1250.84 248.329   1
   1 -10 -11  20991. 1342.47   1
   1 -10 -11  21123. 1144.57   1
  -1  10  11  23072. 1225.31   1
  -1  10  11  25099. 1046.94   1
   1 -10 -10  662.79 534.359   1
  -1  10  10   15.91 337.288   1
   1 -10  -9  12576. 876.454   1
   1 -10  -9  10980. 974.088   1
  -1  10   9  12415. 870.822   1
  -1  10   9  13462. 675.553   1
   1 -10  -8  871.20 400.676   1
   1 -10  -8  285.35 472.399   1
  -1 -10   8  713.86 310.552   1
   1  10  -8  834.77 153.548   1
  -1  10   8 1893.73 465.640   1
  -1  10   8  878.33 239.241   1
   1 -10  -7 3350.35 651.896   1
   1 -10  -7 4145.70 568.531   1
  -1 -10   7 3161.84 390.537   1
  -1 -10   7 4085.61 408.186   1
   1  10  -7 4010.51 257.904   1
   1  10  -7 4111.90 416.823   1
  -1  10   7 4096.88 373.263   1
  -1  10   7 4014.27 562.147   1
   1 -10  -6  520.84 479.534   1
   1 -10  -6 -542.25 336.425   1
  -1 -10   6   82.69 322.005   1
  -1 -10   6  278.33 330.905   1
   1  10  -6   67.93 166.391   1
   1  10  -6  212.47 311.753   1
  -1  10   6  263.20 196.094   1
  -1  10   6  553.14 392.039   1
   1 -10  -5  34773. 1547.50   1
  -1 -10   5  33793. 1404.81   1
   1  10  -5  36737. 1473.15   1
  -1  10   5  40518. 1513.33   1
   1 -10  -4  938.04 386.030  -1
   1 -10  -4 1044.31 518.588   1
  -1 -10   4  812.62 394.667   1
  -1 -10   4  734.88 351.971   1
   1  10  -4 1047.31 215.020   1
   1  10  -4  468.64 347.202   1
  -1  10   4 1140.44 237.138   1
  -1  10   4  984.98 416.447   1
   1 -10  -3 6530.22 751.032  -1
   1 -10  -3 5606.45 573.413   1
  -1 -10   3 5685.31 515.959   1
   1  10  -3 7037.17 419.076   1
  -1  10   3 7029.66 651.145   1
  -1  10   3 7423.95 464.138   1
   1 -10  -2  317.76 454.750   1
  -1 -10   2  332.52 394.667   1
  -1 -10   2  417.57 338.866   1
   1  10  -2  812.24 210.477  -1
   1  10  -2  708.22 375.516   1
  -1  10   2  487.42 387.532   1
   1 -10  -1 5242.20 532.482   1
   1 -10  -1 4506.19 644.761   1
  -1 -10   1 4911.75 518.963   1
  -1 -10   1 5452.49 649.267   1
  -1  10   1 8584.30 494.179   1
  -1  10   1 9459.25 726.248   1
   1 -10   0  222.94 449.493   1
   1 -10   0  375.48 335.599   1
  -1 -10   0  561.40 357.341   1
  -1 -10   0  766.05 452.121   1
   1  10   0  243.48 331.205   1
   1  10   0  420.58 202.441   1
  -1  10   0  272.62 184.679   1
  -1  10   0  536.61 373.526   1
   1 -10   1  29136. 1460.01   1
   1 -10   1  29996. 1327.82   1
  -1 -10  -1  29042. 1411.94  -1
  -1 -10  -1  31956. 1418.32   1
   1  10   1  37026. 1387.91   1
   1  10   1  32906. 1459.26   1
  -1  10  -1  35708. 1318.06   1
  -1  10  -1  33826. 1488.17   1
   1 -10   2 -322.31 441.607   1
   1 -10   2 -188.73 328.501   1
  -1 -10  -2  164.55 452.872   1
   1  10   2  135.52 353.661   1
  -1  10  -2  232.52 339.654   1
  -1  10  -2  217.31 183.327   1
   1 -10   3 4310.92 477.656   1
  -1 -10  -3 4273.37 543.747   1
  -1 -10  -3 4517.46 614.720   1
   1  10   3 4769.05 561.021   1
   1  10   3 4832.89 380.022   1
  -1  10  -3 5369.88 359.819   1
   1 -10   4  325.31 439.729   1
  -1 -10  -4  138.19 454.750   1
  -1 -10  -4  364.78 342.846   1
   1  10   4 -322.19 358.693   1
   1  10   4  -54.30 176.267   1
  -1  10  -4 -197.56 333.120   1
  -1  10  -4  -70.33 178.821   1
   1 -10   5  14878. 775.816   1
   1 -10   5  15280. 928.651   1
  -1 -10  -5  15614. 936.161   1
   1  10   5  17518. 793.465   1
  -1  10  -5  17187. 897.859   1
  -1  10  -5  16526. 682.313   1
   1 -10   6  550.88 393.541   1
   1 -10   6  719.86 398.047   1
  -1 -10  -6 1177.62 538.114   1
  -1 -10  -6  862.94 383.026   1
   1  10   6 1567.03 437.852   1
   1  10   6 1292.53 248.779   1
  -1  10  -6 1030.79 201.915   1
  -1  10  -6  771.69 346.414   1
   1 -10   7  31446. 1233.95   1
   1 -10   7  30691. 1306.80   1
  -1 -10  -7  29609. 1414.57   1
  -1 -10  -7  31224. 1585.43   1
   1  10   7  33680. 1550.51   1
   1  10   7  35997. 1376.27   1
  -1  10  -7  36279. 1245.59   1
  -1  10  -7  35073. 1372.89   1
   1 -10   8  328.09 352.835   1
   1 -10   8   77.24 341.644   1
  -1 -10  -8  412.69 469.771   1
  -1 -10  -8  524.97 371.198   1
   1  10   8   75.18 186.369   1
   1  10   8 -106.57 360.420  -1
  -1  10  -8  137.40 170.484   1
  -1  10  -8    8.25 273.413  -1
   1 -10   9  254.11 257.078   1
   1 -10   9 -275.52 227.638   1
  -1 -10  -9  -94.40 365.077   1
  -1 -10  -9  262.79 496.057   1
   1  10   9   95.61 384.153   1
   1  10   9   91.03 192.752   1
  -1  10  -9  351.90 203.154   1
  -1  10  -9   46.15 228.351   1
  -1 -10 -10  121.29 363.462   1
  -1 -10 -10   61.70 467.142   1
   1  10  10  375.22 197.672   1
   1  10  10 1018.40 436.725   1
  -1 -10 -11  23094. 1362.00   1
  -1 -10 -11  22546. 1208.41   1
   1  10  11  26237. 1075.48   1
   1  10  11  26076. 1311.30   1
  -1 -10 -12  472.40 373.488   1
   1  10  12  216.00 187.420   1
  -1 -10 -13  19501. 1122.79  -1
  -1 -10 -13  17578. 1222.30   1
   1  10  13  21359. 918.137   1
   1  10  13  22561. 1229.06  -1
  -1 -10 -14  172.66 470.146   1
  -1 -10 -14 -142.92 350.094   1
   1  10  14   61.81 176.981   1
   1  10  14 -460.38 369.207   1
  -1 -10 -15  622.61 482.538   1
  -1 -10 -15  300.71 362.636   1
   1  10  15  187.61 184.716   1
   1  10  15  552.76 386.781   1
  -1 -10 -16  793.84 501.689   1
  -1 -10 -16  908.75 399.924   1
   1  10  16  953.81 414.945  -1
   1  10  16 1077.73 238.528   1
  -1 -10 -17 6841.90 717.236   1
  -1 -10 -17 6361.24 858.805   1
   1  10  17 8032.29 487.795   1
  -1 -10 -18 -269.77 502.440   1
  -1 -10 -18  302.74 390.912   1
   1  10  18   45.85 171.761   1
  -1 -10 -19 4536.23 784.453   1
  -1 -10 -19 5031.91 626.361   1
   1  10  19 6928.27 458.129   1
  -1 -10 -20  510.33 582.425   1
  -1 -10 -20  429.21 407.810   1
   1  10  20  754.79 223.207   1
  -1 -10 -21  772.81 365.565   1
  -1 -10 -21 1021.78 593.691   1
   1  10  21  734.13 225.347   1
  -1 -10 -22  606.08 380.398   1
  -1 -10 -23 3754.78 565.527   1
   1  10  23 5527.60 417.574   1
   1 -11 -21 1047.31 450.995   1
  -1  11  21 1160.72 264.776   1
   1 -11 -20   92.71 397.671   1
  -1  11  20  618.10 223.732   1
   1 -11 -19  14086. 957.190   1
   1 -11 -19  11510. 1122.42   1
  -1  11  19  19609. 889.597   1
   1 -11 -18  664.66 577.544   1
   1 -11 -18  736.01 467.517  -1
  -1  11  18  633.50 230.642   1
   1 -11 -17 1295.15 632.744   1
   1 -11 -17 1322.57 423.582   1
  -1  11  17 2196.77 296.883   1
   1 -11 -16 1190.39 416.823   1
   1 -11 -16 1730.38 696.958   1
  -1  11  16 2240.70 300.075   1
   1 -11 -15 6770.55 699.211   1
  -1  11  15  10800. 600.450   1
   1 -11 -14  200.30 374.277  -1
   1 -11 -14 -136.31 574.164   1
  -1  11  14    2.41 204.431   1
  -1  11  14  -83.93 423.582   1
   1 -11 -13  11412. 1121.67   1
   1 -11 -13  13124. 950.055   1
  -1  11  13  13808. 976.717   1
  -1  11  13  14837. 741.644   1
   1 -11 -12 2526.10 694.705   1
   1 -11 -12 1541.87 489.673   1
  -1  11  12 2421.70 526.849   1
  -1  11  12 1833.27 297.334   1
   1 -11 -11  399.17 410.063   1
   1 -11 -11  248.70 595.193   1
  -1  11  11  628.24 236.462   1
  -1  11  11 1027.79 436.350   1
   1 -11 -10 1249.34 680.435   1
   1 -11 -10 1960.19 488.546   1
  -1  11  10 1939.16 519.714  -1
  -1  11  10 2073.22 304.168   1
   1 -11  -9  11506. 1121.29   1
   1 -11  -9  11802. 876.454  -1
  -1  11   9  14499. 1004.13  -1
  -1  11   9  14976. 731.505   1
   1 -11  -8  347.35 387.157   1
   1 -11  -8  366.09 610.589   1
  -1 -11   8  524.60 373.826  -1
   1  11  -8  -12.16 158.768   1
  -1  11   8  -50.62 414.194   1
  -1  11   8   20.08 201.915   1
   1 -11  -7  11851. 1064.59   1
  -1 -11   7  13181. 739.391   1
  -1 -11   7  12674. 722.493   1
   1  11  -7  15291. 619.601   1
   1  11  -7  15404. 796.845   1
  -1  11   7  14330. 986.105   1
   1 -11  -6 1561.77 463.011   1
   1 -11  -6 2084.49 658.655   1
  -1 -11   6 1923.77 466.391   1
   1  11  -6 1987.98 448.366   1
  -1  11   6 2211.04 515.583   1
  -1  11   6 1962.82 282.125   1
   1 -11  -5  653.77 544.123   1
   1 -11  -5  601.20 388.659   1
  -1 -11   5  236.61 397.671   1
  -1 -11   5  380.77 411.190   1
   1  11  -5  119.83 199.136   1
   1  11  -5   51.15 388.284   1
  -1  11   5  169.66 196.845   1
  -1  11   5 -219.75 410.814   1
   1 -11  -4  605.33 404.431   1
   1 -11  -4  568.53 550.882   1
  -1 -11   4  706.72 426.962   1
   1  11  -4  271.08 209.012   1
  -1  11   4  150.17 405.933   1
  -1  11   4  462.64 210.251   1
   1 -11  -3 9755.90 987.982   1
   1 -11  -3  11115. 802.853   1
   1  11  -3  13676. 852.421   1
   1  11  -3  12839. 621.103   1
  -1  11   3  12343. 904.242   1
  -1  11   3  13481. 666.541   1
   1 -11  -2 1451.74 438.978   1
  -1 -11   2 1286.89 449.493   1
  -1 -11   2  968.46 484.791   1
   1  11  -2 1238.45 247.953   1
   1  11  -2 1069.84 426.586   1
  -1  11   2 1517.84 268.719   1
  -1  11   2  998.12 453.623   1
   1 -11  -1  10000. 973.337   1
   1 -11  -1 9936.15 784.077   1
  -1 -11   1  11844. 818.625   1
  -1 -11   1 9639.50 834.021   1
   1  11  -1  12257. 855.425   1
   1  11  -1  13376. 661.284   1
  -1  11   1  13849. 935.035   1
  -1  11   1  13466. 663.161   1
   1 -11   0 6492.67 814.494   1
  -1 -11   0 5730.37 706.721   1
   1  11   0 5287.27 623.357   1
  -1  11   0 5948.17 634.246   1
   1 -11   1 1537.36 570.784   1
   1 -11   1  984.60 446.488   1
  -1 -11  -1 1959.44 554.262   1
  -1 -11  -1  668.79 403.304   1
   1  11   1 1568.53 272.399   1
   1  11   1 1867.82 464.513   1
  -1  11  -1 1289.90 455.125   1
  -1  11  -1 1431.47 268.869   1
   1 -11   2 1213.67 458.505   1
   1 -11   2  461.88 577.919   1
  -1 -11  -2  750.28 410.814   1
  -1 -11  -2 1112.65 561.396   1
   1  11   2 1007.51 481.411   1
   1  11   2  662.41 235.111   1
  -1  11  -2 1029.29 243.147   1
  -1  11  -2 1348.85 441.982   1
  -1 -11  -3  19384. 1230.94   1
  -1 -11  -3  20244. 1125.80   1
   1  11   3  21239. 1175.74   1
   1  11   3  24912. 1033.04   1
  -1  11  -3  22632. 915.508   1
  -1  11  -3  24427. 1227.19   1
   1 -11   4 1152.83 446.864   1
   1 -11   4 1447.24 573.413   1
  -1 -11  -4 1401.80 450.619   1
  -1 -11  -4 1034.92 589.560   1
   1  11   4 1459.63 268.869   1
   1  11   4 1176.49 459.632   1
  -1  11  -4 1259.48 452.497   1
  -1  11  -4 1384.15 246.864   1
   1 -11   5  10113. 756.665   1
   1 -11   5 8475.40 820.878   1
  -1 -11  -5 8494.17 897.483  -1
  -1 -11  -5 8625.60 757.040   1
   1  11   5  12005. 874.952   1
   1  11   5  11344. 603.830   1
  -1  11  -5  11776. 555.013   1
  -1  11  -5  11453. 788.208   1
   1 -11   6 1949.30 553.135   1
   1 -11   6 2058.95 477.281   1
  -1 -11  -6 1915.51 493.052   1
  -1 -11  -6 1825.01 661.659   1
   1  11   6 1344.35 261.359   1
   1  11   6 1720.24 498.685   1
  -1  11  -6 1770.56 451.370   1
   1 -11   7 2935.41 580.548   1
   1 -11   7 2675.18 469.395   1
  -1 -11  -7 2191.14 639.504   1
   1  11   7 2866.69 539.616   1
  -1  11  -7 3262.11 474.652   1
  -1  11  -7 2842.66 275.441   1
   1 -11   8 1555.39 410.814   1
   1 -11   8 1261.36 424.333   1
  -1 -11  -8 1702.96 447.240   1
  -1 -11  -8  719.11 596.695   1
   1  11   8 1756.66 479.909   1
   1  11   8 1300.79 260.871   1
  -1  11  -8 1084.49 247.953   1
  -1  11  -8 1591.06 381.900   1
   1 -11   9  20300. 790.837   1
   1 -11   9  23759. 931.280   1
  -1 -11  -9  20815. 1171.61   1
   1  11   9  26602. 1099.14   1
  -1  11  -9  25820. 915.883   1
  -1  11  -9  27661. 998.497   1
  -1 -11 -10  482.16 390.161   1
  -1 -11 -10 -136.35 514.457   1
   1  11  10  544.50 418.325   1
   1  11  10  249.23 205.332   1
  -1 -11 -11 2663.53 519.714   1
  -1 -11 -11 1366.13 674.802   1
   1  11  11 3080.36 339.617   1
   1  11  11 3330.08 581.299   1
  -1 -11 -12  887.34 591.438   1
  -1 -11 -12 1087.87 447.615   1
   1  11  12 1059.33 451.370   1
   1  11  12 1286.14 255.426   1
  -1 -11 -13 3942.92 768.681   1
   1  11  13 3849.04 594.817   1
  -1 -11 -14 2357.11 713.480   1
  -1 -11 -14 1775.06 473.526   1
   1  11  14 1792.34 279.572   1
  -1 -11 -15 9192.63 1194.52   1
  -1 -11 -15  10443. 811.490   1
   1  11  15  16587. 781.449   1
  -1 -11 -16  360.80 608.336   1
  -1 -11 -16   -9.10 347.540   1
   1  11  16  447.62 201.765   1
  -1 -11 -17  672.17 556.890   1
  -1 -11 -17  831.02 368.644   1
   1  11  17  887.72 229.703   1
  -1 -11 -18  658.66 409.688   1
  -1 -11 -18  233.57 568.156  -1
  -1 -11 -19 2648.14 518.963   1
   1  11  19 2710.47 332.069   1
  -1 -11 -20  -42.81 381.149   1
   1  11  20  551.63 223.394   1
  -1 -11 -21 3585.43 560.270   1
   1  11  21 3001.87 350.131   1
   1 -12 -19  217.69 381.524   1
  -1  12  19    7.12 259.970   1
   1 -12 -18  327.53 360.721   1
  -1  12  18  188.85 247.315   1
   1 -12 -17 4051.82 598.197   1
  -1  12  17 6432.59 486.293   1
   1 -12 -16  693.20 646.263   1
   1 -12 -16 -547.88 388.659   1
  -1  12  16  141.42 212.993  -1
   1 -12 -15  975.21 674.051   1
   1 -12 -15  694.33 403.680   1
  -1  12  15 1190.01 283.515   1
   1 -12 -14 4630.11 869.319   1
   1 -12 -14 5414.94 649.643   1
  -1  12  14 8501.68 560.270   1
   1 -12 -13   27.60 378.520  -1
   1 -12 -13 -524.60 618.475   1
  -1  12  13  334.02 242.846   1
   1 -12 -12 1321.44 738.640   1
   1 -12 -12 1962.45 480.285   1
  -1  12  12 2594.82 335.223   1
   1 -12 -11 4198.27 856.552   1
   1 -12 -11 4731.50 626.736   1
  -1  12  11 6717.98 500.187   1
  -1  12  11 5730.37 725.872   1
   1 -12 -10  176.04 384.153   1
   1 -12 -10  483.66 629.740   1
  -1  12  10  800.22 263.124   1
  -1  12  10  153.62 426.586   1
   1 -12  -9  579.05 419.827   1
   1 -12  -9  781.82 647.390  -1
  -1  12   9 1516.33 520.090   1
  -1  12   9  838.53 267.518   1
   1 -12  -8 6875.70 992.864   1
   1 -12  -8 6387.53 708.974   1
  -1 -12   8 4817.87 500.938   1
   1  12  -8 8122.41 396.169   1
   1  12  -8 9346.59 555.764   1
  -1  12   8 7671.79 514.832   1
  -1  12   8 9271.49 885.467   1
   1 -12  -7  705.22 451.370   1
   1 -12  -7  638.00 753.661   1
  -1 -12   7  370.45 439.729   1
  -1 -12   7   76.57 487.795   1
   1  12  -7  728.13 458.129   1
   1  12  -7  754.41 223.995   1
  -1  12   7  475.78 242.471   1
   1 -12  -6 1980.85 787.457   1
   1 -12  -6 2801.72 538.490   1
  -1 -12   6 2123.92 535.486   1
  -1 -12   6 2119.41 571.160   1
   1  12  -6 1865.19 283.590   1
   1  12  -6 2948.18 558.017   1
  -1  12   6 2647.39 610.213   1
  -1  12   6 2473.52 355.952   1
   1 -12  -5 3631.99 855.425   1
   1 -12  -5 3558.01 599.699   1
  -1 -12   5 3617.35 567.405   1
   1  12  -5 4607.58 367.292   1
  -1  12   5 4111.90 431.843   1
  -1  12   5 4509.95 687.945   1
   1 -12  -4  917.01 653.398   1
   1 -12  -4 1198.27 480.660   1
  -1 -12   4  596.32 487.044   1
  -1 -12   4  608.71 520.465   1
   1  12  -4  622.98 250.507  -1
   1  12  -4 1568.53 542.245   1
  -1  12   4  883.59 272.324   1
  -1  12   4 1096.51 490.048   1
   1 -12  -3  100.23 612.467   1
   1 -12  -3  582.80 463.762   1
  -1 -12   3  689.45 529.102   1
  -1 -12   3  722.49 475.028   1
   1  12  -3  273.26 251.896   1
   1  12  -3  880.59 522.343   1
  -1  12   3  760.80 260.683   1
  -1  12   3  322.64 496.432   1
   1 -12  -2 4821.62 675.178   1
   1 -12  -2 4126.92 831.017   1
  -1 -12   2 5553.88 727.374   1
   1  12  -2 6901.98 783.326   1
   1  12  -2 5906.87 472.775   1
  -1  12   2 6064.58 460.758   1
  -1  12   2 6875.70 785.955   1
   1 -12  -1 1280.89 500.938   1
   1 -12  -1  679.68 674.802   1
  -1 -12   1  776.94 537.739   1
  -1 -12   1  189.15 458.505   1
   1  12  -1  633.50 252.384   1
   1  12  -1 1190.76 534.735   1
  -1  12   1  965.45 519.339   1
  -1  12   1  628.99 246.113   1
   1 -12   0 4093.12 620.352   1
  -1 -12   0 4265.86 602.703   1
   1  12   0 6477.65 738.264   1
   1  12   0 5152.08 426.962   1
  -1  12   0 5358.61 729.628   1
  -1  12   0 5779.19 449.493   1
   1 -12   1 9823.50 1027.04   1
   1 -12   1  11442. 864.438   1
  -1 -12  -1 9361.61 987.232   1
  -1 -12  -1  12294. 928.275   1
   1  12   1  15584. 760.420   1
   1  12   1  14931. 1034.17   1
  -1  12  -1  15385. 736.011   1
  -1  12  -1  16988. 1094.25   1
   1 -12   2 1871.57 696.207   1
  -1 -12  -2 1780.32 651.520   1
  -1 -12  -2 1774.31 532.857   1
   1  12   2 2451.74 571.911   1
   1  12   2 2564.77 330.830   1
  -1  12  -2 1679.68 533.233   1
   1 -12   3  708.60 671.047   1
   1 -12   3  993.62 515.583   1
   1  12   3 1602.33 301.427   1
   1  12   3 2296.28 561.396   1
  -1  12  -3 2100.64 556.515   1
  -1  12  -3 1930.15 304.881   1
   1 -12   4 6008.26 703.717   1
   1 -12   4 4213.29 811.866   1
  -1 -12  -4 4292.15 801.351   1
  -1 -12  -4 4183.25 672.925   1
   1  12   4 4637.62 444.611   1
   1  12   4 6481.41 731.881   1
  -1  12  -4 5309.80 402.929   1
  -1  12  -4 4926.77 705.970   1
   1 -12   5 3555.01 639.128   1
   1 -12   5 5178.37 766.428   1
  -1 -12  -5 6661.65 937.663   1
  -1 -12  -5 4855.42 669.921   1
   1  12   5 5373.63 469.771   1
   1  12   5 5092.00 724.370   1
  -1  12  -5 5692.82 409.312   1
   1 -12   6 2523.47 666.165   1
   1 -12   6 1722.87 561.772   1
  -1 -12  -6 2374.39 740.517   1
  -1 -12  -6 1621.10 525.722   1
  -1  12  -6 1734.51 284.754   1
  -1  12  -6 2479.91 605.707   1
   1 -12   7 2391.29 624.483   1
   1 -12   7 3537.36 658.655   1
  -1 -12  -7 3830.26 835.148  -1
  -1 -12  -7 3758.91 611.340   1
   1  12   7 5486.29 772.436   1
   1  12   7 5655.27 456.627   1
  -1  12  -7 5069.47 386.030   1
  -1  12  -7 6293.65 677.806   1
   1 -12   8 3535.86 528.727  -1
   1 -12   8 5035.67 567.780  -1
  -1 -12  -8 4832.89 817.123   1
  -1 -12  -8 5073.22 678.933   1
   1  12   8 6406.30 486.669   1
   1  12   8 5392.41 720.991   1
  -1  12  -8 6789.33 550.506   1
  -1  12  -8 6165.97 419.827   1
  -1 -12  -9   76.27 412.692   1
  -1 -12  -9  137.78 586.931   1
   1  12   9  446.86 446.113   1
   1  12   9  223.66 234.622   1
  -1 -12 -10 6556.51 934.284   1
   1  12  10 5895.60 538.865   1
   1  12  10 7562.89 776.943   1
  -1 -12 -11 6901.98 707.097   1
  -1 -12 -11 8295.15 980.097   1
   1  12  11 9117.53 556.515   1
  -1 -12 -12  -66.02 344.911   1
   1  12  12 -108.41 206.984   1
  -1 -12 -13 1331.58 673.300   1
  -1 -12 -13  613.59 410.439   1
   1  12  13 1648.52 289.936   1
  -1 -12 -14 5238.45 837.776   1
  -1 -12 -14 4521.21 598.948   1
   1  12  14 7007.13 505.820   1
  -1 -12 -15  749.15 601.201   1
  -1 -12 -16 1657.15 464.138   1
  -1 -12 -16  607.96 616.597   1
   1  12  16 1497.56 281.825   1
  -1 -12 -17 1426.21 448.366   1
   1  12  17 2844.16 353.661  -1
  -1 -12 -18 -317.95 321.216   1
   1  12  18  114.65 240.631   1
   1 -13 -16 3405.93 567.029   1
  -1  13  16 7893.35 654.900   1
   1 -13 -15  297.52 382.651   1
  -1  13  15  768.68 319.113   1
   1 -13 -14 -311.27 336.275   1
   1 -13 -13  333.80 671.423   1
   1 -13 -13  251.07 388.659   1
  -1  13  13   63.31 259.707   1
   1 -13 -12 2956.81 764.551  -1
   1 -13 -12 2811.86 541.494   1
  -1  13  12 4682.68 467.893   1
   1 -13 -11  348.40 655.651   1
   1 -13 -11  171.84 363.537   1
  -1  13  11 -389.79 245.362   1
   1 -13 -10 2966.95 832.894   1
   1 -13 -10 2592.56 550.882   1
  -1  13  10 6567.77 547.502   1
   1 -13  -9 -316.56 650.018   1
   1 -13  -9  370.22 415.321   1
  -1  13   9  652.27 306.496   1
   1 -13  -8  155.91 612.091   1
   1 -13  -8   51.78 431.092   1
  -1  13   8  309.43 498.310   1
  -1  13   8 -121.59 279.271   1
   1 -13  -7  420.20 467.142   1
   1 -13  -7  438.98 679.308   1
  -1 -13   7 -402.55 463.387   1
  -1 -13   7 -135.60 610.589   1
  -1  13   7  829.89 520.465   1
  -1  13   7 -220.92 266.579   1
   1 -13  -6 3149.08 892.602   1
   1 -13  -6 4401.05 666.916   1
  -1 -13   6 3803.98 791.212   1
  -1 -13   6 4141.94 672.925   1
   1  13  -6 5061.96 439.729   1
   1  13  -6 6714.23 779.947   1
  -1  13   6 7146.07 839.654   1
  -1  13   6 6199.77 508.073   1
   1 -13  -5 -827.26 614.344   1
   1 -13  -5 -325.08 431.092   1
  -1 -13   5  471.65 631.242   1
  -1 -13   5 -146.38 538.490   1
   1  13  -5   -6.24 609.838   1
   1  13  -5   98.46 269.320   1
  -1  13   5  392.04 516.710   1
  -1  13   5  198.39 257.228   1
   1 -13  -4 4769.05 714.231   1
  -1 -13   4 4070.59 693.953   1
  -1 -13   4 3852.79 738.640   1
   1  13  -4 6057.07 844.535  -1
   1  13  -4 5242.20 484.416   1
  -1  13   4 5794.21 528.351   1
   1 -13  -3  633.12 534.359   1
   1 -13  -3 -150.66 669.921   1
  -1 -13   3  184.98 560.645   1
   1  13  -3   34.44 603.079   1
  -1  13   3  529.48 283.289   1
  -1  13   3   49.34 543.372   1
   1 -13  -2  738.26 750.281   1
  -1 -13   2 -355.80 593.315   1
  -1 -13   2  255.20 544.874   1
   1  13  -2 -381.15 571.911  -1
   1  13  -2  101.31 275.253   1
  -1  13   2  667.29 574.915   1
   1 -13  -1  -45.85 544.498   1
   1 -13  -1   76.49 755.914   1
  -1 -13   1 -234.58 520.465   1
  -1 -13   1 -225.46 600.075   1
   1  13  -1  306.31 292.902   1
  -1  13   1 -129.22 263.800   1
  -1  13   1  101.80 511.828   1
   1 -13   0 4889.22 734.509   1
   1 -13   0 5276.00 970.709   1
  -1 -13   0 5557.64 763.048   1
  -1 -13   0 4491.17 825.760   1
   1  13   0 7968.45 871.573  -1
   1  13   0 7859.55 583.176   1
  -1  13   0 8546.74 901.238   1
  -1  13   0 8659.40 595.944   1
   1 -13   1   81.37 579.797   1
   1 -13   1  769.81 740.517   1
  -1 -13  -1  333.50 624.859   1
  -1 -13  -1  463.01 529.102   1
   1  13   1 1987.98 606.083   1
   1  13   1  714.98 300.676   1
  -1  13  -1  387.53 320.578   1
  -1  13  -1 1304.17 618.475   1
   1 -13   2 2964.70 819.376   1
   1 -13   2 3965.45 739.766   1
  -1 -13  -2 4663.91 842.282   1
   1  13   2 5197.14 770.934   1
  -1  13  -2 4765.30 465.640  -1
  -1  13  -2 6177.24 799.849   1
   1 -13   3 1342.85 691.700   1
  -1 -13  -3  775.06 625.234   1
  -1 -13  -3   39.65 492.301   1
   1  13   3 1253.47 317.649   1
   1  13   3  734.13 589.185   1
  -1  13  -3  683.44 597.821   1
   1 -13   4  146.83 696.958   1
   1 -13   4  937.29 613.593   1
  -1 -13  -4  274.24 459.632   1
   1  13   4   60.16 265.189   1
  -1  13  -4 -123.51 597.446   1
  -1  13  -4  -20.83 288.209   1
   1 -13   5 1352.98 678.182  -1
   1 -13   5  841.16 674.051   1
  -1 -13  -5 -398.05 621.479   1
  -1 -13  -5 1009.39 475.403   1
   1  13   5  825.01 285.430   1
   1  13   5 1373.26 625.610   1
  -1  13  -5  472.77 308.073   1
  -1  13  -5  783.70 663.537   1
   1 -13   6 7814.49 961.696   1
   1 -13   6 8542.99 944.798   1
  -1 -13  -6 8888.46 851.295   1
  -1 -13  -6  10342. 1057.45   1
   1  13   6  13181. 743.897   1
   1  13   6  10406. 932.031   1
  -1  13  -6  13301. 1045.44   1
  -1  13  -6  12377. 674.051   1
   1 -13   7  373.00 684.941   1
   1 -13   7  892.60 627.112  -1
  -1 -13  -7  355.65 477.281   1
  -1 -13  -7  277.51 623.732  -1
   1  13   7  200.45 267.442   1
   1  13   7  400.68 497.183   1
   1 -13   8 2598.57 520.465   1
  -1 -13  -8 2746.15 734.134   1
  -1 -13  -8 2343.60 591.438   1
   1  13   8 4288.39 484.416   1
   1  13   8 3627.48 711.603   1
  -1 -13  -9  -83.70 475.779   1
   1  13   9 1571.53 362.448   1
  -1 -13 -10  989.11 496.432   1
  -1 -13 -10 1572.66 734.509   1
   1  13  10 1870.07 356.290   1
   1  13  11  326.44 274.239   1
  -1 -13 -12 3684.94 882.838   1
  -1 -13 -13  139.65 368.494   1
  -1 -13 -13  263.65 675.178   1
   1  13  13  552.01 269.696   1
  -1 -13 -14  355.01 406.684   1
   1  13  14  397.67 298.685   1
  -1 -13 -15  363.76 432.970   1
  -1  14  13  286.29 319.527   1
   1 -14 -12 1174.61 412.692   1
  -1  14  12 2743.14 461.885   1
   1 -14 -11  106.20 330.003   1
  -1  14  11  162.64 347.878  -1
   1 -14 -10 1693.95 437.852   1
   1 -14 -10 1041.31 597.446   1
  -1  14  10 1781.07 448.366   1
   1 -14  -9   62.26 562.523   1
   1 -14  -9   84.90 349.230   1
  -1  14   9  473.53 373.225   1
   1 -14  -8 1536.99 686.443   1
   1 -14  -8 1905.37 443.860   1
  -1  14   8 5662.78 629.740   1
   1 -14  -7   -8.61 396.920   1
   1 -14  -7  -18.13 594.442  -1
  -1  14   7 -316.41 332.294   1
   1 -14  -6  606.08 431.843   1
   1 -14  -6  613.97 688.696   1
  -1  14   6 1547.13 387.157   1
   1 -14  -5  100.56 728.125   1
  -1  14   5   26.65 478.407   1
   1 -14  -4  152.12 692.827   1
   1 -14  -4  610.96 485.918   1
  -1  14   4 1145.70 547.878   1
  -1  14   4 1428.46 380.398   1
   1 -14  -3  625.61 489.297   1
   1 -14  -3  446.86 723.619   1
  -1  14   3 -124.26 335.261   1
  -1  14   3   64.25 615.471   1
   1 -14  -2 2589.93 931.280   1
   1 -14  -2 2092.75 561.772   1
  -1 -14   2 1464.51 595.568   1
  -1 -14   2 2553.13 717.611   1
  -1  14   2 3552.01 503.567   1
   1 -14  -1  252.35 504.693   1
   1 -14  -1 -615.85 768.306   1
  -1 -14   1   63.80 496.057   1
  -1 -14   1  674.05 688.696   1
  -1  14   1  422.08 594.066   1
  -1  14   1  543.75 366.541   1
   1 -14   0 1797.22 798.722   1
  -1 -14   0  834.77 772.812   1
   1  14   0  563.27 436.350   1
   1  14   0 1051.44 651.896   1
  -1  14   0  903.12 685.692   1
   1 -14   1  815.62 691.700   1
   1 -14   1 -315.36 526.849   1
  -1 -14  -1  244.01 706.346   1
  -1 -14  -1  594.44 516.710   1
   1  14   1  444.24 555.013   1
   1  14   1  -34.55 312.692   1
   1 -14   2 1579.04 579.046   1
   1 -14   2 2324.44 782.951   1
  -1 -14  -2  773.19 524.220   1
  -1 -14  -2 1284.26 767.179   1
   1  14   2 2367.63 432.594   1
  -1 -14  -3 -297.97 485.918   1
  -1 -14  -3  371.54 641.757   1
   1  14   3 -432.22 320.315   1
   1  14   3 -192.60 552.008   1
  -1 -14  -4 4596.32 848.666   1
  -1 -14  -4 3856.55 642.508   1
   1  14   4 6729.25 807.359   1
   1  14   4 6357.49 597.446   1
  -1 -14  -5 -336.20 606.458   1
  -1 -14  -5  515.58 388.659   1
   1  14   5 -630.49 446.864   1
  -1 -14  -6  216.75 390.912   1
  -1 -14  -6  297.03 630.867   1
   1  14   6  345.93 332.745   1
  -1 -14  -7  -95.57 411.190   1
  -1 -14  -7  308.67 504.693   1
  -1 -14  -8 1033.42 534.359   1
  -1 -14  -8 1412.32 417.574   1
   1  14   8 4386.03 622.605   1
  -1 -14  -9 -181.79 496.808   1
  -1 -14 -10 2424.33 594.817   1
  -1 -14 -10 2784.45 513.706   1
   1  14  10 7746.89 693.202   1
  -1 -14 -11 -258.96 315.246   1
   1  14  11  459.63 365.264   1
  -1 -14 -12 -309.20 349.568   1
   1  14  12  389.79 342.884   1
   2   0 -37  339.88 479.909   1
  -2   0  37 -157.98 371.460   1
  -2   0  37 -259.67 306.834   1
   2   0 -36  380.02 536.237   1
  -2   0  36  346.19 419.076   1
  -2   0  36  354.86 243.034   1
   2   0 -35 -534.73 601.952   1
   2   0 -35  289.22 614.344   1
  -2   0  35   42.62 452.121  -1
  -2   0  35 -335.52 224.145   1
   2   0 -34  14074. 1193.77   1
   2   0 -34  14589. 1144.20   1
  -2   0  34  17435. 1099.14   1
   2   0 -33 -220.35 521.592   1
   2   0 -33 -126.29 511.453   1
  -2   0  33 -492.30 472.775   1
  -2   0  33   64.89 189.448  -1
   2   0 -32 4438.60 768.681   1
   2   0 -32 6158.46 806.233   1
  -2   0  32 4243.33 745.775   1
   2   0 -31 -266.99 497.934   1
   2   0 -31   51.30 498.310   1
  -2   0  31   24.08 498.310   1
  -2   0  31 -304.99 175.291   1
   2   0 -30  -90.35 491.175   1
   2   0 -30  408.94 515.583   1
  -2   0  30  -68.01 395.043   1
  -2   0  30  107.81 188.885   1
   2   0 -29 -517.46 481.036   1
   2   0 -29  258.05 427.713   1
  -2   0  29  -62.97 173.226   1
  -2   0  29   29.67 375.178   1
   2   0 -28  25794. 1347.73   1
   2   0 -28  27202. 1436.72   1
  -2   0  28  25543. 1029.66   1
  -2   0  28  26511. 1293.28   1
   2   0 -27   96.81 393.541   1
   2   0 -27  286.56 458.129   1
  -2   0  27  164.03 181.224  -1
  -2   0  27 -574.54 380.398   1
   2   0 -26  27529. 1365.38   1
   2   0 -26  28979. 1433.72   1
  -2   0  26  27045. 1303.42   1
  -2   0  26  28359. 1105.52   1
   2   0 -25  -16.44 357.228   1
   2   0 -25  179.12 392.790   1
  -2   0  25  438.98 366.466  -1
  -2   0  25    2.84 167.668   1
   2   0 -24  334.89 386.781   1
  -2   0  24  429.97 367.142   1
   2   0 -23  -79.38 369.921   1
   2   0 -23  381.90 344.235   1
  -2   0  23   66.50 164.739   1
  -2   0  23  367.44 341.156   1
   2   0 -22  60308. 2304.92   1
   2   0 -22  63763. 2440.48   1
  -2   0  22  63950. 2204.28   1
  -2   0  22  64476. 2400.30   1
   2   0 -21 -147.84 351.783   1
   2   0 -21 -408.94 343.935   1
  -2   0  21  -25.76 152.835   1
  -2   0  21  777.69 357.191   1
   2   0 -20  64439. 2380.77   1
   2   0 -20  58956. 2238.45   1
  -2   0  20  68607. 2486.29   1
  -2   0  20  60796. 2096.13   1
   2   0 -19  160.53 293.916   1
   2   0 -19  140.44 263.387   1
  -2   0  19  -43.41 284.341   1
  -2   0  19  231.81 158.092   1
   2   0 -18  14337. 805.106   1
   2   0 -18  14367. 782.200   1
  -2   0  18  13308. 763.799   1
  -2   0  18  13973. 637.251   1
   2   0 -17  109.16 245.212   1
   2   0 -17   76.27 257.867   1
  -2   0  17   -0.91 228.088   1
  -2   0  17  -71.84 144.574   1
   2   0 -16 252647. 8103.63   1
   2   0 -16 247991. 7979.71   1
  -2   0  16 242433. 7803.22   1
  -2   0  16 251408. 7960.94   1
   2   0 -15   94.07 256.553   1
  -2   0  15  -48.25 201.577   1
   2   0 -14 108712. 3644.76   1
   2   0 -14 109876. 3656.77   1
  -2   0  14 106834. 3563.65   1
  -2   0  14 105633. 3441.98  -1
   2   0 -13 -209.54 208.787   1
   2   0 -13  -22.32 188.960   1
  -2   0  13   96.32 175.516   1
  -2   0  13  118.36 127.075   1
   2   0 -12 138903. 4461.13   1
   2   0 -12 143710. 4663.91  -1
  -2   0  12 143297. 4585.05   1
  -2   0  12 144123. 4678.93   1
   2   0 -11   38.42 125.159   1
   2   0 -11   63.61 153.849   1
  -2   0  11   66.54 158.731   1
  -2   0  11  357.49 131.243   1
   2   0 -10 247202. 7765.67   1
   2   0 -10 260571. 8220.04   1
  -2   0  10 257867. 8152.45   1
  -2   0  10 247315. 7765.67   1
   2   0  -9  126.77 106.684   1
   2   0  -9  115.96 132.482   1
  -2   0   9  335.26 142.095   1
  -2   0   9  191.33 110.364   1
   2   0  -8 131130. 4194.51   1
  -2   0   8 136538. 4329.70   1
   2   0  -7   92.04 108.562   1
   2   0  -7  258.47  96.733   1
  -2   0   7    5.49 115.396  -1
  -2   0   7  -32.55  87.758   1
   2   0  -6 260195. 8118.66   1
   2   0  -6 261059. 8159.96   1
  -2   0   6 267180. 8332.70  -1
  -2   0   6 260533. 8152.45   1
   2   0  -5  188.62  85.843   1
   2   0  -5  133.65  75.253   1
  -2   0   5  207.59  87.157   1
  -2   0   5  153.66  76.192  -1
   2   0  -4 110552. 3488.54   1
   2   0  -4 108975. 3432.59   1
  -2   0   4 110439. 3488.54   1
  -2   0   4 110702. 3481.03   1
   2   0  -3   28.20  51.446  -1
  -2   0   3   22.17  57.867   1
  -2   0   3   52.08  59.444   1
   2   0  -2 1219.30  86.294   1
  -2   0   2 1098.38  93.203   1
   2   0  -1  141.38  51.033   1
   2   0   1   97.30  60.383   1
  -2   0  -1  108.75  60.496   1
  -2   0  -1  106.27  74.052   1
   2   0   2  99587. 3144.95   1
  -2   0  -2  93128. 2944.42   1
  -2   0  -2  88659. 2796.47   1
   2   0   3  132.11  94.292   1
   2   0   3   46.38  80.736   1
  -2   0  -3  101.50  79.459   1
  -2   0  -3  -68.46  96.470   1
   2   0   4  52948. 1734.51   1
   2   0   4  59669. 1944.80   1
  -2   0  -4  52610. 1714.23   1
   2   0   5   95.64 107.247   1
   2   0   5  -59.41 120.165  -1
  -2   0  -5  -92.08 115.208   1
  -2   0  -5  146.11 101.765   1
   2   0   6  11585. 486.293   1
  -2   0  -6  10417. 468.268   1
   2   0   7  166.54 131.844   1
   2   0   7  106.50 129.102   1
  -2   0  -7   87.04 120.278   1
  -2   0  -7  104.92 137.476   1
   2   0   8 143184. 4592.56  -1
   2   0   8 139429. 4476.15   1
  -2   0  -8 135374. 4367.25   1
  -2   0  -8 146151. 4663.91   1
   2   0   9  132.18 170.409   1
   2   0   9  209.61 160.984   1
  -2   0  -9  191.02 140.330   1
  -2   0  -9   13.09 161.622   1
   2   0  10  12685. 597.821   1
   2   0  10  11397. 567.780   1
  -2   0 -10  10856. 512.955   1
  -2   0 -10  13083. 624.859   1
   2   0  11  425.46 227.075   1
   2   0  11  103.08 183.289   1
  -2   0 -11   34.68 160.158   1
  -2   0 -11   71.72 173.000   1
   2   0  12 145775. 4776.56   1
   2   0  12 144010. 4682.68   1
  -2   0 -12 144236. 4727.75   1
  -2   0 -12 145475. 4708.97   1
   2   0  13 -226.36 200.338   1
  -2   0 -13 -109.88 199.286   1
   2   0  14 171573. 5565.15   1
   2   0  14 176230. 5771.68   1
  -2   0 -14 171160. 5602.70   1
  -2   0 -14 174127. 5636.50   1
   2   0  15  171.50 231.205   1
   2   0  15  293.02 277.356   1
  -2   0 -15  106.57 239.692   1
  -2   0 -15  157.12 207.961   1
   2   0  16  65903. 2454.75   1
  -2   0 -16  71348. 2558.77   1
   2   0  17  162.56 258.242   1
   2   0  17   50.24 146.714   1
  -2   0 -17   60.76 260.345   1
  -2   0 -17   -7.66 249.117   1
   2   0  18  95869. 3189.26   1
   2   0  18  95494. 3279.01   1
  -2   0 -18  95231. 3340.97   1
  -2   0 -18 100375. 3438.98   1
   2   0  19  217.27 269.508   1
   2   0  19  -24.08 160.045   1
  -2   0 -19   72.66 289.485   1
  -2   0 -19  140.41 277.994   1
   2   0  20  49380. 1873.45   1
   2   0  20  45888. 1647.01   1
  -2   0 -20  48817. 1944.80   1
  -2   0 -20  52309. 1983.85   1
   2   0  21  206.53 301.201   1
   2   0  21  154.90 152.384  -1
  -2   0 -21  124.97 296.920  -1
  -2   0 -21 -102.33 324.821   1
   2   0  22  53173. 2030.04   1
  -2   0 -22  54262. 2093.50  -1
   2   0  23   91.25 154.900  -1
   2   0  23  -55.95 334.134   1
  -2   0 -23  -87.42 331.768   1
  -2   0 -23 -557.64 347.653   1
   2   0  24  53736. 1900.49   1
   2   0  24  55013. 2116.41   1
  -2   0 -24  58243. 2250.84  -1
  -2   0 -24  57829. 2306.42   1
   2   0  25   87.95 148.667   1
   2   0  25  443.11 393.165   1
  -2   0 -25  345.29 383.026  -1
  -2   0 -25  112.13 342.020   1
   2   0  26 8494.17 478.032   1
  -2   0 -26 9312.80 810.739   1
  -2   0 -26 8689.44 734.134   1
   2   0  27 -107.96 364.588   1
   2   0  27  -32.01 147.766   1
  -2   0 -27   28.43 387.157   1
  -2   0 -27  -35.78 386.406   1
   2   0  28  12283. 613.593   1
   2   0  28  13297. 865.564   1
  -2   0 -28  10357. 819.000   1
  -2   0 -28  11021. 901.989   1
   2   0  29  226.55 424.333   1
   2   0  29  -56.97 143.710   1
  -2   0 -29 -228.95 404.806   1
  -2   0 -29 -169.02 489.297   1
   2   0  30  13226. 906.496   1
   2   0  30  11731. 587.682   1
  -2   0 -30  10717. 966.578   1
  -2   0 -30  10507. 984.603   1
   2   0  31   12.04 160.458   1
   2   0  31 -220.35 416.072   1
  -2   0 -31  326.62 500.563   1
  -2   0 -31  114.65 466.766   1
   2   0  32  737.89 488.546  -1
   2   0  32  850.92 215.809   1
  -2   0 -32   63.01 465.264   1
  -2   0 -32  317.46 520.465   1
   2   0  33  143.45 185.805   1
   2   0  33 -288.17 460.758   1
  -2   0 -33 -133.53 579.421   1
  -2   0 -33  -24.11 486.669   1
   2   0  34 5812.99 668.794  -1
  -2   0 -34 4904.24 816.372   1
   2   0  35  -27.94 236.124   1
   2   0  35   80.70 407.059   1
  -2   0 -35  274.28 520.090   1
   2   0  36 7217.42 669.169   1
  -2   0 -36 6139.69 782.575   1
   2  -1 -38   60.50 438.603   1
  -2   1  38  687.19 354.036   1
   2  -1 -37  804.36 548.253   1
  -2  -1  37  502.06 457.003   1
  -2   1  37  536.24 381.149   1
   2  -1 -36 6654.14 840.405   1
  -2  -1  36 6980.84 716.860   1
   2   1 -36 5088.24 904.994   1
   2   1 -36 5399.92 815.996   1
  -2   1  36 6256.10 646.638   1
   2  -1 -35  251.97 544.874  -1
  -2  -1  35  552.01 270.860   1
  -2  -1  35 1083.36 536.237   1
   2   1 -35 1098.76 645.888   1
   2   1 -35 -289.56 698.460   1
  -2   1  35  596.69 239.016   1
   2  -1 -34  713.48 627.487   1
   2  -1 -34 1437.85 674.051   1
  -2  -1  34 1450.62 286.894   1
  -2  -1  34  594.82 575.290  -1
   2   1 -34 1179.12 659.782   1
   2   1 -34 1612.09 680.435   1
  -2   1  34  899.74 518.588   1
  -2   1  34 1354.49 279.196   1
   2  -1 -33 1288.77 571.535  -1
   2  -1 -33  639.13 533.984   1
  -2  -1  33 1164.85 261.322   1
  -2  -1  33  659.03 514.832   1
   2   1 -33   62.75 649.643   1
   2   1 -33 1152.83 601.201  -1
  -2   1  33 1431.84 508.073   1
  -2   1  33 1227.19 254.037   1
  -2  -1  32 2241.45 561.396   1
  -2  -1  32 1651.52 277.469   1
   2   1 -32 1168.23 606.083   1
   2   1 -32  986.48 644.010   1
  -2   1  32 1918.14 272.850   1
  -2   1  32 1466.01 510.326   1
   2  -1 -31 1588.43 557.266   1
  -2  -1  31 1651.52 266.992   1
  -2  -1  31 1427.71 524.596   1
   2   1 -31 2082.99 613.969   1
   2   1 -31 1817.12 593.691   1
  -2   1  31 1561.77 522.343   1
  -2   1  31 1457.38 246.376   1
   2  -1 -30  11731. 1055.58   1
   2  -1 -30  13244. 1020.28   1
  -2  -1  30  12017. 601.201   1
  -2  -1  30  12632. 903.116  -1
   2   1 -30  11780. 985.729  -1
   2   1 -30  12974. 1013.14   1
  -2   1  30  11769. 862.936  -1
  -2   1  30  13586. 654.524   1
   2  -1 -29 1159.97 565.152   1
  -2  -1  29  381.90 188.321   1
  -2  -1  29  687.95 460.383   1
   2   1 -29  101.99 475.403   1
  -2   1  29  607.21 427.337   1
   2  -1 -28 4273.37 673.300   1
   2  -1 -28 4675.17 660.533   1
  -2  -1  28 5399.92 383.026   1
  -2  -1  28 4585.05 596.319   1
   2   1 -28 5155.83 638.377   1
   2   1 -28 5411.19 656.777  -1
  -2   1  28 5764.17 641.381   1
  -2   1  28 6338.71 422.831   1
   2  -1 -27 7300.03 745.775   1
   2  -1 -27 7645.51 720.615   1
  -2  -1  27 7562.89 449.868   1
  -2  -1  27 6387.53 619.226   1
   2   1 -27 6511.45 678.557   1
   2   1 -27 7085.99 708.974   1
  -2   1  27 7713.10 676.304   1
  -2   1  27 7085.99 440.480   1
   2  -1 -26 6323.69 692.451   1
   2  -1 -26 5936.91 632.369   1
  -2  -1  26 6511.45 618.850   1
   2   1 -26 7859.55 705.219   1
  -2   1  26 6526.47 422.455   1
  -2   1  26 6954.56 654.524   1
   2  -1 -25 3645.88 520.090   1
  -2  -1  25 3792.71 497.183   1
  -2  -1  25 4288.39 335.298   1
   2   1 -25 3328.57 503.567   1
   2   1 -25 3173.86 518.588   1
  -2   1  25 3702.21 328.727   1
   2  -1 -24  49793. 2033.04   1
   2  -1 -24  52234. 2171.23   1
  -2  -1  24  50319. 1959.07   1
  -2  -1  24  49981. 1760.42   1
   2   1 -24  50845. 2025.53   1
   2   1 -24  50469. 2012.01   1
  -2   1  24  50357. 2029.66   1
  -2   1  24  52159. 1856.55   1
   2  -1 -23 1457.75 395.794   1
   2  -1 -23 1416.45 461.134   1
  -2  -1  23  774.31 186.106   1
  -2  -1  23  658.66 328.088   1
   2   1 -23 1250.84 372.399   1
   2   1 -23  937.66 353.999   1
  -2   1  23  829.14 203.755   1
  -2   1  23  771.69 384.904   1
   2  -1 -22  18415. 1058.20   1
  -2  -1  22  16572. 716.109   1
  -2  -1  22  15344. 834.021   1
   2   1 -22  16410. 891.099   1
   2   1 -22  15606. 856.927   1
  -2   1  22  17191. 965.076   1
   2  -1 -21 9335.33 708.223   1
   2  -1 -21 8561.76 666.916   1
  -2  -1  21 8051.06 442.733   1
   2   1 -21 8711.97 618.099   1
  -2   1  21 8066.08 464.138   1
  -2   1  21 8655.64 659.782   1
   2  -1 -20  43673. 1793.46   1
   2  -1 -20  41945. 1713.48   1
  -2  -1  20  41307. 1478.78   1
  -2  -1  20  42696. 1664.29   1
   2   1 -20  44198. 1741.27   1
   2   1 -20  42696. 1675.93   1
  -2   1  20  44837. 1787.83   1
  -2   1  20  39317. 1455.12   1
   2  -1 -19  -41.49 296.507   1
   2  -1 -19 -195.31 285.017   1
  -2  -1  19  158.69 268.081   1
  -2  -1  19   31.06 148.479   1
   2   1 -19   31.17 248.066   1
   2   1 -19  152.12 275.967   1
  -2   1  19 -208.90 165.565   1
  -2   1  19  298.31 309.350   1
   2  -1 -18 127262. 4303.41   1
   2  -1 -18 124596. 4269.62  -1
  -2  -1  18 126136. 4078.10   1
  -2  -1  18 126774. 4213.29   1
   2   1 -18 125385. 4187.00   1
   2   1 -18 126324. 4228.31   1
  -2   1  18 128990. 4359.74   1
  -2   1  18 125272. 4096.88   1
   2  -1 -17  635.00 325.723   1
   2  -1 -17  647.77 285.730   1
  -2  -1  17  317.27 231.618   1
   2   1 -17  583.93 249.943   1
  -2   1  17  618.10 273.075   1
  -2   1  17  484.04 170.822   1
  -2  -1  16  47540. 1640.63   1
  -2  -1  16  42283. 1567.40   1
   2   1 -16  44837. 1659.03   1
   2   1 -16  45024. 1666.16   1
  -2   1  16  41908. 1675.18   1
  -2   1  16  46677. 1656.78   1
   2  -1 -15  64101. 2305.67   1
   2  -1 -15  65377. 2381.15   1
  -2  -1  15  62110. 2083.36   1
  -2  -1  15  62523. 2180.62   1
   2   1 -15  62298. 2171.98   1
   2   1 -15  68870. 2396.54   1
  -2   1  15  65941. 2358.62   1
  -2   1  15  60533. 2075.48   1
   2  -1 -14 200563. 6492.67   1
   2  -1 -14 197934. 6432.59   1
  -2  -1  14 219902. 6965.82   1
   2   1 -14 196583. 6304.91   1
   2   1 -14 197371. 6319.93   1
  -2   1  14 195268. 6233.57   1
  -2   1  14 201314. 6526.47   1
  -2  -1  13  788.21 148.329   1
  -2  -1  13  650.39 193.916  -1
   2   1 -13 1107.40 233.796   1
   2   1 -13  822.38 207.961   1
  -2   1  13 1596.69 267.367   1
   2  -1 -12 168719. 5463.76   1
   2  -1 -12 169020. 5399.92   1
  -2  -1  12 169658. 5433.72   1
  -2  -1  12 170146. 5384.90   1
   2   1 -12 170146. 5448.74   1
   2   1 -12 173000. 5523.84   1
  -2   1  12 168644. 5467.51   1
  -2   1  12 167856. 5366.12   1
   2  -1 -11 9241.45 509.575   1
   2  -1 -11 9196.39 457.003   1
  -2  -1  11 9083.73 400.300   1
  -2  -1  11 8392.78 425.460   1
   2   1 -11 8347.72 423.582   1
  -2   1  11 9725.86 529.853   1
  -2   1  11 8494.17 431.843   1
   2  -1 -10 1207.28 172.212   1
   2  -1 -10  846.79 206.008   1
  -2  -1  10 1490.80 150.019   1
   2   1 -10  906.50 164.251   1
  -2   1  10 1174.24 177.206   1
  -2   1  10 1010.14 206.947   1
   2  -1  -9  38828. 1355.99   1
   2  -1  -9  43335. 1543.00   1
  -2  -1   9  41870. 1428.46   1
  -2  -1   9  41720. 1384.15   1
   2   1  -9  42358. 1432.97   1
   2   1  -9  39805. 1332.71   1
  -2   1   9  43898. 1570.03  -1
  -2   1   9  40931. 1421.33   1
   2  -1  -8 228652. 7236.19   1
   2  -1  -8 236387. 7442.73   1
  -2  -1   8 231130. 7247.46   1
  -2  -1   8 239053. 7457.75   1
   2   1  -8 236650. 7405.17   1
   2   1  -8 241457. 7540.36   1
  -2   1   8 228126. 7228.68   1
  -2   1   8 232857. 7326.32   1
   2  -1  -7  336.42 139.316   1
   2  -1  -7  249.15 115.847   1
  -2  -1   7  412.69  82.651   1
  -2  -1   7  392.79 101.502   1
   2   1  -7  304.13  85.768   1
   2   1  -7  236.27  90.274   1
  -2   1   7  164.81 103.004   1
  -2   1   7  219.56 133.646   1
   2  -1  -6 292564. 9166.34   1
   2  -1  -6 314006. 9823.50   1
  -2  -1   6 308599. 9583.17   1
  -2  -1   6 298498. 9286.51   1
   2   1  -6 311566. 9677.05   1
  -2   1   6 299925. 9372.88  -1
   2  -1  -5 153999. 4881.71   1
  -2  -1   5 153511. 4799.09   1
   2   1  -5 151033. 4716.48   1
  -2   1   5 150357. 4746.52   1
   2  -1  -4 256778. 8017.27   1
   2  -1  -4 260045. 8129.92  -1
  -2  -1   4 260758. 8092.37   1
   2   1  -4 263612. 8174.98   1
   2   1  -4 283702. 8802.09   1
  -2   1   4 268456. 8377.76   1
   2  -1  -3  25550. 887.344   1
   2  -1  -3  23766. 832.894   1
  -2  -1   3  23552. 767.179   1
   2   1  -3  23308. 757.416   1
   2   1  -3  25719. 828.764   1
  -2   1   3  25576. 875.328   1
  -2   1   3  24161. 859.181   1
   2  -1  -2 164438. 5152.08   1
  -2  -1   2 159707. 4964.32   1
   2   1  -2 155163. 4825.38   1
  -2   1   2 164063. 5148.32   1
  -2   1   2 162749. 5088.24   1
   2  -1  -1  24307. 821.629   1
   2  -1  -1  22174. 754.412   1
  -2  -1   1  24589. 808.861   1
   2   1  -1  23124. 767.930   1
  -2   1   1  21780. 731.130   1
  -2   1   1  24041. 814.870   1
   2  -1   0  43710. 1401.80   1
   2  -1   0  48028. 1543.75   1
  -2  -1   0  45775. 1472.02   1
  -2  -1   0  43785. 1421.33   1
   2   1   0  45550. 1471.65   1
   2   1   0  45850. 1476.53   1
  -2   1   0  44837. 1447.24   1
  -2   1   0  44724. 1429.21   1
   2  -1   1 160045. 4986.85   1
   2  -1   1 171761. 5347.35   1
  -2  -1  -1 166091. 5200.90   1
  -2  -1  -1 160082. 5024.40   1
   2   1   1 168794. 5283.51   1
   2   1   1 161697. 5069.47   1
  -2   1  -1 165527. 5155.83   1
  -2   1  -1 166879. 5204.65   1
   2  -1   2 137852. 4303.41   1
   2  -1   2 138340. 4322.19   1
  -2  -1  -2 145475. 4596.32   1
   2   1   2 139880. 4404.80   1
   2   1   2 147165. 4641.38   1
  -2   1  -2 154412. 4821.62  -1
  -2   1  -2 148216. 4622.60   1
   2  -1   3 3493.43 176.680   1
  -2  -1  -3 4145.70 241.006   1
  -2  -1  -3 3841.53 243.785   1
   2   1   3 3864.06 228.013   1
   2   1   3 3954.18 250.957   1
  -2   1  -3 3496.05 186.669   1
  -2   1  -3 3503.94 175.741   1
   2  -1   4  53473. 1724.74   1
   2  -1   4  48216. 1560.64  -1
  -2  -1  -4  46789. 1591.81   1
   2   1   4  47127. 1580.92   1
  -2   1  -4  46752. 1524.59   1
  -2   1  -4  46151. 1490.80   1
   2  -1   5 1046.56 124.972   1
   2  -1   5 1095.38 145.588   1
  -2  -1  -5 1035.30 150.507   1
  -2  -1  -5 1140.44 179.835   1
   2   1   5 1100.64 164.551   1
  -2   1  -5  695.83 133.684   1
  -2   1  -5  886.59 116.635   1
   2  -1   6 155051. 4881.71   1
   2  -1   6 143710. 4536.23   1
  -2  -1  -6 139880. 4494.93   1
  -2  -1  -6 140067. 4476.15   1
   2   1   6 144048. 4615.09   1
   2   1   6 141382. 4521.21   1
  -2   1  -6 145287. 4570.03   1
  -2   1  -6 141532. 4483.66   1
   2  -1   7 185730. 5850.54  -1
  -2  -1  -7 189898. 6030.79   1
  -2  -1  -7 179271. 5737.88   1
   2   1   7 181487. 5790.46   1
   2   1   7 189335. 6034.54   1
  -2   1  -7 184378. 5828.01   1
   2  -1   8  46188. 1567.40   1
   2  -1   8  45362. 1533.98   1
  -2  -1  -8  45024. 1581.30   1
  -2  -1  -8  47127. 1676.30   1
   2   1   8  45550. 1613.97   1
   2   1   8  46264. 1633.12   1
  -2   1  -8  46076. 1543.75   1
  -2   1  -8  44273. 1522.34   1
   2  -1   9  13725. 589.185   1
   2  -1   9  13151. 566.278   1
  -2  -1  -9  13455. 648.141   1
  -2  -1  -9  14341. 642.508   1
   2   1   9  14405. 659.406   1
   2   1   9  14281. 665.414   1
  -2   1  -9  13567. 557.641   1
  -2   1  -9  13560. 597.446   1
   2  -1  10  54225. 1859.56   1
   2  -1  10  51633. 1760.04   1
  -2  -1 -10  53511. 1914.01   1
  -2  -1 -10  53211. 1858.80   1
   2   1  10  52084. 1842.66  -1
   2   1  10  53999. 1921.52   1
  -2   1 -10  53473. 1803.60   1
  -2   1 -10  52722. 1826.89   1
   2  -1  11 2576.79 291.288   1
   2  -1  11 3560.27 298.160   1
  -2  -1 -11 2619.60 292.752   1
   2   1  11 2858.05 307.360   1
  -2   1 -11 3762.67 356.477   1
  -2   1 -11 2840.78 267.442   1
   2  -1  12  94968. 3175.36   1
   2  -1  12  93654. 3092.37   1
  -2  -1 -12  90161. 3042.43   1
  -2  -1 -12  90800. 3099.88   1
   2   1  12  94855. 3239.95   1
   2   1  12  90274. 3054.82   1
  -2   1 -12  93241. 3064.21  -1
  -2   1 -12  90349. 3032.29   1
   2  -1  13 114044. 3785.20   1
   2  -1  13 111265. 3649.64   1
  -2  -1 -13 108036. 3657.15   1
  -2  -1 -13 111866. 3726.62   1
   2   1  13 109275. 3659.03   1
   2   1  13 112843. 3815.24   1
  -2   1 -13 112617. 3671.04   1
  -2   1 -13 112767. 3743.52   1
   2  -1  14  74991. 2667.67   1
  -2  -1 -14  67781. 2437.10   1
  -2  -1 -14  65490. 2326.70   1
   2   1  14  63387. 2319.94   1
   2   1  14  65978. 2347.73   1
  -2   1 -14  68119. 2389.03   1
  -2   1 -14  65640. 2242.21   1
   2  -1  15  130.04 240.781  -1
  -2  -1 -15  435.97 253.361   1
   2   1  15  347.88 292.039   1
  -2   1 -15    2.99 203.530   1
   2  -1  16 151971. 5046.93  -1
   2  -1  16 145963. 4757.79   1
   2   1  16 145099. 4806.60   1
  -2   1 -16 147953. 4900.48   1
  -2   1 -16 146226. 4765.30   1
   2  -1  17  36132. 1388.66   1
  -2  -1 -17  37071. 1544.50   1
  -2  -1 -17  37037. 1488.92   1
   2   1  17  38152. 1411.56   1
   2   1  17  39504. 1567.40   1
  -2   1 -17  36947. 1478.78   1
  -2   1 -17  37443. 1423.21   1
   2  -1  18  436.73 181.637  -1
  -2  -1 -18  581.30 301.577   1
  -2  -1 -18  686.44 289.861   1
   2   1  18  523.47 193.353   1
   2   1  18  763.05 296.658   1
  -2   1 -18  189.34 277.957   1
   2  -1  19 6883.21 408.186   1
   2  -1  19 6856.92 509.200   1
  -2  -1 -19 7382.64 609.087   1
  -2  -1 -19 6034.54 509.575   1
   2   1  19 5677.80 397.296   1
   2   1  19 6706.72 559.519   1
  -2   1 -19 6297.40 551.633   1
  -2   1 -19 6605.33 492.677   1
   2  -1  20  57416. 1984.23   1
   2  -1  20  59369. 2158.09   1
  -2  -1 -20  56891. 2146.07   1
   2   1  20  57642. 2173.11   1
  -2   1 -20  56816. 2080.73   1
  -2   1 -20  55651. 2126.17   1
   2  -1  21 1009.01 344.235   1
   2  -1  21 1362.00 217.048   1
  -2  -1 -21  631.99 315.171   1
  -2  -1 -21  621.48 351.783   1
   2   1  21 1134.43 210.815   1
   2   1  21 1043.56 363.124   1
  -2   1 -21  645.51 308.449   1
  -2   1 -21  727.75 367.705   1
   2  -1  22  38378. 1412.32   1
   2  -1  22  40781. 1614.34   1
  -2  -1 -22  41307. 1704.09   1
  -2  -1 -22  40293. 1742.39   1
   2   1  22  37739. 1409.31   1
   2   1  22  41382. 1694.70   1
  -2   1 -22  42771. 1676.30   1
  -2   1 -22  40706. 1707.85   1
   2  -1  23  13267. 773.187   1
   2  -1  23  12891. 613.593   1
  -2  -1 -23  13515. 877.205   1
   2   1  23  13365. 642.508   1
  -2   1 -23  13815. 797.220   1
  -2   1 -23  12937. 835.899   1
   2  -1  24 7089.74 460.758   1
   2  -1  24 5711.60 552.384   1
  -2  -1 -24 5118.28 588.809   1
  -2  -1 -24 6286.14 626.736   1
   2   1  24 6462.63 413.443   1
   2   1  24 5891.85 563.274   1
  -2   1 -24 5752.90 539.616   1
   2  -1  25 3419.45 303.905   1
   2  -1  25 3003.00 456.252   1
  -2  -1 -25 3207.66 535.486   1
  -2  -1 -25 3506.57 536.612   1
   2   1  25 3378.14 489.673   1
   2   1  25 3755.16 310.702   1
  -2   1 -25 3306.42 481.036   1
  -2   1 -25 2946.30 532.106   1
   2  -1  26  24987. 1000.75   1
  -2  -1 -26  26008. 1333.46   1
  -2  -1 -26  26346. 1367.63   1
   2   1  26  25535. 1028.54   1
   2   1  26  26065. 1231.32  -1
  -2   1 -26  26061. 1343.60   1
   2  -1  27  -80.81 365.865   1
   2  -1  27  -39.88 160.833   1
  -2  -1 -27  165.00 446.113   1
   2   1  27 -138.23 350.431   1
  -2   1 -27  353.47 380.773   1
  -2   1 -27 -152.38 396.920   1
   2  -1  28  17961. 992.113   1
   2  -1  28  16669. 746.526   1
  -2  -1 -28  15993. 1076.23   1
  -2  -1 -28  17274. 1073.60   1
   2   1  28  16309. 738.640   1
   2   1  28  17702. 1008.64   1
  -2   1 -28  16786. 1006.38   1
  -2   1 -28  15787. 1054.07   1
   2  -1  29 6252.34 413.819   1
   2  -1  29 5140.81 613.218   1
  -2  -1 -29 5182.12 715.358   1
   2   1  29 5820.50 388.659  -1
  -2   1 -29 6147.20 774.314   1
  -2   1 -29 6327.44 699.586   1
   2  -1  30 1435.22 510.702   1
  -2  -1 -30 2096.13 546.751   1
  -2  -1 -30 1522.72 578.295   1
   2   1  30 2357.49 521.967   1
   2   1  30 1939.92 242.546   1
  -2   1 -30 1328.58 509.951   1
  -2   1 -30 1664.29 657.529   1
   2  -1  31 1089.75 224.972   1
   2  -1  31  711.98 480.285   1
  -2  -1 -31  669.92 526.849   1
  -2  -1 -31  599.32 476.905   1
   2   1  31  842.28 450.995   1
   2   1  31  797.60 205.407   1
  -2   1 -31 1151.33 525.722   1
  -2   1 -31  603.83 561.396   1
   2   1  32 8978.59 795.343   1
  -2   1 -32 8588.05 919.263   1
   2  -1  33  149.19 200.826   1
   2  -1  33 -375.89 463.387   1
  -2  -1 -33 -955.31 530.229   1
   2   1  33   -2.70 165.114   1
   2   1  33  200.00 468.268   1
  -2   1 -33  460.38 541.870   1
  -2   1 -33  237.51 506.947   1
   2  -1  34 6042.05 704.844   1
  -2  -1 -34 6169.73 831.768   1
   2   1  34 7266.23 692.451   1
   2   1  34 7863.30 496.808   1
  -2   1 -34 5809.23 867.817   1
   2  -1  35 3215.17 586.180   1
  -2  -1 -35 2652.27 610.589   1
   2   1  35 2244.83 458.505   1
  -2   1 -35 1239.95 577.919   1
   2  -1  36 1947.43 412.317   1
  -2  -1 -36  804.36 489.297   1
   2  -2 -37 2978.22 583.176   1
  -2   2  37 5580.17 543.747   1
   2  -2 -36  187.98 465.640   1
  -2  -2  36 -122.76 449.493   1
  -2  -2  36 -338.94 378.520   1
  -2   2  36  240.48 357.792   1
  -2   2  36  240.74 264.513   1
   2  -2 -35 8028.53 853.923   1
  -2  -2  35 8246.33 631.242   1
  -2  -2  35 6684.18 745.024   1
   2   2 -35 7082.23 1018.02   1
  -2   2  35 8419.07 769.808  -1
   2  -2 -34 4472.40 744.273   1
  -2  -2  34 4600.07 725.121   1
  -2  -2  34 5418.70 449.868   1
   2   2 -34 3553.88 749.154   1
   2   2 -34 3875.32 814.494   1
  -2   2  34 5621.47 422.831   1
  -2   2  34 4577.54 676.680   1
   2  -2 -33  207.02 501.314   1
  -2  -2  33  356.36 554.262   1
  -2  -2  33    5.86 214.194   1
   2   2 -33  -53.59 619.977   1
   2   2 -33  344.95 556.139   1
  -2   2  33  224.56 192.752   1
  -2   2  33  149.72 470.897   1
   2  -2 -32 1306.42 631.242   1
  -2  -2  32 1226.44 267.705   1
  -2  -2  32 2135.56 592.940   1
   2   2 -32  693.95 584.678   1
   2   2 -32 1479.16 584.303   1
  -2   2  32 1918.51 502.065   1
   2  -2 -31 4014.27 671.423   1
   2  -2 -31 3316.93 731.505   1
  -2  -2  31 3882.84 339.767   1
   2   2 -31 3849.04 722.493   1
  -2   2  31 3184.00 576.042   1
  -2   2  31 4198.27 354.224   1
   2  -2 -30 -292.56 546.376  -1
   2  -2 -30  389.79 503.191   1
  -2  -2  30  146.75 179.872   1
  -2  -2  30   -1.13 425.460   1
   2   2 -30 -265.41 458.505   1
   2   2 -30  951.18 520.841   1
  -2   2  30  593.32 196.583   1
  -2   2  30  373.45 407.435   1
   2  -2 -29  13894. 1004.13   1
  -2  -2  29  15178. 939.165   1
  -2  -2  29  14502. 669.921   1
   2   2 -29  14405. 1005.63   1
   2   2 -29  14134. 1015.77   1
  -2   2  29  15223. 704.092   1
   2  -2 -28 4603.83 700.337   1
   2  -2 -28 3841.53 590.687   1
  -2  -2  28 4494.93 555.388   1
   2   2 -28 4164.47 625.234   1
   2   2 -28 4889.22 644.385   1
  -2   2  28 4885.46 593.315   1
  -2   2  28 5478.78 378.520   1
   2  -2 -27  963.20 478.407   1
  -2  -2  27  530.60 385.655   1
  -2  -2  27  565.15 202.816   1
   2   2 -27  711.60 421.704   1
   2   2 -27  671.42 432.594   1
  -2   2  27  409.69 398.422   1
   2  -2 -26  14450. 946.676   1
   2  -2 -26  11769. 948.178   1
  -2  -2  26  12385. 792.714   1
  -2  -2  26  12670. 593.315   1
   2   2 -26  12974. 857.678   1
   2   2 -26  11127. 777.318   1
  -2   2  26  13564. 892.226   1
  -2   2  26  13751. 662.410   1
   2  -2 -25  14487. 1013.14   1
   2  -2 -25  14529. 933.157   1
  -2  -2  25  13917. 626.361   1
  -2  -2  25  13714. 805.857   1
   2   2 -25  13229. 810.739   1
   2   2 -25  12550. 810.363   1
  -2   2  25  14777. 935.035   1
  -2   2  25  14183. 676.680   1
   2  -2 -24  165.15 413.443   1
   2  -2 -24  279.76 354.525   1
  -2  -2  24  311.83 313.518   1
  -2  -2  24  133.12 160.683   1
   2   2 -24 -196.32 325.197   1
   2   2 -24   58.05 312.317   1
  -2   2  24  223.96 175.066   1
  -2   2  24  349.12 394.292   1
   2  -2 -23  26241. 1287.64   1
  -2  -2  23  23579. 921.892   1
   2   2 -23  24300. 1133.68  -1
  -2   2  23  24330. 994.366   1
   2  -2 -22  11893. 847.540   1
   2  -2 -22  13860. 869.695   1
  -2  -2  22  14593. 639.128   1
  -2  -2  22  13267. 732.256   1
   2   2 -22  13293. 766.428   1
   2   2 -22  12542. 741.269   1
  -2   2  22  13725. 660.908   1
  -2   2  22  14330. 880.209   1
   2  -2 -21  502.82 331.956   1
   2  -2 -21  -76.46 361.772   1
  -2  -2  21  302.48 158.580   1
  -2  -2  21   96.66 271.536   1
   2   2 -21  218.74 289.598   1
   2   2 -21   13.23 281.111   1
   2  -2 -20  32069. 1469.39   1
  -2  -2  20  32970. 1308.67   1
  -2  -2  20  31235. 1170.48   1
   2   2 -20  33492. 1342.85   1
  -2   2  20  34059. 1484.79   1
   2  -2 -19  36523. 1606.46  -1
   2  -2 -19  35670. 1532.86   1
  -2  -2  19  33203. 1297.41   1
  -2  -2  19  35505. 1278.26   1
   2   2 -19  34270. 1340.22   1
   2   2 -19  32580. 1309.05   1
  -2   2  19  31333. 1206.91   1
  -2   2  19  35843. 1512.58   1
   2  -2 -18  276.00 324.896   1
   2  -2 -18  347.95 299.512   1
  -2  -2  18 -104.24 216.335   1
  -2  -2  18  357.53 136.725   1
   2   2 -18  205.22 231.956   1
   2   2 -18  203.60 215.696   1
  -2   2  18  455.88 176.906   1
  -2   2  18 -567.78 280.848   1
   2  -2 -17  33853. 1431.47   1
   2  -2 -17  32963. 1444.99   1
  -2  -2  17  32805. 1254.22   1
  -2  -2  17  32918. 1165.60   1
   2   2 -17  33988. 1297.78   1
   2   2 -17  31254. 1218.17   1
  -2   2  17  32291. 1375.14   1
  -2   2  17  33102. 1251.97   1
   2  -2 -16  30943. 1347.35   1
   2  -2 -16  32279. 1349.60   1
  -2  -2  16  32753. 1157.34   1
  -2  -2  16  32133. 1217.80  -1
   2   2 -16  30672. 1173.86   1
   2   2 -16  31938. 1220.80   1
  -2   2  16  31656. 1203.90   1
  -2   2  16  31893. 1346.22   1
   2  -2 -15  19992. 994.742   1
   2  -2 -15  19452. 929.026   1
  -2  -2  15  18122. 690.198   1
  -2  -2  15  17315. 741.269   1
   2   2 -15  18719. 777.318   1
   2   2 -15  19992. 836.274   1
  -2   2  15  18648. 915.883   1
  -2   2  15  17698. 757.791   1
   2  -2 -14  61923. 2242.96   1
  -2  -2  14  63800. 2089.75   1
  -2  -2  14  59820. 2030.41   1
   2   2 -14  62674. 2121.67  -1
   2   2 -14  62861. 2120.54   1
  -2   2  14  61172. 2108.15   1
   2  -2 -13 109801. 3703.34   1
  -2  -2  13 108336. 3455.50   1
   2   2 -13 108487. 3508.07   1
  -2   2  13 105295. 3468.64   1
  -2   2  13 109425. 3704.09   1
   2  -2 -12  40218. 1445.74  -1
   2  -2 -12  40180. 1535.11   1
  -2  -2  12  40293. 1393.92   1
  -2  -2  12  41570. 1384.90   1
   2   2 -12  39805. 1389.41   1
   2   2 -12  41006. 1406.31   1
  -2   2  12  39392. 1516.71   1
  -2   2  12  38565. 1392.79   1
   2  -2 -11  16849. 713.856   1
   2   2 -11  17379. 655.651   1
   2   2 -11  17769. 684.566   1
  -2   2  11  17048. 797.220   1
   2  -2 -10  71198. 2458.13   1
   2  -2 -10  68006. 2291.40   1
  -2  -2  10  68945. 2238.08   1
  -2  -2  10  72062. 2301.16   1
   2   2 -10  72212. 2325.19   1
   2   2 -10  72700. 2356.74   1
  -2   2  10  69508. 2408.56   1
  -2   2  10  69771. 2348.85   1
   2  -2  -9 6526.47 424.709   1
   2  -2  -9 5850.54 343.747   1
  -2  -2   9 5538.86 237.664   1
  -2  -2   9 5809.23 273.000   1
   2   2  -9 5313.55 237.664   1
  -2   2   9 5433.72 333.045   1
   2  -2  -8  33770. 1263.24   1
   2  -2  -8  33845. 1214.79   1
  -2  -2   8  34187. 1130.68   1
  -2   2   8  35764. 1276.38   1
  -2   2   8  34454. 1315.06   1
   2  -2  -7 316147. 9954.93   1
   2  -2  -7 313030. 9823.50   1
  -2  -2   7 311378. 9680.80   1
  -2  -2   7 318588. 9879.83   1
   2   2  -7 328276.  10188.   1
   2   2  -7 330754.  10267.   1
  -2   2   7 321742.  10086.   1
   2  -2  -6  12125. 539.992   1
  -2  -2   6  12756. 425.460   1
  -2  -2   6  11157. 390.912   1
   2   2  -6  13466. 453.623   1
  -2   2   6  11656. 564.401   1
  -2   2   6  12155. 522.343   1
   2  -2  -5  51108. 1739.01   1
  -2  -2   5  50094. 1582.42   1
  -2  -2   5  47052. 1484.79   1
   2   2  -5  47465. 1494.93   1
   2   2  -5  51671. 1625.23   1
  -2   2   5  51671. 1775.44   1
  -2   2   5  52798. 1767.18   1
   2  -2  -4 808110.  25066.   1
   2  -2  -4 789335.  24491.   1
  -2  -2   4 839278.  25963.   1
  -2  -2   4 738640.  22839.   1
   2   2  -4 821253.  25400.   1
   2   2  -4 842658.  26057.   1
  -2   2   4 836274.  25914.   1
  -2   2   4 806984.  25039.   1
   2  -2  -3 225422. 7085.99   1
  -2  -2   3 234134. 7285.01   1
  -2  -2   3 218625. 6785.57  -1
   2   2  -3 211340. 6564.02   1
  -2   2   3 221630. 6950.80   1
   2  -2  -2 120803. 3845.28   1
   2  -2  -2 119226. 3788.96   1
  -2  -2   2 122343. 3830.26   1
   2   2  -2 121104. 3796.47   1
  -2   2   2 118701. 3762.67   1
  -2   2   2 123094. 3924.14   1
   2  -2  -1 544123.  16868.   1
   2  -2  -1 545249.  16913.   1
  -2  -2   1 552760.  17135.   1
  -2  -2   1 563650.  17454.   1
   2   2  -1 551257.  17075.   1
   2   2  -1 561396.  17386.   1
  -2   2   1 545249.  16925.   1
  -2   2   1 541118.  16778.   1
   2  -2   0  59895. 1932.41   1
   2  -2   0  57304. 1857.30   1
  -2  -2   0  59895. 1937.66   1
  -2  -2   0  62486. 2037.17   1
   2   2   0  63350. 2054.45   1
   2   2   0  56290. 1831.77   1
  -2   2   0  59219. 1922.64   1
  -2   2   0  62223. 1996.24   1
   2  -2   1 1438.98 130.154   1
   2  -2   1 1918.14 133.684   1
  -2  -2  -1 1439.35 147.503   1
  -2  -2  -1 1713.85 175.479   1
   2   2   1 1214.42 144.386   1
   2   2   1 1497.93 163.612   1
  -2   2  -1 1613.22 137.138  -1
   2  -2   2  48592. 1567.78   1
   2  -2   2  49380. 1588.81   1
  -2  -2  -2  48554. 1645.51   1
   2   2   2  50131. 1679.68   1
  -2   2  -2  52422. 1677.05  -1
  -2   2  -2  50282. 1629.74   1
   2  -2   3  69621. 2205.41   1
   2  -2   3  66654. 2116.78   1
  -2  -2  -3  71573. 2369.13   1
  -2  -2  -3  72662. 2378.89  -1
   2   2   3  72024. 2366.88   1
   2   2   3  74765. 2463.01   1
  -2   2  -3  70672. 2253.85   1
  -2   2  -3  73488. 2329.33   1
   2  -2   4 5779.19 242.170   1
   2  -2   4 5456.25 240.180   1
  -2  -2  -4 6008.26 341.945   1
  -2  -2  -4 5816.74 344.123   1
   2   2   4 5647.76 340.330   1
   2   2   4 5501.31 328.689   1
  -2   2  -4 5448.74 248.254   1
   2  -2   5 175366. 5475.02   1
   2  -2   5 187833. 5865.56   1
  -2  -2  -5 180661. 5767.93   1
   2   2   5 185618. 5903.11   1
   2   2   5 187570. 5985.72   1
  -2   2  -5 189786. 5929.40   1
  -2   2  -5 174352. 5444.98   1
   2  -2   6  12741. 478.783   1
   2  -2   6  12610. 473.901  -1
  -2  -2  -6  14044. 648.516   1
  -2  -2  -6  13357. 615.095   1
   2   2   6  14172. 662.410   1
   2   2   6  13785. 634.246   1
  -2   2  -6  12647. 492.677   1
   2  -2   7  651.52 123.883   1
   2  -2   7 1004.13 135.486   1
  -2  -2  -7  742.40 202.741   1
  -2  -2  -7  773.56 197.859   1
   2   2   7 -117.54 395.043   1
   2   2   7  300.60 189.035   1
  -2   2  -7  630.49 120.315   1
   2  -2   8  59069. 1930.90   1
   2  -2   8  54600. 1807.73   1
  -2  -2  -8  51446. 1810.36   1
  -2  -2  -8  52460. 1874.58   1
   2   2   8  52647. 1874.95   1
   2   2   8  54337. 1940.29   1
   2  -2   9 171949. 5441.23   1
  -2  -2  -9 165415. 5343.59   1
   2   2   9 168682. 5463.76   1
  -2   2  -9 169245. 5373.63   1
   2  -2  10 9609.45 436.350   1
   2  -2  10 9387.90 452.121   1
  -2  -2 -10 8535.48 530.980   1
  -2  -2 -10 9601.94 548.253   1
   2   2  10 9076.22 535.110   1
   2   2  10 9988.72 594.817   1
  -2   2 -10 9151.32 408.561   1
  -2   2 -10 9455.49 462.260   1
  -2  -2 -11  65452. 2333.83   1
  -2  -2 -11  72475. 2512.58   1
   2   2  11  72700. 2564.02   1
   2   2  11  66203. 2329.33   1
  -2   2 -11  69546. 2277.50   1
  -2   2 -11  67180. 2260.98   1
   2  -2  12  95606. 3114.53   1
   2  -2  12  91626. 3039.05   1
  -2  -2 -12  90499. 3085.99   1
  -2  -2 -12  91964. 3171.98   1
   2   2  12  92903. 3164.85   1
   2   2  12  88209. 3066.09   1
  -2   2 -12  92001. 2985.35   1
  -2   2 -12  90236. 2989.48   1
   2  -2  13  515.58 218.137   1
   2  -2  13  101.05 237.251   1
  -2  -2 -13  305.59 224.483   1
   2   2  13  283.97 275.141   1
  -2   2 -13  184.04 169.583   1
  -2   2 -13  442.36 205.295   1
   2  -2  14  57792. 1977.09   1
   2  -2  14  52798. 1898.98   1
  -2  -2 -14  53999. 2034.55   1
  -2  -2 -14  52535. 1963.57   1
   2   2  14  54450. 2010.51   1
  -2   2 -14  53774. 1834.40   1
  -2   2 -14  56816. 2006.38   1
   2  -2  15 170484. 5460.00   1
   2  -2  15 168194. 5482.53   1
  -2  -2 -15 165903. 5501.31   1
  -2  -2 -15 168494. 5553.88   1
   2   2  15 161096. 5200.90   1
   2   2  15 164551. 5426.21   1
  -2   2 -15 169395. 5505.06   1
  -2   2 -15 166091. 5313.55   1
   2  -2  16  20706. 864.438   1
  -2  -2 -16  19752. 964.701   1
  -2  -2 -16  22306. 1078.11   1
   2   2  16  21551. 1015.02   1
   2   2  16  21780. 899.361   1
  -2   2 -16  20203. 926.398   1
  -2   2 -16  20668. 848.291   1
   2  -2  17  13849. 666.916   1
  -2  -2 -17  14195. 837.401   1
   2   2  17  14285. 784.077   1
  -2   2 -17  15576. 707.848   1
   2  -2  18  44086. 1614.34  -1
   2  -2  18  42020. 1494.55   1
  -2  -2 -18  43447. 1813.74   1
  -2  -2 -18  44273. 1772.81   1
   2   2  18  42095. 1675.18   1
   2   2  18  42020. 1547.50   1
  -2   2 -18  44161. 1607.58   1
  -2   2 -18  43597. 1692.83   1
   2  -2  19  12339. 572.286  -1
   2  -2  19  11438. 624.859   1
  -2  -2 -19  10060. 701.464   1
  -2  -2 -19  11423. 785.955   1
   2   2  19  10976. 714.607   1
   2   2  19  11667. 601.577   1
  -2   2 -19  10563. 580.548   1
  -2   2 -19  10398. 671.047   1
   2  -2  20  21893. 870.822   1
  -2  -2 -20  21359. 1123.17   1
  -2  -2 -20  21243. 1088.25   1
   2   2  20  20725. 884.716   1
   2   2  20  20499. 1030.79   1
  -2   2 -20  22234. 1064.59   1
   2  -2  21  80285. 2772.81   1
   2  -2  21  80586. 2692.82   1
  -2  -2 -21  79609. 2958.69   1
  -2   2 -21  79684. 2870.82   1
  -2   2 -21  82914. 2862.18   1
   2  -2  22 8317.68 579.046   1
   2  -2  22 8302.66 451.746   1
  -2  -2 -22 7281.25 630.116   1
  -2  -2 -22 8569.27 690.198   1
   2   2  22 8719.48 678.933   1
   2   2  22 8137.43 471.648   1
  -2   2 -22 7044.68 596.319   1
  -2   2 -22 7870.81 560.645   1
   2  -2  23 2049.57 235.298   1
   2  -2  23 1986.48 396.169   1
  -2  -2 -23 3280.88 505.820   1
  -2  -2 -23 2698.83 464.889   1
   2   2  23 2451.37 430.717   1
   2   2  23 1516.33 227.262   1
  -2   2 -23 1665.04 429.590   1
  -2   2 -23 2245.96 380.773   1
   2  -2  24  14604. 654.524   1
   2  -2  24  14529. 799.098   1
  -2  -2 -24  14747. 915.132   1
  -2  -2 -24  14735. 946.676   1
   2   2  24  13819. 656.026   1
   2   2  24  14213. 866.315   1
  -2   2 -24  13282. 759.293   1
  -2   2 -24  13883. 892.977   1
   2  -2  25 7803.22 604.205  -1
   2  -2  25 7671.79 441.231   1
  -2  -2 -25 6954.56 702.215   1
  -2  -2 -25 7427.71 706.346   1
   2   2  25 6886.96 622.981   1
   2   2  25 7544.12 458.129   1
  -2   2 -25 6184.75 654.149  -1
  -2   2 -25 7247.46 575.290   1
   2  -2  26  811.87 201.690   1
   2  -2  26  872.70 402.178   1
  -2  -2 -26  462.64 412.692   1
  -2  -2 -26  761.92 428.839   1
   2   2  26  790.09 189.223   1
   2   2  26 1289.52 410.439   1
  -2   2 -26  820.50 390.161   1
   2  -2  27  25362. 1202.40   1
   2  -2  27  25573. 1013.14   1
  -2  -2 -27  26485. 1384.53   1
  -2  -2 -27  24863. 1362.37  -1
   2   2  27  23800. 1202.78   1
   2   2  27  23301. 950.806   1
   2  -2  28  10244. 542.245  -1
  -2  -2 -28 9320.31 840.780   1
  -2  -2 -28  11367. 911.753   1
   2   2  28 9451.74 505.069   1
   2   2  28 9827.25 729.252   1
  -2   2 -28 9868.56 886.969   1
   2  -2  29  -58.05 173.977   1
   2  -2  29   -6.15 440.480   1
  -2  -2 -29 -127.64 446.488   1
  -2  -2 -29 -517.46 459.256   1
   2   2  29  280.81 347.352   1
   2   2  29   12.79 137.627   1
  -2   2 -29  -10.68 410.439   1
  -2   2 -29 -314.34 471.648   1
   2  -2  30 1729.25 529.478   1
   2  -2  30 2443.11 277.394   1
  -2  -2 -30 2238.08 571.535   1
  -2  -2 -30 1460.38 563.649   1
   2   2  30 2297.03 258.993   1
   2   2  30 2126.17 451.370   1
  -2   2 -30 1088.25 504.318   1
  -2   2 -30 1538.49 592.189   1
   2  -2  31 5043.18 666.165   1
   2  -2  31 5989.48 417.574  -1
  -2  -2 -31 5426.21 708.974   1
   2   2  31 5422.45 378.145   1
   2   2  31 4810.36 592.564   1
  -2   2 -31 5674.05 839.278   1
  -2   2 -31 3894.10 641.006   1
   2  -2  32   34.30 499.061   1
  -2  -2 -32  335.00 469.019   1
   2   2  32  303.23 512.955   1
   2   2  32  437.10 179.835   1
  -2   2 -32   33.69 441.231   1
   2  -2  33 6357.49 474.277   1
   2  -2  33 6199.77 736.762   1
  -2  -2 -33 5298.53 778.820   1
   2   2  33 6154.71 692.076   1
  -2   2 -33 5505.06 879.834   1
  -2   2 -33 4003.00 737.138   1
   2  -2  34 1479.91 300.788   1
   2   2  34 1444.99 439.354   1
  -2   2 -34 1226.81 671.423   1
   2  -2  35  408.94 474.277   1
   2  -2  35  197.22 332.782   1
  -2  -2 -35  106.87 472.775   1
   2   2  35   64.78 261.772   1
  -2  -2 -36 2435.22 526.098   1
   2   2  36 4844.16 508.073   1
   2  -3 -36  893.73 499.061   1
  -2   3  36 1104.02 301.690   1
   2  -3 -35 1561.02 522.343   1
  -2   3  35 2005.63 299.098   1
  -2   3  35 1038.30 486.293   1
   2  -3 -34 -362.64 488.546   1
  -2  -3  34  153.32 271.160   1
   2   3 -34 -276.76 627.112   1
  -2   3  34 -536.99 419.076   1
  -2   3  34  214.16 201.615   1
   2  -3 -33 8084.86 855.425   1
  -2  -3  33 8283.88 513.706   1
  -2  -3  33 7194.89 812.241   1
   2   3 -33 6488.92 809.988   1
   2   3 -33 7277.50 973.337   1
  -2   3  33 9207.65 516.334   1
  -2   3  33 8013.51 776.567   1
   2  -3 -32  485.92 472.024   1
  -2  -3  32  560.27 503.191   1
  -2  -3  32  339.99 232.895   1
   2   3 -32  224.90 493.052   1
   2   3 -32  233.23 636.875   1
  -2   3  32  273.90 180.661   1
   2  -3 -31 5512.57 743.522   1
  -2  -3  31 6132.18 678.557   1
   2   3 -31 4483.66 699.962   1
   2   3 -31 4431.09 762.297   1
  -2   3  31 6380.02 679.684   1
   2  -3 -30  454.75 482.538   1
   2  -3 -30   19.47 512.204   1
  -2  -3  30 -165.79 425.835   1
  -2  -3  30  -49.16 183.477   1
   2   3 -30  183.40 550.131   1
   2   3 -30 -198.20 451.370   1
  -2   3  30  200.04 420.578   1
  -2   3  30   10.70 166.504   1
   2  -3 -29 2052.19 547.127   1
   2  -3 -29 1689.45 587.682   1
  -2  -3  29 1364.25 231.205   1
  -2  -3  29 1324.07 460.007   1
   2   3 -29 1429.96 577.168   1
   2   3 -29 2016.15 525.722   1
  -2   3  29 1441.61 235.148  -1
  -2   3  29 1895.60 461.885   1
   2  -3 -28  787.83 429.966   1
   2  -3 -28  493.43 496.432   1
  -2  -3  28  114.95 180.210   1
  -2  -3  28  480.66 393.916   1
   2   3 -28  157.15 410.814   1
   2   3 -28  323.77 442.733   1
  -2   3  28 -209.84 151.108   1
  -2   3  28  136.84 400.676   1
   2  -3 -27  34089. 1760.04   1
   2  -3 -27  36391. 1686.82   1
   2   3 -27  39166. 1685.32   1
   2   3 -27  38002. 1588.81   1
  -2   3  27  36703. 1695.45   1
  -2   3  27  36245. 1362.37   1
   2  -3 -26  372.29 474.277   1
   2  -3 -26  -86.37 377.394   1
  -2  -3  26   15.43 165.828   1
   2   3 -26    6.47 380.398   1
  -2   3  26 -231.54 393.165   1
  -2   3  26 -109.80 156.140   1
   2  -3 -25 5640.25 686.068   1
   2  -3 -25 6398.79 769.808   1
  -2  -3  25 6263.61 549.755   1
  -2  -3  25 7232.44 401.427   1
   2   3 -25 6485.16 597.070   1
   2   3 -25 5737.88 527.224   1
  -2   3  25 6984.60 663.912   1
  -2   3  25 6980.84 473.901   1
   2  -3 -24 2722.12 498.685  -1
   2  -3 -24 1544.12 515.208   1
  -2  -3  24  805.48 327.450   1
  -2  -3  24 1664.66 226.737   1
   2   3 -24  790.46 349.831   1
   2   3 -24 1222.68 346.038   1
  -2   3  24 1979.34 470.897   1
   2  -3 -23 9917.38 761.546   1
   2  -3 -23 9740.88 809.988   1
  -2  -3  23 8509.19 550.131   1
  -2  -3  23  10717. 499.061   1
   2   3 -23 9808.48 679.308   1
   2   3 -23 9917.38 624.108   1
   2  -3 -22 1099.51 446.488   1
   2  -3 -22 1375.52 407.059   1
  -2  -3  22 1532.48 325.535   1
   2   3 -22 1272.25 327.074   1
  -2   3  22 1728.50 434.472   1
  -2   3  22 1190.39 217.386   1
   2  -3 -21 109238. 3867.81   1
  -2  -3  21 112880. 3633.12   1
  -2  -3  21 109838. 3636.87   1
   2   3 -21 114345. 3822.75   1
   2   3 -21 120916. 3995.49   1
  -2   3  21 108599. 3608.33   1
   2  -3 -20  271.80 352.272   1
   2  -3 -20   69.70 312.016   1
  -2  -3  20   83.85 219.489   1
  -2  -3  20   68.23 138.490   1
   2   3 -20  202.33 218.625   1
   2   3 -20   40.33 241.532   1
  -2   3  20  270.48 178.445   1
  -2   3  20   31.57 325.948   1
   2  -3 -19 1874.58 381.524   1
   2  -3 -19 1932.78 441.607   1
  -2  -3  19 2493.43 217.349   1
  -2  -3  19 2171.98 297.221   1
   2   3 -19 1845.66 293.804   1
   2   3 -19 2161.85 272.512   1
  -2   3  19 2468.64 437.852   1
  -2   3  19 2058.95 271.573   1
   2  -3 -18  16541. 972.962  -1
  -2  -3  18  16339. 630.491   1
  -2  -3  18  15531. 684.941  -1
   2   3 -18  15223. 663.537   1
   2   3 -18  15636. 695.080   1
  -2   3  18  15715. 888.846   1
   2  -3 -17  23646. 1135.18   1
   2  -3 -17  26027. 1247.84   1
  -2  -3  17  23053. 896.732   1
  -2  -3  17  23124. 829.515   1
   2   3 -17  24119. 932.782   1
   2   3 -17  23905. 912.879   1
  -2   3  17  22711. 941.419  -1
  -2   3  17  23902. 1131.81   1
   2  -3 -16 1708.97 357.153   1
   2  -3 -16 2519.71 431.843   1
  -2  -3  16 2479.91 182.351   1
   2   3 -16 2247.84 241.119   1
  -2   3  16 2745.77 412.692   1
  -2   3  16 2826.51 290.311   1
   2  -3 -15 139730. 4739.01   1
   2  -3 -15 145287. 4866.69   1
  -2  -3  15 144649. 4558.76   1
   2   3 -15 141494. 4509.95   1
   2   3 -15 149718. 4765.30   1
  -2   3  15 145212. 4866.69   1
  -2   3  15 138415. 4513.70   1
   2  -3 -14  13522. 744.648  -1
  -2  -3  14  13616. 546.376   1
  -2  -3  14  14885. 542.245   1
   2   3 -14  12884. 526.473   1
  -2   3  14  14146. 653.398   1
  -2   3  14  13034. 733.007   1
   2  -3 -13   67.03 233.759   1
  -2  -3  13   40.18 123.733   1
  -2  -3  13  115.02  82.013   1
   2   3 -13  -33.36 119.377   1
   2   3 -13   -6.74 123.920   1
  -2   3  13 -164.36 223.732   1
  -2   3  13  300.75 160.533   1
   2  -3 -12  29392. 1226.81   1
  -2  -3  12  30274. 1021.03   1
   2   3 -12  28577. 964.325   1
  -2   3  12  29106. 1118.66   1
   2  -3 -11  94705. 3140.06   1
   2  -3 -11 101464. 3438.60   1
  -2  -3  11  97634. 3084.86   1
   2   3 -11 100751. 3177.99   1
   2   3 -11  97071. 3062.33   1
  -2   3  11 100300. 3440.85   1
  -2   3  11  95156. 3151.33   1
   2  -3 -10 1562.52 211.866   1
   2  -3 -10 1335.33 259.594   1
  -2  -3  10 1742.02  89.335   1
  -2  -3  10 1458.88 106.158   1
   2   3 -10 1524.97 103.905   1
   2   3 -10 1250.47  97.296   1
  -2   3  10 1442.36 205.708   1
  -2   3  10 1463.76 256.628   1
   2  -3  -9 109313. 3609.46   1
   2  -3  -9 112129. 3762.67   1
  -2   3   9 113256. 3830.26   1
  -2   3   9 108186. 3552.76   1
  -2   3   8  10905. 595.944   1
   2  -3  -7 3303.41 272.549   1
   2  -3  -7 4081.86 336.800   1
  -2   3   7 4483.66 366.766   1
  -2   3   7 3580.54 271.235   1
   2  -3  -6  335.34 175.141   1
   2  -3  -6   27.16 111.566   1
   2   3  -6  335.15  62.073   1
   2   3  -6  279.05  38.040   1
  -2   3   6  221.14 130.942   1
  -2   3   6  316.82 175.066   1
   2  -3  -5 373413.  11682.   1
   2  -3  -5 383026.  12024.   1
  -2  -3   5 387532.  12043.   1
  -2  -3   5 356252.  11055.   1
  -2   3   5 379271.  11866.   1
  -2   3   5 395418.  12422.   1
   2  -3  -4  10353. 503.191   1
  -2  -3   4  10000. 359.744   1
   2   3  -4  13143. 461.509   1
  -2   3   4  12538. 535.486   1
   2  -3  -3  55614. 1863.31   1
   2  -3  -3  57829. 1953.43   1
  -2  -3   3  55314. 1773.94   1
  -2  -3   3  56327. 1829.51   1
   2   3  -3  56590. 1822.00   1
   2   3  -3  55689. 1805.86   1
  -2   3   3  57229. 1907.62   1
  -2   3   3  57980. 1974.46   1
   2  -3  -2 5978.21 313.105   1
   2  -3  -2 4926.77 297.822   1
  -2  -3   2 5351.10 273.901   1
   2   3  -2 6060.83 290.387   1
  -2   3   2 6087.11 309.763   1
  -2   3   2 5313.55 321.479   1
   2  -3  -1  40030. 1365.00   1
   2  -3  -1  39730. 1365.00   1
  -2  -3   1  37927. 1276.00   1
  -2  -3   1  38979. 1333.08   1
   2   3  -1  40293. 1365.38   1
   2   3  -1  37552. 1279.01   1
  -2   3   1  40368. 1362.75   1
  -2   3   1  39880. 1387.53   1
   2  -3   0  24142. 868.568   1
  -2  -3   0  24397. 902.365   1
   2  -3   1 469019.  14566.   1
   2  -3   1 460007.  14296.   1
  -2  -3  -1 476905.  14870.   1
  -2  -3  -1 469395.  14615.   1
   2   3   1 482538.  15043.   1
   2   3   1 470522.  14664.   1
  -2   3  -1 472024.  14675.   1
  -2   3  -1 468268.  14532.   1
   2  -3   2 4141.94 229.778  -1
  -2  -3  -2 3924.14 274.202   1
   2   3   2 5227.18 329.703   1
  -2   3  -2 5005.63 234.735   1
  -2   3  -2 4506.19 252.197   1
   2  -3   3 117687. 3713.10   1
   2  -3   3 122343. 3856.55   1
  -2  -3  -3 127488. 4134.43   1
  -2  -3  -3 129328. 4164.47   1
   2   3   3 128276. 4153.21   1
   2   3   3 130154. 4209.53   1
  -2   3  -3 124671. 3912.88   1
  -2   3  -3 129102. 4085.61   1
   2  -3   4  15539. 552.760   1
  -2  -3  -4  16267. 714.231   1
   2   3   4  17037. 734.885   1
  -2   3  -4  17011. 595.568   1
   2  -3   5  56065. 1796.47   1
  -2  -3  -5  53473. 1857.30   1
  -2  -3  -5  56327. 1979.34   1
   2   3   5  55727. 1951.56   1
   2   3   5  53211. 1879.46   1
   2  -3   6  38115. 1240.33  -1
   2  -3   6  34194. 1130.30   1
  -2  -3  -6  35088. 1339.09   1
  -2  -3  -6  33274. 1253.47   1
   2   3   6  38528. 1430.72   1
  -2   3  -6  35332. 1180.62   1
  -2   3  -6  38716. 1277.51  -1
   2  -3   7 281337. 8749.52   1
   2  -3   7 278257. 8670.66   1
  -2  -3  -7 272437. 8674.42   1
   2   3   7 276192. 8783.32   1
  -2   3  -7 279121. 8704.46   1
  -2   3  -7 257266. 8021.02   1
   2  -3   8 3498.31 202.478   1
   2  -3   8 3283.89 221.630   1
  -2  -3  -8 2657.15 306.459   1
   2   3   8 3301.54 360.833   1
   2   3   8 2997.74 336.350   1
  -2   3  -8 3165.22 209.575   1
  -2   3  -8 3093.88 220.954   1
   2  -3   9  15039. 588.809   1
  -2  -3  -9  13286. 693.953   1
  -2  -3  -9  15697. 776.943   1
   2   3   9  13090. 710.476   1
  -2   3  -9  12433. 485.167   1
  -2   3  -9  13395. 544.874   1
   2  -3  10 8723.24 410.063   1
  -2  -3 -10  10608. 617.348   1
  -2  -3 -10 9831.01 592.940   1
   2   3  10  -48.10  21006.   1
   2   3  10 7630.48 546.376   1
   2  -3  11  29512. 1065.34   1
  -2  -3 -11  29332. 1227.56   1
  -2   3 -11  32779. 1172.74   1
   2  -3  12 6556.51 393.916   1
  -2  -3 -12 6680.43 525.347   1
  -2  -3 -12 6736.76 517.086   1
   2   3  12 7810.73 549.380   1
   2   3  12 8869.69 484.791   1
  -2   3 -12 7626.73 420.202   1
   2  -3  13 257566. 8152.45   1
   2  -3  13 255464. 8013.51   1
  -2  -3 -13 244010. 7897.10   1
  -2  -3 -13 249418. 8088.61   1
   2   3  13 252722. 8148.70   1
   2   3  13 241156. 7675.55   1
  -2   3 -13 248366. 7788.20   1
  -2   3 -13 254074. 8039.80   1
   2  -3  14 4438.60 370.296  -1
   2  -3  14 4712.73 322.756   1
  -2  -3 -14 4337.21 437.476   1
  -2  -3 -14 4175.74 453.623   1
   2   3  14 4678.93 461.885   1
   2   3  14 4761.54 357.116   1
  -2   3 -14 4194.51 284.979   1
  -2   3 -14 4600.07 352.384   1
   2  -3  15 6128.42 464.889   1
  -2  -3 -15 5752.90 505.069   1
  -2  -3 -15 5279.75 508.824   1
   2   3  15 4536.23 453.623   1
  -2   3 -15 5043.18 332.820   1
  -2   3 -15 4258.35 362.486   1
   2  -3  16 1394.67 341.006   1
  -2  -3 -16 2907.62 432.594   1
  -2  -3 -16 1666.16 344.048   1
   2   3  16 2911.75 411.941   1
   2   3  16 3087.12 301.765   1
  -2   3 -16 2263.99 265.302   1
  -2   3 -16 2962.07 334.998   1
   2  -3  17  35903. 1496.06   1
   2  -3  17  31799. 1171.61   1
  -2  -3 -17  34424. 1475.78   1
   2   3  17  30672. 1334.96   1
  -2   3 -17  30774. 1238.45   1
  -2   3 -17  33695. 1224.93   1
   2  -3  18   78.41 135.636   1
   2  -3  18 -299.59 224.897   1
  -2  -3 -18 -228.46 290.349   1
  -2  -3 -18    4.54 309.162   1
   2   3  18 -286.59 270.409   1
   2   3  18    5.79 173.150   1
  -2   3 -18   10.98 203.717   1
  -2   3 -18   54.34 239.091   1
   2  -3  19  86632. 2884.71   1
  -2  -3 -19  95306. 3430.34   1
  -2  -3 -19  90049. 3274.50   1
   2   3  19  89072. 3185.13   1
   2   3  19  87796. 2970.71   1
  -2   3 -19  91739. 3043.56   1
   2  -3  20 7405.17 392.790   1
   2  -3  20 6271.12 452.121   1
  -2  -3 -20 6642.88 635.373   1
  -2  -3 -20 7690.57 660.908   1
   2   3  20 7694.32 610.965   1
   2   3  20 7690.57 460.758   1
  -2   3 -20 7273.74 558.017   1
  -2   3 -20 6676.67 452.497   1
   2  -3  21  -14.16 136.613   1
   2  -3  21   67.86 254.600   1
  -2  -3 -21 -100.00 362.598   1
  -2  -3 -21  268.76 352.497   1
   2   3  21   81.22 158.355   1
   2   3  21 -112.84 321.329   1
  -2   3 -21  216.79 241.494   1
  -2   3 -21   43.07 294.930   1
   2  -3  22 2397.29 235.599   1
  -2  -3 -22 1820.50 434.848   1
  -2  -3 -22 2342.84 481.411   1
   2   3  22 1446.49 412.317   1
   2   3  22 2430.72 274.953   1
  -2   3 -22 2100.64 405.933   1
   2  -3  23  38866. 1483.66   1
   2  -3  23  40819. 1451.74   1
  -2  -3 -23  41044. 1779.19   1
  -2  -3 -23  39317. 1761.55   1
  -2   3 -23  40856. 1557.64   1
  -2   3 -23  40293. 1674.80   1
   2  -3  24 1433.34 203.004   1
   2  -3  24 1613.59 371.498   1
  -2  -3 -24 1601.95 455.125   1
   2   3  24 1213.67 413.068   1
  -2   3 -24 1541.87 352.985   1
  -2   3 -24 1712.35 421.704   1
   2  -3  25  20244. 822.380   1
   2  -3  25  20988. 977.844   1
  -2  -3 -25  21296. 1177.24   1
  -2  -3 -25  22189. 1220.05   1
   2   3  25  19636. 835.899   1
   2   3  25  22185. 1138.94   1
  -2   3 -25  20841. 1174.99   1
  -2   3 -25  21198. 1035.30   1
   2  -3  26  770.18 194.142   1
   2  -3  26  659.03 378.145   1
  -2  -3 -26  973.71 417.574   1
   2   3  26  677.06 185.467   1
  -2   3 -26 1184.38 453.999   1
  -2   3 -26 1054.82 371.010   1
   2  -3  27 -423.58 369.545   1
   2  -3  27  -52.76 147.240   1
  -2  -3 -27   91.44 418.700   1
  -2  -3 -27  132.71 411.566   1
   2   3  27  -16.68 374.239   1
   2   3  27  -96.85 143.447   1
  -2   3 -27  490.42 379.271  -1
  -2   3 -27  579.05 434.096   1
   2  -3  28 -237.29 395.794   1
  -2  -3 -28  430.34 464.138  -1
  -2  -3 -28  136.95 432.594   1
   2   3  28 -147.31 372.174   1
   2   3  28  471.27 165.753   1
  -2   3 -28  163.50 404.431   1
   2  -3  29  26294. 1033.80   1
   2  -3  29  30593. 1368.00   1
  -2  -3 -29  28013. 1484.04   1
   2   3  29  26714. 1311.68   1
  -2   3 -29  25843. 1297.78   1
  -2   3 -29  28434. 1569.28   1
   2  -3  30 -582.80 414.945   1
   2  -3  30  -17.73 172.587   1
  -2  -3 -30   28.32 455.501   1
   2   3  30   79.68 139.992   1
   2   3  30  484.04 374.465   1
  -2   3 -30   32.98 472.024  -1
  -2   3 -30  -24.87 549.380   1
   2  -3  31 4784.07 641.006   1
   2  -3  31 5411.19 404.055   1
  -2  -3 -31 5155.83 698.460   1
   2   3  31 5565.15 379.647   1
   2   3  31 5148.32 599.699   1
  -2   3 -31 4329.70 788.208   1
   2  -3  32  552.38 499.061  -1
   2  -3  32   -4.19 201.802   1
  -2  -3 -32 -693.58 455.125   1
   2   3  32  211.42 366.391   1
   2   3  32  166.69 154.262   1
  -2   3 -32  180.59 552.760   1
  -2   3 -32 -169.21 656.026   1
   2  -3  33  262.86 512.955   1
   2  -3  33  211.27 233.984   1
  -2  -3 -33  -34.70 464.513   1
   2   3  33  180.17 170.071   1
   2   3  33  393.92 441.231   1
  -2   3 -33  416.07 654.149   1
  -2   3 -33  304.28 595.568   1
   2  -3  34  357.15 530.980   1
   2  -3  34  -65.26 261.960   1
  -2  -3 -34  -92.38 434.472   1
   2   3  34 -111.94 186.932   1
  -2  -3 -35 9369.12 842.658   1
   2   3  35  24979. 1155.84   1
   2  -4 -35 6447.61 768.681   1
  -2   4  35  12809. 742.395   1
   2  -4 -34  -48.85 429.590   1
  -2   4  34  -74.58 176.680   1
   2  -4 -33 -553.89 464.513   1
  -2  -4  33  260.61 295.982   1
  -2  -4  33 1020.28 624.108   1
  -2   4  33  526.47 435.974   1
  -2   4  33  -31.42 177.093  -1
   2  -4 -32 -179.57 458.129   1
  -2  -4  32 1133.31 572.286   1
  -2  -4  32 1131.81 277.544   1
   2   4 -32  399.92 649.643   1
   2   4 -32  525.72 604.205   1
  -2   4  32  753.66 426.211   1
  -2   4  32  735.26 207.735   1
   2  -4 -31 5756.66 746.526   1
  -2  -4  31 5478.78 712.729   1
  -2  -4  31 5647.76 379.271   1
  -2   4  31 6214.79 718.362   1
  -2   4  31 5925.64 398.047   1
   2  -4 -30 1263.24 500.187   1
  -2  -4  30 1710.85 245.437   1
   2   4 -30  841.16 511.453  -1
   2   4 -30 1198.27 599.323   1
  -2   4  30  598.20 427.713   1
  -2   4  30 1204.28 224.296   1
   2  -4 -29  15336. 1214.04   1
  -2  -4  29  15340. 855.425  -1
  -2  -4  29  16061. 658.280   1
   2   4 -29  15595. 938.039   1
   2   4 -29  18382. 1078.48   1
  -2   4  29  15580. 971.835   1
   2  -4 -28 3980.47 705.970   1
   2  -4 -28 4923.01 647.014   1
  -2  -4  28 4190.76 521.216   1
  -2  -4  28 4588.81 312.504   1
   2   4 -28 4314.68 565.527   1
   2   4 -28 5414.94 668.794   1
  -2   4  28 5587.68 631.618   1
  -2   4  28 4633.87 352.872  -1
   2  -4 -27  270.67 492.677   1
   2  -4 -27  610.59 406.308   1
  -2  -4  27  406.31 361.622   1
   2   4 -27  896.36 408.937   1
  -2   4  27  421.33 179.797   1
  -2   4  27  450.62 403.304   1
   2  -4 -26  832.14 517.086   1
   2  -4 -26 1941.79 485.167   1
  -2  -4  26 1629.36 363.725   1
   2   4 -26 1224.93 422.455   1
   2   4 -26 1673.30 392.039   1
  -2   4  26 1481.03 235.148   1
  -2   4  26  809.24 446.488   1
   2  -4 -25  15569. 992.864   1
   2  -4 -25  14833. 1083.36  -1
   2   4 -25  13609. 716.109   1
   2   4 -25  15445. 817.123   1
  -2   4  25  14029. 687.194   1
   2  -4 -24  733.76 477.281   1
   2  -4 -24  125.72 399.173   1
  -2  -4  24  391.66 280.773   1
  -2  -4  24  293.32 146.489   1
   2   4 -24  414.19 314.645   1
   2   4 -24  381.52 297.822   1
  -2   4  24  321.18 177.882   1
  -2   4  24 -132.26 372.962   1
  -2  -4  23  36936. 1368.00   1
  -2  -4  23  33691. 1159.97   1
   2   4 -23  35276. 1355.24   1
   2   4 -23  36098. 1338.71   1
  -2   4  23  34991. 1339.47  -1
  -2   4  23  35783. 1611.71   1
   2  -4 -22  11866. 901.614   1
   2  -4 -22  12715. 873.826   1
  -2  -4  22  10349. 552.760   1
  -2  -4  22  10428. 435.974   1
   2   4 -22  11235. 606.458   1
   2   4 -22  11817. 579.046   1
  -2   4  22  11389. 805.106   1
  -2   4  22  10484. 564.025   1
   2  -4 -21 -278.37 300.638   1
   2  -4 -21   58.17 403.304   1
  -2  -4  21    7.53 122.080   1
  -2  -4  21  -34.16 246.001   1
   2   4 -21 -140.07 220.954   1
   2   4 -21  458.13 257.266   1
  -2   4  21  200.00 323.657   1
  -2   4  21  125.23 167.180   1
   2  -4 -20 3668.79 485.918   1
   2  -4 -20 2857.30 529.102   1
  -2  -4  20 3308.30 207.923   1
  -2  -4  20 3323.32 335.148   1
   2   4 -20 3093.88 314.757   1
  -2   4  20 2996.99 303.154   1
  -2   4  20 3707.84 520.465  -1
   2  -4 -19  58318. 2283.89   1
  -2  -4  19  56966. 1840.40  -1
   2   4 -19  58618. 1964.32   1
   2   4 -19  63462. 2092.00   1
  -2   4  19  58505. 2063.84   1
   2  -4 -18 2198.65 494.930   1
   2  -4 -18 1984.23 386.030   1
  -2  -4  18 1580.17 211.603   1
  -2  -4  18 1530.60 140.030   1
   2   4 -18 1699.59 215.696   1
   2   4 -18 2015.77 200.450  -1
  -2   4  18 1936.54 261.622   1
  -2   4  18 1885.47 398.047   1
   2  -4 -17  76155. 2881.71   1
   2  -4 -17  75779. 2787.83   1
  -2  -4  17  75516. 2423.58   1
  -2  -4  17  74615. 2368.38   1
   2   4 -17  76568. 2469.39   1
   2   4 -17  76342. 2442.73   1
  -2   4  17  73488. 2525.34   1
  -2   4  17  76943. 2826.51   1
   2  -4 -15 8362.74 616.973   1
   2  -4 -15 8419.07 668.418   1
  -2   4  15 8501.68 489.673   1
  -2   4  15 8554.25 631.993   1
   2  -4 -14  735.64 283.252   1
  -2   4  14  176.87 264.100   1
  -2   4  14  562.90 189.035   1
   2  -4 -13 121292. 4115.66   1
  -2   4  13 123582. 4059.33   1
   2  -4 -12  378.52 262.523   1
  -2   4  12   76.79 159.895   1
  -2   4  11  21889. 1058.96   1
  -2   4  11  19594. 827.262   1
   2  -4 -10 1072.47 274.052   1
  -2   4  10  851.67 189.448   1
   2  -4  -9  40030. 1539.24   1
   2  -4  -9  39917. 1445.36   1
  -2   4   9  39992. 1452.12   1
  -2   4   9  42471. 1633.87  -1
   2  -4  -8 5110.77 422.455   1
   2  -4  -8 5118.28 343.297   1
  -2   4   8 4904.24 340.180   1
  -2   4   8 5448.74 435.974   1
   2  -4  -7 395418.  12467.   1
   2  -4  -7 384904.  12069.   1
  -2   4   7 396920.  12535.   1
  -2   4   7 399924.  12538.   1
  -2  -4   6  23992. 796.094   1
  -2  -4   6  25516. 827.262   1
   2   4  -6  20083. 654.900   1
   2   4  -6  21348. 699.211   1
   2  -4  -5  26219. 1048.44   1
   2  -4  -5  24671. 946.676   1
   2   4  -5  26632. 888.846   1
  -2   4   5  25539. 972.211   1
  -2   4   5  26613. 1076.98   1
   2  -4  -4 5989.48 399.173   1
   2  -4  -4 5223.43 325.685   1
  -2  -4   4 6008.26 271.310   1
  -2  -4   4 4990.61 266.954   1
   2   4  -4 4859.18 231.956   1
   2   4  -4 5490.04 273.789   1
  -2   4   4 6177.24 416.447   1
  -2   4   4 5069.47 317.424   1
   2  -4  -3  65340. 2230.19   1
   2  -4  -3  67142. 2242.21   1
  -2  -4   3  67105. 2203.90   1
  -2  -4   3  63537. 2063.84   1
   2   4  -3  70785. 2281.64   1
   2   4  -3  70409. 2290.27   1
  -2   4   3  67067. 2234.32   1
  -2   4   3  68419. 2343.60   1
   2  -4  -2 6616.59 358.430   1
   2  -4  -2 6075.85 367.855   1
  -2  -4   2 6823.12 358.993   1
   2   4  -2 6841.90 327.337   1
   2   4  -2 6977.09 376.267   1
  -2   4   2 6293.65 340.330   1
  -2   4   2 6425.08 402.178   1
   2  -4  -1 259106. 8144.94   1
   2  -4  -1 243597. 7686.81  -1
  -2  -4   1 244649. 7698.08   1
  -2  -4   1 240030. 7570.40   1
   2   4  -1 286444. 9038.67   1
   2   4  -1 266579. 8358.99   1
  -2   4   1 252910. 8002.25   1
  -2   4   1 257041. 8062.33   1
   2  -4   0  14240. 580.172   1
   2  -4   0  15130. 624.483   1
  -2  -4   0  13710. 604.956   1
   2   4   0  13958. 606.458   1
  -2   4   0  14626. 577.919   1
  -2   4   0  16012. 678.557   1
   2  -4   1 2277.88 205.858   1
   2  -4   1 2637.62 200.826  -1
  -2  -4  -1 2354.11 249.831   1
  -2  -4  -1 2727.37 260.833   1
   2   4   1 2797.97 264.476   1
  -2   4  -1 2649.27 190.875   1
  -2   4  -1 2482.91 233.008   1
   2  -4   2  17664. 674.802   1
  -2  -4  -2  16684. 732.256   1
  -2  -4  -2  18216. 764.926   1
   2   4   2  17330. 745.399  -1
   2  -4   3  37927. 1283.89   1
  -2  -4  -3  37499. 1373.64  -1
  -2  -4  -3  39654. 1464.14   1
   2   4   3  43184. 1560.27   1
  -2   4  -3  42959. 1414.19   1
   2  -4   4 5707.84 294.818   1
  -2  -4  -4 6605.33 435.974   1
  -2  -4  -4 5073.22 376.267   1
   2   4   4 7063.46 443.860   1
  -2   4  -4 7574.16 316.447   1
  -2   4  -4 6860.68 347.127   1
   2  -4   5 222493. 6954.56   1
  -2  -4  -5 239917. 7660.53   1
   2   4   5 247916. 7908.37   1
  -2   4  -5 249793. 7822.00   1
  -2   4  -5 254600. 7927.14   1
   2  -4   6  43635. 1425.83   1
   2  -4   6  40969. 1346.60   1
  -2  -4  -6  47127. 1730.38   1
  -2  -4  -6  42846. 1613.97   1
   2   4   6  45212. 1674.80   1
   2   4   6  42020. 1503.94   1
  -2   4  -6  47127. 1565.15   1
  -2   4  -6  46789. 1522.34   1
   2  -4   7  10822. 411.941   1
   2  -4   7  11059. 429.966   1
  -2  -4  -7  10736. 605.707   1
  -2  -4  -7  11284. 628.614   1
   2   4   7  10800. 536.237   1
   2   4   7  11085. 617.348   1
  -2   4  -7  10924. 430.717   1
  -2   4  -7  11138. 452.497   1
   2  -4   8  553.89  98.911   1
   2  -4   8  631.62 125.723   1
  -2  -4  -8  965.08 270.709   1
  -2  -4  -8  403.68 223.845   1
   2   4   8  164.85 160.683   1
   2   4   8  346.98 224.671   1
  -2   4  -8  216.07 143.522   1
  -2   4  -8  554.26 139.054   1
   2  -4   9 137026. 4299.66   1
   2  -4   9 128915. 4078.10   1
  -2  -4  -9 124446. 4179.49   1
   2   4   9 136049. 4431.09   1
  -2   4  -9 126887. 4021.78   1
  -2   4  -9 123207. 3901.61   1
   2  -4  10  10398. 396.545   1
   2  -4  10 9181.37 412.317   1
  -2  -4 -10 8798.34 584.678   1
  -2  -4 -10 8742.01 589.560   1
   2   4  10  10950. 553.135   1
   2   4  10 9669.54 631.618   1
  -2   4 -10 9710.84 431.092   1
   2  -4  11 120315. 3788.96   1
   2  -4  11 116673. 3734.13   1
  -2  -4 -11 116185. 3961.69   1
   2   4  11 109388. 3612.84  -1
  -2   4 -11 111228. 3539.99   1
  -2   4 -11 116823. 3742.39   1
   2  -4  12 6687.94 375.516   1
  -2  -4 -12 6192.26 524.971   1
   2   4  12 5752.90 395.418   1
  -2   4 -12 6755.53 371.986   1
   2  -4  13  998.87 236.988   1
  -2  -4 -13  761.55 284.604   1
   2   4  13  406.31 182.163   1
  -2   4 -13  286.67 178.633   1
   2  -4  14 3346.60 320.503   1
  -2  -4 -14 2281.64 397.296   1
   2   4  14 1502.06 381.524   1
  -2   4 -14 1978.22 240.405   1
  -2   4 -14 1642.88 235.298   1
   2  -4  15 194179. 6098.38   1
   2  -4  15 203117. 6500.18   1
  -2  -4 -15 201126. 6665.41   1
   2   4  15 216372. 7101.01   1
  -2   4 -15 212016. 6676.67   1
  -2   4 -15 212467. 6763.04   1
   2  -4  16 2680.81 236.350   1
   2  -4  16 2438.60 362.561   1
  -2  -4 -16 2153.96 402.553   1
  -2  -4 -16 2050.32 396.545   1
   2   4  16 2882.84 298.460   1
   2   4  16 2211.41 399.549   1
  -2   4 -16 2081.86 278.821  -1
  -2   4 -16 1629.74 251.295   1
   2  -4  17  45926. 1561.77   1
  -2  -4 -17  45850. 1889.97   1
  -2  -4 -17  47353. 1910.25   1
   2   4  17  48855. 1935.78   1
   2   4  17  42921. 1577.92   1
  -2   4 -17  45513. 1655.27   1
  -2   4 -17  44574. 1536.99   1
   2  -4  18 2363.87 219.001   1
   2  -4  18 1954.19 255.013   1
  -2  -4 -18 2368.75 473.901   1
  -2  -4 -18 2622.98 462.260  -1
   2   4  18 1237.70 385.655   1
   2   4  18 2219.68 261.397   1
  -2   4 -18 2205.41 289.035   1
  -2   4 -18 2091.62 312.955   1
   2  -4  19 8869.69 453.248   1
   2  -4  19 9849.78 452.497   1
  -2  -4 -19 9804.72 747.652   1
  -2  -4 -19 9635.74 752.909   1
   2   4  19 9489.29 520.841   1
   2   4  19 9767.17 690.949   1
  -2   4 -19 9196.39 571.535   1
  -2   4 -19 9549.37 517.086   1
   2  -4  20 3196.02 252.497   1
   2  -4  20 2682.31 290.086   1
  -2  -4 -20 3320.69 521.967   1
  -2  -4 -20 3980.47 536.237   1
   2   4  20 3369.13 470.146   1
   2   4  20 2348.85 280.510   1
  -2   4 -20 3473.52 374.089   1
  -2   4 -20 2753.66 370.709   1
   2  -4  21  77844. 2587.68   1
  -2  -4 -21  80548. 3031.17   1
  -2  -4 -21  84228. 3143.07   1
   2   4  21  83477. 3028.91   1
  -2   4 -21  87796. 2942.92   1
   2  -4  22  435.60 269.470  -1
   2  -4  22  130.79 148.667   1
  -2  -4 -22   96.92 367.780   1
   2   4  22  339.88 345.738   1
  -2   4 -22  -48.40 301.464   1
   2  -4  23  12692. 562.147   1
   2  -4  23  12354. 640.630   1
   2   4  23  12933. 841.907   1
   2   4  23  12730. 628.614   1
  -2   4 -23  12043. 803.604   1
  -2   4 -23  10819. 653.398   1
   2  -4  24  886.59 200.112   1
   2  -4  24  874.20 335.524   1
  -2  -4 -24 1013.52 449.493   1
   2   4  24  849.79 201.164   1
  -2   4 -24 1362.75 413.443   1
  -2   4 -24 1244.46 377.394   1
   2  -4  25 6958.31 398.798   1
  -2  -4 -25 6244.83 674.427   1
  -2  -4 -25 6462.63 706.346   1
  -2   4 -25 6135.93 631.242   1
   2  -4  26 3666.54 474.277  -1
   2  -4  26 4003.00 317.799   1
  -2  -4 -26 4389.78 611.340   1
  -2  -4 -26 5170.85 661.284   1
   2   4  26 3594.44 312.054   1
   2   4  26 4772.81 562.523   1
  -2   4 -26 2386.78 496.808   1
  -2   4 -26 3800.22 586.180   1
   2  -4  27  27124. 1170.11   1
   2  -4  27  23549. 921.892   1
  -2  -4 -27  25509. 1389.78   1
  -2  -4 -27  23462. 1304.54   1
   2   4  27  25483. 1269.99   1
   2   4  27  23462. 958.692   1
  -2   4 -27  26891. 1393.92   1
  -2   4 -27  24532. 1178.74   1
   2  -4  28 2249.34 485.167   1
   2  -4  28 2708.22 290.499   1
  -2  -4 -28 1886.22 538.490  -1
   2   4  28 2788.58 504.318   1
   2   4  28 2565.15 268.306   1
  -2   4 -28 1904.24 605.332   1
  -2   4 -28 1731.88 581.299   1
   2  -4  29  195.64 203.605   1
   2  -4  29  398.05 438.227   1
  -2  -4 -29  216.86 436.725   1
   2   4  29  739.39 174.352   1
  -2   4 -29  276.53 576.793   1
  -2   4 -29  314.38 584.303   1
   2  -4  30 2512.58 514.081   1
   2  -4  30 3652.27 336.425   1
  -2  -4 -30 3003.00 611.340   1
   2   4  30 3241.45 291.738   1
   2   4  30 4029.29 569.282   1
  -2   4 -30 3440.48 752.159   1
  -2   4 -30 1580.55 643.634   1
   2  -4  31 2761.54 506.571   1
  -2  -4 -31 2797.22 599.699   1
   2   4  31 3090.50 536.237   1
   2   4  31 3623.73 322.531   1
  -2   4 -31 2610.21 697.333   1
  -2   4 -31 3314.30 821.253   1
   2  -4  32  122.46 243.560  -1
   2  -4  32  -47.28 456.627   1
  -2  -4 -32 -334.55 407.810   1
   2   4  32  233.61 168.569   1
   2   4  32  205.37 422.455   1
  -2   4 -32  520.09 703.341   1
  -2   4 -32 -287.42 770.559   1
  -2  -4 -33 6012.01 755.538   1
   2   4  33 9707.09 541.119   1
  -2  -4 -34  491.93 455.501   1
   2   4  34 1126.55 312.842   1
   2  -5 -34 1454.00 548.629   1
   2  -5 -33 4048.06 641.757   1
  -2   5  33 5790.46 437.476   1
   2  -5 -32   97.26 462.636   1
  -2   5  32 -188.36 170.409   1
  -2   5  32   77.17 356.027   1
  -2  -5  31 2784.83 272.587   1
   2   5 -31 2539.24 553.511   1
  -2   5  31 3099.51 530.229  -1
   2  -5 -30  11461. 919.639   1
  -2  -5  30  13109. 526.098   1
   2   5 -30  12696. 789.335   1
  -2   5  30  11802. 596.319   1
  -2   5  30  12302. 902.740   1
   2  -5 -29  594.82 449.117   1
  -2  -5  29  827.64 170.109   1
   2   5 -29  583.55 431.843   1
   2   5 -29  499.81 430.717   1
  -2   5  29  954.94 207.210   1
  -2   5  29  885.09 435.599   1
   2  -5 -28 4686.44 612.842   1
  -2  -5  28 4836.65 265.978   1
   2   5 -28 4667.66 482.163   1
  -2   5  28 4003.00 338.077   1
  -2   5  28 5441.23 642.883   1
   2  -5 -27 8400.29 930.529   1
  -2  -5  27 9545.62 382.275   1
  -2  -5  27 8385.27 447.615   1
   2  -5 -26 4416.07 730.754   1
   2  -5 -26 5103.26 637.626   1
  -2  -5  26 4055.57 273.789   1
  -2  -5  26 4735.26 236.200   1
  -2   5  26 6113.40 645.136   1
  -2   5  26 5309.80 377.394   1
   2   5 -25 1746.15 282.501   1
  -2   5  25 2163.72 479.158   1
   2  -5 -24  14037. 1166.35   1
   2  -5 -24  14454. 952.309   1
  -2   5  24  13274. 643.634   1
  -2   5  24  14885. 996.619   1
   2  -5 -23 4881.71 693.578   1
   2  -5 -23 5302.29 615.471   1
  -2   5  23 6605.33 426.211   1
  -2   5  23 5223.43 619.601   1
   2  -5 -22 7904.61 796.094   1
   2  -5 -22 7176.11 687.194   1
  -2   5  22 8159.96 707.097   1
  -2   5  22 8389.03 500.563   1
   2  -5 -21  32719. 1621.85   1
   2  -5 -21  32655. 1522.72   1
  -2   5  21  34510. 1571.16  -1
  -2   5  21  33124. 1283.89   1
   2  -5 -20  33567. 1537.36   1
   2  -5 -20  35287. 1685.32   1
  -2   5  20  35036. 1567.40  -1
  -2   5  20  31322. 1222.30   1
   2  -5 -19 4059.33 519.339   1
   2  -5 -19 4367.25 611.340   1
  -2   5  19 3686.82 331.393   1
  -2   5  19 3631.61 522.718   1
   2  -5 -18  27112. 1304.54   1
   2  -5 -18  31769. 1557.26   1
  -2   5  18  27965. 1124.67   1
  -2   5  18  29831. 1407.06   1
   2  -5 -17  13218. 822.755   1
  -2   5  17  14619. 701.464   1
   2  -5 -16   -0.62 298.760   1
  -2   5  16  191.18 184.040   1
   2  -5 -15 111340. 3890.35   1
  -2   5  15 114194. 3788.96   1
   2  -5 -13  763.42 294.592   1
  -2   5  13  472.77 193.916  -1
   2  -5 -12  24484. 1178.37   1
   2  -5 -12  22989. 1086.74   1
  -2   5  12  22993. 955.313   1
  -2   5  12  23443. 1143.82   1
  -2   5  11  75929. 2601.20   1
  -2   5  11  76004. 2764.92   1
   2  -5 -10 4998.12 351.896   1
   2  -5 -10 3652.64 402.178   1
  -2   5  10 4949.30 368.043   1
  -2   5  10 3619.97 432.594   1
   2  -5  -9  54149. 2005.63   1
   2  -5  -9  55914. 1947.05   1
  -2   5   9  59444. 2205.78   1
  -2   5   9  57980. 2021.40   1
   2  -5  -8  66128. 2369.88   1
  -2   5   8  63913. 2198.27   1
   2  -5  -7 8077.35 539.241   1
  -2  -5   7 7960.94 290.124   1
  -2  -5   7 8186.25 301.126   1
  -2   5   7 8659.40 575.290   1
  -2   5   7 9294.02 493.052   1
   2  -5  -6  30860. 1161.10   1
   2  -5  -6  28393. 1167.48   1
  -2  -5   6  30924. 1024.03   1
   2   5  -6  30886. 1025.16   1
  -2   5   6  31168. 1173.49   1
  -2   5   6  31115. 1275.63   1
   2  -5  -5  70334. 2453.62   1
   2  -5  -5  75441. 2531.35   1
  -2  -5   5  68494. 2208.78   1
  -2  -5   5  70747. 2301.91  -1
   2   5  -5  76906. 2473.90   1
   2   5  -5  76117. 2431.09   1
  -2   5   5  74840. 2511.45   1
  -2   5   5  74502. 2607.58   1
   2  -5  -4 2991.74 261.885   1
  -2  -5   4 3343.22 252.572   1
  -2  -5   4 3601.95 241.720   1
   2   5  -4 3013.89 241.194   1
   2   5  -4 3067.21 196.883   1
  -2   5   4 3288.77 347.653   1
   2  -5  -3  26365. 1069.84   1
   2  -5  -3  26673. 1004.51   1
  -2  -5   3  25471. 959.819   1
   2   5  -3  27683. 970.333   1
  -2   5   3  28201. 1142.32  -1
  -2   5   3  27597. 1038.30   1
   2  -5  -2  49831. 1769.81   1
   2  -5  -2  48855. 1680.06   1
   2   5  -2  51145. 1708.97   1
   2   5  -2  49643. 1704.84   1
  -2   5   2  50019. 1717.23   1
  -2   5   2  51446. 1853.55   1
   2  -5  -1  23793. 894.104   1
   2  -5  -1  21915. 890.724   1
  -2  -5   1  23511. 934.284   1
  -2  -5   1  22550. 889.973   1
   2   5  -1  26891. 973.337   1
   2   5  -1  25933. 996.619   1
  -2   5   1  24739. 923.394   1
  -2   5   1  24232. 1002.63   1
   2  -5   0  54037. 1870.45   1
   2  -5   0  52798. 1790.46   1
  -2  -5   0  54300. 1912.50   1
  -2  -5   0  56778. 1969.58   1
   2   5   0  55839. 1885.47   1
   2   5   0  57867. 2006.38   1
  -2   5   0  55727. 1958.32   1
  -2   5   0  54412. 1828.01   1
   2  -5   1 150432. 4795.34   1
   2  -5   1 139054. 4472.40   1
  -2  -5  -1 144273. 4701.46   1
  -2  -5  -1 134660. 4378.52   1
   2   5   1 154149. 4930.52   1
   2   5   1 151934. 4923.01   1
  -2   5  -1 148629. 4806.60   1
  -2   5  -1 152046. 4825.38   1
  -2  -5  -2  20687. 878.332   1
  -2  -5  -2  21036. 907.998   1
   2   5   2  21971. 950.431   1
   2   5   2  21322. 856.552   1
  -2   5  -2  21348. 857.303  -1
  -2   5  -2  20304. 746.901   1
   2  -5   3 5572.66 296.169   1
   2  -5   3 5362.37 324.934   1
  -2  -5  -3 4712.73 400.676   1
   2   5   3 5414.94 414.570  -1
  -2   5  -3 5617.72 281.975   1
  -2   5  -3 5035.67 329.440   1
   2  -5   4  98197. 3147.57   1
   2  -5   4 102891. 3307.54   1
  -2  -5  -4 106158. 3571.53   1
  -2  -5  -4 100939. 3418.70   1
   2   5   4 102178. 3359.37   1
   2   5   4 104694. 3514.83   1
  -2   5  -4 107285. 3482.91   1
  -2   5  -4 105107. 3334.58   1
   2  -5   5  29974. 1046.94   1
  -2  -5  -5  32689. 1315.81  -1
  -2  -5  -5  29869. 1224.93   1
   2   5   5  33887. 1343.60   1
   2   5   5  33504. 1245.96   1
  -2   5  -5  33545. 1119.41   1
   2  -5   6  24769. 867.442   1
   2  -5   6  25295. 882.838   1
  -2  -5  -6  27465. 1168.98   1
  -2  -5  -6  28584. 1202.40   1
   2   5   6  28427. 1187.76   1
   2   5   6  26388. 1031.17   1
  -2   5  -6  27762. 941.419   1
  -2   5  -6  28795. 1046.94   1
   2  -5   7 112730. 3568.90   1
  -2  -5  -7 115321. 3909.12   1
   2   5   7 116523. 3822.75   1
  -2   5  -7 122681. 3871.57   1
  -2   5  -7 117424. 3758.91   1
   2  -5   8  35851. 1188.13   1
   2  -5   8  33436. 1119.79   1
  -2  -5  -8  35655. 1454.37   1
  -2  -5  -8  34713. 1427.34   1
   2   5   8  36046. 1460.01   1
   2   5   8  38378. 1412.69   1
  -2   5  -8  36605. 1220.43   1
  -2   5  -8  35937. 1235.07   1
   2  -5   9  36481. 1202.78   1
   2  -5   9  35712. 1193.01   1
  -2  -5  -9  37071. 1509.20   1
  -2  -5  -9  34390. 1421.33   1
   2   5   9  39054. 1441.61   1
   2   5   9  38716. 1554.64   1
  -2   5  -9  37627. 1263.24   1
  -2   5  -9  36433. 1241.83   1
   2  -5  10  30950. 1057.45   1
   2  -5  10  27998. 936.537   1
  -2  -5 -10  29895. 1294.03   1
  -2  -5 -10  27935. 1243.71   1
   2   5  10  30995. 1336.09   1
   2   5  10  27724. 1097.63   1
  -2   5 -10  29835. 1032.29   1
  -2   5 -10  28074. 975.591  -1
   2  -5  11 5328.57 293.353   1
  -2  -5 -11 4468.64 461.885   1
  -2  -5 -11 5790.46 512.204   1
   2   5  11 5719.11 395.043   1
   2   5  11 6237.32 532.482   1
  -2   5 -11 5444.98 302.103   1
  -2   5 -11 5966.95 311.340   1
   2  -5  12 8591.81 404.431   1
  -2  -5 -12 9185.12 638.002   1
  -2  -5 -12 7776.94 603.454   1
   2   5  12 8486.66 638.753   1
  -2   5 -12 6995.86 351.408   1
  -2   5 -12 7679.30 359.219   1
   2  -5  13  60796. 1948.93   1
   2  -5  13  56065. 1886.59   1
  -2  -5 -13  56365. 2203.15   1
  -2   5 -13  58430. 1937.66   1
  -2   5 -13  61697. 2019.15   1
   2  -5  14  30394. 1106.65   1
   2  -5  14  34874. 1152.46   1
  -2  -5 -14  30965. 1398.42   1
   2   5  14  31633. 1228.31   1
  -2   5 -14  30725. 1097.26   1
  -2   5 -14  31127. 1081.11   1
   2  -5  15 1725.87 156.440   1
   2  -5  15 1589.93 270.034   1
  -2  -5 -15 1861.81 396.169   1
   2   5  15 1702.59 251.032   1
  -2   5 -15 1516.33 232.632   1
  -2   5 -15 1360.87 213.518   1
   2  -5  16  14840. 571.535   1
  -2  -5 -16  15321. 901.614   1
   2   5  16  12606. 619.601   1
  -2   5 -16  13545. 606.458   1
   2  -5  17  23019. 803.604   1
  -2  -5 -17  23620. 1192.64   1
   2   5  17  23905. 987.982   1
  -2   5 -17  23504. 924.896   1
   2  -5  18 1579.04 169.433   1
   2  -5  18 1803.98 183.590   1
  -2  -5 -18 2465.64 445.737   1
  -2  -5 -18 3108.52 506.947   1
   2   5  18 2043.56 431.843   1
   2   5  18 1553.89 248.479   1
  -2   5 -18 2214.79 327.487   1
  -2   5 -18 1705.97 263.988  -1
   2  -5  19  38152. 1292.53   1
   2  -5  19  35667. 1209.91   1
  -2  -5 -19  33793. 1558.39   1
  -2  -5 -19  36493. 1638.38   1
   2   5  19  36350. 1571.16   1
   2   5  19  35944. 1365.00   1
  -2   5 -19  34378. 1298.91   1
  -2   5 -19  36470. 1315.81   1
   2  -5  20  14713. 579.421   1
   2  -5  20  15768. 604.956   1
  -2  -5 -20  17202. 1032.67   1
   2   5  20  16526. 948.553   1
  -2   5 -20  14900. 726.999   1
  -2   5 -20  15449. 710.852   1
   2  -5  21  475.40 144.686   1
   2  -5  21  370.63 180.848   1
  -2  -5 -21  240.33 369.057   1
  -2  -5 -21 1029.29 423.582   1
   2   5  21  457.75 184.341   1
   2   5  21  629.36 367.818   1
   2  -5  22  21461. 789.710   1
   2  -5  22  22276. 844.160   1
  -2  -5 -22  24033. 1266.99   1
  -2  -5 -22  25531. 1368.38   1
   2   5  22  23252. 960.570   1
   2   5  22  26707. 1327.45  -1
  -2   5 -22  23323. 1027.04   1
  -2   5 -22  24859. 1041.31   1
   2  -5  23  18198. 703.717   1
   2  -5  23  17289. 709.350  -1
  -2  -5 -23  18175. 1098.01   1
  -2  -5 -23  17886. 1119.79   1
   2   5  23  18453. 1030.42   1
   2   5  23  17950. 791.963   1
  -2   5 -23  18397. 910.251   1
  -2   5 -23  16444. 832.894   1
   2  -5  24   86.56 225.422   1
   2  -5  24   -5.83 157.341   1
  -2  -5 -24 -282.84 329.478   1
  -2  -5 -24 -120.20 408.186   1
   2   5  24   -8.87 348.554   1
   2   5  24   69.70 153.023   1
  -2   5 -24 1114.16 475.779   1
  -2   5 -24   -2.20 353.023   1
   2  -5  25  10004. 456.252   1
   2  -5  25 9669.54 525.722   1
   2   5  25 9658.27 745.024   1
   2   5  25 9958.68 529.853   1
  -2   5 -25 9898.60 716.860   1
   2  -5  26 4547.50 402.929   1
  -2  -5 -26 5831.76 735.260   1
  -2  -5 -26 4472.40 669.169  -1
   2   5  26 5895.60 392.414   1
   2   5  26 5523.84 606.083  -1
   2  -5  27  458.13 193.278   1
   2  -5  27  704.09 301.089   1
  -2  -5 -27  905.37 460.007   1
  -2   5 -27   85.92 602.703  -1
   2  -5  28  16485. 801.351  -1
   2  -5  28  16647. 689.072   1
  -2  -5 -28  16943. 1104.77   1
   2   5  28  15212. 687.570   1
  -2   5 -28  13038. 1041.68   1
  -2   5 -28  16474. 1045.44  -1
   2  -5  29 4892.97 475.779   1
   2  -5  29 5215.92 346.489   1
  -2  -5 -29 5317.31 677.055   1
   2   5  29 5831.76 392.414   1
   2   5  29 6507.69 658.655   1
  -2   5 -29 3230.56 875.703   1
  -2   5 -29 4769.05 697.709   1
   2  -5  30  884.72 367.593   1
   2  -5  30 1206.16 294.179   1
  -2  -5 -30  290.99 410.439   1
   2   5  30 1384.53 452.497   1
   2   5  30 1279.01 224.221   1
  -2   5 -30  449.87 825.009   1
  -2   5 -30  883.59 570.409  -1
   2   5  31 3136.68 312.429   1
  -2  -5 -32 4708.97 689.447   1
   2   5  32 5951.93 438.227   1
   2  -6 -32 8986.10 790.086   1
  -2   6  32  13537. 690.949   1
   2  -6 -31 1130.30 504.318  -1
  -2   6  31 1487.42 256.740   1
   2  -6 -30  356.03 443.109   1
  -2   6  30  785.58 463.387   1
  -2   6  30 1304.54 238.753   1
   2  -6 -29  541.49 403.304   1
   2  -6 -28  18119. 1123.17   1
  -2   6  28  18156. 1099.14   1
  -2   6  28  17360. 773.938   1
  -2   6  27   40.67 163.650   1
   2  -6 -26  18201. 1122.79   1
  -2   6  26  18205. 1093.13   1
  -2   6  26  16763. 757.791  -1
   2  -6 -25  152.20 496.057   1
  -2   6  25  876.83 420.202   1
   2  -6 -24  103.04 404.055   1
   2  -6 -24  289.22 502.816   1
  -2   6  24  -51.56 359.181   1
  -2   6  24  199.02 175.291   1
   2  -6 -23 1053.70 390.161   1
   2  -6 -23  777.69 508.824   1
  -2   6  23 1383.03 452.497   1
  -2   6  23  844.91 213.331   1
   2  -6 -22  47878. 2275.25   1
   2  -6 -22  47991. 2001.50   1
  -2   6  22  46714. 1698.83   1
  -2   6  22  49869. 2143.07   1
   2  -6 -21 3297.41 596.319   1
   2  -6 -21 2137.81 479.158   1
  -2   6  21 1909.12 493.428   1
  -2   6  21 1679.68 247.277   1
   2  -6 -20  15422. 954.562   1
  -2   6  20  15802. 1008.64   1
  -2   6  20  13973. 679.684   1
   2  -6 -19 4446.11 561.021   1
  -2   6  19 4607.58 371.911   1
   2  -6 -18 3442.73 502.816   1
  -2   6  18 3258.73 321.254   1
   2  -6 -17 9624.47 720.240   1
  -2   6  17 8813.36 509.951   1
   2  -6 -16  49305. 1987.23   1
  -2   6  16  52122. 1870.82   1
   2  -6 -15 1600.82 366.879   1
  -2   6  15 1932.03 262.824   1
   2  -6 -14  12906. 911.377   1
   2  -6 -14  13819. 827.637   1
  -2   6  14  13447. 865.940   1
  -2   6  14  13860. 684.566   1
   2  -6 -13  17983. 965.452   1
   2  -6 -13  15588. 986.856   1
  -2   6  13  18220. 995.493   1
  -2   6  13  19347. 849.417   1
   2  -6 -12 9917.38 747.652   1
  -2   6  12  11656. 771.310   1
   2  -6 -11 4033.04 454.374   1
   2  -6 -11 4021.78 508.824   1
  -2   6  11 4641.38 369.771   1
  -2   6  11 5009.38 522.343   1
   2  -6 -10  79910. 2859.93   1
  -2   6  10  82088. 2789.33   1
  -2   6  10  85280. 3044.68   1
   2  -6  -9  25655. 1159.22   1
   2  -6  -9  24949. 988.358   1
  -2   6   9  27078. 1239.58   1
  -2   6   9  27938. 1098.38   1
   2  -6  -8  46752. 1799.47   1
   2  -6  -8  47015. 1671.42   1
  -2   6   8  48704. 1894.10   1
  -2   6   8  50394. 1792.34   1
   2  -6  -7  17435. 866.315   1
  -2  -6   7  16050. 568.531   1
   2   6  -7  20950. 722.117   1
  -2   6   7  19455. 966.203   1
  -2   6   7  19685. 835.523   1
   2  -6  -6  67968. 2424.33   1
   2  -6  -6  67180. 2288.77   1
  -2  -6   6  67518. 2208.41   1
  -2  -6   6  66804. 2164.10   1
   2   6  -6  73188. 2366.13   1
   2   6  -6  71949. 2305.29   1
  -2   6   6  72850. 2481.03   1
  -2   6   6  73601. 2644.38   1
   2  -6  -5  240.93 237.176   1
  -2  -6   5   23.95 137.401   1
   2   6  -5  139.69 107.473  -1
   2  -6  -4  87796. 2908.37  -1
   2  -6  -4  89485. 3066.09   1
  -2  -6   4  90762. 2971.46   1
  -2  -6   4  88659. 2915.51   1
   2   6  -4  94142. 3073.60   1
   2   6  -4  92114. 2963.20   1
  -2   6   4  92077. 3058.20   1
  -2   6   4  93804. 3245.58   1
   2  -6  -3  24683. 953.811   1
   2  -6  -3  22381. 975.215   1
  -2  -6   3  22403. 894.855   1
  -2  -6   3  23203. 920.014   1
   2   6  -3  25227. 974.088   1
   2   6  -3  26252. 943.296   1
  -2   6   3  26898. 1035.67   1
  -2   6   3  24198. 1066.47   1
   2  -6  -2  38228. 1369.51   1
   2  -6  -2  37739. 1437.48  -1
  -2  -6   2  37011. 1364.63   1
  -2  -6   2  37398. 1391.29  -1
   2   6  -2  41307. 1490.05   1
   2   6  -2  41607. 1436.35   1
  -2   6   2  40631. 1561.77   1
  -2   6   2  40969. 1457.38   1
   2  -6  -1 6211.03 365.039   1
  -2  -6   1 6387.53 437.852   1
   2   6  -1 5966.95 409.312   1
   2   6  -1 7014.64 377.394   1
  -2   6   1 5989.48 450.619   1
   2  -6   0 100488. 3339.84   1
   2  -6   0 102929. 3348.48   1
  -2  -6   0 104206. 3484.04   1
  -2  -6   0 115959. 3856.55   1
   2   6   0 124221. 4085.61   1
   2   6   0 113293. 3676.68   1
  -2   6   0 109726. 3662.03   1
  -2   6   0 109012. 3530.23   1
   2  -6   1  481.41 143.259   1
   2  -6   1 1021.03 226.586   1
  -2  -6  -1  723.62 277.206  -1
   2   6   1 1108.15 258.806   1
  -2   6  -1  474.65 219.602   1
  -2   6  -1  770.18 160.571   1
   2  -6   2 111416. 3588.06   1
   2  -6   2 110589. 3611.71   1
  -2  -6  -2 107247. 3630.49   1
  -2  -6  -2 107961. 3653.77   1
   2   6   2 117874. 3931.65   1
   2   6   2 120240. 3912.88  -1
  -2   6  -2 115584. 3815.24   1
  -2   6  -2 118212. 3788.96   1
   2  -6   3  149.64 125.422   1
  -2  -6  -3  100.68 220.390   1
  -2  -6  -3   57.42 255.877   1
   2   6   3  223.09 235.749   1
   2   6   3  494.93 172.212   1
  -2   6  -3  729.63 222.944   1
  -2   6  -3  354.94 133.909   1
   2  -6   4 7822.00 422.831   1
  -2  -6  -4 8295.15 570.784   1
  -2  -6  -4 7769.43 542.245   1
   2   6   4 6710.47 410.439   1
   2   6   4 7446.48 524.596   1
  -2   6  -4 7371.38 344.724   1
  -2   6  -4 8205.02 470.522   1
   2  -6   5 7224.93 347.202   1
   2  -6   5 6015.77 362.373   1
  -2  -6  -5 6594.06 509.200   1
  -2   6  -5 8137.43 356.290   1
  -2   6  -5 6860.68 421.704   1
   2  -6   6  81149. 2618.47   1
   2  -6   6  74089. 2410.06   1
  -2  -6  -6  76230. 2715.73   1
  -2  -6  -6  79271. 2828.01   1
   2   6   6  85242. 2873.07   1
   2   6   6  83853. 2940.67   1
  -2   6  -6  81262. 2696.96   1
  -2   6  -6  88246. 2813.37   1
   2  -6   7 2349.60 234.697   1
  -2  -6  -7 2654.52 382.275   1
  -2  -6  -7 2177.99 372.925   1
   2   6   7 2715.36 285.617   1
   2   6   7 2739.39 381.900   1
  -2   6  -7 3076.23 204.619   1
   2  -6   8  74953. 2402.93   1
   2  -6   8  75704. 2436.72   1
  -2  -6  -8  81525. 2934.28   1
  -2  -6  -8  76943. 2772.06   1
   2   6   8  78708. 2675.93   1
   2   6   8  82276. 2916.63  -1
  -2   6  -8  83139. 2719.49   1
  -2   6  -8  79835. 2552.01   1
   2  -6   9 4570.03 226.549   1
   2  -6   9 4292.15 247.427   1
  -2  -6  -9 3615.09 449.493   1
  -2  -6  -9 4145.70 457.754   1
   2   6   9 5362.37 387.532   1
   2   6   9 5843.03 526.098   1
  -2   6  -9 5046.93 282.163   1
  -2   6  -9 4645.13 291.363   1
   2  -6  10 3064.96 210.514   1
  -2  -6 -10 3533.23 447.240  -1
  -2  -6 -10 3129.93 434.096   1
   2   6  10 4543.74 361.547   1
   2   6  10 3524.59 448.366   1
  -2   6 -10 3777.69 252.797   1
  -2   6 -10 3954.18 252.685   1
   2  -6  11  12681. 497.934  -1
   2  -6  11  13169. 469.771   1
  -2  -6 -11  11416. 755.914   1
   2   6  11  14885. 855.050   1
  -2   6 -11  13609. 533.608   1
  -2   6 -11  13744. 530.604  -1
   2  -6  12  37311. 1208.41   1
  -2  -6 -12  39354. 1662.41   1
  -2  -6 -12  37702. 1615.85   1
   2   6  12  39617. 1482.54   1
   2   6  12  42133. 1728.12   1
  -2   6 -12  42208. 1404.05   1
   2  -6  13  150.43  72.963   1
  -2  -6 -13   62.22 326.136   1
  -2  -6 -13   16.20 305.632   1
   2   6  13  336.80 323.582   1
   2   6  13  327.19 181.562  -1
  -2  -6 -14  42846. 1852.42   1
  -2  -6 -14  38678. 1658.65   1
   2   6  14  39091. 1461.88   1
   2   6  14  42433. 1808.11   1
  -2  -6 -15  14258. 890.348   1
  -2  -6 -15  13500. 882.838   1
   2   6  15  15509. 730.003   1
   2   6  15  15062. 916.635  -1
  -2  -6 -16 9688.31 738.264   1
  -2  -6 -16 7882.08 725.872   1
   2   6  16  10192. 556.890   1
  -2  -6 -17  14739. 926.398   1
   2   6  17  15772. 739.391   1
  -2  -6 -19 2310.17 481.036   1
   2   6  19 2906.87 296.920   1
  -2  -6 -20  17871. 1055.95   1
   2   6  20  17172. 770.934   1
   2   6  20  18810. 1080.73   1
   2   6  21 9286.51 745.399   1
   2   6  21 9324.06 522.343   1
   2  -6  22 5572.66 230.116   1
  -2  -6 -22 5152.08 632.369   1
  -2  -6 -22 3935.41 609.087   1
   2   6  22 5215.92 584.678   1
   2   6  22 5955.68 402.178   1
   2  -6  23  787.46 111.115   1
  -2  -6 -23  493.80 401.051   1
  -2  -6 -23  691.70 465.264   1
   2   6  23  834.02 204.731   1
   2   6  23  330.53 409.688   1
   2  -6  24  26669. 887.344   1
  -2  -6 -24  26759. 1488.55  -1
   2   6  24  25918. 1282.01   1
   2  -6  25 3049.19 169.245   1
  -2  -6 -25 3336.83 565.152   1
   2   6  25 3047.69 295.418   1
   2   6  25 3469.39 547.127   1
   2  -6  26 8850.91 337.213   1
  -2  -6 -26 8884.71 801.727   1
   2  -6  27  895.61 137.814   1
   2   6  27 1135.56 412.317   1
   2   6  27 1265.86 211.904   1
   2   6  28 4378.52 587.307   1
  -2  -6 -29   39.99 376.267   1
   2   6  29 -103.19 416.072   1
   2   6  29 -101.28 160.533   1
  -2  -6 -30  14315. 1026.29   1
   2   6  30  17394. 790.837   1
  -2  -6 -31   93.50 402.553   1
   2   6  31  254.64 187.608   1
   2  -7 -30  12028. 943.296   1
  -2   7  30  16440. 762.297   1
  -2   7  29  160.27 174.014   1
   2  -7 -28  930.15 464.889   1
  -2   7  28 1326.70 471.273   1
  -2   7  28 1060.83 226.624  -1
   2  -7 -27  475.03 378.145   1
  -2   7  27  671.05 419.451   1
  -2   7  27  603.45 190.311   1
   2  -7 -26 5794.21 653.022   1
  -2   7  26 6034.54 690.949   1
  -2   7  26 6192.26 405.557  -1
   2  -7 -25  437.10 409.312  -1
  -2   7  25  337.74 182.801   1
   2  -7 -24  19808. 1138.94   1
  -2   7  24  20436. 874.201   1
  -2   7  24  20792. 1190.01   1
   2  -7 -23  669.54 520.465   1
  -2   7  23  406.68 401.427   1
   2  -7 -22 4881.71 588.809   1
  -2   7  22 5354.86 392.039   1
   2  -7 -21 1406.68 422.455   1
  -2   7  21  981.22 207.735   1
   2  -7 -20  20605. 1127.67  -1
  -2   7  20  20713. 887.344   1
   2  -7 -19 1116.41 402.929   1
  -2   7  19  590.69 199.962   1
   2  -7 -18  38228. 1683.81   1
   2  -7 -18  35727. 1765.68   1
  -2   7  18  40105. 1782.57   1
  -2   7  18  38303. 1447.24   1
   2  -7 -17 1695.08 531.731   1
  -2   7  17 1199.02 437.101   1
   2  -7 -16 5035.67 563.649   1
   2  -7 -16 4712.73 671.047   1
  -2   7  16 5234.69 598.197   1
  -2   7  16 4754.03 372.925   1
   2  -7 -15 1021.03 477.656   1
   2  -7 -15  148.89 327.863   1
  -2   7  15  250.17 193.766   1
  -2   7  15   -1.44 360.345   1
   2  -7 -14  39392. 1673.67   1
   2  -7 -14  40856. 1873.82   1
  -2   7  14  44461. 1879.83   1
  -2   7  14  42020. 1563.27   1
   2  -7 -13  378.14 330.116   1
   2  -7 -13  178.29 416.072   1
  -2   7  13  223.09 170.146   1
  -2   7  13  648.14 367.668  -1
   2  -7 -12  55539. 2151.71  -1
  -2   7  12  58205. 2060.83   1
   2  -7 -11 5414.94 531.355  -1
   2  -7 -11 5546.37 626.736   1
  -2   7  11 6327.44 603.454   1
  -2   7  11 7506.56 464.889   1
   2  -7 -10  447.99 376.643   1
   2  -7 -10  176.61 288.584   1
  -2   7  10  218.70 176.004   1
  -2   7  10  192.26 341.006  -1
   2  -7  -9 8415.31 712.729   1
  -2   7   9 8524.21 661.284   1
   2  -7  -8  82125. 3047.31   1
   2  -7  -8  85993. 3057.45   1
  -2  -7   8  84454. 2682.69   1
   2   7  -8  94555. 2990.61   1
  -2   7   8  93654. 3149.83   1
  -2   7   8  94555. 3357.11   1
   2  -7  -7 2306.04 384.153   1
  -2  -7   7 2210.29 224.446   1
  -2  -7   7 2038.68 203.605   1
   2   7  -7 2604.20 172.925   1
   2   7  -7 2951.18 242.095   1
  -2   7   7 2546.00 284.040   1
  -2   7   7 2054.82 377.394   1
   2  -7  -6  52384. 1990.61   1
   2  -7  -6  49230. 1737.51   1
  -2  -7   6  50695. 1722.12   1
   2   7  -6  56665. 1850.17   1
  -2   7   6  55351. 1945.55  -1
  -2   7   6  56027. 2141.57   1
  -2  -7   5  416.82 186.969   1
  -2  -7   5  310.66 203.004   1
   2   7  -5  188.58 189.974   1
   2   7  -5   41.49 119.865   1
  -2   7   5  346.75 269.433   1
  -2   7   5   82.69 171.235   1
   2  -7  -4 7029.66 530.604   1
   2  -7  -4 7052.19 407.059   1
  -2  -7   4 7014.64 434.848   1
  -2  -7   4 7281.25 443.109   1
   2   7  -4 7728.12 385.655   1
   2   7  -4 8017.27 461.885   1
  -2   7   4 7397.66 433.345   1
  -2   7   4 8047.31 591.438   1
   2  -7  -3 7153.58 524.971   1
  -2  -7   3 6920.76 449.117  -1
  -2  -7   3 7345.09 466.015   1
   2   7  -3 6924.51 367.743   1
   2   7  -3 6030.79 412.317   1
  -2   7   3 6965.82 413.443   1
   2  -7  -2 107398. 3621.10   1
   2  -7  -2 107848. 3511.45   1
  -2  -7   2 107660. 3584.30   1
  -2  -7   2 105633. 3530.60   1
   2   7  -2 112805. 3731.88   1
   2   7  -2 122606. 3957.94   1
  -2   7   2 113105. 3849.04   1
  -2   7   2 118288. 3852.79   1
   2  -7  -1 3969.20 393.541   1
   2  -7  -1 4558.76 302.591   1
  -2  -7   1 4337.21 407.059   1
   2   7  -1 5073.22 414.945   1
  -2   7   1 4851.67 332.069   1
  -2   7   1 4389.78 431.468  -1
   2  -7   0  45963. 1586.93   1
   2  -7   0  46639. 1712.73   1
  -2  -7   0  46602. 1753.28   1
  -2  -7   0  46376. 1743.90   1
   2   7   0  53586. 1846.41   1
   2   7   0  52309. 1917.01   1
  -2   7   0  51821. 1927.52   1
  -2   7   0  54337. 1859.93   1
   2  -7   1  17326. 699.962   1
  -2  -7  -1  20590. 956.815   1
  -2  -7  -1  18190. 884.340   1
   2   7   1  19095. 903.867   1
   2   7   1  19542. 805.106   1
  -2   7  -1  20083. 926.773  -1
   2  -7   2  10387. 562.523   1
   2  -7   2  12208. 526.098   1
  -2  -7  -2  10766. 665.039   1
  -2  -7  -2  10045. 639.879   1
   2   7   2  13199. 613.218   1
   2   7   2  12775. 716.860   1
  -2   7  -2  13233. 571.911   1
  -2   7  -2  11213. 626.361   1
   2  -7   3   79.38 212.054   1
   2  -7   3  252.46 133.871   1
  -2  -7  -3  -81.98 257.679   1
   2   7   3  141.53 158.656   1
  -2   7  -3   17.64 216.410   1
  -2   7  -3  -19.23 135.223   1
   2  -7   4 103117. 3381.90   1
   2  -7   4 103642. 3337.96   1
  -2  -7  -4  99399. 3464.89   1
  -2  -7  -4  92490. 3242.58   1
   2   7   4 107773. 3692.82   1
   2   7   4 107961. 3558.39   1
  -2   7  -4 104694. 3492.30   1
  -2   7  -4 111003. 3555.39   1
   2  -7   5 2012.77 187.608   1
   2  -7   5 1892.22 280.097   1
  -2  -7  -5 1231.32 379.647   1
  -2  -7  -5 1785.58 438.978   1
   2   7   5 1760.79 352.384   1
   2   7   5 1932.03 261.885   1
  -2   7  -5 1997.37 188.697   1
  -2   7  -5 2331.20 292.640   1
   2  -7   6  21359. 835.899   1
   2  -7   6  22358. 811.115   1
  -2  -7  -6  23154. 1113.40   1
  -2  -7  -6  22869. 1111.90   1
   2   7   6  24086. 984.227  -1
   2   7   6  25400. 1170.48   1
  -2   7  -6  23857. 964.701   1
  -2   7  -6  24754. 866.315   1
   2  -7   7  17304. 644.010   1
   2  -7   7  19354. 750.656   1
  -2  -7  -7  21003. 1059.33   1
  -2  -7  -7  19193. 1009.76   1
   2   7   7  20762. 1033.42   1
   2   7   7  18964. 828.764   1
  -2   7  -7  19553. 819.000   1
  -2   7  -7  19140. 689.823   1
   2  -7   8  31288. 1090.87   1
  -2  -7  -8  34825. 1524.97   1
  -2  -7  -8  31712. 1415.32   1
   2   7   8  38641. 1452.87   1
   2   7   8  37030. 1555.76   1
  -2   7  -8  35828. 1200.15   1
   2  -7   9 1326.32 137.176   1
   2  -7   9  873.45 180.848   1
  -2  -7  -9  754.41 360.232   1
  -2  -7  -9 1191.14 373.789   1
   2  -7  10  71761. 2288.77   1
   2  -7  10  64213. 2069.47  -1
  -2  -7 -10  69696. 2639.50   1
  -2  -7 -10  70710. 2645.51   1
   2   7  10  76380. 2812.24   1
   2   7  10  75554. 2592.19   1
  -2   7 -10  74615. 2443.11   1
  -2   7 -10  73676. 2372.13   1
   2  -7  11   27.31  74.540   1
  -2  -7 -11  373.98 391.288   1
  -2  -7 -11  439.73 305.858   1
   2   7  11 -120.99 341.532   1
   2   7  11  -74.46 175.441  -1
  -2   7 -11   86.26 128.689   1
  -2  -7 -12 8719.48 713.105   1
  -2  -7 -12 9496.80 710.852   1
   2   7  12 8929.77 506.947   1
   2   7  12  10447. 743.522   1
  -2  -7 -13  271.35 306.684   1
  -2  -7 -13  953.81 400.676  -1
   2   7  13  162.64 345.249   1
   2   7  13  526.85 195.268   1
  -2  -7 -14  29350. 1386.78   1
  -2  -7 -14  28487. 1395.42   1
   2   7  14  33203. 1494.18   1
   2   7  14  32279. 1254.22   1
  -2  -7 -15 4273.37 541.494  -1
  -2  -7 -15 3137.06 524.220   1
   2   7  15 4862.93 370.822   1
   2   7  15 4363.50 530.604   1
  -2  -7 -16  39279. 1779.57   1
   2   7  16  41495. 1762.30   1
  -2  -7 -17  505.82 399.549   1
  -2  -7 -17  328.39 337.326   1
   2   7  17  210.78 184.829   1
   2   7  17  333.87 356.552   1
  -2  -7 -18  387.91 399.549  -1
  -2  -7 -18 -235.04 319.226   1
   2   7  18  678.18 364.551   1
   2   7  18  213.59 176.042   1
  -2  -7 -19 1005.63 477.656   1
  -2  -7 -19  319.38 348.817   1
   2   7  19  850.92 386.406   1
   2   7  19  152.87 175.066   1
  -2  -7 -20  22058. 1215.55   1
   2   7  20  24142. 988.734   1
  -2  -7 -21 1242.21 470.522   1
   2   7  21 1604.58 238.265   1
  -2  -7 -23  387.53 366.766   1
   2   7  23  227.11 170.785   1
  -2  -7 -24  247.73 422.831   1
   2   7  24   45.29 146.864   1
  -2  -7 -25 -202.14 380.022   1
   2   7  25   45.25 150.244   1
   2   7  25  599.70 404.806   1
  -2  -7 -26  10894. 907.998   1
   2   7  26  10383. 817.498   1
   2   7  26  11829. 597.821   1
  -2  -7 -27  893.73 424.333   1
   2   7  27 1387.16 426.586   1
   2   7  27 1164.10 223.056   1
  -2  -7 -28 8869.69 804.731   1
   2   7  28  10973. 564.025   1
   2   7  29 1170.48 227.075  -1
   2  -8 -28 6721.74 740.517   1
  -2   8  28 8242.58 515.583   1
   2  -8 -27  111.94 366.278   1
  -2   8  27  175.89 178.595   1
   2  -8 -26 4806.60 606.834   1
  -2   8  26 4968.08 378.145  -1
   2  -8 -25 5137.06 643.634   1
  -2   8  25 5272.24 383.402   1
   2  -8 -24  553.89 391.288   1
  -2   8  24  235.45 178.595   1
   2  -8 -23 5399.92 611.340   1
  -2   8  23 6241.08 416.447   1
   2  -8 -22 7221.17 704.092   1
  -2   8  22 9534.35 528.351   1
   2  -8 -21 2885.46 698.084   1
  -2   8  21 3867.81 599.323   1
   2  -8 -20  12058. 1042.06   1
   2  -8 -20  11078. 820.878   1
  -2   8  20  12880. 920.765   1
  -2   8  20  12388. 631.993   1
   2  -8 -19  11536. 834.021  -1
   2  -8 -19  11025. 995.117   1
  -2   8  19  12137. 622.605   1
  -2   8  19  11949. 873.826   1
   2  -8 -18  285.69 471.273   1
   2  -8 -18  975.21 396.169   1
  -2   8  18 1185.88 227.488   1
  -2   8  18 1078.11 455.501  -1
   2  -8 -17 2325.57 468.268   1
  -2   8  17 3260.98 319.226   1
   2  -8 -16  21735. 1346.60   1
   2  -8 -16  21419. 1146.83   1
  -2   8  16  22914. 967.329   1
  -2   8  16  23650. 1254.60   1
   2  -8 -15 1277.88 503.942   1
  -2   8  15  667.67 399.549   1
   2  -8 -14  14491. 1057.08   1
   2  -8 -14  11904. 809.612   1
  -2   8  14  12760. 888.095   1
  -2   8  14  12824. 657.529   1
   2  -8 -13 8377.76 812.241   1
   2  -8 -13 7277.50 642.132   1
  -2   8  13 8242.58 710.101   1
  -2   8  13 7908.37 499.061   1
   2  -8 -12 2564.02 591.438   1
   2  -8 -12 3369.88 473.150  -1
  -2   8  12 3822.75 352.835   1
  -2   8  12 3693.95 542.245   1
   2  -8 -11 3618.47 478.783   1
   2  -8 -11 5497.55 698.084   1
  -2   8  11 4100.63 538.490   1
  -2   8  11 4070.59 358.017  -1
   2  -8 -10  49793. 1986.85   1
  -2   8  10  53811. 1930.90   1
  -2   8   9 2511.45 292.039   1
  -2   8   9 2008.64 422.455  -1
   2  -8  -8  898.99 470.146   1
   2  -8  -8 1248.97 356.327   1
  -2  -8   8  952.31 166.579   1
  -2  -8   8  827.26 181.186   1
   2   8  -8 1246.34 186.819   1
   2   8  -8 1162.60 118.625   1
  -2   8   8 1512.95 251.108   1
  -2   8   8 1095.38 358.993   1
   2  -8  -7  48930. 2082.61   1
  -2  -8   7  46113. 1578.67   1
   2   8  -7  48141. 1580.92   1
  -2   8   7  48254. 1951.56   1
   2  -8  -6 7104.76 699.962   1
  -2  -8   6 7810.73 437.476   1
  -2  -8   6 9106.26 500.563   1
   2   8  -6  10886. 460.758   1
   2   8  -6  10755. 538.865   1
  -2   8   6  10053. 713.856   1
  -2   8   6  10368. 556.139   1
   2  -8  -5  864.44 337.401   1
   2  -8  -5 1631.62 455.501   1
  -2  -8   5  748.40 261.209   1
  -2  -8   5 1093.88 268.719   1
   2   8  -5  712.35 164.251   1
   2   8  -5  678.56 247.578   1
  -2   8   5  878.33 328.051   1
  -2   8   5  561.02 207.698   1
   2  -8  -4  54938. 2083.36   1
   2  -8  -4  51033. 2088.62   1
  -2  -8   4  53624. 1909.87   1
  -2  -8   4  56327. 2001.50   1
   2   8  -4  60946. 2040.93   1
   2   8  -4  58693. 2058.95   1
  -2   8   4  58092. 2226.43   1
  -2   8   4  61434. 2129.18   1
   2  -8  -3 2063.08 371.873   1
  -2  -8   3 1890.72 344.836   1
  -2  -8   3 1408.18 314.082   1
   2   8  -3 1538.49 219.376   1
   2   8  -3 1951.18 322.268   1
  -2   8   3 1875.33 248.854   1
  -2   8   3 1769.06 389.035   1
   2  -8  -2 9812.23 620.728   1
  -2  -8   2 9556.88 606.458   1
  -2  -8   2  10176. 628.989   1
   2   8  -2  10338. 610.589   1
   2   8  -2  11040. 527.224   1
  -2   8   2  10849. 710.476   1
  -2   8   2  10717. 538.490   1
   2  -8  -1  44912. 1715.36   1
  -2  -8   1  44499. 1720.61   1
  -2  -8   1  43447. 1683.44   1
   2   8  -1  46339. 1746.52   1
   2   8  -1  46264. 1628.24   1
  -2   8   1  43710. 1738.64   1
  -2   8   1  46902. 1651.14   1
   2  -8   0  21787. 994.742   1
  -2  -8   0  22952. 1063.46   1
  -2  -8   0  20593. 1011.26   1
   2   8   0  26962. 1044.69   1
   2   8   0  24506. 1101.76   1
  -2   8   0  26294. 1006.01   1
   2  -8   1  466.39 155.952   1
   2  -8   1  355.35 280.999   1
  -2  -8  -1  336.91 355.876   1
  -2  -8  -1  349.57 295.005   1
   2   8   1  519.71 346.338   1
   2   8   1  455.50 179.872   1
  -2   8  -1  303.42 279.872   1
  -2   8  -1  196.66 164.776   1
   2  -8   2  69658. 2428.09   1
  -2  -8  -2  71235. 2586.93   1
  -2  -8  -2  66804. 2471.65   1
   2   8   2  77356. 2764.92   1
   2   8   2  82125. 2761.17   1
  -2   8  -2  81299. 2683.44   1
  -2   8  -2  77093. 2726.62   1
   2  -8   3  25588. 960.194   1
  -2  -8  -3  22970. 1125.80   1
  -2  -8  -3  24221. 1142.32   1
   2   8   3  23305. 1100.64   1
   2   8   3  26680. 1053.32   1
  -2   8  -3  25809. 1124.29   1
   2  -8   4  558.77 157.266   1
   2  -8   4  299.14 252.610   1
  -2  -8  -4  609.84 343.597   1
  -2  -8  -4  856.55 357.529   1
   2   8   4  566.28 197.634   1
   2   8   4   79.08 299.887   1
  -2   8  -4  446.49 155.689   1
  -2   8  -4  187.12 263.424   1
   2  -8   5  24168. 979.721   1
  -2  -8  -5  24300. 1205.03   1
  -2  -8  -5  21679. 1087.87   1
   2   8   5  23143. 954.937   1
   2   8   5  23684. 1137.81   1
  -2   8  -5  24273. 880.585   1
  -2   8  -5  23233. 1000.00   1
   2  -8   6  36444. 1325.20   1
  -2  -8  -6  37165. 1615.09   1
   2   8   6  43335. 1758.17   1
  -2   8  -6  41607. 1553.89   1
  -2   8  -6  43823. 1466.01   1
   2  -8   7  141.83 255.614   1
  -2  -8  -7   27.00 338.115   1
  -2  -8  -7  175.10 368.982   1
   2   8   7  282.69 180.248   1
   2   8   7    4.01 313.218   1
  -2   8  -7  130.98 140.481   1
  -2   8  -7   70.03 237.138   1
   2  -8   8  30897. 1109.65   1
   2  -8   8  30627. 1238.83  -1
  -2  -8  -8  30060. 1429.59   1
  -2  -8  -8  32054. 1456.25   1
   2   8   8  36714. 1389.78   1
   2   8   8  37033. 1584.30   1
  -2   8  -8  34273. 1273.37   1
  -2   8  -8  35539. 1199.77   1
   2  -8   9  19944. 753.661   1
  -2  -8  -9  20120. 1099.89   1
   2   8   9  21344. 910.626   1
  -2   8  -9  20345. 740.517   1
   2  -8  10 1237.70 189.335   1
   2  -8  10 1126.17 285.430   1
  -2  -8 -10  861.43 399.549   1
  -2  -8 -10  705.59 377.394   1
   2   8  10 1877.58 418.325  -1
   2   8  10 1579.80 249.192   1
  -2   8 -10 1500.19 209.989   1
  -2   8 -10 1404.43 203.004   1
  -2  -8 -11 6365.00 616.973   1
  -2  -8 -11 7341.34 697.333   1
   2   8  11 6143.44 419.076   1
   2   8  11 5625.23 583.552   1
  -2  -8 -12  49606. 2091.25   1
  -2  -8 -12  50995. 2081.49   1
   2   8  12  56703. 2236.95   1
   2   8  12  55651. 1985.35   1
  -2  -8 -13  596.69 392.790  -1
  -2  -8 -13  680.06 416.447   1
  -2  -8 -14 4434.84 627.487   1
   2   8  14 6015.77 627.863   1
  -2  -8 -15  13684. 926.773   1
  -2  -8 -15  16688. 1075.10   1
   2   8  15  16177. 753.285   1
   2   8  15  15884. 982.725  -1
  -2  -8 -16 2037.55 471.273   1
   2   8  16 2553.88 290.649   1
  -2  -8 -17 3119.79 516.710   1
  -2  -8 -17 3508.82 621.479   1
   2   8  17 2776.94 517.461   1
   2   8  17 2956.44 304.393   1
  -2  -8 -18  27788. 1390.16   1
  -2  -8 -18  28404. 1482.16   1
   2   8  18  30676. 1206.53   1
   2   8  18  31134. 1472.77   1
  -2  -8 -19 -437.85 361.134   1
  -2  -8 -19 -206.27 436.725   1
   2   8  19  138.23 164.326   1
   2   8  19  119.75 361.847   1
  -2  -8 -20 4175.74 696.958   1
   2   8  20 6060.83 628.989  -1
  -2  -8 -21 5031.91 733.007   1
  -2  -8 -21 5429.96 650.394   1
   2   8  21 5362.37 378.520  -1
  -2  -8 -22 2907.24 530.604   1
   2   8  22 3580.17 314.532   1
  -2  -8 -23  975.21 440.856   1
   2   8  23  964.70 204.281   1
  -2  -8 -24  12253. 935.786   1
   2   8  24  14427. 690.198   1
  -2  -8 -25  -17.46 357.717   1
   2   8  25  226.51 172.249   1
  -2  -8 -26 1225.68 463.011   1
   2   8  26 1119.79 218.776   1
  -2  -8 -27 4611.34 678.933   1
   2   8  27 4735.26 395.794   1
   2  -9 -26  151.86 446.488   1
  -2   9  26 -117.05 185.618   1
   2  -9 -25  387.91 388.284   1
  -2   9  25 1056.70 244.686   1
   2  -9 -24 3701.84 532.106   1
  -2   9  24 4479.91 377.394  -1
   2  -9 -23 3762.67 796.469   1
   2  -9 -23 3916.63 568.531   1
  -2   9  23 4810.36 393.541   1
   2  -9 -22  885.47 379.647   1
   2  -9 -22  247.28 568.907   1
  -2   9  22  626.74 207.811   1
   2  -9 -21  23620. 1570.78   1
   2  -9 -21  21911. 1184.00   1
  -2   9  21  22719. 944.423   1
   2  -9 -20  350.69 551.257   1
   2  -9 -20 1154.71 408.561   1
  -2   9  20 1100.64 232.670   1
   2  -9 -19 -668.79 503.567   1
   2  -9 -19 -234.36 377.769   1
  -2   9  19  107.47 175.591   1
  -2   9  19  171.99 429.590   1
   2  -9 -18 5816.74 832.143   1
   2  -9 -18 7626.73 689.823   1
  -2   9  18 7469.01 470.522   1
  -2   9  18 7596.69 751.783   1
   2  -9 -17 9932.40 977.468  -1
   2  -9 -17 9447.98 759.293   1
  -2   9  17  13060. 985.729   1
   2  -9 -16 -141.38 337.702   1
   2  -9 -16    1.68 462.260   1
  -2   9  16  549.00 393.541   1
  -2   9  16   62.60 175.929   1
   2  -9 -15  11866. 823.882   1
  -2   9  15  14356. 699.586   1
   2  -9 -14 2016.52 570.409   1
   2  -9 -14 2616.60 481.411   1
  -2   9  14 3819.00 561.396   1
  -2   9  14 3680.43 346.000   1
  -2   9  13   89.49 378.896   1
  -2   9  13  -22.77 175.479   1
   2  -9 -12  13868. 1066.84   1
   2  -9 -12  15024. 1031.54   1
  -2   9  12  18870. 892.602   1
  -2   9  12  16617. 1015.02   1
   2  -9 -11  17484. 1002.63   1
   2  -9 -11  19959. 1261.36   1
   2  -9 -10  460.38 374.990   1
   2  -9 -10  722.49 506.571   1
  -2   9  10  759.29 374.389   1
  -2   9  10  297.11 201.051   1
   2  -9  -9  23038. 1364.63   1
   2  -9  -9  19850. 1062.71   1
  -2   9   9  21280. 1137.44   1
  -2   9   9  22381. 944.798   1
   2  -9  -8 7589.18 820.502   1
   2  -9  -8 8058.57 656.402   1
  -2  -9   8 7514.07 378.896   1
  -2  -9   8 7893.35 422.831   1
   2   9  -8  10330. 467.142   1
   2   9  -8 9733.38 382.275   1
  -2   9   8 8422.82 709.350   1
  -2   9   8 9410.43 529.478   1
   2  -9  -7  238.08 347.878   1
  -2  -9   7  450.24 243.672   1
  -2  -9   7   80.17 239.467   1
   2   9  -7  400.68 140.067   1
   2   9  -7  716.86 253.774   1
  -2   9   7  838.90 219.639   1
   2  -9  -6 7131.05 615.846   1
   2  -9  -6 4765.30 684.566   1
  -2  -9   6 5970.70 446.488   1
  -2  -9   6 5437.47 408.561   1
   2   9  -6 6954.56 362.260   1
   2   9  -6 6770.55 460.007   1
  -2   9   6 7352.60 659.782   1
  -2   9   6 6962.07 448.742   1
   2  -9  -5  34480. 1494.93   1
   2  -9  -5  35242. 1705.22   1
  -2  -9   5  34540. 1343.22   1
  -2  -9   5  36140. 1400.67   1
   2   9  -5  36699. 1395.79   1
   2   9  -5  38002. 1332.71   1
  -2   9   5  38490. 1437.85   1
  -2   9   5  38828. 1675.55   1
   2  -9  -4  782.95 465.640   1
  -2  -9   4  550.88 298.798   1
   2   9  -4  424.71 284.791   1
  -2   9   4  288.43 339.917  -1
   2  -9  -3  22670. 1276.75   1
   2  -9  -3  21848. 1072.10  -1
  -2  -9   3  21630. 996.995   1
  -2  -9   3  22730. 1039.80   1
   2   9  -3  24097. 1066.47   1
   2   9  -3  25595. 983.101   1
  -2   9   3  25306. 1015.77   1
  -2   9   3  25407. 1226.44   1
   2  -9  -2 9125.04 655.651   1
   2  -9  -2 7972.20 765.302   1
  -2  -9   2  10338. 662.035   1
  -2  -9   2 9722.11 684.566   1
   2   9  -2  11870. 708.223   1
   2   9  -2  12869. 595.568   1
  -2   9   2  13196. 629.365   1
  -2   9   2  11220. 757.791   1
   2  -9  -1 2696.20 426.962   1
   2  -9  -1 3800.22 599.699   1
  -2  -9   1 2060.83 472.024   1
  -2  -9   1 2860.68 411.941   1
   2   9  -1 2985.73 284.228   1
  -2   9   1 3058.58 295.831   1
  -2   9   1 3364.25 478.032   1
   2  -9   0  887.72 336.875   1
   2  -9   0  644.76 453.623   1
  -2  -9   0  971.46 344.235   1
  -2  -9   0  643.63 370.935   1
   2   9   0 1642.88 231.881   1
   2   9   0 1565.90 373.939   1
  -2   9   0 1969.96 241.832   1
  -2   9   0 1736.39 392.790   1
   2  -9   1  41457. 1612.47   1
   2  -9   1  44198. 1888.85   1
  -2  -9  -1  41495. 1698.83   1
  -2  -9  -1  42246. 1759.67   1
   2   9   1  43785. 1753.66   1
   2   9   1  46602. 1668.79   1
  -2   9  -1  48479. 1690.57   1
  -2   9  -1  44348. 1780.70   1
   2  -9   2  168.34 303.792   1
  -2  -9  -2  330.79 377.018   1
  -2  -9  -2  100.83 336.500   1
   2   9   2  -66.58 318.926   1
   2   9   2  -18.26 169.320   1
  -2   9  -2   -6.27 168.607   1
   2  -9   3  22967. 1189.26   1
   2  -9   3  20308. 939.917   1
  -2  -9  -3  20811. 1064.21   1
  -2  -9  -3  22591. 1171.61   1
   2   9   3  21607. 907.998   1
   2   9   3  21664. 1082.24   1
  -2   9  -3  23312. 1090.87   1
  -2   9  -3  22523. 870.822   1
   2  -9   4  19707. 1076.60   1
   2  -9   4  20770. 921.892   1
  -2  -9  -4  19527. 1084.49   1
   2   9   4  24915. 1206.91   1
  -2   9  -4  23395. 1072.47   1
  -2   9  -4  25013. 933.533   1
   2  -9   5 7653.02 672.174   1
  -2  -9  -5 6856.92 664.663  -1
  -2  -9  -5 7465.26 657.904   1
   2   9   5 8069.84 656.402   1
   2   9   5 8899.73 516.710   1
  -2   9  -5 8377.76 594.817   1
   2  -9   6 1106.27 331.055   1
   2  -9   6  902.74 407.810   1
  -2  -9  -6  662.41 419.451   1
  -2  -9  -6 1009.39 376.643   1
   2   9   6 1880.96 264.701  -1
   2   9   6 1240.70 416.447   1
  -2   9  -6 1546.00 332.782   1
  -2   9  -6 1716.86 208.073   1
   2  -9   7  41419. 1491.92   1
   2  -9   7  42921. 1707.10   1
  -2  -9  -7  40556. 1733.76   1
   2   9   7  44611. 1639.88   1
  -2   9  -7  47127. 1575.67   1
  -2   9  -7  45437. 1687.94   1
   2  -9   8 1792.71 334.735   1
   2  -9   8 1720.24 439.729   1
  -2  -9  -8 2380.40 535.486   1
  -2  -9  -8 2349.23 459.256   1
   2   9   8 2291.02 455.876   1
   2   9   8 2544.12 292.076   1
  -2   9  -8 2733.01 342.996   1
  -2   9  -8 2855.05 247.090   1
   2  -9   9 1226.44 279.421   1
  -2  -9  -9 1503.57 414.570   1
  -2  -9  -9 1180.62 476.154   1
   2   9   9 1269.62 245.137   1
   2   9   9 1101.76 395.794   1
  -2   9  -9  861.06 226.999   1
   2  -9  10 9260.22 491.175   1
   2  -9  10  10023. 437.476   1
  -2  -9 -10 9763.42 837.776   1
  -2  -9 -10  11187. 814.119   1
   2   9  10  13391. 661.284   1
   2   9  10  11923. 817.123   1
  -2   9 -10  12610. 545.625   1
  -2   9 -10  13090. 533.984   1
  -2  -9 -11 9233.94 797.596   1
  -2  -9 -11 9969.95 783.326   1
   2   9  11  11506. 602.703   1
   2   9  11 9992.48 761.922   1
  -2  -9 -12 -246.64 375.516   1
  -2  -9 -12  -14.76 363.837   1
   2   9  12  194.82 191.476   1
   2   9  12 -238.30 344.423   1
  -2  -9 -13  29328. 1425.08   1
  -2  -9 -13  29730. 1525.35   1
   2   9  13  33958. 1311.68   1
   2   9  13  33515. 1549.75   1
   2   9  14  734.51 211.415   1
  -2  -9 -15  489.30 371.498   1
  -2  -9 -15  235.07 434.848   1
   2   9  15  -13.43 158.580   1
   2   9  15 -105.82 359.744   1
  -2  -9 -16  14251. 946.676   1
  -2  -9 -16  12174. 993.615   1
   2   9  16  14600. 702.966   1
   2   9  16  14855. 947.802   1
  -2  -9 -17 2658.28 653.773   1
  -2  -9 -17 3469.02 537.363   1
   2   9  17 3561.02 346.226   1
   2   9  17 2692.07 559.894   1
  -2  -9 -18 -146.11 387.908   1
  -2  -9 -18  688.70 519.714   1
   2   9  18   77.54 413.819   1
   2   9  18  182.95 185.618   1
  -2  -9 -19  12013. 885.842   1
  -2  -9 -19 9789.70 956.439   1
   2   9  19  12298. 627.863   1
  -2  -9 -20 1999.62 621.854   1
  -2  -9 -20 2315.06 500.938   1
   2   9  20 2499.81 274.427  -1
  -2  -9 -21  724.75 525.347   1
  -2  -9 -21  794.59 384.904   1
   2   9  21  726.25 209.951   1
  -2  -9 -22 1894.48 544.498   1
  -2  -9 -22 1666.92 576.793   1
   2   9  22 2943.29 355.313   1
  -2  -9 -23 3762.67 716.484   1
  -2  -9 -23 4119.41 573.788   1
   2   9  23 5610.21 411.941   1
  -2  -9 -24  292.68 347.991   1
   2   9  24  288.58 192.903   1
  -2  -9 -25 5054.45 671.423   1
   2   9  25 5591.43 429.966   1
   2 -10 -24 -174.95 378.145  -1
  -2  10  24   18.81 220.428   1
   2 -10 -23 5741.64 634.997   1
  -2  10  23 8475.40 529.853   1
   2 -10 -22   23.60 371.573   1
   2 -10 -22   70.93 616.973   1
  -2  10  22  -50.39 180.398   1
   2 -10 -21  365.08 589.560   1
   2 -10 -20 -185.24 352.872   1
   2 -10 -20  -37.93 594.066   1
  -2  10  20  -43.26 180.848   1
   2 -10 -19  13293. 1208.03  -1
   2 -10 -19  13804. 935.786   1
  -2  10  19  15873. 743.146   1
  -2  10  18  534.36 206.534   1
   2 -10 -17 5749.15 837.025   1
   2 -10 -17 5444.98 617.348   1
  -2  10  17 6733.00 448.742   1
   2 -10 -16 -774.69 546.376   1
  -2  10  16 -476.91 401.427   1
   2 -10 -15 3233.94 681.186   1
   2 -10 -15 4566.27 577.544   1
  -2  10  15 5227.18 397.296   1
  -2  10  15 4412.31 611.340   1
   2 -10 -14 -181.71 499.061   1
   2 -10 -14  363.72 386.406   1
  -2  10  14  127.75 191.138   1
  -2  10  14  364.63 395.418   1
   2 -10 -13  18566. 1291.78   1
   2 -10 -13  19317. 1095.38   1
  -2  10  13  21472. 918.888   1
  -2  10  13  21066. 1188.51   1
   2 -10 -12    4.92 371.310   1
  -2  10  12    7.83 179.084   1
   2 -10 -11 8689.44 739.766   1
   2 -10 -11 7975.96 899.736   1
  -2  10  11 8129.92 726.999   1
  -2  10  11 9057.45 538.114   1
   2 -10 -10  904.62 562.147   1
  -2  10  10  836.27 401.802   1
   2 -10  -9 7972.20 717.987   1
   2 -10  -9 8058.57 887.720   1
  -2  10   9  10522. 583.927   1
  -2  10   9 9196.39 769.057  -1
   2 -10  -8  736.01 538.490   1
   2 -10  -8  513.33 378.145   1
  -2 -10   8  513.33 295.381   1
   2  10  -8  519.34 142.358  -1
  -2  10   8  854.30 398.047   1
  -2  10   8  411.94 213.669   1
   2 -10  -7  25111. 1236.57   1
   2 -10  -7  27199. 1533.23   1
  -2 -10   7  26001. 1058.96   1
  -2 -10   7  25028. 1010.51   1
   2  10  -7  31089. 1188.88   1
   2  10  -7  30646. 1068.72   1
  -2  10   7  30458. 1465.26   1
  -2  10   7  31018. 1220.05   1
   2 -10  -6 2072.10 437.852   1
   2 -10  -6 3474.27 702.215   1
  -2 -10   6 2992.49 377.018   1
  -2 -10   6 2328.20 383.026   1
   2  10  -6 2779.19 390.912  -1
   2  10  -6 2257.98 239.204   1
  -2  10   6 2233.57 289.035   1
  -2  10   6 3025.91 527.600   1
   2 -10  -5  553.51 379.647   1
  -2 -10   5  645.51 342.846   1
  -2  10   5  757.79 220.878   1
   2 -10  -4 1235.07 394.292   1
   2 -10  -4 1402.93 593.315   1
  -2 -10   4 1289.90 387.908   1
  -2 -10   4  512.95 356.290   1
   2  10  -4 1167.48 379.271   1
   2  10  -4 1204.28 234.097   1
  -2  10   4 1075.85 431.092   1
  -2  10   4 1165.23 240.781   1
   2 -10  -3 7983.47 849.793   1
   2 -10  -3 8133.68 670.672   1
  -2 -10   3 8404.05 613.218   1
   2  10  -3  10612. 536.237   1
  -2  10   3  10890. 576.417   1
  -2  10   3 9478.02 757.040   1
   2 -10  -2 1573.04 554.262   1
  -2 -10   2  194.74 341.306   1
  -2 -10   2  648.14 393.165   1
   2  10  -2  326.17 196.432   1
   2  10  -2  383.78 347.089   1
  -2  10   2  328.61 388.284   1
   2 -10  -1  57567. 2195.27   1
   2 -10  -1  56515. 2387.91   1
  -2 -10   1  54037. 2133.68   1
  -2 -10   1  58055. 2221.18   1
   2  10  -1  68269. 2336.08   1
   2  10  -1  65640. 2446.86   1
  -2  10   1  66279. 2280.88   1
  -2  10   1  64176. 2469.77   1
   2 -10   0  865.19 377.394   1
   2 -10   0 1288.77 533.233   1
  -2 -10   0  809.99 381.900   1
  -2 -10   0  695.83 411.190   1
   2  10   0  553.89 209.162   1
   2  10   0  699.59 365.490   1
  -2  10   0  466.02 361.397   1
  -2  10   0  583.55 208.824   1
   2 -10   1 1671.42 416.823   1
   2 -10   1 2217.42 585.429   1
  -2 -10  -1 1041.31 452.872   1
  -2 -10  -1 1395.42 395.043   1
   2  10   1 1581.30 408.561   1
   2  10   1 1420.58 248.817  -1
  -2  10  -1 1731.50 249.268   1
  -2  10  -1 1776.57 421.329  -1
   2 -10   2  892.60 380.398   1
   2 -10   2  170.26 468.268   1
  -2 -10  -2  467.14 454.750   1
   2  10   2 1405.56 415.321   1
  -2  10  -2 1054.45 217.649   1
  -2  10  -2 1219.68 411.941   1
   2 -10   3  38077. 1754.79   1
   2 -10   3  36985. 1493.80  -1
  -2 -10  -3  35246. 1645.14   1
  -2 -10  -3  34562. 1552.38   1
   2  10   3  40781. 1727.75   1
   2  10   3  42696. 1575.29   1
  -2  10  -3  41832. 1721.74   1
  -2  10  -3  44311. 1555.01   1
   2 -10   4  292.68 346.301   1
  -2 -10  -4   -8.04 354.074   1
  -2 -10  -4  -32.44 426.211   1
   2  10   4  250.02 370.371   1
   2  10   4  182.46 191.063   1
  -2  10  -4 -227.86 320.616   1
  -2  10  -4  166.32 177.431   1
   2 -10   5  32910. 1526.10   1
   2 -10   5  32520. 1327.45   1
  -2 -10  -5  31660. 1560.64   1
  -2 -10  -5  31772. 1474.28   1
   2  10   5  37071. 1401.05   1
   2  10   5  36410. 1618.10   1
  -2  10  -5  37777. 1597.44   1
   2 -10   6  230.75 440.856   1
  -2 -10  -6   32.85 340.293   1
  -2 -10  -6  -41.16 467.142   1
   2  10   6  179.42 390.912   1
   2  10   6  122.79 183.928   1
  -2  10  -6  -15.30 329.290   1
   2 -10   7  234.43 366.316   1
   2 -10   7 -675.18 396.920   1
  -2 -10  -7  101.13 458.505   1
  -2 -10  -7   82.16 356.965   1
   2  10   7   41.19 365.565   1
   2  10   7  135.26 185.542   1
  -2  10  -7   58.47 317.198   1
  -2  10  -7 -232.71 176.943   1
   2 -10   8   57.45 354.788   1
   2 -10   8  -37.08 422.455   1
  -2 -10  -8  -47.54 363.650   1
  -2 -10  -8  -32.44 455.501   1
   2  10   8  101.24 183.928   1
   2  10   8 -182.65 358.655   1
  -2  10  -8  211.00 198.348   1
  -2  10  -8  331.69 300.450   1
   2 -10   9  24149. 938.039   1
  -2 -10  -9  24450. 1387.91   1
   2  10   9  25734. 1300.79   1
  -2  10  -9  28400. 1025.53   1
   2 -10  10  -45.47 246.001   1
   2 -10  10   -0.39 205.295   1
  -2 -10 -10  381.52 500.563   1
  -2 -10 -10  378.90 384.153   1
   2  10  10 -123.88 176.868   1
   2  10  10  427.34 375.516   1
  -2  10 -10  -38.53 188.922   1
  -2 -10 -11 6789.33 672.549   1
  -2 -10 -11 6751.78 843.784   1
   2  10  11 7773.18 709.725   1
   2  10  11 7863.30 492.301   1
  -2 -10 -12   -8.38 371.911   1
  -2 -10 -12 -355.99 506.947   1
   2  10  12 -121.74 389.410   1
   2  10  12   50.21 183.590   1
  -2 -10 -13  354.37 400.676   1
  -2 -10 -13 1414.19 550.131   1
   2  10  13  933.16 235.073   1
   2  10  13  900.86 422.080  -1
  -2 -10 -14  104.06 461.885   1
  -2 -10 -14  253.44 384.153   1
   2  10  14  268.49 379.271   1
   2  10  14  -13.10 170.334   1
  -2 -10 -15 5264.73 762.673   1
   2  10  15 7382.64 705.219   1
  -2 -10 -16  209.16 503.191   1
  -2 -10 -16 1103.64 419.827   1
   2  10  16  701.09 217.536  -1
  -2 -10 -17 4637.62 599.323   1
   2  10  17 5921.89 419.076   1
  -2 -10 -18  534.36 396.920   1
  -2 -10 -18   16.28 530.229   1
   2  10  18  754.04 212.279   1
   2  10  19 1021.03 232.369   1
  -2 -10 -20   17.09 515.583   1
  -2 -10 -21 8865.93 770.559   1
   2  10  21  11491. 619.601   1
  -2 -10 -22  900.49 376.267   1
  -2 -10 -23 2554.26 488.922   1
   2  10  23 3905.37 378.145   1
   2 -11 -21 6811.86 714.982   1
  -2  11  21  10533. 610.213  -1
   2 -11 -20 3214.04 544.498   1
  -2  11  20 3181.75 354.112   1
   2 -11 -19 -106.95 593.691   1
   2 -11 -19  -99.92 360.157   1
  -2  11  19  162.07 208.937   1
   2 -11 -18 -273.94 600.075   1
   2 -11 -18 -252.72 358.392   1
  -2  11  18 -119.23 194.780   1
   2 -11 -17 3341.34 775.440   1
   2 -11 -17 4059.33 551.257   1
  -2  11  17 6796.84 462.260   1
   2 -11 -16 -112.28 591.438   1
   2 -11 -16   34.84 365.715   1
  -2  11  16  131.99 185.392   1
   2 -11 -15 5940.66 648.516   1
  -2  11  15 7897.10 502.065   1
   2 -11 -14 2653.02 728.877   1
   2 -11 -14 2116.78 471.648   1
  -2  11  14 2524.59 322.643   1
  -2  11  14 2457.38 567.405   1
   2 -11 -13 1167.85 668.794   1
   2 -11 -13   85.69 426.211   1
  -2  11  13  279.61 416.072   1
  -2  11  13  659.78 243.297   1
   2 -11 -12 1616.97 469.395   1
   2 -11 -12 1330.08 675.178   1
  -2  11  12 1485.54 278.670   1
  -2  11  12 1345.47 463.387   1
   2 -11 -11 7018.39 692.076   1
   2 -11 -11 7525.34 934.284   1
  -2  11  11 8400.29 520.841   1
  -2  11  11 9647.00 829.139   1
   2 -11 -10    4.28 551.257   1
   2 -11 -10 -296.92 358.167   1
  -2  11  10  366.02 223.695   1
  -2  11  10  488.92 458.129   1
   2 -11  -9 6920.76 1013.89   1
   2 -11  -9 9166.34 769.808   1
  -2  11   9  12212. 638.753   1
  -2  11   9  12163. 939.917   1
   2 -11  -8 1227.19 663.912   1
   2 -11  -8  660.16 394.667  -1
  -2 -11   8 1610.96 367.480   1
   2  11  -8  635.75 162.110   1
  -2  11   8  895.98 248.554   1
  -2  11   8  881.34 435.974   1
   2 -11  -7  261.10 543.747   1
  -2 -11   7 -256.55 335.524   1
  -2 -11   7  -41.27 340.631   1
   2  11  -7  245.06 381.524   1
   2  11  -7 -105.33 164.664   1
  -2  11   7  301.91 396.920   1
   2 -11  -6 2904.62 740.517   1
   2 -11  -6 3019.90 517.086   1
  -2 -11   6 3637.25 487.795   1
   2  11  -6 3728.12 502.440   1
  -2  11   6 4310.92 608.336   1
  -2  11   6 4048.06 365.903   1
   2 -11  -5  11386. 824.633   1
   2 -11  -5  10165. 1007.13   1
  -2 -11   5  12201. 779.196   1
  -2 -11   5  12125. 754.036   1
   2  11  -5  14202. 647.390   1
   2  11  -5  14277. 837.776   1
  -2  11   5  14645. 975.591   1
  -2  11   5  13849. 683.815   1
   2 -11  -4   99.81 394.292   1
   2 -11  -4 -205.07 514.457   1
  -2 -11   4 -287.23 381.149   1
   2  11  -4  223.77 205.670   1
  -2  11   4  -70.15 384.153   1
  -2  11   4 -134.28 190.574   1
   2 -11  -3  21183. 1151.71   1
   2 -11  -3  19170. 1298.16   1
   2  11  -3  25160. 1011.26   1
   2  11  -3  23616. 1158.09   1
  -2  11   3  25302. 1032.67  -1
  -2  11   3  22617. 1240.70   1
   2 -11  -2 6203.52 654.149   1
  -2 -11   2 6488.92 666.541   1
  -2 -11   2 5366.12 615.846   1
   2  11  -2 6875.70 659.782   1
   2  11  -2 6222.30 435.599   1
  -2  11   2 7405.17 471.648   1
   2 -11  -1  302.33 392.414   1
   2 -11  -1   32.32 574.539   1
  -2 -11   1  -50.09 409.312   1
  -2 -11   1  573.04 399.173  -1
   2  11  -1  564.40 230.041   1
   2  11  -1  348.33 408.186   1
  -2  11   1  768.68 451.370   1
  -2  11   1  467.89 207.285   1
   2 -11   0 4374.76 751.407   1
   2 -11   0 4438.60 586.556   1
  -2 -11   0 4506.19 630.867   1
  -2  11   0 4040.55 592.940   1
  -2  11   0 4179.49 399.924   1
   2 -11   1  24243. 1222.30   1
   2 -11   1  25531. 1452.12   1
  -2 -11  -1  25978. 1299.29   1
  -2 -11  -1  24626. 1320.69   1
   2  11   1  29981. 1426.59   1
   2  11   1  32084. 1257.98   1
  -2  11  -1  29512. 1434.85   1
  -2  11  -1  30368. 1181.00   1
   2 -11   2 1031.92 593.691   1
   2 -11   2 1940.67 491.550   1
  -2 -11  -2 1900.11 468.644   1
   2  11   2 1584.30 276.455   1
  -2  11  -2 2027.79 278.558   1
  -2  11  -2 1803.23 492.301   1
  -2 -11  -3  12279. 869.319   1
  -2 -11  -3  12167. 947.051   1
   2  11   3  15667. 744.648   1
   2  11   3  15652. 981.223   1
  -2  11  -3  14611. 930.529   1
  -2  11  -3  16556. 721.742   1
   2 -11   4 1617.35 642.508   1
   2 -11   4 2613.22 553.886   1
  -2 -11  -4 2460.01 599.699   1
  -2 -11  -4 1415.70 442.358   1
   2  11   4 1581.30 267.067   1
   2  11   4 2507.32 504.318   1
  -2  11  -4 1809.24 476.530   1
  -2  11  -4 1547.88 255.764   1
   2 -11   5 6297.40 662.035   1
  -2 -11  -5 5587.68 647.765   1
  -2 -11  -5 5118.28 740.517   1
   2  11   5 7596.69 485.542   1
   2  11   5 6740.51 677.055   1
  -2  11  -5 7131.05 423.582   1
   2 -11   6 1607.96 575.290   1
   2 -11   6 1252.72 476.154   1
  -2 -11  -6  678.18 464.889   1
  -2 -11  -6  898.61 539.616   1
   2  11   6  759.29 430.717   1
   2  11   6 1422.83 259.857   1
  -2  11  -6 1692.83 441.231   1
  -2  11  -6  836.65 242.809   1
   2 -11   7  18299. 1095.76   1
  -2 -11  -7  16692. 1203.90   1
  -2 -11  -7  16658. 1061.58   1
   2  11   7  20815. 941.419   1
   2  11   7  23515. 1271.50   1
  -2  11  -7  22959. 1101.76   1
   2 -11   8 3022.53 584.678   1
   2 -11   8 2278.63 463.387   1
  -2 -11  -8 2517.46 541.494  -1
  -2 -11  -8 2722.49 698.084   1
   2  11   8 3383.02 565.527   1
   2  11   8 3021.40 344.649   1
  -2  11  -8 2859.55 317.236   1
  -2  11  -8 3837.77 480.660   1
   2 -11   9 1488.55 357.003   1
  -2 -11  -9 2553.13 540.743   1
   2  11   9 2427.71 316.898   1
  -2  11  -9 2454.37 334.172   1
  -2 -11 -10 1795.72 613.218   1
  -2 -11 -10 2302.29 497.183  -1
   2  11  10 1936.16 493.428   1
   2  11  10 1285.77 262.673   1
  -2 -11 -11 5313.55 764.175   1
  -2 -11 -11 5797.97 665.790   1
   2  11  11 6075.85 680.435   1
   2  11  11 6132.18 446.864   1
  -2 -11 -12  482.16 577.544   1
  -2 -11 -12  687.19 433.721  -1
   2  11  12 1248.59 453.248   1
   2  11  12  604.58 234.022   1
  -2 -11 -13 5535.11 845.286   1
  -2 -11 -13 4817.87 668.794   1
   2  11  13 8047.31 772.061   1
   2  11  13 7288.77 502.065   1
  -2 -11 -14 3845.28 789.335   1
  -2 -11 -14 4014.27 589.185  -1
   2  11  14 5013.14 407.435   1
  -2 -11 -15  -40.74 535.861   1
  -2 -11 -15  584.30 388.284   1
   2  11  15  274.16 205.445   1
  -2 -11 -16  339.58 376.267   1
  -2 -11 -16  293.50 548.629   1
   2  11  16  483.66 201.164   1
  -2 -11 -17 1360.87 409.312   1
  -2 -11 -17  663.16 548.629   1
   2  11  17 1610.21 275.892   1
  -2 -11 -18   73.30 366.128   1
  -2 -11 -18   19.02 523.845   1
   2  11  18  291.14 186.481   1
  -2 -11 -19 4690.19 616.973   1
   2  11  19 6060.83 460.383   1
  -2 -11 -20  749.53 423.207   1
   2  11  20  885.09 233.233   1
   2 -12 -19  880.21 425.084   1
  -2  12  19 2387.91 371.348   1
   2 -12 -18  948.93 388.284   1
  -2  12  18 1044.31 287.608   1
   2 -12 -17 1509.20 429.590   1
  -2  12  17 1987.23 317.987   1
   2 -12 -16 4964.32 889.597   1
   2 -12 -16 4671.42 595.568   1
  -2  12  16 7934.65 539.992   1
   2 -12 -15  515.21 403.680   1
   2 -12 -15   53.59 622.605   1
  -2  12  15  116.18 214.495   1
   2 -12 -14 1317.31 455.125   1
   2 -12 -14  895.23 703.717  -1
  -2  12  14 1532.48 288.058   1
   2 -12 -13 2291.40 485.167   1
   2 -12 -13 2357.49 761.546   1
  -2  12  13 3116.41 348.667   1
   2 -12 -12 1211.41 734.509   1
   2 -12 -12 1055.58 413.443   1
  -2  12  12  916.26 254.074   1
   2 -12 -11 1167.48 444.611   1
   2 -12 -11 1889.97 782.951   1
  -2  12  11 2373.26 330.529   1
  -2  12  11 1589.56 507.322   1
   2 -12 -10 3357.11 571.160   1
   2 -12 -10 4487.42 879.458   1
  -2  12  10 5178.37 716.484   1
  -2  12  10 6068.34 476.154   1
   2 -12  -9  330.45 664.288   1
   2 -12  -9  924.52 437.852   1
  -2  12   9 1559.14 303.192   1
  -2  12   9 1553.89 504.318   1
   2 -12  -8 2579.42 546.751   1
   2 -12  -8 3711.22 833.646   1
  -2 -12   8 2331.58 450.619   1
   2  12  -8 3050.32 247.615   1
   2  12  -8 4217.04 385.655   1
  -2  12   8 3758.91 379.647   1
  -2  12   8 3227.18 626.736   1
   2 -12  -7 3153.21 557.641   1
   2 -12  -7 2538.11 844.911   1
  -2 -12   7 2397.29 483.289   1
  -2 -12   7 2665.04 556.139   1
   2  12  -7 4889.22 543.747   1
   2  12  -7 4284.64 336.162   1
  -2  12   7 3630.11 728.877   1
  -2  12   7 5152.08 424.333   1
   2 -12  -6 2767.93 552.384   1
   2 -12  -6 2075.10 805.482   1
  -2 -12   6 1862.56 505.820   1
  -2 -12   6 2523.09 555.388   1
   2  12  -6 2631.62 577.544   1
   2  12  -6 2588.43 309.763   1
  -2  12   6 3138.94 647.765   1
  -2  12   6 2149.08 334.960   1
   2 -12  -5 1089.37 741.269   1
   2 -12  -5 1232.82 503.942   1
  -2 -12   5 1490.80 478.783   1
   2  12  -5 1009.01 251.445   1
  -2  12   5  881.71 523.469   1
  -2  12   5 1263.61 290.837   1
   2 -12  -4 3279.38 860.307   1
  -2 -12   4 3114.90 576.042   1
  -2 -12   4 3147.20 572.286  -1
   2  12  -4 2456.63 327.638   1
   2  12  -4 4074.35 663.161   1
  -2  12   4 3980.47 645.512   1
  -2  12   4 2484.04 384.904   1
   2 -12  -3 2266.61 772.812   1
   2 -12  -3 2400.30 564.776   1
  -2 -12   3 2722.49 562.898   1
  -2 -12   3 1930.15 518.963   1
   2  12  -3 2473.52 338.039   1
   2  12  -3 2409.31 592.189   1
  -2  12   3 2236.20 338.791   1
  -2  12   3 2342.47 569.282   1
   2 -12  -2 2491.17 826.135   1
   2 -12  -2 4547.50 647.390   1
  -2 -12   2 2580.92 633.495   1
   2  12  -2 4036.80 635.373   1
  -2  12   2 2733.76 351.445   1
  -2  12   2 3471.65 636.500   1
   2 -12  -1 4938.04 659.782   1
   2 -12  -1 5043.18 891.475   1
  -2 -12   1 5024.40 720.991   1
  -2 -12   1 5016.89 653.398   1
   2  12  -1 5903.11 455.876   1
   2  12  -1 7656.77 804.731   1
  -2  12   1 7983.47 796.094   1
  -2  12   1 7070.97 488.546   1
   2 -12   0 8430.33 772.436   1
  -2 -12   0 7446.48 763.048   1
   2  12   0  10105. 907.247   1
   2  12   0  10161. 591.438   1
  -2  12   0 9984.97 572.662   1
   2 -12   1 2829.14 595.568   1
   2 -12   1 2342.47 774.314   1
  -2 -12  -1 1727.75 539.241   1
  -2 -12  -1 2389.78 606.083   1
   2  12   1 2479.91 338.866   1
   2  12   1 2936.91 593.315   1
  -2  12  -1 3300.41 647.014   1
  -2  12  -1 2382.65 323.995   1
   2 -12   2 7994.73 989.485   1
  -2 -12  -2 8802.09 826.511   1
  -2 -12  -2 9669.54 915.883   1
   2  12   2  11265. 637.251   1
   2  12   2  10897. 907.622   1
  -2  12  -2  12088. 945.925   1
   2 -12   3 1231.32 681.186   1
   2 -12   3 1779.95 554.637   1
   2  12   3 2760.79 592.940   1
   2  12   3 2378.89 346.789  -1
  -2  12  -3 1885.84 309.650   1
  -2  12  -3 2562.90 573.413  -1
   2 -12   4  110.66 565.152   1
   2 -12   4  996.99 659.406   1
  -2 -12  -4  270.86 530.229   1
   2  12   4  341.08 495.681   1
  -2  12  -4 -105.22 514.457   1
  -2  12  -4   29.92 244.423   1
   2 -12   5 5944.42 722.868   1
   2 -12   5 4900.48 855.425   1
  -2 -12  -5 5238.45 697.709   1
  -2 -12  -5 4292.15 780.322   1
   2  12   5 6894.47 515.959   1
   2  12   5 6725.49 785.204   1
  -2  12  -5 6733.00 447.240   1
  -2  12  -5 8111.15 803.229   1
   2 -12   6 6556.51 742.395   1
  -2 -12  -6 5245.96 685.692  -1
  -2  12  -6 8648.13 507.322   1
  -2  12  -6 8772.05 801.351   1
   2 -12   7 1441.61 665.790   1
  -2 -12  -7  534.36 598.197   1
  -2 -12  -7 -588.06 400.676   1
   2  12   7  100.45 222.643   1
   2  12   7  239.99 484.040   1
  -2  12  -7  293.84 475.028   1
   2 -12   8 3373.26 558.017   1
   2 -12   8 4070.59 647.765   1
  -2 -12  -8 3946.67 750.656   1
  -2 -12  -8 3556.14 580.548   1
   2  12   8 3969.20 654.149   1
   2  12   8 4907.99 425.460   1
  -2  12  -8 5865.56 605.332   1
  -2  12  -8 5189.63 463.011   1
   2 -12   9 2440.85 349.643   1
   2 -12   9 3370.63 466.766   1
  -2 -12  -9 3700.71 736.011   1
  -2 -12  -9 3777.69 579.421   1
   2  12   9 4446.11 424.333   1
   2  12   9 4190.76 672.925   1
  -2 -12 -10 1215.17 665.039  -1
   2  12  10 1500.19 544.123   1
  -2 -12 -11 1019.53 422.080   1
  -2 -12 -11  725.87 645.888   1
   2  12  11 1233.19 258.205   1
  -2 -12 -12 1858.05 718.738   1
  -2 -12 -12 1666.54 450.244   1
   2  12  12 2936.53 349.605   1
  -2 -12 -13 -348.44 542.245   1
  -2 -12 -13  175.59 366.729   1
   2  12  13  -67.97 205.144   1
  -2 -12 -14 1585.80 619.601   1
  -2 -12 -14 1789.71 464.513   1
   2  12  14 2203.90 325.197   1
  -2 -12 -15  416.07 549.004   1
  -2 -12 -15  915.51 467.142   1
   2  12  15  870.82 278.483   1
  -2 -12 -16  -60.87 391.288   1
   2  12  16  303.15 213.781   1
  -2 -12 -17 1421.70 453.999   1
   2  12  17 2657.15 354.412   1
  -2 -12 -18 2357.49 497.934  -1
   2  12  18 2509.57 371.085   1
   2 -13 -16  705.97 391.288   1
  -2  13  16  875.33 337.288   1
   2 -13 -15 -406.68 334.172   1
  -2  13  15   16.98 268.006   1
   2 -13 -14 1054.07 411.941   1
   2 -13 -13   71.27 359.519   1
   2 -13 -13 -695.46 669.169   1
  -2  13  13  520.47 267.893   1
   2 -13 -12 4066.84 840.029   1
   2 -13 -12 3439.35 584.678   1
  -2  13  12 6676.67 531.355   1
   2 -13 -11  198.80 395.794   1
   2 -13 -11  761.55 695.831   1
  -2  13  11 1128.43 310.477   1
  -2  13  10   -0.25 275.328  -1
   2 -13  -9   -8.98 401.427   1
   2 -13  -9  176.45 670.672   1
  -2  13   9  205.63 262.185   1
   2 -13  -8 3856.55 881.711   1
   2 -13  -8 2868.19 609.462   1
  -2  13   8 4810.36 503.567   1
  -2  13   8 4491.17 734.509   1
   2 -13  -7  289.67 505.820   1
   2 -13  -7  146.23 733.383   1
  -2 -13   7  -32.20 464.513   1
  -2 -13   7  862.94 607.960   1
  -2  13   7  449.87 279.534   1
  -2  13   7  447.62 477.281   1
   2 -13  -6 6124.67 755.538   1
   2 -13  -6 3612.84 946.676  -1
  -2 -13   6 5873.07 651.145   1
  -2 -13   6 5861.80 819.000   1
   2  13  -6 7104.76 761.171   1
   2  13  -6 6669.16 483.289   1
  -2  13   6 7930.90 855.801   1
  -2  13   6 9102.51 617.348   1
   2 -13  -5  269.92 483.289   1
   2 -13  -5  617.35 713.480   1
  -2 -13   5  458.51 509.200   1
  -2 -13   5  792.34 613.218   1
   2  13  -5  -73.94 276.042   1
   2  13  -5 -266.17 596.319  -1
  -2  13   5  218.40 520.090   1
  -2  13   5  258.20 278.783   1
   2 -13  -4  176.23 491.550   1
  -2 -13   4  632.37 574.915   1
  -2 -13   4  310.81 496.432  -1
   2  13  -4  259.29 308.824   1
   2  13  -4  588.06 625.234   1
  -2  13   4   26.53 285.017   1
   2 -13  -3 -191.02 680.059   1
   2 -13  -3  423.96 514.081   1
  -2 -13   3  399.55 504.693   1
   2  13  -3  970.71 640.255   1
  -2  13   3  910.63 561.772   1
  -2  13   3  510.33 309.763   1
   2 -13  -2 5831.76 1039.43   1
  -2 -13   2 5970.70 811.115   1
  -2 -13   2 7082.23 801.727   1
   2  13  -2  11359. 997.746   1
   2  13  -2 8614.34 622.230   1
  -2  13   2 8651.89 909.875   1
   2 -13  -1 -371.08 543.372   1
   2 -13  -1 -116.56 731.881   1
  -2 -13   1  323.62 509.200   1
  -2 -13   1 -281.79 543.747   1
   2  13  -1  283.51 287.645   1
  -2  13   1 -398.42 525.722  -1
  -2  13   1  162.86 278.332   1
   2 -13   0 4795.34 761.171  -1
   2 -13   0 4408.56 959.443   1
  -2 -13   0 4994.36 809.988   1
  -2 -13   0 4183.25 671.047   1
   2  13   0 7239.95 867.817   1
   2  13   0 6034.54 537.739   1
  -2  13   0 6537.73 534.735   1
  -2  13   0 6612.84 857.303   1
   2 -13   1  114.46 570.033   1
   2 -13   1 -517.84 715.358   1
  -2 -13  -1  346.30 498.685   1
  -2 -13  -1  360.50 647.390   1
   2  13   1  645.14 566.654   1
   2  13   1  360.31 279.008   1
  -2  13  -1  282.95 560.645   1
  -2  13  -1  371.69 295.681   1
   2 -13   2   82.95 623.357   1
  -2 -13  -2 1032.29 630.491   1
   2  13   2  644.39 598.948  -1
  -2  13  -2  335.04 512.579   1
  -2  13  -2  811.49 329.703   1
   2 -13   3 1093.50 849.793   1
   2 -13   3  245.06 671.798   1
  -2 -13  -3 1564.78 641.006   1
  -2 -13  -3  689.45 521.967   1
   2  13   3 1578.67 336.537   1
   2  13   3 1320.31 643.259   1
  -2  13  -3  723.62 624.859   1
  -2  13  -3  925.27 343.071   1
   2 -13   4 8347.72 1029.29  -1
   2 -13   4 6909.49 918.512   1
  -2 -13  -4 5899.36 961.321   1
  -2 -13  -4 7022.15 782.575   1
   2  13   4  11401. 695.080   1
  -2  13  -4  12103. 679.308   1
  -2  13  -4  12415. 1039.05   1
   2 -13   5  340.33 684.190   1
   2 -13   5 1485.17 737.138  -1
  -2 -13  -5 -494.55 575.290  -1
  -2 -13  -5 1055.58 498.685   1
   2  13   5  859.93 294.405   1
   2  13   5 1230.19 630.116   1
  -2  13  -5 1182.88 356.139   1
  -2  13  -5 1370.63 649.267   1
   2 -13   6 1106.27 730.754   1
  -2 -13  -6  795.72 504.318   1
  -2 -13  -6 1707.85 663.912   1
   2  13   6 2695.45 658.280   1
   2  13   6 2181.37 371.498   1
  -2  13  -6 2223.43 399.173   1
   2 -13   7 -105.29 776.192   1
  -2 -13  -7  434.47 532.857   1
   2  13   7  761.92 537.739   1
   2 -13   8 1248.59 624.483   1
   2 -13   8  804.73 549.004   1
  -2 -13  -8 1512.58 553.511   1
  -2 -13  -8 1532.86 612.467   1
   2  13   8 1767.55 376.267   1
  -2 -13  -9  -13.38 449.117   1
   2  13   9   17.12 280.698   1
  -2 -13 -10 5779.19 841.156  -1
  -2 -13 -10 5828.01 769.432   1
   2  13  10  10068. 662.786   1
  -2 -13 -11  -97.97 536.988   1
  -2 -13 -11  494.18 423.207   1
   2  13  11  481.41 279.947   1
  -2 -13 -13  376.27 367.367   1
   2  13  13  290.12 247.728   1
  -2 -13 -14 2588.06 538.490   1
   2  13  14 6150.95 537.363   1
  -2 -13 -15  606.83 460.007   1
   2  13  15  -82.80 246.113   1
  -2  14  13  823.51 391.663   1
   2 -14 -12  395.79 348.742   1
  -2  14  12  425.46 354.975   1
   2 -14 -11  151.97 314.532   1
  -2  14  11  468.64 362.598   1
   2 -14 -10 1097.26 593.315   1
   2 -14 -10 2678.93 493.052   1
  -2  14  10 7806.98 690.198   1
   2 -14  -9  389.41 357.303   1
   2 -14  -9 -309.69 511.453   1
  -2  14   9  244.95 372.474   1
   2 -14  -8  657.53 568.156   1
   2 -14  -8  375.07 341.081   1
  -2  14   8 1243.71 450.244   1
   2 -14  -7  277.51 555.388   1
   2 -14  -7  212.99 406.308   1
  -2  14   7  361.92 378.520  -1
   2 -14  -6  898.61 766.428   1
   2 -14  -6  431.09 408.186   1
  -2  14   6 1022.15 386.030   1
   2 -14  -5 -281.86 798.347   1
   2 -14  -5  478.78 416.072   1
  -2  14   5  -26.74 509.575   1
  -2  14   5 -121.25 328.351   1
   2 -14  -4 5069.47 961.696   1
   2 -14  -4 3337.21 631.993   1
  -2  14   4 7559.14 878.332   1
  -2  14   4 8753.28 674.427   1
   2 -14  -3 -193.62 487.795   1
   2 -14  -3  676.30 746.901   1
  -2  14   3  432.59 375.892   1
  -2  14   3  626.36 640.630   1
   2 -14  -2  458.13 504.693   1
   2 -14  -2  711.60 851.670   1
  -2  14   2 1201.28 419.827   1
  -2  14   2  901.99 705.595   1
   2 -14  -1  486.29 506.196   1
   2 -14  -1  662.41 804.355   1
  -2 -14   1  886.59 556.890   1
  -2 -14   1  120.28 599.699   1
  -2  14   1  580.55 367.217   1
  -2  14   1   46.90 625.985   1
   2 -14   0 1177.62 907.998   1
  -2 -14   0  938.41 670.296   1
  -2  14   0 3251.22 784.077   1
   2 -14   1  656.40 556.139   1
   2 -14   1 -277.09 753.661   1
  -2 -14  -1 -573.41 503.567   1
  -2 -14  -1  486.67 640.630   1
   2  14   1 -292.45 554.637   1
   2  14   1  317.72 327.074   1
   2 -14   2 1931.28 963.574   1
  -2 -14  -2 3609.46 640.630   1
  -2 -14  -2 3338.34 841.156   1
   2  14   2 5760.42 578.670   1
  -2 -14  -3 -107.28 602.328   1
  -2 -14  -3  287.68 449.117   1
   2  14   3  499.44 324.446   1
   2  14   3  383.78 539.241   1
  -2 -14  -4  732.26 455.876   1
  -2 -14  -4  448.74 611.340   1
   2  14   4  236.73 319.789   1
   2  14   4 -173.83 470.897   1
  -2 -14  -5  141.87 383.402   1
  -2 -14  -5 -375.89 585.805  -1
   2  14   5  146.60 349.530   1
   2  14   5 -182.88 463.762   1
  -2 -14  -6 2336.84 506.947  -1
   2  14   6 5110.77 592.940   1
  -2 -14  -7 -238.19 395.043   1
  -2 -14  -7 -337.33 500.938   1
  -2 -14  -8 1547.88 431.092   1
  -2 -14  -8 2737.14 613.593   1
   2  14   8 5065.71 628.238   1
  -2 -14  -9  261.88 456.252   1
  -2 -14 -10   23.87 357.191   1
   2  14  10  369.58 355.463   1
  -2 -14 -11  341.79 364.288   1
   2  14  11  665.79 414.945   1
  -2 -14 -12 1762.30 461.885   1
   2  14  12 3719.11 544.123   1
  -3   0  38 -211.38 334.960   1
  -3   0  38  685.69 499.061   1
   3   0 -37 -501.69 437.852   1
  -3   0  37  -56.10 304.957   1
   3   0 -36 3484.41 909.500   1
   3   0 -36 5208.41 808.110   1
  -3   0  36 5069.47 637.626   1
   3   0 -35 1233.95 695.080   1
   3   0 -35  136.88 573.788   1
  -3   0  35  116.52 224.446   1
  -3   0  35 -269.73 465.640   1
   3   0 -34 5392.41 790.461   1
   3   0 -34 4190.76 819.751   1
  -3   0  34 5933.15 726.999   1
   3   0 -33   78.37 504.693   1
  -3   0  33 -171.61 184.453   1
  -3   0  33 -112.50 500.938   1
   3   0 -32 1123.54 555.764   1
   3   0 -32 1250.47 645.512   1
  -3   0  32  988.36 258.130   1
  -3   0  32  702.21 539.616   1
   3   0 -31   44.50 536.612   1
  -3   0  31  -39.62 434.472   1
   3   0 -30  22047. 1380.40   1
   3   0 -30  25021. 1397.67   1
  -3   0  30  25133. 1294.78  -1
  -3   0  30  23229. 959.068   1
   3   0 -29  513.33 507.322   1
   3   0 -29 -644.76 410.439   1
  -3   0  29  -28.60 383.402   1
  -3   0  29  258.66 191.100   1
   3   0 -28  28366. 1420.58   1
   3   0 -28  26793. 1437.10   1
  -3   0  28  29347. 1146.45   1
  -3   0  28  29670. 1418.32   1
   3   0 -27   48.59 364.964   1
  -3   0  27   87.57 170.972   1
   3   0 -26  200.86 378.520  -1
   3   0 -26   -9.47 415.696   1
  -3   0  26 -204.09 372.700   1
  -3   0  26  330.79 190.236   1
   3   0 -25  -88.73 367.442   1
   3   0 -25 -250.51 411.190   1
  -3   0  25 -282.65 359.669   1
  -3   0  25  140.18 179.985  -1
   3   0 -24  67593. 2623.35   1
  -3   0  24  66692. 2511.45  -1
   3   0 -23  233.16 369.733   1
   3   0 -23 -541.12 326.436  -1
  -3   0  23  161.81 349.418   1
  -3   0  23  100.83 168.081   1
   3   0 -22 169433. 5719.11   1
   3   0 -22 170484. 5696.58   1
  -3   0  22 173601. 5775.44   1
  -3   0  22 176192. 5662.78   1
   3   0 -21 -146.45 301.765   1
   3   0 -21  510.70 352.121   1
  -3   0  21 -149.98 313.406   1
  -3   0  21    7.84 164.326   1
   3   0 -20  20807. 1088.25   1
  -3   0  20  19166. 801.351   1
   3   0 -19  231.02 270.447   1
  -3   0  19 -159.11 306.496   1
  -3   0  19  -31.13 152.572   1
   3   0 -18 115246. 3957.94   1
   3   0 -18 111190. 3781.45   1
  -3   0  18 109425. 3585.43   1
  -3   0  18 111491. 3792.71   1
   3   0 -17   84.83 222.756   1
   3   0 -17  149.38 254.900   1
  -3   0  17 -105.97 225.648   1
  -3   0  17  -66.88 134.735   1
   3   0 -16 103342. 3521.96   1
   3   0 -16 103718. 3509.20   1
  -3   0  16 116185. 3815.24   1
   3   0 -15  218.81 146.001   1
  -3   0  15  -72.32 203.530   1
   3   0 -14  76906. 2637.62   1
   3   0 -14  76755. 2553.51   1
  -3   0  14  75216. 2500.56   1
  -3   0  14  76155. 2619.60   1
   3   0 -13  121.29 136.613   1
   3   0 -13  237.10 200.563   1
  -3   0  13   13.44 170.259   1
  -3   0  13   24.12 121.404   1
   3   0 -12 293053. 9260.22   1
   3   0 -12 288171. 9053.69   1
  -3   0  12 289410. 9087.49   1
  -3   0  12 292677. 9263.98   1
   3   0 -11  133.42 152.422   1
   3   0 -11  113.82 121.367   1
  -3   0  11 -195.16 158.543   1
  -3   0  11  213.33 119.865   1
   3   0 -10  77694. 2576.42   1
   3   0 -10  80924. 2644.76  -1
  -3   0  10  80511. 2622.23   1
  -3   0  10  79309. 2651.52   1
   3   0  -9  -12.44 130.604   1
   3   0  -9   77.92 101.014   1
  -3   0   9   76.83  98.310   1
  -3   0   9   76.83 129.027   1
   3   0  -8  73714. 2404.43   1
   3   0  -8  68795. 2267.74   1
  -3   0   8  69320. 2300.79  -1
  -3   0   8  72174. 2344.35   1
   3   0  -7  253.55 112.692   1
  -3   0   7  128.91  90.687   1
   3   0  -6 563274.  17484.   1
   3   0  -6 572286.  17751.   1
  -3   0   6 567780.  17600.   1
  -3   0   6 564025.  17518.   1
   3   0  -5    9.58  88.810   1
   3   0  -5    7.38  78.182   1
  -3   0   5   43.56  75.817   1
  -3   0   5  112.28  90.725   1
   3   0  -4 3392.04 198.197   1
   3   0  -4 3845.28 201.539   1
  -3   0   4 3619.22 205.182   1
  -3   0   4 3730.75 190.987   1
   3   0  -3   58.88  62.336   1
   3   0  -3  147.77  86.406   1
  -3   0   3   51.37  78.182   1
  -3   0   3  121.78  69.208   1
   3   0  -2 298085. 9256.47   1
   3   0  -2 288321. 8952.30   1
  -3   0   2 295569. 9177.61   1
  -3   0   2 305219. 9493.04   1
   3   0  -1  137.59  71.761   1
   3   0  -1  266.69  87.495   1
  -3   0   1  119.79  83.627   1
   3   0   0 597070.  18472.   1
  -3   0   0 618099.  19136.   1
  -3   0   0 657153.  20345.   1
   3   0   1  180.32  78.746   1
   3   0   1   13.11  21.048   1
  -3   0  -1  228.76  88.246   1
  -3   0  -1  124.86 101.577   1
   3   0   2 5133.30 248.704   1
   3   0   2 4990.61 262.260   1
  -3   0  -2 4693.95 230.304   1
   3   0   3  -29.47  92.152   1
  -3   0  -3   69.06 109.050   1
  -3   0  -3   69.62  94.142   1
   3   0   5  -18.79 113.105   1
   3   0   5   -3.95 129.140   1
  -3   0  -5  100.08 123.733   1
  -3   0  -5   45.02 105.783   1
   3   0   6 324821.  10158.   1
   3   0   6 332594.  10402.   1
  -3   0  -6 323169.  10131.   1
  -3   0  -6 331055.  10338.   1
   3   0   7   52.72 138.978   1
   3   0   7  157.75 160.420   1
  -3   0  -7  103.34 153.811   1
  -3   0  -7  146.08 133.609  -1
   3   0   8 2642.51 264.175   1
   3   0   8 2120.91 237.551   1
  -3   0  -8 2189.26 249.268  -1
  -3   0  -8 2220.80 225.084   1
   3   0   9  144.84 187.495   1
   3   0   9  410.44 180.285   1
  -3   0  -9  174.92 169.733   1
  -3   0  -9   58.32 149.868   1
   3   0  10 319489.  10060.   1
   3   0  10 315171. 9954.93   1
  -3   0 -10 318550.  10075.   1
  -3   0 -10 319564.  10045.   1
   3   0  11  311.49 219.602   1
   3   0  11 -109.54 187.833   1
  -3   0 -11 -120.01 171.573   1
  -3   0 -11  -47.73 191.738   1
   3   0  12 162110. 5245.96   1
  -3   0 -12 157829. 5099.51   1
   3   0  13  319.71 255.501  -1
   3   0  13  339.02 228.051  -1
  -3   0 -13   52.99 227.375   1
  -3   0 -13   11.77 210.514   1
   3   0  14  36440. 1398.42   1
   3   0  14  32677. 1334.58   1
  -3   0 -14  35156. 1355.61   1
  -3   0 -14  36699. 1464.14   1
   3   0  15  322.72 287.795   1
  -3   0 -15  -58.09 230.792   1
   3   0  16 143522. 4825.38   1
  -3   0 -16 140969. 4637.62   1
  -3   0 -16 150657. 5016.89   1
   3   0  17  218.51 319.602   1
   3   0  17  198.16 268.156   1
  -3   0 -17 -171.95 245.174   1
  -3   0 -17  -36.03 217.086   1
   3   0  18  48592. 1977.84   1
   3   0  18  47578. 1800.22   1
  -3   0 -18  45775. 1725.87   1
  -3   0 -18  48366. 1906.12   1
   3   0  19  249.38 265.077   1
  -3   0 -19   -3.15 286.932   1
  -3   0 -19 -480.28 242.621   1
   3   0  20  21990. 910.251   1
   3   0  20  23207. 1076.98   1
  -3   0 -20  23485. 1073.98   1
  -3   0 -20  22734. 1143.82   1
   3   0  21  132.14 319.865   1
  -3   0 -21  255.13 295.043   1
   3   0  22  85505. 2885.09   1
   3   0  22  87570. 3086.74   1
  -3   0 -22  88734. 3135.18   1
  -3   0 -22  88659. 3236.20  -1
   3   0  23  154.11 156.252   1
   3   0  23  413.07 319.639   1
  -3   0 -23  236.42 339.729   1
  -3   0 -23   82.54 303.943   1
   3   0  24  209.28 162.711   1
  -3   0 -24  582.43 419.451   1
   3   0  25  -68.46 142.358   1
   3   0  25 -341.01 363.387   1
  -3   0 -25   13.56 320.953   1
  -3   0 -25    7.81 359.294   1
   3   0  26 5182.12 366.842   1
  -3   0 -26 4371.01 555.013   1
  -3   0 -26 5936.91 677.055   1
   3   0  27  369.32 399.549   1
   3   0  27   56.29 154.149   1
  -3   0 -27  214.91 445.737   1
  -3   0 -27 -537.74 380.398   1
   3   0  28  32456. 1448.74   1
  -3   0 -28  32283. 1520.46   1
   3   0  29   -0.50 163.838   1
   3   0  29  147.77 393.165   1
  -3   0 -29  320.88 437.852   1
  -3   0 -29 -209.09 484.040   1
   3   0  30  647.01 186.669  -1
   3   0  30  694.33 454.750   1
  -3   0 -31 -290.42 463.387   1
  -3   0 -31 -116.52 495.306   1
   3   0  32 5456.25 681.561   1
  -3   0 -32 3428.46 624.859   1
  -3   0 -32 4123.17 729.628   1
   3   0  33 -178.86 465.264   1
   3   0  33  134.74 190.161   1
  -3   0 -33  -98.50 532.482   1
  -3   0 -33   42.36 468.268   1
   3   0  34  17593. 812.992   1
  -3   0 -34  15475. 1229.44   1
   3   0  35  -93.32 242.208   1
   3   0  35 -240.59 423.582   1
   3   0  36  -15.66 375.892   1
   3  -1 -38 3033.79 560.645   1
   3  -1 -37  148.03 469.771   1
  -3  -1  37   44.69 418.700   1
  -3  -1  37  165.30 386.030   1
  -3   1  37   -8.92 269.132   1
  -3   1  37  384.15 386.406   1
   3  -1 -36 2948.18 692.827   1
  -3  -1  36 2663.91 380.022  -1
  -3  -1  36 2736.01 575.666   1
   3   1 -36 1840.78 773.187   1
   3   1 -36 1676.68 673.676   1
  -3   1  36 2246.71 524.220   1
  -3   1  36 3183.62 348.366   1
   3  -1 -35 2531.35 633.495   1
  -3  -1  35 1687.94 587.307   1
  -3  -1  35 2805.48 368.869   1
   3   1 -35 2067.59 674.051   1
   3   1 -35  893.73 743.897   1
  -3   1  35 2674.42 336.350   1
  -3   1  35 1408.56 590.311   1
   3  -1 -34 3509.95 807.735   1
  -3  -1  34 3109.27 634.246   1
  -3  -1  34 2686.44 346.827   1
   3   1 -34 1741.27 750.281   1
   3   1 -34 2184.00 718.362   1
  -3   1  34 2773.56 590.311   1
   3  -1 -33  604.21 505.445   1
   3  -1 -33  -83.70 603.454   1
  -3  -1  33  543.00 515.959   1
   3   1 -33   28.96 615.095   1
  -3   1  33  556.51 213.669   1
  -3   1  33  293.47 464.889   1
  -3  -1  32  10113. 871.948  -1
  -3  -1  32  10571. 576.793   1
   3   1 -32 7855.79 885.091   1
   3   1 -32 9872.31 978.970   1
  -3   1  32 9218.92 829.139   1
  -3   1  32  10665. 574.164   1
   3  -1 -31  246.53 482.538   1
  -3  -1  31   84.38 475.028  -1
  -3  -1  31  354.22 206.722   1
   3   1 -31   -6.47 514.832   1
   3   1 -31  179.42 529.102   1
  -3   1  31  261.17 188.359   1
   3  -1 -30 7157.33 790.086   1
   3  -1 -30 7469.01 894.104   1
  -3  -1  30 8839.65 493.428   1
  -3  -1  30 8471.64 773.563   1
   3   1 -30 8400.29 843.409   1
   3   1 -30 8757.03 907.247   1
  -3   1  30 8505.44 759.293   1
  -3   1  30 8918.50 502.816   1
   3  -1 -29 7900.86 886.218   1
  -3  -1  29 9121.28 499.061   1
   3   1 -29 7217.42 798.722   1
  -3   1  29 8452.87 762.673   1
   3  -1 -28 7833.26 841.531  -1
   3  -1 -28 8809.61 807.359   1
  -3  -1  28 8907.24 496.808   1
  -3  -1  28 8565.52 708.599   1
   3   1 -28 8610.58 762.673   1
   3   1 -28 9173.86 840.780  -1
  -3   1  28 7870.81 723.619   1
  -3   1  28 9421.70 527.600   1
   3  -1 -27  785.58 440.105   1
   3  -1 -27  -18.43 452.872   1
  -3  -1  27  206.80 359.594   1
  -3  -1  27  446.86 197.672   1
   3   1 -27  137.18 391.663   1
   3   1 -27  387.91 420.202   1
  -3   1  27  219.60 411.941   1
  -3   1  27  392.79 189.898   1
   3  -1 -26  49681. 2160.34   1
   3  -1 -26  48028. 2019.90   1
  -3  -1  26  51709. 2056.33   1
   3   1 -26  51183. 2104.02   1
  -3   1  26  48930. 1754.04   1
  -3   1  26  50770. 2078.11   1
   3  -1 -25 1714.61 449.117   1
  -3  -1  25  862.18 382.275   1
  -3  -1  25 1286.14 228.126   1
   3   1 -25 1473.90 404.806   1
   3   1 -25 1475.40 445.362   1
  -3   1  25 1420.20 232.444  -1
   3  -1 -24 4904.24 622.605   1
   3  -1 -24 4675.17 558.017   1
  -3  -1  24 4389.78 529.102   1
  -3  -1  24 5046.93 357.266  -1
   3   1 -24 5606.45 559.143   1
   3   1 -24 5546.37 604.205   1
  -3   1  24 5632.74 390.537  -1
  -3   1  24 5276.00 591.438   1
   3  -1 -23  13387. 915.883   1
   3  -1 -23  12553. 826.886   1
  -3  -1  23  12009. 576.417   1
  -3  -1  23  11893. 760.795   1
   3   1 -23  12798. 784.828   1
   3   1 -23  14228. 888.846   1
  -3   1  23  13121. 855.801   1
  -3   1  23  12441. 609.838   1
   3  -1 -22  44386. 1885.09   1
  -3  -1  22  41645. 1489.30   1
  -3  -1  22  43898. 1744.27   1
   3   1 -22  42246. 1682.69   1
   3   1 -22  44686. 1822.38   1
  -3   1  22  44499. 1823.88   1
   3  -1 -21 1043.93 375.216   1
   3  -1 -21 1211.41 428.839   1
  -3  -1  21 1620.35 225.723   1
   3   1 -21 1329.70 339.204   1
  -3   1  21 1340.22 395.043   1
  -3   1  21 1419.45 236.838   1
   3  -1 -20 102629. 3661.66   1
   3  -1 -20  95494. 3363.50   1
  -3  -1  20 100150. 3439.73   1
  -3  -1  20  97371. 3203.15   1
   3   1 -20 101352. 3517.46   1
   3   1 -20  97071. 3336.83  -1
  -3   1  20 102666. 3592.94   1
  -3   1  20  98122. 3266.61   1
   3  -1 -19  13290. 825.760   1
   3  -1 -19  11581. 719.864   1
  -3  -1  19  11145. 527.975   1
  -3  -1  19  11292. 673.300   1
   3   1 -19  12347. 727.374   1
   3   1 -19  10616. 632.369   1
  -3   1  19  11765. 588.809   1
   3  -1 -18   86.78 272.925  -1
   3  -1 -18   55.99 284.341   1
  -3  -1  18 -180.32 264.138   1
  -3  -1  18    3.01 138.866   1
   3   1 -18   60.05 235.711   1
   3   1 -18  278.14 269.771   1
  -3   1  18   96.62 311.077   1
  -3   1  18  165.08 161.660   1
   3  -1 -17  38565. 1544.87   1
   3  -1 -17  35130. 1482.54   1
  -3  -1  17  36718. 1427.34   1
   3   1 -17  35742. 1419.07   1
  -3   1  17  37398. 1514.08   1
  -3   1  17  38152. 1394.67   1
  -3  -1  16 102816. 3340.59   1
  -3  -1  16 102704. 3437.47   1
   3   1 -16 103342. 3458.13   1
   3   1 -16  96620. 3276.38   1
  -3   1  16 101652. 3350.73   1
   3  -1 -15 3003.38 269.583   1
   3  -1 -15 2675.93 343.747   1
  -3  -1  15 2089.37 282.388   1
  -3  -1  15 3027.79 243.372   1
   3   1 -15 1811.49 274.052   1
   3   1 -15 1985.73 311.115   1
  -3   1  15 2088.62 320.353   1
  -3   1  15 2895.60 263.349   1
   3  -1 -14 174615. 5692.82   1
   3  -1 -14 182351. 5843.03   1
  -3  -1  14 172925. 5580.17   1
  -3  -1  14 178558. 5662.78   1
   3   1 -14 177619. 5704.09   1
   3   1 -14 175291. 5565.15   1
  -3   1  14 174502. 5700.33   1
  -3   1  14 174127. 5576.41   1
   3  -1 -13  25655. 984.603   1
  -3  -1  13  26992. 1053.70   1
  -3  -1  13  26962. 974.088   1
   3   1 -13  26924. 980.472   1
   3   1 -13  26861. 1034.55   1
  -3   1  13  29230. 1184.75   1
   3  -1 -12  258.99 188.997   1
   3  -1 -12    9.16 122.756   1
  -3  -1  12    9.28 107.285   1
  -3  -1  12   83.70 154.562   1
   3   1 -12  308.82 122.906   1
   3   1 -12  204.13 149.606   1
  -3   1  12  -90.01 175.554   1
  -3   1  12  124.26 135.524   1
   3  -1 -11  55764. 1903.11   1
   3  -1 -11  53962. 1903.49   1
  -3  -1  11  52798. 1808.48   1
  -3  -1  11  56778. 1871.20   1
   3   1 -11  56628. 1880.96   1
   3   1 -11  53999. 1828.39  -1
  -3   1  11  56177. 1914.76   1
  -3   1  11  54788. 1941.42   1
   3  -1 -10 136725. 4434.84   1
   3  -1 -10 138603. 4449.86   1
  -3  -1  10 140818. 4449.86   1
   3   1 -10 137852. 4397.29   1
  -3   1  10 141570. 4543.74   1
  -3   1  10 133947. 4371.01   1
   3  -1  -9  243.45 128.689   1
   3  -1  -9  207.10 157.003   1
  -3  -1   9  242.77  94.442  -1
   3   1  -9   81.30 108.937   1
  -3   1   9  179.12 157.266   1
  -3   1   9  155.01 119.527   1
   3  -1  -8  68419. 2266.61   1
   3  -1  -8  75516. 2511.08   1
  -3  -1   8  71386. 2288.77   1
  -3  -1   8  73151. 2380.40   1
   3   1  -8  70522. 2274.50   1
   3   1  -8  72362. 2337.96   1
  -3   1   8  69020. 2273.37   1
  -3   1   8  71611. 2404.80   1
   3  -1  -7 193090. 6105.89  -1
   3  -1  -7 188584. 5981.97   1
  -3  -1   7 188809. 5929.40   1
  -3  -1   7 196770. 6147.20   1
   3   1  -7 196958. 6165.97   1
   3   1  -7 191325. 5993.24   1
  -3   1   7 190424. 6049.56  -1
  -3   1   7 192565. 6072.09   1
   3  -1  -6 1168.98 148.817   1
   3  -1  -6 1741.64 185.730   1
  -3  -1   6 1410.06 135.298   1
  -3  -1   6 1424.71 113.143   1
   3   1  -6 1361.25 119.039   1
   3   1  -6 1932.03 147.690   1
  -3   1   6 1621.85 159.857   1
  -3   1   6 1873.45 191.438   1
   3  -1  -5  579.42 123.282   1
   3  -1  -5  469.02 115.546   1
  -3  -1   5  587.31  99.887   1
  -3  -1   5  615.85  80.886   1
   3   1  -5  422.08  95.982   1
   3   1  -5  444.24  80.698   1
  -3   1   5  547.88 110.327   1
  -3   1   5  432.22 130.529   1
   3  -1  -4  60120. 1973.34   1
  -3  -1   4  57792. 1839.28   1
  -3  -1   4  58318. 1872.32   1
   3   1  -4  57416. 1831.02   1
   3   1  -4  60421. 1922.27   1
  -3   1   4  59181. 1928.27  -1
   3  -1  -3  50131. 1653.40   1
   3  -1  -3  55051. 1807.73   1
  -3  -1   3  50882. 1629.36   1
  -3  -1   3  51821. 1661.28   1
   3   1  -3  54638. 1745.77   1
   3   1  -3  51145. 1634.62   1
  -3   1   3  52760. 1751.03   1
  -3   1   3  52760. 1720.61   1
   3  -1  -2 383777.  11926.   1
  -3  -1   2 351633.  10909.   1
  -3  -1   2 395418.  12257.   1
   3   1  -2 390912.  12114.   1
   3   1  -2 364664.  11307.   1
  -3   1   2 384153.  11941.   1
  -3   1   2 389035.  12077.   1
   3  -1  -1 177168. 5546.37   1
   3  -1  -1 185655. 5812.99   1
  -3  -1   1 178558. 5580.17  -1
  -3  -1   1 182914. 5711.60   1
   3   1  -1 190462. 5948.17   1
   3   1  -1 166466. 5204.65   1
  -3   1   1 180848. 5666.54   1
  -3   1   1 176004. 5497.55   1
   3  -1   0  38453. 1262.86  -1
   3  -1   0  36361. 1192.26   1
  -3  -1   0  38828. 1289.52   1
  -3  -1   0  38115. 1256.48   1
   3   1   0  36203. 1199.77   1
  -3   1   0  35978. 1196.39   1
  -3   1   0  38190. 1250.47   1
   3  -1   1  13954. 505.820   1
  -3  -1  -1  15471. 587.682   1
  -3  -1  -1  14863. 555.013   1
   3   1   1  15648. 578.670   1
   3   1   1  15445. 577.168   1
  -3   1  -1  14668. 533.984   1
  -3   1  -1  15892. 575.666   1
   3  -1   2 200676. 6263.61   1
   3  -1   2 207923. 6492.67   1
  -3  -1  -2 202966. 6383.77   1
   3   1   2 205633. 6451.36   1
  -3   1  -2 219677. 6849.41   1
  -3   1  -2 224897. 7018.39   1
   3  -1   3 9417.94 386.030  -1
   3  -1   3 7938.41 332.482   1
  -3  -1  -3 8366.50 381.149   1
  -3  -1  -3 8280.13 396.545   1
   3   1   3 8404.05 407.810   1
   3   1   3 7915.88 367.480   1
  -3   1  -3 8306.41 341.982   1
   3  -1   4  67781. 2184.38   1
  -3  -1  -4  65490. 2181.00   1
  -3  -1  -4  68757. 2252.34   1
   3   1   4  65790. 2167.85   1
  -3   1  -4  70710. 2283.51   1
[truncated: 2,117,180 more chars]
