# Supplementary material for: Platinum(0)-η2-1,2-(E)ditosylethene Complexes Bearing Phosphine, Isocyanide and N-Heterocyclic Carbene Ligands: Synthesis and Cytotoxicity towards Ovarian and Breast Cancer Cells
Source: Molecules. 2024 Mar 1;29(5):1119. doi: 10.3390/molecules29051119 (PMC10934098; doi:10.3390/molecules29051119)
Supplement: Supplementary file 1 [file molecules-29-01119-s001.zip › 3b.cif]

data_NC3

_publ_section_title
;
Platinum - trans-sulfone based organometallic complexes
;
 
_publ_contact_author_name        'Nicola Demitri'
_publ_contact_author_address     
;
Elettra-Sincrotrone Trieste, S.S. 14 Km 163.5 in Area Science Park, 
34149 Basovizza - Trieste, Italy.
;
_publ_contact_author_email       nicola.demitri@elettra.eu
_publ_contact_author_phone       '+39 040 375 8861'
loop_
_publ_author_name
_publ_author_address
'Demitri, Nicola'
;
Elettra-Sincrotrone Trieste, S.S. 14 Km 163.5 in Area Science Park, 
34149 Basovizza-Trieste, Italy.
;
'Visentin, Fabiano'
;
Dipartimento di Scienze Molecolari e Nanosistemi, Universita' Ca' Foscari,
Campus Scientifico - Via Torino 155, 30174 Venezia-Mestre, Italy.
;

_publ_section_abstract
;
The structure of NC3, PtC~34~H~34~N~2~O~8~S~4~, at 100 K has
triclinic (<i>P</i>-1) symmetry. 
;
_publ_contact_letter 
;
Please consider this CIF for publication. I certify that this contibution is the
original work of those listed as authors; that it has not been published
before (in any language or medium) and is not being considered for publication
elsewhere; that all authors concur with and are aware of the submission; that
all workers involved in the study are listed as authors or given proper credit
in the acknowledgements; that I have obtained permission for and acknowledged
the source of any excerpts from other copyright works; and that to the best of
my knowledge the paper contains no statements which are libellous, unlawful or
in any way actionable. All coauthors have made significant scientific
contributions to the work reported, including the ideas and their execution,
and share responsibility and accountability for the results.
;

_audit_creation_method            'SHELXL-2019/3'
_shelx_SHELXL_version_number      '2019/3'
_chemical_name_systematic         ?
_chemical_name_common             ?
_chemical_melting_point           ?
_chemical_formula_moiety
 'C34 H34 N2 O8 Pt S4'
_chemical_formula_sum
 'C34 H34 N2 O8 Pt S4'
_chemical_formula_weight          921.96

loop_
 _atom_type_symbol
 _atom_type_description
 _atom_type_scat_dispersion_real
 _atom_type_scat_dispersion_imag
 _atom_type_scat_source
 'C'  'C'   0.0020   0.0012
 'International Tables Vol C Tables 4.2.6.8 and 6.1.1.4'
 'N'  'N'   0.0042   0.0025
 'International Tables Vol C Tables 4.2.6.8 and 6.1.1.4'
 'O'  'O'   0.0077   0.0045
 'International Tables Vol C Tables 4.2.6.8 and 6.1.1.4'
 'S'  'S'   0.0994   0.0945
 'International Tables Vol C Tables 4.2.6.8 and 6.1.1.4'
 'Pt'  'Pt'  -0.8479   6.7557
 'International Tables Vol C Tables 4.2.6.8 and 6.1.1.4'
 'H'  'H'   0.0000   0.0000
 'International Tables Vol C Tables 4.2.6.8 and 6.1.1.4'
 
_space_group_crystal_system       triclinic
_space_group_IT_number            2
_space_group_name_H-M_alt         'P -1'
_space_group_name_Hall            '-P 1'
 
_shelx_space_group_comment
;
The symmetry employed for this shelxl refinement is uniquely defined
by the following loop, which should always be used as a source of
symmetry information in preference to the above space-group names.
They are only intended as comments.
;
 
loop_
 _space_group_symop_operation_xyz
 'x, y, z'
 '-x, -y, -z'
 
_cell_length_a                    10.295(2)
_cell_length_b                    13.985(3)
_cell_length_c                    14.334(3)
_cell_angle_alpha                 62.54(3)
_cell_angle_beta                  80.47(3)
_cell_angle_gamma                 75.95(3)
_cell_volume                      1773.1(8)
_cell_formula_units_Z             2
_cell_measurement_temperature     100(2)
_cell_measurement_reflns_used     6359
_cell_measurement_theta_min       1.458
_cell_measurement_theta_max       28.014
 
_exptl_crystal_description        'Thin blocks'
_exptl_crystal_colour             'Colourless'
_exptl_crystal_density_meas       ?
_exptl_crystal_density_method     ?
_exptl_crystal_density_diffrn     1.727          
_exptl_crystal_F_000              916
_exptl_transmission_factor_min    ?
_exptl_transmission_factor_max    ?
_exptl_crystal_size_max           0.100
_exptl_crystal_size_mid           0.050
_exptl_crystal_size_min           0.020
_exptl_absorpt_coefficient_mu     2.966
_shelx_estimated_absorpt_T_min    0.756
_shelx_estimated_absorpt_T_max    0.943
_exptl_absorpt_correction_type    none
_exptl_absorpt_correction_T_min   ?
_exptl_absorpt_correction_T_max   ?
_exptl_absorpt_process_details    ?
_exptl_absorpt_special_details    ?
_diffrn_ambient_temperature       100(2)
_diffrn_radiation_wavelength      0.620

_diffrn_measurement_method       'Rotating crystal'
_diffrn_radiation_type           Synchrotron
_diffrn_source                   'Elettra Synchrotron - XRD2 BL'
_diffrn_measurement_device_type  
;
'Arinax MD2s Goniometer, Pilatus 6M detector'
;
_diffrn_detector_area_resol_mean  ?
_diffrn_reflns_number             64502
_diffrn_reflns_av_unetI/netI      0.0375
_diffrn_reflns_av_R_equivalents   0.0568
_diffrn_reflns_limit_h_min        -15
_diffrn_reflns_limit_h_max        15
_diffrn_reflns_limit_k_min        -21
_diffrn_reflns_limit_k_max        21
_diffrn_reflns_limit_l_min        -21
_diffrn_reflns_limit_l_max        21
_diffrn_reflns_theta_min          1.458
_diffrn_reflns_theta_max          28.014
_diffrn_reflns_theta_full         21.839
_diffrn_measured_fraction_theta_max   0.979
_diffrn_measured_fraction_theta_full  0.974
_diffrn_reflns_Laue_measured_fraction_max    0.979
_diffrn_reflns_Laue_measured_fraction_full   0.974
_diffrn_reflns_point_group_measured_fraction_max   0.979
_diffrn_reflns_point_group_measured_fraction_full  0.974
_reflns_number_total              12650
_reflns_number_gt                 12023
_reflns_threshold_expression      'I > 2\s(I)'
_reflns_Friedel_coverage          0.000
_reflns_Friedel_fraction_max      .
_reflns_Friedel_fraction_full     .
 
_reflns_special_details
;
 Reflections were merged by SHELXL according to the crystal
 class for the calculation of statistics and refinement.
 
 _reflns_Friedel_fraction is defined as the number of unique
 Friedel pairs measured divided by the number that would be
 possible theoretically, ignoring centric projections and
 systematic absences.
;

_diffrn_standards_number 0
_diffrn_standards_interval_count 0
_diffrn_standards_decay_% 0
 
_computing_data_collection       'Elettra XRD2 Data Collection SW'
_computing_cell_refinement       'XDS (Kabsch, 2010)'
_computing_data_reduction        'XDS (Kabsch, 2010)'
_computing_structure_solution    'SHELXT (Sheldrick, 2015)'
_computing_structure_refinement 'SHELXL-2019/3 (Sheldrick, 2015)'
_computing_molecular_graphics    'Ortep3 for Windows - Coot'
_computing_publication_material  'enCIFer - publCIF'
 
_refine_special_details
;
Hydrogen atoms were included at calculated positions with isotropic 
Ufactors=1.2Ueq or Ufactors=1.5Ueq for methyl groups. Anisotropic thermal
motion modeling has been applied to all atoms.
;

_refine_ls_structure_factor_coef  Fsqd
_refine_ls_matrix_type            full
_refine_ls_weighting_scheme       calc
_refine_ls_weighting_details
'w=1/[\s^2^(Fo^2^)+(0.0260P)^2^+0.5549P] where P=(Fo^2^+2Fc^2^)/3'
_atom_sites_solution_primary      direct
_atom_sites_solution_secondary    difmap
_atom_sites_solution_hydrogens    geom
_refine_ls_hydrogen_treatment     constr
_refine_ls_extinction_method      none
_refine_ls_extinction_coef        .
_refine_ls_number_reflns          12650
_refine_ls_number_parameters      446
_refine_ls_number_restraints      0
_refine_ls_R_factor_all           0.0230
_refine_ls_R_factor_gt            0.0215
_refine_ls_wR_factor_ref          0.0538
_refine_ls_wR_factor_gt           0.0534
_refine_ls_goodness_of_fit_ref    1.038
_refine_ls_restrained_S_all       1.038
_refine_ls_shift/su_max           0.031
_refine_ls_shift/su_mean          0.000
 
loop_
 _atom_site_label
 _atom_site_type_symbol
 _atom_site_fract_x
 _atom_site_fract_y
 _atom_site_fract_z
 _atom_site_U_iso_or_equiv
 _atom_site_adp_type
 _atom_site_occupancy
 _atom_site_site_symmetry_order  
 _atom_site_calc_flag
 _atom_site_refinement_flags_posn
 _atom_site_refinement_flags_adp
 _atom_site_refinement_flags_occupancy
 _atom_site_disorder_assembly
 _atom_site_disorder_group
Pt_1 Pt 0.35686(2) 0.29994(2) 0.46141(2) 0.01375(2) Uani 1 1 d . . . . .
C8_2 C 0.69266(17) 0.26830(15) 0.15396(12) 0.0184(3) Uani 1 1 d . . . . .
H8_2 H 0.602800 0.304101 0.137095 0.022 Uiso 1 1 calc R U . . .
C7_2 C 0.77724(18) 0.23025(16) 0.08728(13) 0.0224(3) Uani 1 1 d . . . . .
H7_2 H 0.744741 0.239862 0.024640 0.027 Uiso 1 1 calc R U . . .
C6_2 C 0.90958(19) 0.17797(16) 0.11122(15) 0.0246(3) Uani 1 1 d . . . . .
C9_2 C 1.0030(2) 0.1397(2) 0.0372(2) 0.0422(6) Uani 1 1 d . . . . .
H9A_2 H 1.031772 0.059750 0.072755 0.063 Uiso 1 1 calc R U . . .
H9B_2 H 1.081641 0.174566 0.016008 0.063 Uiso 1 1 calc R U . . .
H9C_2 H 0.956183 0.159759 -0.025425 0.063 Uiso 1 1 calc R U . . .
C5_2 C 0.95559(19) 0.16347(17) 0.20363(16) 0.0263(3) Uani 1 1 d . . . . .
H5_2 H 1.045397 0.127655 0.220694 0.032 Uiso 1 1 calc R U . . .
C4_2 C 0.87141(18) 0.20089(15) 0.27147(14) 0.0217(3) Uani 1 1 d . . . . .
H4_2 H 0.903351 0.190402 0.334654 0.026 Uiso 1 1 calc R U . . .
C3_2 C 0.74084(15) 0.25349(13) 0.24603(11) 0.0147(2) Uani 1 1 d . . . . .
S1_2 S 0.63641(4) 0.30975(3) 0.32625(3) 0.01476(6) Uani 1 1 d . . . . .
O1_2 O 0.72018(14) 0.30636(12) 0.39972(10) 0.0244(3) Uani 1 1 d . . . . .
O2_2 O 0.56277(14) 0.41464(10) 0.25634(10) 0.0213(2) Uani 1 1 d . . . . .
C1_2 C 0.52079(15) 0.22404(12) 0.39807(11) 0.0130(2) Uani 1 1 d . . . . .
H1_2 H 0.558514 0.145605 0.444115 0.016 Uiso 1 1 calc R U . . .
C2_2 C 0.39863(15) 0.24505(12) 0.34677(10) 0.0129(2) Uani 1 1 d . . . . .
H2_2 H 0.396606 0.305842 0.273572 0.015 Uiso 1 1 calc R U . . .
S2_2 S 0.33018(3) 0.13579(3) 0.36061(2) 0.01137(6) Uani 1 1 d . . . . .
O4_2 O 0.19737(12) 0.18062(11) 0.32164(9) 0.0182(2) Uani 1 1 d . . . . .
O3_2 O 0.34508(11) 0.04850(10) 0.46621(8) 0.01463(19) Uani 1 1 d . . . . .
C10_2 C 0.43404(15) 0.08820(12) 0.27414(10) 0.0129(2) Uani 1 1 d . . . . .
C15_2 C 0.39742(17) 0.12873(14) 0.17147(11) 0.0177(3) Uani 1 1 d . . . . .
H15_2 H 0.314839 0.178102 0.149336 0.021 Uiso 1 1 calc R U . . .
C14_2 C 0.48420(19) 0.09549(15) 0.10179(12) 0.0219(3) Uani 1 1 d . . . . .
H14_2 H 0.460449 0.123088 0.031438 0.026 Uiso 1 1 calc R U . . .
C13_2 C 0.60449(18) 0.02292(15) 0.13330(13) 0.0216(3) Uani 1 1 d . . . . .
C16_2 C 0.6997(2) -0.0102(2) 0.05718(16) 0.0316(4) Uani 1 1 d . . . . .
H16A_2 H 0.735776 -0.089148 0.091918 0.047 Uiso 1 1 calc R U . . .
H16B_2 H 0.773460 0.030344 0.033874 0.047 Uiso 1 1 calc R U . . .
H16C_2 H 0.651870 0.006648 -0.003894 0.047 Uiso 1 1 calc R U . . .
C12_2 C 0.63795(18) -0.01804(16) 0.23750(13) 0.0213(3) Uani 1 1 d . . . . .
H12_2 H 0.719551 -0.068741 0.260100 0.026 Uiso 1 1 calc R U . . .
C11_2 C 0.55355(16) 0.01437(14) 0.30829(12) 0.0172(3) Uani 1 1 d . . . . .
H11_2 H 0.577033 -0.013388 0.378730 0.021 Uiso 1 1 calc R U . . .
C8_3 C 0.01336(19) 0.43790(16) 0.15759(15) 0.0256(3) Uani 1 1 d . . . . .
H8_3 H -0.072895 0.419116 0.172154 0.031 Uiso 1 1 calc R U . . .
C7_3 C 0.1076(2) 0.40687(17) 0.09089(15) 0.0267(3) Uani 1 1 d . . . . .
H7_3 H 0.085915 0.365242 0.060761 0.032 Uiso 1 1 calc R U . . .
C6_3 C 0.2340(2) 0.43547(15) 0.06697(13) 0.0244(3) Uani 1 1 d . . . . .
C9_3 C 0.3329(2) 0.40740(18) -0.01091(15) 0.0327(4) Uani 1 1 d . . . . .
H9A_3 H 0.350011 0.475180 -0.071956 0.049 Uiso 1 1 calc R U . . .
H9B_3 H 0.295826 0.364108 -0.034003 0.049 Uiso 1 1 calc R U . . .
H9C_3 H 0.417063 0.364673 0.022562 0.049 Uiso 1 1 calc R U . . .
C5_3 C 0.26610(19) 0.49277(16) 0.11541(14) 0.0247(3) Uani 1 1 d . . . . .
H5_3 H 0.352587 0.511068 0.101335 0.030 Uiso 1 1 calc R U . . .
C4_3 C 0.17404(18) 0.52343(16) 0.18362(15) 0.0240(3) Uani 1 1 d . . . . .
H4_3 H 0.197123 0.561784 0.216683 0.029 Uiso 1 1 calc R U . . .
C3_3 C 0.04687(17) 0.49702(15) 0.20295(14) 0.0218(3) Uani 1 1 d . . . . .
S1_3 S -0.07559(4) 0.54444(4) 0.28042(4) 0.02577(9) Uani 1 1 d . . . . .
O1_3 O -0.03153(17) 0.62718(14) 0.29320(16) 0.0389(4) Uani 1 1 d . . . . .
O2_3 O -0.20588(15) 0.56578(14) 0.24331(14) 0.0353(3) Uani 1 1 d . . . . .
C1_3 C -0.07964(17) 0.42978(18) 0.41006(15) 0.0261(4) Uani 1 1 d . . . . .
H1A_3 H -0.142516 0.453648 0.458857 0.031 Uiso 1 1 calc R U . . .
H1B_3 H -0.111779 0.370577 0.406160 0.031 Uiso 1 1 calc R U . . .
C_3 C 0.16412(17) 0.35593(15) 0.46045(13) 0.0188(3) Uani 1 1 d . . . . .
N_3 N 0.05067(15) 0.38972(15) 0.44844(12) 0.0233(3) Uani 1 1 d . . . . .
C8_4 C 0.83521(17) 0.22827(16) 0.73306(14) 0.0212(3) Uani 1 1 d . . . . .
H8_4 H 0.848205 0.269866 0.766509 0.025 Uiso 1 1 calc R U . . .
C7_4 C 0.94201(17) 0.18711(16) 0.68033(15) 0.0232(3) Uani 1 1 d . . . . .
H7_4 H 1.028931 0.199955 0.678971 0.028 Uiso 1 1 calc R U . . .
C6_4 C 0.92457(17) 0.12766(14) 0.62962(13) 0.0198(3) Uani 1 1 d . . . . .
C9_4 C 1.0390(2) 0.09030(18) 0.56716(16) 0.0294(4) Uani 1 1 d . . . . .
H9A_4 H 1.019945 0.029513 0.558667 0.044 Uiso 1 1 calc R U . . .
H9B_4 H 1.121431 0.065621 0.604284 0.044 Uiso 1 1 calc R U . . .
H9C_4 H 1.050445 0.151343 0.497680 0.044 Uiso 1 1 calc R U . . .
C5_4 C 0.79628(18) 0.10581(15) 0.63567(14) 0.0216(3) Uani 1 1 d . . . . .
H5_4 H 0.783266 0.063864 0.602608 0.026 Uiso 1 1 calc R U . . .
C4_4 C 0.68867(17) 0.14453(14) 0.68911(13) 0.0190(3) Uani 1 1 d . . . . .
H4_4 H 0.602585 0.128553 0.693803 0.023 Uiso 1 1 calc R U . . .
C3_4 C 0.70887(16) 0.20735(13) 0.73588(12) 0.0157(3) Uani 1 1 d . . . . .
S1_4 S 0.57236(4) 0.26745(3) 0.79377(3) 0.01490(6) Uani 1 1 d . . . . .
O1_4 O 0.47230(13) 0.20006(11) 0.83489(10) 0.0217(2) Uani 1 1 d . . . . .
O2_4 O 0.61996(13) 0.30341(12) 0.85879(9) 0.0219(2) Uani 1 1 d . . . . .
C1_4 C 0.50287(16) 0.39306(13) 0.68460(12) 0.0162(3) Uani 1 1 d . . . . .
H1A_4 H 0.429750 0.436432 0.711430 0.019 Uiso 1 1 calc R U . . .
H1B_4 H 0.573299 0.437483 0.647744 0.019 Uiso 1 1 calc R U . . .
C_4 C 0.41369(16) 0.34083(14) 0.56050(12) 0.0165(3) Uani 1 1 d . . . . .
N_4 N 0.45212(14) 0.36943(12) 0.61296(11) 0.0175(2) Uani 1 1 d . . . . .
 
loop_
 _atom_site_aniso_label
 _atom_site_aniso_U_11
 _atom_site_aniso_U_22
 _atom_site_aniso_U_33
 _atom_site_aniso_U_23
 _atom_site_aniso_U_13
 _atom_site_aniso_U_12
Pt_1 0.01565(3) 0.01886(3) 0.01260(3) -0.01136(2) 0.00013(2) -0.00491(2)
C8_2 0.0165(7) 0.0266(8) 0.0168(6) -0.0129(6) -0.0011(5) -0.0054(6)
C7_2 0.0251(8) 0.0311(8) 0.0180(6) -0.0156(6) 0.0032(6) -0.0101(7)
C6_2 0.0221(8) 0.0294(9) 0.0290(8) -0.0192(7) 0.0088(6) -0.0101(7)
C9_2 0.0319(11) 0.0584(15) 0.0531(14) -0.0429(13) 0.0161(10) -0.0120(11)
C5_2 0.0168(7) 0.0297(9) 0.0360(9) -0.0189(7) -0.0020(6) -0.0014(7)
C4_2 0.0196(7) 0.0250(8) 0.0233(7) -0.0119(6) -0.0056(6) -0.0036(6)
C3_2 0.0159(6) 0.0175(6) 0.0148(5) -0.0088(5) 0.0003(5) -0.0074(5)
S1_2 0.01892(16) 0.01767(16) 0.01405(13) -0.01015(12) 0.00123(12) -0.00949(14)
O1_2 0.0286(6) 0.0370(7) 0.0209(5) -0.0180(5) 0.0003(5) -0.0199(6)
O2_2 0.0283(6) 0.0157(5) 0.0209(5) -0.0098(4) 0.0042(4) -0.0063(5)
C1_2 0.0151(6) 0.0164(6) 0.0122(5) -0.0087(5) 0.0006(4) -0.0072(5)
C2_2 0.0158(6) 0.0166(6) 0.0115(5) -0.0097(5) -0.0004(4) -0.0050(5)
S2_2 0.01155(14) 0.01620(15) 0.01006(12) -0.00799(11) -0.00058(10) -0.00451(12)
O4_2 0.0126(5) 0.0256(6) 0.0189(5) -0.0112(4) -0.0032(4) -0.0035(4)
O3_2 0.0166(5) 0.0184(5) 0.0099(4) -0.0063(4) 0.0001(3) -0.0054(4)
C10_2 0.0154(6) 0.0174(6) 0.0113(5) -0.0096(5) 0.0005(4) -0.0064(5)
C15_2 0.0227(7) 0.0235(7) 0.0109(5) -0.0089(5) -0.0006(5) -0.0089(6)
C14_2 0.0320(9) 0.0289(8) 0.0124(6) -0.0131(6) 0.0035(5) -0.0138(7)
C13_2 0.0261(8) 0.0291(8) 0.0201(6) -0.0188(6) 0.0100(6) -0.0144(7)
C16_2 0.0356(10) 0.0436(11) 0.0301(8) -0.0288(9) 0.0171(8) -0.0192(9)
C12_2 0.0192(7) 0.0290(8) 0.0230(7) -0.0186(6) 0.0036(6) -0.0056(7)
C11_2 0.0173(7) 0.0242(7) 0.0159(6) -0.0135(5) -0.0001(5) -0.0048(6)
C8_3 0.0221(8) 0.0247(8) 0.0307(8) -0.0093(7) -0.0064(6) -0.0087(7)
C7_3 0.0302(9) 0.0250(8) 0.0249(7) -0.0086(6) -0.0076(7) -0.0063(7)
C6_3 0.0289(9) 0.0212(8) 0.0166(6) -0.0021(6) -0.0043(6) -0.0040(7)
C9_3 0.0394(11) 0.0303(10) 0.0197(7) -0.0060(7) 0.0015(7) -0.0045(9)
C5_3 0.0211(8) 0.0255(8) 0.0241(7) -0.0066(6) -0.0009(6) -0.0074(7)
C4_3 0.0186(7) 0.0260(8) 0.0298(8) -0.0125(7) -0.0004(6) -0.0085(7)
C3_3 0.0166(7) 0.0216(7) 0.0271(7) -0.0089(6) -0.0028(6) -0.0060(6)
S1_3 0.01494(18) 0.0262(2) 0.0390(2) -0.01609(18) 0.00053(16) -0.00665(16)
O1_3 0.0298(8) 0.0349(8) 0.0644(11) -0.0325(8) 0.0122(7) -0.0158(7)
O2_3 0.0171(6) 0.0367(8) 0.0455(8) -0.0127(7) -0.0045(6) -0.0032(6)
C1_3 0.0143(7) 0.0393(10) 0.0323(8) -0.0198(8) 0.0004(6) -0.0109(7)
C_3 0.0189(7) 0.0257(7) 0.0200(6) -0.0160(6) 0.0008(5) -0.0078(6)
N_3 0.0175(6) 0.0352(8) 0.0262(6) -0.0200(6) 0.0010(5) -0.0089(6)
C8_4 0.0164(7) 0.0291(8) 0.0280(7) -0.0204(7) 0.0017(6) -0.0073(6)
C7_4 0.0157(7) 0.0320(9) 0.0293(8) -0.0200(7) 0.0029(6) -0.0068(7)
C6_4 0.0198(7) 0.0211(7) 0.0208(6) -0.0124(6) 0.0042(5) -0.0048(6)
C9_4 0.0292(9) 0.0316(9) 0.0306(8) -0.0201(8) 0.0097(7) -0.0060(8)
C5_4 0.0234(8) 0.0228(7) 0.0258(7) -0.0172(6) 0.0026(6) -0.0063(6)
C4_4 0.0198(7) 0.0210(7) 0.0231(7) -0.0149(6) 0.0014(5) -0.0070(6)
C3_4 0.0153(6) 0.0193(7) 0.0170(6) -0.0118(5) 0.0009(5) -0.0045(5)
S1_4 0.01534(15) 0.02174(17) 0.01325(13) -0.01174(12) 0.00165(11) -0.00661(14)
O1_4 0.0213(6) 0.0280(6) 0.0199(5) -0.0126(5) 0.0059(4) -0.0121(5)
O2_4 0.0218(6) 0.0339(7) 0.0192(5) -0.0190(5) -0.0026(4) -0.0051(5)
C1_4 0.0173(6) 0.0207(7) 0.0179(6) -0.0140(5) -0.0022(5) -0.0039(6)
C_4 0.0174(7) 0.0206(7) 0.0155(6) -0.0119(5) 0.0004(5) -0.0035(6)
N_4 0.0179(6) 0.0219(6) 0.0181(5) -0.0134(5) -0.0012(4) -0.0039(5)
 
_geom_special_details
;
 All esds (except the esd in the dihedral angle between two l.s. planes)
 are estimated using the full covariance matrix.  The cell esds are taken
 into account individually in the estimation of esds in distances, angles
 and torsion angles; correlations between esds in cell parameters are only
 used when they are defined by crystal symmetry.  An approximate (isotropic)
 treatment of cell esds is used for estimating esds involving l.s. planes.
;
 
loop_
 _geom_bond_atom_site_label_1
 _geom_bond_atom_site_label_2
 _geom_bond_distance
 _geom_bond_site_symmetry_2
 _geom_bond_publ_flag
Pt_1 C_3 1.9481(18) . ?
Pt_1 C_4 1.9682(16) . ?
Pt_1 C2_2 2.0601(14) . ?
Pt_1 C1_2 2.0764(16) . ?
C8_2 C7_2 1.387(2) . ?
C8_2 C3_2 1.395(2) . ?
C8_2 H8_2 0.9500 . ?
C7_2 C6_2 1.396(3) . ?
C7_2 H7_2 0.9500 . ?
C6_2 C5_2 1.391(3) . ?
C6_2 C9_2 1.509(3) . ?
C9_2 H9A_2 0.9800 . ?
C9_2 H9B_2 0.9800 . ?
C9_2 H9C_2 0.9800 . ?
C5_2 C4_2 1.393(3) . ?
C5_2 H5_2 0.9500 . ?
C4_2 C3_2 1.384(2) . ?
C4_2 H4_2 0.9500 . ?
C3_2 S1_2 1.7640(17) . ?
S1_2 O2_2 1.4445(15) . ?
S1_2 O1_2 1.4457(13) . ?
S1_2 C1_2 1.7501(16) . ?
C1_2 C2_2 1.461(2) . ?
C1_2 H1_2 1.0000 . ?
C2_2 S2_2 1.7516(15) . ?
C2_2 H2_2 1.0000 . ?
S2_2 O3_2 1.4446(13) . ?
S2_2 O4_2 1.4451(13) . ?
S2_2 C10_2 1.7605(15) . ?
C10_2 C11_2 1.391(2) . ?
C10_2 C15_2 1.393(2) . ?
C15_2 C14_2 1.394(2) . ?
C15_2 H15_2 0.9500 . ?
C14_2 C13_2 1.386(3) . ?
C14_2 H14_2 0.9500 . ?
C13_2 C12_2 1.401(2) . ?
C13_2 C16_2 1.502(2) . ?
C16_2 H16A_2 0.9800 . ?
C16_2 H16B_2 0.9800 . ?
C16_2 H16C_2 0.9800 . ?
C12_2 C11_2 1.390(2) . ?
C12_2 H12_2 0.9500 . ?
C11_2 H11_2 0.9500 . ?
C8_3 C7_3 1.384(3) . ?
C8_3 C3_3 1.391(3) . ?
C8_3 H8_3 0.9500 . ?
C7_3 C6_3 1.396(3) . ?
C7_3 H7_3 0.9500 . ?
C6_3 C5_3 1.397(3) . ?
C6_3 C9_3 1.507(3) . ?
C9_3 H9A_3 0.9800 . ?
C9_3 H9B_3 0.9800 . ?
C9_3 H9C_3 0.9800 . ?
C5_3 C4_3 1.386(3) . ?
C5_3 H5_3 0.9500 . ?
C4_3 C3_3 1.396(2) . ?
C4_3 H4_3 0.9500 . ?
C3_3 S1_3 1.753(2) . ?
S1_3 O1_3 1.4340(17) . ?
S1_3 O2_3 1.4376(16) . ?
S1_3 C1_3 1.812(2) . ?
C1_3 N_3 1.418(2) . ?
C1_3 H1A_3 0.9900 . ?
C1_3 H1B_3 0.9900 . ?
C_3 N_3 1.158(2) . ?
C8_4 C7_4 1.389(2) . ?
C8_4 C3_4 1.391(2) . ?
C8_4 H8_4 0.9500 . ?
C7_4 C6_4 1.387(2) . ?
C7_4 H7_4 0.9500 . ?
C6_4 C5_4 1.407(2) . ?
C6_4 C9_4 1.499(2) . ?
C9_4 H9A_4 0.9800 . ?
C9_4 H9B_4 0.9800 . ?
C9_4 H9C_4 0.9800 . ?
C5_4 C4_4 1.385(2) . ?
C5_4 H5_4 0.9500 . ?
C4_4 C3_4 1.394(2) . ?
C4_4 H4_4 0.9500 . ?
C3_4 S1_4 1.7475(17) . ?
S1_4 O1_4 1.4334(14) . ?
S1_4 O2_4 1.4369(12) . ?
S1_4 C1_4 1.8087(19) . ?
C1_4 N_4 1.4182(19) . ?
C1_4 H1A_4 0.9900 . ?
C1_4 H1B_4 0.9900 . ?
C_4 N_4 1.155(2) . ?
 
loop_
 _geom_angle_atom_site_label_1
 _geom_angle_atom_site_label_2
 _geom_angle_atom_site_label_3
 _geom_angle
 _geom_angle_site_symmetry_1
 _geom_angle_site_symmetry_3
 _geom_angle_publ_flag
C_3 Pt_1 C_4 102.89(7) . . ?
C_3 Pt_1 C2_2 104.88(7) . . ?
C_4 Pt_1 C2_2 151.55(6) . . ?
C_3 Pt_1 C1_2 146.22(6) . . ?
C_4 Pt_1 C1_2 110.81(6) . . ?
C2_2 Pt_1 C1_2 41.38(6) . . ?
C7_2 C8_2 C3_2 119.35(16) . . ?
C7_2 C8_2 H8_2 120.3 . . ?
C3_2 C8_2 H8_2 120.3 . . ?
C8_2 C7_2 C6_2 120.71(16) . . ?
C8_2 C7_2 H7_2 119.6 . . ?
C6_2 C7_2 H7_2 119.6 . . ?
C5_2 C6_2 C7_2 119.11(16) . . ?
C5_2 C6_2 C9_2 120.1(2) . . ?
C7_2 C6_2 C9_2 120.79(19) . . ?
C6_2 C9_2 H9A_2 109.5 . . ?
C6_2 C9_2 H9B_2 109.5 . . ?
H9A_2 C9_2 H9B_2 109.5 . . ?
C6_2 C9_2 H9C_2 109.5 . . ?
H9A_2 C9_2 H9C_2 109.5 . . ?
H9B_2 C9_2 H9C_2 109.5 . . ?
C6_2 C5_2 C4_2 120.71(18) . . ?
C6_2 C5_2 H5_2 119.6 . . ?
C4_2 C5_2 H5_2 119.6 . . ?
C3_2 C4_2 C5_2 119.43(16) . . ?
C3_2 C4_2 H4_2 120.3 . . ?
C5_2 C4_2 H4_2 120.3 . . ?
C4_2 C3_2 C8_2 120.69(15) . . ?
C4_2 C3_2 S1_2 120.05(12) . . ?
C8_2 C3_2 S1_2 119.16(13) . . ?
O2_2 S1_2 O1_2 118.73(9) . . ?
O2_2 S1_2 C1_2 107.79(8) . . ?
O1_2 S1_2 C1_2 108.15(7) . . ?
O2_2 S1_2 C3_2 106.82(8) . . ?
O1_2 S1_2 C3_2 107.28(8) . . ?
C1_2 S1_2 C3_2 107.61(7) . . ?
C2_2 C1_2 S1_2 116.60(11) . . ?
C2_2 C1_2 Pt_1 68.72(8) . . ?
S1_2 C1_2 Pt_1 112.51(8) . . ?
C2_2 C1_2 H1_2 116.7 . . ?
S1_2 C1_2 H1_2 116.7 . . ?
Pt_1 C1_2 H1_2 116.7 . . ?
C1_2 C2_2 S2_2 120.44(11) . . ?
C1_2 C2_2 Pt_1 69.91(8) . . ?
S2_2 C2_2 Pt_1 120.09(8) . . ?
C1_2 C2_2 H2_2 113.3 . . ?
S2_2 C2_2 H2_2 113.3 . . ?
Pt_1 C2_2 H2_2 113.3 . . ?
O3_2 S2_2 O4_2 118.52(8) . . ?
O3_2 S2_2 C2_2 109.86(7) . . ?
O4_2 S2_2 C2_2 107.61(8) . . ?
O3_2 S2_2 C10_2 107.67(8) . . ?
O4_2 S2_2 C10_2 108.53(7) . . ?
C2_2 S2_2 C10_2 103.63(7) . . ?
C11_2 C10_2 C15_2 121.31(14) . . ?
C11_2 C10_2 S2_2 119.42(11) . . ?
C15_2 C10_2 S2_2 119.21(13) . . ?
C10_2 C15_2 C14_2 118.77(16) . . ?
C10_2 C15_2 H15_2 120.6 . . ?
C14_2 C15_2 H15_2 120.6 . . ?
C13_2 C14_2 C15_2 121.18(15) . . ?
C13_2 C14_2 H14_2 119.4 . . ?
C15_2 C14_2 H14_2 119.4 . . ?
C14_2 C13_2 C12_2 118.93(15) . . ?
C14_2 C13_2 C16_2 121.05(17) . . ?
C12_2 C13_2 C16_2 120.01(19) . . ?
C13_2 C16_2 H16A_2 109.5 . . ?
C13_2 C16_2 H16B_2 109.5 . . ?
H16A_2 C16_2 H16B_2 109.5 . . ?
C13_2 C16_2 H16C_2 109.5 . . ?
H16A_2 C16_2 H16C_2 109.5 . . ?
H16B_2 C16_2 H16C_2 109.5 . . ?
C11_2 C12_2 C13_2 121.00(17) . . ?
C11_2 C12_2 H12_2 119.5 . . ?
C13_2 C12_2 H12_2 119.5 . . ?
C12_2 C11_2 C10_2 118.81(14) . . ?
C12_2 C11_2 H11_2 120.6 . . ?
C10_2 C11_2 H11_2 120.6 . . ?
C7_3 C8_3 C3_3 118.96(17) . . ?
C7_3 C8_3 H8_3 120.5 . . ?
C3_3 C8_3 H8_3 120.5 . . ?
C8_3 C7_3 C6_3 121.36(19) . . ?
C8_3 C7_3 H7_3 119.3 . . ?
C6_3 C7_3 H7_3 119.3 . . ?
C7_3 C6_3 C5_3 118.47(19) . . ?
C7_3 C6_3 C9_3 120.98(19) . . ?
C5_3 C6_3 C9_3 120.54(19) . . ?
C6_3 C9_3 H9A_3 109.5 . . ?
C6_3 C9_3 H9B_3 109.5 . . ?
H9A_3 C9_3 H9B_3 109.5 . . ?
C6_3 C9_3 H9C_3 109.5 . . ?
H9A_3 C9_3 H9C_3 109.5 . . ?
H9B_3 C9_3 H9C_3 109.5 . . ?
C4_3 C5_3 C6_3 121.19(17) . . ?
C4_3 C5_3 H5_3 119.4 . . ?
C6_3 C5_3 H5_3 119.4 . . ?
C5_3 C4_3 C3_3 118.91(18) . . ?
C5_3 C4_3 H4_3 120.5 . . ?
C3_3 C4_3 H4_3 120.5 . . ?
C8_3 C3_3 C4_3 121.04(18) . . ?
C8_3 C3_3 S1_3 119.17(14) . . ?
C4_3 C3_3 S1_3 119.72(15) . . ?
O1_3 S1_3 O2_3 120.42(11) . . ?
O1_3 S1_3 C3_3 108.84(9) . . ?
O2_3 S1_3 C3_3 109.61(10) . . ?
O1_3 S1_3 C1_3 106.26(11) . . ?
O2_3 S1_3 C1_3 104.49(10) . . ?
C3_3 S1_3 C1_3 106.25(10) . . ?
N_3 C1_3 S1_3 109.78(13) . . ?
N_3 C1_3 H1A_3 109.7 . . ?
S1_3 C1_3 H1A_3 109.7 . . ?
N_3 C1_3 H1B_3 109.7 . . ?
S1_3 C1_3 H1B_3 109.7 . . ?
H1A_3 C1_3 H1B_3 108.2 . . ?
N_3 C_3 Pt_1 172.10(14) . . ?
C_3 N_3 C1_3 166.07(17) . . ?
C7_4 C8_4 C3_4 118.67(15) . . ?
C7_4 C8_4 H8_4 120.7 . . ?
C3_4 C8_4 H8_4 120.7 . . ?
C6_4 C7_4 C8_4 121.48(16) . . ?
C6_4 C7_4 H7_4 119.3 . . ?
C8_4 C7_4 H7_4 119.3 . . ?
C7_4 C6_4 C5_4 118.57(15) . . ?
C7_4 C6_4 C9_4 120.72(16) . . ?
C5_4 C6_4 C9_4 120.69(16) . . ?
C6_4 C9_4 H9A_4 109.5 . . ?
C6_4 C9_4 H9B_4 109.5 . . ?
H9A_4 C9_4 H9B_4 109.5 . . ?
C6_4 C9_4 H9C_4 109.5 . . ?
H9A_4 C9_4 H9C_4 109.5 . . ?
H9B_4 C9_4 H9C_4 109.5 . . ?
C4_4 C5_4 C6_4 121.00(15) . . ?
C4_4 C5_4 H5_4 119.5 . . ?
C6_4 C5_4 H5_4 119.5 . . ?
C5_4 C4_4 C3_4 118.85(15) . . ?
C5_4 C4_4 H4_4 120.6 . . ?
C3_4 C4_4 H4_4 120.6 . . ?
C8_4 C3_4 C4_4 121.37(15) . . ?
C8_4 C3_4 S1_4 118.66(12) . . ?
C4_4 C3_4 S1_4 119.89(12) . . ?
O1_4 S1_4 O2_4 120.54(8) . . ?
O1_4 S1_4 C3_4 109.72(8) . . ?
O2_4 S1_4 C3_4 109.54(8) . . ?
O1_4 S1_4 C1_4 107.10(8) . . ?
O2_4 S1_4 C1_4 104.46(8) . . ?
C3_4 S1_4 C1_4 104.09(8) . . ?
N_4 C1_4 S1_4 110.50(11) . . ?
N_4 C1_4 H1A_4 109.6 . . ?
S1_4 C1_4 H1A_4 109.6 . . ?
N_4 C1_4 H1B_4 109.6 . . ?
S1_4 C1_4 H1B_4 109.6 . . ?
H1A_4 C1_4 H1B_4 108.1 . . ?
N_4 C_4 Pt_1 175.32(14) . . ?
C_4 N_4 C1_4 174.16(17) . . ?
 
loop_
 _geom_torsion_atom_site_label_1
 _geom_torsion_atom_site_label_2
 _geom_torsion_atom_site_label_3
 _geom_torsion_atom_site_label_4
 _geom_torsion
 _geom_torsion_site_symmetry_1
 _geom_torsion_site_symmetry_2
 _geom_torsion_site_symmetry_3
 _geom_torsion_site_symmetry_4
 _geom_torsion_publ_flag
C3_2 C8_2 C7_2 C6_2 -0.3(3) . . . . ?
C8_2 C7_2 C6_2 C5_2 0.6(3) . . . . ?
C8_2 C7_2 C6_2 C9_2 -178.09(19) . . . . ?
C7_2 C6_2 C5_2 C4_2 -0.3(3) . . . . ?
C9_2 C6_2 C5_2 C4_2 178.4(2) . . . . ?
C6_2 C5_2 C4_2 C3_2 -0.3(3) . . . . ?
C5_2 C4_2 C3_2 C8_2 0.6(3) . . . . ?
C5_2 C4_2 C3_2 S1_2 -175.64(14) . . . . ?
C7_2 C8_2 C3_2 C4_2 -0.4(2) . . . . ?
C7_2 C8_2 C3_2 S1_2 175.96(13) . . . . ?
C4_2 C3_2 S1_2 O2_2 138.56(14) . . . . ?
C8_2 C3_2 S1_2 O2_2 -37.77(15) . . . . ?
C4_2 C3_2 S1_2 O1_2 10.25(15) . . . . ?
C8_2 C3_2 S1_2 O1_2 -166.09(13) . . . . ?
C4_2 C3_2 S1_2 C1_2 -105.92(14) . . . . ?
C8_2 C3_2 S1_2 C1_2 77.75(14) . . . . ?
O2_2 S1_2 C1_2 C2_2 28.75(13) . . . . ?
O1_2 S1_2 C1_2 C2_2 158.27(12) . . . . ?
C3_2 S1_2 C1_2 C2_2 -86.13(13) . . . . ?
O2_2 S1_2 C1_2 Pt_1 -47.84(9) . . . . ?
O1_2 S1_2 C1_2 Pt_1 81.68(10) . . . . ?
C3_2 S1_2 C1_2 Pt_1 -162.73(7) . . . . ?
S1_2 C1_2 C2_2 S2_2 140.83(9) . . . . ?
Pt_1 C1_2 C2_2 S2_2 -113.84(10) . . . . ?
S1_2 C1_2 C2_2 Pt_1 -105.33(10) . . . . ?
C1_2 C2_2 S2_2 O3_2 37.44(13) . . . . ?
Pt_1 C2_2 S2_2 O3_2 -45.67(11) . . . . ?
C1_2 C2_2 S2_2 O4_2 167.78(11) . . . . ?
Pt_1 C2_2 S2_2 O4_2 84.67(10) . . . . ?
C1_2 C2_2 S2_2 C10_2 -77.38(12) . . . . ?
Pt_1 C2_2 S2_2 C10_2 -160.49(8) . . . . ?
O3_2 S2_2 C10_2 C11_2 -32.22(14) . . . . ?
O4_2 S2_2 C10_2 C11_2 -161.66(12) . . . . ?
C2_2 S2_2 C10_2 C11_2 84.15(13) . . . . ?
O3_2 S2_2 C10_2 C15_2 150.36(12) . . . . ?
O4_2 S2_2 C10_2 C15_2 20.92(14) . . . . ?
C2_2 S2_2 C10_2 C15_2 -93.27(13) . . . . ?
C11_2 C10_2 C15_2 C14_2 -1.1(2) . . . . ?
S2_2 C10_2 C15_2 C14_2 176.25(12) . . . . ?
C10_2 C15_2 C14_2 C13_2 0.5(2) . . . . ?
C15_2 C14_2 C13_2 C12_2 0.6(3) . . . . ?
C15_2 C14_2 C13_2 C16_2 -178.19(16) . . . . ?
C14_2 C13_2 C12_2 C11_2 -1.0(3) . . . . ?
C16_2 C13_2 C12_2 C11_2 177.78(16) . . . . ?
C13_2 C12_2 C11_2 C10_2 0.4(2) . . . . ?
C15_2 C10_2 C11_2 C12_2 0.7(2) . . . . ?
S2_2 C10_2 C11_2 C12_2 -176.64(12) . . . . ?
C3_3 C8_3 C7_3 C6_3 -1.2(3) . . . . ?
C8_3 C7_3 C6_3 C5_3 2.6(3) . . . . ?
C8_3 C7_3 C6_3 C9_3 -176.17(18) . . . . ?
C7_3 C6_3 C5_3 C4_3 -1.7(3) . . . . ?
C9_3 C6_3 C5_3 C4_3 177.10(18) . . . . ?
C6_3 C5_3 C4_3 C3_3 -0.6(3) . . . . ?
C7_3 C8_3 C3_3 C4_3 -1.1(3) . . . . ?
C7_3 C8_3 C3_3 S1_3 175.78(15) . . . . ?
C5_3 C4_3 C3_3 C8_3 2.0(3) . . . . ?
C5_3 C4_3 C3_3 S1_3 -174.88(15) . . . . ?
C8_3 C3_3 S1_3 O1_3 -163.80(16) . . . . ?
C4_3 C3_3 S1_3 O1_3 13.17(19) . . . . ?
C8_3 C3_3 S1_3 O2_3 -30.21(18) . . . . ?
C4_3 C3_3 S1_3 O2_3 146.75(16) . . . . ?
C8_3 C3_3 S1_3 C1_3 82.15(16) . . . . ?
C4_3 C3_3 S1_3 C1_3 -100.89(16) . . . . ?
O1_3 S1_3 C1_3 N_3 -60.77(16) . . . . ?
O2_3 S1_3 C1_3 N_3 170.91(14) . . . . ?
C3_3 S1_3 C1_3 N_3 55.04(15) . . . . ?
S1_3 C1_3 N_3 C_3 -53.2(9) . . . . ?
C3_4 C8_4 C7_4 C6_4 1.0(3) . . . . ?
C8_4 C7_4 C6_4 C5_4 -2.3(3) . . . . ?
C8_4 C7_4 C6_4 C9_4 175.93(19) . . . . ?
C7_4 C6_4 C5_4 C4_4 1.3(3) . . . . ?
C9_4 C6_4 C5_4 C4_4 -176.93(18) . . . . ?
C6_4 C5_4 C4_4 C3_4 1.0(3) . . . . ?
C7_4 C8_4 C3_4 C4_4 1.4(3) . . . . ?
C7_4 C8_4 C3_4 S1_4 -175.37(14) . . . . ?
C5_4 C4_4 C3_4 C8_4 -2.3(3) . . . . ?
C5_4 C4_4 C3_4 S1_4 174.37(14) . . . . ?
C8_4 C3_4 S1_4 O1_4 -152.15(14) . . . . ?
C4_4 C3_4 S1_4 O1_4 31.06(16) . . . . ?
C8_4 C3_4 S1_4 O2_4 -17.72(16) . . . . ?
C4_4 C3_4 S1_4 O2_4 165.49(13) . . . . ?
C8_4 C3_4 S1_4 C1_4 93.52(15) . . . . ?
C4_4 C3_4 S1_4 C1_4 -83.27(15) . . . . ?
O1_4 S1_4 C1_4 N_4 -51.37(13) . . . . ?
O2_4 S1_4 C1_4 N_4 179.71(11) . . . . ?
C3_4 S1_4 C1_4 N_4 64.81(12) . . . . ?
 
_refine_diff_density_max    1.350
_refine_diff_density_min   -2.525
_refine_diff_density_rms    0.138

_shelx_res_file
;
TITL X4ESxT-14Jun123108_a.res in P-1
    XDS_ASCII_scaled511_unmerged.res
    created by SHELXL-2019/3 at 12:21:05 on 20-Aug-2023

REM Old TITL X4ESxT-14Jun123108 in P1
REM SHELXT solution in P-1: R1 0.106, Rweak 0.009, Alpha 0.030
REM <I/s>   0.000 for    0 systematic absences,  Orientation as input
REM Formula found by SHELXT:  C34 N4 O6 Cl4 Pt

CELL 0.62000  10.29500  13.98550  14.33450  62.5385  80.4735  75.9495
ZERR    2.00   0.00206   0.00280   0.00287   0.0300   0.0300   0.0300
LATT  1
SFAC  C  N  O  S  PT H
DISP    Pt   -0.84788    6.75574     24349.60
DISP    H     0.00000    0.00000         0.66
DISP    N     0.00416    0.00245        14.28
DISP    C     0.00201    0.00119         8.75
DISP    O     0.00771    0.00451        22.87
DISP    S     0.09937    0.09447       352.74
UNIT 68 4 16 8 2 68
L.S. 6
LIST 4
BOND $H
CONF
MERG 2
FMAP 2
rem PLAN   25
SHEL 180 0.66
ACTA
WPDB -2
TEMP -173.15
SIZE 0.1 0.05 0.02
REM HFIX_TOE 43 C11 C12 C14 C15 C4 C8 C5 C7
REM HFIX_2 13 C1 C2
REM HFIX_3 23 C1 C2
REM HFIX_4 23 C1 C2
REM HFIX_TOE 137 C9 C16

PLAN 20

REM Omit extracted on Sun Aug 20 12:06:55 2023
omit 6 1 2
omit 15 1 3
omit 14 1 7
omit 1 -3 4

REM Omit extracted on Sun Aug 20 12:10:36 2023
omit -1 2 4
omit 0 0 1
omit 1 4 3

REM Omit extracted on Sun Aug 20 12:20:50 2023
omit 3 1 1
omit 5 -2 1
omit -1 -2 5
omit 2 9 10
omit 5 -14 3
omit 4 5 3

WGHT    0.026000    0.554900
FVAR       0.26708
RESI    1   Pt
PT    5    0.356858    0.299936    0.461413    11.00000    0.01565    0.01886 =
         0.01260   -0.01136    0.00013   -0.00491

RESI    2   TOE
C8    1    0.692661    0.268301    0.153965    11.00000    0.01646    0.02663 =
         0.01684   -0.01286   -0.00115   -0.00540
AFIX  43
H8    6    0.602800    0.304101    0.137095    11.00000   -1.20000
AFIX   0
C7    1    0.777236    0.230246    0.087281    11.00000    0.02509    0.03105 =
         0.01797   -0.01560    0.00316   -0.01015
AFIX  43
H7    6    0.744741    0.239862    0.024640    11.00000   -1.20000
AFIX   0
C6    1    0.909576    0.177973    0.111223    11.00000    0.02206    0.02941 =
         0.02903   -0.01924    0.00876   -0.01009
C9    1    1.002974    0.139656    0.037152    11.00000    0.03195    0.05837 =
         0.05309   -0.04294    0.01614   -0.01204
AFIX 137
H9A   6    1.031772    0.059750    0.072755    11.00000   -1.50000
H9B   6    1.081641    0.174566    0.016008    11.00000   -1.50000
H9C   6    0.956183    0.159759   -0.025425    11.00000   -1.50000
AFIX   0
C5    1    0.955590    0.163469    0.203635    11.00000    0.01685    0.02968 =
         0.03597   -0.01892   -0.00205   -0.00135
AFIX  43
H5    6    1.045397    0.127655    0.220694    11.00000   -1.20000
AFIX   0
C4    1    0.871411    0.200893    0.271472    11.00000    0.01965    0.02497 =
         0.02331   -0.01187   -0.00557   -0.00363
AFIX  43
H4    6    0.903351    0.190402    0.334654    11.00000   -1.20000
AFIX   0
C3    1    0.740838    0.253493    0.246026    11.00000    0.01591    0.01748 =
         0.01476   -0.00882    0.00029   -0.00737
S1    4    0.636414    0.309752    0.326246    11.00000    0.01892    0.01767 =
         0.01405   -0.01015    0.00123   -0.00949
O1    3    0.720185    0.306362    0.399719    11.00000    0.02861    0.03702 =
         0.02086   -0.01797    0.00033   -0.01990
O2    3    0.562766    0.414640    0.256336    11.00000    0.02828    0.01569 =
         0.02089   -0.00979    0.00420   -0.00629
C1    1    0.520785    0.224038    0.398067    11.00000    0.01513    0.01640 =
         0.01219   -0.00866    0.00061   -0.00719
AFIX  13
H1    6    0.558514    0.145605    0.444115    11.00000   -1.20000
AFIX   0
C2    1    0.398635    0.245051    0.346766    11.00000    0.01580    0.01656 =
         0.01153   -0.00973   -0.00036   -0.00499
AFIX  13
H2    6    0.396606    0.305842    0.273572    11.00000   -1.20000
AFIX   0
S2    4    0.330181    0.135787    0.360613    11.00000    0.01155    0.01620 =
         0.01006   -0.00799   -0.00058   -0.00451
O4    3    0.197367    0.180621    0.321643    11.00000    0.01259    0.02565 =
         0.01888   -0.01120   -0.00320   -0.00352
O3    3    0.345078    0.048503    0.466214    11.00000    0.01659    0.01836 =
         0.00992   -0.00633    0.00010   -0.00540
C10   1    0.434040    0.088201    0.274139    11.00000    0.01542    0.01736 =
         0.01125   -0.00956    0.00050   -0.00636
C15   1    0.397423    0.128726    0.171467    11.00000    0.02265    0.02350 =
         0.01093   -0.00888   -0.00062   -0.00891
AFIX  43
H15   6    0.314839    0.178102    0.149336    11.00000   -1.20000
AFIX   0
C14   1    0.484205    0.095489    0.101787    11.00000    0.03203    0.02889 =
         0.01239   -0.01306    0.00352   -0.01381
AFIX  43
H14   6    0.460449    0.123088    0.031438    11.00000   -1.20000
AFIX   0
C13   1    0.604494    0.022917    0.133300    11.00000    0.02611    0.02907 =
         0.02011   -0.01878    0.01002   -0.01441
C16   1    0.699672   -0.010187    0.057185    11.00000    0.03555    0.04356 =
         0.03015   -0.02882    0.01706   -0.01918
AFIX 137
H16A  6    0.735776   -0.089148    0.091918    11.00000   -1.50000
H16B  6    0.773460    0.030344    0.033874    11.00000   -1.50000
H16C  6    0.651870    0.006648   -0.003894    11.00000   -1.50000
AFIX   0
C12   1    0.637945   -0.018045    0.237498    11.00000    0.01918    0.02901 =
         0.02302   -0.01859    0.00363   -0.00556
AFIX  43
H12   6    0.719551   -0.068741    0.260100    11.00000   -1.20000
AFIX   0
C11   1    0.553549    0.014368    0.308286    11.00000    0.01726    0.02425 =
         0.01589   -0.01349   -0.00006   -0.00482
AFIX  43
H11   6    0.577033   -0.013388    0.378730    11.00000   -1.20000
AFIX   0

RESI 3   TOE
C8    1    0.013361    0.437904    0.157590    11.00000    0.02213    0.02467 =
         0.03073   -0.00928   -0.00642   -0.00865
AFIX  43
H8    6   -0.072895    0.419116    0.172154    11.00000   -1.20000
AFIX   0
C7    1    0.107649    0.406867    0.090886    11.00000    0.03015    0.02501 =
         0.02489   -0.00857   -0.00762   -0.00628
AFIX  43
H7    6    0.085915    0.365242    0.060761    11.00000   -1.20000
AFIX   0
C6    1    0.234018    0.435470    0.066969    11.00000    0.02887    0.02116 =
         0.01656   -0.00214   -0.00432   -0.00400
C9    1    0.332869    0.407405   -0.010913    11.00000    0.03936    0.03035 =
         0.01975   -0.00601    0.00151   -0.00448
AFIX 137
H9A   6    0.350011    0.475180   -0.071956    11.00000   -1.50000
H9B   6    0.295826    0.364108   -0.034003    11.00000   -1.50000
H9C   6    0.417063    0.364673    0.022562    11.00000   -1.50000
AFIX   0
C5    1    0.266100    0.492774    0.115406    11.00000    0.02106    0.02548 =
         0.02407   -0.00663   -0.00090   -0.00737
AFIX  43
H5    6    0.352587    0.511068    0.101335    11.00000   -1.20000
AFIX   0
C4    1    0.174036    0.523426    0.183624    11.00000    0.01860    0.02603 =
         0.02976   -0.01249   -0.00043   -0.00852
AFIX  43
H4    6    0.197123    0.561784    0.216683    11.00000   -1.20000
AFIX   0
C3    1    0.046866    0.497020    0.202954    11.00000    0.01663    0.02158 =
         0.02706   -0.00889   -0.00277   -0.00603
S1    4   -0.075591    0.544436    0.280423    11.00000    0.01494    0.02617 =
         0.03902   -0.01609    0.00053   -0.00665
O1    3   -0.031526    0.627181    0.293200    11.00000    0.02981    0.03494 =
         0.06442   -0.03253    0.01224   -0.01577
O2    3   -0.205883    0.565781    0.243312    11.00000    0.01713    0.03672 =
         0.04548   -0.01268   -0.00455   -0.00320
C1    1   -0.079644    0.429784    0.410064    11.00000    0.01433    0.03928 =
         0.03225   -0.01979    0.00040   -0.01093
AFIX  23
H1A   6   -0.142516    0.453648    0.458857    11.00000   -1.20000
H1B   6   -0.111779    0.370577    0.406160    11.00000   -1.20000
AFIX   0
C     1    0.164122    0.355932    0.460455    11.00000    0.01892    0.02570 =
         0.01998   -0.01597    0.00082   -0.00776
N     2    0.050673    0.389723    0.448439    11.00000    0.01749    0.03517 =
         0.02617   -0.01997    0.00099   -0.00886

RESI    4   TOE
C8    1    0.835212    0.228271    0.733057    11.00000    0.01640    0.02910 =
         0.02801   -0.02043    0.00175   -0.00731
AFIX  43
H8    6    0.848205    0.269866    0.766509    11.00000   -1.20000
AFIX   0
C7    1    0.942010    0.187107    0.680329    11.00000    0.01571    0.03202 =
         0.02933   -0.01996    0.00293   -0.00676
AFIX  43
H7    6    1.028931    0.199955    0.678971    11.00000   -1.20000
AFIX   0
C6    1    0.924571    0.127663    0.629618    11.00000    0.01977    0.02110 =
         0.02084   -0.01245    0.00422   -0.00482
C9    1    1.038998    0.090303    0.567159    11.00000    0.02920    0.03158 =
         0.03060   -0.02008    0.00971   -0.00601
AFIX 137
H9A   6    1.019945    0.029513    0.558667    11.00000   -1.50000
H9B   6    1.121431    0.065621    0.604284    11.00000   -1.50000
H9C   6    1.050445    0.151343    0.497680    11.00000   -1.50000
AFIX   0
C5    1    0.796278    0.105814    0.635675    11.00000    0.02341    0.02280 =
         0.02582   -0.01716    0.00258   -0.00632
AFIX  43
H5    6    0.783266    0.063864    0.602608    11.00000   -1.20000
AFIX   0
C4    1    0.688675    0.144530    0.689106    11.00000    0.01981    0.02099 =
         0.02307   -0.01487    0.00145   -0.00700
AFIX  43
H4    6    0.602585    0.128553    0.693803    11.00000   -1.20000
AFIX   0
C3    1    0.708870    0.207355    0.735882    11.00000    0.01528    0.01925 =
         0.01704   -0.01177    0.00088   -0.00454
S1    4    0.572360    0.267450    0.793767    11.00000    0.01534    0.02174 =
         0.01325   -0.01174    0.00165   -0.00661
O1    3    0.472305    0.200062    0.834894    11.00000    0.02127    0.02801 =
         0.01988   -0.01258    0.00585   -0.01213
O2    3    0.619957    0.303406    0.858787    11.00000    0.02178    0.03386 =
         0.01916   -0.01902   -0.00255   -0.00508
C1    1    0.502868    0.393058    0.684603    11.00000    0.01725    0.02068 =
         0.01795   -0.01402   -0.00225   -0.00390
AFIX  23
H1A   6    0.429750    0.436432    0.711430    11.00000   -1.20000
H1B   6    0.573299    0.437483    0.647744    11.00000   -1.20000
AFIX   0
C     1    0.413693    0.340835    0.560499    11.00000    0.01743    0.02061 =
         0.01548   -0.01186    0.00037   -0.00347
N     2    0.452118    0.369429    0.612961    11.00000    0.01794    0.02187 =
         0.01813   -0.01335   -0.00118   -0.00386

HKLF 4


REM  X4ESxT-14Jun123108_a.res in P-1
REM wR2 = 0.0538, GooF = S = 1.038, Restrained GooF = 1.038 for all data
REM R1 = 0.0215 for 12023 Fo > 4sig(Fo) and 0.0230 for all 12650 data
REM 446 parameters refined using 0 restraints

END

WGHT      0.0258      0.5512

REM Highest difference peak  1.350,  deepest hole -2.525,  1-sigma level  0.138
Q1    1   0.3813  0.3474  0.4198  11.00000  0.05    1.35
Q2    1   0.2914  0.2566  0.5202  11.00000  0.05    0.87
Q3    1   0.3569  0.2478  0.5141  11.00000  0.05    0.87
Q4    1   0.4135  0.2756  0.4407  11.00000  0.05    0.85
Q5    1  -0.0593  0.5028  0.3475  11.00000  0.05    0.66
Q6    1  -0.0363  0.5809  0.2942  11.00000  0.05    0.65
Q7    1   0.3446  0.0955  0.4137  11.00000  0.05    0.60
Q8    1   0.2435  0.3037  0.4622  11.00000  0.05    0.59
Q9    1   0.4514  0.2960  0.4485  11.00000  0.05    0.58
Q10   1   0.3687  0.1812  0.3625  11.00000  0.05    0.53
Q11   1   0.4154  0.0880  0.2333  11.00000  0.05    0.52
Q12   1   0.4433  0.1141  0.1363  11.00000  0.05    0.52
Q13   1   0.7284  0.2714  0.1926  11.00000  0.05    0.50
Q14   1   0.3172  0.3177  0.4213  11.00000  0.05    0.50
Q15   1   0.1119  0.3887  0.4192  11.00000  0.05    0.49
Q16   1   1.1433 -0.0020  0.1680  11.00000  0.05    0.48
Q17   1   0.3014  0.3324  0.4916  11.00000  0.05    0.46
Q18   1   0.4582  0.2138  0.4973  11.00000  0.05    0.46
Q19   1   0.9151  0.1880  0.2320  11.00000  0.05    0.46
Q20   1   0.6173  0.4098  0.2262  11.00000  0.05    0.45
;
_shelx_res_checksum   39826

_shelx_hkl_file
;
 -16  -8   1   26.57    2.61
  16   8  -1   31.55    2.69
 -16  -8   2    5.82    1.62
  16   8  -2    6.22    1.44
 -16  -7   1    4.83    1.62
 -16  -7   2   20.25    2.28
  16   7  -2   23.77    2.37
  16   7  -3   82.36    5.35
 -16  -6   1  111.37    6.76
 -16  -6   2  109.92    6.82
 -16  -6   3   21.79    2.50
  16   6  -3   31.98    2.72
 -16  -5   1    8.86    1.87
 -16  -5   1   -0.75    2.98
  16   5  -1   12.28    1.86
 -16  -5   2    7.52    1.35
 -16  -5   2    8.53    1.81
  16   5  -2    6.97    1.60
 -16  -5   3   22.64    2.55
  16   5  -4   62.08    4.31
  16   4  -1  138.73    7.78
  16   4  -1  109.52    7.50
 -16  -4   2   37.72    2.95
 -16  -4   2   26.92    3.04
  16   4  -2   37.02    3.02
  16   4  -3   45.11    3.43
 -16  -4   4  167.53    9.90
 -16  -3   1   25.46    2.77
 -16  -3   1   13.21    4.28
 -16  -3   2    5.32    1.98
 -16  -3   3    4.07    1.18
 -16  -3   3    3.97    1.79
 -16  -3   4    0.00    1.07
 -16  -3   4   -1.30    1.75
 -15 -10   1   50.11    3.63
 -15  -9   1    8.07    1.72
  15   9  -1   14.58    1.89
 -15  -9   2   18.30    2.23
  15   9  -2   21.16    2.18
 -15  -8   1    0.79    0.66
 -15  -8   1    1.30    1.36
  15   8  -1    0.63    1.02
 -15  -8   2    9.77    1.36
 -15  -8   2    8.47    1.61
  15   8  -2   10.06    1.61
 -15  -8   3   13.01    1.94
  15   8  -3   14.74    1.95
 -15  -7   1   33.13    2.68
 -15  -7   1   27.46    2.71
  15   7  -1   37.08    2.95
 -15  -7   2   19.10    1.91
 -15  -7   2   14.61    2.07
  15   7  -2   19.07    2.16
 -15  -7   3  138.24    7.64
 -15  -7   3  109.58    6.78
  15   7  -3  124.03    7.23
 -15  -7   4   81.86    5.35
  15   7  -4   98.76    5.87
 -15  -6   1    7.55    1.23
 -15  -6   1    7.02    1.71
  15   6  -1    6.98    1.62
 -15  -6   2    4.71    1.08
 -15  -6   2    3.92    1.59
  15   6  -2    5.83    1.51
 -15  -6   3    2.89    0.81
 -15  -6   3    3.03    1.34
  15   6  -3    1.85    1.30
 -15  -6   4    1.62    0.79
 -15  -6   4    1.42    1.15
  15   6  -4    2.60    1.11
 -15  -6   5   27.70    2.75
  15   6  -5   29.01    2.58
 -15  -5   1   42.81    3.24
 -15  -5   1   46.48    3.51
  15   5  -1   49.06    3.62
  15   5  -1   47.79    4.10
 -15  -5   2   75.32    4.89
 -15  -5   2   75.18    5.05
  15   5  -2   92.79    5.58
  15   5  -2   83.70    5.93
 -15  -5   3  128.54    7.43
 -15  -5   3  114.56    7.11
  15   5  -3  150.34    8.13
 -15  -5   4   45.51    3.31
 -15  -5   4   41.45    3.42
  15   5  -4   46.81    3.46
 -15  -5   5   36.18    2.95
 -15  -5   5   29.67    2.91
  15   5  -5   40.84    3.10
 -15  -5   6   65.02    4.59
  15   5  -6   78.15    4.90
 -15  -4   1   62.09    4.15
 -15  -4   1   58.89    4.25
  15   4  -1   69.36    4.58
  15   4  -1   71.34    5.18
 -15  -4   2   29.90    2.59
 -15  -4   2   32.21    2.89
  15   4  -2   37.05    3.05
  15   4  -2   32.96    3.49
 -15  -4   3   23.29    2.10
 -15  -4   3   15.64    2.27
  15   4  -3   22.72    2.40
  15   4  -3   18.10    2.78
 -15  -4   4    4.50    1.05
 -15  -4   4    4.61    1.61
  15   4  -4    5.25    1.36
 -15  -4   5    0.72    0.71
 -15  -4   5   -0.18    1.35
  15   4  -5    1.77    1.13
 -15  -4   6   -1.55    1.33
  15   4  -6    1.02    1.06
 -15  -4   7   -0.92    1.42
  15   4  -7    0.69    1.12
 -15  -3   1   12.20    2.03
  15   3  -1   13.50    1.86
  15   3  -1    7.39    1.96
 -15  -3   2    1.13    0.80
 -15  -3   2    1.60    1.36
  15   3  -2   -0.13    1.23
  15   3  -2    2.94    1.64
 -15  -3   3   30.52    2.60
 -15  -3   3   32.17    3.09
  15   3  -3   36.61    3.02
  15   3  -3   32.91    3.39
 -15  -3   4   38.63    3.06
 -15  -3   4   44.51    3.70
  15   3  -4   52.18    3.73
  15   3  -4   50.09    4.43
 -15  -3   5   38.31    3.01
 -15  -3   5   36.56    3.34
  15   3  -5   38.78    3.15
 -15  -3   6  121.57    6.97
 -15  -3   6   97.58    6.56
  15   3  -6  113.29    6.69
 -15  -3   7  124.34    7.66
  15   3  -7  156.82    8.51
 -15  -2   1   57.29    4.13
 -15  -2   1   41.57    5.61
  15   2  -1   69.28    4.35
  15   2  -1   50.37    4.23
 -15  -2   2   17.68    1.84
 -15  -2   2   15.77    2.30
  15   2  -2   19.61    2.20
  15   2  -2   15.33    2.63
 -15  -2   3   31.82    2.62
 -15  -2   3   26.71    2.86
  15   2  -3   34.36    2.80
  15   2  -3   32.49    3.49
 -15  -2   4   85.54    5.48
 -15  -2   4   91.28    6.02
  15   2  -4  110.23    6.43
  15   2  -4  104.98    7.13
 -15  -2   5   68.67    4.54
 -15  -2   5   64.90    4.71
  15   2  -5   71.16    4.74
 -15  -2   6    5.18    1.16
 -15  -2   6    4.41    1.73
 -15  -2   7    0.74    0.78
 -15  -2   7    3.46    1.66
 -15  -1   1   15.01    2.29
 -15  -1   1   13.08    4.15
  15   1  -1   28.49    2.47
  15   1  -1   24.24    2.87
 -15  -1   2    3.02    1.59
  15   1  -2    2.74    1.35
  15   1  -2    2.11    1.88
 -15  -1   3    0.12    0.62
 -15  -1   3    1.55    1.82
  15   1  -3    0.94    1.23
  15   1  -3    0.92    1.56
 -15  -1   4    3.77    0.98
 -15  -1   4    3.88    1.74
  15   1  -4    2.85    1.39
  15   1  -4    3.88    1.87
 -15  -1   5    1.65    0.81
 -15  -1   5    1.11    1.64
  15   1  -5    2.61    1.25
  15   1  -5    1.24    1.67
 -15  -1   6   87.07    5.36
 -15  -1   6   81.65    5.50
  15   1  -6   73.28    5.00
 -15  -1   7  144.36    8.31
 -15  -1   7  126.95    7.92
  15   1  -7  145.25    8.29
 -15   0   1   12.40    3.84
  15   0  -1   10.35    2.21
 -15   0   2   21.06    2.57
  15   0  -2   33.82    2.66
 -15   0   3   95.32    5.68
 -15   0   3   85.24    5.65
  15   0  -3   98.71    5.83
  15   0  -3   83.57    6.27
 -15   0   4  151.50    8.52
 -15   0   4  137.35    8.43
  15   0  -4  167.91    9.11
  15   0  -4  155.89    9.70
 -15   0   5   86.96    5.43
 -15   0   5   86.24    5.84
  15   0  -5   90.62    5.62
  15   0  -5   84.57    6.40
  15   0  -6   27.73    2.75
 -15   0   7   28.21    3.27
 -15   1   3    7.61    1.84
 -15   1   4    2.02    0.84
 -15   1   4   -0.24    1.60
 -15   1   5   -0.02    0.61
 -14 -11   1   43.90    3.40
  14  11  -1   52.05    3.57
 -14 -11   2   64.37    4.57
  14  11  -2   88.31    5.22
 -14 -10   1  186.13   10.03
 -14 -10   1  168.44    9.50
  14  10  -1  175.46    9.68
 -14 -10   2   37.67    2.98
  14  10  -2   36.47    2.94
 -14 -10   3    8.63    1.68
  14  10  -3    9.84    1.56
 -14  -9   1   15.54    1.64
 -14  -9   1   14.68    1.86
  14   9  -1   11.29    1.65
 -14  -9   2    7.94    1.22
 -14  -9   3    0.35    1.13
  14   9  -3    0.22    1.05
 -14  -9   4    5.82    1.57
  14   9  -4    7.14    1.46
 -14  -8   1   50.18    3.64
  14   8  -1   57.08    3.80
 -14  -8   2  133.11    7.59
 -14  -8   2  124.03    7.33
  14   8  -2  138.21    7.75
 -14  -8   3   42.88    3.16
 -14  -8   4   22.89    2.47
  14   8  -4   30.74    2.64
 -14  -8   5  106.45    6.49
  14   8  -5  119.63    6.86
 -14  -7   1   66.64    4.29
 -14  -7   1   58.91    4.21
  14   7  -1   61.24    4.72
 -14  -7   2   27.03    2.42
  14   7  -2   21.96    2.22
 -14  -7   3    2.49    0.91
 -14  -7   3    2.52    1.39
  14   7  -3    3.62    1.30
 -14  -7   4    0.49    0.56
 -14  -7   5   -1.57    1.11
  14   7  -5   -0.04    0.97
 -14  -7   6    0.66    1.22
  14   7  -6    0.64    0.95
 -14  -6   1   21.62    2.00
 -14  -6   1   18.83    2.23
  14   6  -1   24.03    2.36
  14   6  -1   20.72    2.64
 -14  -6   2  101.73    6.07
 -14  -6   3   67.69    4.47
 -14  -6   3   67.62    4.45
 -14  -6   4   74.81    4.73
 -14  -6   4   63.24    4.46
  14   6  -4   81.49    5.11
 -14  -6   5  112.93    6.65
 -14  -6   6   62.66    4.32
 -14  -6   7   29.78    3.09
  14   6  -7   41.06    3.08
 -14  -5   1   93.52    5.63
 -14  -5   1   88.46    5.51
  14   5  -1   97.41    5.79
  14   5  -1   87.24    5.86
 -14  -5   2   82.69    5.01
 -14  -5   2   65.85    4.62
  14   5  -2   84.09    5.14
  14   5  -2   79.89    5.49
 -14  -5   3   69.44    4.49
  14   5  -3   74.09    5.32
 -14  -5   4   29.51    2.58
 -14  -5   4   28.15    2.70
  14   5  -4   29.81    2.65
 -14  -5   5    1.56    0.72
 -14  -5   5    2.89    1.25
  14   5  -5    2.13    1.23
 -14  -5   6    1.18    0.71
 -14  -5   6    0.43    1.47
 -14  -5   7   -0.49    1.37
  14   5  -7    1.50    1.02
 -14  -4   1    1.21    0.72
 -14  -4   1    1.70    1.30
  14   4  -1    1.23    1.17
  14   4  -1    2.00    1.32
 -14  -4   2   62.63    4.19
 -14  -4   2   63.82    4.30
  14   4  -2   70.28    4.50
 -14  -4   3   13.54    1.57
 -14  -4   3   11.24    1.79
  14   4  -3   14.54    1.88
  14   4  -3   11.96    2.09
 -14  -4   4    7.56    1.21
  14   4  -4    3.99    1.71
 -14  -4   5   40.72    3.30
  14   4  -5   39.86    3.14
 -14  -4   6   64.70    4.36
 -14  -4   6   66.54    4.59
  14   4  -6   77.30    4.83
 -14  -4   7   38.57    2.97
 -14  -4   7   28.65    2.87
  14   4  -7   43.79    3.23
 -14  -4   8   98.49    6.18
  14   4  -8  100.35    6.08
 -14  -3   1  159.49    9.00
 -14  -3   1  166.85    9.24
  14   3  -1  185.49    9.82
  14   3  -1  160.39    9.55
 -14  -3   2  141.56    8.04
 -14  -3   2  133.19    7.90
  14   3  -2  161.63    8.70
  14   3  -2  148.35    8.83
 -14  -3   3   99.45    6.12
  14   3  -3  109.22    6.37
 -14  -3   4   37.40    2.76
 -14  -3   4   26.64    2.78
  14   3  -4   35.39    2.83
  14   3  -4   23.77    3.00
 -14  -3   5   18.37    1.86
  14   3  -5   20.42    2.69
 -14  -3   6   74.09    4.80
 -14  -3   6   75.61    4.96
  14   3  -6   84.97    5.23
 -14  -3   7   77.10    4.91
 -14  -3   7   69.17    4.83
  14   3  -7   83.26    5.19
 -14  -3   8    1.11    1.39
  14   3  -8   -0.14    1.15
 -14  -3   9    6.01    1.75
  14   3  -9    5.25    1.36
 -14  -2   1   12.28    1.46
 -14  -2   1    9.98    1.72
  14   2  -1   13.96    1.77
  14   2  -1    9.14    1.89
 -14  -2   2    7.26    1.16
 -14  -2   2    4.54    1.49
  14   2  -2    9.54    1.54
  14   2  -2    4.19    1.55
 -14  -2   3   14.55    1.61
 -14  -2   3   13.76    2.00
  14   2  -3   16.48    1.91
  14   2  -3   11.01    2.09
 -14  -2   4    0.58    0.55
 -14  -2   4    1.01    1.25
  14   2  -4   -0.38    1.01
 -14  -2   5   13.31    1.59
 -14  -2   5   13.77    1.99
  14   2  -5   13.82    1.97
  14   2  -5   14.32    2.34
 -14  -2   6    5.11    1.05
 -14  -2   6    5.87    1.75
  14   2  -6    4.15    1.43
  14   2  -6    3.85    1.59
 -14  -2   7    8.14    1.27
 -14  -2   7    7.99    1.85
  14   2  -7    8.61    1.60
 -14  -2   8   96.98    5.94
 -14  -2   9  169.77    9.66
  14   2  -9  171.56    9.56
 -14  -1   1   16.79    2.15
  14   1  -1   18.72    1.97
  14   1  -1   16.25    2.07
 -14  -1   2   39.85    2.88
 -14  -1   2   34.25    2.96
  14   1  -2   38.13    2.97
  14   1  -2   40.97    3.53
 -14  -1   3   56.93    3.91
 -14  -1   3   65.22    4.42
  14   1  -3   71.91    4.50
  14   1  -3   60.52    4.60
 -14  -1   4   84.43    5.39
 -14  -1   4   94.95    5.91
  14   1  -4  105.18    6.10
  14   1  -4   94.29    6.38
 -14  -1   5   87.17    5.51
 -14  -1   5   91.39    5.84
  14   1  -5  106.90    6.22
  14   1  -5  100.97    6.70
 -14  -1   6  126.75    7.58
 -14  -1   6  139.38    8.22
  14   1  -6  164.96    8.84
  14   1  -6  145.85    8.96
 -14  -1   7   56.22    3.82
 -14  -1   7   49.71    3.93
  14   1  -7   52.02    3.76
 -14  -1   8   12.29    1.55
 -14  -1   8    9.87    1.91
  14   1  -8   11.38    1.73
 -14  -1   9   23.84    2.22
 -14  -1   9   19.09    2.52
  14   1  -9   24.10    2.37
 -14  -1  10    8.73    2.18
  14   1 -10   11.72    1.89
 -14   0   1  163.97    9.30
 -14   0   1  145.27   10.39
  14   0  -1  189.43    9.85
  14   0  -1  188.88   10.27
 -14   0   2   75.08    4.68
 -14   0   2   74.22    5.02
  14   0  -2   92.13    5.36
  14   0  -2   76.67    5.34
 -14   0   3   53.41    3.64
 -14   0   3   52.53    4.04
  14   0  -3   64.65    4.12
  14   0  -3   54.64    4.28
 -14   0   4   43.07    3.12
 -14   0   4   44.13    3.54
  14   0  -4   46.21    3.39
  14   0  -4   38.99    3.74
 -14   0   5    4.84    1.06
 -14   0   5    5.55    1.63
  14   0  -5    5.44    1.36
  14   0  -5    2.16    1.67
 -14   0   6    0.32    0.61
 -14   0   6   -0.09    1.25
  14   0  -6    0.81    1.03
  14   0  -6    0.12    1.32
 -14   0   7   -0.40    0.61
 -14   0   7   -0.93    1.48
  14   0  -7    0.11    1.06
  14   0  -7   -0.27    1.42
 -14   0   8    0.83    1.56
  14   0  -8    0.65    1.06
 -14   0   9   28.47    2.45
 -14   0   9   24.18    2.87
  14   0  -9   27.53    2.60
 -14   0  10   20.89    2.62
  14   0 -10   22.75    2.45
 -14   1   1   13.09    1.76
 -14   1   1    5.35    3.01
  14  -1  -1   18.25    1.70
  14  -1  -1   11.25    1.88
 -14   1   2   13.20    1.93
  14  -1  -2   14.30    1.61
  14  -1  -2   13.98    2.01
 -14   1   3   60.88    4.00
 -14   1   3   60.83    4.35
  14  -1  -3   76.62    4.59
  14  -1  -3   68.89    4.89
 -14   1   4   35.27    2.66
 -14   1   4   31.03    2.94
  14  -1  -4   40.53    3.00
  14  -1  -4   32.06    3.26
 -14   1   5   20.42    1.90
 -14   1   5   18.01    2.33
  14  -1  -5   22.85    2.18
  14  -1  -5   14.09    2.64
 -14   1   6   71.87    4.69
 -14   1   6   67.48    4.87
  14  -1  -6   80.96    5.06
  14  -1  -6   87.92    6.05
 -14   1   7  141.86    8.35
 -14   1   7  148.83    8.84
  14  -1  -7  170.42    9.21
  14  -1  -7  165.07    9.87
 -14   1   8   74.93    4.81
 -14   1   8   64.96    4.91
  14  -1  -8   78.83    5.04
  14  -1  -8   80.02    5.80
 -14   1   9  106.45    6.46
 -14   1   9  107.68    6.84
  14  -1  -9  112.86    6.72
  14  -1 -10   85.23    5.58
 -14   2   2  121.71    7.24
  14  -2  -2  140.26    7.50
 -14   2   3  145.03    7.85
 -14   2   3  131.70    7.77
 -14   2   4   28.20    2.32
 -14   2   4   23.96    2.57
  14  -2  -4   29.82    2.51
  14  -2  -4   29.28    3.14
 -14   2   5    4.21    0.94
 -14   2   5    1.81    1.36
  14  -2  -5    4.17    1.26
  14  -2  -5    1.55    1.64
 -14   2   6   26.83    2.28
  14  -2  -6   24.63    2.51
  14  -2  -6   19.50    2.93
 -14   2   7   62.34    4.82
  14  -2  -7   86.92    5.28
 -14   2   8    9.93    1.43
 -14   2   8   10.34    2.14
  14  -2  -8   11.89    1.77
  14  -2  -8    9.26    2.19
 -14   2   9    0.32    1.57
  14  -2  -9    0.78    1.03
 -14   2  10    0.05    0.77
 -14   2  10   -0.73    1.52
  14  -2 -10    1.76    1.27
 -14   3   2    1.74    1.37
 -14   3   2    2.12    2.15
 -14   3   3    0.93    1.49
 -14   3   3   -0.06    2.76
  14  -3  -3   -0.09    0.76
  14  -3  -3    0.07    1.17
 -14   3   4    0.13    0.69
 -14   3   4    2.09    1.48
  14  -3  -4    1.43    0.88
  14  -3  -4   -1.07    1.67
 -14   3   5    0.25    0.65
 -14   3   5   -0.48    1.23
  14  -3  -5    0.53    0.89
  14  -3  -5   -0.16    1.50
 -14   3   6    6.47    1.17
 -14   3   6    7.99    1.83
  14  -3  -6    6.28    1.43
  14  -3  -6    2.34    2.04
 -14   3   7    6.65    1.21
 -14   3   7    5.65    1.93
 -14   3   8  102.48    6.13
 -14   3   8   94.94    6.63
 -14   3   9  103.37    6.33
 -13 -13   1  140.05    8.40
  13  13  -1  172.49    9.22
  13  13  -1  115.66   36.23
  13  13  -1  156.95   13.97
 -13 -12   1    2.36    1.18
 -13 -12   1    3.43    3.46
 -13 -12   1    3.33    1.71
  13  12  -1    3.97    1.10
  13  12  -1   -2.29   22.72
  13  12  -1    3.76    2.04
 -13 -12   2    1.18    1.14
  13  12  -2    0.74    0.93
  13  12  -2    8.37   33.72
  13  12  -2   -0.33    1.57
  13  12  -3   41.33   37.65
  13  12  -3   59.63    7.55
 -13 -11   1  236.29   12.30
 -13 -11   1  233.03   19.38
 -13 -11   1  198.24   17.38
  13  11  -1  203.95   37.54
  13  11  -1  226.55   18.41
 -13 -11   2  202.32   10.88
 -13 -11   2  201.00   17.97
 -13 -11   2  185.39   16.23
  13  11  -2  201.24   10.80
  13  11  -2  149.85   38.06
  13  11  -2  211.63   17.33
 -13 -11   3  124.03    7.17
 -13 -11   3  114.72   13.02
 -13 -11   3  114.58   11.60
  13  11  -3  136.03    7.50
  13  11  -3   96.42   38.70
  13  11  -3  127.49   12.31
  13  11  -4   -8.91   33.47
  13  11  -4   23.26    4.76
 -13 -10   1   26.97    2.36
 -13 -10   1   30.96    2.58
  13  10  -1   32.48    2.61
  13  10  -1    2.24   23.94
 -13 -10   2    0.07    0.56
 -13 -10   2    1.37    1.12
 -13 -10   2    1.80    2.62
 -13 -10   2    0.77    1.20
  13  10  -2    1.05    1.06
  13  10  -2   -6.54   28.83
  13  10  -2    1.61    2.26
 -13 -10   3   19.42    1.85
 -13 -10   3   18.92    2.11
 -13 -10   3   14.46    3.61
  13  10  -3   21.50    2.12
  13  10  -3   19.02    4.63
 -13 -10   4   34.00    2.87
 -13 -10   4   25.76    6.71
  13  10  -4   41.69    3.08
  13  10  -4   52.81   36.27
  13  10  -4   40.44    6.67
  13  10  -5  -12.09   32.91
  13  10  -5   -0.60    2.68
 -13  -9   1  174.33    9.08
 -13  -9   1  153.92    8.41
 -13  -9   1  131.65   13.09
 -13  -9   1  123.41   12.43
  13   9  -1  162.92    8.60
  13   9  -1  121.50   23.72
  13   9  -1  143.76   13.67
 -13  -9   2  111.97    6.29
 -13  -9   2  100.30    5.94
 -13  -9   2   95.60   10.48
 -13  -9   2   79.87    9.45
  13   9  -2  112.71    6.27
  13   9  -2   98.51   30.14
  13   9  -2   95.62   10.67
 -13  -9   3   52.07    3.61
 -13  -9   3   54.91    3.79
 -13  -9   3   49.35    7.53
 -13  -9   3   49.10    6.66
  13   9  -3   64.54    4.08
  13   9  -3   62.32   33.81
  13   9  -3   56.39    7.86
 -13  -9   4   51.66    3.54
 -13  -9   4   54.63    3.72
 -13  -9   4   39.67    6.25
  13   9  -4   54.85    3.72
  13   9  -4   57.39    8.06
 -13  -9   5   39.80    3.17
  13   9  -5   47.51    3.39
  13   9  -5   -6.57   30.69
  13   9  -5   39.77    7.63
 -13  -8   1   72.18    4.49
 -13  -8   1   59.08    7.33
 -13  -8   1   60.80    7.24
  13   8  -1   70.66    4.49
  13   8  -1   69.06    4.84
  13   8  -1   50.29   12.46
  13   8  -1   64.45    8.70
 -13  -8   2  183.43   10.02
 -13  -8   2  176.12    9.74
 -13  -8   2  190.46   16.05
 -13  -8   2  164.17   15.01
  13   8  -2  197.18   10.34
  13   8  -2  188.37   27.84
  13   8  -2  184.86   16.91
 -13  -8   3   57.27    3.81
 -13  -8   3   49.76    3.62
 -13  -8   3   63.51    7.89
 -13  -8   3   45.39    6.61
  13   8  -3   64.26    4.06
  13   8  -3   15.10   33.39
  13   8  -3   49.99    8.32
 -13  -8   4   14.25    1.60
 -13  -8   4   12.07    1.76
 -13  -8   4   18.98    4.25
 -13  -8   4    8.56    3.18
  13   8  -4   19.31    1.99
  13   8  -4    7.11   32.77
  13   8  -4   12.06    5.82
 -13  -8   5   21.60    2.00
 -13  -8   5   23.82    2.42
 -13  -8   5   18.09    4.13
  13   8  -5   24.38    2.37
  13   8  -5   23.74    6.85
 -13  -8   6    0.08    1.17
  13   8  -6   -0.16    0.96
  13   8  -6  -41.78   27.71
  13   8  -6    1.06    4.72
 -13  -7   1    0.95    0.61
 -13  -7   1    0.64    1.09
  13   7  -1    0.74    1.02
  13   7  -1    1.95    1.08
 -13  -7   2   11.29    1.38
 -13  -7   2    9.73    1.59
  13   7  -2    9.35    1.53
  13   7  -2    7.95    1.76
  13   7  -2    6.24   10.09
  13   7  -2    5.26    5.75
 -13  -7   3   25.84    5.11
 -13  -7   3   29.47    4.85
  13   7  -3   35.75    2.79
  13   7  -3   44.35   22.60
  13   7  -3   28.41    7.52
 -13  -7   4   69.10    4.31
 -13  -7   4   59.63    3.98
 -13  -7   4   54.94    7.64
 -13  -7   4   46.19    7.09
  13   7  -4   74.12    4.52
  13   7  -4   66.82   32.38
  13   7  -4   59.41   10.13
 -13  -7   5  116.25    6.79
 -13  -7   5  122.15    6.98
 -13  -7   5  120.14   12.14
 -13  -7   5   92.86   11.00
  13   7  -5  147.98    7.83
  13   7  -5  112.61   37.49
  13   7  -5  153.83   16.11
 -13  -7   6  112.72    6.24
 -13  -7   6   92.18    5.73
 -13  -7   6   97.04   10.78
 -13  -7   6   71.93    9.48
  13   7  -6  103.64    6.00
  13   7  -6   75.22   42.57
  13   7  -6  117.13   14.00
 -13  -7   7   95.31    5.91
  13   7  -7  109.14    6.27
  13   7  -7   93.03   40.52
  13   7  -7   81.96   12.65
 -13  -6   1  195.93   10.51
  13   6  -1  189.88   10.28
 -13  -6   2  311.12   16.11
 -13  -6   2  300.04   15.69
  13   6  -2  306.12   15.85
  13   6  -2  300.99   16.28
 -13  -6   3  106.74    6.39
 -13  -6   3  110.47    6.46
 -13  -6   3  112.73   10.81
 -13  -6   3  118.43   10.83
  13   6  -3  114.34    6.60
  13   6  -3  103.52    6.81
  13   6  -3   92.47   18.07
  13   6  -3  118.64   14.07
 -13  -6   4   62.28    4.15
 -13  -6   4   61.48    4.18
 -13  -6   4   60.37    7.75
 -13  -6   4   62.97    7.63
  13   6  -4   72.36    4.52
  13   6  -4   89.69   29.97
  13   6  -4   66.95   11.85
 -13  -6   5   60.81    3.98
 -13  -6   5   57.30    3.95
 -13  -6   5   59.52    7.65
 -13  -6   5   48.22    7.18
  13   6  -5   66.45    4.24
  13   6  -5   49.69   33.67
 -13  -6   6   17.61    1.75
 -13  -6   6   15.25    2.03
 -13  -6   6   23.37    4.62
 -13  -6   6   13.40    3.82
  13   6  -6   17.33    2.03
  13   6  -6   16.51   39.52
  13   6  -6   23.26   10.40
 -13  -6   7   -1.28    1.29
  13   6  -7    1.78    1.11
  13   6  -7  -13.08   36.44
  13   6  -7    3.67    7.84
 -13  -6   8   -0.13    1.37
  13   6  -8    0.74    1.05
 -13  -5   1   69.61    4.36
 -13  -5   1   60.07    4.11
  13   5  -1   76.49    4.56
  13   5  -1   55.89    4.35
 -13  -5   2   16.58    1.94
  13   5  -2   21.65    2.05
 -13  -5   3    0.17    0.51
 -13  -5   3    0.52    1.16
  13   5  -3   -0.88    0.90
  13   5  -3    0.38    1.13
 -13  -5   4   57.00    3.71
 -13  -5   4   55.77    3.74
 -13  -5   4   34.02    6.16
  13   5  -4   58.69    3.83
  13   5  -4   57.01    4.24
  13   5  -4   44.11   21.76
  13   5  -4   47.69   12.56
 -13  -5   5   57.54    3.94
 -13  -5   5   58.97    4.06
 -13  -5   5   55.37    7.45
  13   5  -5   70.38    4.41
  13   5  -5   61.08   13.25
 -13  -5   6    9.10    1.25
 -13  -5   6    8.78    1.69
 -13  -5   6    3.72    2.90
 -13  -5   6    8.15    3.02
  13   5  -6    8.92    1.55
  13   5  -6  -15.31   36.56
  13   5  -6    5.68   10.97
 -13  -5   7   26.08    2.16
 -13  -5   7   18.83    2.50
 -13  -5   7   17.57    4.57
 -13  -5   7   18.42    4.49
  13   5  -7   24.55    2.35
  13   5  -7   40.62   41.52
  13   5  -7   28.28   12.13
 -13  -5   8   81.45    5.45
  13   5  -8  106.54    6.09
  13   5  -8   74.35   34.58
  13   5  -9   48.41    3.53
 -13  -4   1   45.49    3.23
 -13  -4   1   49.14    3.39
  13   4  -1   42.29    3.17
  13   4  -1   47.08    3.66
 -13  -4   2  103.12    6.13
 -13  -4   2  105.58    6.19
  13   4  -2  106.82    6.27
  13   4  -2  103.88    6.58
 -13  -4   3  190.01   10.29
 -13  -4   4  165.09    9.36
 -13  -4   4  164.19    9.29
  13   4  -4  208.75   10.63
  13   4  -4  180.89   10.33
 -13  -4   5  132.21    7.50
 -13  -4   5  119.77    7.20
  13   4  -5  145.41    7.93
  13   4  -5  127.14    7.90
  13   4  -5  104.72   30.95
  13   4  -5  140.39   18.97
 -13  -4   6   31.63    2.51
 -13  -4   6   28.24    2.65
 -13  -4   6   26.19    5.03
 -13  -4   6   31.52    5.27
  13   4  -6   29.55    2.56
  13   4  -6   51.43   35.01
  13   4  -6   42.39   13.84
 -13  -4   7   11.82    1.41
 -13  -4   7    9.06    1.65
 -13  -4   7    9.98    3.34
 -13  -4   7   10.59    3.59
  13   4  -7   12.06    1.68
  13   4  -7   24.65   31.87
  13   4  -7    9.17   13.44
 -13  -4   8   73.12    4.66
 -13  -4   8   74.69    4.92
  13   4  -8   43.94   34.74
  13   4  -8   87.97   17.13
 -13  -4   9   77.16    5.25
  13   4  -9   88.53    5.38
 -13  -3   1  119.53    6.78
 -13  -3   1  105.15    6.32
  13   3  -1  135.88    7.38
  13   3  -1  108.53    6.94
 -13  -3   2  145.37    8.15
 -13  -3   2  146.91    8.16
 -13  -3   3   38.02    2.82
 -13  -3   3   36.11    2.92
  13   3  -3   33.11    3.13
 -13  -3   4    3.97    1.40
  13   3  -4    5.23    1.28
 -13  -3   5    2.32    0.80
 -13  -3   5    2.48    1.34
 -13  -3   5    3.01    1.76
 -13  -3   5    4.32    1.85
  13   3  -5    3.33    1.20
  13   3  -5    1.33    1.12
  13   3  -5   20.86   19.04
  13   3  -5    6.10   12.37
 -13  -3   6    0.86    0.58
 -13  -3   6    0.39    1.52
 -13  -3   6    0.23    2.20
  13   3  -6    1.01    1.10
  13   3  -6    0.83    1.10
  13   3  -6   25.72   27.05
  13   3  -6  -18.69   14.09
 -13  -3   7    9.20    1.73
 -13  -3   7    8.48    3.08
  13   3  -7   13.91    1.75
  13   3  -7   -7.49   28.16
  13   3  -7   -1.31   13.58
 -13  -3   8   32.40    2.54
 -13  -3   8   30.98    2.85
 -13  -3   8   20.14    4.98
 -13  -3   8   27.54    5.74
  13   3  -8   32.88    2.81
  13   3  -8   80.72   31.12
  13   3  -8   46.10   17.39
 -13  -3   9   41.55    3.12
 -13  -3   9   44.39    3.53
  13   3  -9   19.43   19.99
 -13  -3  10  111.47    6.89
  13   3 -10  116.20    6.80
 -13  -2   1   10.22    1.70
  13   2  -1    7.16    1.32
 -13  -2   2   13.85    1.53
 -13  -2   2   14.61    1.85
  13   2  -2   15.28    1.77
  13   2  -2   13.63    1.97
 -13  -2   3   58.53    3.94
 -13  -2   3   58.76    4.05
  13   2  -3   67.29    4.25
  13   2  -3   64.59    4.56
 -13  -2   4   46.68    3.34
 -13  -2   4   50.99    3.64
  13   2  -4   51.41    3.61
  13   2  -4   50.77    3.95
 -13  -2   5  134.31    7.88
  13   2  -5  149.05    8.19
 -13  -2   6  150.05    8.24
 -13  -2   6  136.77    7.91
 -13  -2   6  124.45   12.49
 -13  -2   6  151.14   13.37
  13   2  -6  141.44    7.91
  13   2  -6  150.16    8.81
  13   2  -6  123.10   31.39
  13   2  -6  176.17   24.78
 -13  -2   7   92.23    5.52
 -13  -2   7   90.52    5.75
 -13  -2   7   78.86    9.23
 -13  -2   7   92.16   10.08
  13   2  -7   98.79    6.49
  13   2  -7   73.55   28.33
  13   2  -7  100.58   22.40
 -13  -2   8  109.22    6.50
 -13  -2   8  104.02    6.54
 -13  -2   8  105.28   10.98
 -13  -2   8  122.67   12.13
  13   2  -8  122.96    6.95
  13   2  -8  113.09   28.83
  13   2  -8  126.17   24.72
 -13  -2   9   70.53    4.62
 -13  -2   9   70.16    4.92
  13   2  -9   87.76    5.23
  13   2  -9   54.57   17.08
  13   2  -9   44.91   17.60
  13   2 -10   14.69    1.86
 -13  -1   1  106.31    6.16
 -13  -1   1  102.13    6.15
  13   1  -1  115.55    6.86
 -13  -1   2  264.81   13.90
 -13  -1   2  251.01   13.42
  13   1  -2  272.74   13.99
  13   1  -2  254.37   13.90
 -13  -1   3  167.03    9.11
 -13  -1   3  161.33    9.01
  13   1  -3  174.07    9.29
  13   1  -3  152.54    9.14
 -13  -1   4   75.73    4.62
 -13  -1   4   61.73    4.36
  13   1  -4   80.14    4.82
  13   1  -4   67.42    4.88
 -13  -1   5   41.64    2.96
 -13  -1   5   35.55    3.13
  13   1  -5   38.99    3.02
  13   1  -5   35.34    3.29
 -13  -1   6   34.90    2.68
 -13  -1   6   35.03    2.98
 -13  -1   6   29.54    4.95
  13   1  -6   37.70    2.93
  13   1  -6   35.14    3.22
  13   1  -6   41.04   19.83
  13   1  -6    5.54   19.68
 -13  -1   7   -0.32    0.48
 -13  -1   7    0.54    1.28
 -13  -1   7    0.89    2.26
  13   1  -7    0.89    1.13
  13   1  -7   -0.11    1.21
  13   1  -7   -2.62   16.21
  13   1  -7  -19.75   20.84
 -13  -1   8    2.36    0.80
 -13  -1   8    2.73    1.48
 -13  -1   8    1.62    1.58
 -13  -1   8    1.37    2.91
  13   1  -8    1.33    1.16
  13   1  -8    6.86   17.11
  13   1  -8   -8.50   19.35
 -13  -1   9    0.11    0.56
 -13  -1   9    2.12    1.33
  13   1  -9    0.56    1.02
  13   1  -9   -3.96   18.35
 -13  -1  10    0.89    0.74
 -13  -1  10    2.32    1.54
  13   1 -10   -0.35    1.00
 -13  -1  11   15.76    2.29
  13   1 -11   16.66    2.02
  13   0  -1  106.33    6.08
  13   0  -1  116.38    6.87
 -13   0   2   19.09    1.73
  13   0  -2   16.84    2.06
 -13   0   3    1.43    0.70
 -13   0   3    1.47    1.29
  13   0  -3    1.43    1.00
  13   0  -3   -0.70    1.01
 -13   0   4   18.82    1.79
 -13   0   4   19.68    2.26
  13   0  -4   19.93    2.03
  13   0  -4   17.50    2.30
 -13   0   5   98.60    6.01
 -13   0   5  102.68    6.32
  13   0  -5  117.07    6.57
  13   0  -5  116.21    7.07
 -13   0   6   76.23    4.84
 -13   0   6   76.01    5.09
  13   0  -6   88.95    5.28
  13   0  -6   81.11    5.56
  13   0  -6   65.60   17.51
  13   0  -6  132.62   26.17
 -13   0   7   21.66    2.01
 -13   0   7   20.24    2.36
 -13   0   7   14.67    3.78
 -13   0   7   26.76    4.68
  13   0  -7   24.43    2.24
  13   0  -7   24.57    2.79
  13   0  -7   13.57   12.53
  13   0  -7   19.53   23.09
 -13   0   8   76.17    4.76
 -13   0   8   58.72    7.91
  13   0  -8   82.09    5.05
  13   0  -8   89.71    5.82
  13   0  -8   70.14   17.44
  13   0  -8   63.29   25.79
 -13   0   9  181.88   10.21
  13   0  -9  186.46   10.19
  13   0  -9  176.06   23.42
  13   0  -9  206.64   31.55
 -13   0  10   37.64    2.97
 -13   0  10   38.81    3.34
  13   0 -10   46.71    3.35
 -13   0  11   89.99    5.97
  13   0 -11  106.87    6.27
 -13   1   1   78.19    4.94
 -13   1   1   85.44    6.39
  13  -1  -1   91.24    5.16
  13  -1  -1   95.11    5.78
 -13   1   2  197.16   10.78
 -13   1   2  202.08   11.00
  13  -1  -2  219.34   11.37
  13  -1  -2  236.24   12.38
 -13   1   3  154.32    8.55
  13  -1  -3  164.82    9.35
 -13   1   4  139.79    8.13
  13  -1  -4  167.73    8.80
  13  -1  -4  144.07    8.70
 -13   1   5  107.96    6.44
 -13   1   5  109.56    6.66
  13  -1  -5  132.18    7.15
  13  -1  -5  117.17    7.23
 -13   1   6   31.94    2.55
  13  -1  -6   36.15    3.24
  13  -1  -6   17.03   11.75
  13  -1  -6   20.84   23.13
 -13   1   7   13.59    2.07
 -13   1   7   14.58    3.40
 -13   1   7   19.84    4.13
  13  -1  -7   21.72    2.09
  13  -1  -7   18.02    9.70
  13  -1  -7    0.04   30.45
 -13   1   8   55.25    3.86
 -13   1   8   57.48    4.20
 -13   1   8   55.52    7.04
 -13   1   8   70.90    8.50
  13  -1  -8   64.78    4.25
  13  -1  -8   60.35    4.65
  13  -1  -8   59.36   14.08
 -13   1   9   71.71    4.68
 -13   1   9   68.12    4.90
  13  -1  -9   83.98    5.12
  13  -1  -9   81.57    6.21
  13  -1  -9   76.32   13.69
  13  -1  -9   43.42   25.49
 -13   1  10   11.75    1.53
 -13   1  10    8.01    1.81
  13  -1 -10   12.42    1.71
 -13   1  11    2.81    0.89
 -13   1  11    2.94    1.49
  13  -1 -11    2.04    1.09
 -13   1  12   11.51    2.10
  13  -1 -12   16.73    2.06
 -13   2   1   33.71    3.95
  13  -2  -1   60.04    3.75
 -13   2   2   29.43    2.54
  13  -2  -2   38.94    2.60
  13  -2  -3   40.41    2.79
  13  -2  -3   31.75    2.95
 -13   2   4    4.90    0.95
  13  -2  -4    2.85    1.38
 -13   2   5    5.87    1.58
  13  -2  -5    6.21    1.25
 -13   2   6   -0.15    0.53
 -13   2   6    0.95    1.21
  13  -2  -6    0.24    0.97
  13  -2  -6    2.26    1.30
  13  -2  -6    5.08    6.82
  13  -2  -6  -32.55   22.45
 -13   2   7    2.44    0.77
 -13   2   7    1.79    1.41
 -13   2   7    0.66    1.24
 -13   2   7    2.31    2.21
  13  -2  -7    1.91    1.11
  13  -2  -7    3.76    1.54
  13  -2  -7    4.54    5.62
  13  -2  -7   18.42   31.42
 -13   2   8   44.91    3.22
 -13   2   8   37.12    3.35
  13  -2  -8   41.71    3.25
  13  -2  -8   49.53    4.02
  13  -2  -8   43.86    9.41
 -13   2   9   22.88    2.12
 -13   2   9   19.52    2.51
  13  -2  -9   25.75    2.45
  13  -2  -9   26.05    3.00
  13  -2  -9   13.21    6.99
  13  -2  -9   28.48   23.75
 -13   2  10   65.87    4.66
  13  -2 -10   60.61    4.27
 -13   2  11  114.55    6.79
 -13   2  11  115.00    7.30
  13  -2 -11  114.20    6.85
 -13   2  12  142.88    8.89
  13  -2 -12  188.84   10.12
 -13   3   1    0.41    0.81
  13  -3  -1    1.22    0.50
  13  -3  -1    1.28    0.59
 -13   3   3   65.46    4.26
 -13   3   4   45.34    2.99
 -13   3   4   42.55    3.30
  13  -3  -4   41.89    2.95
  13  -3  -4   31.95    3.11
 -13   3   5   60.48    3.95
 -13   3   5   61.86    4.41
  13  -3  -5   67.13    4.24
  13  -3  -5   69.49    4.84
 -13   3   6  100.62    5.84
 -13   3   6  105.89    6.45
 -13   3   6   83.50    9.31
  13  -3  -6  110.57    6.22
  13  -3  -6  105.43    6.62
  13  -3  -6   96.47   11.03
  13  -3  -6  176.00   35.59
 -13   3   7  109.46    6.58
 -13   3   7  114.94    7.15
 -13   3   7  123.21   11.31
 -13   3   7  129.98   11.95
  13  -3  -7  129.05    7.26
  13  -3  -7  120.62    7.58
  13  -3  -7  109.50   12.53
  13  -3  -7  156.37   44.47
 -13   3   8  103.73    6.22
 -13   3   8  106.53    6.71
  13  -3  -8  114.18    6.59
  13  -3  -8  109.37    7.09
  13  -3  -8   92.47   11.67
 -13   3   9  109.51    6.59
 -13   3   9  106.83    6.94
  13  -3  -9  130.74    7.29
  13  -3  -9  113.50    7.39
 -13   3  10   31.84    2.64
 -13   3  10   30.23    3.18
  13  -3 -10   34.65    2.97
  13  -3 -10   30.70    3.68
 -13   3  11    5.16    1.15
 -13   3  11    4.67    1.84
 -13   3  12   -0.45    0.70
 -13   3  12    1.51    1.42
  13  -3 -12    0.77    1.24
 -13   4   4   66.43    4.68
  13  -4  -4   78.75    4.64
  13  -4  -4   76.49    5.02
 -13   4   5   22.91    1.88
 -13   4   5   16.59    2.24
  13  -4  -5   24.45    2.09
  13  -4  -5   16.58    2.31
 -13   4   6   35.02    2.65
 -13   4   6   32.02    3.23
 -13   4   6   41.98    5.39
  13  -4  -6   36.60    2.87
  13  -4  -6   37.33    3.47
  13  -4  -6   34.84    5.74
  13  -4  -6   54.81   30.53
 -13   4   7   27.64    2.24
 -13   4   7   21.94    2.69
  13  -4  -7   25.71    2.33
  13  -4  -7   21.03    2.73
  13  -4  -7  113.52   45.97
 -13   4   8    1.07    0.70
  13  -4  -8    2.10    1.55
  13  -4  -8   -0.16    2.79
  13  -4  -8   12.84   30.48
 -13   4   9    1.86    0.81
 -13   4   9    1.28    1.55
  13  -4  -9    0.57    1.11
  13  -4  -9    2.88    1.76
 -13   4  10   22.55    2.15
 -13   4  10   18.51    2.88
  13  -4 -10   20.98    2.44
  13  -4 -10   27.99    3.15
 -13   4  11   56.56    3.99
 -13   4  11   51.64    4.58
  13  -4 -11   62.09    4.32
 -13   4  12   41.53    3.28
 -13   5   4    5.11    1.55
  13  -5  -4    4.94    1.03
  13  -5  -4    2.03    1.13
 -13   5   5  130.80    7.84
 -13   5   5  125.09   11.67
  13  -5  -5  124.84   11.75
  13  -5  -5  181.82   22.91
 -13   5   6  117.31    6.72
 -13   5   6  126.75    7.68
  13  -5  -6  127.18    7.17
  13  -5  -6  103.33    7.02
  13  -5  -6  129.90   11.68
  13  -5  -6  169.54   34.81
  13  -5  -7   26.48    2.47
  13  -5  -7   20.80    2.85
  13  -5  -7   31.79    4.87
  13  -5  -7   61.55   45.81
 -13   5   8   61.44    3.95
 -13   5   8   51.42    4.39
  13  -5  -8   57.49    4.03
  13  -5  -8   49.21    4.35
 -13   5   9  134.91    7.92
 -13   5   9  139.59    8.92
  13  -5  -9  149.64    8.55
  13  -5  -9  157.45    9.47
 -13   5  10   82.81    5.31
 -13   5  10   81.65    6.19
  13  -5 -10   88.75    5.81
  13  -5 -10   89.44    6.66
  13  -6  -3  118.17   11.46
  13  -6  -3  162.56   14.09
  13  -6  -4  124.29   11.66
  13  -6  -4  165.64   18.30
 -13   6   5   67.54    4.26
 -13   6   5   81.06    5.47
  13  -6  -5  107.28    9.11
  13  -6  -5  129.94   23.74
 -13   6   6  104.57    6.02
 -13   6   6   96.35    6.73
  13  -6  -6  121.06   10.78
  13  -6  -6  119.81   40.01
 -13   6   7   10.68    1.35
 -13   6   8    9.58    1.41
 -13   6   8    6.40    2.20
 -12 -15   1    9.49    4.64
 -12 -15   1    3.27    2.22
  12  15  -1  -13.42   25.90
  12  15  -1    2.49    1.75
 -12 -15   2    7.06    4.87
  12  15  -2   -9.84   10.31
  12  15  -2    5.98    2.33
 -12 -14   1   31.06    2.67
 -12 -14   1   35.76    6.89
 -12 -14   1   28.55    5.09
  12  14  -1   34.06    2.65
  12  14  -1   -4.58   30.97
  12  14  -1   27.11    4.87
 -12 -14   2   14.39    5.01
 -12 -14   2    6.36    2.67
  12  14  -2   14.50   31.24
  12  14  -2    7.88    2.56
 -12 -14   3  140.01   12.95
  12  14  -3  141.36   13.05
 -12 -13   1   43.00    3.19
 -12 -13   1   45.57    7.61
 -12 -13   1   39.14    5.81
  12  13  -1   41.87    3.09
  12  13  -1   32.47   33.98
  12  13  -1   43.17    5.88
 -12 -13   2    0.06    0.96
 -12 -13   2   -0.68    3.39
 -12 -13   2    1.67    1.31
  12  13  -2   -0.98    0.80
  12  13  -2    9.71   29.69
  12  13  -2    0.45    1.11
 -12 -13   3    3.01    4.09
 -12 -13   3    6.03    2.40
  12  13  -3   26.14   32.33
  12  13  -3    8.21    2.51
 -12 -13   4   -2.30    4.03
 -12 -13   4    3.02    1.87
  12  13  -4  -15.90   18.05
  12  13  -4    4.43    2.00
  12  13  -5    6.82    9.35
 -12 -12   1   27.10    6.28
  12  12  -1   33.09    2.65
  12  12  -1   24.29   33.92
 -12 -12   2  124.80    6.86
 -12 -12   2  108.65    6.42
 -12 -12   2  103.79   12.01
 -12 -12   2   96.33   10.37
  12  12  -2  113.39    6.46
  12  12  -2  123.25   43.37
  12  12  -2  110.65   10.81
 -12 -12   3  104.63    6.29
 -12 -12   3  101.85   10.50
  12  12  -3  118.82    6.68
  12  12  -3  112.37   10.93
 -12 -12   4  118.89   12.79
  12  12  -4   58.52   36.98
 -12 -12   5   52.92    8.39
 -12 -12   5   49.77    6.51
  12  12  -6    7.85   11.95
  12  12  -6    5.68    2.68
 -12 -11   1  152.78    8.64
 -12 -11   1  153.72    8.63
 -12 -11   1  156.34   13.78
  12  11  -1  172.89    9.11
  12  11  -1  150.96   13.77
 -12 -11   2   57.74    3.86
 -12 -11   2   59.02    3.97
 -12 -11   2   65.13    8.49
 -12 -11   2   51.47    6.87
  12  11  -2   68.03    4.17
  12  11  -2   73.49   36.45
  12  11  -2   55.05    7.10
 -12 -11   3    7.31    1.11
 -12 -11   3    6.34    1.37
 -12 -11   3    6.95    3.82
 -12 -11   3    6.07    2.22
  12  11  -3    6.39    1.23
  12  11  -3    7.10   34.54
  12  11  -3    5.42    2.38
 -12 -11   4    1.12    1.19
 -12 -11   4    1.99    3.09
 -12 -11   4   -0.72    1.01
  12  11  -4    0.81    0.85
  12  11  -4    0.68    1.53
 -12 -11   5    9.23    4.31
  12  11  -5   10.86    1.67
  12  11  -5   -9.81   29.34
 -12 -11   6   25.35    5.87
 -12 -11   6   28.96    4.59
  12  11  -6    1.56   18.88
  12  11  -6   23.92    4.79
  12  11  -7    3.93   11.32
  12  11  -7    2.04    2.04
 -12 -10   1   55.54    3.76
 -12 -10   1   55.78    3.81
 -12 -10   1   55.78    7.61
 -12 -10   1   50.00    6.64
  12  10  -1   66.12    4.03
  12  10  -1   41.29   26.02
  12  10  -1   57.63    6.95
 -12 -10   2   15.45    1.65
 -12 -10   2   12.51    1.67
 -12 -10   2   15.15    4.17
 -12 -10   2   12.41    3.10
  12  10  -2   17.39    1.73
  12  10  -2   20.53   27.94
  12  10  -2   13.54    3.31
 -12 -10   3  105.91    6.09
 -12 -10   3  102.88    6.00
 -12 -10   3   99.65   10.98
 -12 -10   3   86.48    9.59
  12  10  -3   98.65    5.86
  12  10  -3  125.81   42.14
  12  10  -3  100.26   10.21
 -12 -10   4  110.13    6.43
 -12 -10   4  107.45    6.42
 -12 -10   4  120.82   12.15
 -12 -10   4  101.54   10.50
  12  10  -4  118.80    6.74
  12  10  -4   74.09   35.78
  12  10  -4  110.16   11.11
 -12 -10   5   45.28    3.39
 -12 -10   5   44.51    7.39
 -12 -10   5   41.90    5.93
  12  10  -5   46.07    3.33
  12  10  -5   45.97   40.56
  12  10  -5   46.29    6.48
 -12 -10   6   13.23    1.94
 -12 -10   6   18.18    5.24
  12  10  -6   21.35    2.05
  12  10  -6  -20.14   31.73
  12  10  -8    7.86    8.11
 -12  -9   1  209.46   11.01
 -12  -9   1  212.25   11.05
 -12  -9   1  200.62   16.99
 -12  -9   1  160.58   15.42
  12   9  -1  218.69   11.14
  12   9  -1  202.76   11.22
  12   9  -1  206.99   31.96
  12   9  -1  188.28   16.27
 -12  -9   2   25.70    2.13
 -12  -9   2   20.20    1.98
 -12  -9   2   17.82    4.39
 -12  -9   2   17.11    3.64
  12   9  -2   23.72    2.06
  12   9  -2   13.39    2.30
  12   9  -2   30.14   28.16
  12   9  -2   18.61    3.93
 -12  -9   3   49.44    3.43
 -12  -9   3   50.76    7.12
 -12  -9   3   41.74    6.03
  12   9  -3   54.13    3.57
  12   9  -3   65.90   29.70
  12   9  -3   47.07    6.48
 -12  -9   4  142.79    7.88
 -12  -9   4  131.56    7.54
 -12  -9   4  150.62   13.76
 -12  -9   4  114.42   11.84
  12   9  -4  138.72    7.75
  12   9  -4  163.93   41.58
  12   9  -4  139.73   12.99
 -12  -9   5   21.14    1.92
 -12  -9   5   22.06    2.30
 -12  -9   5   25.63    5.44
 -12  -9   5   18.04    3.84
  12   9  -5  -14.47   33.68
  12   9  -5   20.16    4.51
 -12  -9   6    4.75    1.40
 -12  -9   6    4.46    3.85
 -12  -9   6    4.70    2.04
  12   9  -6    4.30    1.18
  12   9  -6   -6.51   37.69
  12   9  -6    2.39    3.12
 -12  -9   7   -0.62    1.15
 -12  -9   7    4.26    2.79
  12   9  -7    0.12    0.93
  12   9  -7   -1.18   33.51
 -12  -9   8    1.28    3.18
 -12  -9   8    6.92    2.32
  12   9  -8    9.03   16.85
  12   9  -8    5.87    3.35
 -12  -8   1    0.62    0.52
 -12  -8   1   -0.66    0.93
 -12  -8   1    0.21    1.60
 -12  -8   1   -0.29    0.84
  12   8  -1    0.24    0.75
  12   8  -1    0.37    0.91
  12   8  -1    7.03   15.22
  12   8  -1    0.41    1.52
 -12  -8   2    2.92    0.77
 -12  -8   2    2.88    1.04
 -12  -8   2    3.39    2.26
 -12  -8   2    1.23    1.44
  12   8  -2    2.10    1.06
  12   8  -2    2.98    1.16
  12   8  -2    5.02   21.95
  12   8  -2    0.69    2.14
 -12  -8   3    0.50    0.50
 -12  -8   3    0.26    1.11
 -12  -8   3    1.23    2.06
 -12  -8   3    0.28    1.09
  12   8  -3    1.92    0.95
  12   8  -3    0.83    1.02
  12   8  -3   21.96   27.14
  12   8  -3   -0.48    2.06
 -12  -8   4   50.85    3.55
 -12  -8   4   46.96    7.12
 -12  -8   4   44.47    6.30
  12   8  -4   61.66    3.90
  12   8  -4   52.33   35.42
  12   8  -4   51.93    7.13
 -12  -8   5   26.23    2.18
 -12  -8   5   22.53    2.26
 -12  -8   5   17.60    5.26
 -12  -8   5   17.98    4.00
  12   8  -5   26.23    2.34
  12   8  -5   -2.32   34.40
  12   8  -5   25.62    4.99
 -12  -8   6   78.22    4.97
 -12  -8   6   80.75    5.18
 -12  -8   6   91.81    9.96
 -12  -8   6   82.99    8.94
  12   8  -6   92.40    5.58
  12   8  -6  107.91   49.20
  12   8  -6   81.72    9.78
 -12  -8   7  176.84    9.74
 -12  -8   7  174.05   15.19
  12   8  -7  172.00    9.50
  12   8  -7  179.28   16.68
 -12  -8   8   99.14   10.53
 -12  -8   8   81.16    9.21
  12   8  -8   48.20   31.45
  12   8  -8   86.47   10.80
  12   8  -9   50.25    8.13
 -12  -7   1   43.16    3.05
 -12  -7   1   30.78    5.40
  12   7  -1   47.69    3.12
  12   7  -1   25.03   12.84
  12   7  -1   40.07    6.10
 -12  -7   2   60.23    3.94
 -12  -7   2   63.11    4.00
 -12  -7   2   47.20    7.03
 -12  -7   2   53.57    6.85
  12   7  -2   68.69    4.14
  12   7  -2   61.55    4.39
  12   7  -2   19.16   22.49
  12   7  -2   60.98    7.86
 -12  -7   3  314.84   15.93
 -12  -7   3  296.68   15.30
 -12  -7   3  299.40   23.20
 -12  -7   3  256.88   21.68
  12   7  -3  317.03   15.90
  12   7  -3  279.34   15.34
 -12  -7   4  282.95   15.24
 -12  -7   4  333.94   24.75
 -12  -7   4  267.30   22.44
  12   7  -4  335.66   17.32
  12   7  -4  402.93   51.12
  12   7  -4  316.03   24.77
 -12  -7   5  150.59    8.42
 -12  -7   5  174.65   14.78
 -12  -7   5  129.70   13.08
  12   7  -5  172.78    9.11
  12   7  -5  141.05   45.26
  12   7  -5  151.28   14.83
 -12  -7   6   46.47    3.26
 -12  -7   6   42.55    3.26
 -12  -7   6   48.97    6.94
 -12  -7   6   37.60    6.01
  12   7  -6   57.90    3.73
  12   7  -6   54.64   36.99
  12   7  -6   42.96    7.54
 -12  -7   7   35.46    2.67
 -12  -7   7   27.46    2.68
  12   7  -7   37.39    2.89
  12   7  -7   23.28   36.93
  12   7  -7   40.10    7.40
 -12  -7   8   14.42    1.98
 -12  -7   8   13.76    4.28
 -12  -7   8   12.96    3.51
  12   7  -8   18.49    1.93
  12   7  -8   13.60   31.35
  12   7  -8   14.92    5.76
 -12  -7   9    4.33    3.05
 -12  -7   9    4.13    2.17
  12   7  -9   13.45   20.54
  12   7  -9    3.44    4.92
  12   7 -10   -3.56    5.23
  12   7 -10    8.82    5.32
 -12  -6   1  109.41    6.28
 -12  -6   1   96.22    5.86
  12   6  -1  105.28    6.13
  12   6  -1  104.43    6.45
 -12  -6   2  274.88   13.93
 -12  -6   2  239.36   12.78
 -12  -6   2  231.78   19.35
  12   6  -2  245.05   12.93
  12   6  -2  225.73   12.85
  12   6  -2  288.55   29.03
  12   6  -2  282.91   21.79
 -12  -6   3   82.81    5.08
 -12  -6   3   76.28    4.87
 -12  -6   3   88.80    9.18
 -12  -6   3   83.92    8.83
  12   6  -3   81.53    5.00
  12   6  -3   77.62    5.31
  12   6  -3   87.46   25.57
  12   6  -3   95.26   10.70
 -12  -6   4    2.16    0.71
 -12  -6   4    2.84    1.16
 -12  -6   4    0.76    2.18
 -12  -6   4    2.53    1.63
  12   6  -4    2.33    1.00
  12   6  -4    1.52    1.21
  12   6  -4   27.67   27.04
  12   6  -4   -0.31    3.87
 -12  -6   5   20.07    1.87
 -12  -6   5   18.98    2.15
 -12  -6   5   14.17    4.09
 -12  -6   5   20.01    3.87
  12   6  -5   20.72    2.22
  12   6  -5   22.27    2.52
  12   6  -5  -24.12   28.29
  12   6  -5   20.71    6.18
 -12  -6   6   45.27    3.36
 -12  -6   6   43.96    3.27
 -12  -6   6   38.60    5.95
  12   6  -6   47.66    3.39
  12   6  -6   45.76    8.20
 -12  -6   7   61.38    3.90
 -12  -6   7   48.49    3.60
 -12  -6   7   51.47    7.38
  12   6  -7   56.35    3.83
  12   6  -7   86.79   36.79
 -12  -6   8   17.79    1.77
 -12  -6   8   17.92    2.16
 -12  -6   8   15.42    4.15
 -12  -6   8   15.60    3.80
  12   6  -8   22.07    2.11
  12   6  -8   24.58   29.39
  12   6  -8   15.84    7.33
 -12  -6   9   56.79    3.97
 -12  -6   9   50.49    7.22
 -12  -6   9   46.65    6.85
  12   6  -9   61.38    3.98
  12   6  -9   -0.96   22.49
  12   6  -9   46.38    9.38
 -12  -6  10  139.72   13.61
 -12  -6  10  138.41   13.25
 -12  -5   1   91.79    5.34
 -12  -5   1   81.56    4.97
  12   5  -1   79.62    4.87
  12   5  -1   81.32    5.31
 -12  -5   2   47.99    3.36
  12   5  -2   50.91    3.82
 -12  -5   3   20.18    1.83
 -12  -5   3   17.89    1.93
 -12  -5   3   11.09    3.46
 -12  -5   3   15.85    3.52
  12   5  -3   20.74    1.93
  12   5  -3   17.13    2.08
  12   5  -3   19.74   17.53
  12   5  -3   13.04    5.92
 -12  -5   4  142.35    7.89
 -12  -5   4  138.00    7.72
 -12  -5   4  131.31   12.64
 -12  -5   4  132.43   12.54
  12   5  -4  147.44    8.00
  12   5  -4  131.58    7.99
  12   5  -4  101.46   34.40
  12   5  -4  142.31   15.03
 -12  -5   5  195.24   10.31
 -12  -5   5  167.99    9.50
 -12  -5   5  177.38   15.70
 -12  -5   5  176.34   15.64
  12   5  -5  189.27   10.11
  12   5  -5  186.63   10.48
  12   5  -5  194.74   38.36
 -12  -5   6  146.32    8.05
 -12  -5   6  126.61    7.49
 -12  -5   6  140.37   13.10
 -12  -5   6  123.25   12.52
  12   5  -6  153.55    8.28
  12   5  -6  137.15    8.35
  12   5  -6  153.70   37.22
  12   5  -6  159.02   16.32
 -12  -5   7   82.34    5.12
 -12  -5   7   82.58    5.21
 -12  -5   7   86.62    9.45
 -12  -5   7   77.33    9.05
  12   5  -7   88.39    5.32
  12   5  -7   82.99   28.61
  12   5  -7   85.85   12.53
 -12  -5   8   42.05    3.04
 -12  -5   8   40.60    3.23
 -12  -5   8   40.87    6.20
 -12  -5   8   32.48    5.86
  12   5  -8   48.79    3.39
  12   5  -8   65.55   29.22
  12   5  -8   59.09   11.31
 -12  -5   9   36.98    3.09
 -12  -5   9   31.94    5.52
 -12  -5   9   25.72    5.28
  12   5  -9   37.37    2.88
  12   5  -9   41.31   31.98
  12   5  -9   29.60    9.40
 -12  -5  10   69.11    4.81
 -12  -5  10   84.33    9.30
  12   5 -10   91.04    5.38
  12   5 -10   52.19   20.97
  12   5 -10   60.54   12.33
  12   5 -11   56.57   11.70
 -12  -4   1  299.66   15.37
 -12  -4   1  275.77   14.55
  12   4  -1  309.34   15.49
  12   4  -1  274.21   14.92
 -12  -4   2  194.80   10.39
 -12  -4   2  176.87    9.75
  12   4  -2  197.88   10.38
  12   4  -2  181.46   10.30
 -12  -4   3  122.98    6.94
  12   4  -3  110.85    6.94
  12   4  -3  122.02   13.14
 -12  -4   4   83.58    5.15
 -12  -4   4   78.15    5.01
 -12  -4   4   86.23    9.12
 -12  -4   4   84.04    9.04
  12   4  -4   98.25    5.59
  12   4  -4   82.39    5.49
  12   4  -4   88.72   25.97
  12   4  -4   98.28   12.31
 -12  -4   5   51.96    3.64
 -12  -4   5   58.59    3.91
 -12  -4   5   66.85    7.37
 -12  -4   5   60.19    7.29
  12   4  -5   53.65    3.69
  12   4  -5   52.84    4.10
  12   4  -5   46.41   25.42
  12   4  -5   67.79   11.22
 -12  -4   6   26.07    2.24
 -12  -4   6   25.48    2.42
 -12  -4   6   34.58    4.95
 -12  -4   6   27.06    4.87
  12   4  -6   28.72    2.48
  12   4  -6   25.98    2.69
  12   4  -6   42.00   23.08
  12   4  -6   17.73    9.29
 -12  -4   7   -0.88    0.47
 -12  -4   7    0.08    1.16
 -12  -4   7   -0.38    1.42
 -12  -4   7   -0.76    1.31
  12   4  -7    0.24    0.85
  12   4  -7   -1.79   22.28
  12   4  -7    3.48    7.59
 -12  -4   8    0.84    0.64
 -12  -4   8    0.84    1.06
 -12  -4   8   -1.19    1.67
 -12  -4   8    2.41    1.69
  12   4  -8    0.45    0.93
  12   4  -8    7.48   20.21
  12   4  -8    2.38    8.43
 -12  -4   9    6.32    1.05
 -12  -4   9    4.87    2.48
 -12  -4   9    5.81    2.68
  12   4  -9   31.01   21.23
  12   4  -9   17.03    9.78
 -12  -4  10   66.52    4.33
 -12  -4  10   45.08    6.87
 -12  -4  10   47.84    7.13
  12   4 -10   56.85    3.86
  12   4 -10   47.02   15.50
  12   4 -10   59.42   11.99
  12   4 -11   29.75   10.19
  12   4 -11   30.25    8.92
 -12  -3   1    1.61    1.07
  12   3  -1    2.22    0.94
 -12  -3   2    4.60    0.88
 -12  -3   2    3.72    1.23
  12   3  -2    6.49    1.19
  12   3  -2    4.21    1.25
 -12  -3   3    7.48    1.12
 -12  -3   3    9.03    1.46
  12   3  -3    9.52    1.41
  12   3  -3   10.82    1.70
 -12  -3   4   41.00    2.92
 -12  -3   4   34.04    5.35
  12   3  -4   44.94    3.45
  12   3  -4   32.12   19.37
 -12  -3   5   75.68    4.66
 -12  -3   5   78.12    4.81
 -12  -3   5   63.41    8.00
 -12  -3   5   74.04    8.33
  12   3  -5   79.44    4.78
  12   3  -5   69.24    4.88
  12   3  -5   95.25   24.25
  12   3  -5   71.34   12.91
 -12  -3   6   65.39    4.26
 -12  -3   6   72.27    4.58
 -12  -3   6   64.07    7.80
 -12  -3   6   64.60    8.08
  12   3  -6   74.11    4.53
  12   3  -6   64.19    4.65
  12   3  -6   88.41   23.52
  12   3  -6   72.69   13.13
 -12  -3   7  145.97    8.43
 -12  -3   7  148.90    8.59
 -12  -3   7  158.35   14.19
 -12  -3   7  168.25   14.73
  12   3  -7  156.15    8.70
  12   3  -7  164.01    9.42
  12   3  -7  191.66   28.59
  12   3  -7  200.64   21.25
 -12  -3   8  207.50   11.52
 -12  -3   8  197.79   11.22
 -12  -3   8  234.39   19.10
  12   3  -8  257.65   12.97
  12   3  -8  250.31   32.61
  12   3  -8  279.73   26.11
 -12  -3   9  103.90    6.28
 -12  -3   9  111.55    6.62
 -12  -3   9  102.70   10.87
 -12  -3   9   98.61   10.99
  12   3  -9  135.77    7.27
  12   3  -9  120.37   23.78
  12   3  -9  123.44   19.61
 -12  -3  10   81.24    5.07
 -12  -3  10   82.74    5.35
 -12  -3  10   78.46    9.10
 -12  -3  10   75.96    9.29
  12   3 -10   94.62    5.56
  12   3 -10   95.41   23.68
  12   3 -10   77.77   16.59
 -12  -3  11   76.25    5.07
 -12  -3  11   75.25    8.88
  12   3 -11   90.02    5.31
  12   3 -11   49.85   14.03
  12   3 -11   50.09   15.20
  12   3 -12   10.86    9.39
 -12  -2   1   46.85    3.18
 -12  -2   1   45.42    3.14
  12   2  -1   45.60    3.11
  12   2  -1   46.87    3.44
 -12  -2   2   91.44    5.42
  12   2  -2   95.14    5.50
  12   2  -2   86.72    5.75
 -12  -2   3  145.85    8.08
 -12  -2   3  142.46    7.96
  12   2  -3  142.63    7.95
  12   2  -3  150.09    8.57
 -12  -2   4  198.49   10.86
 -12  -2   4  204.71   11.04
  12   2  -4  219.43   11.44
  12   2  -4  205.42   11.41
  12   2  -4  222.82   20.63
 -12  -2   5  233.51   12.76
 -12  -2   5  235.01   12.86
 -12  -2   5  251.72   19.92
 -12  -2   5  277.37   20.83
  12   2  -5  240.78   13.33
  12   2  -5  319.16   31.57
  12   2  -5  292.16   26.50
 -12  -2   6   69.74    4.63
 -12  -2   6   74.47    8.24
 -12  -2   6   77.60    8.70
  12   2  -6   74.76    4.70
  12   2  -6   61.61   17.83
  12   2  -6   85.23   15.40
 -12  -2   7    4.32    0.92
 -12  -2   7    2.44    1.29
 -12  -2   7    6.22    2.00
 -12  -2   7    2.83    2.44
  12   2  -7    5.27    1.22
  12   2  -7    2.89    1.36
  12   2  -7    4.41   11.98
  12   2  -7    0.52   10.18
 -12  -2   8   19.38    1.87
 -12  -2   8   18.84    3.87
 -12  -2   8   19.00    4.24
  12   2  -8   15.06    2.21
  12   2  -8   19.77   12.94
  12   2  -8   16.36   11.53
 -12  -2   9    1.71    0.70
 -12  -2   9    0.18    1.24
 -12  -2   9    2.23    1.63
 -12  -2   9    2.89    2.07
  12   2  -9    1.28    1.20
  12   2  -9  -10.31   10.99
  12   2  -9   14.13   13.18
 -12  -2  10    0.21    0.49
 -12  -2  10   -0.20    1.14
 -12  -2  10    0.58    1.36
 -12  -2  10    3.74    2.35
  12   2 -10    0.00    0.90
  12   2 -10   17.60   13.91
  12   2 -10    3.41   13.69
 -12  -2  11    9.26    1.81
 -12  -2  11    8.13    2.89
 -12  -2  11   11.42    3.60
  12   2 -11   10.87    1.63
  12   2 -11    7.47    8.87
  12   2 -11    3.78    9.73
  12   2 -12    3.89    5.36
  12   2 -12    4.57    7.37
 -12  -1   1   48.60    3.26
 -12  -1   1   46.55    3.26
  12   1  -1   55.41    3.48
  12   1  -1   50.14    3.59
 -12  -1   2   87.12    5.18
 -12  -1   2   85.82    5.16
  12   1  -2   90.90    5.28
  12   1  -2   83.70    5.43
 -12  -1   3   59.96    3.89
  12   1  -3   59.21    3.80
  12   1  -3   51.50    4.03
 -12  -1   4   10.14    1.26
 -12  -1   4    7.63    1.48
  12   1  -4    8.29    1.32
  12   1  -4    7.02    1.50
 -12  -1   5    1.22    0.62
 -12  -1   5    2.14    1.18
 -12  -1   5    2.52    1.28
 -12  -1   5    3.52    1.71
  12   1  -5    1.20    0.93
  12   1  -5    0.12    1.00
  12   1  -5   -1.25   10.42
  12   1  -5    0.16   11.31
 -12  -1   6   52.70    3.79
 -12  -1   6   62.53    4.15
 -12  -1   6   50.28    6.79
 -12  -1   6   64.08    7.52
  12   1  -6   62.11    4.01
  12   1  -6   61.10    4.35
  12   1  -6   70.88   15.41
 -12  -1   7  217.12   11.58
 -12  -1   7  216.07   11.62
 -12  -1   7  205.48   17.41
  12   1  -7  205.43   11.19
  12   1  -7  221.43   12.17
  12   1  -7  236.64   23.51
 -12  -1   8  133.26    7.39
 -12  -1   8  125.08    7.33
 -12  -1   8  110.21   11.41
 -12  -1   8  121.32   12.33
  12   1  -8  131.97    7.39
  12   1  -8  116.52    7.36
  12   1  -8  136.76   18.34
  12   1  -8  157.23   21.48
 -12  -1   9    3.56    0.93
 -12  -1   9    4.83    1.46
 -12  -1   9    3.52    1.96
 -12  -1   9    6.53    2.67
  12   1  -9    4.92    1.17
  12   1  -9   10.07    8.70
  12   1  -9    8.60   13.68
 -12  -1  10   36.44    2.80
 -12  -1  10   40.09    3.21
 -12  -1  10   33.36    5.46
 -12  -1  10   33.44    6.10
  12   1 -10   46.27    3.24
  12   1 -10   37.60   12.95
  12   1 -10   35.96   15.86
 -12  -1  11   98.30    6.00
 -12  -1  11  109.86    6.55
 -12  -1  11  101.80   11.32
  12   1 -11  113.94    6.51
  12   1 -11   75.43   16.40
 -12  -1  12   45.06    3.68
  12   1 -12   53.83    3.64
  12   1 -12   20.86    7.72
  12   1 -12   25.51   10.69
 -12   0   1   24.25    1.98
 -12   0   1   26.00    2.18
  12   0  -1   24.35    2.04
  12   0  -1   26.67    2.33
 -12   0   2   10.80    1.32
 -12   0   2   14.02    1.66
  12   0  -2   12.93    1.48
  12   0  -2   11.35    1.68
 -12   0   3  122.60    6.96
 -12   0   3  116.22    6.79
  12   0  -3  136.35    7.43
  12   0  -3  128.07    7.51
 -12   0   4  243.21   12.85
 -12   0   5  237.91   12.62
 -12   0   5  242.78   12.83
 -12   0   5  221.92   18.60
  12   0  -5  261.86   13.29
  12   0  -5  232.21   12.89
  12   0  -5  259.88   22.56
 -12   0   6  154.32    8.75
 -12   0   6  164.80    9.20
 -12   0   6  157.06   14.07
 -12   0   6  180.15   15.09
  12   0  -6  171.73    9.27
  12   0  -6  153.41    9.11
  12   0  -6  200.96   19.25
  12   0  -6  187.93   24.96
 -12   0   7   87.49    5.41
 -12   0   7   87.87    5.53
 -12   0   7   91.31    9.41
 -12   0   7  106.16   10.44
  12   0  -7   92.46    5.58
  12   0  -7   88.79    5.94
  12   0  -7  104.76   13.13
  12   0  -7  106.17   19.93
 -12   0   8   30.21    2.48
 -12   0   8   26.83    2.63
 -12   0   8   30.99    4.84
 -12   0   8   33.71    5.65
  12   0  -8   36.93    2.78
  12   0  -8   32.03    3.05
  12   0  -8   26.82    8.68
  12   0  -8   48.75   17.66
 -12   0   9   39.49    2.92
 -12   0   9   36.87    6.18
  12   0  -9   53.91   18.20
 -12   0  10   49.60    3.58
 -12   0  10   49.33    3.72
 -12   0  10   46.30    6.35
 -12   0  10   51.04    7.54
  12   0 -10   57.23   11.21
  12   0 -10   55.85   18.71
 -12   0  11   76.30    4.88
 -12   0  11   74.93    5.07
 -12   0  11   81.57    8.79
 -12   0  11   86.69    9.89
  12   0 -11   89.99    5.37
  12   0 -11   58.46   12.06
  12   0 -11   82.48   18.64
 -12   0  12    5.49    1.64
 -12   0  12    8.02    2.61
  12   0 -12    7.11    1.36
  12   0 -12    8.77    6.54
 -12   1   1  188.25   10.12
  12  -1  -1  200.95   10.39
 -12   1   2  225.19   11.96
 -12   1   2  224.32   12.03
  12  -1  -2  235.30   12.20
  12  -1  -2  250.64   13.03
  12  -1  -3  157.25    8.42
  12  -1  -3  146.00    8.45
 -12   1   4   28.36    2.21
 -12   1   4   25.68    2.36
  12  -1  -4   30.15    2.33
  12  -1  -4   23.16    2.45
 -12   1   5   16.66    1.71
 -12   1   5   16.93    2.02
 -12   1   5   18.60    3.47
  12  -1  -5   22.24    2.00
  12  -1  -5   16.28    5.49
 -12   1   6    6.03    1.06
 -12   1   6    4.58    1.43
 -12   1   6    7.73    2.17
 -12   1   6   10.64    2.78
  12  -1  -6    8.19    1.34
  12  -1  -6    5.94    1.51
  12  -1  -6    5.00    4.34
  12  -1  -6  -16.66   17.94
 -12   1   7    6.15    1.10
 -12   1   7    6.12    2.14
 -12   1   7    7.04    3.02
  12  -1  -7    8.92    1.74
  12  -1  -7    4.31    4.32
  12  -1  -7   -6.20   17.85
 -12   1   8    1.83    1.17
 -12   1   8    1.38    1.27
 -12   1   8    0.92    2.24
  12  -1  -8    1.40    0.95
  12  -1  -8    0.60    4.32
  12  -1  -8    7.36   16.63
 -12   1   9    1.32    0.78
 -12   1   9    2.55    1.35
 -12   1   9    2.78    1.60
 -12   1   9    1.64    2.43
  12  -1  -9    2.58    1.10
  12  -1  -9    1.90    1.19
  12  -1  -9   -2.34   15.81
 -12   1  10   39.45    2.98
 -12   1  10   32.49    5.32
  12  -1 -10   38.86    3.05
  12  -1 -10   42.61    8.40
 -12   1  11   64.15    4.26
 -12   1  11   70.04    4.74
 -12   1  11   58.68    7.37
 -12   1  11   65.54    8.63
  12  -1 -11   72.18    4.56
  12  -1 -11   45.43    9.53
  12  -1 -11   75.24   22.16
 -12   1  12  124.61    7.21
 -12   1  12  130.20    7.65
 -12   1  12  121.30   11.79
 -12   1  12  126.63   13.12
  12  -1 -12  128.52    7.39
  12  -1 -12  117.28   14.17
  12  -1 -12  100.47   20.68
 -12   1  13  118.75    7.43
  12  -1 -13  125.05    7.28
 -12   2   1    0.87    1.77
  12  -2  -1    5.20    1.01
 -12   2   2   -0.14    0.40
 -12   2   2    0.37    0.91
  12  -2  -2    0.48    0.55
  12  -2  -2    0.36    0.89
 -12   2   3    0.36    0.51
 -12   2   3    1.02    0.97
  12  -2  -3    0.66    0.66
  12  -2  -3    1.29    0.95
 -12   2   4   76.26    4.69
 -12   2   4   77.99    4.88
  12  -2  -4   85.49    4.96
  12  -2  -4   85.74    5.34
 -12   2   5  171.15    9.36
 -12   2   5  183.00    9.83
 -12   2   5  161.50   14.43
  12  -2  -5  183.54    9.72
  12  -2  -5  184.14   10.13
 -12   2   6   65.23    4.21
 -12   2   6   70.88    4.55
 -12   2   6   62.17    7.45
 -12   2   6   73.17    8.13
  12  -2  -6   73.64    4.48
  12  -2  -6   72.21    4.85
  12  -2  -6   63.29    8.31
  12  -2  -6  104.52   24.81
 -12   2   7   73.57    4.67
 -12   2   7   74.05    4.85
  12  -2  -7   74.87    4.75
  12  -2  -7   83.13    5.43
  12  -2  -7   85.41    9.64
  12  -2  -7  129.03   27.36
 -12   2   8  131.56    7.59
 -12   2   8  126.32    7.59
 -12   2   8  143.26   13.54
  12  -2  -8  139.38    7.87
  12  -2  -8  147.59    8.58
  12  -2  -8  147.83   14.07
  12  -2  -8  163.68   28.72
 -12   2   9  121.65    7.19
 -12   2   9  125.27    7.46
 -12   2   9  132.95   13.06
  12  -2  -9  132.72    7.55
  12  -2  -9  134.99    8.08
  12  -2  -9  142.49   13.82
  12  -2  -9  168.76   29.91
 -12   2  10   92.38    5.73
  12  -2 -10  109.82    6.83
  12  -2 -10  102.61   11.74
 -12   2  11   67.16    4.50
 -12   2  11   74.30    5.03
 -12   2  11   76.38    8.27
 -12   2  11   75.93    9.55
  12  -2 -11   86.08    5.15
  12  -2 -11   61.32    9.59
  12  -2 -11   89.05   21.97
 -12   2  12   22.75    2.11
 -12   2  12   26.15    4.27
 -12   2  12   22.23    5.33
  12  -2 -12   18.69    2.24
  12  -2 -12   16.94    5.89
  12  -2 -12   24.77   16.16
 -12   2  13    3.17    1.55
  12  -2 -13    5.60    1.35
  12  -3  -1   46.56    2.79
  12  -3  -1   42.27    2.81
 -12   3   2   98.07    5.46
 -12   3   2   99.54    5.66
  12  -3  -2   99.30    5.47
  12  -3  -2   94.10    5.71
 -12   3   3   61.92    3.77
 -12   3   3   59.11    3.84
  12  -3  -3   59.75    3.70
  12  -3  -3   58.80    4.05
 -12   3   4   61.09    3.79
 -12   3   4   59.47    3.94
 -12   3   4   51.59    6.72
  12  -3  -4   64.14    3.90
  12  -3  -4   64.80    4.31
  12  -3  -4   64.68    7.14
  12  -3  -4   82.99   13.11
 -12   3   5  184.41   10.19
 -12   3   5  199.10   16.59
 -12   3   5  192.37   16.27
  12  -3  -5  216.61   11.17
  12  -3  -5  193.31   10.81
  12  -3  -5  209.55   16.90
  12  -3  -5  361.10   40.15
 -12   3   6  102.77    6.13
 -12   3   6  105.36    6.42
 -12   3   6  121.08   11.25
 -12   3   6  119.60   10.87
  12  -3  -6  116.88    6.59
  12  -3  -6  103.69    6.52
 -12   3   7   29.45    2.44
 -12   3   7   28.29    2.71
 -12   3   7   43.13    5.86
 -12   3   7   35.96    5.13
  12  -3  -7   35.83    2.75
  12  -3  -7   29.80    2.89
  12  -3  -7   40.58    5.61
  12  -3  -7   49.39   26.78
 -12   3   8   31.22    2.59
 -12   3   8   44.81    6.25
 -12   3   8   35.71    5.36
  12  -3  -8   34.63    3.17
  12  -3  -8   48.69    6.19
  12  -3  -8   49.32   26.26
 -12   3   9   27.92    2.85
 -12   3   9   44.13    6.23
 -12   3   9   35.44    5.35
  12  -3  -9   35.90    2.82
  12  -3  -9   32.42    6.09
  12  -3  -9   20.58   25.37
 -12   3  10    3.50    0.93
 -12   3  10    5.04    1.53
 -12   3  10    3.30    2.99
 -12   3  10    4.65    2.19
  12  -3 -10    4.27    1.30
  12  -3 -10    5.43    1.47
  12  -3 -10    2.64    3.10
 -12   3  11   18.68    1.82
 -12   3  11   21.29    2.45
 -12   3  11   10.47    4.53
 -12   3  11   19.33    3.97
  12  -3 -11   17.95    2.02
  12  -3 -11   13.64    4.62
  12  -3 -11    3.83   19.11
 -12   3  12   25.49    2.30
 -12   3  12   29.95    3.02
 -12   3  12   24.22    5.11
  12  -3 -12   31.40    2.67
  12  -3 -12   23.88    5.53
  12  -3 -12   21.88   17.05
 -12   3  13   61.56    4.73
  12  -3 -13   69.85    4.64
 -12   4   2   33.43    2.46
  12  -4  -2   39.44    2.43
 -12   4   3   33.64    2.31
 -12   4   3   31.30    2.58
 -12   4   3   33.63    4.89
 -12   4   3   38.98    4.98
  12  -4  -3   34.85    2.42
  12  -4  -3   28.00    2.49
  12  -4  -3   41.76    5.05
  12  -4  -3   51.12    7.26
 -12   4   4    9.76    1.59
 -12   4   4   14.59    2.86
 -12   4   4   13.64    2.78
  12  -4  -4   10.02    1.29
  12  -4  -4    6.47    1.44
  12  -4  -4   14.72    2.86
  12  -4  -4   18.91   13.61
 -12   4   5    0.34    0.54
 -12   4   5    0.91    1.00
 -12   4   5    0.95    1.31
 -12   4   5    0.46    0.95
  12  -4  -5    1.54    0.74
  12  -4  -5    1.10    1.07
  12  -4  -5    1.31    1.15
  12  -4  -5   39.82   24.75
 -12   4   6   28.04    2.26
 -12   4   6   29.61    2.92
 -12   4   6   29.43    5.12
  12  -4  -6   32.24    2.91
  12  -4  -6   34.15    4.85
  12  -4  -6   81.55   33.52
 -12   4   7  103.28    6.16
 -12   4   7  101.59    6.45
 -12   4   7  120.00   10.90
  12  -4  -7  109.05    6.39
  12  -4  -7  119.40   11.01
 -12   4   8   67.12    4.38
 -12   4   8   65.43    4.75
 -12   4   8   75.71    8.92
 -12   4   8   82.77    8.36
  12  -4  -8   69.94    4.56
  12  -4  -8   72.69    5.01
  12  -4  -8   81.72    8.54
  12  -4  -8   90.56   36.59
 -12   4   9   30.54    2.45
 -12   4   9   27.69    2.89
 -12   4   9   37.53    5.79
  12  -4  -9   26.23    2.49
  12  -4  -9   33.02    3.08
  12  -4  -9   78.44   32.07
 -12   4  10   74.45    4.90
 -12   4  10   77.14    5.46
 -12   4  10   89.64    9.23
  12  -4 -10   90.90    5.48
  12  -4 -10   95.60    6.15
  12  -4 -10   85.40    9.42
 -12   4  11  158.11    9.20
 -12   4  11  158.61   10.07
 -12   4  11  219.32   17.94
 -12   4  11  178.63   15.46
  12  -4 -11  200.62   11.12
  12  -4 -11  181.52   15.91
  12  -4 -11  160.71   32.16
 -12   4  12  132.76    7.64
 -12   4  12  134.48    8.25
  12  -4 -12  136.61    7.88
  12  -4 -12  130.11   12.98
  12  -4 -12  109.46   27.00
 -12   4  13   48.25    3.50
 -12   4  13   39.64    3.93
  12  -4 -13   57.06    4.02
  12  -4 -14   24.28    2.77
 -12   5   1    4.62    2.19
  12  -5  -1    5.83    1.95
  12  -5  -1    7.91    2.57
 -12   5   2  107.11   10.48
 -12   5   2  118.43   10.85
 -12   5   3   89.21    5.18
 -12   5   3   79.73    8.90
 -12   5   3   91.58    9.17
  12  -5  -3   93.42    9.10
  12  -5  -3  134.33   14.87
 -12   5   4   76.22    4.51
 -12   5   4   75.48    4.91
 -12   5   4   76.65    8.46
 -12   5   4   84.52    8.59
  12  -5  -4   78.10    4.64
  12  -5  -4   76.55    4.90
  12  -5  -4   92.41    8.66
  12  -5  -4  123.36   20.01
 -12   5   5  222.68   12.09
 -12   5   5  216.85   18.15
  12  -5  -5  224.89   11.85
  12  -5  -5  387.88   44.70
 -12   5   6  187.29   10.23
 -12   5   6  190.18   10.82
 -12   5   6  200.22   16.91
 -12   5   6  210.79   16.80
  12  -5  -6  201.69   10.74
  12  -5  -6  177.87   10.41
  12  -5  -6  225.23   17.10
  12  -5  -6  330.94   51.08
 -12   5   7   54.51    3.67
 -12   5   7   47.37    4.02
 -12   5   7   64.61    7.79
 -12   5   7   67.19    7.26
  12  -5  -7   57.88    3.94
  12  -5  -7   57.55    4.29
  12  -5  -7   71.46    7.35
  12  -5  -7   90.16   41.33
 -12   5   8  110.57    6.57
 -12   5   8  106.17    7.02
 -12   5   8  138.78   12.66
 -12   5   8  136.17   11.83
  12  -5  -8  119.75    6.99
  12  -5  -8  109.67    7.09
  12  -5  -8  137.17   11.87
  12  -5  -8  172.90   43.86
 -12   5   9   32.22    2.59
 -12   5   9   40.63    6.29
 -12   5   9   36.11    5.32
  12  -5  -9   29.01    3.06
  12  -5  -9   43.00    5.57
  12  -5  -9   75.77   37.57
 -12   5  10    2.84    0.88
 -12   5  10    0.55    1.29
 -12   5  10    3.46    1.80
  12  -5 -10    2.57    1.08
  12  -5 -10    5.10    2.18
  12  -5 -10  -11.61   25.88
 -12   5  11    9.58    1.37
 -12   5  11    6.44    1.91
 -12   5  11   13.82    4.30
 -12   5  11    8.85    2.82
  12  -5 -11    9.46    1.69
  12  -5 -11    8.08    1.82
  12  -5 -11   11.50    3.27
  12  -5 -11    4.98   24.99
 -12   5  12   14.38    2.45
  12  -5 -12   18.42    2.31
  12  -5 -12   19.54    4.35
  12  -5 -12   21.40   18.82
 -12   5  13    5.86    1.21
 -12   5  13    6.19    2.03
  12  -5 -13    4.90    1.65
 -12   6   1   29.56    6.29
  12  -6  -1   39.21    5.42
  12  -6  -1   44.16    7.00
  12  -6  -2   68.16    7.93
  12  -6  -2   97.89   11.67
 -12   6   3  138.39   13.00
  12  -6  -3  246.18   22.17
 -12   6   4   47.80    3.52
 -12   6   4   64.66    7.27
 -12   6   4   60.94    7.33
  12  -6  -4   74.95    7.35
  12  -6  -4   56.27   17.95
 -12   6   5   11.48    1.21
 -12   6   5   16.11    3.32
 -12   6   5   15.41    3.25
  12  -6  -5    8.18    1.57
  12  -6  -5   18.66    3.14
  12  -6  -5   16.85   25.32
 -12   6   6    7.66    1.07
 -12   6   6    3.44    1.65
 -12   6   6   10.49    2.98
 -12   6   6    8.33    2.50
  12  -6  -6    7.45    1.19
  12  -6  -6    3.90    1.54
  12  -6  -6   12.39    2.47
  12  -6  -6   35.84   38.20
 -12   6   7    4.94    0.92
 -12   6   7    6.35    1.79
 -12   6   7    9.12    2.96
 -12   6   7    5.04    2.15
  12  -6  -7    6.42    1.31
  12  -6  -7    5.54    1.68
  12  -6  -7    6.70    2.17
  12  -6  -7   13.92   45.95
 -12   6   8    8.93    1.94
 -12   6   8    7.70    3.29
 -12   6   8   12.55    2.83
  12  -6  -8    8.82    1.60
  12  -6  -8    1.64   38.59
 -12   6   9    1.18    0.68
 -12   6   9    0.18    1.37
 -12   6   9   -1.57    2.21
 -12   6   9    0.72    1.35
  12  -6  -9    1.33    1.08
  12  -6  -9    0.83    1.39
  12  -6  -9    2.25    1.46
  12  -6  -9    6.44   38.51
 -12   6  10   41.36    3.10
 -12   6  10   40.08    3.84
 -12   6  10   46.46    7.10
 -12   6  10   44.74    6.08
  12  -6 -10   41.36    3.34
  12  -6 -10   47.17    4.08
  12  -6 -10   52.27    6.29
  12  -6 -10   98.59   35.49
 -12   6  11   79.60    5.14
 -12   6  11   82.40    6.09
  12  -6 -11   88.91    5.69
  12  -6 -11   99.70    6.38
  12  -6 -11   90.26    9.50
  12  -6 -11  114.05   32.72
 -12   6  12   95.13    5.85
 -12   6  12   99.22    6.82
  12  -6 -12  103.66    6.45
  12  -6 -12   24.82   21.64
 -12   6  13  112.09    6.76
 -12   6  13   98.29    7.02
  12  -6 -13  130.55    7.67
 -12   7   1    3.94    1.77
 -12   7   1    5.13    5.90
  12  -7  -1    2.86    2.15
 -12   7   2    6.69    2.17
 -12   7   2    5.66    4.50
  12  -7  -2    6.05    2.43
 -12   7   3    3.78    3.23
  12  -7  -3    3.67    1.94
 -12   7   4   31.34    5.72
  12  -7  -4   34.89    5.08
  12  -7  -4   30.99   19.99
 -12   7   5   98.29    6.05
 -12   7   5  107.64   10.91
 -12   7   5  115.88   11.27
  12  -7  -5  127.46   11.09
  12  -7  -5  134.34   33.74
 -12   7   6   52.28    3.34
 -12   7   6   53.00    4.26
 -12   7   6   61.08    7.25
 -12   7   6   65.95    7.32
  12  -7  -6   38.74    3.49
  12  -7  -6   70.90    7.07
  12  -7  -6  140.21   48.27
 -12   7   7   48.27    3.19
 -12   7   7   39.09    3.72
 -12   7   7   51.57    6.72
 -12   7   7   48.87    6.40
  12  -7  -7   47.98    3.44
  12  -7  -7   37.63    3.51
  12  -7  -7   53.49    6.26
  12  -7  -7   80.01   45.59
 -12   7   8   46.54    3.31
 -12   7   8   40.44    4.02
 -12   7   8   61.77    7.49
 -12   7   8   57.53    6.76
  12  -7  -8   45.17    3.59
  12  -7  -8   47.58    4.07
  12  -7  -8   62.41    6.69
  12  -7  -8   24.79   46.43
 -12   7   9   89.21    5.53
 -12   7   9   99.20    6.77
 -12   7   9   99.10   10.02
  12  -7  -9   90.66    5.87
  12  -7  -9   91.27    6.25
  12  -7  -9  116.88   10.30
  12  -7  -9  139.84   45.31
 -12   7  10   86.58    5.53
 -12   7  10  108.83   11.49
 -12   7  10  102.78   10.20
  12  -7 -10   93.71    6.48
  12  -7 -10  109.87   10.28
  12  -7 -10  130.61   38.64
 -12   7  11   90.71    5.74
 -12   7  11   83.97    6.63
  12  -7 -11  106.24    6.53
  12  -7 -11  103.43    6.76
  12  -7 -11  123.07   10.91
  12  -7 -11  105.59   34.39
 -12   7  12   33.00    2.72
 -12   7  13    1.81    0.96
 -12   7  13    0.31    1.72
 -12   8   2   78.61    8.70
 -12   8   2   75.67   12.76
  12  -8  -2   84.55    9.09
  12  -8  -2  100.84   14.49
  12  -8  -3   57.38    7.14
  12  -8  -3   52.88   16.38
  12  -8  -4   49.59    6.51
  12  -8  -4   80.40   22.35
  12  -8  -5  111.16   10.83
  12  -8  -5  129.69   36.48
 -12   8   6  120.60    7.44
 -12   8   6  145.07   12.86
  12  -8  -6  193.80   45.93
 -12   8   7   26.93    2.15
 -12   8   7   21.76    3.32
 -12   8   7   32.73    5.40
 -12   8   7   36.65    5.47
  12  -8  -7   43.47    5.16
  12  -8  -7   50.41   46.65
 -12   8   8    4.59    0.95
 -12   8   8    0.25    2.12
 -12   8   8    4.51    2.44
  12  -8  -8    4.95    2.04
 -12   8   9    4.39    2.06
  12  -8  -9    8.71    2.55
  12  -8  -9   30.85   37.08
 -12   8  10    0.13    0.70
 -12   8  10   -0.35    1.74
  12  -8 -10    0.74    1.45
  12  -8 -10    4.90   28.97
 -12   9   1   20.35    4.09
 -12   9   1   16.01   12.64
  12  -9  -1   23.19    4.82
  12  -9  -1   35.07    8.29
 -12   9   2    3.94    1.81
 -12   9   2   -0.75    7.62
  12  -9  -2    1.77    2.43
  12  -9  -2   11.50    8.97
 -12   9   3    6.89    2.29
 -12   9   3    3.38    6.06
  12  -9  -3    4.72    2.70
  12  -9  -3   -5.84   14.06
 -12   9   4    8.03    2.72
 -12   9   4   12.17    5.78
  12  -9  -4    9.01    2.94
  12  -9  -4   36.06   20.57
 -12   9   5    0.95    1.33
 -12   9   5   -3.44    3.95
  12  -9  -5    0.12    1.43
  12  -9  -5  -21.33   29.43
 -12   9   6   -0.51    1.48
 -12   9   6    4.21    3.26
  12  -9  -6    1.86    1.51
  12  -9  -7   35.20    5.33
  12  -9  -7   17.72   39.05
  12 -10  -2    5.91    3.48
  12 -10  -2   11.20    7.56
  12 -10  -3   25.41    5.15
  12 -10  -3   24.39   10.22
  12 -10  -4   31.49    5.36
  12 -10  -4   15.39   11.51
  11  17  -1   14.68    3.57
 -11 -16   1    9.91    4.99
  11  16  -1  -17.10   25.38
 -11 -16   2    4.99    4.72
  11  16  -2    5.58    9.71
  11  16  -2    5.26    2.19
 -11 -16   3   -0.10    4.10
  11  16  -3    0.96    6.69
  11  16  -3    3.02    1.77
 -11 -15   1   70.86    4.60
 -11 -15   1   72.63    9.67
 -11 -15   1   64.50    8.19
  11  15  -1   67.34    4.35
  11  15  -1   87.26   35.96
  11  15  -1   71.00    8.05
 -11 -15   2   80.19   10.05
  11  15  -2   72.90   36.49
  11  15  -2   65.77    7.96
  11  15  -3   41.03   21.40
  11  15  -3   39.73    5.75
  11  15  -4   27.28    4.69
 -11 -14   1   25.26    2.38
 -11 -14   1   26.19    5.88
  11  14  -1   30.76    2.44
  11  14  -1   17.35   35.41
 -11 -14   2    1.78    1.17
 -11 -14   2    3.53    3.48
 -11 -14   2    1.86    1.90
  11  14  -2    2.25    1.06
  11  14  -2  -12.06   29.92
  11  14  -2    2.15    1.58
 -11 -14   3   10.94    3.27
  11  14  -3   14.08    3.20
 -11 -14   4    4.32    4.03
  11  14  -4   36.24   22.78
  11  14  -4    1.58    1.63
 -11 -14   5    7.40    4.53
  11  14  -5   -7.26   13.81
  11  14  -5   11.30    2.96
 -11 -13   1    2.91    0.79
 -11 -13   1    2.69    1.05
 -11 -13   1    4.22    3.52
 -11 -13   1    2.44    2.22
  11  13  -1    5.63    1.12
  11  13  -1    8.25   32.05
  11  13  -1    3.77    1.79
 -11 -13   2   46.16    3.18
 -11 -13   2   39.82    3.09
 -11 -13   2   39.00    7.03
 -11 -13   2   38.22    5.89
  11  13  -2   47.27    3.23
  11  13  -2   40.07   35.61
  11  13  -2   39.17    5.81
 -11 -13   3  108.38    6.34
 -11 -13   3   99.64   11.49
 -11 -13   3  103.25   10.45
  11  13  -3  108.93    6.26
  11  13  -3   78.15   43.94
  11  13  -3  100.14   10.38
 -11 -13   4   82.75    5.64
 -11 -13   4  110.96   11.52
 -11 -13   4   95.06    9.68
  11  13  -4   93.28    5.94
  11  13  -4  119.76   40.85
  11  13  -4   95.19    9.78
 -11 -13   5   77.63   10.00
  11  13  -5   47.07   26.60
 -11 -13   6   92.29   11.19
 -11 -12   1  131.85    7.53
 -11 -12   1  126.30    7.35
 -11 -12   1  142.96   13.57
 -11 -12   1  136.39   12.46
  11  12  -1  128.77    7.33
  11  12  -1  191.60   39.68
  11  12  -1  132.97   12.32
 -11 -12   2   84.54    5.14
 -11 -12   2   81.12    5.11
 -11 -12   2   84.42   10.07
 -11 -12   2   85.11    9.03
  11  12  -2   86.24    5.18
  11  12  -2  106.68   37.65
  11  12  -2   80.08    8.85
 -11 -12   3   95.61    5.70
 -11 -12   3   87.86    5.53
 -11 -12   3  110.76   11.39
 -11 -12   3   95.76    9.72
  11  12  -3   95.80    5.70
  11  12  -3   49.94   40.41
  11  12  -3   89.44    9.62
 -11 -12   4   51.99    3.58
 -11 -12   4   50.93    7.67
  11  12  -4   52.89    3.59
  11  12  -4   95.85   41.12
  11  12  -4   43.73    6.40
 -11 -12   5    2.96    1.35
 -11 -12   5    2.72    3.47
 -11 -12   5    3.07    1.71
  11  12  -5    2.34    1.12
  11  12  -5   -1.06   32.30
  11  12  -5    3.13    1.85
 -11 -12   6    2.05    3.43
  11  12  -6   -5.79   29.68
  11  12  -6    1.95    1.70
 -11 -12   7    2.34    3.77
  11  12  -7   24.01   17.55
  11  12  -7    5.21    2.33
 -11 -11   1   -0.02    0.46
 -11 -11   1    0.49    0.84
 -11 -11   1    1.83    2.66
 -11 -11   1   -0.58    1.21
  11  11  -1    0.78    0.72
  11  11  -1  -14.54   26.47
  11  11  -1   -0.25    0.90
 -11 -11   2  140.08    7.85
 -11 -11   2  138.10    7.69
 -11 -11   2  123.10   13.04
  11  11  -2  125.73   38.20
 -11 -11   3   74.68    4.68
 -11 -11   3   73.53    4.65
 -11 -11   3   77.70    9.28
 -11 -11   3   71.66    8.15
  11  11  -3   79.23    4.77
  11  11  -3   71.02   33.14
  11  11  -3   68.39    8.14
 -11 -11   4    6.18    1.02
 -11 -11   4    5.08    2.11
  11  11  -4    4.17    2.12
 -11 -11   5   46.92    3.38
 -11 -11   5   42.89    7.33
  11  11  -5   49.81    3.48
  11  11  -5   20.60   38.32
 -11 -11   6  104.03    6.21
 -11 -11   6  115.70   12.05
 -11 -11   6   96.98   10.20
  11  11  -6  107.97    6.35
  11  11  -6  132.73   46.81
  11  11  -6  108.26   10.76
 -11 -11   7   58.49    8.70
  11  11  -7   36.01   31.88
  11  11  -7   58.10    7.38
 -11 -11   8   29.94    5.69
  11  11  -8    2.39   13.99
  11  11  -8   26.46    4.92
 -11 -10   1  220.10   11.64
 -11 -10   1  210.27   11.33
 -11 -10   1  224.94   18.59
 -11 -10   1  202.28   17.18
  11  10  -1  229.04   11.77
  11  10  -1  196.96   11.34
  11  10  -1  230.55   37.28
  11  10  -1  213.27   17.49
 -11 -10   2   88.20    5.45
 -11 -10   2   92.03    5.61
 -11 -10   2   95.17    9.50
  11  10  -2   98.60    5.72
  11  10  -2   90.05    5.99
  11  10  -2   92.18    9.51
 -11 -10   3   60.20    4.07
 -11 -10   3   76.82    8.59
 -11 -10   3   61.08    7.34
  11  10  -3   65.49    4.16
  11  10  -3    0.25   29.48
 -11 -10   4   11.74    1.42
 -11 -10   4   10.89    1.58
 -11 -10   4   16.24    4.50
 -11 -10   4   13.20    3.08
  11  10  -4   15.33    1.73
  11  10  -4   47.99   36.98
  11  10  -4   13.67    3.19
 -11 -10   5   41.09    3.00
 -11 -10   5   40.26    5.62
  11  10  -5   39.26    5.82
 -11 -10   6   84.00    5.21
 -11 -10   6   83.79    9.98
  11  10  -6   97.31    5.70
  11  10  -6   94.73   44.78
 -11 -10   7   29.80    2.66
 -11 -10   7   29.85    5.87
 -11 -10   7   31.17    4.82
  11  10  -7   31.24    2.62
  11  10  -7   37.84   43.08
  11  10  -7   29.01    5.21
 -11 -10   8    1.72    2.82
  11  10  -8   29.72   30.51
  11  10  -8    2.36    2.23
 -11 -10   9   13.01    4.18
  11  10  -9    9.09    8.94
  11  10  -9   12.84    3.76
 -11  -9   1    3.88    0.86
 -11  -9   1    4.00    1.08
 -11  -9   1    3.49    2.36
 -11  -9   1    3.72    1.67
  11   9  -1    3.30    0.93
  11   9  -1    3.57    1.14
  11   9  -1   -9.85   20.13
  11   9  -1    4.40    1.72
 -11  -9   2    2.55    0.74
 -11  -9   2    2.57    1.04
 -11  -9   2    2.57    2.34
 -11  -9   2    1.43    1.36
  11   9  -2    3.13    0.90
  11   9  -2    1.16    1.10
  11   9  -2   20.63   27.53
  11   9  -2    1.76    1.46
 -11  -9   3    0.09    1.08
  11   9  -3    0.51    0.95
  11   9  -3    3.15    1.33
 -11  -9   4    1.67    0.67
 -11  -9   4    2.22    1.12
 -11  -9   4    4.69    2.93
 -11  -9   4    1.36    1.30
  11   9  -4    1.91    0.95
  11   9  -4   -9.39   29.31
  11   9  -4    1.73    1.58
 -11  -9   5    3.51    0.81
 -11  -9   5    2.55    1.16
 -11  -9   5    4.37    2.77
 -11  -9   5    3.02    1.66
  11   9  -5    3.81    1.10
  11   9  -5   44.89   42.04
  11   9  -5    2.17    1.96
 -11  -9   6   34.61    2.71
 -11  -9   6   40.35    5.47
  11   9  -6   38.68    5.77
 -11  -9   7   23.57    2.38
 -11  -9   7   24.43    5.26
  11   9  -7   33.06    2.63
  11   9  -7   43.46   41.57
 -11  -9   8   53.88    3.88
 -11  -9   8   58.87    7.97
 -11  -9   8   60.04    7.03
  11   9  -8   69.89   33.20
  11   9  -8   56.01    7.63
 -11  -9   9   82.16    9.43
  11   9  -9   20.65   17.47
 -11  -9  10   38.06    6.67
 -11  -8   1  126.01    6.99
 -11  -8   1  126.63    6.95
 -11  -8   1  116.49   11.44
 -11  -8   1   99.58   10.55
  11   8  -1  130.62    6.98
  11   8  -1  107.47    6.74
 -11  -8   2   25.60    2.12
 -11  -8   2   22.03    2.07
 -11  -8   2   17.87    4.34
  11   8  -2   22.45    1.98
  11   8  -2   23.67    2.39
  11   8  -2   35.30   22.48
 -11  -8   3   58.23    3.77
 -11  -8   3   54.98    3.69
 -11  -8   3   49.71    7.09
 -11  -8   3   50.37    6.51
  11   8  -3   59.57    3.79
  11   8  -3   50.33    3.93
  11   8  -3   62.40   31.10
  11   8  -3   54.47    6.83
 -11  -8   4  108.78    6.15
 -11  -8   4   91.42    9.69
  11   8  -4   95.17    6.17
  11   8  -4  102.24   10.24
 -11  -8   5  188.60   10.07
 -11  -8   5  175.73    9.63
 -11  -8   5  182.57   16.10
 -11  -8   5  169.40   15.05
  11   8  -5  186.71    9.97
  11   8  -5  199.49   44.02
  11   8  -5  176.07   15.65
 -11  -8   6  157.24    8.51
 -11  -8   6  146.53    8.16
 -11  -8   6  153.40   14.00
 -11  -8   6  135.46   12.85
  11   8  -6  146.32    8.17
  11   8  -6   99.46   36.05
  11   8  -6  140.14   13.51
 -11  -8   7   91.35    9.72
  11   8  -7  108.47   11.00
 -11  -8   8    9.94    1.75
 -11  -8   8   15.91    3.98
 -11  -8   8   12.60    3.28
  11   8  -8   15.57    1.78
  11   8  -8  -31.82   33.88
  11   8  -8   13.99    4.12
 -11  -8   9    4.48    2.74
 -11  -8   9    3.31    1.95
  11   8  -9    4.07   25.35
  11   8  -9    3.33    3.44
 -11  -8  10   13.28    3.63
  11   8 -10    3.84    9.99
  11   8 -10    5.69    3.34
 -11  -8  11   -0.93    3.05
  11   8 -11    1.43    3.28
  11   8 -11    8.52    3.71
 -11  -7   1  185.60    9.49
 -11  -7   1  159.70   13.89
 -11  -7   1  137.91   13.02
  11   7  -1  154.12    8.79
  11   7  -1  160.50   24.57
  11   7  -1  145.12   13.42
 -11  -7   2   29.08    2.30
 -11  -7   2   25.83    2.20
  11   7  -2   28.70    2.27
  11   7  -2   27.76    2.59
  11   7  -2   49.54   21.25
  11   7  -2   22.59    4.45
 -11  -7   3   38.83    2.84
 -11  -7   3   38.80    2.87
 -11  -7   3   35.58    5.77
  11   7  -3   42.46    2.94
  11   7  -3   32.73    3.01
  11   7  -3   49.33   25.88
 -11  -7   4  161.14    8.38
 -11  -7   4  133.70    7.48
 -11  -7   4  148.12   13.11
 -11  -7   4  114.87   11.77
  11   7  -4  133.85    7.48
  11   7  -4  135.73    8.00
  11   7  -4  151.32   38.38
  11   7  -4  122.53   12.41
 -11  -7   5   32.95    2.57
 -11  -7   5   34.12    5.00
  11   7  -5   29.92    2.87
  11   7  -5   36.69    5.62
 -11  -7   6   96.37    5.64
 -11  -7   6   87.98    5.39
 -11  -7   6   85.58    9.85
  11   7  -6   93.75    5.58
  11   7  -6   95.18   33.28
 -11  -7   7   52.96    3.63
 -11  -7   7   53.00    3.68
 -11  -7   7   54.93    7.23
 -11  -7   7   52.50    6.70
  11   7  -7   52.44    3.67
  11   7  -7   83.73   34.33
  11   7  -7   60.95    7.79
 -11  -7   8   20.79    1.92
 -11  -7   8   18.07    2.27
 -11  -7   8   17.71    4.43
 -11  -7   8   21.52    4.01
  11   7  -8   25.00    2.32
  11   7  -8   33.03   30.96
  11   7  -8   22.31    4.93
 -11  -7   9   50.94    3.68
  11   7  -9   46.40    3.40
  11   7  -9   45.54   31.06
  11   7  -9   59.85    8.24
 -11  -7  10   29.26    4.93
  11   7 -10   34.48    6.61
 -11  -7  11   30.84    5.28
  11   7 -11    7.58    6.61
  11   7 -11   30.27    6.43
 -11  -6   1    0.64    0.55
 -11  -6   1   -0.84    0.83
 -11  -6   1    0.50    1.08
  11   6  -1    0.19    0.64
  11   6  -1   -0.12    0.89
  11   6  -1    8.37    9.15
  11   6  -1   -0.10    1.63
 -11  -6   2   76.03    4.53
 -11  -6   2   65.71    7.79
 -11  -6   2   62.84    7.44
  11   6  -2   66.32    4.52
 -11  -6   3  184.83   10.35
 -11  -6   3  209.18   10.94
 -11  -6   3  207.88   17.13
 -11  -6   3  189.30   16.32
  11   6  -3  213.24   11.06
  11   6  -3  198.73   11.04
  11   6  -3  254.34   37.50
  11   6  -3  204.94   17.32
 -11  -6   4   78.29    4.78
 -11  -6   4   79.31    4.77
 -11  -6   4   65.04    8.29
  11   6  -4   76.82    4.70
  11   6  -4   71.23    4.94
  11   6  -4   67.49   25.63
  11   6  -4   81.65    9.05
 -11  -6   5   87.78    5.29
 -11  -6   5   90.32    5.31
 -11  -6   5   89.31    9.52
 -11  -6   5   78.41    8.87
  11   6  -5   89.85    5.34
  11   6  -5   85.15    5.57
  11   6  -5  114.58   28.82
  11   6  -5   84.73    9.78
 -11  -6   6  142.49    7.72
 -11  -6   6  125.20   12.34
 -11  -6   6  118.42   11.75
  11   6  -6  137.58    8.02
  11   6  -6  139.72   31.83
  11   6  -6  118.29   12.71
 -11  -6   7  124.55    7.26
 -11  -6   7  136.08   12.81
  11   6  -7  159.49    8.32
  11   6  -7  160.42   32.60
  11   6  -7  111.05   12.98
 -11  -6   8   89.20    5.29
 -11  -6   8   82.38    5.15
 -11  -6   8   80.63    9.23
 -11  -6   8   73.67    8.73
  11   6  -8   89.40    5.32
  11   6  -8   68.60   23.73
  11   6  -8   77.76   10.11
 -11  -6   9   41.74    2.99
 -11  -6   9   36.23    3.11
 -11  -6   9   39.32    6.02
 -11  -6   9   37.44    5.70
  11   6  -9   41.10    3.06
  11   6  -9   56.63   26.95
  11   6  -9   36.05    7.30
 -11  -6  10   56.44    3.94
 -11  -6  10   58.54    7.37
 -11  -6  10   54.27    6.98
  11   6 -10   53.07    3.71
  11   6 -10   49.95   23.88
  11   6 -10   40.43    8.65
 -11  -6  11   27.31    5.05
  11   6 -11   10.82   12.15
  11   6 -11   22.70    6.63
 -11  -6  12   18.51    4.07
  11   6 -12    3.14    5.15
  11   6 -12   15.66    5.51
 -11  -5   1  282.74   14.48
 -11  -5   1  260.60   13.71
  11   5  -1  273.71   14.04
  11   5  -1  263.77   14.18
 -11  -5   2  312.24   15.50
 -11  -5   2  284.89   14.57
 -11  -5   2  274.79   21.53
 -11  -5   2  272.94   21.35
  11   5  -2  279.35   14.40
  11   5  -2  251.17   14.01
  11   5  -2  271.23   28.21
  11   5  -2  275.77   22.25
 -11  -5   3  131.84    7.47
 -11  -5   3  145.03    7.81
 -11  -5   3  137.77   12.52
 -11  -5   3  125.45   12.04
  11   5  -3  132.00    7.36
  11   5  -3  134.92    7.85
 -11  -5   4  260.07   13.19
 -11  -5   4  224.31   12.05
 -11  -5   4  239.53   19.20
 -11  -5   4  220.49   18.54
  11   5  -4  241.33   12.56
  11   5  -4  216.90   12.24
  11   5  -4  255.93   34.87
  11   5  -4  250.03   20.37
 -11  -5   5   62.13    3.95
 -11  -5   5   55.72    3.78
 -11  -5   5   57.93    7.24
 -11  -5   5   51.69    6.89
  11   5  -5   63.43    3.99
  11   5  -5   55.88    4.11
  11   5  -5   71.05   22.96
  11   5  -5   60.04    8.33
 -11  -5   6   11.66    1.38
 -11  -5   6   13.17    1.71
 -11  -5   6   17.33    3.45
 -11  -5   6   11.26    3.00
  11   5  -6   13.92    1.64
  11   5  -6    8.58    1.71
  11   5  -6   -7.82   16.22
  11   5  -6   11.14    4.55
 -11  -5   7   39.23    2.80
 -11  -5   7   30.35    2.78
 -11  -5   7   38.59    5.52
 -11  -5   7   29.77    5.16
  11   5  -7   37.75    3.00
  11   5  -7   33.72    3.05
  11   5  -7   37.28   20.54
  11   5  -7   32.52    6.86
 -11  -5   8    4.03    0.92
 -11  -5   8    3.61    1.22
  11   5  -8    4.74    1.13
  11   5  -8  -13.84   15.75
  11   5  -8    2.98    4.46
 -11  -5   9   12.17    1.45
 -11  -5   9   12.54    1.76
 -11  -5   9    7.31    3.27
 -11  -5   9   10.56    3.16
  11   5  -9   17.72    1.83
  11   5  -9    7.00   16.62
  11   5  -9   14.61    5.98
 -11  -5  10   10.10    1.78
 -11  -5  10   11.51    3.32
  11   5 -10   14.56    1.76
  11   5 -10   25.09   20.49
 -11  -5  11    4.43    1.61
 -11  -5  11    6.62    2.57
 -11  -5  11    5.84    2.30
  11   5 -11    4.72    1.30
  11   5 -11   -1.99   12.58
  11   5 -11    4.80    5.29
 -11  -5  12   53.12    6.75
  11   5 -12   24.48    9.26
  11   5 -12   38.63    8.25
 -11  -5  13   48.14    7.28
 -11  -4   1   75.90    4.54
  11   4  -1   72.95    4.40
 -11  -4   2   36.58    2.68
 -11  -4   2   36.34    2.64
 -11  -4   2   35.44    5.03
  11   4  -2   34.20    2.56
  11   4  -2   38.73    2.99
  11   4  -2   33.68    6.20
 -11  -4   3   10.05    1.27
 -11  -4   3    9.11    1.47
 -11  -4   3   11.59    2.88
 -11  -4   3   12.95    2.85
  11   4  -3   12.32    1.47
  11   4  -3    9.16    1.51
 -11  -4   4    0.31    0.54
 -11  -4   4   -0.72    1.05
 -11  -4   4    2.11    1.24
 -11  -4   4   -0.18    1.18
  11   4  -4    0.17    0.76
  11   4  -4    0.10    0.78
  11   4  -4   -7.41   15.16
  11   4  -4   -4.93    3.86
 -11  -4   5   21.16    1.90
 -11  -4   5   24.45    2.17
 -11  -4   5   16.24    3.91
 -11  -4   5   18.34    3.90
  11   4  -5   24.44    2.11
  11   4  -5   20.17    2.19
  11   4  -5   17.27   15.33
  11   4  -5   17.98    5.96
 -11  -4   6   51.54    3.46
 -11  -4   6   47.97    3.41
 -11  -4   6   43.47    6.32
 -11  -4   6   44.70    6.30
  11   4  -6   56.63    3.63
  11   4  -6   46.93    3.62
  11   4  -6   34.41   15.36
  11   4  -6   44.27    8.28
 -11  -4   7  206.00   10.75
 -11  -4   7  189.38   10.26
 -11  -4   7  171.88   15.77
 -11  -4   7  169.53   15.68
  11   4  -7  196.82   10.44
  11   4  -7  192.59   10.76
  11   4  -7  211.58   18.83
 -11  -4   8  140.85    7.74
 -11  -4   8  141.43    7.79
 -11  -4   8  123.82   12.22
 -11  -4   8  112.04   11.97
  11   4  -8  138.99    7.67
  11   4  -8  151.08   23.03
 -11  -4   9  202.69   10.70
 -11  -4   9  194.37   10.48
 -11  -4   9  185.00   16.24
 -11  -4   9  173.27   16.00
  11   4  -9  187.28   10.23
  11   4  -9  244.87   29.96
  11   4  -9  192.27   18.98
 -11  -4  10  249.38   13.24
 -11  -4  10  256.04   20.52
 -11  -4  10  222.23   19.71
  11   4 -10  314.88   33.87
  11   4 -10  300.03   25.32
 -11  -4  11   46.19    3.47
 -11  -4  11   40.50    6.10
 -11  -4  11   40.88    6.17
  11   4 -11   41.48    3.16
  11   4 -11   56.72   19.65
  11   4 -11   45.79    9.97
 -11  -4  12   13.37    3.36
 -11  -4  12    8.93    3.25
  11   4 -12    7.33    9.70
  11   4 -12   11.02    6.91
 -11  -4  13   44.04    5.57
  11   4 -13    8.44    6.10
  11   4 -13   23.02    8.19
 -11  -3   1  309.56   16.12
 -11  -3   1  316.93   16.20
  11   3  -1  325.36   16.43
  11   3  -1  316.66   16.56
 -11  -3   2   64.74    4.06
 -11  -3   2   62.24    3.96
  11   3  -2   64.94    4.01
  11   3  -2   61.36    4.21
 -11  -3   3   51.65    3.38
 -11  -3   3   49.56    3.31
 -11  -3   3   46.16    6.08
 -11  -3   3   48.81    6.13
  11   3  -3   46.79    3.21
  11   3  -3   43.95    3.40
 -11  -3   4  242.77   13.00
 -11  -3   4  245.97   13.01
 -11  -3   4  245.85   19.85
 -11  -3   4  256.72   20.21
  11   3  -4  275.11   13.85
  11   3  -4  246.67   13.39
  11   3  -4  275.87   28.85
  11   3  -4  254.67   21.88
 -11  -3   5  241.87   12.84
 -11  -3   5  252.02   19.79
 -11  -3   5  236.91   19.49
  11   3  -5  231.59   12.83
  11   3  -5  260.46   27.32
  11   3  -5  267.24   22.32
 -11  -3   6  271.55   15.01
 -11  -3   6  302.16   15.88
 -11  -3   6  330.97   24.47
  11   3  -6  330.69   16.69
  11   3  -6  314.25   16.59
  11   3  -6  393.36   32.71
  11   3  -6  322.21   26.80
 -11  -3   7  316.31   16.39
 -11  -3   7  304.16   16.03
 -11  -3   7  321.27   24.40
 -11  -3   7  300.82   24.01
  11   3  -7  303.70   15.99
  11   3  -7  302.59   16.38
  11   3  -7  379.96   32.17
  11   3  -7  365.63   28.50
 -11  -3   8   63.33    4.10
 -11  -3   8   56.87    4.04
 -11  -3   8   68.37    7.65
 -11  -3   8   59.13    7.61
  11   3  -8   72.66    4.42
  11   3  -8   54.88    4.27
  11   3  -8   58.73   14.43
  11   3  -8   74.54   11.59
 -11  -3   9    3.67    0.90
 -11  -3   9    4.40    1.39
 -11  -3   9    5.95    2.07
 -11  -3   9    3.26    2.17
  11   3  -9    3.64    1.13
  11   3  -9    6.50   10.09
  11   3  -9    1.25    6.47
 -11  -3  10    8.01    1.19
 -11  -3  10    6.50    1.65
 -11  -3  10   10.16    2.76
 -11  -3  10    7.14    2.80
  11   3 -10    9.01    1.52
  11   3 -10    1.49   11.49
  11   3 -10   10.36    7.93
 -11  -3  11    1.74    0.73
 -11  -3  11    1.04    1.23
 -11  -3  11    1.54    1.62
  11   3 -11    1.23    1.09
  11   3 -11    0.74   13.13
 -11  -3  12    7.85    1.70
 -11  -3  12    6.95    2.72
 -11  -3  12    8.91    3.02
  11   3 -12    9.68    1.51
  11   3 -12    7.85    9.06
  11   3 -12   -0.94    6.98
 -11  -3  13   22.23    4.15
  11   3 -13    7.24    5.48
  11   3 -13   16.47    7.94
 -11  -2   1  216.30   11.25
 -11  -2   1  202.00   10.74
  11   2  -1  211.58   11.03
  11   2  -1  201.91   11.05
 -11  -2   2  207.00   10.91
 -11  -2   2  193.33   10.42
  11   2  -2  220.42   11.22
  11   2  -2  195.77   10.84
 -11  -2   3   60.45    3.87
 -11  -2   3   61.16    3.89
  11   2  -3   67.44    4.06
  11   2  -3   55.19    3.94
 -11  -2   4   60.76    3.86
 -11  -2   4   53.79    3.67
 -11  -2   4   60.94    6.98
 -11  -2   4   64.97    7.22
  11   2  -4   61.59    3.88
  11   2  -4   50.57    3.80
  11   2  -4   53.56   13.07
  11   2  -4   65.00   10.62
 -11  -2   5   52.78    3.55
 -11  -2   5   48.33    3.50
 -11  -2   5   56.48    6.70
 -11  -2   5   60.28    6.99
  11   2  -5   54.77    3.61
  11   2  -5   50.34    3.76
  11   2  -5   65.54   11.48
  11   2  -5   65.05   10.18
 -11  -2   6    2.67    0.84
 -11  -2   6    6.23    1.87
 -11  -2   6    4.57    2.05
  11   2  -6    2.75    1.13
  11   2  -6    6.38    6.43
  11   2  -6   12.35    6.68
 -11  -2   7   46.11    3.30
 -11  -2   7   40.51    5.77
 -11  -2   7   37.86    5.95
  11   2  -7   42.70    3.09
  11   2  -7   43.67   10.48
  11   2  -7   42.27   10.15
 -11  -2   8  145.21    8.13
 -11  -2   8  147.54    8.28
 -11  -2   8  130.18   12.88
 -11  -2   8  138.53   13.37
  11   2  -8  159.10    8.57
  11   2  -8  156.68    8.83
  11   2  -8  176.35   18.90
 -11  -2   9  179.25    9.54
 -11  -2   9  159.94   14.39
 -11  -2   9  152.85   14.73
  11   2  -9  157.75    9.35
  11   2  -9  211.77   21.18
 -11  -2  10   70.49    4.54
 -11  -2  10   78.13    4.88
 -11  -2  10   71.33    8.24
 -11  -2  10   67.12    8.50
  11   2 -10   78.39    4.82
  11   2 -10   68.29   14.44
  11   2 -10   86.25   14.26
 -11  -2  11   13.98    1.52
 -11  -2  11   10.19    1.82
 -11  -2  11    8.70    3.05
 -11  -2  11   11.89    3.46
  11   2 -11   15.81    1.83
  11   2 -11   21.53   10.96
  11   2 -11   -7.44   10.56
 -11  -2  12   59.49    4.21
 -11  -2  12   55.71    7.19
 -11  -2  12   49.38    7.46
  11   2 -12   67.84    4.25
  11   2 -12   57.08   12.65
  11   2 -12   62.16   13.57
 -11  -2  13  115.85   10.67
  11   2 -13   75.78   12.23
  11   2 -13   79.78   13.92
  11   2 -14   42.32    7.61
  11   2 -14   53.46    9.65
 -11  -1   1    4.91    0.84
 -11  -1   1    5.09    1.08
  11   1  -1    5.66    1.01
  11   1  -1    4.35    1.05
 -11  -1   2    0.46    0.42
 -11  -1   2    2.65    0.98
  11   1  -2    0.53    0.78
  11   1  -2    0.91    0.82
 -11  -1   3   68.45    4.22
 -11  -1   3   69.02    4.25
  11   1  -3   67.90    4.21
  11   1  -3   66.15    4.40
 -11  -1   4   85.63    5.04
 -11  -1   4   75.32    8.38
  11   1  -4   85.01    4.98
  11   1  -4   84.59   11.58
 -11  -1   5  138.54    7.77
 -11  -1   5  132.87    7.58
 -11  -1   5  135.17   12.48
 -11  -1   5  143.30   12.97
  11   1  -5  142.97    7.82
  11   1  -5  140.04    8.10
  11   1  -5  170.14   15.98
  11   1  -5  134.91   16.24
 -11  -1   6  249.19   13.06
 -11  -1   6  261.95   13.43
 -11  -1   6  229.07   19.16
 -11  -1   6  248.59   20.04
  11   1  -6  226.94   12.38
  11   1  -6  248.70   13.35
  11   1  -6  268.03   22.56
  11   1  -6  265.49   23.65
 -11  -1   7  358.70   18.54
 -11  -1   7  352.81   18.41
 -11  -1   7  356.40   26.93
 -11  -1   7  354.77   27.32
  11   1  -7  370.68   18.83
  11   1  -7  361.33   18.93
  11   1  -7  395.42   30.58
  11   1  -7  378.39   31.31
 -11  -1   8  194.55   10.51
 -11  -1   8  200.52   10.76
 -11  -1   8  179.85   15.96
 -11  -1   8  197.99   16.93
  11   1  -8  201.46   10.69
  11   1  -8  188.64   10.72
  11   1  -8  214.70   19.72
  11   1  -8  203.08   21.55
 -11  -1   9   24.82    2.14
 -11  -1   9   23.96    2.36
 -11  -1   9   25.10    4.32
 -11  -1   9   26.58    4.90
  11   1  -9   27.93    2.41
  11   1  -9   21.95    2.49
  11   1  -9   29.94    7.75
  11   1  -9   24.59   10.84
 -11  -1  10   11.82    1.46
 -11  -1  10   13.91    1.90
 -11  -1  10   12.81    3.05
 -11  -1  10    8.52    3.38
  11   1 -10   12.59    1.60
  11   1 -10   17.42    7.20
  11   1 -10   20.05   11.13
 -11  -1  11   64.60    4.22
 -11  -1  11   60.04    4.29
 -11  -1  11   61.95    8.09
  11   1 -11   75.30    4.61
  11   1 -11  104.33   17.69
 -11  -1  12   69.43    4.38
 -11  -1  12   65.30    4.50
 -11  -1  12   64.96    7.73
 -11  -1  12   55.07    8.33
  11   1 -12   69.26    4.46
  11   1 -12   83.00   13.24
  11   1 -12   85.04   16.91
 -11  -1  13   44.28    3.70
 -11  -1  13   58.20    6.94
 -11  -1  13   55.18    7.43
  11   1 -13   55.02    3.78
  11   1 -13   41.87   12.86
 -11  -1  14    1.36    1.57
  11   1 -14   -2.13    3.46
  11   1 -14    3.95    8.78
 -11   0   1  307.42   15.92
 -11   0   1  299.13   15.63
  11   0  -1  325.68   16.36
  11   0  -1  338.47   17.10
 -11   0   2  204.35   10.73
 -11   0   2  190.13   10.30
  11   0  -2  213.29   10.94
  11   0  -2  201.18   10.87
 -11   0   3  226.25   11.86
 -11   0   3  229.80   11.94
  11   0  -3  220.33   11.65
  11   0  -3  222.11   11.94
 -11   0   4  324.79   17.17
 -11   0   4  327.73   17.22
 -11   0   4  344.97   25.79
 -11   0   4  370.82   26.66
  11   0  -4  369.10   18.37
  11   0  -4  336.46   17.72
  11   0  -4  386.00   28.34
 -11   0   5  158.75    8.98
 -11   0   5  165.12   14.47
 -11   0   5  183.65   15.30
  11   0  -5  183.81    9.64
  11   0  -5  166.75   15.74
  11   0  -5  205.06   21.05
 -11   0   6   10.43    1.28
 -11   0   6    7.79    1.55
 -11   0   6   12.71    2.62
 -11   0   6    9.06    2.95
  11   0  -6    9.75    1.38
  11   0  -6    6.96    1.54
  11   0  -6    8.33    4.10
  11   0  -6   19.33    9.68
 -11   0   7   14.28    1.51
 -11   0   7    9.84    1.85
 -11   0   7   16.61    3.08
  11   0  -7   13.53    1.67
  11   0  -7   11.56    1.76
  11   0  -7    9.75    4.59
  11   0  -7    9.61   10.87
 -11   0   8   38.00    2.95
 -11   0   8   41.61    3.26
 -11   0   8   58.26    6.30
 -11   0   8   51.09    6.62
  11   0  -8   45.59    3.23
  11   0  -8   43.00    3.49
  11   0  -8   41.96    7.54
  11   0  -8   55.47   12.93
 -11   0   9    0.62    0.60
 -11   0   9    0.24    1.05
 -11   0   9    1.41    1.07
 -11   0   9   -1.75    1.74
  11   0  -9   -0.95    0.84
  11   0  -9    0.08    1.11
  11   0  -9   -0.38    3.67
  11   0  -9   12.25   10.19
 -11   0  10    3.97    0.88
 -11   0  10    2.64    1.91
 -11   0  10    2.51    2.53
  11   0 -10    6.90    1.58
  11   0 -10    5.42    4.93
  11   0 -10   -6.53   11.52
 -11   0  11    4.19    0.98
 -11   0  11    4.74    1.43
 -11   0  11    4.13    2.01
 -11   0  11    4.14    2.52
  11   0 -11    5.10    1.27
  11   0 -11    8.12    5.09
  11   0 -11    4.98   12.89
 -11   0  12   34.14    2.63
 -11   0  12   33.10    2.99
 -11   0  12   28.58    4.93
 -11   0  12   25.32    5.61
  11   0 -12   37.82    2.88
  11   0 -12   32.96    8.13
 -11   0  13  147.06    8.30
 -11   0  13  136.79   12.66
 -11   0  13  138.53   13.53
  11   0 -13  139.40    7.83
  11   0 -13  116.48   14.75
  11   0 -13  106.16   18.48
 -11   0  14  156.94   13.54
  11   0 -14  120.32   14.86
  11  -1  -1   58.39    3.48
  11  -1  -1   53.85    3.62
 -11   1   2    8.32    1.03
 -11   1   2    7.46    1.27
  11  -1  -2    9.70    1.18
  11  -1  -2    6.34    1.20
 -11   1   3    3.23    0.72
 -11   1   3    3.78    1.12
  11  -1  -3    2.67    0.98
  11  -1  -3    4.34    1.09
 -11   1   4   20.25    1.77
 -11   1   4   22.06    2.10
 -11   1   4   18.79    3.61
  11  -1  -4   22.76    1.98
  11  -1  -4   23.79    2.17
  11  -1  -4   19.12    4.16
 -11   1   5   30.82    2.38
 -11   1   5   33.98    2.67
 -11   1   5   29.31    4.68
 -11   1   5   32.27    5.09
  11  -1  -5   33.37    2.56
  11  -1  -5   36.59    2.88
  11  -1  -5   29.31    5.28
  11  -1  -5   27.82   13.73
 -11   1   6  147.67    8.25
 -11   1   6  159.89    8.66
 -11   1   6  151.10   13.86
  11  -1  -6  150.96    8.31
  11  -1  -6  156.44    8.82
  11  -1  -6  148.91   14.04
  11  -1  -6  165.81   20.77
 -11   1   7  238.75   12.79
 -11   1   7  252.63   13.25
  11  -1  -7  254.51   13.22
  11  -1  -7  246.67   13.31
  11  -1  -7  253.56   20.60
 -11   1   8   42.52    3.06
 -11   1   8   44.86    3.28
 -11   1   8   39.88    6.35
  11  -1  -8   47.56    3.28
  11  -1  -8   49.30    3.65
  11  -1  -8   42.52    6.68
  11  -1  -8   53.26   15.01
 -11   1   9   59.66    3.97
 -11   1   9   62.24    4.20
 -11   1   9   65.21    8.12
  11  -1  -9   70.34    4.32
  11  -1  -9   61.22    4.50
  11  -1  -9   68.35   15.98
 -11   1  10  115.04    6.77
 -11   1  10  117.81    6.99
  11  -1 -10  117.52    6.86
  11  -1 -10  124.25    7.45
  11  -1 -10  148.98   13.99
 -11   1  11  178.27    9.93
 -11   1  11  183.67   10.18
 -11   1  11  174.77   15.48
 -11   1  11  180.69   16.49
  11  -1 -11  222.43   11.22
 -11   1  12  111.91    6.67
 -11   1  12  117.64    7.03
 -11   1  12  107.65   11.09
 -11   1  12  120.42   12.39
  11  -1 -12  132.71    7.34
  11  -1 -12  132.26   13.82
  11  -1 -12  140.87   21.97
 -11   1  13   47.01    3.37
 -11   1  13   49.49    3.77
 -11   1  13   52.15    6.44
 -11   1  13   47.16    7.24
  11  -1 -13   47.55    3.49
  11  -1 -13   43.37    7.98
  11  -1 -13   33.18   13.15
 -11   1  14   24.74    2.88
 -11   1  14   36.87    5.04
  11  -1 -14   29.13    2.59
  11  -1 -14   21.87    6.68
  11  -1 -14   22.91    9.39
  11  -1 -15    5.97    4.17
  11  -1 -15    0.65    4.92
 -11   2   1  315.72   16.16
 -11   2   1  309.49   15.98
  11  -2  -1  334.12   16.62
  11  -2  -1  335.14   16.88
 -11   2   2  209.43   10.87
 -11   2   2  193.55   10.42
  11  -2  -2  224.76   11.27
  11  -2  -2  199.63   10.81
 -11   2   3   70.94    4.38
 -11   2   3   75.91    4.59
 -11   2   3   72.38    8.03
  11  -2  -3   77.60    4.57
  11  -2  -3   90.95    5.46
  11  -2  -3   81.96    8.33
  11  -2  -3  100.73   12.11
 -11   2   4  199.76   10.67
 -11   2   4  194.37   10.55
 -11   2   4  217.32   17.19
 -11   2   4  199.79   16.57
  11  -2  -4  209.66   10.91
  11  -2  -4  209.25   11.20
 -11   2   5  110.36    6.33
 -11   2   5  107.26   10.88
 -11   2   5  116.35   10.80
  11  -2  -5  108.12    6.53
  11  -2  -5  121.31   11.07
  11  -2  -5  135.20   23.34
 -11   2   6   91.08    5.40
 -11   2   6   83.62    5.28
 -11   2   6   99.75   10.01
  11  -2  -6   96.21    5.54
  11  -2  -6   88.91    5.67
  11  -2  -6   97.49    9.69
  11  -2  -6  135.34   21.70
 -11   2   7  205.35   10.96
 -11   2   7  190.65   10.62
 -11   2   7  216.77   17.28
  11  -2  -7  212.60   11.15
  11  -2  -7  195.52   10.99
  11  -2  -7  220.15   17.62
 -11   2   8  124.99    7.44
 -11   2   8  134.21    7.84
 -11   2   8  154.03   13.88
 -11   2   8  145.57   13.06
  11  -2  -8  144.50    8.03
  11  -2  -8  145.79    8.39
  11  -2  -8  160.85   13.78
  11  -2  -8  221.48   25.49
 -11   2   9    8.92    1.24
 -11   2   9    6.78    1.45
 -11   2   9    9.14    3.12
  11  -2  -9    7.05    1.31
  11  -2  -9    8.43    1.59
  11  -2  -9    8.92   14.54
 -11   2  10    8.58    1.21
 -11   2  10    4.88    1.42
 -11   2  10    5.65    2.56
  11  -2 -10    8.06    1.44
  11  -2 -10    9.07    1.70
  11  -2 -10    7.16    3.27
 -11   2  11    5.18    1.00
 -11   2  11    5.09    2.88
 -11   2  11    3.69    2.21
  11  -2 -11    3.34    1.48
  11  -2 -11    4.33    3.18
  11  -2 -11   -9.53   16.51
 -11   2  12   17.80    1.78
 -11   2  12   17.26    2.23
 -11   2  12   13.68    4.29
 -11   2  12   13.31    3.60
  11  -2 -12   12.46    1.75
  11  -2 -12   16.31    4.49
  11  -2 -12    0.14   16.00
 -11   2  13   11.02    1.40
 -11   2  13    8.92    3.80
 -11   2  13    9.39    3.10
  11  -2 -13    8.89    3.87
  11  -2 -13    1.21   12.10
 -11   2  14   45.30    3.71
 -11   2  14   37.10    6.73
  11  -2 -14   43.31    3.29
  11  -2 -14   35.80    7.32
  11  -2 -14   39.33   11.65
 -11   2  15   35.96    5.20
  11  -2 -15   22.87    5.90
  11  -2 -15    9.81    6.46
  11  -3  -1  183.95    9.33
  11  -3  -1  169.61    9.08
 -11   3   2   95.84    9.57
 -11   3   2  103.46    9.73
  11  -3  -2   98.44    5.46
  11  -3  -2   89.86    5.43
  11  -3  -2  104.65    9.74
  11  -3  -2  111.16   10.72
 -11   3   3   39.71    2.67
 -11   3   3   34.66    2.64
 -11   3   3   43.69    5.41
  11  -3  -3   40.69    2.69
  11  -3  -3   36.16    2.80
  11  -3  -3   44.06    5.41
 -11   3   4    5.44    0.88
 -11   3   4    4.30    1.14
 -11   3   4    8.64    2.19
 -11   3   4    7.57    1.98
  11  -3  -4    4.27    0.94
  11  -3  -4    3.75    1.17
  11  -3  -4    7.14    2.01
  11  -3  -4    6.23   17.22
 -11   3   5   42.84    2.96
 -11   3   5   38.05    2.98
 -11   3   5   55.23    6.36
 -11   3   5   46.81    5.87
  11  -3  -5   43.07    3.00
  11  -3  -5   38.97    3.18
  11  -3  -5   55.01    6.05
  11  -3  -5   57.49   21.80
 -11   3   6   15.76    1.61
 -11   3   6   15.67    1.88
 -11   3   6   21.22    3.95
 -11   3   6   19.62    3.53
  11  -3  -6   16.60    1.72
  11  -3  -6   15.86    1.90
  11  -3  -6   23.03    3.66
  11  -3  -6   21.76   20.45
 -11   3   7    0.68    0.59
 -11   3   7    1.84    1.09
 -11   3   7    1.06    1.18
  11  -3  -7    1.34    0.76
  11  -3  -7    1.13    1.43
  11  -3  -7  -24.80   16.00
 -11   3   8   76.66    4.93
 -11   3   8   88.05    5.48
 -11   3   8   86.91    9.80
 -11   3   8   96.03    9.39
  11  -3  -8   95.51    5.53
  11  -3  -8   86.78    5.60
  11  -3  -8   92.70    9.44
  11  -3  -8  114.67   22.65
 -11   3   9  100.25    6.04
 -11   3   9  102.06    6.29
 -11   3   9  108.87   11.34
  11  -3  -9  107.65    6.32
  11  -3  -9  118.45    6.97
  11  -3  -9  181.98   25.64
 -11   3  10  106.26    6.34
 -11   3  10  107.49    6.58
 -11   3  10  114.99   11.03
  11  -3 -10  113.47    6.59
  11  -3 -10  112.61    6.95
  11  -3 -10  120.76   11.47
 -11   3  11   48.69    3.49
 -11   3  11   48.84    3.82
 -11   3  11   54.04    7.60
 -11   3  11   56.09    6.89
  11  -3 -11   51.72    3.65
  11  -3 -11   60.59    4.31
  11  -3 -11   58.12    7.32
  11  -3 -11   50.52   19.78
 -11   3  12   20.90    2.47
 -11   3  12   23.03    5.18
 -11   3  12   23.40    4.56
  11  -3 -12   27.76    2.41
  11  -3 -12   31.85    5.34
  11  -3 -12    9.85   19.67
 -11   3  13  159.68   15.16
 -11   3  13  157.62   14.04
  11  -3 -13  150.34    8.54
  11  -3 -13  148.85   14.23
  11  -3 -13  123.32   23.76
 -11   3  14  119.16    7.30
 -11   3  14  102.41   11.94
  11  -3 -14  123.59    7.07
  11  -3 -14   66.08   17.11
 -11   3  15   24.87    4.85
  11  -3 -15   26.02    5.23
  11  -3 -15   18.24    8.23
 -11   4   1   34.36    5.15
 -11   4   2    0.54    0.66
 -11   4   2    0.60    0.83
 -11   4   2   -0.15    0.96
  11  -4  -2    1.04    0.46
  11  -4  -2    0.28    0.65
  11  -4  -2    1.00    0.83
  11  -4  -2   -1.47    4.74
 -11   4   3   12.00    1.15
 -11   4   3   11.04    1.39
 -11   4   3    9.10    2.78
 -11   4   3   13.24    2.82
  11  -4  -3   11.88    1.22
  11  -4  -3   12.03    1.42
  11  -4  -3   13.13    2.75
  11  -4  -3    6.00   10.85
 -11   4   4  208.81   11.23
 -11   4   4  214.04   11.51
 -11   4   4  205.67   17.73
 -11   4   4  233.19   18.24
  11  -4  -4  226.53   11.71
  11  -4  -4  229.35   12.06
  11  -4  -4  242.60   18.38
  11  -4  -4  339.02   35.95
 -11   4   5  209.25   11.20
 -11   4   5  218.87   11.65
 -11   4   5  214.27   17.96
  11  -4  -5  222.22   11.56
  11  -4  -5  224.21   11.92
  11  -4  -5  365.22   44.85
 -11   4   6   95.51    5.69
 -11   4   6   94.54    5.89
 -11   4   6  105.79   10.63
 -11   4   6  102.18   10.14
  11  -4  -6  110.35    6.16
  11  -4  -6  105.51    6.30
  11  -4  -6  114.66   10.36
  11  -4  -6  188.14   32.56
 -11   4   7  216.75   11.98
 -11   4   7  229.65   12.55
 -11   4   7  249.29   20.12
 -11   4   7  247.37   19.43
  11  -4  -7  241.85   12.70
  11  -4  -7  245.77   13.12
  11  -4  -7  263.02   19.78
  11  -4  -7  325.16   38.32
 -11   4   8  157.90    8.81
 -11   4   8  150.81    8.86
 -11   4   8  178.55   15.48
 -11   4   8  176.25   14.65
  11  -4  -8  164.31    9.02
  11  -4  -8  152.09    8.98
  11  -4  -8  181.37   14.77
  11  -4  -8  256.36   33.46
 -11   4   9   32.68    2.54
 -11   4   9   24.95    2.68
 -11   4   9   41.82    5.97
  11  -4  -9   33.73    2.70
  11  -4  -9   34.35    2.99
  11  -4  -9   37.51    5.22
  11  -4  -9   58.08   22.40
 -11   4  10  114.34    6.61
 -11   4  10   99.31    6.42
 -11   4  10  119.18   11.03
  11  -4 -10  112.36    6.54
  11  -4 -10  107.34    6.65
  11  -4 -10  113.83   10.96
 -11   4  11   21.74    2.07
 -11   4  11   18.88    2.39
 -11   4  11   27.21    5.17
 -11   4  11   27.77    4.40
  11  -4 -11   22.52    2.18
  11  -4 -11   22.06    2.63
  11  -4 -11   29.82    4.70
  11  -4 -11   19.15   20.47
 -11   4  12   10.19    1.36
 -11   4  12    7.67    1.72
 -11   4  12   12.25    4.02
 -11   4  12    8.44    2.82
  11  -4 -12    8.49    1.45
  11  -4 -12   10.25    3.15
  11  -4 -12   26.54   19.53
 -11   4  13    9.07    1.36
 -11   4  13   10.16    1.93
 -11   4  13   13.55    4.18
 -11   4  13   10.35    3.08
  11  -4 -13   12.84    1.72
  11  -4 -13   14.03    3.59
  11  -4 -13    3.91   17.08
 -11   4  14   11.06    1.57
 -11   4  14   11.13    2.05
 -11   4  14   17.56    4.44
 -11   4  14   11.77    3.41
  11  -4 -14   13.01    1.84
  11  -4 -14   15.57   11.35
 -11   4  15   -0.19    1.37
 -11   4  15   -0.12    1.70
  11  -4 -15    0.61    1.21
  11  -4 -15    1.81    2.32
  11  -4 -15   -4.14    5.76
 -11   5   1  201.03   17.08
 -11   5   1  209.84   18.37
  11  -5  -1  222.80   17.73
  11  -5  -1  238.16   19.76
  11  -5  -2  246.17   19.90
  11  -5  -2  282.66   24.57
 -11   5   3   55.76    3.31
 -11   5   3   50.05    3.40
 -11   5   3   60.20    6.98
 -11   5   3   62.14    7.29
  11  -5  -3   58.26    3.45
  11  -5  -3   53.84    3.43
  11  -5  -3   71.18    7.11
  11  -5  -3   72.50   16.47
 -11   5   4   70.95    4.30
 -11   5   4   86.57    8.75
  11  -5  -4   72.53    4.56
  11  -5  -4   82.15    4.89
  11  -5  -4   87.20    8.53
  11  -5  -4  147.77   29.81
 -11   5   5  314.44   16.71
 -11   5   5  310.24   24.79
 -11   5   5  338.56   25.34
  11  -5  -5  327.08   16.81
  11  -5  -5  360.41   25.69
  11  -5  -5  512.39   54.10
 -11   5   6  115.24    6.49
 -11   5   6  106.49    6.58
 -11   5   6  115.67   11.17
  11  -5  -6  118.79    6.68
  11  -5  -6  112.66    6.76
  11  -5  -6  141.14   11.61
  11  -5  -6  178.87   39.93
 -11   5   7    1.74    0.68
 -11   5   7    1.41    1.10
 -11   5   7    1.82    1.86
 -11   5   7    1.67    1.32
  11  -5  -7    0.59    1.05
  11  -5  -7    1.53    1.32
  11  -5  -7  -20.04   29.32
 -11   5   8    0.00    0.54
 -11   5   8   -0.10    1.06
 -11   5   8    2.11    2.01
 -11   5   8   -0.29    1.03
  11  -5  -8    1.00    0.84
  11  -5  -8    0.52    1.00
  11  -5  -8  -25.80   23.83
 -11   5   9    2.53    0.79
 -11   5   9    3.89    1.32
 -11   5   9    3.68    2.53
 -11   5   9    2.44    1.56
  11  -5  -9    1.27    1.01
  11  -5  -9    2.51    1.28
  11  -5  -9    2.65    1.65
  11  -5  -9   18.03   21.16
 -11   5  10   23.94    2.13
 -11   5  10   24.32    2.60
 -11   5  10   25.91    5.15
 -11   5  10   29.09    4.43
  11  -5 -10   20.75    2.19
  11  -5 -10   26.68    2.70
  11  -5 -10   25.09    4.33
  11  -5 -10   30.31   23.66
 -11   5  11   23.24    2.12
 -11   5  11   22.45    2.62
 -11   5  11   20.00    4.88
 -11   5  11   23.61    4.22
  11  -5 -11   21.34    2.18
  11  -5 -11   25.08    2.62
  11  -5 -11   21.33    4.27
  11  -5 -11   38.53   25.04
 -11   5  12   65.64    4.51
 -11   5  12   91.13   10.22
 -11   5  12   80.44    8.68
  11  -5 -12   83.76    5.54
  11  -5 -12   83.42    8.89
  11  -5 -12   80.64   25.35
 -11   5  13   77.57    5.16
 -11   5  13   85.94    5.94
 -11   5  13   98.36   11.09
 -11   5  13   95.14    9.67
  11  -5 -13   91.91    5.73
  11  -5 -13  106.53   10.19
  11  -5 -13  116.68   26.84
 -11   5  14  114.46    6.76
 -11   5  14  106.02    7.25
 -11   5  14  136.63   13.28
  11  -5 -14   87.89   19.71
 -11   5  15  130.05    8.24
  11  -5 -15  150.08    8.64
 -11   6   1   37.27    5.19
 -11   6   1   29.13    7.71
  11  -6  -1   35.16    5.41
  11  -6  -1   39.54    8.35
 -11   6   2   11.04    2.73
 -11   6   2   11.37    4.53
  11  -6  -2    9.36    2.84
  11  -6  -2   10.72    8.69
 -11   6   3    3.76    1.79
 -11   6   3    2.37    3.04
  11  -6  -3    4.66    1.90
  11  -6  -3   12.66   14.21
 -11   6   4   48.49    3.02
 -11   6   4   54.64    3.56
 -11   6   4   49.64    6.60
 -11   6   4   53.72    7.19
  11  -6  -4   58.28    6.62
  11  -6  -4   64.27   25.94
 -11   6   5    7.33    0.98
 -11   6   5    7.65    1.39
 -11   6   5    8.87    2.84
 -11   6   5   12.26    3.09
  11  -6  -5    8.77    1.44
  11  -6  -5   12.06    2.59
  11  -6  -5   73.72   32.28
 -11   6   6   22.79    1.90
 -11   6   6   24.47    2.46
 -11   6   6   24.43    4.67
 -11   6   6   25.53    4.49
  11  -6  -6   25.76    2.14
  11  -6  -6   22.96    2.32
  11  -6  -6   26.69    4.23
  11  -6  -6   42.98   37.03
 -11   6   7  126.79    7.29
 -11   6   7  134.61    7.99
 -11   6   7  141.50   13.27
 -11   6   7  157.28   13.29
  11  -6  -7  127.92    7.47
  11  -6  -7  138.62    8.00
  11  -6  -7  155.20   12.95
  11  -6  -7  228.18   41.40
 -11   6   8  126.59    7.12
 -11   6   8  120.47    7.45
 -11   6   8  132.88   12.75
  11  -6  -8  126.60    7.29
  11  -6  -8  131.56    7.64
  11  -6  -8  236.71   42.49
 -11   6   9   71.36    4.59
 -11   6   9   70.04    5.09
 -11   6   9   79.87    9.33
 -11   6   9   81.36    8.63
  11  -6  -9   73.58    4.80
  11  -6  -9   80.57    5.26
  11  -6  -9   90.88    8.74
  11  -6  -9  115.49   32.00
 -11   6  10   66.17    4.48
 -11   6  10   89.75    9.71
 -11   6  10   82.56    8.67
  11  -6 -10   72.45    5.12
  11  -6 -10   86.89    8.64
  11  -6 -10   78.18   31.80
 -11   6  11  109.70    6.63
 -11   6  11  117.23    7.43
 -11   6  11  128.71   12.73
 -11   6  11  119.95   11.49
  11  -6 -11  117.69    7.00
  11  -6 -11  128.21   11.62
  11  -6 -11  149.08   32.76
 -11   6  12   88.43    5.71
 -11   6  12   94.77    6.51
 -11   6  12  125.42   12.30
 -11   6  12  104.44   10.44
  11  -6 -12  102.48    6.31
  11  -6 -12  111.01    6.84
  11  -6 -12  118.42   10.77
  11  -6 -12  135.93   27.25
 -11   6  13   70.10    5.36
 -11   6  13   91.60   10.33
 -11   6  13   74.20    8.49
  11  -6 -13   69.31    4.86
  11  -6 -13   88.17    8.91
  11  -6 -13   69.42   24.64
 -11   6  14   34.03    2.74
 -11   6  14   27.20    3.38
 -11   6  14   41.09    6.83
  11  -6 -14   36.80    3.13
  11  -6 -14   34.09    5.60
  11  -6 -14   30.13   15.38
 -11   6  15    0.60    1.33
  11  -6 -15    0.07    1.19
  11  -6 -15    0.88    2.21
  11  -6 -15   -6.40    3.41
 -11   7   1   70.28    7.83
 -11   7   1   72.17   13.33
  11  -7  -1   65.34    8.08
  11  -7  -1   80.80   12.60
 -11   7   2  179.96   16.02
 -11   7   2  190.55   19.23
  11  -7  -2  211.86   17.05
  11  -7  -2  237.47   25.51
 -11   7   3  134.34   13.05
 -11   7   3  152.58   15.44
  11  -7  -3  162.59   13.79
  11  -7  -3  199.53   27.55
 -11   7   4   84.24    9.31
 -11   7   4   82.60   10.52
  11  -7  -4  100.03    9.60
  11  -7  -4  142.04   31.62
 -11   7   5   49.48    3.08
 -11   7   5   49.26    3.57
 -11   7   5   60.07    7.02
 -11   7   5   62.69    7.78
  11  -7  -5   55.32    3.41
  11  -7  -5   42.27    3.16
  11  -7  -5   69.14    6.98
  11  -7  -5   96.84   36.72
 -11   7   6   57.79    3.69
 -11   7   6   54.58    4.14
 -11   7   6   71.17    8.03
 -11   7   6   70.03    8.30
  11  -7  -6   65.34    4.10
  11  -7  -6   64.82    4.33
  11  -7  -6   78.72    7.79
  11  -7  -6  133.48   43.07
 -11   7   7   74.58    4.49
 -11   7   7   65.31    4.85
 -11   7   7   88.46    9.15
  11  -7  -7   80.50    4.88
  11  -7  -7   71.01    4.77
  11  -7  -7  185.89   48.22
 -11   7   8  122.18    7.12
 -11   7   8  144.22   13.37
 -11   7   8  132.19   12.65
  11  -7  -8  129.92    7.75
  11  -7  -8  151.00   12.73
  11  -7  -8  294.70   51.59
 -11   7   9   28.86    2.36
 -11   7   9   23.13    2.85
 -11   7   9   33.75    5.09
  11  -7  -9   30.47    2.66
  11  -7  -9   29.06    2.90
  11  -7  -9   39.22    5.00
  11  -7  -9  106.01   42.18
 -11   7  10    1.88    0.78
 -11   7  10    1.26    1.37
 -11   7  10    2.94    2.36
 -11   7  10    1.44    1.39
  11  -7 -10    1.05    1.07
  11  -7 -10    0.36    1.31
  11  -7 -10    1.24    1.46
  11  -7 -10  -17.12   32.52
 -11   7  11    3.69    0.99
 -11   7  11    1.58    1.66
 -11   7  11    7.64    3.09
  11  -7 -11    5.57    1.35
  11  -7 -11    2.05    1.56
  11  -7 -11   41.72   29.15
 -11   7  12    2.46    0.87
 -11   7  12   -0.90    1.47
 -11   7  12    2.17    2.65
 -11   7  12    0.17    1.27
  11  -7 -12    1.04    1.08
  11  -7 -12    0.14    1.28
  11  -7 -12    0.53    1.46
 -11   7  13   47.35    3.59
 -11   7  13   60.84    4.83
 -11   7  13   57.74    8.40
 -11   7  13   55.31    6.98
  11  -7 -13   56.86    4.13
  11  -7 -13   61.58    7.15
  11  -7 -13   51.59   23.58
 -11   7  14   68.64    4.63
 -11   7  14   75.35    5.75
 -11   7  14   85.42   10.62
 -11   7  14   79.88    8.62
  11  -7 -14   77.99    5.28
 -11   7  15   32.73    3.75
  11  -7 -15   56.21    4.14
 -11   8   1   46.67    6.04
 -11   8   1   43.65   14.80
  11  -8  -1   39.98    6.57
  11  -8  -1   55.18   11.71
 -11   8   2   84.99    9.09
 -11   8   2   73.43   14.04
  11  -8  -2   87.55    9.51
  11  -8  -2  120.71   18.40
 -11   8   3   57.74    7.20
 -11   8   3   59.23   10.71
  11  -8  -3   61.38    7.51
  11  -8  -3   95.51   20.75
 -11   8   4   10.62    2.93
 -11   8   4   11.61    5.69
  11  -8  -4   10.39    3.00
  11  -8  -4   22.44   24.16
 -11   8   5   19.02    3.84
 -11   8   5   11.80    5.25
  11  -8  -5   -2.40   32.66
 -11   8   6   22.07    1.73
 -11   8   6   16.02    2.34
 -11   8   6   28.22    4.61
 -11   8   6   25.05    5.41
  11  -8  -6   28.78    4.32
  11  -8  -6   65.34   41.06
 -11   8   7    9.86    1.94
 -11   8   7    6.87    2.88
 -11   8   7    3.95    3.32
  11  -8  -7    5.72    1.21
  11  -8  -7    7.48    2.40
  11  -8  -7   36.91   47.84
 -11   8   8   21.44    1.93
 -11   8   8   25.88    2.94
 -11   8   8   25.77    4.94
  11  -8  -8   24.03    2.33
  11  -8  -8   28.44    2.72
  11  -8  -8   32.08    4.54
  11  -8  -8   47.56   43.82
 -11   8   9   63.92    4.25
 -11   8   9   66.72    5.24
 -11   8   9   73.90    8.95
 -11   8   9   84.17    8.84
  11  -8  -9   72.10    4.87
  11  -8  -9   75.67    5.13
  11  -8  -9   85.28    8.44
  11  -8  -9  120.29   44.40
 -11   8  10  155.21    8.69
 -11   8  10  142.54    9.26
 -11   8  10  171.77   15.48
 -11   8  10  175.53   14.85
  11  -8 -10  155.05    8.99
  11  -8 -10  148.70    8.99
  11  -8 -10  181.54   14.61
  11  -8 -10  271.57   49.95
 -11   8  11  145.08    8.51
 -11   8  11  146.46    9.60
 -11   8  11  179.61   15.98
 -11   8  11  158.13   14.43
  11  -8 -11  177.08    9.73
  11  -8 -11  164.46    9.61
  11  -8 -11  188.44   14.95
  11  -8 -11  242.56   42.64
 -11   8  12   49.19    3.59
 -11   8  12   51.54    4.76
 -11   8  12   61.74    8.31
 -11   8  12   54.84    6.98
  11  -8 -12   53.51    4.06
  11  -8 -12   54.56    4.32
  11  -8 -12   63.12    7.06
  11  -8 -12   66.69   31.53
 -11   8  13   71.91    4.92
 -11   8  13   83.12    6.26
 -11   8  13  102.71   11.19
 -11   8  13   88.22    9.25
  11  -8 -13   83.79    5.64
  11  -8 -13   85.19    5.72
  11  -8 -13   95.61    9.35
  11  -8 -13   68.54   20.18
 -11   8  14  110.51    6.65
 -11   8  14   87.53    6.94
  11  -8 -14  116.69    7.23
  11  -8 -14  145.12   11.95
 -11   9   1   30.97    4.84
 -11   9   1   19.45   15.80
  11  -9  -1   27.55    5.76
  11  -9  -1   43.06   11.36
 -11   9   2   61.31    7.47
 -11   9   2   37.96   14.63
  11  -9  -2   69.26    8.28
  11  -9  -2  126.25   20.74
 -11   9   3   15.85    3.49
 -11   9   3   12.36    9.01
  11  -9  -3   17.35    4.04
  11  -9  -3   30.62   19.10
 -11   9   4   19.33    3.83
 -11   9   4    9.69    7.08
  11  -9  -4   17.35    4.11
  11  -9  -4   22.36   26.57
 -11   9   5   63.77    7.90
 -11   9   5   62.78   10.48
  11  -9  -5   70.97    8.07
  11  -9  -5   93.37   36.37
 -11   9   6   65.46   10.25
  11  -9  -6   79.68    8.61
 -11   9   7  133.95    7.37
  11  -9  -7  125.96    7.56
  11  -9  -7  163.10   13.37
  11  -9  -7  271.88   59.18
 -11   9   8  166.19    9.42
 -11   9   8  185.14   10.88
 -11   9   8  197.70   16.95
 -11   9   8  198.60   17.40
  11  -9  -8  193.98   10.52
  11  -9  -8  181.38   10.34
  11  -9  -8  220.54   16.84
  11  -9  -8  299.06   62.67
 -11   9   9   71.76    9.01
 -11   9   9   80.35    9.41
  11  -9  -9   67.73    4.96
  11  -9  -9   81.55    8.48
  11  -9  -9   95.31   48.11
 -11   9  10   32.74    2.62
 -11   9  10   21.58    3.12
 -11   9  10   43.87    6.19
 -11   9  10   35.10    5.58
  11  -9 -10   30.93    2.94
  11  -9 -10   24.65    2.95
  11  -9 -10   45.16    5.32
  11  -9 -10   60.09   44.04
 -11   9  11   22.91    2.16
 -11   9  11   28.30    4.81
  11  -9 -11   19.93    2.71
  11  -9 -11   30.88    4.56
 -11   9  12    9.72    1.44
 -11   9  12    5.17    2.29
 -11   9  12   11.71    3.98
 -11   9  12   13.77    3.16
  11  -9 -12   10.07    1.98
  11  -9 -12    5.54    1.82
  11  -9 -12   13.35    2.95
  11  -9 -12   -6.40   27.75
 -11   9  13    0.59    0.83
 -11   9  13    0.50    2.87
  11  -9 -13    2.17    1.73
  11  -9 -13   -6.89    9.94
 -11   9  14    1.25    0.87
 -11   9  14    0.21    1.79
  11  -9 -14    1.82    2.08
  11  -9 -14    3.08    6.31
 -11  10   1   66.76    7.35
 -11  10   1   41.39   18.79
  11 -10  -1   49.48    8.05
  11 -10  -1   50.08   12.38
 -11  10   2   75.68    8.52
 -11  10   2   57.90   18.07
  11 -10  -2   80.03    9.51
  11 -10  -2  117.03   20.94
 -11  10   3   40.52    5.81
 -11  10   3   32.22   13.96
  11 -10  -3   41.42    6.42
  11 -10  -3   36.30   18.09
 -11  10   4   49.16    6.62
 -11  10   4   45.39   11.76
  11 -10  -4   52.70    7.08
  11 -10  -4   66.89   26.81
 -11  10   5   91.99   10.09
 -11  10   5  105.54   14.78
  11 -10  -5  105.15   10.57
  11 -10  -5  110.75   37.40
 -11  10   6   62.44    7.86
 -11  10   6   64.72   11.17
  11 -10  -6   67.86    7.97
  11 -10  -6   82.78   42.92
 -11  10   7   10.10    2.52
 -11  10   7   21.20    4.15
 -11  10   7   19.50    6.44
  11 -10  -7   20.88    3.95
  11 -10  -7   68.72   50.48
 -11  10   8    6.61    1.06
 -11  10   8   10.71    3.06
 -11  10   8    7.77    2.99
 -11  10   8    9.28    4.11
  11 -10  -8   93.93   47.47
 -11  10   9   10.41    1.37
 -11  10   9    8.71    2.83
 -11  10   9   10.89    3.87
 -11  10   9   10.31    4.26
  11 -10  -9   13.62    3.11
  11 -10  -9   54.92   45.74
 -11  10  10   31.01    3.90
 -11  10  10   42.81    6.87
  11 -10 -10   43.72    5.81
 -11  10  11   37.85    6.88
 -11  10  11   38.78    6.33
  11 -10 -11   51.76    6.24
  11 -10 -11   39.10   30.14
 -11  10  12   14.56    4.51
 -11  10  12   10.69    3.32
  11 -10 -12   22.66   15.94
  11 -10 -13   67.48    8.02
 -11  11   1   24.82    4.38
 -11  11   1   10.19   14.65
  11 -11  -1   25.10    5.96
  11 -11  -1   21.92    7.98
 -11  11   2   13.90    3.33
  11 -11  -2   15.88   10.23
 -11  11   3    6.31    2.40
  11 -11  -3   28.59   15.39
 -11  11   4    0.21    1.14
 -11  11   4    3.14    9.81
  11 -11  -4  -11.04   20.21
 -11  11   5   11.97    3.22
  11 -11  -5   64.66   33.09
 -11  11   6   33.05    5.20
  11 -11  -6   26.60    5.31
  11 -11  -6   39.30   37.04
 -11  11   7  105.42   11.37
 -11  11   7  100.11   13.30
  11 -11  -7  134.35   11.93
  11 -11  -7  101.85   44.89
  11 -11  -8   86.39    9.40
  11 -11  -9   57.80    7.20
  11 -11  -9   31.34   34.25
  11 -11 -11   31.60   18.30
  11 -12  -1   20.09    5.63
  11 -12  -1   10.31    6.53
  11 -12  -3   61.16    8.46
  11 -12  -3   51.71   13.69
 -11  12   4   34.54   12.48
  11 -12  -4   50.42    7.32
  11 -12  -4   35.19   15.15
 -11  12   5   26.80   10.25
 -11  12   6   47.20    6.30
 -11  12   6   46.83    9.95
  11 -12  -6   35.09    6.34
  11 -12  -6   49.76   25.01
  11 -12  -7   31.96    5.49
  11 -12  -7   17.73   19.18
  11 -12  -8   45.79    6.56
  11 -12  -8   41.10   18.47
  11 -12 -10    1.77    2.01
  11 -12 -10    9.33   13.83
  11 -13  -5   -1.49    5.93
  11 -13  -6   -3.47    6.63
 -10 -18   1   79.12    9.61
  10  18  -1   19.06    9.77
  10  17  -1    0.40    1.34
 -10 -17   2   -0.49    3.43
  10  17  -2    1.84    7.63
 -10 -16   1   85.61    5.44
 -10 -16   1   92.13   10.90
  10  16  -1   90.46    5.48
  10  16  -1   93.96   38.11
 -10 -16   2   71.79   10.04
  10  16  -2   41.70   33.60
  10  16  -2   76.32    8.50
 -10 -16   3   44.71    7.52
  10  16  -3    5.02   15.46
  10  16  -3   35.05    5.45
 -10 -16   4   42.46    6.57
  10  16  -4   -3.94    6.45
 -10 -15   1   32.06    2.77
 -10 -15   1   39.51    6.96
 -10 -15   1   40.07    6.23
  10  15  -1   36.04    2.74
  10  15  -1    9.12   38.18
  10  15  -1   37.24    5.46
 -10 -15   2   44.37    3.30
 -10 -15   2   40.72    7.29
  10  15  -2   46.04    3.22
  10  15  -2    5.65   36.20
  10  15  -2   38.76    5.92
 -10 -15   3   17.87    5.03
  10  15  -3   41.85   31.79
  10  15  -3   16.18    3.61
 -10 -15   4    1.46    3.60
  10  15  -4    0.85    1.25
 -10 -15   5    2.94    3.46
  10  15  -5    1.65    7.30
 -10 -14   1   26.54    2.44
 -10 -14   1   24.14    5.73
  10  14  -1   30.69    2.44
  10  14  -1   56.88   35.58
 -10 -14   2   41.25    3.16
 -10 -14   2   38.58    6.93
 -10 -14   2   37.02    6.13
  10  14  -2   46.70    3.20
  10  14  -2   38.03   40.75
  10  14  -2   44.11    5.96
 -10 -14   3    8.75    1.49
 -10 -14   3    8.47    3.04
  10  14  -3   10.45    1.45
  10  14  -3   11.74    2.86
 -10 -14   4   45.52    7.46
  10  14  -4   12.39   29.00
 -10 -14   5   84.32   10.21
  10  14  -5   44.46   28.78
  10  14  -5   76.08    8.60
 -10 -14   6   71.77    9.52
  10  14  -6   59.45   21.87
 -10 -13   1  170.80    9.46
 -10 -13   1  168.63    9.35
 -10 -13   1  163.32   15.77
 -10 -13   1  183.98   15.70
  10  13  -1  181.25    9.60
  10  13  -1   96.37   40.34
  10  13  -1  169.16   14.95
 -10 -13   2  209.79   11.36
 -10 -13   2  209.23   18.54
 -10 -13   2  224.35   18.24
  10  13  -2  224.82   11.68
  10  13  -2  204.66   49.44
  10  13  -2  199.26   17.31
 -10 -13   3  109.66    6.52
 -10 -13   3  113.46   11.88
 -10 -13   3  109.38   11.02
  10  13  -3  116.35    6.64
  10  13  -3   90.46   41.86
  10  13  -3  109.42   10.88
 -10 -13   4   18.49    1.98
 -10 -13   4   19.85    5.11
 -10 -13   4   15.75    3.71
  10  13  -4   18.42    1.91
  10  13  -4   44.70   38.64
  10  13  -4   16.21    3.62
 -10 -13   5   31.27    2.78
 -10 -13   5   30.51    6.44
  10  13  -5   39.34    2.96
  10  13  -5  -28.07   41.23
  10  13  -5   35.23    5.28
 -10 -13   6   49.48    7.57
  10  13  -6   23.69   28.11
  10  13  -6   37.66    5.72
 -10 -13   7    6.58    4.13
  10  13  -7   -0.93   14.93
  10  13  -7    8.90    2.70
 -10 -12   1   32.42    2.60
 -10 -12   1   34.87    2.76
 -10 -12   1   39.81    6.20
 -10 -12   1   38.18    5.64
  10  12  -1   36.76    2.70
  10  12  -1   36.11   30.53
  10  12  -1   34.05    5.25
 -10 -12   2    1.14    0.94
 -10 -12   2    1.89    2.76
 -10 -12   2    2.19    1.73
  10  12  -2    1.56    0.85
  10  12  -2  -17.37   32.75
  10  12  -2    0.15    1.22
 -10 -12   3   11.41    1.40
 -10 -12   3   10.94    1.58
 -10 -12   3    7.32    3.96
 -10 -12   3   10.65    3.02
  10  12  -3   10.72    1.46
  10  12  -3   12.47    3.06
 -10 -12   4   51.52    8.08
  10  12  -4   13.52   35.97
  10  12  -4   64.62    7.46
 -10 -12   5   30.09    2.62
 -10 -12   5   26.68    6.07
 -10 -12   5   32.84    4.97
  10  12  -5   32.00    2.62
  10  12  -5   39.09   40.52
  10  12  -5   33.84    5.06
 -10 -12   6   24.03    2.44
 -10 -12   6   22.29    5.90
  10  12  -6   29.70    2.54
  10  12  -6   63.93   43.72
  10  12  -6   31.44    4.79
 -10 -12   7   39.78    7.34
  10  12  -7   35.22   30.28
  10  12  -7   45.14    6.18
 -10 -12   8   74.38    9.45
 -10 -11   1  101.44    5.89
 -10 -11   1   96.06    5.76
  10  11  -1   96.91    5.67
  10  11  -1  107.88    6.47
  10  11  -1  133.70   34.52
  10  11  -1   88.86    9.65
 -10 -11   2  381.25   19.68
 -10 -11   2  388.42   29.45
 -10 -11   2  382.65   28.64
  10  11  -2  373.12   19.88
  10  11  -2  405.32   51.72
  10  11  -2  403.40   29.08
 -10 -11   3  280.57   15.16
 -10 -11   3  292.20   15.42
 -10 -11   3  332.21   25.00
 -10 -11   3  308.66   23.49
  10  11  -3  292.36   15.35
  10  11  -3  337.62   53.83
  10  11  -3  317.97   23.72
 -10 -11   4   65.29    4.16
 -10 -11   4   57.61    3.96
 -10 -11   4   63.41    7.46
  10  11  -4   69.10    4.29
 -10 -11   5   32.51    2.59
 -10 -11   5   34.80    2.90
 -10 -11   5   37.12    6.38
  10  11  -5   36.76    2.82
  10  11  -5   89.68   44.41
 -10 -11   6   53.38    3.71
 -10 -11   6   51.06    7.66
 -10 -11   6   56.38    6.77
  10  11  -6   60.44    3.92
  10  11  -6   77.93   47.35
  10  11  -6   48.45    6.72
 -10 -11   7   74.49    4.76
 -10 -11   7   87.73    9.57
  10  11  -7   74.80    4.72
  10  11  -7   73.03   50.74
  10  11  -7   61.96    8.08
 -10 -11   8   50.01    7.53
  10  11  -8   41.76   29.42
  10  11  -8   46.83    6.53
 -10 -11   9    3.61    2.86
  10  11  -9    3.28    8.34
  10  11  -9    1.15    1.79
 -10 -10   1   67.09    4.29
 -10 -10   1   64.82    4.23
 -10 -10   1   84.84    8.80
 -10 -10   1   70.92    7.90
  10  10  -1   65.24    4.14
  10  10  -1   64.35    4.55
  10  10  -1  107.29   28.02
  10  10  -1   69.89    7.76
 -10 -10   2   12.34    1.39
 -10 -10   2   12.41    1.57
 -10 -10   2   13.61    3.84
  10  10  -2   10.27    1.32
  10  10  -2    8.16    1.54
  10  10  -2    2.46   26.02
  10  10  -2   10.43    2.77
 -10 -10   3   21.84    1.94
 -10 -10   3   24.87    5.01
  10  10  -3   19.58    2.32
  10  10  -3   -5.15   29.27
 -10 -10   4   12.40    1.41
 -10 -10   4   12.20    1.61
 -10 -10   4   11.70    3.99
 -10 -10   4   11.36    2.96
  10  10  -4   12.88    1.57
  10  10  -4    9.73   32.44
  10  10  -4   13.23    3.05
 -10 -10   5   12.95    1.41
 -10 -10   5    9.60    1.58
 -10 -10   5    9.82    2.81
  10  10  -5   11.35    1.54
 -10 -10   6    0.31    0.48
 -10 -10   6    0.52    1.03
 -10 -10   6    1.44    2.29
 -10 -10   6    0.24    1.16
  10  10  -6    0.70    0.90
  10  10  -6   45.22   40.66
 -10 -10   7    8.44    1.51
 -10 -10   7   10.94    3.72
 -10 -10   7   12.67    2.84
  10  10  -7   12.93    1.63
  10  10  -7  -12.00   36.42
  10  10  -7    8.65    2.90
 -10 -10   8   62.61    4.28
 -10 -10   8   68.56    8.75
  10  10  -8   74.40    4.66
  10  10  -8  104.14   46.28
  10  10  -8   69.82    8.18
 -10 -10   9   96.16   10.34
  10  10  -9   64.42   29.21
  10  10  -9   79.61    9.33
 -10 -10  10   50.94    7.47
 -10  -9   1   63.54    3.98
 -10  -9   1   58.56    3.80
 -10  -9   1   52.72    7.35
 -10  -9   1   56.43    6.91
  10   9  -1   54.61    3.62
  10   9  -1   57.67    4.11
  10   9  -1   52.02   22.28
  10   9  -1   60.08    6.93
 -10  -9   2  111.98   11.04
 -10  -9   2   96.16   10.03
  10   9  -2   85.68   28.66
  10   9  -2  109.16   10.32
 -10  -9   3   44.61    3.03
 -10  -9   3   39.77    2.91
 -10  -9   3   32.68    5.35
  10   9  -3   39.17    2.80
  10   9  -3   40.06    3.31
  10   9  -3   -0.84   28.64
  10   9  -3   37.29    5.40
 -10  -9   4   33.08    2.52
 -10  -9   4   31.36    2.61
 -10  -9   4   30.52    5.61
 -10  -9   4   32.09    4.97
  10   9  -4   36.17    2.68
  10   9  -4   32.71    2.99
  10   9  -4   20.05   32.20
 -10  -9   5  101.38    5.93
 -10  -9   5   92.14    5.66
 -10  -9   5   99.90   10.66
 -10  -9   5   94.00    9.82
  10   9  -5  106.95    6.08
  10   9  -5   95.12   39.90
  10   9  -5  107.07   10.29
 -10  -9   6  165.04    9.46
 -10  -9   6  188.99   10.09
 -10  -9   6  185.75   15.60
  10   9  -6  208.54   10.71
  10   9  -6  178.07   15.73
 -10  -9   7  111.81    6.61
 -10  -9   7  114.16    6.72
 -10  -9   7  126.36   12.22
  10   9  -7  120.01    6.90
  10   9  -7  147.55   43.74
 -10  -9   8   40.30    3.26
 -10  -9   8   52.08    7.12
 -10  -9   8   46.24    6.17
  10   9  -8   57.55    3.75
  10   9  -8   58.44   34.42
  10   9  -8   50.04    6.68
 -10  -9   9   94.75    5.82
 -10  -9   9   93.75   10.26
  10   9  -9   95.93    5.73
  10   9  -9   66.15   36.28
  10   9  -9   82.90    9.82
 -10  -9  10   11.38    3.67
  10   9 -10    8.28   16.11
  10   9 -10    9.94    3.30
 -10  -9  11    0.12    2.18
  10   9 -11   -2.07    3.22
 -10  -8   1  310.80   15.77
 -10  -8   1  301.35   23.20
 -10  -8   1  273.35   21.98
  10   8  -1  316.71   16.22
  10   8  -1  268.19   31.76
  10   8  -1  280.73   22.18
 -10  -8   2  277.71   14.23
 -10  -8   2  261.98   13.66
 -10  -8   2  260.73   21.05
 -10  -8   2  239.56   19.96
  10   8  -2  282.01   14.18
  10   8  -2  262.49   14.09
  10   8  -2  286.31   39.07
  10   8  -2  255.30   20.39
 -10  -8   3  215.84   11.53
 -10  -8   3  245.27   19.21
 -10  -8   3  218.15   17.86
  10   8  -3  216.82   11.53
  10   8  -3  263.09   39.70
  10   8  -3  217.82   17.96
 -10  -8   4   74.13    4.58
 -10  -8   4   75.30    4.59
  10   8  -4   80.12    4.73
  10   8  -4   65.36    4.72
  10   8  -4   65.97    7.95
 -10  -8   5   26.84    2.21
 -10  -8   5   26.05    2.35
 -10  -8   5   34.98    5.19
 -10  -8   5   28.06    4.47
  10   8  -5   31.64    2.52
  10   8  -5   19.19    2.49
  10   8  -5    9.71   24.98
 -10  -8   6  112.28    6.32
 -10  -8   6   99.86    5.96
 -10  -8   6  112.92   11.07
 -10  -8   6   93.82    9.97
  10   8  -6  107.16    6.16
  10   8  -6   65.75   30.91
  10   8  -6  100.30   10.41
 -10  -8   7   18.85    1.78
 -10  -8   7   15.25    1.89
 -10  -8   7   19.62    3.63
  10   8  -7   17.12    1.89
  10   8  -7   17.95    3.88
 -10  -8   8   62.61    3.98
 -10  -8   8   49.99    7.34
  10   8  -8   78.48   29.37
 -10  -8   9   45.87    3.44
 -10  -8   9   38.98    6.59
 -10  -8   9   44.99    6.13
  10   8  -9   51.83    3.52
  10   8  -9   62.97   29.40
  10   8  -9   55.38    6.99
 -10  -8  10   23.24    4.77
  10   8 -10   13.95   21.55
 -10  -8  11   21.99    4.84
  10   8 -11    9.94   10.29
  10   8 -11   24.41    5.13
 -10  -8  12   19.74    4.03
  10   8 -12   -0.36    3.48
 -10  -7   1  112.58    6.36
 -10  -7   1  122.99    6.61
 -10  -7   1   97.78   10.10
  10   7  -1  108.30    6.11
  10   7  -1  108.39    6.50
  10   7  -1  103.86   10.29
 -10  -7   2   12.74    1.41
 -10  -7   2   14.14    1.56
 -10  -7   2   19.99    3.61
 -10  -7   2   15.43    3.02
  10   7  -2   13.91    1.50
  10   7  -2   11.89    1.65
  10   7  -2    8.95   17.51
  10   7  -2   12.04    3.02
 -10  -7   3   11.10    1.41
 -10  -7   3    7.77    2.94
 -10  -7   3    9.22    2.57
  10   7  -3    9.70    1.28
  10   7  -3    9.96    1.55
  10   7  -3   19.59   22.89
  10   7  -3   11.95    2.72
 -10  -7   4  102.62    6.02
 -10  -7   4  108.30   10.84
 -10  -7   4  105.56   10.29
  10   7  -4  111.62    6.26
  10   7  -4   71.51   24.24
  10   7  -4  105.06   10.48
 -10  -7   5   87.84    5.46
 -10  -7   5   98.27    5.72
  10   7  -5  103.32    5.88
  10   7  -5   95.89    6.08
  10   7  -5   98.46    9.95
 -10  -7   6   70.92    4.45
 -10  -7   6   69.49    4.45
 -10  -7   6   74.43    8.45
  10   7  -6   66.25    4.29
  10   7  -6   73.90    4.95
  10   7  -6  103.70   25.46
 -10  -7   7   62.15    4.07
 -10  -7   7   60.72    4.05
 -10  -7   7   58.28    7.76
 -10  -7   7   60.54    7.30
  10   7  -7   67.60    4.26
  10   7  -7   73.50   29.94
  10   7  -7   71.97    8.06
 -10  -7   8  108.68    6.44
 -10  -7   8  127.38    7.00
 -10  -7   8  119.93   11.73
 -10  -7   8  113.06   10.92
  10   7  -8  132.19   31.06
  10   7  -8   98.86   11.12
 -10  -7   9  206.42   11.34
 -10  -7   9  233.05   18.94
 -10  -7   9  224.23   18.17
  10   7  -9  269.95   41.65
  10   7  -9  220.89   18.93
 -10  -7  10   73.85    4.81
 -10  -7  10   72.21    8.69
 -10  -7  10   70.60    8.08
  10   7 -10   77.21    4.77
  10   7 -10   74.71   31.50
  10   7 -10   64.32    8.88
 -10  -7  11   27.12    4.94
  10   7 -11   21.60   17.51
  10   7 -11   21.77    5.64
 -10  -7  12   26.17    5.24
 -10  -6   1  232.08   11.98
 -10  -6   1  220.54   11.54
 -10  -6   1  217.76   17.88
 -10  -6   1  193.05   17.00
  10   6  -1  241.70   12.11
  10   6  -1  218.88   11.86
  10   6  -1  244.46   25.11
  10   6  -1  213.40   17.60
 -10  -6   2  226.23   11.95
 -10  -6   2  224.10   11.79
 -10  -6   2  234.47   18.67
 -10  -6   2  204.44   17.57
  10   6  -2  254.35   12.64
  10   6  -2  212.14   11.82
  10   6  -2  235.21   18.50
 -10  -6   3  271.22   14.18
 -10  -6   3  294.67   14.74
 -10  -6   3  270.74   21.43
 -10  -6   3  242.87   20.40
  10   6  -3  304.52   15.01
  10   6  -3  259.62   14.09
  10   6  -3  287.06   32.75
  10   6  -3  271.71   21.35
 -10  -6   4  124.03    6.88
 -10  -6   4  113.88    6.47
 -10  -6   4  126.48   11.57
 -10  -6   4   98.07   10.52
  10   6  -4  122.07    6.73
  10   6  -4  117.06    6.88
  10   6  -4  101.83   22.04
  10   6  -4  116.59   11.21
 -10  -6   5   85.40    5.12
 -10  -6   5   98.28    9.62
 -10  -6   5   81.97    8.82
  10   6  -5   98.43    5.53
  10   6  -5   94.16   19.78
  10   6  -5   71.68    8.92
 -10  -6   6  116.94   10.92
 -10  -6   6  104.67   10.17
  10   6  -6  102.81    6.00
  10   6  -6   96.11    6.17
  10   6  -6   92.44   22.20
  10   6  -6   95.63   10.46
 -10  -6   7   29.64    2.32
 -10  -6   7   32.17    5.04
 -10  -6   7   29.99    4.71
  10   6  -7   24.49    2.60
  10   6  -7   42.91   18.32
  10   6  -7   24.38    5.17
 -10  -6   8   28.71    2.52
 -10  -6   8   32.39    5.22
 -10  -6   8   31.83    4.88
  10   6  -8   32.17    2.57
 -10  -6   9   12.46    1.44
 -10  -6   9   12.84    1.79
 -10  -6   9   14.48    3.47
 -10  -6   9   12.57    3.10
  10   6  -9   13.29    1.69
  10   6  -9    2.70   17.07
  10   6  -9    7.23    3.85
 -10  -6  10    6.15    1.03
 -10  -6  10    5.08    1.35
 -10  -6  10    7.23    2.58
 -10  -6  10    5.59    2.30
  10   6 -10    6.75    1.28
  10   6 -10   25.90   18.29
  10   6 -10    5.79    3.25
 -10  -6  11    9.88    1.82
 -10  -6  11    9.26    3.30
 -10  -6  11   15.10    3.21
  10   6 -11   14.05    1.75
  10   6 -11   -0.07   16.71
  10   6 -11   11.69    4.72
 -10  -6  12   23.28    4.65
  10   6 -12   21.30   12.67
  10   6 -12   24.40    6.11
 -10  -6  13   11.03    3.19
  10   6 -13    3.15    4.32
 -10  -5   1  331.69   16.82
 -10  -5   1  328.65   16.61
 -10  -5   1  332.29   24.55
  10   5  -1  304.24   15.86
  10   5  -1  296.02   16.02
  10   5  -1  342.50   29.02
 -10  -5   2   82.64    4.88
 -10  -5   2   76.80    4.66
 -10  -5   2   95.40    9.02
 -10  -5   2   75.89    8.38
  10   5  -2   92.11    5.10
  10   5  -2   77.04    4.99
  10   5  -2   65.59   17.45
  10   5  -2   75.38    8.70
 -10  -5   3   18.93    1.76
 -10  -5   3   21.25    1.87
 -10  -5   3   18.18    3.61
  10   5  -3   21.91    1.86
  10   5  -3   19.21    2.04
  10   5  -3   19.52    3.99
 -10  -5   4   23.55    1.96
 -10  -5   4   24.08    2.06
 -10  -5   4   18.18    4.02
 -10  -5   4   20.44    3.86
  10   5  -4   22.27    1.95
  10   5  -4   21.69    2.18
  10   5  -4   18.47   13.46
  10   5  -4   21.74    4.29
 -10  -5   5   29.46    2.38
 -10  -5   5   32.89    2.58
 -10  -5   5   34.86    5.16
 -10  -5   5   31.22    4.83
  10   5  -5   35.07    2.61
  10   5  -5   28.62    2.61
  10   5  -5   26.61   12.83
  10   5  -5   36.18    5.48
 -10  -5   6   11.39    1.35
 -10  -5   6   12.78    1.61
  10   5  -6   12.47    1.52
  10   5  -6   -0.03    9.77
  10   5  -6    8.31    3.48
 -10  -5   7    9.19    1.22
 -10  -5   7    8.80    1.53
 -10  -5   7    5.38    2.53
 -10  -5   7    6.95    2.40
  10   5  -7    8.83    1.33
  10   5  -7    7.32    1.46
  10   5  -7    8.46   11.47
  10   5  -7    8.92    3.31
 -10  -5   8   82.99    4.93
 -10  -5   8   67.71    8.36
 -10  -5   8   75.01    8.33
  10   5  -8   78.93    5.29
  10   5  -8   94.38   19.37
  10   5  -8   70.44    9.24
 -10  -5   9  165.35    9.21
 -10  -5   9  169.76    9.35
 -10  -5   9  167.22   14.99
 -10  -5   9  162.40   14.63
  10   5  -9  172.44    9.35
  10   5  -9  207.48   26.55
  10   5  -9  178.52   16.29
 -10  -5  10   73.79    4.83
 -10  -5  10   72.67    8.35
 -10  -5  10   62.70    8.02
  10   5 -10   74.14    4.62
  10   5 -10   92.99   22.18
 -10  -5  11   90.17    9.95
 -10  -5  11   95.38    9.88
  10   5 -11  100.92    5.90
  10   5 -11  125.59   24.00
  10   5 -11   85.89   11.50
 -10  -5  12   99.23    6.35
 -10  -5  12  118.23   11.22
  10   5 -12  113.26    6.52
  10   5 -12   76.57   16.46
  10   5 -12  106.71   13.44
 -10  -5  13   15.48    3.66
  10   5 -13    6.61    6.03
  10   5 -13   10.96    5.40
 -10  -5  14    3.82    2.67
 -10  -4   1   23.13    1.94
 -10  -4   1   29.08    2.14
  10   4  -1   22.38    1.90
  10   4  -1   27.06    2.30
  10   4  -1   23.16    4.40
 -10  -4   2  398.40   19.34
 -10  -4   2  367.80   18.31
 -10  -4   2  328.21   25.61
  10   4  -2  343.66   17.62
  10   4  -2  331.15   17.60
  10   4  -2  391.62   33.56
  10   4  -2  334.63   26.26
 -10  -4   3  389.56   20.00
 -10  -4   3  377.22   19.51
 -10  -4   3  388.69   28.99
 -10  -4   3  401.26   29.23
  10   4  -3  428.48   21.00
  10   4  -3  377.60   19.90
  10   4  -3  444.76   37.36
  10   4  -3  407.55   30.05
 -10  -4   4   26.51    2.11
 -10  -4   4   24.21    2.11
 -10  -4   4   26.25    4.27
 -10  -4   4   24.73    4.13
  10   4  -4   23.60    2.04
  10   4  -4   18.32    2.05
  10   4  -4   25.39   11.39
  10   4  -4   22.62    4.83
 -10  -4   5   12.18    1.36
 -10  -4   5   11.60    1.54
 -10  -4   5    9.05    2.91
  10   4  -5   14.73    1.53
  10   4  -5    9.82    1.51
  10   4  -5    2.63    8.30
 -10  -4   6  235.69   12.48
 -10  -4   6  225.47   12.12
 -10  -4   6  246.97   19.46
 -10  -4   6  211.46   18.45
  10   4  -6  247.62   12.77
  10   4  -6  255.29   13.37
  10   4  -6  239.92   24.24
  10   4  -6  245.23   20.32
 -10  -4   7  369.98   18.90
 -10  -4   7  363.14   18.64
 -10  -4   7  344.08   26.81
  10   4  -7  379.87   19.11
  10   4  -7  343.90   18.49
  10   4  -7  410.59   29.79
 -10  -4   8  231.22   12.47
 -10  -4   8  248.54   12.96
 -10  -4   8  252.57   19.87
 -10  -4   8  222.21   19.05
  10   4  -8  245.08   12.82
  10   4  -8  239.20   13.00
  10   4  -8  286.44   26.78
 -10  -4   9  137.63    7.56
 -10  -4   9  125.36    7.24
 -10  -4   9  125.54   12.09
 -10  -4   9  118.65   11.88
  10   4  -9  125.25    7.18
  10   4  -9  154.58   21.17
  10   4  -9  139.67   14.28
 -10  -4  10   33.15    2.64
 -10  -4  10   36.32    2.93
  10   4 -10   38.45    2.74
  10   4 -10   24.94   12.11
  10   4 -10   36.40    7.46
 -10  -4  11    0.99    0.64
 -10  -4  11    2.93    1.56
 -10  -4  11    0.39    1.35
  10   4 -11  -10.56   10.99
  10   4 -11    1.42    4.91
 -10  -4  12    0.76    1.30
 -10  -4  12    0.90    1.44
  10   4 -12   -0.15    0.96
  10   4 -12   -1.62    4.92
 -10  -4  13    2.05    1.77
  10   4 -13   -8.66    7.72
  10   4 -13    5.50    5.40
 -10  -4  14    2.03    1.65
  10   4 -14   -2.70    3.80
  10   4 -14   -3.59    5.07
 -10  -3   1  298.13   14.67
 -10  -3   1  247.68   13.09
  10   3  -1  267.18   13.64
  10   3  -1  249.93   13.48
 -10  -3   2  165.40    8.71
 -10  -3   2  147.55    8.12
 -10  -3   2  158.46   13.52
 -10  -3   2  161.56   13.59
  10   3  -2  157.49    8.40
  10   3  -2  137.24    8.11
  10   3  -2  177.34   18.55
  10   3  -2  148.84   14.06
 -10  -3   3  197.13   10.43
 -10  -3   3  195.03   10.27
 -10  -3   3  194.06   16.11
 -10  -3   3  202.53   16.37
  10   3  -3  194.63   10.29
  10   3  -3  178.26   10.11
  10   3  -3  192.26   20.48
  10   3  -3  199.55   17.23
 -10  -3   4  139.92    7.89
 -10  -3   4  149.33    8.09
 -10  -3   4  152.33   13.25
 -10  -3   4  148.02   13.18
  10   3  -4  157.06    8.33
  10   3  -4  144.83    8.27
  10   3  -4  144.22   16.97
  10   3  -4  141.35   14.04
 -10  -3   5   40.31    2.85
 -10  -3   5   38.14    2.83
 -10  -3   5   40.93    5.55
 -10  -3   5   38.99    5.58
  10   3  -5   45.05    3.04
  10   3  -5   33.53    2.87
  10   3  -5   41.48    9.14
  10   3  -5   41.03    6.99
 -10  -3   6   40.12    2.87
 -10  -3   6   45.38    5.72
 -10  -3   6   39.86    5.66
  10   3  -6   35.41    3.00
  10   3  -6   33.90    8.89
  10   3  -6   38.61    7.12
 -10  -3   7   10.14    1.26
 -10  -3   7    9.18    1.55
  10   3  -7   10.06    1.41
  10   3  -7    8.07    1.47
  10   3  -7   10.34    6.79
  10   3  -7   13.78    4.73
 -10  -3   8   17.99    1.73
 -10  -3   8   20.57    2.02
 -10  -3   8   11.93    3.45
 -10  -3   8   13.98    3.57
  10   3  -8   20.27    1.90
  10   3  -8   18.18    2.05
  10   3  -8   23.89    7.49
  10   3  -8   17.87    5.63
 -10  -3   9  107.88    6.24
 -10  -3   9  107.17    6.32
 -10  -3   9   96.09   10.34
 -10  -3   9  103.98   10.65
  10   3  -9  114.10    6.43
  10   3  -9  103.02    6.47
  10   3  -9  159.70   19.06
 -10  -3  10  103.25    6.06
 -10  -3  10   91.91    5.77
 -10  -3  10   96.88   10.09
 -10  -3  10  100.62   10.27
  10   3 -10  101.51    5.95
  10   3 -10  118.46   16.48
  10   3 -10  103.46   12.87
 -10  -3  11   83.47    5.16
 -10  -3  11   86.77    5.37
 -10  -3  11   83.27    9.16
 -10  -3  11   75.76    9.17
  10   3 -11   95.55    5.56
  10   3 -11  127.36   17.78
  10   3 -11   91.88   12.56
 -10  -3  12   64.43    4.23
 -10  -3  12   71.38    4.68
 -10  -3  12   64.39    7.92
 -10  -3  12   64.21    8.04
  10   3 -12   75.83    4.67
  10   3 -12   84.81   17.22
  10   3 -12   81.80   12.33
 -10  -3  13   36.65    3.08
 -10  -3  13   41.19    5.76
  10   3 -13   38.65    2.95
  10   3 -13   24.40    9.71
  10   3 -13   33.02    8.75
 -10  -3  14   49.04    6.10
  10   3 -14   22.00    7.20
  10   3 -14   32.09    8.12
 -10  -3  15   81.53    9.45
 -10  -2   1    0.16    0.38
 -10  -2   1    0.32    0.69
  10   2  -1   -0.07    0.67
  10   2  -1    0.04    0.67
 -10  -2   2    0.37    0.47
 -10  -2   2    0.90    0.83
  10   2  -2   -0.15    0.66
  10   2  -2    0.97    0.80
 -10  -2   3    4.82    0.80
 -10  -2   3    2.93    0.99
 -10  -2   3    1.94    1.49
  10   2  -3    4.06    0.96
  10   2  -3    4.64    1.08
  10   2  -3    3.95    5.70
 -10  -2   4    8.90    1.13
 -10  -2   4    9.76    1.34
 -10  -2   4    7.94    2.41
 -10  -2   4    9.00    2.63
  10   2  -4   10.96    1.35
  10   2  -4    8.84    1.41
  10   2  -4    6.09    4.67
  10   2  -4    3.51    4.20
 -10  -2   5  188.21   10.32
 -10  -2   5  216.50   11.07
 -10  -2   5  195.32   16.62
  10   2  -5  188.97   10.29
  10   2  -5  206.74   11.10
  10   2  -5  212.85   18.60
 -10  -2   6  402.02   20.44
 -10  -2   6  403.66   20.46
 -10  -2   6  386.51   29.11
  10   2  -6  416.87   20.83
  10   2  -6  387.21   20.24
  10   2  -6  420.01   32.06
 -10  -2   7  234.24   12.63
 -10  -2   7  242.51   13.03
  10   2  -7  268.85   13.91
  10   2  -7  249.34   21.83
  10   2  -7  246.08   21.84
 -10  -2   8  208.70   11.31
 -10  -2   8  201.64   17.63
  10   2  -8  232.42   11.96
  10   2  -8  229.57   20.68
 -10  -2   9  235.22   12.67
 -10  -2   9  242.47   12.92
 -10  -2   9  240.09   19.53
 -10  -2   9  221.61   19.47
  10   2  -9  274.83   13.79
  10   2  -9  248.98   13.39
  10   2  -9  288.89   23.98
 -10  -2  10   88.29    5.43
 -10  -2  10   87.89    5.58
 -10  -2  10   95.68    9.70
 -10  -2  10   92.74    9.92
  10   2 -10   98.78    5.83
  10   2 -10   99.22    6.16
  10   2 -10  112.86   13.78
  10   2 -10   84.06   12.97
 -10  -2  11    2.93    0.79
 -10  -2  11    2.18    1.24
 -10  -2  11    2.11    1.54
 -10  -2  11    2.43    1.90
  10   2 -11    1.45    0.95
  10   2 -11   -4.31    5.85
  10   2 -11    5.68    6.68
 -10  -2  12   10.91    1.36
 -10  -2  12   10.50    2.77
 -10  -2  12    6.95    2.89
  10   2 -12    8.12    1.54
  10   2 -12    6.04    7.07
  10   2 -12   13.04    8.38
 -10  -2  13   44.51    3.55
 -10  -2  13   46.98    6.64
  10   2 -13   47.88    3.38
  10   2 -13   57.84   12.01
 -10  -2  14   19.79    3.92
  10   2 -14   11.46    7.06
  10   2 -14   13.76    8.65
 -10  -2  15    2.30    1.89
  10   2 -15    2.90    3.33
  10   2 -15    5.80    5.60
 -10  -1   1   99.41    5.60
 -10  -1   1   94.76    5.40
  10   1  -1   99.83    5.54
  10   1  -1   96.99    5.71
 -10  -1   2  384.63   19.56
 -10  -1   2  382.09   19.38
  10   1  -2  399.23   19.89
  10   1  -2  383.27   19.70
 -10  -1   3  439.45   21.76
 -10  -1   3  410.03   20.83
 -10  -1   3  391.54   29.62
 -10  -1   3  435.52   30.89
  10   1  -3  433.05   21.50
  10   1  -3  407.57   21.04
  10   1  -3  400.88   31.04
  10   1  -3  440.36   32.77
 -10  -1   4  327.56   16.14
 -10  -1   4  287.70   14.94
 -10  -1   4  284.98   22.26
 -10  -1   4  301.47   22.91
  10   1  -4  309.26   15.55
  10   1  -4  285.67   15.15
  10   1  -4  285.52   23.36
  10   1  -4  274.77   23.87
 -10  -1   5  305.48   15.95
 -10  -1   5  328.68   24.34
 -10  -1   5  325.45   24.56
  10   1  -5  323.38   16.47
  10   1  -5  329.36   25.59
  10   1  -5  296.99   25.45
 -10  -1   6  227.41   11.93
 -10  -1   6  209.65   11.41
 -10  -1   6  230.02   18.25
 -10  -1   6  236.93   18.77
  10   1  -6  219.36   11.67
  10   1  -6  227.57   12.17
 -10  -1   7  142.88    7.80
 -10  -1   7  137.76    7.68
  10   1  -7  138.22    7.65
  10   1  -7  130.98    7.71
 -10  -1   8   10.06    1.26
 -10  -1   8    7.79    1.50
 -10  -1   8   12.27    2.73
 -10  -1   8   10.82    3.05
  10   1  -8   12.75    1.59
  10   1  -8    9.21    1.57
  10   1  -8    7.44    4.04
  10   1  -8    1.84    6.76
 -10  -1   9    0.91    0.58
 -10  -1   9   -0.31    1.19
 -10  -1   9    1.67    1.12
 -10  -1   9    0.53    1.54
  10   1  -9    0.56    0.89
  10   1  -9   -0.81    0.82
  10   1  -9   -2.31    3.39
  10   1  -9   -7.46    6.30
 -10  -1  10    7.46    1.13
 -10  -1  10    7.31    1.52
 -10  -1  10    8.29    2.42
 -10  -1  10    7.81    2.82
  10   1 -10    8.80    1.38
  10   1 -10    7.67    1.50
  10   1 -10    8.47    4.55
  10   1 -10   13.37    8.14
 -10  -1  11   18.99    1.83
 -10  -1  11   18.21    2.09
 -10  -1  11   20.12    3.73
 -10  -1  11   16.16    3.98
  10   1 -11   17.49    1.91
  10   1 -11   13.95    6.47
  10   1 -11   11.12    8.94
 -10  -1  12   52.83    3.51
 -10  -1  12   47.25    3.50
 -10  -1  12   43.05    6.22
  10   1 -12   47.80    3.40
  10   1 -12   57.77    9.61
 -10  -1  13   43.90    3.18
 -10  -1  13   43.07    3.40
 -10  -1  13   41.04    6.01
 -10  -1  13   45.01    6.47
  10   1 -13   48.58    3.38
  10   1 -13   43.09    9.76
  10   1 -13   65.14   13.87
 -10  -1  14   50.55    3.68
 -10  -1  14   43.71    6.17
  10   1 -14   44.71    3.31
  10   1 -14   38.74    8.88
  10   1 -15   64.03   12.92
 -10   0   1  660.79   32.42
 -10   0   1  615.90   31.07
  10   0  -1  657.11   32.23
  10   0  -1  636.59   31.89
 -10   0   2  192.97   10.13
 -10   0   2  182.76    9.79
  10   0  -2  200.17   10.28
  10   0  -2  189.04   10.20
 -10   0   3   25.44    2.01
 -10   0   3   22.48    2.05
 -10   0   3   30.40    4.23
 -10   0   3   33.72    4.44
  10   0  -3   26.66    2.08
  10   0  -3   23.93    2.16
  10   0  -3   21.00    4.58
  10   0  -3   23.59    8.27
 -10   0   4   42.08    2.87
 -10   0   4   36.29    2.82
 -10   0   4   54.69    5.86
 -10   0   4   52.26    6.08
  10   0  -4   44.27    2.96
  10   0  -4   36.98    2.94
  10   0  -4   41.80    6.12
  10   0  -4   28.80    8.30
 -10   0   5   22.40    1.89
 -10   0   5   26.33    2.18
 -10   0   5   21.64    3.96
 -10   0   5   20.41    4.20
  10   0  -5   24.13    2.05
  10   0  -5   29.26    2.37
  10   0  -5   25.98    4.67
  10   0  -5   26.90    7.00
 -10   0   6   98.64    5.84
 -10   0   6  110.40    6.23
 -10   0   6  108.57   10.29
 -10   0   6  102.97   10.54
  10   0  -6  106.47    6.07
  10   0  -6  103.94   10.83
  10   0  -6  107.74   13.54
 -10   0   7   28.66    2.34
 -10   0   7   37.63    2.79
  10   0  -7   31.61    2.53
  10   0  -7   37.69    2.91
  10   0  -7   29.50    5.31
  10   0  -7   38.97    8.89
 -10   0   8  108.33    6.24
 -10   0   8  104.32   10.83
  10   0  -8  112.79    6.63
  10   0  -8  102.60   11.09
  10   0  -8  116.12   14.24
 -10   0   9  238.92   12.92
 -10   0   9  268.80   13.68
 -10   0   9  243.16   20.04
  10   0  -9  242.97   12.84
  10   0  -9  234.79   12.91
 -10   0  10  126.34    7.35
 -10   0  10  139.05    7.81
 -10   0  10  123.66   12.10
 -10   0  10  126.40   12.79
  10   0 -10  169.75    8.65
  10   0 -10  145.15    8.24
  10   0 -10  132.57   13.64
  10   0 -10  128.24   18.01
 -10   0  11  131.93    7.69
 -10   0  11  140.36    8.16
 -10   0  11  152.66   13.16
 -10   0  11  153.80   13.80
  10   0 -11  140.98    8.26
 -10   0  12  130.60    7.35
 -10   0  12  121.63    7.21
 -10   0  12  127.98   11.90
 -10   0  12  125.04   12.50
  10   0 -12  129.17    7.30
 -10   0  13  133.22    7.61
 -10   0  13  136.91   12.56
 -10   0  13  129.23   13.00
  10   0 -13  147.45   15.41
  10   0 -13  161.24   21.96
 -10   0  14   43.29    3.41
 -10   0  14   44.73    5.95
  10   0 -14   39.96    3.10
  10   0 -14   33.65    7.40
  10   0 -14   39.96   12.37
 -10   0  15   31.76    4.95
  10   0 -15   25.56    6.95
  10   0 -15   16.89    8.84
 -10   0  16   14.13    3.42
  10   0 -16    5.20    4.50
 -10   1   1   15.45    1.40
 -10   1   1   15.21    1.48
  10  -1  -1   16.98    1.46
  10  -1  -1   18.64    1.68
 -10   1   2   79.73    4.71
 -10   1   2   83.08    4.81
  10  -1  -2   84.79    4.84
  10  -1  -2   91.01    5.22
 -10   1   3  328.16   16.70
 -10   1   3  290.20   15.55
 -10   1   3  321.52   24.47
 -10   1   3  360.55   25.36
  10  -1  -3  329.68   16.64
  10  -1  -3  352.04   17.57
 -10   1   4  509.70   25.68
 -10   1   4  499.14   25.38
 -10   1   4  520.44   36.93
 -10   1   4  491.08   35.85
  10  -1  -4  513.57   25.75
  10  -1  -4  510.63   25.90
  10  -1  -4  536.31   37.22
  10  -1  -4  586.73   42.62
 -10   1   5  218.32   11.77
 -10   1   5  238.34   19.10
 -10   1   5  234.55   18.64
  10  -1  -5  239.34   12.55
  10  -1  -5  233.00   18.79
  10  -1  -5  242.68   22.67
 -10   1   6  198.43   10.95
 -10   1   6  216.72   11.53
 -10   1   6  224.66   18.36
 -10   1   6  220.45   17.82
  10  -1  -6  242.59   12.25
  10  -1  -6  207.00   11.41
  10  -1  -6  223.92   18.10
  10  -1  -6  243.52   22.19
 -10   1   7  242.31   13.10
 -10   1   7  258.31   13.60
  10  -1  -7  295.83   14.61
  10  -1  -7  262.19   13.90
  10  -1  -7  258.46   20.74
  10  -1  -7  269.42   24.99
 -10   1   8  202.23   10.81
 -10   1   8  204.73   10.94
 -10   1   8  202.31   17.30
 -10   1   8  201.91   16.82
  10  -1  -8  199.45   10.72
  10  -1  -8  205.41   11.13
  10  -1  -8  194.60   16.98
  10  -1  -8  236.39   22.24
 -10   1   9  213.36   11.63
 -10   1   9  233.28   12.22
 -10   1   9  236.42   19.18
  10  -1  -9  235.32   12.23
  10  -1  -9  202.62   11.54
  10  -1  -9  291.09   25.03
 -10   1  10  100.73    6.11
 -10   1  10  109.61    6.46
 -10   1  10  120.86   11.17
  10  -1 -10  109.78    6.39
  10  -1 -10  118.61    6.97
  10  -1 -10  110.60   11.44
 -10   1  11    3.89    0.91
 -10   1  11    2.37    1.26
 -10   1  11    5.96    2.46
 -10   1  11    5.25    2.11
  10  -1 -11    3.19    1.00
  10  -1 -11    2.71    1.28
  10  -1 -11    3.29    2.70
  10  -1 -11    9.01   10.14
 -10   1  12    0.25    0.61
 -10   1  12   -0.09    1.09
 -10   1  12   -1.02    1.90
 -10   1  12    1.29    1.41
  10  -1 -12   -0.25    0.85
  10  -1 -12   -0.76    2.93
  10  -1 -12    4.24   10.69
 -10   1  13   11.65    1.52
 -10   1  13   14.85    1.95
 -10   1  13   12.07    3.68
  10  -1 -13   12.75    1.71
  10  -1 -13   12.04    4.52
  10  -1 -13   19.58   12.58
 -10   1  14   11.72    1.88
 -10   1  14    5.72    3.01
  10  -1 -14    7.44    1.34
  10  -1 -14    5.86   11.70
 -10   1  15   45.84    5.94
  10  -1 -15   44.81    3.56
  10  -1 -15   26.42    7.02
  10  -1 -15   21.69   10.49
 -10   1  16   88.30    7.95
  10  -1 -16   57.32    8.66
  10  -1 -16   20.44    7.82
  10  -2  -1  457.16   22.61
  10  -2  -1  442.53   22.38
 -10   2   2  165.65    8.76
 -10   2   2  153.96    8.43
 -10   2   2  160.34   13.96
 -10   2   2  172.54   14.19
  10  -2  -2  172.61    8.91
  10  -2  -2  163.26    8.87
  10  -2  -2  161.98   13.95
  10  -2  -2  187.78   16.80
 -10   2   3  154.58    8.49
 -10   2   3  164.37   14.01
  10  -2  -3  168.19    8.81
  10  -2  -3  150.73    8.61
  10  -2  -3  178.55   14.34
  10  -2  -3  215.17   23.15
 -10   2   4  223.60   11.76
 -10   2   4  208.82   11.37
 -10   2   4  263.93   19.49
 -10   2   4  236.68   18.45
  10  -2  -4  247.92   12.42
  10  -2  -4  211.42   11.61
 -10   2   5   30.20    2.25
 -10   2   5   27.50    2.33
 -10   2   5   35.20    5.11
 -10   2   5   29.98    4.66
  10  -2  -5   32.30    2.36
  10  -2  -5   28.62    2.41
  10  -2  -5   37.89    4.85
  10  -2  -5   39.56   11.28
 -10   2   6    2.94    0.71
 -10   2   6    1.50    1.00
  10  -2  -6    1.46    0.82
  10  -2  -6    2.49    0.98
  10  -2  -6    3.96    1.54
  10  -2  -6    3.47    8.42
 -10   2   7   93.04    5.74
 -10   2   7  110.32   11.03
 -10   2   7  110.64   10.38
  10  -2  -7  100.20    5.86
  10  -2  -7  110.62   10.44
  10  -2  -7  124.52   16.62
 -10   2   8   38.67    2.85
 -10   2   8   39.20    3.05
 -10   2   8   47.97    6.32
 -10   2   8   44.68    5.80
  10  -2  -8   41.66    2.98
  10  -2  -8   38.87    3.12
  10  -2  -8   49.25    6.02
  10  -2  -8   54.07   13.33
 -10   2   9   47.03    3.38
 -10   2   9   55.13    7.20
  10  -2  -9   63.62    4.16
  10  -2  -9   69.14   13.73
 -10   2  10  341.94   17.81
 -10   2  10  332.05   26.47
 -10   2  10  353.43   26.35
  10  -2 -10  349.67   17.91
  10  -2 -10  356.40   26.67
 -10   2  11  176.70    9.61
 -10   2  11  174.52    9.69
 -10   2  11  173.54   15.86
 -10   2  11  177.29   15.34
  10  -2 -11  171.37    9.49
  10  -2 -11  169.96    9.78
  10  -2 -11  187.90   15.97
  10  -2 -11  212.42   23.68
 -10   2  12  165.44    9.37
 -10   2  12  171.71    9.69
 -10   2  12  184.58   16.33
  10  -2 -12  182.41    9.87
  10  -2 -12  184.55   10.36
  10  -2 -12  231.63   25.36
 -10   2  13   30.06    2.47
 -10   2  13   30.69    2.79
 -10   2  13   25.54    5.48
 -10   2  13   34.51    5.21
  10  -2 -13   29.41    2.57
  10  -2 -13   40.15    6.08
  10  -2 -13   33.26   15.10
 -10   2  14   54.32    3.64
 -10   2  14   51.33    3.87
 -10   2  14   51.40    7.28
 -10   2  14   59.95    7.10
  10  -2 -14   46.31    3.49
  10  -2 -14   46.19    7.44
  10  -2 -14   66.21   17.74
 -10   2  15  199.34   10.89
 -10   2  15  186.36   16.15
  10  -2 -15  184.42   10.15
  10  -2 -15  172.00   16.42
  10  -2 -15  159.33   21.40
  10  -2 -16   38.80    6.83
  10  -2 -16   33.68   10.40
 -10   3   1   90.35    5.03
 -10   3   1   88.42    5.00
 -10   3   1  100.12    9.45
 -10   3   1   90.05    9.39
  10  -3  -1   94.33    5.11
  10  -3  -1   93.16    5.25
  10  -3  -1  109.03    9.63
 -10   3   2    0.13    0.31
 -10   3   2    0.33    0.61
 -10   3   2   -0.41    0.62
 -10   3   2   -0.07    0.66
  10  -3  -2    0.10    0.44
  10  -3  -2    0.53    0.58
  10  -3  -2    0.40    0.54
  10  -3  -2    2.69    6.75
 -10   3   3  112.75    6.23
 -10   3   3  116.13    6.35
 -10   3   3   98.87   10.57
 -10   3   3  116.07   10.82
  10  -3  -3  113.41    6.21
  10  -3  -3  120.78    6.65
  10  -3  -3  126.57   10.98
  10  -3  -3  159.82   20.49
 -10   3   4   18.73    1.73
 -10   3   4   13.51    3.59
 -10   3   4   18.24    3.43
  10  -3  -4   17.59    1.58
  10  -3  -4   19.40    3.43
  10  -3  -4   35.19   14.68
 -10   3   5    6.69    1.00
 -10   3   5    6.89    1.22
  10  -3  -5    7.79    1.10
  10  -3  -5    7.74    1.24
  10  -3  -5   27.90   13.21
 -10   3   6  214.08   11.32
 -10   3   6  200.23   11.02
 -10   3   6  215.73   18.17
 -10   3   6  218.89   17.71
  10  -3  -6  223.20   11.59
  10  -3  -6  218.75   11.66
  10  -3  -6  227.11   17.88
  10  -3  -6  276.58   26.29
 -10   3   7  294.10   15.43
 -10   3   7  285.04   15.26
 -10   3   7  307.06   24.04
 -10   3   7  332.16   24.09
  10  -3  -7  310.71   15.91
  10  -3  -7  296.30   15.72
  10  -3  -7  322.23   23.79
  10  -3  -7  342.53   31.23
 -10   3   8   73.59    4.60
 -10   3   8   74.02    4.74
 -10   3   8   77.95    9.01
 -10   3   8   83.57    8.58
  10  -3  -8   77.52    4.74
  10  -3  -8   81.70    5.09
  10  -3  -8   84.38    8.62
  10  -3  -8   90.85   16.16
 -10   3   9  217.00   11.73
 -10   3   9  214.22   11.78
 -10   3   9  237.51   19.39
  10  -3  -9  226.60   12.01
  10  -3  -9  251.97   13.01
 -10   3  10  204.43   11.40
 -10   3  10  213.15   11.80
 -10   3  10  232.64   19.43
 -10   3  10  239.30   18.79
  10  -3 -10  231.73   12.21
  10  -3 -10  237.28   12.64
  10  -3 -10  246.07   19.08
 -10   3  11   59.29    4.04
 -10   3  11   63.59    4.38
 -10   3  11   65.30    8.37
 -10   3  11   72.39    7.86
  10  -3 -11   72.30    4.48
  10  -3 -11   62.71    4.48
  10  -3 -11   72.89    8.05
  10  -3 -11   80.29   17.84
 -10   3  12   17.63    1.74
 -10   3  12   16.10    4.04
  10  -3 -12   10.48    1.71
  10  -3 -12   12.33    1.71
  10  -3 -12   23.04   14.95
 -10   3  13   26.37    2.40
 -10   3  13   34.01    2.91
 -10   3  13   35.78    5.18
  10  -3 -13   29.21    2.55
  10  -3 -13   41.06    5.71
  10  -3 -13   23.02   17.16
 -10   3  14   59.26    3.98
 -10   3  14   52.29    4.34
 -10   3  14   62.34    8.25
 -10   3  14   65.49    7.74
  10  -3 -14   66.36    4.33
  10  -3 -14   83.41    8.69
  10  -3 -14   92.80   20.28
 -10   3  15    3.43    1.55
 -10   3  15    3.14    2.18
  10  -3 -15    3.93    1.26
  10  -3 -15    2.21    2.65
 -10   3  16    0.56    1.78
  10  -3 -16   -2.08    7.59
 -10   4   1  125.92    6.92
  10  -4  -1  153.77   12.79
  10  -4  -1  142.29   14.48
 -10   4   2  244.13   12.77
 -10   4   2  248.20   12.94
  10  -4  -2  262.66   13.28
  10  -4  -2  249.80   13.05
  10  -4  -2  298.33   21.36
  10  -4  -2  328.63   27.42
 -10   4   3  275.61   14.37
 -10   4   3  267.76   14.23
  10  -4  -3  324.45   23.17
  10  -4  -3  421.11   36.35
 -10   4   4  280.77   14.79
 -10   4   4  285.76   15.02
  10  -4  -4  285.98   14.90
  10  -4  -4  306.47   15.72
  10  -4  -4  349.30   24.24
  10  -4  -4  482.05   42.87
 -10   4   5  151.33    8.30
 -10   4   5  146.76    8.27
 -10   4   5  162.76   14.33
 -10   4   5  159.10   13.94
  10  -4  -5  158.96    8.52
  10  -4  -5  158.06    8.70
  10  -4  -5  179.43   14.27
  10  -4  -5  222.69   28.62
 -10   4   6  187.76    9.97
 -10   4   6  172.26    9.68
 -10   4   6  195.21   16.49
 -10   4   6  187.41   15.84
  10  -4  -6  195.72   10.23
  10  -4  -6  181.30   10.02
  10  -4  -6  208.89   16.24
 -10   4   7  369.30   18.87
 -10   4   7  340.49   18.21
 -10   4   7  385.99   28.63
 -10   4   7  395.88   28.31
  10  -4  -7  377.39   19.14
  10  -4  -7  382.19   19.46
 -10   4   8   50.59    3.64
 -10   4   8   58.86    7.35
 -10   4   8   56.05    6.77
  10  -4  -8   54.00    3.60
  10  -4  -8   59.67    6.81
  10  -4  -8   42.11   17.13
 -10   4   9   10.13    1.33
 -10   4   9   12.96    1.71
 -10   4   9   10.03    3.37
  10  -4  -9   10.85    1.43
  10  -4  -9   16.17    1.80
  10  -4  -9   -2.03   14.74
 -10   4  10    0.07    0.63
 -10   4  10    0.31    0.95
  10  -4 -10    0.19    0.98
  10  -4 -10    0.16    1.08
 -10   4  11   -0.24    0.63
 -10   4  11    0.80    1.00
 -10   4  11    1.15    2.09
 -10   4  11    1.67    1.21
  10  -4 -11    0.20    0.94
  10  -4 -11    3.00    1.50
  10  -4 -11   -1.57   12.46
 -10   4  12   12.95    1.54
 -10   4  12   13.78    1.98
 -10   4  12   14.09    3.99
  10  -4 -12   11.41    1.64
  10  -4 -12   15.44    1.96
  10  -4 -12    3.61   15.08
 -10   4  13   43.70    3.20
 -10   4  13   45.94    3.66
 -10   4  13   54.25    6.41
  10  -4 -13   39.32    3.08
  10  -4 -13   50.88    6.52
 -10   4  14  111.67    6.71
 -10   4  14  120.58    7.40
 -10   4  14  112.04   12.27
 -10   4  14  129.03   11.88
  10  -4 -14  122.75    7.10
  10  -4 -14  134.65   12.30
  10  -4 -14  126.62   23.87
 -10   4  15   71.56    5.11
 -10   4  15   74.62    8.44
  10  -4 -15   72.15    8.63
 -10   4  16  128.68   12.34
 -10   5   1  208.58   17.37
 -10   5   1  211.03   19.13
  10  -5  -1  241.60   21.30
 -10   5   2  215.32   11.80
 -10   5   2  273.70   20.32
  10  -5  -2  375.24   29.89
 -10   5   3   12.56    1.11
 -10   5   3   10.51    1.31
 -10   5   3   19.31    3.15
  10  -5  -3   13.46    1.22
  10  -5  -3   10.50    1.24
  10  -5  -3   26.19   16.75
 -10   5   4    0.81    0.41
 -10   5   4    2.63    1.29
 -10   5   4    0.32    1.56
  10  -5  -4   -0.50    0.49
  10  -5  -4    0.28    0.68
  10  -5  -4    0.57    0.94
  10  -5  -4   29.57   21.42
 -10   5   5    1.48    0.56
 -10   5   5    1.82    0.86
 -10   5   5    0.86    1.52
 -10   5   5    2.36    1.81
  10  -5  -5    0.70    0.63
  10  -5  -5    2.31    0.91
  10  -5  -5    2.93    1.30
  10  -5  -5   16.70   22.38
 -10   5   6   36.72    2.64
 -10   5   6   39.20    2.96
 -10   5   6   39.92    5.93
 -10   5   6   43.38    5.80
  10  -5  -6   38.41    2.78
  10  -5  -6   45.78    3.17
  10  -5  -6   42.48    5.57
  10  -5  -6   58.30   23.29
 -10   5   7   37.89    2.68
 -10   5   7   38.85    3.01
 -10   5   7   34.42    5.84
 -10   5   7   42.53    5.71
  10  -5  -7   38.48    2.83
  10  -5  -7   44.13    3.15
  10  -5  -7   46.25    5.65
  10  -5  -7   45.19   20.50
 -10   5   8   74.01    4.61
 -10   5   8   81.94    5.10
 -10   5   8   71.41    8.84
 -10   5   8   78.18    8.52
  10  -5  -8   82.97    4.97
  10  -5  -8   84.14    5.18
 -10   5   9  183.24   10.03
 -10   5   9  186.02   10.38
 -10   5   9  186.60   16.74
 -10   5   9  199.13   16.37
  10  -5  -9  184.54   10.41
  10  -5  -9  206.52   16.44
  10  -5  -9  262.40   32.11
 -10   5  10  168.87    9.57
 -10   5  10  171.17    9.94
 -10   5  10  208.37   16.45
  10  -5 -10  189.16   10.39
  10  -5 -10  199.44   10.79
  10  -5 -10  200.14   16.13
 -10   5  11   66.75    4.50
 -10   5  11   69.70    4.87
 -10   5  11   83.08    9.52
 -10   5  11   82.34    8.62
  10  -5 -11   76.14    4.86
  10  -5 -11   85.18    5.34
  10  -5 -11   90.04    8.76
  10  -5 -11   90.75   21.76
 -10   5  12   97.97    6.00
 -10   5  12  100.92    6.52
 -10   5  12  121.29   12.01
  10  -5 -12  111.27    6.48
  10  -5 -12  111.65    6.73
  10  -5 -12  136.00   23.79
 -10   5  13  160.73    9.15
 -10   5  13  165.02    9.76
 -10   5  13  174.46   15.12
  10  -5 -13  170.65    9.54
  10  -5 -13  184.69   10.28
  10  -5 -13  190.91   15.58
  10  -5 -13  204.54   31.29
 -10   5  14  104.38    6.39
 -10   5  14  113.13    7.19
 -10   5  14  117.74   12.24
 -10   5  14  120.50   11.36
  10  -5 -14  110.45    6.66
  10  -5 -14  127.83   11.63
  10  -5 -14  112.58   22.99
 -10   5  15   53.76    6.92
  10  -5 -15   50.91    3.77
  10  -5 -15   57.36    7.23
 -10   5  16   39.16    3.68
 -10   5  16   44.69    6.08
  10  -5 -16   43.48    3.41
  10  -5 -16   41.66    6.36
  10  -5 -16   11.34   11.11
 -10   6   1   29.48    4.82
 -10   6   1   32.66    8.81
  10  -6  -1   35.63    5.28
  10  -6  -1   50.90    9.83
 -10   6   2   63.40    7.61
 -10   6   2   62.64    9.91
  10  -6  -2   77.29    8.10
  10  -6  -2   63.64   14.45
 -10   6   3  121.52   12.01
 -10   6   3  128.09   13.50
  10  -6  -3  130.89    6.92
  10  -6  -3  147.65   12.65
  10  -6  -3  179.56   26.58
 -10   6   4  381.60   19.57
 -10   6   4  373.36   19.53
 -10   6   4  419.65   31.18
  10  -6  -4  406.56   20.33
  10  -6  -4  400.30   20.24
  10  -6  -4  465.09   31.34
 -10   6   5  198.24   10.57
 -10   6   5  201.14   10.95
 -10   6   5  193.98   17.17
 -10   6   5  223.83   18.35
  10  -6  -5  210.45   11.01
  10  -6  -5  211.42   11.15
  10  -6  -5  233.99   17.85
  10  -6  -5  313.46   46.02
 -10   6   6   43.23    2.82
 -10   6   6   38.15    3.03
 -10   6   6   40.43    5.99
 -10   6   6   43.49    6.23
  10  -6  -6   42.67    2.93
 -10   6   7   34.81    2.53
 -10   6   7   32.59    2.83
 -10   6   7   35.93    5.63
 -10   6   7   34.05    5.54
  10  -6  -7   36.37    2.72
  10  -6  -7   39.82    3.04
  10  -6  -7   44.53    5.45
  10  -6  -7   59.31   31.80
 -10   6   8  133.68    7.49
 -10   6   8  126.28    7.71
 -10   6   8  145.64   13.40
  10  -6  -8  143.95    7.89
  10  -6  -8  140.59    7.93
  10  -6  -8  202.78   31.65
 -10   6   9   95.47    5.70
 -10   6   9   84.83    5.80
 -10   6   9  112.83   11.10
 -10   6   9  101.37   10.13
  10  -6  -9   99.71    5.88
  10  -6  -9   90.13    5.77
  10  -6  -9  111.04   10.14
  10  -6  -9  191.32   30.07
 -10   6  10   80.76    5.21
 -10   6  10   86.33    5.79
 -10   6  10  111.77   10.98
 -10   6  10  102.62    9.96
  10  -6 -10   90.15    5.58
  10  -6 -10   96.04    5.91
  10  -6 -10  108.55    9.93
  10  -6 -10  186.31   29.27
 -10   6  11   40.32    3.08
 -10   6  11   38.06    3.45
 -10   6  11   59.43    7.46
 -10   6  11   46.04    6.26
  10  -6 -11   51.65    3.61
  10  -6 -11   48.79    3.61
  10  -6 -11   59.85    6.49
  10  -6 -11   55.95   22.02
 -10   6  12    0.16    0.74
 -10   6  12   -0.95    1.21
 -10   6  12   -0.34    2.08
 -10   6  12    0.85    1.17
  10  -6 -12    1.16    1.05
  10  -6 -12    2.40    1.11
  10  -6 -12   -1.29    1.23
  10  -6 -12   -7.87   17.37
 -10   6  13    2.74    0.87
 -10   6  13   -1.30    2.64
 -10   6  13    1.82    1.65
  10  -6 -13    2.59    1.33
  10  -6 -13    3.05    1.69
  10  -6 -13  -13.69   18.82
 -10   6  14    2.49    0.91
 -10   6  14    2.65    1.56
 -10   6  14    2.26    2.81
 -10   6  14    1.21    1.59
  10  -6 -14    1.58    1.02
  10  -6 -14    0.71    1.64
  10  -6 -14    9.84   15.47
 -10   6  15   54.76    3.95
 -10   6  15   60.58    4.82
 -10   6  15   67.51    7.66
  10  -6 -15   62.40    4.56
  10  -6 -15   70.14    7.81
 -10   6  16   86.10    6.06
 -10   6  16   80.41    9.09
  10  -6 -16   90.68    5.76
  10  -6 -16   90.30    9.67
  10  -6 -16   55.60   13.92
 -10   7   1  399.50   30.37
 -10   7   1  416.62   35.13
  10  -7  -1  434.84   31.78
  10  -7  -1  480.57   37.79
 -10   7   2  144.72   13.31
 -10   7   2  148.75   17.12
  10  -7  -2  159.15   14.00
  10  -7  -2  145.62   21.99
 -10   7   3   46.50    6.44
 -10   7   3   48.15    9.21
  10  -7  -3   57.75    6.89
  10  -7  -3   70.34   24.48
 -10   7   4  111.07    6.09
 -10   7   4  112.35    6.39
 -10   7   4  123.69   11.66
 -10   7   4  136.81   13.79
  10  -7  -4  143.12   12.18
  10  -7  -4  167.05   36.86
 -10   7   5   80.08    4.64
 -10   7   5   79.22    5.01
 -10   7   5   86.34    9.23
 -10   7   5   97.94   10.73
  10  -7  -5   89.81    5.05
  10  -7  -5   79.80    4.83
  10  -7  -5   96.85    9.35
  10  -7  -5  128.97   36.35
 -10   7   6    2.41    0.61
 -10   7   6    0.96    1.00
 -10   7   6    2.88    1.92
 -10   7   6    0.16    2.52
  10  -7  -6    1.54    0.81
  10  -7  -6    2.02    0.92
  10  -7  -6    3.13    1.55
  10  -7  -6   -9.77   32.60
 -10   7   7    4.29    0.83
 -10   7   7    2.24    1.27
 -10   7   7    6.43    2.46
  10  -7  -7    4.83    1.05
  10  -7  -7    3.61    1.15
  10  -7  -7   11.43   32.40
 -10   7   8   17.21    1.61
 -10   7   8   20.96    4.11
 -10   7   8   19.08    4.13
  10  -7  -8   12.52    1.68
  10  -7  -8   11.31    1.77
  10  -7  -8   21.62    3.57
  10  -7  -8   18.15   27.58
 -10   7   9   32.25    2.93
 -10   7   9   29.32    5.05
  10  -7  -9   27.85    2.49
  10  -7  -9   33.49    2.76
  10  -7  -9   31.48    4.83
 -10   7  10   54.06    3.73
 -10   7  10   63.96    4.57
 -10   7  10   60.75    8.10
 -10   7  10   62.26    7.52
  10  -7 -10   62.06    4.18
  10  -7 -10   64.94    4.35
  10  -7 -10   66.78    7.37
  10  -7 -10   58.47   25.55
 -10   7  11  137.85    8.08
 -10   7  11  138.96    8.73
 -10   7  11  167.77   15.18
 -10   7  11  157.17   14.01
  10  -7 -11  171.80    9.35
  10  -7 -11  171.49   14.16
  10  -7 -11  220.97   33.69
 -10   7  12  150.92    8.79
 -10   7  12  160.86    9.72
 -10   7  12  182.60   16.28
 -10   7  12  171.57   14.96
  10  -7 -12  169.13    9.48
  10  -7 -12  180.14    9.86
  10  -7 -12  186.19   15.16
  10  -7 -12  270.83   37.34
 -10   7  13  126.32    7.61
 -10   7  13  144.35    8.86
 -10   7  13  162.35   14.95
 -10   7  13  156.85   13.56
  10  -7 -13  138.22    8.17
  10  -7 -13  159.05    8.84
  10  -7 -13  147.49   13.16
  10  -7 -13  216.27   33.80
 -10   7  14   39.76    3.14
 -10   7  14   42.84    3.86
 -10   7  14   48.89    7.33
 -10   7  14   49.94    6.22
  10  -7 -14   42.24    3.36
  10  -7 -14   56.40   22.62
 -10   7  15   30.49    2.56
 -10   7  15   32.77    4.92
  10  -7 -15   22.54    2.71
  10  -7 -15   31.67    4.99
  10  -7 -15   14.63   15.06
 -10   7  16   67.02    5.19
 -10   7  16   69.72    8.07
  10  -7 -16   85.70    5.38
  10  -7 -16   25.45   11.22
 -10   8   1    8.44    2.49
 -10   8   1   -0.44   11.90
  10  -8  -1    8.22    3.36
  10  -8  -1    6.80    9.22
 -10   8   2    2.03    1.49
 -10   8   2    3.86    9.37
  10  -8  -2    3.56    2.51
  10  -8  -2   -2.97   12.64
 -10   8   3   19.16    3.84
 -10   8   3   18.94    8.46
  10  -8  -3   20.19    4.25
  10  -8  -3   30.16   21.02
 -10   8   4   87.21    9.62
 -10   8   4   82.01   12.18
  10  -8  -4  107.66   10.27
  10  -8  -4  109.88   31.19
 -10   8   5   11.45    1.03
 -10   8   5   10.32    1.60
 -10   8   5   11.60    3.16
 -10   8   5   14.84    5.88
  10  -8  -5   11.93    1.23
  10  -8  -5   14.64   34.25
 -10   8   6    7.83    0.94
 -10   8   6    9.50    2.88
 -10   8   6    5.44    4.16
  10  -8  -6    7.19    1.29
  10  -8  -6    6.71    2.57
  10  -8  -6    9.37   38.75
 -10   8   7  126.59    7.23
 -10   8   7  140.84    8.19
 -10   8   7  134.30   13.16
 -10   8   7  150.41   14.29
  10  -8  -7  137.42    7.72
  10  -8  -7  163.79   13.42
  10  -8  -7  231.49   46.19
 -10   8   8  247.23   13.05
 -10   8   8  229.49   13.13
 -10   8   8  268.37   21.57
  10  -8  -8  250.56   13.37
  10  -8  -8  266.17   13.88
  10  -8  -8  299.27   21.49
 -10   8   9  139.36    7.94
 -10   8   9  126.36    8.27
 -10   8   9  158.51   14.51
 -10   8   9  170.09   14.62
  10  -8  -9  161.76    8.86
  10  -8  -9  152.92    8.60
  10  -8  -9  163.33   13.76
  10  -8  -9  214.03   41.62
 -10   8  10  154.18    8.81
 -10   8  10  160.25    9.79
 -10   8  10  182.12   16.09
 -10   8  10  184.69   15.64
  10  -8 -10  155.02    9.01
  10  -8 -10  174.35    9.66
  10  -8 -10  198.65   15.47
  10  -8 -10  282.48   41.14
 -10   8  11  110.47    6.65
 -10   8  11  142.07   13.26
  10  -8 -11  115.38    7.10
  10  -8 -11  125.63    7.34
  10  -8 -11  140.32   12.07
  10  -8 -11  192.60   38.50
 -10   8  12   31.04    3.38
 -10   8  12   40.33    5.87
  10  -8 -12   42.81    3.29
  10  -8 -12   45.18    5.75
 -10   8  13   13.30    1.61
 -10   8  13    8.96    2.17
 -10   8  13   21.13    4.53
 -10   8  13   13.90    3.27
  10  -8 -13    9.56    1.75
  10  -8 -13   13.64    1.96
  10  -8 -13   13.77    3.16
  10  -8 -13   29.39   21.41
 -10   8  14    6.66    1.90
 -10   8  14    7.48    3.76
 -10   8  14    8.11    2.58
  10  -8 -14    5.16    1.46
  10  -8 -14   10.27    2.60
  10  -8 -14   13.75   20.18
 -10   8  15    0.41    0.84
 -10   8  15    0.56    1.45
  10  -8 -15    0.43    1.09
  10  -8 -15    1.75    1.54
  10  -8 -15    0.34   13.37
 -10   8  16   -0.85    1.25
  10  -8 -16    0.67    1.22
  10  -8 -16    0.24    1.39
  10  -8 -16   -0.02    3.91
 -10   9   1  109.00   10.89
 -10   9   1   88.95   21.58
  10  -9  -1  115.38   11.89
  10  -9  -1  149.63   19.99
 -10   9   2   84.37    9.35
 -10   9   2   80.56   17.30
  10  -9  -2  103.24   10.47
  10  -9  -2  139.18   23.22
 -10   9   3  118.82   11.82
 -10   9   3  128.47   18.40
  10  -9  -3  135.58   12.66
  10  -9  -3  154.70   32.31
 -10   9   4  134.25   13.14
 -10   9   4  141.87   17.90
  10  -9  -4  163.25   14.06
  10  -9  -4  203.54   40.17
 -10   9   5   61.78    7.75
 -10   9   5   67.55   11.12
  10  -9  -5   66.86    7.96
  10  -9  -5  117.59   42.99
 -10   9   6   42.90    2.72
 -10   9   6   41.07    3.39
 -10   9   6   45.32    6.51
 -10   9   6   53.85    8.83
  10  -9  -6   47.40    3.05
  10  -9  -6   39.31    2.85
  10  -9  -6   55.03    6.48
 -10   9   7  104.46    5.93
 -10   9   7   96.80    6.43
 -10   9   7  117.93   11.52
 -10   9   7  105.89   12.49
  10  -9  -7  112.73    6.41
  10  -9  -7  106.19    6.27
  10  -9  -7  122.98   11.16
  10  -9  -7  156.15   46.57
 -10   9   8  109.43    6.25
 -10   9   8   98.46    6.73
  10  -9  -8  115.97    6.73
  10  -9  -8  110.43    6.59
  10  -9  -8  133.76   11.53
  10  -9  -8  205.35   48.21
 -10   9   9   28.40    2.32
 -10   9   9   35.04    5.74
 -10   9   9   32.53    5.84
  10  -9  -9   29.03    2.74
  10  -9  -9   38.12    5.14
  10  -9  -9   62.31   40.75
 -10   9  10   16.47    1.71
 -10   9  10   15.44    2.42
 -10   9  10   20.58    4.48
  10  -9 -10   17.92    2.10
  10  -9 -10   19.89    2.22
  10  -9 -10   39.95   36.83
 -10   9  11   63.95    4.30
 -10   9  11   74.64    5.62
 -10   9  11   70.87    9.15
 -10   9  11   82.37    8.94
  10  -9 -11   72.68    5.00
  10  -9 -11   76.29    4.96
  10  -9 -11   81.86    8.40
  10  -9 -11   86.60   39.15
 -10   9  12   71.77    4.78
 -10   9  12   85.44    6.16
 -10   9  12  103.70   10.63
 -10   9  12   84.95    9.28
  10  -9 -12   72.69    5.14
  10  -9 -12   89.27    5.55
  10  -9 -12   89.05    8.97
  10  -9 -12   98.43   33.92
 -10   9  13   32.14    2.77
 -10   9  13   31.71    3.67
 -10   9  13   41.57    6.82
 -10   9  13   46.52    6.08
  10  -9 -13   40.81    3.41
  10  -9 -13   44.73    3.44
  10  -9 -13   44.65    5.74
  10  -9 -13   42.41   26.65
 -10   9  14   30.38    2.62
 -10   9  14   23.90    3.21
 -10   9  14   35.73    5.28
  10  -9 -14   32.92    3.08
  10  -9 -14   40.00    5.27
  10  -9 -14   32.97   22.80
 -10   9  15   41.02    3.15
 -10   9  15   35.04    3.88
 -10   9  15   53.04    6.35
  10  -9 -15   43.97    3.76
 -10   9  16  129.54   12.45
  10  -9 -16  139.30    8.36
 -10  10   1   34.94    5.27
 -10  10   1   19.40   21.92
  10 -10  -1   31.88    6.38
  10 -10  -1   51.07   14.31
 -10  10   2   73.47    8.25
 -10  10   2   49.17   18.59
  10 -10  -2   74.19    9.10
  10 -10  -2   58.33   18.17
 -10  10   3   37.66    5.69
 -10  10   3   42.15   15.48
  10 -10  -3   42.10    6.46
  10 -10  -3   42.82   21.45
 -10  10   4    9.39    2.86
 -10  10   4   12.63   10.50
  10 -10  -4    9.87    3.38
  10 -10  -4   51.41   29.81
 -10  10   5    0.03    1.17
 -10  10   5    8.19    7.29
  10 -10  -5   -1.55    1.74
  10 -10  -5    0.28   33.19
 -10  10   6    5.85    0.63
 -10  10   6   12.44    2.82
 -10  10   6    7.48    6.05
  10 -10  -6    9.68    2.81
  10 -10  -6   52.26   44.23
 -10  10   7   53.11    7.34
 -10  10   7   57.99    9.72
  10 -10  -7   57.25    3.73
  10 -10  -7   56.47    3.77
  10 -10  -7   58.48    7.26
  10 -10  -7   92.20   48.05
 -10  10   8   75.34    4.48
 -10  10   8   65.23    5.03
 -10  10   8   67.08    8.77
 -10  10   8   81.52   10.64
  10 -10  -8   71.01    4.63
  10 -10  -8   87.61    8.75
  10 -10  -8  133.55   49.87
 -10  10   9  148.62    8.29
 -10  10   9  148.76    9.28
 -10  10   9  153.66   14.62
  10 -10  -9  161.27    9.05
  10 -10  -9  160.53    8.96
  10 -10  -9  163.49   14.19
  10 -10  -9  223.29   51.97
 -10  10  10  141.41    9.16
  10 -10 -10  146.49    8.72
  10 -10 -10  163.14    9.13
  10 -10 -10  177.70   14.47
  10 -10 -10  191.46   49.41
 -10  10  11  112.94    6.71
 -10  10  11  101.95    7.37
 -10  10  11  135.33   13.02
 -10  10  11  119.46   12.35
  10 -10 -11  126.78    7.54
  10 -10 -11  129.35    7.48
  10 -10 -11  127.59   11.67
  10 -10 -11  194.40   47.38
 -10  10  12   19.08    1.92
 -10  10  12   12.13    2.55
 -10  10  12   25.68    4.98
 -10  10  12   22.86    4.51
  10 -10 -12   17.23    2.33
  10 -10 -12   17.05    2.21
  10 -10 -12   25.53    4.00
  10 -10 -12   12.66   30.05
 -10  10  13   43.28    3.35
 -10  10  13   39.66    4.22
 -10  10  13   56.79    7.84
 -10  10  13   50.61    6.84
  10 -10 -13   51.64    4.06
  10 -10 -13   47.56    3.70
  10 -10 -13   60.72    6.70
  10 -10 -13   36.39   28.44
 -10  10  14  109.50    6.65
 -10  10  14  108.65    7.73
 -10  10  14  129.99   11.99
  10 -10 -14  129.92    7.80
 -10  10  15   28.47    2.59
 -10  10  15   22.85    3.06
 -10  10  15   38.16    5.17
  10 -10 -15   27.07    3.02
 -10  11   1   13.15    3.22
  10 -11  -1   14.85   12.57
 -10  11   2   13.10    3.22
 -10  11   2   38.25   19.41
  10 -11  -2   10.94   14.45
 -10  11   3   25.85    4.55
 -10  11   3   21.02   16.11
  10 -11  -3   23.21    5.48
  10 -11  -3   31.84   19.66
 -10  11   4   77.00    8.97
 -10  11   4   88.03   17.63
  10 -11  -4   88.27    9.78
  10 -11  -4  128.99   35.16
 -10  11   5  110.76   11.19
 -10  11   5  109.55   17.32
  10 -11  -5  111.09   11.53
  10 -11  -5  148.18   42.47
 -10  11   6   74.47    8.74
  10 -11  -6  142.54   51.85
 -10  11   7   63.80    3.64
 -10  11   7   58.79    7.75
  10 -11  -7   61.73    3.80
  10 -11  -7   62.43    7.85
  10 -11  -7   75.65   49.79
 -10  11   8   41.80    2.95
 -10  11   8   43.74    4.61
 -10  11   8   55.63    7.19
 -10  11   8   58.56    9.87
  10 -11  -8   60.31    6.88
  10 -11  -8   32.70   53.97
 -10  11   9   71.95    4.41
 -10  11   9   55.98    5.29
 -10  11   9   72.73   10.42
  10 -11  -9   81.91    8.47
 -10  11  10   54.51    3.65
 -10  11  10   44.43    4.69
  10 -11 -10   53.60    4.14
  10 -11 -10   54.12    4.03
  10 -11 -10   62.87    7.12
  10 -11 -10   75.71   43.15
 -10  11  11   36.50    5.88
 -10  11  11   33.34    6.30
  10 -11 -11   25.31    2.75
  10 -11 -11   26.18    2.82
  10 -11 -11   34.56    5.05
  10 -11 -11   -4.94   36.29
 -10  11  12    0.73    0.85
 -10  11  12    0.21    1.93
 -10  11  12   -2.04    2.27
  10 -11 -12    0.19    1.18
  10 -11 -12    2.47    1.49
  10 -11 -12    0.89    1.42
  10 -11 -12  -29.42   29.21
 -10  11  13   11.92    1.60
 -10  11  13   10.69    2.87
 -10  11  13   10.52    3.55
  10 -11 -13   17.76    3.38
 -10  11  14    2.56    1.01
 -10  11  14    1.28    2.06
 -10  11  14    2.81    2.07
  10 -11 -14    3.82    1.82
  10 -11 -14    1.85    6.90
 -10  11  15   -0.10    1.43
  10 -11 -15   -6.95    7.76
 -10  12   1  130.36   11.95
 -10  12   1   78.55   28.64
  10 -12  -1  115.77   12.75
  10 -12  -1  115.93   19.36
 -10  12   2  126.29   30.10
  10 -12  -2  201.82   17.65
  10 -12  -2  194.68   31.80
 -10  12   3   63.41   19.59
  10 -12  -3   62.93    8.49
 -10  12   4   16.26    3.78
 -10  12   4   33.70   15.06
  10 -12  -4   17.66    4.69
 -10  12   5   22.36    4.38
 -10  12   5    7.66   12.92
  10 -12  -5   22.60    4.91
 -10  12   6   11.23   10.65
  10 -12  -6   10.88    3.60
 -10  12   7    2.38    2.39
 -10  12   7    3.66    6.90
  10 -12  -7    1.12    2.23
  10 -12  -7   51.54   53.32
 -10  12   8    1.57    2.05
 -10  12   8    9.69    5.96
  10 -12  -8    0.28    1.89
  10 -12  -8   -0.94   49.41
 -10  12   9   15.16    3.99
 -10  12   9    9.61    6.02
  10 -12  -9   16.94    3.80
  10 -12  -9    8.34   42.06
  10 -12 -10   84.93    9.23
  10 -12 -10   39.33   36.08
  10 -12 -11   69.00    8.05
  10 -12 -11   62.31   32.85
 -10  12  12   51.24    8.28
  10 -12 -12   75.07    7.98
 -10  12  13  103.93   11.25
 -10  12  14  105.00   11.18
 -10  13   1   16.02    3.52
  10 -13  -1   15.85    5.92
  10 -13  -1    4.39    7.64
 -10  13   2    5.85    2.29
 -10  13   2  -15.71   15.42
  10 -13  -2    4.94    4.68
  10 -13  -2    9.51    8.26
 -10  13   3   16.01    3.51
 -10  13   3   15.32   12.75
  10 -13  -3   11.71    4.93
  10 -13  -3   12.10   10.61
 -10  13   4   56.12    7.06
 -10  13   4   40.60   15.53
 -10  13   5   34.59    5.35
 -10  13   5   34.31   12.51
  10 -13  -5   31.01    6.21
  10 -13  -5   29.31   22.26
 -10  13   6   20.52    4.02
 -10  13   6   13.31    9.96
  10 -13  -6   15.65    4.50
  10 -13  -6   15.08   25.64
 -10  13   7   35.85    5.82
 -10  13   7   30.50    9.74
  10 -13  -7   44.25    6.44
  10 -13  -7   10.60   31.59
  10 -13  -8   98.54   39.03
  10 -13  -9   86.55    9.57
  10 -13  -9   73.74   34.35
 -10  13  10   62.01    9.31
 -10  13  11   62.91    9.15
 -10  13  12   28.46    5.94
 -10  13  13    9.43    3.65
  10 -13 -13    5.09    6.30
 -10  14   1    6.16    7.05
  10 -14  -1   22.90    6.39
  10 -14  -1   15.57    6.55
 -10  14   2   20.01   12.45
 -10  14   3   24.53   12.02
 -10  14   4    5.76    9.56
  10 -14  -4   23.90    5.55
 -10  14   5   11.23    8.44
  10 -14  -5   21.70    5.26
 -10  14   6    7.14    7.66
  10 -14  -6   22.11    5.11
 -10  14   7   52.08   11.79
  10 -14  -7   92.37    9.95
 -10  14   8   19.68    7.63
 -10  14   9    4.36    5.62
  10 -14  -9    1.79    2.24
  10 -14  -9    8.75    9.09
 -10  14  10    1.07    3.16
  10 -14 -10   -1.00    1.82
  10 -14 -10   -0.84    7.57
 -10  14  11   13.65    4.93
  10 -14 -11   10.24    7.29
  10 -15  -5   -0.42    6.12
  10 -15  -6   -3.57    6.32
  10 -15  -7    1.59    6.53
  -9 -18   1   99.40   10.98
   9  18  -1   34.79   13.11
  -9 -17   1   46.16    7.76
   9  17  -1   16.36   34.43
   9  17  -1   45.38    6.32
  -9 -17   2   35.63    6.97
   9  17  -2   23.28   23.90
  -9 -17   3   37.61    6.75
   9  17  -3    2.80    9.91
  -9 -16   1  108.31    6.67
  -9 -16   1  134.93   13.22
   9  16  -1  125.05    6.97
   9  16  -1  106.47   45.96
  -9 -16   2   68.98    4.56
  -9 -16   2   76.41    9.58
   9  16  -2   70.75    4.48
   9  16  -3  -44.59   34.53
   9  16  -3   13.24    3.26
  -9 -16   4   19.63    5.17
   9  16  -4   -0.93   13.72
  -9 -15   1   -0.87    3.07
  -9 -15   1    2.09    2.85
   9  15  -1    0.49    1.10
   9  15  -1   57.81   40.20
   9  15  -1    1.01    1.31
  -9 -15   2    0.44    1.03
  -9 -15   2    2.42    3.03
  -9 -15   2    1.58    2.51
   9  15  -2    0.88    0.86
   9  15  -2    0.46    1.12
   9  15  -2   -4.52   43.45
   9  15  -2   -0.08    1.23
  -9 -15   3   28.33    2.56
  -9 -15   3   24.74    5.97
   9  15  -3   35.98    2.69
   9  15  -3  -13.68   41.53
   9  15  -3   29.45    4.92
  -9 -15   4   35.84    6.48
   9  15  -4   -4.99   33.54
   9  15  -4   33.09    5.20
  -9 -15   5   13.69    4.80
   9  15  -5   10.21   14.57
  -9 -15   6   30.54    5.65
   9  15  -6   -1.66    6.13
  -9 -14   1   92.34    5.60
  -9 -14   1   83.68   10.15
   9  14  -1   96.02    5.55
   9  14  -1  118.62   41.81
  -9 -14   2  171.45    9.46
  -9 -14   2  161.97   15.64
  -9 -14   2  192.57   16.22
   9  14  -2  172.09    9.26
   9  14  -2   94.78   45.70
   9  14  -2  165.33   14.82
  -9 -14   3  118.13    6.96
  -9 -14   3  122.89   12.03
   9  14  -3  124.85   50.54
   9  14  -3  124.37   11.74
  -9 -14   4   80.27    5.18
  -9 -14   4   98.27   10.73
   9  14  -4  101.00    5.73
   9  14  -4   91.65   46.26
   9  14  -4   83.80    9.35
  -9 -14   5   51.55    3.78
  -9 -14   5   59.83    8.03
   9  14  -5   51.27    3.60
   9  14  -5   32.68   34.61
   9  14  -5   50.57    6.67
  -9 -14   6    5.34    3.58
   9  14  -6  -20.66   21.60
   9  14  -6    4.14    1.94
  -9 -14   7   10.31    4.38
   9  14  -7    8.71   12.51
  -9 -13   1   96.91    5.68
  -9 -13   1   86.62   10.16
  -9 -13   1   95.23   10.27
   9  13  -1   82.41    5.11
   9  13  -1   92.93   36.86
   9  13  -1   91.17    9.49
  -9 -13   2   91.10    5.62
  -9 -13   2   96.31   10.78
  -9 -13   2  104.20   10.59
   9  13  -2   99.84    5.77
  -9 -13   3   14.10    1.76
  -9 -13   3   14.18    4.38
  -9 -13   3   18.62    3.82
   9  13  -3   14.36    1.64
   9  13  -3   -3.63   40.30
   9  13  -3   14.58    3.39
   9  13  -4   -7.94   38.12
   9  13  -4   10.70    2.86
  -9 -13   5   17.52    2.03
  -9 -13   5   17.58    5.03
   9  13  -5   20.93    2.04
   9  13  -5   -2.88   39.57
   9  13  -5   23.50    4.04
  -9 -13   6   10.65    1.76
  -9 -13   6   10.41    4.26
   9  13  -6   11.19    1.64
   9  13  -6    5.31   43.19
   9  13  -6   11.91    2.98
  -9 -13   7   30.54    6.28
   9  13  -7    6.99   29.82
   9  13  -7   25.96    4.55
  -9 -13   8   49.99    7.62
   9  13  -8   38.84   15.43
  -9 -12   1   59.00    3.92
  -9 -12   1   64.66    4.13
  -9 -12   1   55.32    7.74
  -9 -12   1   66.70    7.97
   9  12  -1   65.74    4.03
   9  12  -1   50.74    4.05
   9  12  -1   85.25   29.62
   9  12  -1   62.48    7.33
  -9 -12   2   89.09   10.13
  -9 -12   2   94.86    9.88
   9  12  -2   96.18   33.86
   9  12  -2   89.45    9.44
  -9 -12   3   73.78    4.75
  -9 -12   3   76.98    9.42
  -9 -12   3   81.70    8.88
   9  12  -3   79.52    4.82
   9  12  -3   65.16   40.26
   9  12  -3   82.00    8.68
  -9 -12   4  270.72   14.37
  -9 -12   4  292.60   23.22
   9  12  -4  285.69   14.73
   9  12  -4  208.16   52.19
  -9 -12   5  183.71   10.43
   9  12  -5  221.15   11.49
   9  12  -5  225.13   57.04
   9  12  -5  217.41   17.43
  -9 -12   6   30.89    2.68
  -9 -12   6   33.63    6.09
  -9 -12   6   34.25    5.24
   9  12  -6   38.50    2.87
   9  12  -6   58.30   47.85
   9  12  -6   34.80    5.26
  -9 -12   7   12.17    1.87
  -9 -12   7   15.55    4.24
   9  12  -7   12.53    1.66
   9  12  -7  101.66   53.09
   9  12  -7   11.38    3.15
  -9 -12   8   57.66    8.68
   9  12  -8   55.28   37.18
   9  12  -8   62.98    7.48
  -9 -12   9   51.38    6.98
   9  12  -9    9.22    9.71
  -9 -11   1  314.09   16.62
  -9 -11   1  302.56   16.23
  -9 -11   1  343.05   26.05
  -9 -11   1  349.82   25.99
   9  11  -1  320.36   16.62
   9  11  -1  335.39   17.55
   9  11  -1  366.80   46.05
   9  11  -1  356.88   25.78
  -9 -11   2  288.52   14.74
  -9 -11   2  268.67   14.10
  -9 -11   2  285.03   22.29
  -9 -11   2  263.57   21.32
   9  11  -2  292.54   14.70
   9  11  -2  247.18   13.92
   9  11  -2  324.29   47.52
   9  11  -2  256.42   20.93
  -9 -11   3   40.73    2.92
  -9 -11   3   38.13    2.89
  -9 -11   3   41.22    6.32
  -9 -11   3   39.36    5.58
   9  11  -3   34.78    2.74
   9  11  -3   35.22    3.16
   9  11  -3   45.90   33.50
   9  11  -3   34.76    5.34
  -9 -11   4    5.07    1.16
  -9 -11   4    3.10    1.92
   9  11  -4    4.06    1.06
   9  11  -4    3.04    1.77
  -9 -11   5    4.23    1.15
  -9 -11   5    5.96    2.79
  -9 -11   5    4.71    2.21
   9  11  -5    5.04    1.14
   9  11  -5    8.15   40.07
  -9 -11   6   -0.32    1.03
  -9 -11   6    6.50    2.97
   9  11  -6    2.02    1.02
   9  11  -6  -28.71   39.85
   9  11  -6    1.51    1.33
  -9 -11   7    1.43    1.06
  -9 -11   7    1.47    2.49
  -9 -11   7    0.27    1.21
   9  11  -7    0.71    0.85
   9  11  -7   31.79   46.15
   9  11  -7    0.81    1.17
  -9 -11   8   -0.62    1.31
  -9 -11   8    3.11    2.77
   9  11  -8    2.07    1.05
   9  11  -8  -18.39   32.17
   9  11  -8    1.36    1.53
  -9 -11   9   22.73    6.00
   9  11  -9   25.53   25.86
   9  11  -9   36.62    5.25
  -9 -11  10   65.55    7.60
   9  11 -10   13.06    8.56
  -9 -10   1    0.36    0.46
  -9 -10   1    0.18    0.66
  -9 -10   1    2.51    1.99
  -9 -10   1   -0.83    1.41
   9  10  -1   -0.09    0.56
   9  10  -1    0.43    0.77
   9  10  -1   -3.83   15.87
   9  10  -1    0.02    0.77
  -9 -10   2    5.71    0.98
  -9 -10   2    6.96    1.14
  -9 -10   2    4.30    2.60
  -9 -10   2    5.37    2.26
   9  10  -2    4.96    1.01
   9  10  -2    5.20    1.32
   9  10  -2   19.47   25.76
   9  10  -2    6.01    2.09
  -9 -10   3   60.25    3.89
  -9 -10   3   58.22    3.80
  -9 -10   3   55.57    7.57
   9  10  -3   63.11    3.89
   9  10  -3   48.85    3.90
   9  10  -3  107.32   34.11
  -9 -10   4   71.18    4.49
  -9 -10   4   66.45    4.35
  -9 -10   4   73.99    8.69
  -9 -10   4   72.04    8.09
   9  10  -4   77.66    4.66
   9  10  -4   67.93    4.77
   9  10  -4   96.59   38.66
   9  10  -4   80.63    8.25
  -9 -10   5  107.47    6.29
  -9 -10   5  105.44   11.36
  -9 -10   5  111.23   10.73
   9  10  -5  106.02    6.24
   9  10  -5  106.77   45.02
   9  10  -5  121.52   11.04
  -9 -10   6   24.73    2.23
  -9 -10   6   23.96    4.96
  -9 -10   6   27.87    4.42
   9  10  -6   29.15    2.40
   9  10  -6    3.07   23.86
   9  10  -6   22.72    4.36
  -9 -10   7   64.82    4.33
   9  10  -7   72.35    4.54
   9  10  -7   44.52   34.31
   9  10  -7   70.42    8.00
  -9 -10   8  210.31   11.61
  -9 -10   8  224.00   19.26
  -9 -10   8  212.75   18.06
   9  10  -8  253.79   12.87
   9  10  -8  250.32   52.23
   9  10  -8  239.07   18.97
  -9 -10   9  100.43    6.18
  -9 -10   9  104.57   11.19
   9  10  -9  106.59    6.26
   9  10  -9  149.61   44.27
   9  10  -9  109.20   10.82
  -9 -10  10   37.81    6.39
   9  10 -10   19.23   22.61
   9  10 -10   38.60    5.79
  -9 -10  11   45.69    5.98
   9  10 -11    7.81    6.06
  -9  -9   1  162.11    8.71
  -9  -9   1  166.24   14.34
  -9  -9   1  143.90   13.45
   9   9  -1  145.52    8.52
   9   9  -1  164.18   26.55
   9   9  -1  155.86   13.60
  -9  -9   2  265.35   13.38
  -9  -9   2  222.23   12.04
  -9  -9   2  236.30   19.54
  -9  -9   2  229.30   18.90
   9   9  -2  238.17   12.42
   9   9  -2  216.43   12.26
   9   9  -2  231.22   35.59
   9   9  -2  273.31   19.92
  -9  -9   3  270.13   13.98
  -9  -9   3  260.86   21.33
  -9  -9   3  267.50   20.98
   9   9  -3  258.47   13.62
   9   9  -3  272.09   42.83
   9   9  -3  278.03   21.21
  -9  -9   4  182.72   15.21
   9   9  -4  174.72    9.14
   9   9  -4  136.23    8.52
   9   9  -4  206.89   38.41
  -9  -9   5   83.65    5.11
  -9  -9   5   84.21    5.11
  -9  -9   5   90.43    9.63
  -9  -9   5   82.88    8.89
   9   9  -5  121.00   30.45
   9   9  -5   87.44    9.06
  -9  -9   6   75.89    4.62
  -9  -9   6   70.21    4.44
  -9  -9   6   80.18    8.82
  -9  -9   6   70.92    7.92
   9   9  -6   70.74    4.47
   9   9  -6   72.89   29.99
   9   9  -6   64.13    7.86
  -9  -9   7   12.26    1.66
  -9  -9   7   16.56    3.65
  -9  -9   7   12.06    2.98
   9   9  -7   11.61    1.56
   9   9  -7    7.18   23.82
   9   9  -7   11.29    3.12
  -9  -9   8    6.78    1.49
   9   9  -8    7.78    1.36
   9   9  -8  -20.90   24.42
   9   9  -8    6.81    2.46
  -9  -9   9    8.97    1.61
  -9  -9   9   11.87    3.41
  -9  -9   9    8.76    2.72
   9   9  -9   11.61    1.55
   9   9  -9    1.38   26.59
   9   9  -9   10.60    3.03
  -9  -9  10   22.11    2.41
  -9  -9  10   20.00    4.69
   9   9 -10   24.90    2.26
   9   9 -10    8.35   26.39
   9   9 -10   22.11    4.51
  -9  -9  11   40.55    6.23
   9   9 -11   19.56   13.09
   9   9 -11   36.99    5.86
  -9  -9  12    6.84    3.27
   9   9 -12    1.30    3.36
  -9  -8   1   28.74    2.27
  -9  -8   1   27.64    2.25
  -9  -8   1   35.68    5.08
   9   8  -1   28.99    2.21
   9   8  -1   26.37    2.47
   9   8  -1   40.80   15.87
  -9  -8   2   41.17    3.00
  -9  -8   2   42.80    3.05
  -9  -8   2   52.27    6.59
  -9  -8   2   44.40    5.95
   9   8  -2   46.49    3.10
   9   8  -2   55.26    3.75
   9   8  -2   50.91   20.26
   9   8  -2   46.05    5.95
  -9  -8   3  127.95    7.37
  -9  -8   3  137.35    7.56
  -9  -8   3  160.45   13.42
  -9  -8   3  132.25   12.25
   9   8  -3  143.61    7.70
   9   8  -3  131.15    7.76
   9   8  -3  121.31   26.89
   9   8  -3  130.63   12.24
  -9  -8   4    0.53    0.92
  -9  -8   4    0.56    0.96
   9   8  -4    0.81    0.80
   9   8  -4    2.15   16.17
   9   8  -4    0.30    0.84
  -9  -8   5   70.48    4.36
  -9  -8   5   68.52    4.28
  -9  -8   5   59.09    7.95
   9   8  -5   71.09    4.35
   9   8  -5   67.68    4.67
   9   8  -5   68.56   22.42
  -9  -8   6   76.40    4.60
  -9  -8   6   69.20    4.40
   9   8  -6   72.70    4.51
   9   8  -6   59.39    4.51
   9   8  -6   83.78   24.75
   9   8  -6   74.25    8.07
  -9  -8   7   76.45    4.63
  -9  -8   7   66.40    4.36
  -9  -8   7   71.36    7.91
   9   8  -7   70.93    4.48
   9   8  -7   70.87    8.11
  -9  -8   8   62.39    4.06
  -9  -8   8   61.93    4.06
  -9  -8   8   63.53    7.95
   9   8  -8   65.61    4.21
   9   8  -8   91.23   27.08
  -9  -8   9   85.09    5.11
  -9  -8   9   76.36    9.28
  -9  -8   9   83.21    8.79
   9   8  -9   77.15   27.87
   9   8  -9   84.13    9.21
  -9  -8  10  140.43    8.04
  -9  -8  10  127.88   13.20
   9   8 -10  157.43    8.47
   9   8 -10  147.30   36.10
   9   8 -10  148.43   13.71
  -9  -8  11  123.98   12.26
   9   8 -11  102.16   26.66
   9   8 -11  126.09   12.52
  -9  -8  12   39.05    5.92
   9   8 -12    7.20    9.45
  -9  -7   1  120.28    6.48
  -9  -7   1  106.25    6.01
  -9  -7   1  101.70   10.13
   9   7  -1   99.00    5.75
   9   7  -1   99.68    6.13
  -9  -7   2  339.39   16.98
  -9  -7   2  332.54   16.71
  -9  -7   2  311.78   24.32
  -9  -7   2  295.07   23.48
   9   7  -2  272.48   33.41
   9   7  -2  333.08   24.47
  -9  -7   3  441.88   21.63
  -9  -7   3  394.21   20.16
  -9  -7   3  401.61   29.84
  -9  -7   3  366.88   28.53
   9   7  -3  429.82   21.16
   9   7  -3  399.11   20.70
  -9  -7   4  232.44   12.39
  -9  -7   4  233.96   12.33
  -9  -7   4  241.44   19.51
  -9  -7   4  231.05   18.79
   9   7  -4  264.54   13.22
   9   7  -4  221.07   12.39
   9   7  -4  240.14   29.84
   9   7  -4  247.74   19.30
  -9  -7   5  290.08   14.73
  -9  -7   5  272.89   21.95
  -9  -7   5  263.00   21.15
   9   7  -5  297.16   14.95
   9   7  -5  253.71   32.12
   9   7  -5  270.08   21.47
  -9  -7   6  174.70    9.33
  -9  -7   6  154.21    8.67
  -9  -7   6  181.73   15.23
   9   7  -6  173.68    9.23
   9   7  -6  148.91    8.95
   9   7  -6  164.73   26.67
  -9  -7   7   84.87    4.99
  -9  -7   7   75.51    4.76
  -9  -7   7   88.60    9.16
  -9  -7   7   81.39    8.48
   9   7  -7   78.96    4.84
   9   7  -7   67.22    4.83
   9   7  -7   81.88   21.08
   9   7  -7   75.03    8.60
  -9  -7   8   39.73    2.89
  -9  -7   8   44.13    3.11
  -9  -7   8   40.09    5.53
   9   7  -8   43.94    3.03
   9   7  -8   30.97    5.60
  -9  -7   9   83.28    5.34
  -9  -7   9   89.16    5.58
  -9  -7   9  100.28   10.31
   9   7  -9  104.17    5.97
   9   7  -9  119.75   26.21
   9   7  -9  113.58   10.86
  -9  -7  10   33.03    2.60
  -9  -7  10   33.09    2.88
  -9  -7  10   41.96    5.87
  -9  -7  10   33.18    5.14
   9   7 -10   35.51    2.77
   9   7 -10   61.30   24.50
   9   7 -10   34.67    5.68
  -9  -7  11    2.27    1.39
  -9  -7  11    0.86    2.23
   9   7 -11    1.68    0.97
   9   7 -11   -3.16   20.87
  -9  -7  12    4.84    2.41
   9   7 -12    7.13   12.49
   9   7 -12    3.50    2.97
  -9  -7  13   11.05    3.22
   9   7 -13    0.87    4.82
  -9  -6   1  413.57   21.66
  -9  -6   1  443.93   22.42
   9   6  -1  494.61   23.81
   9   6  -1  445.32   22.75
  -9  -6   2  665.86   32.88
  -9  -6   2  655.77   32.47
   9   6  -2  661.96   32.62
   9   6  -2  615.01   31.67
  -9  -6   3  145.63    7.81
  -9  -6   3  119.50    6.97
  -9  -6   3  162.86   13.19
  -9  -6   3  128.46   12.00
   9   6  -3  143.54    7.65
   9   6  -3  128.95    7.58
   9   6  -3  124.60   19.32
   9   6  -3  129.53   12.12
  -9  -6   4    3.95    0.76
  -9  -6   4    4.39    0.99
  -9  -6   4    5.15    1.93
  -9  -6   4    1.94    1.43
   9   6  -4    2.65    0.88
   9   6  -4    1.66    1.09
   9   6  -4    2.97    9.99
   9   6  -4    2.53    1.53
  -9  -6   5   14.87    1.55
  -9  -6   5   18.75    1.78
  -9  -6   5   16.15    3.59
  -9  -6   5   16.87    3.34
   9   6  -5   14.39    1.70
   9   6  -5   17.64    2.12
   9   6  -5   11.16   10.08
   9   6  -5   17.22    3.47
  -9  -6   6    0.28    0.93
  -9  -6   6    0.59    1.22
  -9  -6   6   -0.08    0.79
   9   6  -6    0.01    0.84
   9   6  -6    2.85   10.50
   9   6  -6   -0.20    1.03
  -9  -6   7    1.78    0.69
  -9  -6   7    1.93    1.06
  -9  -6   7    2.28    1.70
   9   6  -7    1.39    0.93
   9   6  -7    1.84    1.11
   9   6  -7    0.50    8.77
   9   6  -7    3.43    1.66
  -9  -6   8   42.13    3.00
  -9  -6   8   42.29    6.03
  -9  -6   8   40.04    5.64
   9   6  -8   39.90    3.29
   9   6  -8   56.16   14.98
   9   6  -8   43.40    6.10
  -9  -6   9   16.30    1.88
  -9  -6   9   15.33    3.73
  -9  -6   9   16.64    3.47
   9   6  -9   17.80    1.83
   9   6  -9   19.96   14.36
   9   6  -9   16.16    3.80
  -9  -6  10   49.30    3.47
  -9  -6  10   50.75    3.66
  -9  -6  10   56.87    6.87
   9   6 -10   60.03    3.84
   9   6 -10   42.62   17.22
   9   6 -10   53.96    7.42
  -9  -6  11  107.86    6.38
  -9  -6  11   97.06    6.06
  -9  -6  11  123.86   11.19
   9   6 -11  117.05    6.69
   9   6 -11  133.80   12.46
  -9  -6  12   82.32    5.45
  -9  -6  12   92.84    9.75
   9   6 -12   93.41    5.57
   9   6 -12   93.24   23.70
   9   6 -12   80.56   10.25
  -9  -6  13   74.27    8.30
   9   6 -13   46.19   13.01
   9   6 -13   58.39    8.66
  -9  -6  14   75.81    7.32
   9   6 -14   12.28    6.81
  -9  -5   1    7.28    0.98
  -9  -5   1    6.12    1.00
   9   5  -1    7.30    1.00
   9   5  -1    7.06    1.17
  -9  -5   2   10.67    1.20
  -9  -5   2    8.79    1.19
   9   5  -2    8.91    1.18
   9   5  -2   11.92    1.52
  -9  -5   3   30.35    2.27
  -9  -5   3   25.10    4.49
  -9  -5   3   24.59    4.29
   9   5  -3   29.98    2.21
   9   5  -3   29.90    2.51
   9   5  -3    8.30   10.03
   9   5  -3   29.11    4.50
  -9  -5   4  159.70    8.54
  -9  -5   4  153.74    8.25
  -9  -5   4  152.49   13.55
  -9  -5   4  128.21   12.79
   9   5  -4  158.50    8.43
   9   5  -4  164.24    8.90
   9   5  -4  150.52   18.88
  -9  -5   5  196.30   10.41
  -9  -5   5  197.18   10.35
  -9  -5   5  206.33   16.62
  -9  -5   5  169.65   15.47
   9   5  -5  220.88   11.08
   9   5  -5  181.31   10.25
   9   5  -5  183.75   20.69
   9   5  -5  189.44   16.23
  -9  -5   6   50.48    3.48
  -9  -5   6   60.15    3.78
  -9  -5   6   63.16    7.12
  -9  -5   6   48.98    6.59
   9   5  -6   59.90    3.77
   9   5  -6   61.64    4.14
   9   5  -6   52.18   11.97
   9   5  -6   52.33    6.92
  -9  -5   7   51.29    3.44
  -9  -5   7   50.35    6.49
  -9  -5   7   47.67    6.21
   9   5  -7   50.80    3.39
   9   5  -7   37.06   11.00
   9   5  -7   44.94    6.53
  -9  -5   8  262.92   13.83
  -9  -5   8  270.38   14.01
  -9  -5   8  272.37   21.32
  -9  -5   8  265.85   20.83
   9   5  -8  292.02   27.70
   9   5  -8  244.36   20.93
  -9  -5   9  295.16   15.52
  -9  -5   9  315.40   16.29
  -9  -5   9  314.28   23.94
  -9  -5   9  345.66   24.45
   9   5  -9  299.11   15.72
   9   5  -9  280.80   15.55
   9   5  -9  309.66   30.00
   9   5  -9  285.81   23.65
  -9  -5  10  131.16    7.31
  -9  -5  10  121.53    7.07
  -9  -5  10  128.90   12.15
  -9  -5  10  125.56   11.84
   9   5 -10  122.10    7.03
   9   5 -10  142.42   19.97
   9   5 -10  120.92   12.60
  -9  -5  11   46.29    3.38
  -9  -5  11   55.06    3.80
  -9  -5  11   58.37    7.09
  -9  -5  11   66.55    7.06
   9   5 -11   50.04    3.55
   9   5 -11   49.13   15.67
   9   5 -11   47.79    7.64
  -9  -5  12   18.86    2.19
  -9  -5  12   28.21    4.61
   9   5 -12   26.15    2.25
   9   5 -12   24.36   17.19
   9   5 -12   17.01    5.61
  -9  -5  13    2.03    1.91
   9   5 -13   17.47    9.66
   9   5 -13   -0.46    3.18
  -9  -5  14    5.94    2.45
   9   5 -14   -0.47    4.67
  -9  -4   1  244.47   12.59
  -9  -4   1  247.17   12.58
   9   4  -1  235.32   12.21
   9   4  -1  227.81   12.29
  -9  -4   2  267.23   13.96
   9   4  -2  279.30   14.51
  -9  -4   3  289.65   14.56
  -9  -4   3  255.44   13.47
   9   4  -3  289.60   14.45
   9   4  -3  249.67   13.61
  -9  -4   4  280.08   13.87
  -9  -4   4  249.11   12.86
  -9  -4   4  277.50   20.44
  -9  -4   4  243.43   19.43
   9   4  -4  280.42   13.80
   9   4  -4  223.23   12.47
   9   4  -4  227.05   22.11
   9   4  -4  214.30   19.07
  -9  -4   5   95.67    5.54
  -9  -4   5   93.82    5.41
  -9  -4   5  101.89    9.75
   9   4  -5  100.21    5.65
   9   4  -5   79.62    5.30
   9   4  -5   90.95   12.29
  -9  -4   6  103.91    9.71
  -9  -4   6   84.00    9.12
   9   4  -6  101.44    5.66
   9   4  -6   95.97    5.71
   9   4  -6   80.39   12.07
   9   4  -6   76.33    9.33
  -9  -4   7   93.01    5.44
  -9  -4   7   92.62    5.44
  -9  -4   7   82.21    9.12
   9   4  -7  105.11    5.79
   9   4  -7   88.40    5.58
   9   4  -7   83.27    9.74
  -9  -4   8   63.18    4.05
  -9  -4   8   58.13    3.91
  -9  -4   8   75.68    7.80
  -9  -4   8   66.02    7.44
   9   4  -8   63.85    4.05
   9   4  -8   55.45    4.15
  -9  -4   9   22.41    1.95
  -9  -4   9   21.54    2.16
  -9  -4   9   29.95    4.24
  -9  -4   9   19.98    3.88
   9   4  -9   20.43    1.95
   9   4  -9   13.72    1.95
   9   4  -9   22.02    9.16
   9   4  -9   22.65    4.88
  -9  -4  10   13.45    1.47
  -9  -4  10   11.90    1.76
  -9  -4  10   11.01    3.01
   9   4 -10   11.89    1.53
   9   4 -10   15.35    4.36
  -9  -4  11   73.96    4.73
  -9  -4  11   82.41    5.12
  -9  -4  11   76.03    8.89
   9   4 -11   85.51    5.10
   9   4 -11   88.15   15.87
   9   4 -11   78.73   10.16
  -9  -4  12   83.65    5.28
  -9  -4  12   93.23    5.79
  -9  -4  12   92.76    9.85
  -9  -4  12   99.98    9.92
   9   4 -12  110.86   18.66
   9   4 -12  114.16   12.06
  -9  -4  13   63.83    4.40
  -9  -4  13   66.17    7.80
   9   4 -13   61.59    4.15
   9   4 -13   90.72   18.38
   9   4 -14   48.52    8.57
  -9  -4  15   61.59    6.49
   9   4 -15   16.50    6.28
  -9  -3   1   17.09    1.48
  -9  -3   1   15.46    1.46
   9   3  -1   17.86    1.51
   9   3  -1   12.94    1.49
  -9  -3   2    9.07    1.07
  -9  -3   2   10.37    1.21
   9   3  -2    9.58    1.14
   9   3  -2   10.29    1.35
  -9  -3   3   44.87    3.01
   9   3  -3   46.64    3.26
  -9  -3   4   11.20    1.25
  -9  -3   4   13.38    1.47
   9   3  -4   12.82    1.41
   9   3  -4    9.66    1.42
  -9  -3   5   43.86    3.00
  -9  -3   5   50.72    3.24
  -9  -3   5   41.76    5.85
  -9  -3   5   41.51    5.83
   9   3  -5   48.89    3.19
   9   3  -5   43.15    3.22
   9   3  -5   42.58    7.60
   9   3  -5   45.69    6.55
  -9  -3   6   26.83    2.17
  -9  -3   6   30.87    2.39
  -9  -3   6   25.30    4.47
  -9  -3   6   26.93    4.51
   9   3  -6   32.62    2.42
   9   3  -6   28.25    2.45
   9   3  -6   26.11    6.24
   9   3  -6   29.82    5.30
  -9  -3   7  229.74   11.78
  -9  -3   7  209.16   17.43
  -9  -3   7  196.00   17.08
   9   3  -7  220.16   11.73
  -9  -3   8  256.31   13.12
  -9  -3   8  234.56   12.46
  -9  -3   8  246.76   19.48
  -9  -3   8  223.44   18.91
   9   3  -8  231.49   12.36
   9   3  -8  251.26   13.27
  -9  -3   9  183.18    9.47
  -9  -3   9  149.17    8.50
  -9  -3   9  159.49   14.09
  -9  -3   9  143.42   13.74
   9   3  -9  171.39    9.06
   9   3  -9  158.17    9.01
  -9  -3  10  128.70   12.04
  -9  -3  10  117.79   11.79
   9   3 -10  122.99    7.08
   9   3 -10  140.28    7.95
   9   3 -10  151.78   16.11
   9   3 -10  118.60   13.32
  -9  -3  11  148.12    8.43
  -9  -3  11  150.76   13.67
  -9  -3  11  143.44   13.57
   9   3 -11  168.49    8.89
   9   3 -11  156.34   17.87
   9   3 -11  149.01   15.49
  -9  -3  12  125.68    7.24
  -9  -3  12  118.87    7.16
  -9  -3  12  133.50   12.35
  -9  -3  12  125.30   12.22
   9   3 -12  139.78    7.68
   9   3 -12  164.23   18.77
   9   3 -12  143.79   15.09
  -9  -3  13   12.32    1.90
  -9  -3  13   15.64    3.39
  -9  -3  13   14.32    3.47
   9   3 -13   13.49    1.67
   9   3 -13   20.09   10.29
   9   3 -13    7.41    6.22
  -9  -3  14   15.78    2.24
  -9  -3  14   24.02    4.06
   9   3 -14   17.46    1.99
   9   3 -14   25.77    8.49
   9   3 -14   16.78    6.83
  -9  -3  15   31.40    4.79
   9   3 -15   12.63    5.85
  -9  -2   1    3.05    0.65
  -9  -2   1    4.70    0.83
   9   2  -1    4.02    0.76
   9   2  -1    3.39    0.86
  -9  -2   2   47.36    3.05
  -9  -2   2   45.62    2.97
   9   2  -2   48.89    3.06
   9   2  -2   42.83    3.09
  -9  -2   3  253.48   13.31
  -9  -2   3  250.95   13.16
   9   2  -3  286.77   14.22
   9   2  -3  262.88   13.76
  -9  -2   4  500.92   25.05
  -9  -2   4  492.66   24.73
   9   2  -4  491.69   24.75
   9   2  -4  499.67   25.20
  -9  -2   5  201.76   10.84
  -9  -2   5  210.82   11.03
  -9  -2   5  207.25   17.08
  -9  -2   5  221.83   17.57
   9   2  -5  215.67   11.21
   9   2  -5  192.69   10.78
   9   2  -5  214.55   18.38
   9   2  -5  222.76   18.61
  -9  -2   6  334.75   17.67
  -9  -2   6  368.74   18.58
  -9  -2   6  353.11   26.64
   9   2  -6  374.41   18.76
   9   2  -6  375.59   19.03
   9   2  -6  362.48   28.08
  -9  -2   7  111.88    6.47
  -9  -2   7  119.86    6.73
  -9  -2   7  125.34   11.34
  -9  -2   7  116.93   11.27
   9   2  -7  121.30    6.71
   9   2  -7  112.16    6.70
   9   2  -7  120.41   12.51
   9   2  -7  115.26   12.34
  -9  -2   8   93.40    5.52
  -9  -2   8   95.88    5.65
  -9  -2   8   86.40    9.57
   9   2  -8  107.29    5.96
   9   2  -8   90.10    5.67
   9   2  -8  104.80   11.35
  -9  -2   9  101.01    5.97
  -9  -2   9  105.69   10.25
  -9  -2   9   97.31   10.22
   9   2  -9  103.47    6.01
  -9  -2  10    5.11    0.93
  -9  -2  10    3.08    1.31
  -9  -2  10    5.74    1.95
  -9  -2  10    3.28    2.04
   9   2 -10    5.14    1.16
   9   2 -10    2.66    1.14
   9   2 -10    6.09    4.14
   9   2 -10    4.13    4.01
  -9  -2  11    0.15    0.50
  -9  -2  11    0.45    1.03
  -9  -2  11    0.34    1.30
   9   2 -11    0.53    0.93
   9   2 -11   -0.46    1.02
   9   2 -11    2.52    4.79
  -9  -2  12    3.02    0.90
  -9  -2  12    3.55    1.26
  -9  -2  12    4.88    1.83
   9   2 -12    2.76    1.06
   9   2 -12   -3.07    4.97
   9   2 -12    0.65    5.60
  -9  -2  13   19.23    1.87
  -9  -2  13   19.68    3.88
  -9  -2  13   19.34    4.07
  -9  -2  14   77.62    5.20
  -9  -2  14   85.82    9.16
   9   2 -14   89.79    5.37
   9   2 -14   98.33   13.92
   9   2 -15   72.94   11.77
  -9  -2  16   42.77    5.39
   9   2 -16   12.14    5.38
  -9  -1   1   47.54    3.00
   9   1  -1   51.16    3.13
  -9  -1   2  281.17   14.64
  -9  -1   2  290.02   14.78
   9   1  -2  314.31   15.51
   9   1  -2  285.34   14.91
  -9  -1   3  640.25   32.12
  -9  -1   3  637.66   31.96
   9   1  -3  679.27   33.18
   9   1  -3  664.71   32.97
  -9  -1   4    4.89    0.81
  -9  -1   4    5.03    1.06
   9   1  -4    6.78    1.09
   9   1  -4    5.88    1.09
  -9  -1   5    9.44    1.17
  -9  -1   5   11.16    1.42
  -9  -1   5   11.12    2.83
   9   1  -5   11.63    1.35
   9   1  -5   11.90    1.43
   9   1  -5    9.08    4.52
  -9  -1   6    0.42    0.91
  -9  -1   6    0.70    1.07
  -9  -1   6    1.46    1.28
   9   1  -6    1.56    0.75
   9   1  -6    0.67    1.87
   9   1  -6    3.44    3.83
  -9  -1   7    3.35    0.73
  -9  -1   7    2.04    1.07
  -9  -1   7    2.10    1.41
  -9  -1   7    2.76    1.58
   9   1  -7    1.89    0.83
   9   1  -7    2.44    0.92
   9   1  -7    1.41    2.20
   9   1  -7    4.01    3.85
  -9  -1   8   12.84    1.37
  -9  -1   8   14.49    1.66
  -9  -1   8    9.26    2.85
  -9  -1   8    9.36    3.03
   9   1  -8   14.20    1.56
   9   1  -8   13.82    1.63
   9   1  -8   10.36    3.66
   9   1  -8   11.80    5.27
  -9  -1   9   24.15    2.08
  -9  -1   9   31.51    2.57
  -9  -1   9   23.65    4.33
  -9  -1   9   26.94    4.65
   9   1  -9   27.36    2.25
   9   1  -9   30.08    2.65
   9   1  -9   24.62    5.30
   9   1  -9   22.15    7.11
  -9  -1  10   64.15    4.12
  -9  -1  10   67.88    4.30
  -9  -1  10   60.95    7.42
  -9  -1  10   60.09    7.68
   9   1 -10   67.33    4.27
   9   1 -10   72.86    4.67
   9   1 -10   62.60    8.68
   9   1 -10   68.85   10.34
  -9  -1  11  169.29    9.32
  -9  -1  11  165.37    9.27
  -9  -1  11  171.64   14.91
  -9  -1  11  167.52   15.16
   9   1 -11  188.89    9.90
   9   1 -11  179.22    9.96
  -9  -1  12  142.72    8.28
  -9  -1  12  152.10   13.71
  -9  -1  12  167.22   14.52
   9   1 -12  161.74    8.75
  -9  -1  13  152.13    8.47
  -9  -1  13  139.43    8.19
  -9  -1  13  154.41   13.72
  -9  -1  13  143.07   13.85
   9   1 -13  184.21    9.43
  -9  -1  14   62.36    4.40
  -9  -1  14   65.39    7.81
   9   1 -14   75.15    4.63
   9   1 -14   73.37   10.96
   9   1 -14   66.29   13.49
  -9  -1  15   70.82    7.69
   9   1 -15   49.97    9.54
   9   1 -15   45.56   11.31
  -9  -1  16   41.22    5.51
   9   1 -16   18.48    6.56
  -9   0   1   28.59    2.05
  -9   0   1   30.76    2.12
   9   0  -1   30.62    2.11
   9   0  -1   27.08    2.14
  -9   0   2    8.87    1.14
   9   0  -2   11.52    1.20
  -9   0   3  290.27   15.02
  -9   0   3  300.08   15.23
   9   0  -3  291.86   15.03
   9   0  -3  313.26   15.83
  -9   0   4  183.52    9.96
  -9   0   4  190.83   10.14
   9   0  -4  206.31   10.60
   9   0  -4  207.26   10.82
  -9   0   5  489.42   25.01
  -9   0   5  494.57   36.15
  -9   0   5  550.09   37.40
   9   0  -5  542.98   26.55
   9   0  -5  514.16   25.87
   9   0  -5  492.30   36.05
   9   0  -5  513.51   38.22
  -9   0   6  522.11   25.75
  -9   0   6  500.54   25.13
  -9   0   6  499.11   35.96
  -9   0   6  537.44   36.72
   9   0  -6  541.73   26.31
   9   0  -6  510.32   25.60
   9   0  -6  441.72   34.41
   9   0  -6  475.53   36.83
  -9   0   7   43.01    2.95
  -9   0   7   40.93    3.01
  -9   0   7   47.15    6.12
  -9   0   7   45.29    5.88
   9   0  -7   46.47    3.09
   9   0  -7   43.47    3.18
   9   0  -7   40.98    6.02
   9   0  -7   42.78    7.91
  -9   0   8   74.61    4.72
  -9   0   8   86.10    5.16
  -9   0   8   81.89    9.06
  -9   0   8   91.31    9.08
   9   0  -8   85.43    5.06
   9   0  -8   90.23    5.40
   9   0  -8   81.43    9.12
   9   0  -8   82.48   11.31
  -9   0   9  264.04   13.74
  -9   0   9  244.58   20.59
   9   0  -9  261.97   13.89
   9   0  -9  261.25   21.13
   9   0  -9  301.07   24.70
  -9   0  10  190.77   10.65
  -9   0  10  208.94   17.34
   9   0 -10  231.57   11.77
   9   0 -10  204.00   17.74
  -9   0  11  130.83    7.59
  -9   0  11  126.61    7.52
  -9   0  11  132.66   13.08
  -9   0  11  154.98   13.43
   9   0 -11  160.27    8.45
   9   0 -11  147.05    8.35
   9   0 -11  152.94   14.12
   9   0 -11  151.37   17.13
  -9   0  12   39.20    2.92
  -9   0  12   47.84    3.35
   9   0 -12   41.57    3.07
   9   0 -12   39.84    3.45
   9   0 -12   42.21    7.06
   9   0 -12   36.52   10.63
  -9   0  13    2.62    0.84
  -9   0  13    1.77    1.21
  -9   0  13    4.52    1.75
  -9   0  13    2.39    2.03
   9   0 -13    3.84    1.05
   9   0 -13    0.47    3.32
   9   0 -13    5.25    7.92
  -9   0  14    7.33    1.17
  -9   0  14    6.32    1.53
  -9   0  14    5.70    2.59
   9   0 -14    4.47    1.23
   9   0 -14   11.06    9.26
  -9   0  15    9.70    1.65
  -9   0  15   11.15    2.81
   9   0 -15    8.99    1.39
   9   0 -15    2.26    4.10
   9   0 -15    9.35    8.46
  -9   0  16    3.39    1.90
   9   0 -16    4.73    4.23
   9   0 -16   -3.52    6.28
  -9   0  17   47.97    6.01
   9   0 -17   18.97    6.80
  -9   1   1  783.74   38.72
  -9   1   1  754.37   37.84
   9  -1  -1  799.76   39.12
   9  -1  -1  820.66   39.88
  -9   1   2  507.77   25.06
  -9   1   2  471.54   23.99
   9  -1  -2  488.71   24.46
   9  -1  -2  514.41   25.39
  -9   1   3  385.43   19.62
   9  -1  -3  408.21   20.26
  -9   1   4  115.43    6.27
  -9   1   4   98.17    5.72
   9  -1  -4  118.32    6.31
   9  -1  -4  111.61    6.31
  -9   1   5  166.10    9.19
  -9   1   5  175.13    9.48
  -9   1   5  202.53   16.13
  -9   1   5  195.25   15.59
   9  -1  -5  181.64    9.64
   9  -1  -5  182.75    9.82
  -9   1   6  265.64   14.10
  -9   1   6  293.00   22.49
  -9   1   6  308.24   22.51
   9  -1  -6  272.45   14.46
   9  -1  -6  288.13   22.07
   9  -1  -6  282.72   24.25
  -9   1   7   21.00    1.82
  -9   1   7   19.13    1.93
  -9   1   7   20.79    4.07
  -9   1   7   22.09    3.80
   9  -1  -7   21.72    1.86
   9  -1  -7   17.43    1.89
   9  -1  -7   21.76    3.91
   9  -1  -7   23.47    6.86
  -9   1   8    6.60    1.02
  -9   1   8    8.60    1.33
  -9   1   8    5.77    2.41
  -9   1   8    6.82    2.20
   9  -1  -8    6.34    1.08
   9  -1  -8    7.72    1.31
   9  -1  -8    4.90    2.31
   9  -1  -8    6.92    5.63
  -9   1   9   16.83    1.65
  -9   1   9   17.80    1.90
  -9   1   9   20.55    4.04
   9  -1  -9   21.23    1.88
   9  -1  -9   17.44    1.95
   9  -1  -9   20.38    7.28
  -9   1  10    4.13    0.87
  -9   1  10    3.36    1.20
  -9   1  10    3.59    2.17
  -9   1  10    3.20    1.81
   9  -1 -10    4.05    0.99
   9  -1 -10    1.81    1.11
   9  -1 -10    4.12    2.11
   9  -1 -10   -0.91    7.05
  -9   1  11  192.81   10.76
  -9   1  11  204.59   11.17
  -9   1  11  199.37   17.71
  -9   1  11  222.44   17.89
   9  -1 -11  217.23   11.46
   9  -1 -11  215.94   11.64
   9  -1 -11  237.29   18.67
   9  -1 -11  248.41   23.14
  -9   1  12  377.81   19.81
  -9   1  12  385.98   20.35
   9  -1 -12  407.45   20.71
   9  -1 -12  412.61   21.09
   9  -1 -12  469.37   37.01
  -9   1  13  148.20    8.27
  -9   1  13  147.96   13.30
   9  -1 -13  126.76    7.57
   9  -1 -13  159.19   14.46
   9  -1 -13  147.35   20.47
  -9   1  14  111.11    6.41
  -9   1  14  109.92    6.58
  -9   1  14   95.98   10.94
  -9   1  14  117.50   11.25
   9  -1 -14  107.80    6.40
   9  -1 -14  120.97   12.38
   9  -1 -14  123.12   18.63
  -9   1  15   43.38    3.47
   9  -1 -15   42.18    3.15
   9  -1 -15   48.03    7.42
   9  -1 -16   65.26   13.15
  -9   1  17   72.10    7.77
   9  -1 -17   43.96    8.19
  -9   2   1  217.25   11.01
  -9   2   1  194.96   10.36
   9  -2  -1  217.50   10.95
   9  -2  -1  211.12   10.93
  -9   2   2    6.14    0.75
  -9   2   2    4.16    0.89
   9  -2  -2    4.92    0.81
   9  -2  -2    4.48    0.87
  -9   2   3    0.56    0.37
  -9   2   3    1.32    0.75
   9  -2  -3    0.40    0.58
   9  -2  -3    0.02    0.58
  -9   2   4   21.87    1.75
  -9   2   4   23.32    1.89
   9  -2  -4   21.70    1.77
  -9   2   5  105.59    5.98
  -9   2   5  106.68    6.06
  -9   2   5  105.67   10.71
  -9   2   5  108.42   10.43
   9  -2  -5  110.02    6.13
   9  -2  -5  122.14    6.64
   9  -2  -5  109.66   10.44
   9  -2  -5  112.70   13.89
  -9   2   6   67.53    4.23
  -9   2   6   73.69    4.51
  -9   2   6   68.53    8.35
  -9   2   6   82.92    8.26
   9  -2  -6   82.39    4.70
   9  -2  -6   86.60    5.08
   9  -2  -6   71.76    8.03
   9  -2  -6   74.52   11.23
  -9   2   7   58.15    3.67
  -9   2   7   55.70    3.70
  -9   2   7   58.15    7.32
  -9   2   7   61.99    7.00
   9  -2  -7   59.72    3.73
   9  -2  -7   57.86    3.85
   9  -2  -7   61.82    7.02
   9  -2  -7   49.92   10.56
  -9   2   8  273.95   14.67
  -9   2   8  292.93   15.23
  -9   2   8  297.26   23.32
  -9   2   8  309.13   23.14
   9  -2  -8  291.10   15.12
   9  -2  -8  302.74   15.65
   9  -2  -8  303.36   23.02
   9  -2  -8  338.15   27.65
  -9   2   9  380.54   20.08
  -9   2   9  403.85   20.78
  -9   2   9  403.08   30.56
  -9   2   9  449.13   31.29
   9  -2  -9  414.37   21.04
   9  -2  -9  435.22   21.80
   9  -2  -9  446.01   34.96
  -9   2  10  124.91    7.26
  -9   2  10  130.64    7.54
  -9   2  10  131.06   12.85
  -9   2  10  142.61   12.63
   9  -2 -10  133.57    7.59
   9  -2 -10  144.56    8.01
   9  -2 -10  151.56   12.98
   9  -2 -10  142.65   16.58
  -9   2  11  194.92   10.66
  -9   2  11  185.35   10.43
  -9   2  11  194.18   17.23
  -9   2  11  211.45   17.12
   9  -2 -11  221.67   11.42
   9  -2 -11  204.08   17.12
   9  -2 -11  237.32   22.94
  -9   2  12  166.70    9.10
  -9   2  12  153.62    8.86
   9  -2 -12  168.06    9.18
   9  -2 -12  161.25    9.18
   9  -2 -12  182.11   15.28
   9  -2 -12  188.26   21.22
  -9   2  13   28.39    2.38
  -9   2  13   26.65    2.54
  -9   2  13   22.30    5.43
  -9   2  13   29.83    4.86
   9  -2 -13   35.38    2.64
   9  -2 -13   32.36    5.39
  -9   2  14    2.17    0.83
  -9   2  14    1.06    1.10
  -9   2  14    2.35    1.98
  -9   2  14    3.40    1.70
   9  -2 -14    0.64    0.98
   9  -2 -14    1.00    2.68
   9  -2 -14    3.05   11.45
  -9   2  15   26.41    2.27
  -9   2  15   23.06    2.55
  -9   2  15   31.01    4.88
   9  -2 -15   26.62    2.37
   9  -2 -15   25.57    5.29
   9  -2 -15   31.14   14.36
  -9   2  16   20.35    2.51
  -9   2  16   21.21    4.43
   9  -2 -16   26.47    2.37
   9  -2 -16   19.12    4.92
   9  -2 -16   19.08   10.45
   9  -2 -17    0.23    2.21
  -9   3   1    9.43    0.91
  -9   3   1   10.51    1.01
   9  -3  -1    9.90    0.94
   9  -3  -1   11.78    1.10
  -9   3   2  116.26    6.38
  -9   3   2  116.88    6.39
   9  -3  -2  125.76    6.61
   9  -3  -2  132.45    6.96
  -9   3   3  474.10   23.81
   9  -3  -3  489.75   24.37
  -9   3   4  485.57   24.36
  -9   3   4  453.03   23.47
  -9   3   4  484.83   35.12
  -9   3   4  526.08   36.01
   9  -3  -4  484.82   24.32
   9  -3  -4  466.25   23.96
   9  -3  -4  539.18   36.20
   9  -3  -4  527.98   41.32
  -9   3   5  287.60   14.75
  -9   3   5  268.33   14.25
  -9   3   5  309.83   23.19
   9  -3  -5  297.29   15.02
   9  -3  -5  277.74   14.62
   9  -3  -5  333.78   28.21
  -9   3   6  368.55   18.98
  -9   3   6  353.28   18.61
  -9   3   6  385.84   28.83
  -9   3   6  401.47   28.77
   9  -3  -6  381.09   19.35
   9  -3  -6  386.46   19.65
   9  -3  -6  409.37   28.90
   9  -3  -6  421.60   33.69
  -9   3   7  240.40   12.65
  -9   3   7  243.86   20.05
  -9   3   7  257.50   19.87
   9  -3  -7  232.75   12.59
   9  -3  -7  272.62   20.20
   9  -3  -7  246.60   23.47
  -9   3   8  100.95    6.17
  -9   3   8  116.32   11.47
  -9   3   8  118.08   11.01
   9  -3  -8  117.75    6.55
   9  -3  -8  110.79    6.52
   9  -3  -8  127.44   11.19
   9  -3  -8  124.42   15.43
  -9   3   9  138.84    7.72
  -9   3   9  127.03    7.50
  -9   3   9  151.61   13.59
  -9   3   9  145.34   12.90
   9  -3  -9  149.66    8.05
   9  -3  -9  142.87    7.99
   9  -3  -9  154.59   18.18
  -9   3  10   14.43    1.50
  -9   3  10   11.17    1.73
  -9   3  10   13.98    3.58
  -9   3  10   14.47    3.11
   9  -3 -10   12.61    1.53
   9  -3 -10   12.67    1.60
   9  -3 -10   15.36    3.21
   9  -3 -10   11.03    8.30
  -9   3  11    5.32    1.07
  -9   3  11    9.81    1.58
  -9   3  11    8.03    2.92
  -9   3  11    8.34    2.41
   9  -3 -11    8.76    1.30
   9  -3 -11   10.28    1.48
   9  -3 -11    7.17    2.51
   9  -3 -11    7.55    9.71
  -9   3  12   15.75    1.69
  -9   3  12   18.77    2.07
   9  -3 -12   18.77    1.91
   9  -3 -12   17.75    2.05
   9  -3 -12   17.90    3.88
   9  -3 -12   36.27   11.63
  -9   3  13   10.91    1.40
  -9   3  13    9.66    1.67
  -9   3  13    8.20    3.29
  -9   3  13    9.93    2.84
   9  -3 -13    8.34    1.44
   9  -3 -13   11.65    1.67
   9  -3 -13   15.70    3.35
   9  -3 -13   15.38   12.43
  -9   3  14   29.43    2.39
  -9   3  14   26.90    2.60
  -9   3  14   24.33    5.13
  -9   3  14   28.75    4.74
   9  -3 -14   27.80    2.42
   9  -3 -14   28.30    5.10
   9  -3 -14   28.56   13.67
  -9   3  15   87.40    5.26
  -9   3  15   95.09    5.99
  -9   3  15   95.60    9.48
   9  -3 -15   65.29    4.90
   9  -3 -15   94.19    9.82
   9  -3 -15   91.53   18.94
  -9   3  16  125.49    7.47
  -9   3  16  108.21   11.12
   9  -3 -16  122.22    6.95
   9  -3 -16  106.93   11.44
   9  -3 -16   76.08   16.43
  -9   3  17   79.11    8.44
   9  -3 -17   59.41    8.28
  -9   4   1  147.28   12.77
  -9   4   1  147.53   13.80
   9  -4  -1  134.55    7.12
  -9   4   2  135.68    7.24
  -9   4   2  136.80    7.31
  -9   4   2  135.88   12.56
  -9   4   2  139.35   13.19
   9  -4  -2  141.66    7.39
   9  -4  -2  136.07    7.35
   9  -4  -2  165.40   13.27
   9  -4  -2  164.95   19.71
  -9   4   3  260.71   13.60
  -9   4   3  264.75   13.77
  -9   4   3  250.29   20.91
  -9   4   3  270.56   21.78
   9  -4  -3  288.91   14.38
   9  -4  -3  287.12   14.49
   9  -4  -3  321.14   22.61
   9  -4  -3  371.98   33.53
  -9   4   4  535.47   26.59
  -9   4   4  489.08   25.35
  -9   4   4  574.31   39.15
   9  -4  -4  535.91   26.58
   9  -4  -4  507.22   25.93
   9  -4  -4  658.92   49.15
  -9   4   5   62.07    3.97
  -9   4   5   75.15    8.17
  -9   4   5   67.69    7.84
   9  -4  -5   67.57    4.05
   9  -4  -5   78.19    7.85
   9  -4  -5   63.48   15.36
  -9   4   6   15.44    1.51
  -9   4   6   17.25    1.70
  -9   4   6   15.89    3.79
  -9   4   6   21.64    3.69
   9  -4  -6   17.19    1.60
   9  -4  -6   19.86    1.84
   9  -4  -6   20.39    3.53
  -9   4   7   15.29    1.46
  -9   4   7   15.32    1.66
  -9   4   7   13.54    3.59
  -9   4   7   16.46    3.30
   9  -4  -7   15.30    1.53
   9  -4  -7   14.14    1.62
   9  -4  -7   16.52    3.24
   9  -4  -7   12.22    8.71
  -9   4   8   72.13    4.48
  -9   4   8   73.67    4.68
  -9   4   8   76.74    8.88
  -9   4   8   82.53    8.54
   9  -4  -8   78.50    4.71
   9  -4  -8   79.93    4.86
   9  -4  -8   84.63    8.51
   9  -4  -8   98.96   14.76
  -9   4   9  127.76    7.28
  -9   4   9  137.99    7.72
  -9   4   9  132.31   12.96
   9  -4  -9  138.46    7.62
   9  -4  -9  143.83    7.89
   9  -4  -9  155.86   18.59
  -9   4  10  109.10    6.58
  -9   4  10  126.83    7.26
  -9   4  10  126.41   12.46
  -9   4  10  137.37   12.07
   9  -4 -10  131.00    7.27
   9  -4 -10  134.32    7.46
   9  -4 -10  129.18   11.83
   9  -4 -10  126.30   18.35
  -9   4  11  190.07   10.25
  -9   4  11  174.44   10.00
  -9   4  11  191.94   16.86
  -9   4  11  185.83   16.00
   9  -4 -11  186.81   10.21
   9  -4 -11  205.16   10.84
   9  -4 -11  205.51   16.45
   9  -4 -11  231.08   24.18
  -9   4  12  271.59   14.21
  -9   4  12  261.03   14.13
  -9   4  12  264.34   22.09
  -9   4  12  281.35   21.69
   9  -4 -12  263.06   14.03
   9  -4 -12  263.06   14.15
   9  -4 -12  293.81   22.01
   9  -4 -12  344.08   31.24
  -9   4  13  200.36   11.07
  -9   4  13  209.39   11.61
  -9   4  13  195.36   18.11
  -9   4  13  202.50   17.44
   9  -4 -13  231.76   12.06
   9  -4 -13  222.49   11.89
   9  -4 -13  245.89   18.66
   9  -4 -13  286.18   29.57
  -9   4  14  103.81    6.63
  -9   4  14  111.82   11.83
  -9   4  14  119.98   11.30
   9  -4 -14  110.95    6.59
   9  -4 -14  126.78   11.64
   9  -4 -14  156.59   22.44
  -9   4  15   84.49    5.32
  -9   4  15   87.29    5.87
  -9   4  15   97.43   10.61
  -9   4  15   92.36    9.68
   9  -4 -15   94.58    5.72
   9  -4 -15   99.60   10.07
   9  -4 -15  109.06   20.51
  -9   4  16  116.44    7.13
  -9   4  16  103.57   10.75
   9  -4 -16  116.11    6.72
   9  -4 -16  104.09   10.97
   9  -4 -16   82.13   16.54
  -9   4  17   17.63    3.87
   9  -4 -17   16.75    4.15
   9  -4 -17   16.43    8.86
  -9   5   1   25.56    4.23
   9  -5  -1   25.06    8.47
  -9   5   2    3.08    1.83
   9  -5  -2    5.22    0.62
   9  -5  -2    5.18    0.65
   9  -5  -2    9.72   10.09
  -9   5   3  146.03    7.85
  -9   5   3  159.11    8.32
  -9   5   3  140.32   13.44
  -9   5   3  158.56   14.73
   9  -5  -3  162.90    8.36
   9  -5  -3  156.65    8.26
   9  -5  -3  169.28   14.06
   9  -5  -3  188.22   25.41
  -9   5   4  101.25    5.63
  -9   5   4  110.30    6.06
  -9   5   4  101.09   10.46
  -9   5   4  104.88   10.93
   9  -5  -4   98.40    5.59
   9  -5  -4  108.23    5.97
   9  -5  -4  117.24   10.57
   9  -5  -4  110.94   22.40
  -9   5   5  215.42   11.45
  -9   5   5  220.51   11.75
  -9   5   5  233.68   18.96
  -9   5   5  230.11   19.01
   9  -5  -5  222.02   11.66
   9  -5  -5  234.37   12.13
   9  -5  -5  247.66   18.92
   9  -5  -5  312.56   31.38
  -9   5   6  591.98   30.31
  -9   5   6  596.62   30.60
  -9   5   6  610.31   43.99
  -9   5   6  639.46   44.66
   9  -5  -6  636.98   31.60
   9  -5  -6  643.04   31.87
   9  -5  -6  695.30   45.77
   9  -5  -6  769.29   56.38
  -9   5   7  245.99   13.07
  -9   5   7  245.16   13.25
   9  -5  -7  266.93   13.74
   9  -5  -7  261.67   13.63
   9  -5  -7  297.78   21.48
   9  -5  -7  300.18   29.33
  -9   5   8   44.51    3.02
  -9   5   8   43.71    3.22
  -9   5   8   47.93    6.56
  -9   5   8   47.10    6.18
   9  -5  -8   42.96    3.05
   9  -5  -8   45.53    3.20
   9  -5  -8   52.01    6.11
   9  -5  -8   67.05   14.29
  -9   5   9   74.47    4.87
  -9   5   9   83.66    9.30
  -9   5   9   76.67    8.65
   9  -5  -9   81.13    4.90
   9  -5  -9   90.66    8.82
   9  -5  -9   97.45   16.74
  -9   5  10  341.69   18.25
  -9   5  10  347.95   18.67
  -9   5  10  400.18   28.70
   9  -5 -10  393.90   19.78
   9  -5 -10  376.67   19.34
   9  -5 -10  430.88   29.38
  -9   5  11  133.26    7.68
  -9   5  11  148.95   14.02
  -9   5  11  140.13   12.97
   9  -5 -11  142.18    8.07
   9  -5 -11  155.50   13.23
   9  -5 -11  185.91   23.58
  -9   5  12  118.25    6.95
  -9   5  12  110.27    6.97
  -9   5  12  133.35   12.84
  -9   5  12  137.70   12.16
   9  -5 -12  127.17    7.25
   9  -5 -12  134.46   12.01
   9  -5 -12  158.07   22.94
  -9   5  13   28.20    2.41
  -9   5  13   30.66    2.80
  -9   5  13   34.24    5.76
  -9   5  13   30.76    4.89
   9  -5 -13   29.70    2.57
   9  -5 -13   32.74    2.75
   9  -5 -13   33.06    4.97
   9  -5 -13   28.41   15.83
  -9   5  14    9.45    1.47
  -9   5  14   13.07    1.93
  -9   5  14   12.77    3.77
  -9   5  14   11.55    2.92
   9  -5 -14   10.50    1.54
   9  -5 -14   11.00    3.05
   9  -5 -14    6.58   15.25
  -9   5  15   13.90    1.63
  -9   5  15   16.08    2.29
  -9   5  15    9.70    3.91
  -9   5  15   13.10    3.31
   9  -5 -15   12.27    1.73
   9  -5 -15   16.02    3.50
   9  -5 -15   35.06   16.53
  -9   5  16   41.34    3.67
  -9   5  16   43.88    5.96
   9  -5 -16   39.72    3.15
   9  -5 -16   42.84    6.13
   9  -5 -16   26.74   13.40
  -9   5  17   66.30    7.86
  -9   6   1   74.18    8.37
  -9   6   1   70.57   11.68
   9  -6  -1   89.30    9.04
   9  -6  -1   77.64   13.75
  -9   6   2  280.34   22.67
  -9   6   2  279.89   24.61
   9  -6  -2  332.50   24.23
   9  -6  -2  367.78   33.98
  -9   6   3  680.01   33.90
  -9   6   3  658.90   33.46
  -9   6   3  681.58   48.03
  -9   6   3  654.26   48.68
   9  -6  -3  751.97   36.09
   9  -6  -3  759.23   50.20
   9  -6  -3  862.25   68.25
  -9   6   4  297.05   15.12
  -9   6   4  295.22   15.30
  -9   6   4  278.63   23.82
   9  -6  -4  318.18   15.82
   9  -6  -4  295.40   15.21
   9  -6  -4  345.33   24.48
  -9   6   5   48.01    6.17
  -9   6   5   43.91    6.66
   9  -6  -5   38.14    2.75
   9  -6  -5   46.05    5.91
   9  -6  -5   62.49   21.45
  -9   6   6   18.40    1.89
  -9   6   6   25.88    4.46
  -9   6   6   25.91    4.77
   9  -6  -6   22.63    1.89
   9  -6  -6   27.53    4.18
   9  -6  -6   34.85   17.78
  -9   6   7   66.25    4.03
  -9   6   7   59.54    4.10
  -9   6   7   69.16    8.11
  -9   6   7   63.68    8.01
   9  -6  -7   71.13    4.29
   9  -6  -7   66.24    4.16
   9  -6  -7   76.13    7.80
   9  -6  -7   98.50   19.29
  -9   6   8    1.23    0.60
  -9   6   8    3.23    1.87
  -9   6   8    1.93    1.69
   9  -6  -8    2.18    0.89
   9  -6  -8   14.00   13.92
  -9   6   9   10.25    1.29
  -9   6   9    8.90    1.49
  -9   6   9   16.06    3.51
  -9   6   9   11.77    3.05
   9  -6  -9   11.83    1.47
   9  -6  -9    9.13    1.45
   9  -6  -9   16.66    2.98
   9  -6  -9   13.50   13.78
  -9   6  10    2.17    0.85
  -9   6  10    2.19    1.06
  -9   6  10    2.32    1.81
   9  -6 -10    3.93    0.98
   9  -6 -10    3.71    1.18
   9  -6 -10    5.82    1.75
   9  -6 -10    2.66   14.25
  -9   6  11   20.07    1.93
  -9   6  11   24.35    4.85
  -9   6  11   23.32    4.30
   9  -6 -11   23.52    2.20
   9  -6 -11   29.02    2.40
   9  -6 -11   23.71    4.16
   9  -6 -11   47.06   16.16
  -9   6  12  241.73   13.55
  -9   6  12  262.46   21.85
   9  -6 -12  262.16   13.86
   9  -6 -12  269.48   14.22
   9  -6 -12  370.89   35.23
  -9   6  13  328.25   17.90
  -9   6  13  358.51   19.15
  -9   6  13  407.66   30.25
  -9   6  13  387.13   28.22
   9  -6 -13  393.50   19.85
   9  -6 -13  387.03   19.65
  -9   6  14   85.04    5.29
  -9   6  14   80.55    5.60
  -9   6  14   86.93   10.15
  -9   6  14   93.54    9.45
   9  -6 -14   93.01    5.61
   9  -6 -14   91.89    9.38
   9  -6 -14  103.12   23.67
  -9   6  15  158.45    8.97
  -9   6  15  162.43    9.63
  -9   6  15  166.92   15.91
  -9   6  15  165.34   14.62
   9  -6 -15  161.94    9.19
   9  -6 -15  180.79   14.98
   9  -6 -15  202.84   28.44
  -9   6  16   63.15    4.39
  -9   6  16   71.79    5.31
  -9   6  16   83.84    8.57
   9  -6 -16   84.26    8.63
   9  -6 -16   43.63   17.05
  -9   6  17   29.44    3.48
  -9   6  17   40.50    5.66
   9  -6 -17   41.78    3.30
  -9   7   1   69.41    8.07
  -9   7   1   64.66   13.06
   9  -7  -1   80.54    8.75
   9  -7  -1   95.73   15.07
  -9   7   2   58.69    7.02
  -9   7   2   42.83    9.72
   9  -7  -2   58.53    7.33
   9  -7  -2   89.17   18.94
  -9   7   3    7.34    2.25
  -9   7   3    3.37    5.15
   9  -7  -3    4.82    2.51
   9  -7  -3   14.13   19.41
  -9   7   4    0.63    0.33
  -9   7   4    0.68    0.78
  -9   7   4    1.91    1.33
  -9   7   4    2.58    3.77
   9  -7  -4    0.13    0.43
   9  -7  -4    0.24    0.54
   9  -7  -4    1.12    1.48
   9  -7  -4    4.82   22.21
  -9   7   5   67.10    4.01
  -9   7   5   75.85    4.59
  -9   7   5   68.26    8.31
  -9   7   5   68.41    9.50
   9  -7  -5   75.15    4.38
   9  -7  -5   77.47    4.44
   9  -7  -5   78.41    8.38
   9  -7  -5   83.83   30.71
  -9   7   6  107.74    5.99
  -9   7   6  109.95    6.41
  -9   7   6  104.81   10.93
  -9   7   6  104.69   11.70
   9  -7  -6  106.56    6.11
   9  -7  -6  109.86    6.21
   9  -7  -6  124.26   11.11
   9  -7  -6  156.39   30.95
  -9   7   7   12.23    1.24
  -9   7   7    9.90    1.53
  -9   7   7    7.47    3.04
  -9   7   7    9.69    3.54
   9  -7  -7   10.11    1.35
   9  -7  -7   10.44    1.40
   9  -7  -7   10.77    2.84
   9  -7  -7   19.61   20.60
  -9   7   8    8.31    1.10
  -9   7   8    6.23    1.31
  -9   7   8    8.34    2.86
  -9   7   8    7.19    2.94
   9  -7  -8    8.75    1.31
   9  -7  -8    8.60    1.34
   9  -7  -8    9.49    2.50
   9  -7  -8   -1.99   17.07
  -9   7   9  268.80   14.24
  -9   7   9  274.28   14.76
  -9   7   9  270.39   22.52
  -9   7   9  284.08   22.60
   9  -7  -9  275.21   14.59
   9  -7  -9  298.61   15.19
   9  -7  -9  317.76   22.88
  -9   7  10  395.20   20.57
  -9   7  10  391.42   20.85
   9  -7 -10  402.86   21.13
   9  -7 -10  415.25   21.32
   9  -7 -10  473.63   32.05
   9  -7 -10  546.32   47.45
  -9   7  11  126.19    7.58
  -9   7  11  142.60    8.49
  -9   7  11  167.05   14.76
  -9   7  11  163.18   14.02
   9  -7 -11  148.23    8.49
   9  -7 -11  153.87    8.57
   9  -7 -11  164.64   13.73
   9  -7 -11  233.68   29.26
  -9   7  12  125.14    7.53
  -9   7  12  131.11    8.15
  -9   7  12  159.92   14.57
  -9   7  12  158.44   13.70
   9  -7 -12  147.22    8.35
   9  -7 -12  153.62    8.48
   9  -7 -12  165.98   13.62
   9  -7 -12  209.58   28.84
  -9   7  13   89.01    5.54
  -9   7  13   87.11    6.00
  -9   7  13   94.34    9.87
   9  -7 -13   92.90    5.79
   9  -7 -13  102.20    6.07
   9  -7 -13  115.26   10.21
   9  -7 -13   93.75   24.36
  -9   7  14   79.53    5.06
  -9   7  14   76.39    5.59
  -9   7  14   89.40   10.23
  -9   7  14   91.10    9.33
   9  -7 -14   87.68    5.48
   9  -7 -14   84.08    5.39
   9  -7 -14  100.85    9.45
   9  -7 -14   94.44   24.42
  -9   7  15    9.04    1.34
  -9   7  15    8.74    1.94
  -9   7  15   10.27    2.79
   9  -7 -15    7.42    1.54
   9  -7 -15   13.70    2.93
   9  -7 -15   25.75   15.77
  -9   7  16    1.15    1.50
   9  -7 -16    2.71    1.20
   9  -7 -16    1.73    1.55
   9  -7 -16    1.45   13.23
  -9   7  17    5.54    1.88
  -9   7  17    9.51    2.56
   9  -7 -17    5.38    1.42
   9  -7 -17    9.12    2.78
   9  -7 -17   -4.03    9.18
  -9   8   1   98.24   10.40
  -9   8   1  101.33   20.51
   9  -8  -1  125.89   11.65
   9  -8  -1  134.80   17.88
  -9   8   2   86.12    9.30
  -9   8   2   78.18   14.70
   9  -8  -2   94.87    9.91
   9  -8  -2   97.72   20.31
  -9   8   3  138.80   13.05
  -9   8   3  133.75   16.72
   9  -8  -3  153.10   13.68
   9  -8  -3  171.25   28.27
  -9   8   4  175.58    9.19
  -9   8   4  173.89   15.72
  -9   8   4  190.47   19.16
   9  -8  -4  218.17   16.96
   9  -8  -4  270.99   39.87
  -9   8   5  144.28    7.69
  -9   8   5  139.64    7.95
  -9   8   5  137.49   13.38
  -9   8   5  149.54   15.65
   9  -8  -5  153.89    8.11
   9  -8  -5  152.87    8.09
   9  -8  -5  175.89   14.30
   9  -8  -5  229.37   42.11
  -9   8   6  110.11    6.04
  -9   8   6  107.75    6.47
  -9   8   6  112.12   11.16
   9  -8  -6  111.44    6.23
   9  -8  -6  171.54   37.96
  -9   8   7   71.74    4.36
  -9   8   7   73.98    4.88
  -9   8   7   77.67    8.89
  -9   8   7   81.38    9.86
   9  -8  -7   74.55    4.62
   9  -8  -7   89.99    8.83
   9  -8  -7  130.91   34.59
  -9   8   8  153.50    8.41
  -9   8   8  133.93    8.35
  -9   8   8  179.07   15.45
  -9   8   8  171.48   15.84
   9  -8  -8  159.88    8.80
   9  -8  -8  160.12    8.71
   9  -8  -8  181.54   14.65
   9  -8  -8  176.16   36.63
  -9   8   9  138.86    8.02
  -9   8   9  139.83    8.53
  -9   8   9  167.20   14.78
  -9   8   9  149.95   14.55
   9  -8  -9  160.08    8.81
   9  -8  -9  166.14    8.87
   9  -8  -9  181.47   14.46
   9  -8  -9  216.35   33.87
  -9   8  10   82.63    5.28
  -9   8  10   82.85    5.83
  -9   8  10  111.84   11.09
  -9   8  10  113.29   10.97
   9  -8 -10   99.46    5.94
   9  -8 -10  105.96    6.14
   9  -8 -10  117.35   10.39
   9  -8 -10  122.15   26.45
  -9   8  11   18.10    1.81
  -9   8  11   14.78    2.24
  -9   8  11   21.03    4.59
  -9   8  11   24.61    4.32
   9  -8 -11   21.54    2.15
   9  -8 -11   17.87    2.02
   9  -8 -11   23.64    3.91
   9  -8 -11   14.92   20.94
  -9   8  12   21.30    2.06
  -9   8  12   26.37    2.75
  -9   8  12   28.31    5.29
  -9   8  12   23.27    4.53
   9  -8 -12   24.92    2.37
   9  -8 -12   27.57    2.45
   9  -8 -12   25.24    4.34
  -9   8  13   35.12    2.82
  -9   8  13   37.57    3.53
  -9   8  13   41.14    6.53
  -9   8  13   40.63    5.79
   9  -8 -13   40.15    3.15
   9  -8 -13   41.79    3.20
   9  -8 -13   39.97    5.57
   9  -8 -13   29.28   20.15
  -9   8  14   40.67    3.14
  -9   8  14   45.93    7.14
  -9   8  14   47.36    6.30
   9  -8 -14   45.93    3.47
   9  -8 -14   49.59    6.18
   9  -8 -14   50.00   21.31
  -9   8  15   72.10    4.75
  -9   8  15   71.03    5.44
  -9   8  15   89.15    8.95
   9  -8 -15   75.75    5.06
   9  -8 -15   85.71    8.73
   9  -8 -15   84.05   23.53
  -9   8  16   48.39    3.47
  -9   8  16   39.70    3.93
  -9   8  16   44.09    6.17
   9  -8 -16   43.57    3.72
   9  -8 -16   50.10    6.25
   9  -8 -16   49.71   16.98
  -9   8  17   38.06    3.84
  -9   8  17   42.33    5.86
   9  -8 -17   39.11    3.41
   9  -8 -17   44.24    6.00
  -9   9   1  193.39   16.41
  -9   9   1  195.50   29.89
   9  -9  -1  188.62   16.87
   9  -9  -1  220.83   24.50
  -9   9   2   89.69    9.54
   9  -9  -3   45.61    6.68
   9  -9  -3   36.60   24.47
   9  -9  -4   93.90   10.07
   9  -9  -4   71.96   35.09
  -9   9   5   28.62    2.50
   9  -9  -5   33.45    2.19
   9  -9  -5   29.46    2.09
   9  -9  -5   46.68    5.71
   9  -9  -5   32.87   32.50
  -9   9   6    0.90    0.52
  -9   9   6    1.85    1.15
   9  -9  -6    1.62    0.75
   9  -9  -6    0.46    0.79
   9  -9  -6    0.20    1.67
   9  -9  -6   35.90   35.43
  -9   9   7   22.64    1.77
  -9   9   7   21.51    2.38
  -9   9   7   15.60    5.88
   9  -9  -7   18.52    1.85
   9  -9  -7   21.43    1.90
   9  -9  -7   22.53    4.18
  -9   9   8   13.14    1.40
  -9   9   8   12.39    1.99
  -9   9   8   14.68    3.68
  -9   9   8   15.54    4.90
   9  -9  -8   14.31    1.62
   9  -9  -8   13.61    1.66
   9  -9  -8   14.66    3.35
   9  -9  -8  -35.88   33.24
  -9   9   9   71.63    4.51
  -9   9   9   75.64    9.21
  -9   9   9   88.78   10.21
   9  -9  -9   83.85    5.01
   9  -9  -9   85.12    8.85
   9  -9  -9  109.91   33.46
  -9   9  10  169.16    9.95
  -9   9  10  177.49   15.98
  -9   9  10  172.79   15.96
   9  -9 -10  163.36    9.34
   9  -9 -10  187.94   15.42
   9  -9 -10  254.99   40.46
  -9   9  11  211.76   11.72
  -9   9  11  209.98   12.40
  -9   9  11  226.01   19.73
  -9   9  11  235.94   19.71
   9  -9 -11  258.62   13.36
   9  -9 -11  242.82   12.68
   9  -9 -11  261.04   19.64
  -9   9  12  110.00    6.52
  -9   9  12  101.74    7.01
  -9   9  12  115.09   11.65
   9  -9 -12  114.82    6.92
   9  -9 -12  124.78    7.07
   9  -9 -12  134.25   11.60
  -9   9  13   98.52    6.16
  -9   9  13   93.49    6.75
  -9   9  13  123.02   12.25
  -9   9  13  131.96   11.78
   9  -9 -13  114.47    6.85
   9  -9 -13  117.37    6.80
   9  -9 -13  123.39   11.18
   9  -9 -13  191.11   33.56
  -9   9  14   44.29    3.28
  -9   9  14   58.55    7.57
   9  -9 -14   40.01    3.37
   9  -9 -14   49.44    3.57
   9  -9 -14   53.88   23.40
  -9   9  15   70.56    4.77
  -9   9  15   77.75    5.83
  -9   9  15   76.54    8.76
   9  -9 -15   79.67    5.30
   9  -9 -15   97.96    9.07
   9  -9 -15   72.08   25.18
  -9   9  16  177.92    9.94
  -9   9  16  190.58   16.07
  -9   9  17   59.97    5.08
  -9   9  17   68.90    8.06
   9  -9 -17   69.17    4.96
   9  -9 -17   81.67    8.32
  -9  10   1   11.79    3.04
  -9  10   1    7.51   19.41
   9 -10  -1   14.12    4.30
   9 -10  -1   10.62   12.79
  -9  10   2    1.10    1.29
  -9  10   2    8.02   16.72
   9 -10  -2    1.80    2.90
   9 -10  -2  -17.40   14.80
  -9  10   3   53.90    7.06
  -9  10   3   40.67   14.21
   9 -10  -3   64.01    7.86
   9 -10  -3   93.52   25.89
  -9  10   4   30.68    5.08
  -9  10   4   32.48   12.17
   9 -10  -4   31.96    5.61
   9 -10  -4   51.11   28.03
  -9  10   5   39.28    5.87
  -9  10   5   17.92   10.43
   9 -10  -5   43.55    6.26
   9 -10  -5   67.95   37.52
  -9  10   6  168.88    8.93
  -9  10   6  179.39    9.89
  -9  10   6  174.33   15.56
  -9  10   6  193.74   19.50
   9 -10  -6  183.14    9.52
   9 -10  -6  158.47    8.78
   9 -10  -6  197.40   16.12
   9 -10  -6  213.27   49.21
  -9  10   7  222.10   11.48
  -9  10   7  202.69   11.64
  -9  10   7  209.17   18.41
  -9  10   7  237.93   21.56
   9 -10  -7  216.77   11.59
   9 -10  -7  223.63   11.70
   9 -10  -7  251.37   19.28
   9 -10  -7  293.25   57.34
  -9  10   8   94.42    5.48
  -9  10   8   90.05    6.11
  -9  10   8   93.27   10.33
  -9  10   8  106.49   12.44
   9 -10  -8   94.14    5.74
   9 -10  -8   98.20    5.71
   9 -10  -8  110.76   10.47
   9 -10  -8  146.59   43.68
  -9  10   9   44.01    2.99
  -9  10   9   39.21    3.63
  -9  10   9   48.26    6.71
  -9  10   9   48.54    8.01
   9 -10  -9   43.99    3.30
   9 -10  -9   44.67    3.19
  -9  10  10   57.05    3.82
  -9  10  10   59.78    4.74
   9 -10 -10   64.46    4.37
   9 -10 -10   62.01    4.06
   9 -10 -10   65.82    7.50
   9 -10 -10  109.15   36.70
  -9  10  11  122.17    7.20
  -9  10  11  120.76    7.96
  -9  10  11  123.16   13.08
   9 -10 -11  133.41    7.82
   9 -10 -11  143.77    7.93
   9 -10 -11  163.09   13.14
  -9  10  12   29.51    2.53
  -9  10  12   19.92    3.03
  -9  10  12   44.46    6.29
  -9  10  12   36.63    5.97
   9 -10 -12   31.98    2.77
   9 -10 -12   42.08    5.25
   9 -10 -12   65.81   31.35
  -9  10  13   16.10    1.80
  -9  10  13   12.36    2.42
  -9  10  13   20.78    4.66
  -9  10  13   21.34    4.19
   9 -10 -13   14.35    2.10
   9 -10 -13   14.82    1.98
   9 -10 -13   24.63    3.77
   9 -10 -13   40.48   25.47
  -9  10  14   -0.21    0.72
  -9  10  14   -1.23    1.42
  -9  10  14    3.03    1.76
   9 -10 -14    0.17    1.26
   9 -10 -14    0.25    1.14
   9 -10 -14    0.62    1.21
   9 -10 -14  -13.42   18.98
  -9  10  15   16.79    1.97
  -9  10  15   20.01    2.77
  -9  10  15   23.09    4.13
   9 -10 -15   17.16    2.24
   9 -10 -15   21.31    3.88
   9 -10 -15   29.08   20.68
  -9  10  16    8.33    1.37
  -9  10  16   11.66    2.99
   9 -10 -16   11.12    2.90
   9 -10 -16   -1.54   10.05
  -9  10  17   11.79    2.36
  -9  10  17   15.02    3.44
   9 -10 -17   12.05    2.20
   9 -10 -17   20.79    3.76
   9 -11  -1  120.51   20.11
  -9  11   2   56.39    6.93
  -9  11   2   72.79   25.17
   9 -11  -2   50.49    7.79
   9 -11  -2   41.69   17.46
  -9  11   3   97.82   10.48
  -9  11   3  109.92   22.54
   9 -11  -3  122.28   11.90
   9 -11  -3   99.65   29.39
  -9  11   4  168.12   15.30
  -9  11   4  183.12   23.95
   9 -11  -4  196.55   16.67
   9 -11  -4  132.97   38.31
  -9  11   5   62.33    7.93
  -9  11   5   70.96   15.18
   9 -11  -5   75.23    8.67
   9 -11  -5  104.85   42.93
  -9  11   6   16.10    3.78
  -9  11   6   19.73    9.65
   9 -11  -6   14.58    4.03
   9 -11  -6   69.20   43.73
  -9  11   7   28.85    2.08
  -9  11   7   24.80    2.95
  -9  11   7   33.43    5.22
  -9  11   7   29.92    8.88
   9 -11  -7   27.24    2.24
   9 -11  -7   26.76    2.20
   9 -11  -7    4.05   39.31
  -9  11   8   21.91    2.97
  -9  11   8   31.44    5.37
   9 -11  -8   28.34    2.47
   9 -11  -8   34.84    5.27
   9 -11  -8   97.46   47.30
  -9  11   9    2.02    0.80
  -9  11   9    2.00    1.72
  -9  11   9    1.36    2.21
  -9  11   9    1.39    4.39
   9 -11  -9    1.57    1.04
   9 -11  -9    2.88    1.18
   9 -11  -9   -0.85    1.75
   9 -11  -9  -16.83   39.11
  -9  11  10   11.46    1.44
  -9  11  10   16.55    2.57
  -9  11  10   12.83    4.97
   9 -11 -10   12.75    1.81
   9 -11 -10   16.37    1.93
   9 -11 -10   16.25    3.47
  -9  11  11    8.44    1.36
  -9  11  11   14.43    2.45
  -9  11  11   11.00    3.73
  -9  11  11    8.88    4.40
   9 -11 -11   13.08    1.92
   9 -11 -11   13.40    1.89
   9 -11 -11   15.90    3.22
   9 -11 -11   23.57   36.30
  -9  11  12   60.58    4.22
  -9  11  12   74.82    9.12
  -9  11  12   86.57    9.82
   9 -11 -12   72.04    4.67
   9 -11 -12   78.66    8.29
   9 -11 -12  106.63   39.58
  -9  11  13   92.34    5.97
  -9  11  13  101.75    7.28
  -9  11  13  107.82   11.80
  -9  11  13  124.15   12.06
   9 -11 -13  114.59    7.02
   9 -11 -13  123.30   11.04
   9 -11 -13  115.93   32.20
  -9  11  14   83.51    5.49
  -9  11  14   77.64    6.31
  -9  11  14  122.57   11.18
   9 -11 -14  100.85    6.42
   9 -11 -14   95.85    5.89
   9 -11 -14  112.12   10.21
   9 -11 -14  115.98   33.15
  -9  11  15   87.30    5.60
  -9  11  15   82.15    6.34
  -9  11  15   99.33   10.18
   9 -11 -15  113.25    6.85
  -9  11  16   85.63    5.64
  -9  11  16   95.28   10.16
   9 -11 -16  119.57   10.51
  -9  12   1   16.87   29.73
   9 -12  -1   60.76    8.67
  -9  12   2   26.76    4.71
  -9  12   2   22.83   23.89
   9 -12  -2   32.04    6.28
   9 -12  -2   18.88   18.32
  -9  12   3    9.05    2.74
  -9  12   3    0.74   17.42
   9 -12  -3    7.54    4.02
   9 -12  -3    7.64   20.79
  -9  12   4    0.33    1.40
  -9  12   4    7.63   14.71
   9 -12  -4    4.81    3.01
   9 -12  -4   -5.80   25.95
  -9  12   5   25.68    4.79
  -9  12   5   34.88   14.11
   9 -12  -5   27.28    5.54
   9 -12  -5   26.33   32.02
  -9  12   6   87.07    9.47
  -9  12   6   92.81   16.55
   9 -12  -6   77.16    9.47
   9 -12  -6  129.85   50.02
  -9  12   7   59.63    3.49
  -9  12   7   57.44    3.45
  -9  12   7   63.04    7.81
  -9  12   7   56.50   12.36
   9 -12  -7   68.05    7.98
   9 -12  -7   33.18   43.36
  -9  12   8   51.19    3.28
  -9  12   8   42.02    4.28
  -9  12   8   55.49   10.39
   9 -12  -8   49.19    3.52
   9 -12  -8   50.25    3.43
   9 -12  -8   50.27    6.91
  -9  12   9   65.41    4.09
  -9  12   9   63.57    5.30
  -9  12   9   73.70    8.63
  -9  12   9   57.65   10.56
   9 -12  -9   68.00    4.61
   9 -12  -9   63.22    4.23
   9 -12  -9   68.29    8.06
   9 -12  -9  100.74   46.95
  -9  12  10  108.91    6.44
  -9  12  10  112.64    7.89
  -9  12  10  115.48   12.00
  -9  12  10  127.70   14.51
   9 -12 -10  114.74    7.08
   9 -12 -10  115.59    6.75
   9 -12 -10  127.52   11.75
   9 -12 -10  198.66   50.07
  -9  12  11  120.55    7.21
  -9  12  11  118.82    8.28
  -9  12  11  141.90   13.59
  -9  12  11  162.86   15.46
   9 -12 -11  141.35    8.27
   9 -12 -11  131.80    7.64
   9 -12 -11  151.65   13.07
   9 -12 -11  223.31   49.04
  -9  12  12  145.40    8.51
   9 -12 -12  152.78    9.11
   9 -12 -12  165.21    9.16
   9 -12 -12  193.97   15.17
   9 -12 -12  174.69   43.68
  -9  12  13   56.68    5.36
  -9  12  13   81.30    9.71
   9 -12 -13   76.91    5.31
   9 -12 -13   84.30    8.59
   9 -12 -13   46.50   33.88
  -9  12  14   33.34    2.77
  -9  12  14   25.51    3.48
  -9  12  14   39.20    6.14
   9 -12 -14   34.69    3.41
   9 -12 -14   34.72    2.92
   9 -12 -14   46.97    5.60
   9 -12 -14   21.99   20.66
  -9  12  15    3.38    1.16
  -9  12  15    1.60    1.75
  -9  12  15    3.94    2.32
   9 -12 -15    5.83    1.67
   9 -12 -15    5.69    2.10
   9 -12 -15   -3.52    6.36
  -9  12  16    0.25    0.92
  -9  12  16    0.75    1.35
   9 -12 -16   -1.24    1.58
  -9  13   1   44.19    5.96
  -9  13   1   47.14   28.16
   9 -13  -1   35.06    7.30
   9 -13  -1   48.44   16.37
  -9  13   2   26.48    4.42
  -9  13   2   26.34   28.10
   9 -13  -2   16.43    5.88
   9 -13  -2   21.56   16.88
  -9  13   3   36.53    5.55
  -9  13   3   20.04   23.39
   9 -13  -3   39.18    6.98
   9 -13  -3   64.09   23.93
  -9  13   4   92.05    9.78
  -9  13   4   75.21   23.20
   9 -13  -4   92.14   10.74
   9 -13  -4  111.75   34.82
  -9  13   5   79.09    8.99
  -9  13   5   82.04   19.32
   9 -13  -5   80.67    9.71
   9 -13  -5  109.36   41.04
  -9  13   6   59.21    7.44
  -9  13   6   51.89   15.73
   9 -13  -6   55.26    7.76
   9 -13  -6   49.08   40.70
  -9  13   7   58.34    7.29
  -9  13   7   55.89   14.28
   9 -13  -7   48.39    7.28
   9 -13  -7   37.45   44.46
  -9  13   8   37.07    2.51
  -9  13   8   35.12    2.50
  -9  13   8   41.09    6.07
  -9  13   8   38.80   11.18
   9 -13  -8   45.33    6.26
   9 -13  -8   40.59   45.70
  -9  13   9   94.06    5.53
  -9  13   9   78.27    6.72
  -9  13   9  104.99   10.79
  -9  13   9  100.57   14.60
   9 -13  -9  113.61   10.80
   9 -13  -9  134.08   58.39
  -9  13  10   34.87    2.74
  -9  13  10   37.14    6.16
   9 -13 -10   36.70    5.74
   9 -13 -10   67.08   41.89
  -9  13  11    7.21    1.38
  -9  13  11    2.07    2.37
  -9  13  11   14.82    5.48
   9 -13 -11   11.53    2.87
   9 -13 -11  -23.00   33.78
  -9  13  12   23.14    2.30
  -9  13  12   22.47    3.61
  -9  13  12   31.45    6.63
   9 -13 -12   33.50    4.83
   9 -13 -12  -23.11   30.05
  -9  13  13   69.67    6.04
  -9  13  13   89.30   10.14
  -9  13  14   12.64    1.78
  -9  13  14   11.77    2.85
  -9  13  14   18.32    4.47
  -9  13  15   32.23    6.20
   9 -13 -15   59.65    6.63
  -9  14   1    0.07   23.42
   9 -14  -1   50.27    8.11
   9 -14  -1   40.11   11.09
  -9  14   2   21.20   23.32
   9 -14  -2   33.06    6.57
   9 -14  -2   13.12   11.24
  -9  14   3   10.16   16.80
   9 -14  -3    7.66    4.29
   9 -14  -3   11.18   10.24
  -9  14   4    9.19    2.76
  -9  14   4    2.85   14.80
   9 -14  -4    9.44    4.25
   9 -14  -4   -2.07   15.41
  -9  14   5   22.48    4.33
  -9  14   5   15.18   14.97
   9 -14  -5   22.94    5.45
   9 -14  -5   13.44   26.88
  -9  14   6    3.23    2.19
  -9  14   6    0.09   12.00
   9 -14  -6    7.46    3.37
   9 -14  -6   66.64   34.42
  -9  14   7    4.28    2.21
  -9  14   7   -6.52    9.47
   9 -14  -7    2.02    2.93
   9 -14  -7   15.01   35.60
  -9  14   8   22.03    9.79
   9 -14  -8   28.86    5.40
   9 -14  -8   29.52   41.12
  -9  14   9   32.76    9.90
   9 -14  -9   74.53    8.24
  -9  14  10   55.43   10.27
   9 -14 -10   69.54    8.18
   9 -14 -10   18.64   35.92
  -9  14  11   39.34    7.99
   9 -14 -11   42.11    6.17
   9 -14 -11   17.66   25.11
  -9  14  12   67.25    9.49
  -9  14  13  116.24   12.85
  -9  14  14   58.08    8.99
   9 -14 -14  100.93    9.42
  -9  15   1    8.45    7.75
   9 -15  -1    3.80    4.09
   9 -15  -1   -2.99    4.23
  -9  15   2   10.71   14.93
   9 -15  -2    1.60    4.08
  -9  15   3   -4.90   13.47
   9 -15  -3    2.19    3.68
   9 -15  -3    2.19    5.00
  -9  15   4    5.34   10.33
  -9  15   5   17.90    9.81
  -9  15   6   19.30    9.80
  -9  15   7   34.21   10.12
   9 -15  -7   45.71    6.94
   9 -15  -7   22.05   14.87
  -9  15   8   37.15    9.28
  -9  15   9   15.53    7.26
   9 -15  -9   41.97    6.02
   9 -15  -9   19.94   17.57
   9 -15 -10   12.09   11.77
  -9  15  11   28.02    7.26
  -9  15  12    2.33    3.17
   9 -15 -12    6.89    2.82
  -9  16   4   14.19    7.14
   9 -16  -4   59.07    8.35
  -9  16   5   16.06    6.93
   9 -16  -5   77.35    8.41
  -9  16   6   14.03    5.68
  -9  16   7    1.20    4.06
   9 -16  -7    3.49    3.32
  -9  16   8    4.31    3.90
   9 -16  -8    2.88    3.12
  -9  16   9   -0.84    3.76
   9 -16  -9   -1.35    2.37
   8  18  -1    1.53   26.25
  -8 -17   1  101.09    6.24
  -8 -17   1  113.05   12.01
   8  17  -1  114.24    6.47
   8  17  -1   77.04   35.73
  -8 -17   2   70.54    4.70
  -8 -17   2   68.93    9.24
   8  17  -2   45.09   33.92
   8  17  -2   64.09    7.92
  -8 -17   3   42.75    7.58
   8  17  -3   31.53   21.06
  -8 -16   1   35.30    6.24
   8  16  -1   30.57    2.56
   8  16  -1   30.64    3.18
   8  16  -1   35.92   42.31
  -8 -16   2    5.06    1.30
  -8 -16   2   10.55    3.78
   8  16  -2    6.29    1.16
   8  16  -2  -12.48   41.61
   8  16  -2    4.78    2.30
  -8 -16   3    2.52    1.08
   8  16  -3    3.14    0.98
   8  16  -3    2.53    1.77
   8  16  -4   19.34   27.66
  -8 -16   5    8.29    4.25
  -8 -15   1   35.13    2.89
  -8 -15   1   34.59    6.49
  -8 -15   1   35.80    7.10
   8  15  -1   38.60    2.83
   8  15  -1   44.14    3.64
   8  15  -1   45.99    5.68
   8  15  -1   24.16   39.92
  -8 -15   2   19.02    2.05
  -8 -15   2   14.23    4.92
  -8 -15   2   20.45    4.93
   8  15  -2   21.73    1.93
   8  15  -2   17.58    2.38
   8  15  -2    6.67   45.31
   8  15  -2   18.94    3.94
  -8 -15   3   94.07   11.10
   8  15  -3  103.25    6.02
   8  15  -3  108.49    7.05
   8  15  -3   89.62   48.13
   8  15  -3  105.51   10.63
  -8 -15   4  133.70    7.69
  -8 -15   4  142.64   13.85
   8  15  -4  147.78    8.03
   8  15  -4  116.05   45.78
   8  15  -4  127.25   12.48
  -8 -15   5   74.13    9.54
   8  15  -5   49.91   32.77
   8  15  -5   75.29    8.41
  -8 -15   6   46.67    7.28
   8  15  -6   11.99   15.25
  -8 -14   1   64.29    4.13
  -8 -14   1   64.46    8.06
   8  14  -1   58.69    3.77
   8  14  -1   46.84    3.98
   8  14  -1   91.32   39.04
  -8 -14   2   76.87    4.77
  -8 -14   2   66.19    8.86
  -8 -14   2   75.21    9.17
   8  14  -2   71.27    4.44
   8  14  -2   69.78    5.06
   8  14  -2   77.80   38.44
   8  14  -2   74.42    8.34
  -8 -14   3   40.98    3.09
  -8 -14   3   41.74    6.84
  -8 -14   3   53.05    6.80
   8  14  -3   39.23    2.92
   8  14  -3   38.19    3.52
   8  14  -3   14.01   37.81
   8  14  -3   41.11    5.80
  -8 -14   4   12.55    1.89
  -8 -14   4   17.11    4.54
   8  14  -4   14.39    1.70
   8  14  -4   12.04    2.11
   8  14  -4   57.64   45.86
   8  14  -4   14.67    3.30
  -8 -14   5    0.16    2.44
   8  14  -5   -0.80    0.78
   8  14  -5   -7.70   39.43
   8  14  -5    0.12    0.94
  -8 -14   6   23.94    2.51
  -8 -14   6   27.75    6.16
   8  14  -6   40.06    2.88
   8  14  -6   -6.67   34.75
   8  14  -6   31.24    4.93
  -8 -14   7   24.53    5.44
   8  14  -7  -14.62   14.52
  -8 -13   1    4.40    0.89
  -8 -13   1    5.62    1.13
  -8 -13   1    2.14    2.80
  -8 -13   1    4.65    3.40
   8  13  -1    5.08    0.96
   8  13  -1    4.61    1.29
   8  13  -1    5.26    1.90
   8  13  -1   -2.79   33.75
  -8 -13   2    5.63    0.99
  -8 -13   2    4.35    1.21
  -8 -13   2    3.87    2.95
  -8 -13   2    6.44    3.10
   8  13  -2    4.86    1.08
   8  13  -2    4.09    1.27
   8  13  -2   -0.52   28.93
   8  13  -2    4.73    2.05
  -8 -13   3   51.07    3.51
  -8 -13   3   44.35    7.09
  -8 -13   3   43.47    6.75
   8  13  -3   51.65    3.41
   8  13  -3   26.11   34.57
   8  13  -3   47.90    6.37
  -8 -13   4  133.14    7.39
  -8 -13   4  123.73   12.75
  -8 -13   4  129.52   12.19
   8  13  -4  122.22    6.97
   8  13  -4  122.00    7.68
   8  13  -4   72.12   42.29
   8  13  -4  120.31   11.73
  -8 -13   5   85.95   10.06
  -8 -13   5   90.50    9.48
   8  13  -5   81.22    5.80
   8  13  -5   10.73   47.97
   8  13  -5   82.04    8.98
  -8 -13   6  107.76    6.58
  -8 -13   6  136.30   12.88
   8  13  -6  125.87    7.06
   8  13  -6  135.59   53.33
   8  13  -6  120.46   11.55
   8  13  -7   88.80    5.40
   8  13  -7   88.17    9.34
  -8 -13   8    8.75    3.59
   8  13  -8    0.12   18.87
  -8 -12   1  219.69   12.00
  -8 -12   1  233.22   19.53
  -8 -12   1  233.67   19.90
   8  12  -1  257.35   12.96
   8  12  -1  255.94   39.23
  -8 -12   2  268.24   13.40
  -8 -12   2  243.88   19.90
  -8 -12   2  239.60   19.70
   8  12  -2  208.63   11.58
   8  12  -2  187.36   43.30
   8  12  -2  236.38   19.09
  -8 -12   3  207.52   10.77
  -8 -12   3  202.79   17.12
  -8 -12   3  194.02   16.46
   8  12  -3  158.61    9.82
   8  12  -3  164.37   44.12
   8  12  -3  184.53   15.86
  -8 -12   4  149.66    8.28
  -8 -12   4  159.04   14.42
   8  12  -4  143.82    7.96
   8  12  -4  139.46    8.57
   8  12  -4  149.04   48.40
  -8 -12   5   19.17    1.98
  -8 -12   5   17.68    4.42
  -8 -12   5   28.42    4.24
   8  12  -5   19.07    1.89
   8  12  -5   16.25    2.36
   8  12  -5   29.20   41.62
   8  12  -5   16.77    3.78
  -8 -12   6    0.89    1.10
  -8 -12   6    2.26    1.66
   8  12  -6    0.68    0.92
   8  12  -6    0.02    1.01
   8  12  -6  -14.45   49.47
   8  12  -6    1.73    1.31
  -8 -12   7    1.95    1.22
  -8 -12   7    3.62    2.53
   8  12  -7    1.70    0.95
   8  12  -7   65.35   42.13
   8  12  -7    2.64    1.52
  -8 -12   8    3.01    1.37
  -8 -12   8    3.82    2.93
   8  12  -8    3.09    1.05
   8  12  -8    3.18    1.75
  -8 -12   9   -0.52    2.33
   8  12  -9   -9.89   22.22
  -8 -11   1   24.62    2.12
  -8 -11   1   25.53    4.82
  -8 -11   1   22.13    4.83
   8  11  -1   23.86    2.00
   8  11  -1   24.04   21.98
  -8 -11   2    9.55    1.31
  -8 -11   2   10.13    3.43
  -8 -11   2   11.05    3.25
   8  11  -2    9.91    1.30
   8  11  -2   16.62   24.24
   8  11  -2    9.74    2.73
  -8 -11   3    0.22    0.74
  -8 -11   3   -1.38    2.15
  -8 -11   3    0.26    1.36
   8  11  -3   -0.45    0.65
   8  11  -3  -20.48   26.42
   8  11  -3    0.26    0.92
  -8 -11   4   48.47    3.32
  -8 -11   4   47.60    6.38
   8  11  -4   45.52    3.19
   8  11  -4   48.11    6.23
  -8 -11   5   59.22    3.98
  -8 -11   5   68.90    8.16
  -8 -11   5   64.49    7.48
   8  11  -5   66.15    4.11
   8  11  -5   94.49   40.80
   8  11  -5   55.83    7.23
  -8 -11   6   88.70    5.30
  -8 -11   6   86.92    9.70
  -8 -11   6   83.40    9.00
   8  11  -6   85.68    5.16
   8  11  -6   76.69    5.56
   8  11  -6   93.83   38.10
   8  11  -6   86.88    9.07
  -8 -11   7   67.27    4.59
  -8 -11   7   83.71    8.62
   8  11  -7   79.00    4.84
   8  11  -7   76.08    5.40
   8  11  -7   85.36    8.72
  -8 -11   8   31.58    2.75
  -8 -11   8   34.28    6.00
   8  11  -8   39.20    2.89
   8  11  -8   94.63   41.95
   8  11  -8   37.59    5.40
  -8 -11   9   87.31    5.52
  -8 -11   9   82.12   10.22
   8  11  -9  103.45    5.91
   8  11  -9   18.09   45.41
   8  11  -9   92.87    9.65
  -8 -11  10  170.80   14.98
   8  11 -10   72.43   22.91
  -8 -10   1  167.66    9.54
  -8 -10   1  199.71   16.70
  -8 -10   1  192.84   16.51
   8  10  -1  186.81   10.40
   8  10  -1  150.11   30.60
   8  10  -1  209.58   16.44
  -8 -10   2  125.53    7.35
  -8 -10   2  144.59    7.83
  -8 -10   2  135.04   12.99
  -8 -10   2  142.69   13.00
   8  10  -2  146.74    7.82
   8  10  -2  134.94    8.05
   8  10  -2  130.83   28.92
   8  10  -2  131.23   12.37
  -8 -10   3  105.41    6.17
  -8 -10   3  107.93   11.16
   8  10  -3  117.25    6.46
   8  10  -3  107.47   28.73
  -8 -10   4  184.72   10.15
  -8 -10   4  198.41   17.06
  -8 -10   4  203.88   16.78
   8  10  -4  197.70   10.49
   8  10  -4  258.66   40.27
   8  10  -4  199.90   16.57
  -8 -10   5  323.16   16.73
  -8 -10   5  330.05   25.53
  -8 -10   5  323.22   24.77
   8  10  -5  342.86   17.27
   8  10  -5  271.04   39.73
   8  10  -5  326.24   24.83
  -8 -10   6   77.21    4.68
  -8 -10   6   79.17    8.83
  -8 -10   6   69.59    8.02
   8  10  -6   71.91    4.50
   8  10  -6  113.02   32.95
   8  10  -6   67.17    8.00
  -8 -10   7   16.44    1.88
  -8 -10   7   16.54    4.15
  -8 -10   7   17.47    3.51
   8  10  -7   16.86    1.75
   8  10  -7   35.50   27.56
   8  10  -7   15.22    3.48
  -8 -10   8   58.23    3.96
  -8 -10   8   54.77    6.97
   8  10  -8   65.20    4.11
   8  10  -8   58.05    7.17
  -8 -10   9    1.29    1.17
  -8 -10   9    1.71    2.07
   8  10  -9    0.23    0.90
   8  10  -9   -7.12   27.05
   8  10  -9    0.12    1.24
  -8 -10  10    0.73    1.28
   8  10 -10   -0.13    0.95
   8  10 -10   -0.12    1.15
  -8 -10  11    1.34    2.03
   8  10 -11   -3.26    9.09
  -8  -9   1  291.98   15.55
  -8  -9   1  314.26   16.13
   8   9  -1  349.18   17.06
   8   9  -1  287.64   15.71
   8   9  -1  323.30   37.67
   8   9  -1  329.57   24.30
  -8  -9   2  157.74    8.66
  -8  -9   2  159.52    8.67
  -8  -9   2  173.22   14.81
  -8  -9   2  157.46   14.13
   8   9  -2  164.19    8.74
   8   9  -2  142.81    8.52
   8   9  -2  161.89   28.00
   8   9  -2  170.01   14.22
  -8  -9   3    1.86    0.63
  -8  -9   3    2.42    0.96
  -8  -9   3    2.81    1.99
  -8  -9   3    1.81    1.54
   8   9  -3    2.47    0.82
   8   9  -3    2.48    0.99
   8   9  -3    3.93   16.18
   8   9  -3    1.00    1.25
  -8  -9   4   39.71    2.92
  -8  -9   4   41.59    2.90
  -8  -9   4   48.85    6.21
   8   9  -4   42.22    2.90
   8   9  -4   30.25    2.97
   8   9  -4   71.01   21.03
  -8  -9   5   66.50    4.22
  -8  -9   5   75.07    8.36
  -8  -9   5   68.60    7.76
   8   9  -5   66.43    4.20
   8   9  -5   46.32   21.32
   8   9  -5   67.53    7.73
  -8  -9   6    7.90    1.42
  -8  -9   6    6.34    2.83
  -8  -9   6    7.28    2.37
   8   9  -6    8.53    1.33
   8   9  -6  -11.74   19.15
   8   9  -6    8.38    2.43
  -8  -9   7  114.62    6.48
  -8  -9   7  105.59   11.08
  -8  -9   7  100.10   10.38
   8   9  -7  113.34    6.41
   8   9  -7  106.53   28.77
   8   9  -7  111.03   10.74
  -8  -9   8  123.24    7.08
  -8  -9   8  127.40   12.40
  -8  -9   8  120.80   11.65
   8   9  -8  141.23    7.61
   8   9  -8  129.43   31.46
   8   9  -8  122.37   11.88
  -8  -9   9   29.33    2.84
  -8  -9   9   36.07    5.11
   8   9  -9   35.80    2.94
   8   9  -9   34.37    5.27
  -8  -9  10   41.81    3.26
  -8  -9  10   48.20    6.68
   8   9 -10   49.62    3.40
   8   9 -10   32.64   26.88
   8   9 -10   43.22    6.23
   8   9 -11   71.50   27.40
   8   9 -11   88.55    9.64
  -8  -9  12   32.29    5.43
   8   9 -12    7.61    9.64
  -8  -8   1    8.70    1.09
  -8  -8   1    8.28    1.18
   8   8  -1    9.77    1.15
   8   8  -1    8.01    1.33
  -8  -8   2    2.21    0.63
  -8  -8   2    1.79    0.79
  -8  -8   2    1.34    1.87
  -8  -8   2    3.60    1.63
   8   8  -2    3.52    0.79
   8   8  -2    2.05    0.94
   8   8  -2  -31.01   13.98
   8   8  -2    1.92    1.33
  -8  -8   3  156.30    8.03
  -8  -8   3  130.67    7.20
  -8  -8   3  120.71   12.16
  -8  -8   3  122.19   11.79
   8   8  -3  132.03    7.21
   8   8  -3  118.43    7.17
  -8  -8   4  284.14   22.40
  -8  -8   4  268.49   21.49
   8   8  -4  310.59   15.43
   8   8  -4  286.20   15.07
   8   8  -4  228.13   31.93
   8   8  -4  271.32   21.54
  -8  -8   5  324.41   17.21
  -8  -8   5  351.13   17.85
  -8  -8   5  368.19   27.08
  -8  -8   5  340.61   25.96
   8   8  -5  397.69   39.33
  -8  -8   6  239.69   12.36
  -8  -8   6  234.53   12.10
  -8  -8   6  228.20   18.73
  -8  -8   6  204.68   17.65
   8   8  -6  223.99   11.81
   8   8  -6  207.62   11.87
   8   8  -6  229.52   30.25
   8   8  -6  228.30   18.30
  -8  -8   7  274.30   14.45
  -8  -8   7  272.40   14.31
  -8  -8   7  292.61   22.61
  -8  -8   7  276.52   21.59
   8   8  -7  319.31   38.05
   8   8  -7  272.03   21.63
  -8  -8   8  138.68    7.78
  -8  -8   8  151.63   13.52
  -8  -8   8  143.43   12.72
   8   8  -8  152.71    8.18
   8   8  -8  195.36   31.30
   8   8  -8  117.72   12.35
  -8  -8   9   49.58    3.64
  -8  -8   9   63.40    7.56
  -8  -8   9   55.48    6.86
   8   8  -9   66.10    4.09
   8   8  -9   70.26   23.34
   8   8  -9   56.39    7.16
  -8  -8  10   25.69    5.13
  -8  -8  10   30.53    4.72
   8   8 -10   51.38   23.57
   8   8 -10   30.62    5.01
  -8  -8  11   54.23    3.84
  -8  -8  11   51.32    7.08
   8   8 -11   57.21    3.76
   8   8 -11   53.14   25.79
   8   8 -11   45.48    6.82
  -8  -8  12   11.39    3.44
   8   8 -12    7.36   15.14
   8   8 -12   10.90    3.33
  -8  -8  13    0.31    1.60
   8   8 -13   -2.41    4.73
  -8  -7   1  376.88   19.23
  -8  -7   1  369.77   18.97
   8   7  -1  420.25   20.36
   8   7  -1  357.62   18.90
  -8  -7   2  287.66   14.84
  -8  -7   2  271.50   14.28
   8   7  -2  288.35   14.72
   8   7  -2  296.49   15.32
  -8  -7   3  511.41   26.43
  -8  -7   3  539.25   27.08
   8   7  -3  581.24   28.26
   8   7  -3  557.63   27.95
  -8  -7   4  309.99   16.12
  -8  -7   4  310.85   16.03
  -8  -7   4  346.91   25.17
  -8  -7   4  300.96   23.56
   8   7  -4  337.48   16.79
   8   7  -4  287.41   15.75
   8   7  -4  290.71   31.21
   8   7  -4  338.43   24.55
  -8  -7   5   69.80    4.50
  -8  -7   5   91.17    9.13
  -8  -7   5   81.19    8.45
   8   7  -5   70.19    4.81
   8   7  -5   69.56   16.37
   8   7  -5   88.28    8.66
  -8  -7   6    3.10    0.75
  -8  -7   6    1.87    1.08
  -8  -7   6    1.73    1.86
   8   7  -6    3.09    0.96
   8   7  -6    2.42    1.14
   8   7  -6    8.97   10.51
  -8  -7   7   48.05    3.25
  -8  -7   7   49.08    3.30
  -8  -7   7   41.99    6.27
  -8  -7   7   45.27    5.99
   8   7  -7   52.63    3.40
   8   7  -7   42.01    3.42
   8   7  -7   52.07   15.06
   8   7  -7   42.67    6.06
  -8  -7   8    0.27    0.50
  -8  -7   8    1.11    0.96
  -8  -7   8    0.47    0.79
   8   7  -8   -0.78    0.79
   8   7  -8   -0.40    1.01
   8   7  -8    0.46    1.07
  -8  -7   9    0.87    1.04
  -8  -7   9    1.36    1.77
   8   7  -9    0.93    0.84
   8   7  -9  -14.79   13.27
  -8  -7  10   31.31    2.64
  -8  -7  10   35.66    5.46
  -8  -7  10   30.15    4.83
   8   7 -10   32.31    2.57
   8   7 -10   64.82   19.76
   8   7 -10   29.71    5.14
  -8  -7  11   30.60    2.75
  -8  -7  11   29.32    5.31
   8   7 -11   34.75    2.70
   8   7 -11   40.29   19.17
   8   7 -11   34.72    5.47
  -8  -7  12   51.89    3.84
  -8  -7  12   53.73    7.16
   8   7 -12   57.88    3.85
   8   7 -12   50.85   22.97
   8   7 -12   52.81    7.30
  -8  -7  13  117.14   11.33
   8   7 -13   60.89   17.31
  -8  -6   1    4.26    0.75
  -8  -6   1    3.89    0.84
   8   6  -1    5.79    0.91
   8   6  -1    3.53    0.94
  -8  -6   2    0.85    0.48
  -8  -6   2    1.68    0.71
   8   6  -2    2.13    0.69
   8   6  -2    1.87    0.85
  -8  -6   3    7.11    1.06
   8   6  -3    6.54    1.01
  -8  -6   4   71.31    8.56
   8   6  -4   80.86    4.74
   8   6  -4   88.73    5.32
  -8  -6   5  103.62    6.03
  -8  -6   5  110.23    6.18
  -8  -6   5  105.01   10.62
  -8  -6   5  105.20   10.31
   8   6  -5  110.57    6.18
   8   6  -5  103.86    6.31
   8   6  -5  108.68   15.67
   8   6  -5  113.35   10.59
  -8  -6   6  149.54    8.17
  -8  -6   6  161.13    8.45
  -8  -6   6  149.72   13.43
  -8  -6   6  139.58   12.84
   8   6  -6  145.50    8.01
   8   6  -6  130.18    7.90
   8   6  -6  164.33   19.25
   8   6  -6  147.70   13.18
  -8  -6   7  169.68    9.42
  -8  -6   7  182.24   15.70
   8   6  -7  189.22    9.99
   8   6  -7  194.97   21.63
  -8  -6   8  244.46   12.51
  -8  -6   8  224.85   11.88
  -8  -6   8  250.66   19.27
  -8  -6   8  210.59   17.85
   8   6  -8  224.10   11.86
   8   6  -8  203.67   11.68
   8   6  -8  244.97   25.58
   8   6  -8  221.07   18.39
  -8  -6   9   91.92    5.34
  -8  -6   9   86.58    9.40
  -8  -6   9   84.57    8.92
   8   6  -9   78.91    5.36
   8   6  -9   92.72   17.11
   8   6  -9   83.59    9.24
  -8  -6  10   70.23    4.65
  -8  -6  10   73.38    8.59
  -8  -6  10   76.43    8.35
   8   6 -10   84.90    4.99
   8   6 -10   78.56   17.83
   8   6 -10   81.53    8.95
  -8  -6  11  162.22    8.87
  -8  -6  11  157.76   14.22
  -8  -6  11  152.88   13.66
   8   6 -11  173.82    9.14
   8   6 -11  157.71   23.92
   8   6 -11  131.51   13.80
  -8  -6  12   84.69    5.48
  -8  -6  12  100.35   10.11
   8   6 -12   94.13    5.62
   8   6 -12  108.68   21.32
  -8  -6  13   21.34    2.55
   8   6 -13   28.86    2.48
   8   6 -13   13.80   13.71
   8   6 -13   26.82    5.44
  -8  -6  14    6.31    2.54
   8   6 -14   -3.47    5.51
  -8  -5   1  672.24   32.99
  -8  -5   1  619.90   31.47
   8   5  -1  669.53   32.83
   8   5  -1  653.26   32.62
  -8  -5   2  695.71   34.56
  -8  -5   3  171.43    9.21
  -8  -5   3  175.87    9.23
   8   5  -3  184.15    9.47
   8   5  -3  158.71    9.05
  -8  -5   4  225.72   11.69
   8   5  -4  220.13   11.57
  -8  -5   5  425.34   21.53
  -8  -5   5  450.73   22.12
  -8  -5   5  448.49   31.68
  -8  -5   5  379.43   29.64
   8   5  -5  479.70   23.01
   8   5  -5  390.45   20.78
   8   5  -5  422.29   34.25
   8   5  -5  420.80   30.85
  -8  -5   6  199.04   10.81
  -8  -5   6  202.01   10.83
  -8  -5   6  229.61   17.90
  -8  -5   6  202.36   16.95
   8   5  -6  212.92   11.13
   8   5  -6  227.66   11.90
   8   5  -6  187.47   19.80
   8   5  -6  215.44   17.48
  -8  -5   7   54.35    3.63
  -8  -5   7   57.93    3.76
  -8  -5   7   66.46    7.32
  -8  -5   7   60.42    6.95
   8   5  -7   56.33    3.71
   8   5  -7   59.88    4.09
   8   5  -7   54.63   10.23
   8   5  -7   55.45    7.07
  -8  -5   8   74.40    4.58
  -8  -5   8   71.16    4.48
  -8  -5   8   77.15    8.40
  -8  -5   8   69.38    7.99
   8   5  -8   80.35    4.74
   8   5  -8   76.70    5.08
   8   5  -8   65.35   11.73
   8   5  -8   71.21    8.34
  -8  -5   9   23.60    1.96
  -8  -5   9   20.01    2.01
  -8  -5   9   25.60    4.21
  -8  -5   9   18.66    3.85
   8   5  -9   21.67    1.98
   8   5  -9   21.45    2.21
   8   5  -9   24.91    8.74
   8   5  -9   19.82    4.16
  -8  -5  10   15.33    1.53
  -8  -5  10   14.90    1.84
  -8  -5  10   16.96    3.47
  -8  -5  10   12.25    3.14
   8   5 -10   14.51    1.66
   8   5 -10    9.42    1.76
   8   5 -10    1.85   10.84
   8   5 -10   10.99    3.64
  -8  -5  11    4.04    0.86
  -8  -5  11    2.68    1.13
  -8  -5  11    5.91    2.29
  -8  -5  11    4.01    1.81
   8   5 -11    3.94    0.94
   8   5 -11   20.22   11.68
   8   5 -11    1.71    2.65
  -8  -5  12   11.89    1.45
  -8  -5  12   16.35    3.26
   8   5 -12   16.20    4.24
  -8  -5  13   71.00    4.62
  -8  -5  13   61.97    7.87
   8   5 -13   65.31    4.26
   8   5 -13   97.00   18.70
   8   5 -13   70.99    8.99
  -8  -5  14  102.39   10.55
  -8  -5  15   26.20    4.24
   8   5 -15    3.89    4.88
  -8  -4   1  271.56   13.36
  -8  -4   1  222.33   11.87
   8   4  -1  243.18   12.41
   8   4  -1  229.58   12.27
  -8  -4   2  243.42   12.62
  -8  -4   2  239.31   12.43
   8   4  -2  264.40   13.13
   8   4  -2  229.10   12.37
  -8  -4   3   94.65    5.40
   8   4  -3   96.03    5.66
  -8  -4   4    1.26    0.50
  -8  -4   4    0.56    0.66
   8   4  -4    0.79    0.64
   8   4  -4    1.10    0.75
  -8  -4   5   11.13    1.27
  -8  -4   5   14.89    1.53
  -8  -4   6    1.51    0.58
  -8  -4   6    2.21    0.88
  -8  -4   6    0.32    1.23
  -8  -4   6    1.51    1.13
   8   4  -6    1.64    0.81
   8   4  -6    1.50    0.85
   8   4  -6    0.27    3.35
   8   4  -6    3.28    1.52
  -8  -4   7   61.39    3.82
  -8  -4   7   65.86    3.98
  -8  -4   7   53.04    6.85
   8   4  -7   61.11    3.82
   8   4  -7   49.75    3.74
   8   4  -7   68.81    7.59
  -8  -4   8  104.00    6.01
  -8  -4   8  103.69    6.02
  -8  -4   8  102.02   10.35
  -8  -4   8   92.62    9.98
   8   4  -8  117.60    6.41
   8   4  -8  107.37    6.41
   8   4  -8  105.82   13.07
   8   4  -8  109.60   10.80
  -8  -4   9   99.78    5.91
  -8  -4   9  101.08    5.98
  -8  -4   9   98.51   10.32
  -8  -4   9  103.69   10.29
   8   4  -9  111.32    6.24
   8   4  -9  118.62    6.77
   8   4  -9  112.99   13.86
   8   4  -9  101.42   10.79
  -8  -4  10  134.30    7.38
  -8  -4  10  130.81    7.37
  -8  -4  10  126.82   12.07
  -8  -4  10  121.69   11.79
   8   4 -10  128.60    7.24
   8   4 -10  119.29    7.27
   8   4 -10  149.97   16.77
   8   4 -10  134.35   12.77
  -8  -4  11  152.41    8.59
  -8  -4  11  165.50    9.05
  -8  -4  11  152.60   14.13
  -8  -4  11  155.83   14.19
   8   4 -11  171.88    9.16
   8   4 -11  209.21   21.05
  -8  -4  12   76.98    4.95
  -8  -4  12   94.94    5.62
  -8  -4  12   89.32    9.38
  -8  -4  12   85.26    9.12
   8   4 -12   89.64    5.36
   8   4 -12   96.10   15.50
   8   4 -12   90.51   10.41
  -8  -4  13   88.68    5.70
  -8  -4  13  111.04    6.50
  -8  -4  13  113.48   10.90
   8   4 -13  117.43    6.59
   8   4 -13  141.46   18.62
   8   4 -13  108.15   12.06
  -8  -4  14   95.14    6.04
   8   4 -14  109.25    6.30
   8   4 -14  122.12   18.67
   8   4 -14  104.12   12.17
  -8  -4  15   29.50    4.82
   8   4 -15   13.86    7.32
  -8  -3   1  215.86   11.37
  -8  -3   1  226.16   11.57
   8   3  -1  217.95   11.31
   8   3  -1  228.73   11.86
  -8  -3   2   19.37    1.62
  -8  -3   2   18.00    1.56
   8   3  -2   20.22    1.62
   8   3  -2   20.72    1.82
   8   3  -3    5.13    0.85
   8   3  -3    4.49    0.92
  -8  -3   4  273.18   14.24
   8   3  -4  290.85   14.91
  -8  -3   5  895.33   45.15
  -8  -3   5 1003.28   48.09
   8   3  -5  998.25   48.02
   8   3  -5  885.24   45.05
  -8  -3   6  576.01   29.09
  -8  -3   6  587.01   29.31
  -8  -3   6  553.39   40.44
   8   3  -6  662.02   31.53
   8   3  -6  586.61   29.56
  -8  -3   7  365.93   18.61
  -8  -3   7  371.98   18.73
  -8  -3   7  375.59   27.42
  -8  -3   7  326.45   26.11
   8   3  -7  379.84   18.99
   8   3  -7  375.63   19.13
   8   3  -7  342.63   28.05
   8   3  -7  378.02   28.00
  -8  -3   8  254.87   13.18
  -8  -3   8  271.28   20.39
  -8  -3   8  233.67   19.39
   8   3  -8  236.63   21.18
   8   3  -8  246.96   20.37
  -8  -3   9   36.21    2.70
  -8  -3   9   35.64    2.75
  -8  -3   9   42.69    5.51
   8   3  -9   42.39    2.92
   8   3  -9   30.24    2.84
   8   3  -9   40.97    7.12
  -8  -3  10   67.39    4.12
  -8  -3  10   61.88    4.07
  -8  -3  10   71.33    7.57
  -8  -3  10   63.33    7.36
   8   3 -10   61.89    3.98
   8   3 -10   49.57    3.88
   8   3 -10   65.23    9.52
   8   3 -10   59.53    8.14
  -8  -3  11   36.74    2.73
  -8  -3  11   41.22    5.50
  -8  -3  11   36.09    5.37
   8   3 -11   32.62    3.00
   8   3 -11   44.03    8.39
   8   3 -11   34.91    6.48
  -8  -3  12    9.17    1.29
  -8  -3  12   10.04    1.67
  -8  -3  12   10.55    2.76
  -8  -3  12    9.73    2.75
   8   3 -12    9.40    1.32
   8   3 -12    8.56    5.92
   8   3 -12    4.42    4.04
  -8  -3  13    0.67    0.66
  -8  -3  13   -0.51    0.97
  -8  -3  13    0.06    1.30
   8   3 -13    0.93    0.79
   8   3 -13   -4.62    3.24
  -8  -3  14    0.63    1.23
  -8  -3  14    0.77    1.17
   8   3 -14    0.08    0.85
   8   3 -14    6.84    7.31
   8   3 -14    2.26    4.34
  -8  -3  15   29.48    4.91
   8   3 -15   15.41    7.92
   8   3 -15   37.30    7.44
  -8  -3  16   54.66    6.55
   8   3 -16   30.33    7.06
  -8  -2   1  241.32   12.46
   8   2  -1  253.60   12.82
  -8  -2   2  421.64   21.11
  -8  -2   2  413.52   20.76
   8   2  -2  426.95   21.16
   8   2  -2  406.36   20.80
  -8  -2   3  186.53    9.86
  -8  -2   3  191.74    9.93
   8   2  -3  191.45    9.95
   8   2  -3  182.61    9.88
  -8  -2   4  401.10   20.72
  -8  -2   4  406.26   20.78
   8   2  -4  457.65   22.30
   8   2  -4  444.66   22.09
  -8  -2   5  254.04   13.16
  -8  -2   5  238.78   12.69
   8   2  -5  271.54   13.65
   8   2  -5  254.43   13.33
  -8  -2   7   13.02    1.35
  -8  -2   7   15.09    1.64
  -8  -2   7    9.97    2.94
  -8  -2   7   13.81    3.05
   8   2  -7   13.94    1.46
   8   2  -7   14.76    1.62
   8   2  -7    8.38    3.73
   8   2  -7   16.46    3.90
  -8  -2   8   21.42    1.87
  -8  -2   8   26.08    2.21
  -8  -2   8   21.33    4.06
  -8  -2   8   21.98    4.12
   8   2  -8   27.37    2.17
   8   2  -8   26.37    2.29
   8   2  -8   25.54    5.03
   8   2  -8   25.93    5.03
  -8  -2   9    2.62    0.74
  -8  -2   9    0.53    0.79
  -8  -2   9    2.71    1.48
  -8  -2   9    0.95    1.40
   8   2  -9    3.21    0.96
   8   2  -9    1.55    1.05
   8   2  -9    3.05    2.82
   8   2  -9    2.94    2.56
  -8  -2  10   57.33    3.65
  -8  -2  10   58.44    3.77
  -8  -2  10   52.05    6.62
  -8  -2  10   51.71    6.70
   8   2 -10   50.97    3.47
   8   2 -10   51.30    3.74
   8   2 -10   56.22    7.92
   8   2 -10   48.86    7.75
  -8  -2  11   95.48    5.41
  -8  -2  11   84.04    5.21
  -8  -2  11   87.49    9.11
  -8  -2  11   81.94    8.99
   8   2 -11   83.90    5.10
   8   2 -11   88.17    5.52
   8   2 -11   83.23   10.48
   8   2 -11   62.39    9.84
  -8  -2  12   56.70    3.81
  -8  -2  12   59.83    4.03
  -8  -2  12   65.15    7.38
  -8  -2  12   66.38    7.56
   8   2 -12   54.76    9.04
  -8  -2  13  100.22    6.08
  -8  -2  13  110.50    6.45
  -8  -2  13  100.10   10.54
  -8  -2  13  109.83   10.85
   8   2 -13  117.55    6.61
   8   2 -13  141.70   14.89
   8   2 -13  116.94   13.21
  -8  -2  14  214.52   11.55
  -8  -2  14  224.11   11.92
  -8  -2  14  208.65   17.79
   8   2 -14  213.00   11.54
   8   2 -14  257.26   22.81
   8   2 -14  219.16   20.98
  -8  -2  15  153.49    8.70
  -8  -2  15  153.60   13.84
   8   2 -15  154.83    8.62
  -8  -2  16   33.89    5.10
   8   2 -16   19.73    6.84
  -8  -1   1   25.49    1.87
  -8  -1   1   24.59    1.81
   8   1  -1   29.44    1.96
   8   1  -1   23.53    1.93
  -8  -1   2    3.71    0.77
   8   1  -2    3.88    0.79
  -8  -1   3   83.34    4.76
  -8  -1   3   83.45    4.69
   8   1  -3   82.12    4.70
   8   1  -3   80.37    4.81
  -8  -1   4   21.93    1.72
  -8  -1   4   20.03    1.77
   8   1  -4   23.96    1.87
   8   1  -4   17.88    1.74
  -8  -1   5  447.63   22.81
  -8  -1   5  457.96   23.06
   8   1  -5  491.58   24.06
   8   1  -5  460.07   23.31
  -8  -1   6  263.86   14.17
  -8  -1   6  303.87   15.28
   8   1  -6  296.09   15.08
   8   1  -6  304.09   15.47
  -8  -1   7  319.44   16.49
  -8  -1   7  301.22   24.19
  -8  -1   7  340.68   25.11
   8   1  -7  375.93   18.14
   8   1  -7  317.75   24.89
   8   1  -7  313.88   25.51
  -8  -1   8  139.62   12.97
  -8  -1   8  158.42   13.38
   8   1  -8  150.91    8.12
   8   1  -8  147.30    8.17
   8   1  -8  137.69   13.29
   8   1  -8  129.50   13.82
  -8  -1   9   28.93    2.30
  -8  -1   9   32.72    2.65
  -8  -1   9   31.43    4.99
  -8  -1   9   38.72    5.21
   8   1  -9   29.70    2.43
   8   1  -9   35.43    2.72
   8   1  -9   30.98    5.38
   8   1  -9   30.48    6.22
  -8  -1  10  123.74   11.99
   8   1 -10  130.63    7.25
   8   1 -10  128.89    7.41
  -8  -1  11  246.38   13.14
  -8  -1  11  250.80   13.32
  -8  -1  11  263.20   20.45
  -8  -1  11  257.67   20.57
   8   1 -11  249.20   13.20
   8   1 -11  272.19   14.14
  -8  -1  12  178.83    9.77
  -8  -1  12  182.35   15.55
  -8  -1  12  173.81   15.63
   8   1 -12  182.75   10.21
   8   1 -12  215.50   18.06
   8   1 -12  177.80   18.04
  -8  -1  13   72.02    4.72
  -8  -1  13   77.05    4.95
   8   1 -13   95.29    5.42
   8   1 -13  101.65   11.22
   8   1 -13   87.11   11.92
  -8  -1  14   13.20    1.51
  -8  -1  14   12.04    1.86
  -8  -1  14   12.68    3.35
   8   1 -14   13.61    1.67
   8   1 -14   23.41    7.32
  -8  -1  15    1.29    1.04
   8   1 -15    0.76    0.73
   8   1 -15   -2.38    3.92
   8   1 -15    3.03    6.50
  -8  -1  16    2.90    1.68
   8   1 -16    1.90    4.07
   8   1 -16    2.87    5.71
  -8  -1  17   19.91    3.88
   8   1 -17   11.90    5.35
  -8   0   1   26.41    1.90
   8   0  -1   28.97    2.08
  -8   0   2  876.85   44.77
  -8   0   2  956.56   46.90
   8   0  -2 1028.56   48.99
   8   0  -2  982.62   47.81
  -8   0   3  854.26   42.76
   8   0  -3  932.33   45.00
  -8   0   4  233.95   12.11
  -8   0   4  231.29   12.00
   8   0  -4  238.27   12.21
   8   0  -4  233.95   12.22
  -8   0   5  522.04   26.12
  -8   0   5  519.95   26.05
   8   0  -5  533.32   26.45
   8   0  -5  523.84   26.31
  -8   0   6  231.61   12.24
   8   0  -6  254.54   13.04
  -8   0   7  111.16    6.30
  -8   0   7  112.07    6.39
  -8   0   7  117.28   11.26
   8   0  -7  129.44    6.90
   8   0  -7  109.90    6.44
   8   0  -7  117.30   11.23
  -8   0   8  161.27    8.76
  -8   0   8  160.75    8.80
  -8   0   8  158.01   14.33
  -8   0   8  172.57   14.48
   8   0  -8  171.61    9.08
   8   0  -8  167.72    9.10
   8   0  -8  159.78   14.37
   8   0  -8  165.05   16.01
  -8   0   9   31.23    2.36
  -8   0   9   30.39    2.44
  -8   0   9   29.60    4.97
   8   0  -9   34.39    2.56
   8   0  -9   32.03    2.54
   8   0  -9   35.29    6.99
  -8   0  10    0.39    0.55
  -8   0  10    0.21    0.97
  -8   0  10   -0.54    1.10
  -8   0  10   -0.58    1.01
   8   0 -10    0.52    0.76
   8   0 -10    0.67    0.75
   8   0 -10   -1.02    1.56
  -8   0  11    4.12    0.89
  -8   0  11    3.95    1.21
  -8   0  11    3.54    2.05
  -8   0  11    2.87    1.97
   8   0 -11    4.76    1.03
   8   0 -11    4.78    1.19
   8   0 -11    5.88    2.45
   8   0 -11    5.69    5.14
  -8   0  12    0.83    0.64
  -8   0  12    0.31    1.05
  -8   0  12    1.89    1.44
   8   0 -12    0.68    0.76
   8   0 -12    0.55    0.93
   8   0 -12    2.18    5.30
  -8   0  13  180.79   10.19
  -8   0  13  182.92   10.33
  -8   0  13  214.03   17.34
   8   0 -13  205.91   10.92
   8   0 -13  219.07   18.29
   8   0 -13  264.76   23.69
  -8   0  14  206.06   19.03
   8   0 -14  251.48   13.10
   8   0 -14  291.42   22.51
   8   0 -14  278.47   24.86
  -8   0  15   83.46    5.23
  -8   0  15   88.86    5.58
  -8   0  15   84.25    9.20
   8   0 -15   98.15    5.71
   8   0 -15   95.41   11.26
  -8   0  16   59.46    4.45
  -8   0  16   63.16    7.16
   8   0 -16   55.36    3.82
   8   0 -16   41.07    8.17
   8   0 -16   52.93   11.19
  -8   0  17   56.78    6.82
   8   0 -17   41.44    8.07
  -8   1   1   28.00    1.94
  -8   1   1   27.86    1.93
   8  -1  -1   31.88    2.06
   8  -1  -1   27.93    2.03
  -8   1   2   43.27    2.69
   8  -1  -2   40.69    2.72
  -8   1   3   69.64    4.03
  -8   1   3   62.76    3.84
   8  -1  -3   78.33    4.31
   8  -1  -3   67.65    4.08
  -8   1   4    3.80    0.69
  -8   1   4    3.04    0.89
   8  -1  -4    3.85    0.80
  -8   1   5    5.39    0.83
  -8   1   5    7.47    1.10
   8  -1  -5    4.67    1.00
   8  -1  -5    5.94    1.02
  -8   1   6    8.36    1.04
  -8   1   6    7.58    1.25
   8  -1  -6   11.68    1.27
   8  -1  -6    9.01    1.23
  -8   1   7   27.02    2.14
  -8   1   7   33.27    2.51
   8  -1  -7   30.24    2.32
   8  -1  -7   36.34    2.58
  -8   1   8  198.68   10.60
  -8   1   8  177.61   16.35
  -8   1   8  219.16   17.04
   8  -1  -8  207.76   10.81
   8  -1  -8  199.64   16.63
   8  -1  -8  208.12   18.83
  -8   1   9  137.32    7.73
  -8   1   9  150.99    8.19
  -8   1   9  138.08   13.15
  -8   1   9  151.92   13.19
   8  -1  -9  142.45    7.89
   8  -1  -9  145.36    8.09
   8  -1  -9  151.85   13.33
   8  -1  -9  156.89   15.55
  -8   1  10  217.00   11.59
  -8   1  10  199.84   17.94
  -8   1  10  228.77   18.37
   8  -1 -10  230.89   12.10
   8  -1 -10  230.95   12.12
   8  -1 -10  228.86   18.53
   8  -1 -10  252.74   21.70
  -8   1  11  321.52   16.99
  -8   1  11  321.09   17.04
  -8   1  11  325.56   25.81
  -8   1  11  354.87   26.23
   8  -1 -11  361.95   18.16
   8  -1 -11  357.33   18.15
   8  -1 -11  347.33   26.23
   8  -1 -11  390.06   30.21
  -8   1  12  171.80    9.44
  -8   1  12  188.81   10.01
  -8   1  12  165.92   15.31
  -8   1  12  186.04   15.52
   8  -1 -12  174.37    9.52
   8  -1 -12  169.90    9.55
   8  -1 -12  181.88   15.75
   8  -1 -12  191.08   19.12
  -8   1  13  150.60    8.29
  -8   1  13  139.34    8.21
  -8   1  13  148.95   13.84
  -8   1  13  142.98   13.35
   8  -1 -13  148.78    8.47
   8  -1 -13  149.42    8.51
   8  -1 -13  171.20   14.66
   8  -1 -13  156.92   18.53
  -8   1  14   98.60    6.05
  -8   1  14  106.27    6.37
  -8   1  14   96.55   10.86
  -8   1  14  120.16   11.20
   8  -1 -14  115.20    6.55
   8  -1 -14  136.71   12.48
   8  -1 -14  129.35   16.69
  -8   1  15   51.54    3.62
  -8   1  15   58.13    7.32
   8  -1 -15   70.44    8.43
   8  -1 -15   68.96   13.59
  -8   1  16   -0.20    1.13
  -8   1  16    2.67    1.65
   8  -1 -16    0.33    0.81
   8  -1 -16    4.57    3.01
   8  -1 -16    5.50    8.43
  -8   1  17    5.56    2.14
   8  -1 -17    1.82    3.22
  -8   2   1  205.46   10.66
  -8   2   1  206.56   10.67
   8  -2  -1  217.40   10.97
   8  -2  -1  222.70   11.24
  -8   2   2  121.95    6.55
  -8   2   2  120.47    6.52
   8  -2  -2  122.59    6.57
   8  -2  -2  133.06    6.99
  -8   2   3    9.02    0.96
   8  -2  -3    9.51    1.11
  -8   2   4  292.32   15.20
  -8   2   4  304.99   15.58
   8  -2  -4  336.38   16.49
   8  -2  -4  305.85   15.67
  -8   2   5  550.46   27.44
  -8   2   5  542.02   27.21
   8  -2  -5  555.91   27.59
   8  -2  -5  560.94   27.84
  -8   2   6  370.79   19.12
  -8   2   6  379.56   19.41
   8  -2  -6  423.54   20.64
   8  -2  -6  393.78   19.88
  -8   2   7  176.91    9.52
   8  -2  -7  194.10   10.12
  -8   2   8  183.69    9.97
  -8   2   8  192.40   10.28
  -8   2   8  202.93   16.79
  -8   2   8  201.69   16.35
   8  -2  -8  197.31   10.37
   8  -2  -8  192.90   10.32
   8  -2  -8  191.25   16.06
   8  -2  -8  201.39   18.68
  -8   2   9  158.32    8.91
  -8   2   9  168.38    9.27
  -8   2   9  175.92   15.45
  -8   2   9  198.68   15.61
   8  -2  -9  190.48    9.86
   8  -2  -9  164.32    9.21
   8  -2  -9  187.95   15.36
   8  -2  -9  198.38   18.15
  -8   2  10   40.13    2.83
  -8   2  10   40.81    2.98
  -8   2  10   40.71    5.97
  -8   2  10   38.48    5.56
   8  -2 -10   44.31    3.01
   8  -2 -10   38.59    2.91
   8  -2 -10   44.23    5.79
   8  -2 -10   45.08    8.90
  -8   2  11   33.21    2.58
  -8   2  11   34.36    2.76
  -8   2  11   38.36    5.78
  -8   2  11   40.28    5.44
   8  -2 -11   39.09    2.81
   8  -2 -11   36.53    2.83
   8  -2 -11   42.74    5.62
   8  -2 -11   41.87    9.18
  -8   2  12    8.98    1.24
  -8   2  12    8.72    1.46
  -8   2  12    9.69    2.94
  -8   2  12    8.13    2.58
   8  -2 -12    8.85    1.33
   8  -2 -12    7.78    1.38
   8  -2 -12   10.85    2.83
   8  -2 -12   13.04    7.47
  -8   2  13    1.03    0.77
  -8   2  13    1.00    1.14
  -8   2  13    2.23    1.78
  -8   2  13    2.25    1.52
   8  -2 -13    2.39    1.76
   8  -2 -13   -3.48    7.75
  -8   2  14   34.15    2.81
  -8   2  14   34.13    5.66
  -8   2  14   33.18    5.26
   8  -2 -14   34.15    2.72
   8  -2 -14   39.06    5.74
   8  -2 -14   39.57   11.50
  -8   2  15   21.19    2.01
  -8   2  15   23.91    2.35
  -8   2  15   21.83    4.59
   8  -2 -15   23.48    2.16
   8  -2 -15   26.70    5.06
   8  -2 -15   25.13   11.44
  -8   2  16   30.78    2.89
  -8   2  16   34.90    5.29
   8  -2 -16   29.49    2.52
   8  -2 -16   33.69    5.73
   8  -2 -16   35.70   13.16
  -8   2  17   84.95    9.02
   8  -2 -17   74.81    9.20
   8  -2 -17   56.23   13.69
  -8   2  18  108.45   10.49
   8  -2 -18   80.87   10.25
  -8   3   1  465.56   23.54
   8  -3  -1  519.59   25.06
  -8   3   2   11.66    1.01
  -8   3   2   11.07    1.07
   8  -3  -2   10.87    1.01
   8  -3  -2    9.10    1.04
  -8   3   3  433.34   21.88
  -8   3   3  435.51   21.95
   8  -3  -3  475.72   23.07
   8  -3  -3  446.04   22.33
  -8   3   4  253.99   13.08
  -8   3   4  254.91   13.14
   8  -3  -4  275.37   13.70
   8  -3  -4  256.68   13.24
  -8   3   5  163.98    8.73
   8  -3  -5  166.61    8.78
  -8   3   6  360.58   18.41
  -8   3   6  356.81   18.34
   8  -3  -6  391.35   19.30
   8  -3  -6  374.58   18.89
  -8   3   7    1.98    0.64
  -8   3   7    5.51    1.04
  -8   3   7    5.15    1.93
  -8   3   7    2.15    1.50
   8  -3  -7    2.41    0.76
   8  -3  -7    4.70    0.91
   8  -3  -7    4.24    1.54
   8  -3  -7   -2.07    6.13
  -8   3   8  195.14   10.47
  -8   3   8  208.14   10.92
  -8   3   8  195.20   17.05
  -8   3   8  211.54   17.00
   8  -3  -8  204.76   10.78
   8  -3  -8  216.19   11.14
   8  -3  -8  207.46   16.83
   8  -3  -8  184.19   19.15
  -8   3   9   52.34    3.46
  -8   3   9   59.16    3.76
  -8   3   9   54.40    7.06
  -8   3   9   57.56    6.76
   8  -3  -9   54.31    3.55
   8  -3  -9   53.21    6.65
   8  -3  -9   61.38   10.20
  -8   3  10   32.87    2.52
  -8   3  10   37.03    2.86
  -8   3  10   33.61    5.55
  -8   3  10   39.40    5.30
   8  -3 -10   34.27    2.63
   8  -3 -10   41.73    2.93
   8  -3 -10   37.46    5.29
   8  -3 -10   41.45    8.99
  -8   3  11   80.95    4.91
  -8   3  11   73.02    9.05
  -8   3  11   89.87    8.96
   8  -3 -11   84.29    5.11
   8  -3 -11   87.62    8.93
   8  -3 -11   81.27   12.73
  -8   3  12  128.78    7.44
  -8   3  12  119.51   12.45
  -8   3  12  134.32   12.30
   8  -3 -12  130.83    7.41
   8  -3 -12  146.40   12.62
   8  -3 -12  154.17   17.54
  -8   3  13  125.51    7.36
  -8   3  13  135.49    7.81
  -8   3  13  135.73   13.25
  -8   3  13  143.82   12.86
   8  -3 -13  137.94    7.77
   8  -3 -13  143.84    8.00
   8  -3 -13  153.68   13.21
   8  -3 -13  148.04   18.71
  -8   3  14  180.78   10.22
  -8   3  14  192.71   10.74
  -8   3  14  184.39   17.05
  -8   3  14  218.91   17.31
   8  -3 -14  211.34   11.15
   8  -3 -14  218.69   17.49
   8  -3 -14  246.19   25.10
  -8   3  15  147.19    8.12
  -8   3  15  137.65    8.08
  -8   3  15  143.30   13.66
   8  -3 -15  135.17    7.82
   8  -3 -15  188.45   22.13
  -8   3  16   28.69    2.36
  -8   3  16   23.89    2.61
  -8   3  16   28.09    4.73
   8  -3 -16   25.61    2.30
   8  -3 -16   28.15    5.10
   8  -3 -16   30.31   13.61
  -8   3  17   62.50    4.59
   8  -3 -17   65.03    4.32
  -8   3  18   75.51    8.27
   8  -3 -18   60.28    8.15
  -8   4   1   81.58    4.48
  -8   4   1   83.86    4.59
   8  -4  -1   91.37    4.77
   8  -4  -1   93.75    4.88
  -8   4   2   21.89    1.53
  -8   4   2   20.27    1.56
   8  -4  -2   22.40    1.53
   8  -4  -2   20.11    1.56
  -8   4   3    5.72    0.70
  -8   4   3    3.48    0.76
   8  -4  -3    6.46    0.73
   8  -4  -3    5.07    0.80
  -8   4   4  109.41    6.11
   8  -4  -4  129.77    6.79
  -8   4   5  165.23    8.72
  -8   4   5  157.60    8.59
   8  -4  -5  167.94    8.82
   8  -4  -5  178.61    9.19
  -8   4   6  178.58    9.67
  -8   4   6  192.13   10.13
   8  -4  -6  199.39   10.28
   8  -4  -6  202.69   10.42
  -8   4   7  379.67   19.75
  -8   4   7  377.43   19.78
  -8   4   7  407.65   30.32
  -8   4   7  411.86   30.08
   8  -4  -7  420.11   20.92
   8  -4  -7  408.90   20.63
   8  -4  -7  449.24   30.85
   8  -4  -7  441.57   34.53
  -8   4   8  612.48   30.70
  -8   4   8  608.02   43.60
  -8   4   8  635.44   43.87
   8  -4  -8  609.26   30.66
   8  -4  -8  649.63   44.09
   8  -4  -8  631.05   47.18
  -8   4   9  252.12   13.24
  -8   4   9  234.30   12.75
  -8   4   9  248.25   20.49
  -8   4   9  254.57   20.19
   8  -4  -9  264.02   13.51
   8  -4  -9  256.91   13.33
   8  -4  -9  278.29   20.67
   8  -4  -9  257.40   23.73
  -8   4  10   10.10    1.27
  -8   4  10   10.63    1.46
  -8   4  10   11.64    3.25
  -8   4  10   10.90    2.82
   8  -4 -10   14.33    1.47
   8  -4 -10   11.70    1.49
   8  -4 -10   11.50    2.85
   8  -4 -10   20.22    8.18
  -8   4  11   61.78    3.98
  -8   4  11   61.34    4.20
  -8   4  11   65.14    8.11
  -8   4  11   66.43    7.65
   8  -4 -11   69.73    4.32
   8  -4 -11   70.54    4.36
   8  -4 -11   75.10    7.80
   8  -4 -11   87.79   13.15
  -8   4  12  339.01   17.79
  -8   4  12  342.87   18.09
  -8   4  12  340.06   27.01
  -8   4  12  368.43   27.10
   8  -4 -12  367.77   18.68
   8  -4 -12  354.88   18.31
   8  -4 -12  370.94   27.11
   8  -4 -12  435.74   34.33
  -8   4  13  133.83    7.67
  -8   4  13  132.71    7.93
  -8   4  13  149.44   13.90
  -8   4  13  156.54   13.44
   8  -4 -13  150.51    8.29
   8  -4 -13  141.42    8.06
   8  -4 -13  159.75   13.51
   8  -4 -13  166.73   19.88
  -8   4  14   37.51    2.84
  -8   4  14   33.60    2.99
  -8   4  14   46.04    6.35
  -8   4  14   37.89    5.53
   8  -4 -14   35.40    2.81
   8  -4 -14   37.48    3.02
   8  -4 -14   48.25    5.83
   8  -4 -14   45.01   13.25
  -8   4  15    0.37    0.77
  -8   4  15    2.57    1.18
  -8   4  15    2.82    2.00
  -8   4  15    1.99    1.53
   8  -4 -15    0.91    0.89
   8  -4 -15    1.65    1.67
   8  -4 -15    5.65   10.73
  -8   4  16    1.15    0.75
  -8   4  16    0.28    1.19
  -8   4  16    0.37    1.33
   8  -4 -16   -0.29    0.89
   8  -4 -16   -0.29    1.56
   8  -4 -16   -5.03   12.48
  -8   4  17   27.22    2.82
  -8   4  17   26.34    4.51
   8  -4 -17   18.99    2.18
  -8   4  18   34.77    5.22
   8  -4 -18   28.39    5.41
  -8   5   2  411.20   20.48
  -8   5   2  410.79   20.54
   8  -5  -2  430.18   21.05
   8  -5  -2  411.24   20.54
  -8   5   3  650.37   32.67
  -8   5   3  686.40   33.77
   8  -5  -3  712.87   34.45
   8  -5  -3  677.40   33.49
  -8   5   4  685.30   33.93
  -8   5   4  654.36   33.20
   8  -5  -4  709.36   34.66
   8  -5  -4  729.82   35.29
  -8   5   5  593.01   29.62
  -8   5   5  584.07   29.51
   8  -5  -5  622.39   30.49
   8  -5  -5  622.86   30.54
  -8   5   6  241.82   13.00
  -8   5   6  266.58   21.24
  -8   5   6  252.00   20.84
   8  -5  -6  269.68   13.68
   8  -5  -6  291.31   21.31
   8  -5  -6  264.75   26.02
  -8   5   7   10.99    1.21
  -8   5   7    8.90    1.30
  -8   5   7   12.64    3.15
  -8   5   7    9.88    3.01
   8  -5  -7   10.75    1.25
   8  -5  -7   10.74    1.29
   8  -5  -7   14.95    2.85
   8  -5  -7   11.24    8.22
  -8   5   8    3.47    0.78
  -8   5   8    2.79    0.97
  -8   5   8    6.07    2.25
  -8   5   8    6.05    1.96
   8  -5  -8    3.17    0.83
   8  -5  -8    4.05    0.96
   8  -5  -8    6.53    1.83
   8  -5  -8   12.02    7.72
  -8   5   9   22.90    1.93
  -8   5   9   21.88    2.08
  -8   5   9   27.16    4.68
   8  -5  -9   23.59    2.03
   8  -5  -9   25.33    2.11
   8  -5  -9   27.73    9.10
  -8   5  10    0.72    0.62
  -8   5  10   -0.22    0.81
  -8   5  10    0.54    1.54
  -8   5  10    0.41    0.92
   8  -5 -10    0.20    0.62
   8  -5 -10    0.38    0.85
   8  -5 -10   -0.37    0.83
   8  -5 -10    1.59    8.36
  -8   5  11    5.23    1.00
  -8   5  11    7.68    1.33
  -8   5  11    7.54    2.83
  -8   5  11    8.70    2.24
   8  -5 -11    4.23    1.05
   8  -5 -11    7.80    1.30
   8  -5 -11    6.16    2.20
   8  -5 -11   -1.25    8.90
  -8   5  12   15.05    4.08
  -8   5  12   21.02    3.71
   8  -5 -12   16.00    1.76
   8  -5 -12   22.91    2.05
   8  -5 -12   17.68    3.66
   8  -5 -12   39.03   12.18
  -8   5  13   31.06    2.51
  -8   5  13   35.32    2.92
  -8   5  13   31.32    5.65
  -8   5  13   35.30    5.13
   8  -5 -13   30.71    2.55
   8  -5 -13   37.50    2.87
   8  -5 -13   32.70    5.03
   8  -5 -13   43.30   13.05
  -8   5  14  463.55   24.44
  -8   5  14  463.75   36.13
  -8   5  14  522.06   36.80
   8  -5 -14  530.01   26.37
   8  -5 -14  526.57   36.86
   8  -5 -14  682.50   50.12
  -8   5  15  271.74   14.85
  -8   5  15  298.48   15.92
  -8   5  15  264.92   23.11
  -8   5  15  310.25   23.47
   8  -5 -15  317.97   16.18
   8  -5 -15  316.03   23.62
   8  -5 -15  394.01   34.96
  -8   5  16   50.97    3.52
  -8   5  16   40.66    3.88
  -8   5  16   53.65    6.62
   8  -5 -16   47.62    3.55
   8  -5 -16   54.84    6.70
  -8   5  17   98.03    6.60
  -8   5  17  108.66   10.77
   8  -5 -17  111.20    6.57
   8  -5 -17  118.14   11.38
   8  -5 -17   83.53   17.85
  -8   5  18   50.89    6.68
   8  -5 -18   51.67    7.02
  -8   6   1  138.83   12.63
  -8   6   1  134.35   16.37
   8  -6  -1  139.65   12.97
   8  -6  -1  150.10   19.04
  -8   6   2  113.63   11.14
  -8   6   2  103.35   12.95
   8  -6  -2  132.24   11.81
   8  -6  -2  116.19   20.96
  -8   6   3  132.51    7.31
  -8   6   3  148.66   13.21
  -8   6   3  129.77   14.08
   8  -6  -3  154.45    7.85
   8  -6  -3  158.42   13.50
   8  -6  -3  139.57   23.86
  -8   6   4   97.72   11.16
   8  -6  -4  101.19    5.58
   8  -6  -4   94.78    5.39
   8  -6  -4  114.68   10.49
  -8   6   5    9.08    1.01
  -8   6   5    7.28    2.82
  -8   6   5    9.79    3.50
   8  -6  -5   14.07    1.27
   8  -6  -5   10.79    2.81
   8  -6  -5   21.51   14.43
  -8   6   6  140.00    7.70
  -8   6   6  154.87    8.30
  -8   6   6  141.44   13.51
  -8   6   6  128.39   13.54
   8  -6  -6  156.21    8.25
   8  -6  -6  162.08    8.36
   8  -6  -6  172.68   13.93
   8  -6  -6  147.65   20.48
  -8   6   7  176.29    9.61
  -8   6   7  200.76   10.56
  -8   6   7  188.93   16.55
  -8   6   7  180.07   16.46
   8  -6  -7  195.23   10.25
   8  -6  -7  197.67   10.26
   8  -6  -7  208.43   16.52
   8  -6  -7  210.04   23.70
  -8   6   8  136.38    7.56
  -8   6   8  138.86    7.86
  -8   6   8  136.86   13.23
  -8   6   8  150.79   13.51
   8  -6  -8  137.25    7.67
   8  -6  -8  141.66    7.73
   8  -6  -8  162.18   13.30
   8  -6  -8  158.72   19.52
  -8   6   9   78.54    4.82
  -8   6   9   83.86    5.21
  -8   6   9   87.83    9.63
  -8   6   9   91.61    9.44
   8  -6  -9   84.70    5.09
   8  -6  -9   90.45    5.21
   8  -6  -9   95.98    9.23
   8  -6  -9   95.09   15.38
  -8   6  10  112.89    6.54
  -8   6  10  113.07    6.78
  -8   6  10  120.41   11.64
   8  -6 -10  124.52    6.95
   8  -6 -10  122.73    6.88
   8  -6 -10  138.67   11.80
  -8   6  11  325.44   17.36
  -8   6  11  335.87   17.93
  -8   6  11  358.27   27.57
  -8   6  11  359.32   26.94
   8  -6 -11  351.46   18.18
   8  -6 -11  366.02   18.52
   8  -6 -11  394.18   27.62
   8  -6 -11  426.56   35.54
  -8   6  12  377.26   19.90
  -8   6  12  384.51   20.42
  -8   6  12  385.43   30.20
  -8   6  12  423.76   30.54
   8  -6 -12  400.43   20.64
   8  -6 -12  426.36   21.30
   8  -6 -12  444.52   30.88
   8  -6 -12  489.58   40.18
  -8   6  13  166.89    9.47
  -8   6  13  170.81    9.91
  -8   6  13  183.36   16.54
  -8   6  13  198.52   16.15
   8  -6 -13  186.73   10.13
   8  -6 -13  183.16   10.01
   8  -6 -13  202.18   16.08
   8  -6 -13  239.01   25.88
  -8   6  14   20.63    2.01
  -8   6  14   18.17    2.22
  -8   6  14   20.46    4.64
  -8   6  14   21.42    3.98
   8  -6 -14   21.11    2.09
   8  -6 -14   19.13    2.13
   8  -6 -14   24.57    4.01
   8  -6 -14   13.92   14.31
  -8   6  15   30.01    2.86
  -8   6  15   36.56    5.77
  -8   6  15   29.73    4.87
   8  -6 -15   26.46    2.48
   8  -6 -15   33.82    4.93
   8  -6 -15   26.95   15.35
  -8   6  16   80.70    5.20
  -8   6  16   87.01    5.91
  -8   6  16   96.97    9.66
   8  -6 -16   92.54    5.67
   8  -6 -16   99.41    9.68
  -8   6  17    0.24    1.32
  -8   6  17    1.56    1.36
   8  -6 -17    0.63    1.02
   8  -6 -17    0.90    1.63
   8  -6 -17    4.63   11.01
  -8   6  18    5.55    2.20
   8  -6 -18    5.08    2.57
  -8   7   1   14.69    3.18
  -8   7   1    9.61    9.91
   8  -7  -1   13.70    3.70
   8  -7  -1   12.70    9.59
  -8   7   2  221.06   18.15
  -8   7   2  224.39   21.43
  -8   7   3  191.28    9.75
  -8   7   3  188.07   16.25
  -8   7   3  164.40   17.56
   8  -7  -3  200.47   10.05
   8  -7  -3  215.46   17.07
   8  -7  -3  215.01   29.20
  -8   7   4   67.99    3.90
  -8   7   4   69.89    4.18
  -8   7   4   69.27    8.13
  -8   7   4   60.39    9.49
   8  -7  -4   72.24    4.12
   8  -7  -4   78.12    4.28
   8  -7  -4   75.46    8.30
   8  -7  -4  110.71   25.42
  -8   7   5  203.69   10.48
  -8   7   5  195.91   10.54
  -8   7   5  197.73   17.06
  -8   7   5  188.38   17.95
   8  -7  -5  208.99   10.77
   8  -7  -5  209.74   10.72
   8  -7  -5  214.29   17.33
   8  -7  -5  237.02   30.17
  -8   7   6  365.01   18.83
  -8   7   6  366.00   19.16
  -8   7   6  387.12   29.08
  -8   7   6  361.44   29.09
   8  -7  -6  399.86   19.94
   8  -7  -6  392.35   19.63
   8  -7  -6  447.65   30.44
   8  -7  -6  432.23   40.29
  -8   7   7  264.15   13.60
  -8   7   7  242.91   13.28
  -8   7   7  261.33   21.28
  -8   7   7  265.31   21.90
   8  -7  -7  270.87   13.93
   8  -7  -7  271.70   13.83
   8  -7  -7  298.86   21.86
   8  -7  -7  268.25   30.13
  -8   7   8  150.06    8.17
  -8   7   8  141.28    8.23
  -8   7   8  171.63   14.72
   8  -7  -8  165.00    8.78
   8  -7  -8  151.92    8.26
   8  -7  -8  197.68   23.77
  -8   7   9  139.75    8.03
  -8   7   9  144.26    8.48
  -8   7   9  166.74   14.83
  -8   7   9  177.88   15.21
   8  -7  -9  169.32    9.07
   8  -7  -9  154.50    8.46
   8  -7  -9  181.55   14.55
   8  -7  -9  230.08   25.42
  -8   7  10  198.14   11.30
  -8   7  10  213.13   18.54
  -8   7  10  223.88   18.53
   8  -7 -10  222.11   11.79
   8  -7 -10  248.37   18.66
   8  -7 -10  246.81   27.11
  -8   7  11   45.84    3.21
  -8   7  11   41.52    3.39
  -8   7  11   48.24    6.90
  -8   7  11   48.37    6.53
   8  -7 -11   50.78    3.46
   8  -7 -11   46.18    3.31
   8  -7 -11   59.84    6.49
   8  -7 -11   65.91   16.46
  -8   7  12   17.68    1.80
  -8   7  12   19.77    4.30
  -8   7  12   18.25    3.93
   8  -7 -12   18.49    1.95
   8  -7 -12   22.88    3.87
   8  -7 -12   16.91   13.08
  -8   7  13    0.48    0.69
  -8   7  13    1.53    1.08
  -8   7  13    1.99    2.19
  -8   7  13    2.09    1.50
   8  -7 -13    0.65    0.91
   8  -7 -13    3.10    1.42
   8  -7 -13   22.42   14.18
  -8   7  14   28.11    2.38
  -8   7  14   33.20    2.97
  -8   7  14   31.44    5.72
  -8   7  14   30.59    4.92
   8  -7 -14   27.92    2.52
   8  -7 -14   34.25    2.75
   8  -7 -14   30.80    4.84
   8  -7 -14   41.52   15.45
  -8   7  15   56.38    3.96
  -8   7  15   67.22    4.72
   8  -7 -15   66.67    4.36
   8  -7 -15   74.22   18.85
  -8   7  16   64.65    4.29
  -8   7  16   70.63    5.08
  -8   7  16   68.84    7.87
   8  -7 -16   68.09    4.55
   8  -7 -16   68.17    7.79
   8  -7 -16   47.82   20.38
  -8   7  17   61.12    4.76
  -8   7  17   55.61    6.96
   8  -7 -17   51.58    3.82
   8  -7 -17   54.50    6.91
   8  -7 -17   83.31   18.54
  -8   7  18   70.44    8.29
   8  -7 -18   79.02    8.59
  -8   8   1  314.22   24.00
  -8   8   1  228.52   28.87
   8  -8  -1  340.48   25.24
   8  -8  -1  353.74   31.68
  -8   8   2  292.48   23.26
  -8   8   2  307.43   28.64
   8  -8  -2  317.90   24.32
   8  -8  -2  328.18   34.67
  -8   8   3  246.59   20.05
  -8   8   3  220.12   22.43
   8  -8  -3  276.61   21.08
   8  -8  -3  284.34   35.78
  -8   8   4   74.58    4.56
  -8   8   4   86.55    9.07
  -8   8   4   87.23   11.60
   8  -8  -4   90.66    4.82
   8  -8  -4   80.16    4.49
  -8   8   5   45.87    2.79
  -8   8   5   40.64    3.00
  -8   8   5   53.33    6.50
  -8   8   5   37.32    7.77
   8  -8  -5   54.22    6.54
   8  -8  -5   38.76   22.61
  -8   8   6  146.54    7.86
  -8   8   6  138.51    8.03
  -8   8   6  167.10   14.28
  -8   8   6  149.24   15.10
   8  -8  -6  157.89    8.39
   8  -8  -6  151.57    8.07
   8  -8  -6  206.18   31.39
  -8   8   7   59.73    4.20
  -8   8   7   78.39    8.54
  -8   8   7   74.72    9.52
   8  -8  -7   69.26    4.29
   8  -8  -7   82.08    8.37
   8  -8  -7   93.76   22.48
  -8   8   8    8.92    1.13
  -8   8   8    9.47    1.47
  -8   8   8   10.92    3.09
  -8   8   8   18.66    4.20
   8  -8  -8    8.68    1.34
   8  -8  -8   10.52    1.30
   8  -8  -8   10.48    2.82
   8  -8  -8   40.21   18.11
  -8   8   9   97.00    5.88
  -8   8   9  117.37   11.90
   8  -8  -9  119.20    6.54
   8  -8  -9  122.45   11.13
  -8   8  10   50.04    3.63
  -8   8  10   59.39    4.13
  -8   8  10   52.49    7.38
  -8   8  10   60.39    7.56
   8  -8 -10   54.65    3.75
   8  -8 -10   60.02    3.82
   8  -8 -10   59.67    6.98
   8  -8 -10   74.14   18.98
  -8   8  11  133.70   13.37
  -8   8  11  138.91   13.40
   8  -8 -11  140.30    7.96
   8  -8 -11  146.97    8.02
   8  -8 -11  144.48   12.93
   8  -8 -11  196.35   25.92
  -8   8  12  242.68   13.75
  -8   8  12  285.17   23.27
  -8   8  12  310.37   23.46
   8  -8 -12  303.15   15.44
   8  -8 -12  316.92   23.13
   8  -8 -12  381.46   36.90
  -8   8  13  184.69   10.82
  -8   8  13  197.61   16.97
   8  -8 -13  205.24   11.09
   8  -8 -13  215.48   17.04
  -8   8  14   69.36    4.66
  -8   8  14   69.31    5.17
  -8   8  14   93.16    9.99
  -8   8  14   86.18    9.01
   8  -8 -14   80.49    5.15
   8  -8 -14   80.67    5.06
   8  -8 -14   92.47    8.90
   8  -8 -14   92.02   20.96
  -8   8  15  197.89   11.08
  -8   8  15  211.14   12.10
  -8   8  15  221.78   19.05
  -8   8  15  223.07   18.16
   8  -8 -15  213.02   11.63
   8  -8 -15  222.62   17.87
   8  -8 -15  292.73   34.01
  -8   8  16  124.43    7.18
  -8   8  16  121.15    7.77
  -8   8  16  116.86   11.69
   8  -8 -16  128.82    7.52
   8  -8 -16  131.35   11.89
   8  -8 -16  117.30   23.19
  -8   8  17   52.86    3.84
  -8   8  17   48.36    4.24
   8  -8 -17   20.75   14.17
  -8   8  18   98.45   10.59
   8  -8 -18  116.01    6.97
   8  -8 -18  120.06   11.12
  -8   9   1    0.71    1.21
  -8   9   1   -0.54   12.77
   8  -9  -1    4.04    2.53
   8  -9  -1   11.32   11.34
  -8   9   2    1.00    1.17
  -8   9   2    3.94   13.24
   8  -9  -2    0.22    2.20
   8  -9  -2   -7.46   16.08
  -8   9   3   16.13    3.51
  -8   9   3   11.36    9.63
   8  -9  -3   15.26    4.06
   8  -9  -3   16.80   18.00
  -8   9   4    1.42    0.31
  -8   9   4    1.98    1.48
  -8   9   4   -2.24    6.83
   8  -9  -4    3.51    2.11
   8  -9  -4    2.43   21.98
  -8   9   5   70.77    9.14
  -8   9   5   78.15   11.99
   8  -9  -5  105.70    5.54
   8  -9  -5  100.93    5.31
   8  -9  -5   93.29    9.82
   8  -9  -5   98.71   32.18
  -8   9   6  153.22    8.12
  -8   9   6  135.71   13.61
  -8   9   6  151.93   16.15
   8  -9  -6  158.96    8.30
   8  -9  -6  176.45   14.59
   8  -9  -6  168.28   35.90
  -8   9   7  187.59   10.07
  -8   9   7  190.54   10.61
  -8   9   7  197.67   17.04
  -8   9   7  189.94   18.30
   8  -9  -7  189.64   10.30
   8  -9  -7  204.00   10.52
   8  -9  -7  224.24   17.49
   8  -9  -7  193.94   36.87
  -8   9   8  356.27   18.75
  -8   9   8  350.51   19.05
  -8   9   8  388.88   29.65
  -8   9   8  363.88   29.77
   8  -9  -8  414.96   20.64
   8  -9  -8  413.69   20.36
   8  -9  -8  427.77   30.01
   8  -9  -8  542.93   51.88
  -8   9   9  259.73   13.72
  -8   9   9  244.52   13.78
  -8   9   9  264.61   21.79
  -8   9   9  277.44   22.88
   8  -9  -9  265.85   14.11
   8  -9  -9  280.34   14.29
   8  -9  -9  314.97   22.58
   8  -9  -9  347.30   39.76
  -8   9  10  159.15    8.80
  -8   9  10  144.72    8.87
  -8   9  10  157.22   14.85
  -8   9  10  179.89   15.93
   8  -9 -10  164.60    9.15
   8  -9 -10  170.09    9.08
   8  -9 -10  177.55   14.75
   8  -9 -10  234.33   32.52
  -8   9  11   50.50    3.51
  -8   9  11   46.15    3.84
  -8   9  11   68.82    7.82
   8  -9 -11   52.21    3.75
   8  -9 -11   64.09    3.98
   8  -9 -11  100.81   23.42
  -8   9  12   86.18    5.52
  -8   9  12   89.56    6.19
  -8   9  12  109.49   11.20
  -8   9  12  115.61   11.14
   8  -9 -12  102.15    6.22
   8  -9 -12  107.79    6.19
   8  -9 -12  114.55   10.46
   8  -9 -12  140.22   26.07
  -8   9  13  220.56   12.91
  -8   9  13  275.39   21.58
  -8   9  13  276.42   20.93
   8  -9 -13  208.94   12.00
   8  -9 -13  238.58   12.78
   8  -9 -13  270.05   20.19
   8  -9 -13  354.13   37.94
  -8   9  14   19.70    2.04
  -8   9  14   20.18    2.69
   8  -9 -14   23.99    2.32
   8  -9 -14   22.74    2.31
   8  -9 -14   28.76    4.26
   8  -9 -14   12.72   17.26
  -8   9  15   17.93    1.95
  -8   9  15   19.02    2.59
  -8   9  15   22.04    4.13
   8  -9 -15   17.52    2.11
   8  -9 -15   23.17    3.91
   8  -9 -15   26.05   19.26
  -8   9  16    1.03    1.16
   8  -9 -16    0.03    0.97
   8  -9 -16   -0.46    1.24
   8  -9 -16   -6.63   16.53
  -8   9  17   50.77    3.71
  -8   9  17   56.91    4.70
  -8   9  17   54.16    6.86
   8  -9 -17   53.00    3.94
  -8   9  18   71.44    5.69
  -8   9  18   75.15    8.57
   8  -9 -18   78.18    5.32
   8  -9 -18   85.69    8.76
   8 -10  -1   88.51   10.13
   8 -10  -1   91.74   17.89
  -8  10   2   51.27   18.47
   8 -10  -2   67.71    8.43
   8 -10  -2   67.81   21.79
  -8  10   3  181.00   24.32
   8 -10  -3  214.53   18.06
  -8  10   4   58.86   13.63
   8 -10  -4   95.14    9.93
  -8  10   5  181.80    9.44
  -8  10   5  166.96   19.32
   8 -10  -5  182.62    9.58
   8 -10  -5  213.88   17.08
   8 -10  -5  172.69   44.37
  -8  10   6  323.76   16.12
  -8  10   6  296.40   15.95
  -8  10   6  302.62   24.18
  -8  10   6  298.16   26.81
   8 -10  -6  313.05   16.02
   8 -10  -6  313.97   15.88
   8 -10  -6  334.71   25.01
   8 -10  -6  414.43   57.75
  -8  10   7  111.23    6.16
  -8  10   7  102.61    6.56
  -8  10   7  116.11   11.46
  -8  10   7  109.13   13.69
   8 -10  -7  112.34    6.43
   8 -10  -7  109.23    6.12
   8 -10  -7  131.35   11.71
   8 -10  -7  178.86   40.00
  -8  10   8    1.52    0.75
  -8  10   8    1.77    1.27
  -8  10   8    3.20    1.96
  -8  10   8    0.30    3.97
   8 -10  -8    2.56    0.90
   8 -10  -8    2.27    0.96
   8 -10  -8    3.01    2.00
   8 -10  -8  -55.59   31.24
  -8  10   9    8.70    1.19
  -8  10   9    4.99    1.42
  -8  10   9    9.23    2.92
  -8  10   9    7.95    4.58
   8 -10  -9    7.07    1.30
   8 -10  -9    5.74    1.25
   8 -10  -9    8.84    2.67
   8 -10  -9   22.59   29.28
  -8  10  10   34.37    2.62
  -8  10  10   34.47    3.19
  -8  10  10   40.03    6.01
   8 -10 -10   35.04    2.85
   8 -10 -10   35.94    2.70
   8 -10 -10   47.38   25.61
  -8  10  11    3.25    0.94
  -8  10  11    3.65    1.46
  -8  10  11    4.76    2.53
  -8  10  11    2.88    3.12
   8 -10 -11    4.36    1.19
   8 -10 -11    4.68    1.29
   8 -10 -11    5.01    2.07
   8 -10 -11    8.04   21.96
  -8  10  12   15.92    1.80
  -8  10  12   22.81    2.66
  -8  10  12   19.78    4.65
   8 -10 -12   19.25    2.13
   8 -10 -12   26.78    2.28
   8 -10 -12   18.28    3.83
   8 -10 -12   41.74   23.07
  -8  10  13   50.68    3.69
  -8  10  13   59.49    4.54
   8 -10 -13   55.23    4.05
   8 -10 -13   57.26    3.90
   8 -10 -13   64.03    7.14
   8 -10 -13   72.93   24.73
  -8  10  14   83.47    5.41
  -8  10  14   98.66    6.62
  -8  10  14   99.17   10.79
   8 -10 -14   92.02    5.87
   8 -10 -14  101.32    5.95
   8 -10 -14  136.37   28.03
  -8  10  15  149.28    8.68
  -8  10  15  159.95    9.88
  -8  10  15  176.47   15.05
   8 -10 -15  171.54    9.62
  -8  10  16  184.49   10.62
  -8  10  16  191.26   11.72
  -8  10  16  227.29   18.09
   8 -10 -16  213.49   11.74
   8 -10 -16  233.58   17.89
   8 -10 -16  235.91   33.79
  -8  10  17   94.42    5.98
  -8  10  17  100.99    7.04
  -8  10  17  104.22   10.53
   8 -10 -17  100.43    6.44
   8 -10 -17  115.39   10.59
  -8  10  18   67.00    5.49
  -8  10  18   71.75    8.55
   8 -10 -18   80.99    5.48
   8 -10 -18   97.07    9.12
  -8  11   1  107.93   10.77
  -8  11   1   50.12   27.06
   8 -11  -1  114.90   11.88
   8 -11  -1  113.47   18.49
  -8  11   2   46.93    6.23
  -8  11   2    6.80   21.49
   8 -11  -2   44.90    7.07
   8 -11  -2   39.24   19.13
  -8  11   3   38.81    5.67
  -8  11   3   36.83   19.36
   8 -11  -3   37.09    6.36
   8 -11  -3   50.14   24.65
  -8  11   4   19.70    4.12
  -8  11   4   40.41   13.05
   8 -11  -4   24.65    4.94
   8 -11  -4   37.16   27.52
  -8  11   5    5.62    0.61
  -8  11   5    8.10    2.47
  -8  11   5   10.60    9.00
   8 -11  -5    6.82    3.08
   8 -11  -5    9.06   32.57
  -8  11   6    8.45    0.91
  -8  11   6    6.99    0.93
  -8  11   6    4.66    2.64
  -8  11   6    9.12    7.91
   8 -11  -6    9.37    1.25
   8 -11  -6    8.19    1.12
   8 -11  -6    7.34    3.06
   8 -11  -6    2.82   35.45
  -8  11   7   84.28    4.89
  -8  11   7   86.44    5.80
  -8  11   7   80.72    9.48
  -8  11   7   78.23   13.06
   8 -11  -7   89.40    5.29
   8 -11  -7   86.98    5.00
   8 -11  -7  101.83   10.02
   8 -11  -7  126.75   45.92
  -8  11   8   83.95    4.94
  -8  11   8   82.31    5.69
  -8  11   8   79.64    9.39
  -8  11   8   66.66   11.44
   8 -11  -8   89.47    5.34
   8 -11  -8   86.71    5.03
   8 -11  -8   91.59    9.62
   8 -11  -8  103.17   39.79
  -8  11   9   58.99    3.83
  -8  11   9   59.90    4.60
  -8  11   9   66.88    8.14
   8 -11  -9   64.49    4.28
   8 -11  -9   61.13    3.98
   8 -11  -9   70.58    7.99
   8 -11  -9  122.69   40.21
  -8  11  10   79.35    4.98
  -8  11  10   81.27    5.77
  -8  11  10   83.09    9.73
  -8  11  10   97.96   11.56
   8 -11 -10   85.32    5.40
   8 -11 -10   85.53    5.15
   8 -11 -10   99.05    9.62
   8 -11 -10  107.05   32.55
  -8  11  11   59.98    4.07
  -8  11  11   57.09    4.61
  -8  11  11   65.56    9.14
   8 -11 -11   62.15    4.38
   8 -11 -11   67.49    4.31
   8 -11 -11   76.81    7.95
   8 -11 -11   52.96   30.95
  -8  11  12  121.94    7.36
  -8  11  12  134.41    8.50
   8 -11 -12  141.46    8.22
   8 -11 -12  147.45    8.09
   8 -11 -12  150.98   13.08
   8 -11 -12  216.89   37.41
  -8  11  13  185.98   10.72
  -8  11  13  193.93   11.73
  -8  11  13  220.83   18.85
  -8  11  13  237.65   19.35
   8 -11 -13  219.31   11.95
   8 -11 -13  216.66   11.58
   8 -11 -13  224.83   17.87
   8 -11 -13  287.83   40.02
  -8  11  14  148.91    9.05
  -8  11  14  171.02   10.53
  -8  11  14  201.81   16.83
   8 -11 -14  185.18   10.39
   8 -11 -14  193.71   10.27
   8 -11 -14  197.00   15.87
   8 -11 -14  255.64   38.46
  -8  11  15   87.21    5.67
  -8  11  15   89.59    6.64
  -8  11  15   96.84   10.50
   8 -11 -15  111.97    6.74
   8 -11 -15   99.14    6.23
   8 -11 -15  115.17   10.38
   8 -11 -15  119.16   25.74
  -8  11  16   36.13    2.97
  -8  11  16   36.66    3.72
   8 -11 -16   42.45    3.45
  -8  11  17    0.63    0.99
  -8  11  17    4.87    1.71
  -8  11  17    4.09    1.87
   8 -11 -17    1.96    1.37
   8 -11 -17    2.94    1.71
  -8  11  18    1.36    1.52
   8 -11 -18    2.95    1.42
   8 -12  -1   -0.92    2.90
   8 -12  -1   -2.14   10.68
  -8  12   2   24.84    4.35
  -8  12   2    0.12   23.73
   8 -12  -2   19.96    5.29
   8 -12  -2   31.62   18.38
  -8  12   3   93.61   10.12
  -8  12   3   77.35   27.00
   8 -12  -3  109.52   11.32
   8 -12  -3  117.34   32.44
  -8  12   4   66.73    7.83
   8 -12  -4   58.20    8.52
   8 -12  -4  103.68   35.97
  -8  12   5   70.43    7.91
   8 -12  -5   51.99    8.12
   8 -12  -5   50.42   39.81
  -8  12   6  177.38    9.05
  -8  12   6  175.65    9.00
  -8  12   6  152.69   14.84
  -8  12   6  167.14   21.65
   8 -12  -6  166.05    8.89
   8 -12  -6  189.49   16.06
   8 -12  -6  168.59   50.55
  -8  12   7  172.01    9.04
  -8  12   7  167.80   15.31
  -8  12   7  165.81   20.31
   8 -12  -7  163.31    8.82
   8 -12  -7  188.75   15.91
   8 -12  -7  156.36   51.11
  -8  12   8   69.92    5.45
  -8  12   8   82.52    9.39
  -8  12   8   71.46   12.69
   8 -12  -8   83.40    5.12
   8 -12  -8   88.18    9.35
   8 -12  -8   98.86   48.37
  -8  12   9   72.40    4.50
  -8  12   9   66.41    5.38
  -8  12   9   81.38   12.08
   8 -12  -9   77.77    5.00
   8 -12  -9   77.95    4.74
   8 -12  -9   88.95    9.12
  -8  12  10   58.38    3.90
  -8  12  10   55.72    4.71
   8 -12 -10   59.94    4.26
   8 -12 -10   61.67    4.04
   8 -12 -10   70.24    7.76
   8 -12 -10  103.26   42.42
  -8  12  11  118.65    7.10
  -8  12  11  110.42    7.71
  -8  12  11  140.11   13.35
  -8  12  11  147.95   15.03
   8 -12 -11  136.15    7.95
   8 -12 -11  133.75    7.53
   8 -12 -11  151.64   12.97
   8 -12 -11  133.17   42.01
  -8  12  12   39.10    3.07
  -8  12  12   34.56    3.75
  -8  12  12   46.72    6.79
  -8  12  12   48.87    7.89
   8 -12 -12   43.19    3.48
   8 -12 -12   39.13    3.19
   8 -12 -12   51.47    6.23
   8 -12 -12   39.94   32.78
  -8  12  13    7.90    1.41
  -8  12  13    4.59    1.82
  -8  12  13   10.14    3.90
   8 -12 -13    6.84    1.60
   8 -12 -13    6.74    1.55
  -8  12  14   25.52    2.47
  -8  12  14   29.50    3.45
  -8  12  14   32.74    5.94
   8 -12 -14   31.85    2.99
   8 -12 -14   32.50    2.91
   8 -12 -14   27.99    4.78
   8 -12 -14   57.00   24.63
  -8  12  15   83.21    5.46
  -8  12  15   91.31    6.66
  -8  12  15  115.29   11.13
   8 -12 -15   95.14    6.22
   8 -12 -15   97.23    9.76
   8 -12 -15   41.30   29.18
  -8  12  16   29.20    2.66
  -8  12  16   31.85    3.73
  -8  12  16   33.74    5.59
   8 -12 -16   36.90    3.30
   8 -12 -16   43.69    5.48
   8 -12 -16   53.77   17.87
  -8  12  17   21.67    2.52
  -8  12  17   16.63    2.64
  -8  12  17   24.54    4.58
   8 -12 -17   24.51    2.72
   8 -12 -17   34.05    4.61
  -8  13   1   93.31    9.62
  -8  13   1   62.20   31.90
   8 -13  -1   87.03   11.05
   8 -13  -1   86.00   20.88
  -8  13   2   33.86    5.23
  -8  13   2    4.92   25.28
   8 -13  -2   36.59    6.68
   8 -13  -2   33.31   19.13
  -8  13   3   80.90    8.86
  -8  13   3   59.60   27.29
   8 -13  -3   75.37    9.74
   8 -13  -3   79.95   23.46
  -8  13   4   76.67    9.03
  -8  13   4   91.39   22.84
   8 -13  -4   91.29   10.13
   8 -13  -4   62.03   36.41
  -8  13   5    8.13    3.00
  -8  13   5   19.78   14.87
   8 -13  -5   14.35    4.02
   8 -13  -5   43.00   35.07
  -8  13   6    7.84    0.76
  -8  13   6   11.60    3.08
  -8  13   6   22.94   12.86
   8 -13  -6   11.22    3.64
   8 -13  -6   -2.24   41.86
  -8  13   7   26.12    1.91
  -8  13   7   31.09    2.15
  -8  13   7   32.52    5.11
  -8  13   7   36.85   12.42
   8 -13  -7   21.15    2.11
   8 -13  -7   24.45    2.02
   8 -13  -7   30.28    5.28
   8 -13  -7   19.05   46.88
  -8  13   8    4.04    0.75
  -8  13   8    4.21    1.05
  -8  13   8    4.01    2.26
  -8  13   8    8.85    8.15
   8 -13  -8    0.10    1.19
   8 -13  -8    2.56    1.19
   8 -13  -8    4.14    2.47
   8 -13  -8    4.45   45.09
  -8  13   9   39.60    2.95
  -8  13   9   46.60    4.62
  -8  13   9   47.21    6.77
  -8  13   9   40.55    9.78
   8 -13  -9   42.75    3.42
   8 -13  -9   46.37    3.28
   8 -13  -9   49.75    6.68
   8 -13  -9   20.54   46.73
  -8  13  10   86.63    5.33
  -8  13  10   77.78    6.27
  -8  13  10   90.30   10.05
  -8  13  10  100.21   13.14
   8 -13 -10   91.85    5.87
   8 -13 -10   91.85    5.49
   8 -13 -10   93.39    9.91
   8 -13 -10  143.89   49.17
  -8  13  11   35.18    2.84
  -8  13  11   40.56    4.23
  -8  13  11   40.80    6.47
   8 -13 -11   42.91    3.43
   8 -13 -11   42.92    3.26
   8 -13 -11   29.56   43.56
  -8  13  12  103.72    6.54
  -8  13  12  111.61    7.89
  -8  13  12  140.66   14.64
   8 -13 -12  123.15    7.41
   8 -13 -12  131.18    7.33
   8 -13 -12  129.62   11.94
   8 -13 -12  138.73   47.61
  -8  13  13  125.75   13.99
   8 -13 -13  128.78    8.04
   8 -13 -13  135.78    7.86
   8 -13 -13  144.98   12.86
   8 -13 -13  166.26   38.35
  -8  13  14   78.21    5.24
  -8  13  14   76.79    6.29
  -8  13  14   92.69   10.79
   8 -13 -14   89.50    6.05
   8 -13 -14   88.83    5.51
   8 -13 -14  105.40    9.75
   8 -13 -14  132.41   37.38
  -8  13  15   85.79    5.55
  -8  13  15   87.57    6.59
  -8  13  15   93.96   10.54
   8 -13 -15  105.78    6.66
  -8  13  16   36.17    2.99
  -8  13  16   28.63    3.57
  -8  13  16   34.83    5.90
   8 -13 -16   37.99    3.50
   8 -13 -16   49.49    5.79
  -8  14   1  -11.89   31.08
   8 -14  -1   10.84    4.65
   8 -14  -1   28.13   14.49
  -8  14   2    4.75    2.02
  -8  14   2   33.42   29.33
   8 -14  -2    3.14    3.98
   8 -14  -2   -0.40   14.97
  -8  14   3    8.39    2.62
   8 -14  -3   -4.58   20.60
  -8  14   4   -0.87    0.85
  -8  14   4  -11.67   22.89
   8 -14  -4    2.78    3.49
   8 -14  -4    5.59   27.87
  -8  14   5    6.88    2.55
  -8  14   5    3.49   18.51
   8 -14  -5   11.48    4.12
  -8  14   6   78.16    8.93
  -8  14   6   75.24   19.28
  -8  14   7   76.91    4.36
  -8  14   7   80.85    4.51
  -8  14   7   82.01    9.13
  -8  14   7   93.12   18.95
   8 -14  -7   76.46    4.59
  -8  14   8   62.93    3.77
  -8  14   8   64.83    3.94
  -8  14   8   65.06    7.85
   8 -14  -8   54.54    4.12
   8 -14  -8   55.60    3.75
   8 -14  -8   85.71   54.07
  -8  14   9  136.25    7.54
  -8  14   9  138.95    7.71
  -8  14   9  137.15   13.33
  -8  14   9  149.56   19.53
   8 -14  -9  128.90    8.02
   8 -14  -9  135.20    7.62
   8 -14  -9  157.04   13.80
   8 -14  -9  186.36   61.19
  -8  14  10  129.95    7.66
  -8  14  10  156.21   18.15
   8 -14 -10  142.60    8.03
   8 -14 -10  154.02   13.76
   8 -14 -10  160.68   57.24
  -8  14  11   26.58    2.43
  -8  14  11   20.90    3.67
  -8  14  11   31.87    8.31
   8 -14 -11   31.61    3.07
   8 -14 -11   28.39    4.95
  -8  14  12   36.28    2.98
  -8  14  12   25.03    4.03
  -8  14  12   28.41    7.53
   8 -14 -12   46.87    3.85
   8 -14 -12   38.25    3.15
   8 -14 -12   49.24    6.09
   8 -14 -12   54.44   31.62
  -8  14  13   30.67    2.74
  -8  14  13   18.55    3.62
  -8  14  13   33.84    6.85
   8 -14 -13   32.68    3.27
   8 -14 -13   30.27    2.82
   8 -14 -13   37.54    5.27
   8 -14 -13    9.50   28.85
  -8  14  14   16.16    1.94
  -8  14  14    7.33    2.44
  -8  14  14   22.15    5.22
   8 -14 -14   16.86    2.43
   8 -14 -14   16.05    2.20
   8 -14 -14   24.70    3.96
   8 -14 -14   22.60   17.07
  -8  14  15    0.51    1.08
  -8  14  15    3.30    1.96
  -8  14  15    4.01    2.89
   8 -14 -15    1.26    1.57
   8 -14 -15    4.92    1.77
  -8  14  16    0.94    1.16
  -8  14  16    2.14    1.81
  -8  15   1   -2.38   20.15
   8 -15  -1   26.02    6.45
   8 -15  -1   21.03    9.34
  -8  15   2  -24.23   27.30
   8 -15  -2   21.37    5.73
   8 -15  -2   16.14   10.45
  -8  15   3   -1.63   25.03
   8 -15  -3   13.59    4.97
   8 -15  -3    8.00   12.46
  -8  15   4   29.90   23.59
   8 -15  -4   28.38    6.10
   8 -15  -4   40.97   21.46
  -8  15   5   83.27   22.53
   8 -15  -5   85.76   10.31
  -8  15   6  136.59   23.36
   8 -15  -6  116.85   12.47
  -8  15   7   83.44   20.73
   8 -15  -7   92.33   10.47
   8 -15  -7   93.02   58.85
  -8  15   8   15.55   11.86
   8 -15  -8   20.53    4.72
   8 -15  -8  -12.58   48.66
  -8  15   9   -1.49    7.44
   8 -15  -9    1.61    2.37
   8 -15  -9   -1.86   39.37
  -8  15  10   -2.25    5.59
   8 -15 -10    3.11    2.60
   8 -15 -10   -4.51   37.46
  -8  15  11   -0.99    5.08
   8 -15 -11    1.63    2.18
   8 -15 -11   -4.66   29.32
   8 -15 -12   14.94    3.93
   8 -15 -12   29.09   21.52
  -8  15  13   13.32    5.33
   8 -15 -13   23.68    4.32
  -8  15  14   16.67    5.37
   8 -15 -14   23.43    4.31
  -8  16   1    4.77    7.31
   8 -16  -1   23.95    6.00
  -8  16   2   -3.91   14.50
   8 -16  -2   20.80    5.60
  -8  16   3    0.88   15.94
   8 -16  -3    4.77    4.05
   8 -16  -3    5.31    5.71
   8 -16  -4   13.91    4.85
   8 -16  -4    1.26    7.68
   8 -16  -5   -3.49   10.90
  -8  16   6   -1.77   10.15
   8 -16  -6  -16.91   16.83
  -8  16   7   29.72   12.18
   8 -16  -7    2.57   20.89
   8 -16  -8   27.58   24.24
  -8  16   9   21.92    8.84
  -8  16  10   23.01    7.87
  -8  16  11   15.75    7.16
   8 -16 -11   26.73    4.99
  -8  16  12   37.40    8.49
   8 -16 -12   55.71    7.07
  -8  16  13   53.36    8.98
   8 -16 -13  145.15   11.13
  -8  17   4   11.49    6.52
   8 -17  -4   27.04    6.19
  -8  17   5   10.49    6.12
   8 -17  -5   36.76    6.36
  -8  17   6    8.89    6.12
   8 -17  -6   49.20    6.71
  -8  17   7   14.17    6.91
   8 -17  -7   76.83    8.21
  -8  17   8    6.69    5.47
   8 -17  -8   34.85    5.68
  -8  17   9    6.57    4.81
   8 -17  -9   23.27    4.78
  -8  17  10    9.67    5.49
   8 -17 -10   32.22    5.46
  -7 -18   1   42.48    3.25
  -7 -18   1   33.88    6.96
   7  18  -1   44.73    3.18
   7  18  -1   64.86   37.82
  -7 -18   2   36.01    7.11
   7  18  -2    5.23   22.60
  -7 -17   1   23.55    2.38
  -7 -17   1   31.01    5.94
   7  17  -1   28.76    2.39
   7  17  -1   26.39    3.02
   7  17  -1   32.38    4.69
   7  17  -1   38.09   38.24
  -7 -17   2    2.38    1.17
  -7 -17   2    1.11    2.69
   7  17  -2    3.19    0.99
   7  17  -2   16.08   34.09
   7  17  -2   -0.22    1.60
  -7 -17   3    2.78    1.31
  -7 -17   3    2.30    3.38
   7  17  -3    4.96    1.18
   7  17  -3  -20.36   34.49
  -7 -16   1   64.24    4.32
  -7 -16   1   67.63    8.81
   7  16  -1   69.64    4.30
   7  16  -1   63.50    4.87
   7  16  -1   63.78    7.58
   7  16  -1   46.77   41.46
  -7 -16   2   36.84    6.82
   7  16  -2   50.51    4.10
   7  16  -2   36.77   38.84
  -7 -16   3   23.40    2.31
  -7 -16   3   20.81    5.49
   7  16  -3   30.88    2.41
   7  16  -3   26.63   49.76
   7  16  -3   23.74    4.51
  -7 -16   4   24.95    2.40
  -7 -16   4   21.35    5.63
   7  16  -4   29.63    2.45
   7  16  -4   40.09   26.89
  -7 -16   5   53.92    8.12
   7  16  -5   47.15   19.21
  -7 -15   1   83.64    5.39
   7  15  -1   94.74    5.50
   7  15  -1   87.21    5.95
   7  15  -1  103.01    9.72
   7  15  -1   97.27   39.16
  -7 -15   2   12.36    1.64
  -7 -15   2   15.40    4.75
   7  15  -2   12.97    1.54
   7  15  -2   12.67    2.05
   7  15  -2   44.54   45.97
  -7 -15   3   73.63    4.81
  -7 -15   3   78.76    9.50
   7  15  -3   81.12    4.90
   7  15  -3   79.45    5.58
   7  15  -3   86.94   47.37
  -7 -15   4   74.91    4.72
  -7 -15   4   72.89    9.14
   7  15  -4   70.86    4.50
   7  15  -4   71.29    5.33
   7  15  -4   63.06   43.00
   7  15  -4   69.58    8.18
  -7 -15   5   13.83    1.80
  -7 -15   5   12.10    4.15
   7  15  -5   10.32    1.49
   7  15  -5  -74.17   39.21
   7  15  -5   11.82    3.03
  -7 -15   6    0.78    2.86
   7  15  -6  -31.75   24.01
  -7 -14   1    0.44    0.48
  -7 -14   1   -0.99    0.79
  -7 -14   1    0.96    2.04
   7  14  -1    0.93    0.69
   7  14  -1   -0.62    0.85
   7  14  -1    9.99   34.36
  -7 -14   2    3.36    1.08
  -7 -14   2    3.15    2.87
  -7 -14   2    2.59    3.18
   7  14  -2    2.82    0.92
   7  14  -2    3.10    1.12
   7  14  -2  -15.21   35.23
  -7 -14   3    8.17    1.48
  -7 -14   3    5.96    3.29
  -7 -14   3    5.65    3.31
   7  14  -3    7.07    1.17
   7  14  -3  -33.16   34.68
   7  14  -3    7.00    2.48
  -7 -14   4   22.56    2.19
  -7 -14   4   17.23    4.75
   7  14  -4   26.20    2.17
   7  14  -4   16.70    2.43
   7  14  -4   47.57   50.51
   7  14  -4   24.10    4.18
  -7 -14   5   66.63    9.39
   7  14  -5   82.76    5.14
   7  14  -5   80.13    5.77
   7  14  -5  105.48   45.10
   7  14  -5   75.89    8.55
  -7 -14   6  124.58    7.24
   7  14  -6  137.66    7.56
   7  14  -6  119.04   11.80
  -7 -14   7   48.96    3.91
  -7 -14   7   59.42    7.94
   7  14  -7   14.96   30.84
  -7 -13   1  126.60    7.03
  -7 -13   1  104.81    6.43
  -7 -13   1  114.20   11.93
  -7 -13   1  130.45   13.06
   7  13  -1  125.98    6.90
   7  13  -1  115.89    7.10
   7  13  -1  124.83   11.44
   7  13  -1  119.03   38.74
  -7 -13   2  103.82    6.32
  -7 -13   2  118.12    6.76
  -7 -13   2  109.29   11.71
  -7 -13   2  120.39   12.42
   7  13  -2  130.66    7.01
   7  13  -2  125.62    7.44
   7  13  -2  122.66   38.16
  -7 -13   3  153.72    8.54
  -7 -13   3  160.85   14.74
  -7 -13   3  171.16   14.93
   7  13  -3  139.46    8.63
   7  13  -3  211.95   49.67
   7  13  -3  151.42   13.77
  -7 -13   4  157.00    8.64
  -7 -13   4  166.92   15.02
  -7 -13   4  151.60   14.19
   7  13  -4  153.69    8.41
   7  13  -4  146.27    8.96
   7  13  -4  173.82   54.23
   7  13  -4  152.74   13.79
  -7 -13   5  117.66   12.33
  -7 -13   5  120.90   11.82
   7  13  -5  121.00    6.83
   7  13  -5  129.48    7.85
   7  13  -5   95.42   48.35
   7  13  -5  110.15   11.22
  -7 -13   6   29.30    5.87
   7  13  -6   32.08    3.29
   7  13  -6    9.02   47.68
   7  13  -6   34.53    5.13
  -7 -13   7    3.31    1.30
  -7 -13   7    5.83    2.85
   7  13  -7    5.02    1.18
   7  13  -7   -3.18   40.54
   7  13  -7    3.04    1.80
  -7 -13   8   -1.06    1.09
  -7 -13   8   -0.89    2.00
   7  13  -8   -0.04    0.86
   7  13  -8  -13.78   30.33
  -7 -12   1  125.75    7.32
  -7 -12   1  134.07    7.56
  -7 -12   1  146.11   13.35
  -7 -12   1  141.17   13.96
   7  12  -1  134.82    7.47
   7  12  -1  132.87    7.85
   7  12  -1  147.03   12.69
   7  12  -1  133.85   30.77
  -7 -12   2   11.94    1.39
  -7 -12   2   13.62    1.57
  -7 -12   2   16.82    3.87
  -7 -12   2    9.13    3.80
   7  12  -2   14.46    1.48
   7  12  -2   12.10    1.74
   7  12  -2   23.11   27.90
  -7 -12   3    1.86    0.64
  -7 -12   3    1.27    0.88
  -7 -12   3    2.60    2.53
  -7 -12   3    2.84    2.50
   7  12  -3    1.67    0.77
   7  12  -3    1.19    1.01
   7  12  -3   -6.05   27.92
   7  12  -3    2.00    1.49
  -7 -12   4    1.58    0.60
  -7 -12   4    1.80    1.00
  -7 -12   4    0.88    2.46
   7  12  -4    1.68    0.88
   7  12  -4    3.17    1.18
   7  12  -4   20.51   35.02
  -7 -12   5   -1.45    0.90
  -7 -12   5    2.66    2.26
  -7 -12   5    0.82    1.59
   7  12  -5    1.66    0.89
   7  12  -5    0.76    1.05
   7  12  -5   62.66   42.13
   7  12  -5    0.11    1.07
  -7 -12   6   37.41    2.94
  -7 -12   6   39.51    5.78
   7  12  -6   44.38    3.07
   7  12  -6   37.14    3.41
   7  12  -6   39.05    5.63
  -7 -12   7   35.60    3.00
  -7 -12   7   39.95    6.30
   7  12  -7   38.65    2.95
   7  12  -7   38.23    3.50
   7  12  -7   19.38   44.91
  -7 -12   8   31.67    2.68
  -7 -12   8   26.75    5.48
   7  12  -8   35.91    2.72
   7  12  -8   10.57   37.88
   7  12  -8   28.50    4.84
  -7 -12   9   67.39    4.55
  -7 -12   9   62.72    8.53
   7  12  -9   78.02    4.77
   7  12  -9   66.97   35.53
  -7 -11   1  128.11   12.04
  -7 -11   1  119.96   12.47
   7  11  -1  113.05   11.09
   7  11  -1  101.75   24.32
  -7 -11   2  201.93   17.68
  -7 -11   2  204.91   17.98
   7  11  -2  204.44   10.93
   7  11  -2  238.39   12.50
   7  11  -2  194.63   34.10
  -7 -11   3  145.08    8.17
  -7 -11   3  173.21   14.79
  -7 -11   3  151.05   14.05
   7  11  -3  150.49    8.18
   7  11  -3  113.42   33.47
   7  11  -3  153.07   13.65
  -7 -11   4  139.25    7.70
  -7 -11   4  142.92    7.74
  -7 -11   4  132.70   12.61
   7  11  -4  129.76    7.29
   7  11  -4  132.62    7.96
   7  11  -4  130.93   12.32
  -7 -11   5   68.86    4.25
  -7 -11   5   61.39    4.04
  -7 -11   5   65.98    8.06
  -7 -11   5   63.60    7.65
   7  11  -5   66.66    4.15
   7  11  -5   58.74    4.41
   7  11  -5   66.17   31.71
   7  11  -5   63.73    7.49
  -7 -11   6  148.17    8.37
  -7 -11   6  160.70   14.57
  -7 -11   6  153.82   13.83
   7  11  -6  157.34    8.58
   7  11  -6  161.18    9.33
   7  11  -6  172.18   42.21
   7  11  -6  155.22   13.85
  -7 -11   7  232.63   12.41
  -7 -11   7  240.09   20.06
  -7 -11   7  242.40   19.36
   7  11  -7  259.01   13.19
   7  11  -7  233.65   13.18
   7  11  -7  204.30   47.15
   7  11  -7  232.30   19.15
  -7 -11   8   50.08    3.77
  -7 -11   8   65.71    7.91
   7  11  -8   59.44    3.96
   7  11  -8   60.95    4.68
   7  11  -8   84.46   37.81
  -7 -11   9   37.22    3.03
  -7 -11   9   37.49    6.19
   7  11  -9   41.03    2.98
   7  11  -9   90.31   35.26
   7  11  -9   35.77    5.49
  -7 -11  10   15.87    2.32
  -7 -11  10   26.38    4.78
   7  11 -10   26.95   25.08
  -7 -10   1  229.35   12.07
  -7 -10   1  233.60   19.62
   7  10  -1  224.02   11.83
   7  10  -1  232.34   18.52
  -7 -10   2  138.30    7.77
  -7 -10   2  149.78   13.61
  -7 -10   2  145.86   13.63
   7  10  -2  152.65    8.11
   7  10  -2  110.33   25.86
   7  10  -2  138.32   12.90
  -7 -10   3   67.20    4.31
  -7 -10   3   77.47    8.63
   7  10  -3   74.85    4.47
   7  10  -3   88.29   25.45
  -7 -10   4   55.74    3.79
  -7 -10   4   50.49    3.42
  -7 -10   4   56.04    7.11
  -7 -10   4   54.22    6.84
   7  10  -4   50.49    3.37
   7  10  -4   49.66    3.97
   7  10  -4   59.52   25.52
   7  10  -4   53.77    6.63
  -7 -10   5    6.20    1.04
  -7 -10   5    8.98    1.34
  -7 -10   5   10.28    2.93
  -7 -10   5    9.88    2.63
   7  10  -5    7.60    1.17
   7  10  -5    6.03    1.51
   7  10  -5   -5.75   18.78
   7  10  -5    7.08    2.35
  -7 -10   6   26.53    2.13
  -7 -10   6   24.97    2.21
  -7 -10   6   28.44    4.93
  -7 -10   6   22.78    4.33
   7  10  -6   23.58    2.11
   7  10  -6   30.92    2.81
   7  10  -6   44.98   26.51
   7  10  -6   22.50    4.25
  -7 -10   7    2.07    1.08
  -7 -10   7    3.30    2.22
  -7 -10   7    2.33    1.78
   7  10  -7    4.42    1.04
   7  10  -7    2.72    1.24
   7  10  -7   25.36   24.63
   7  10  -7    3.48    1.68
  -7 -10   8   13.00    1.72
  -7 -10   8    9.51    3.50
  -7 -10   8   13.79    3.05
   7  10  -8   11.15    1.52
   7  10  -8   12.22    2.07
   7  10  -8  -10.35   24.07
   7  10  -8   14.42    3.10
  -7 -10   9  144.87   13.69
   7  10  -9  139.48    8.66
   7  10  -9  188.69   36.78
  -7 -10  10   78.87    5.07
  -7 -10  10   80.04    9.37
   7  10 -10   97.40    5.49
   7  10 -10   68.86   29.77
   7  10 -10   75.57    8.82
  -7 -10  11    9.13    3.24
   7  10 -11   30.41   21.79
  -7  -9   1    0.97    0.69
   7   9  -1    0.92    0.53
  -7  -9   2    1.77    0.77
   7   9  -2    2.14    0.70
  -7  -9   3   10.21    1.31
  -7  -9   3    8.53    3.04
  -7  -9   3    9.37    2.98
   7   9  -3   11.04    1.29
   7   9  -3   18.02   15.74
   7   9  -3   11.89    2.74
  -7  -9   4    8.73    3.26
   7   9  -4   14.38    1.63
   7   9  -4   12.12   15.41
  -7  -9   5   53.62    3.56
  -7  -9   5   53.98    7.10
  -7  -9   5   54.42    6.84
   7   9  -5   56.46    3.61
   7   9  -5   38.34   18.38
   7   9  -5   58.93    6.85
  -7  -9   6  154.65    8.56
  -7  -9   6  143.85    8.13
  -7  -9   6  153.65   14.09
  -7  -9   6  155.06   13.68
   7   9  -6  150.96    8.31
   7   9  -6  149.86    8.89
   7   9  -6  184.38   27.57
   7   9  -6  168.42   13.99
  -7  -9   7  372.52   18.58
  -7  -9   7  358.43   18.07
  -7  -9   7  334.84   26.29
  -7  -9   7  328.34   25.53
   7   9  -7  349.25   17.82
   7   9  -7  310.49   17.28
   7   9  -7  450.41   45.77
   7   9  -7  358.73   26.40
  -7  -9   8  253.25   13.56
  -7  -9   8  278.82   21.89
  -7  -9   8  281.25   21.29
   7   9  -8  265.48   13.88
   7   9  -8  252.50   14.13
   7   9  -8  343.53   41.86
   7   9  -8  261.93   20.94
  -7  -9   9  131.85    7.59
  -7  -9   9  138.78   13.45
  -7  -9   9  129.38   12.32
   7   9  -9  142.48    7.85
   7   9  -9  136.69    8.32
   7   9  -9  148.81   12.98
  -7  -9  10   60.46    7.37
   7   9 -10   47.56    4.13
   7   9 -10   44.54   22.56
  -7  -9  11   17.65    2.17
  -7  -9  11   16.43    4.17
   7   9 -11   16.90    1.84
   7   9 -11   -0.69   24.80
   7   9 -11   19.28    3.81
  -7  -9  12    4.74    2.58
   7   9 -12    6.14   16.13
  -7  -8   1  381.63   19.77
  -7  -8   1  368.26   19.31
   7   8  -1  404.66   20.27
   7   8  -1  455.06   22.06
  -7  -8   2  281.67   14.69
  -7  -8   2  289.69   14.78
   7   8  -2  299.26   14.99
   7   8  -2  266.10   14.45
  -7  -8   3  245.91   13.11
  -7  -8   3  267.90   13.57
   7   8  -3  251.52   13.05
  -7  -8   4  321.75   16.15
  -7  -8   4  320.05   24.27
  -7  -8   4  299.73   23.38
   7   8  -4  323.83   16.21
   7   8  -4  286.76   31.60
   7   8  -4  281.83   22.85
  -7  -8   5  325.12   24.42
  -7  -8   5  295.21   23.27
   7   8  -5  329.96   33.34
   7   8  -5  301.38   23.39
  -7  -8   6  215.58   11.38
  -7  -8   6  238.97   18.65
  -7  -8   6  208.98   17.46
   7   8  -6  225.48   11.67
   7   8  -6  235.51   29.72
   7   8  -6  195.69   17.17
  -7  -8   7   93.93    5.59
  -7  -8   7  110.02   10.52
  -7  -8   7   96.47    9.71
   7   8  -7   98.34    5.67
   7   8  -7  117.71   21.79
   7   8  -7   89.10    9.63
  -7  -8   8    7.50    1.16
  -7  -8   8   12.12    1.57
  -7  -8   8    8.13    2.93
  -7  -8   8   10.20    2.58
   7   8  -8    8.92    1.33
   7   8  -8    8.43    1.70
   7   8  -8    7.95   15.94
   7   8  -8    9.81    2.64
  -7  -8   9   24.78    2.33
  -7  -8   9   33.38    5.17
  -7  -8   9   27.33    4.56
   7   8  -9   29.90    2.40
   7   8  -9   57.50   20.39
   7   8  -9   31.86    4.81
  -7  -8  10    1.66    1.19
  -7  -8  10    0.73    1.02
   7   8 -10    0.71    0.84
   7   8 -10    0.33    1.15
   7   8 -10    0.73    1.24
  -7  -8  11    4.43    1.45
  -7  -8  11    5.08    2.53
   7   8 -11    6.27    1.20
   7   8 -11    5.69    1.62
   7   8 -11   21.98   18.14
   7   8 -11    4.55    2.23
  -7  -8  12   11.96    1.92
   7   8 -12   17.47    1.84
   7   8 -12   19.05    3.81
  -7  -8  13   64.92    7.92
   7   8 -13   29.57   15.36
  -7  -7   1  370.50   18.45
  -7  -7   1  315.91   16.89
   7   7  -1  401.47   19.27
   7   7  -1  341.33   17.80
  -7  -7   2   83.88    4.88
  -7  -7   2   79.76    4.72
  -7  -7   3    2.78    0.83
   7   7  -3    2.56    0.74
  -7  -7   4    2.05    0.60
  -7  -7   4    1.63    0.75
   7   7  -4    1.79    0.74
   7   7  -4    2.07    0.91
  -7  -7   5    4.05    0.86
  -7  -7   5    5.88    1.05
  -7  -7   5    4.82    1.96
   7   7  -5    6.30    1.03
   7   7  -5    5.42    1.21
   7   7  -5    5.33    1.89
   7   7  -6   82.30   15.21
   7   7  -6   84.21    8.87
  -7  -7   7  310.92   15.62
  -7  -7   7  273.47   22.38
  -7  -7   7  264.17   21.83
   7   7  -7  310.65   15.64
   7   7  -7  279.19   28.94
   7   7  -7  321.20   23.37
  -7  -7   8  115.50    6.56
  -7  -7   8  122.70   11.54
  -7  -7   8  119.10   11.02
   7   7  -8  122.53    6.79
   7   7  -8  118.55   18.39
   7   7  -8   98.38   10.71
  -7  -7   9  145.01   13.08
  -7  -7   9  133.04   12.34
   7   7  -9  152.80   21.92
   7   7  -9  131.59   12.53
  -7  -7  10  207.27   11.11
  -7  -7  10  202.70   17.40
  -7  -7  10  208.02   17.04
   7   7 -10  213.38   11.18
   7   7 -10  232.00   29.73
   7   7 -10  195.24   17.06
  -7  -7  11   63.36    4.28
  -7  -7  11   68.90    8.00
  -7  -7  11   61.95    7.39
   7   7 -11   65.24    4.16
   7   7 -11   80.65   19.38
   7   7 -11   62.15    7.72
  -7  -7  12   74.01    4.79
  -7  -7  12   73.04    8.50
   7   7 -12   75.02    4.64
   7   7 -12   66.84    5.26
   7   7 -12   54.07   19.39
   7   7 -12   72.60    8.50
  -7  -7  13   98.82    5.96
  -7  -7  13   90.69    9.83
   7   7 -13   93.81    5.62
   7   7 -13   89.89   21.19
   7   7 -13   80.84    9.77
  -7  -7  14   42.25    5.71
   7   7 -14    9.80    7.21
  -7  -6   1  119.65    6.46
  -7  -6   1  106.29    6.02
   7   6  -1  103.77    5.92
   7   6  -1  120.04    6.61
  -7  -6   2   79.94    4.71
   7   6  -2   82.37    4.96
  -7  -6   3  465.81   23.74
  -7  -6   3  472.37   23.83
   7   6  -3  494.98   24.45
   7   6  -3  489.03   24.57
  -7  -6   4  426.94   21.63
   7   6  -4  442.02   22.05
  -7  -6   5  160.40    8.64
  -7  -6   5  154.91    8.37
  -7  -6   6  286.35   14.84
  -7  -6   6  295.38   15.00
  -7  -6   6  292.31   22.57
  -7  -6   6  269.46   21.71
   7   6  -6  291.83   14.95
   7   6  -6  289.37   15.18
   7   6  -6  296.02   26.58
   7   6  -6  284.82   22.14
  -7  -6   7  374.64   19.33
  -7  -6   7  366.98   19.07
  -7  -6   7  407.37   29.31
   7   6  -7  393.58   19.85
   7   6  -7  402.68   20.45
   7   6  -7  361.57   32.37
  -7  -6   8  241.59   12.67
  -7  -6   8  260.42   20.13
  -7  -6   8  212.90   18.63
   7   6  -8  268.09   13.45
   7   6  -8  247.07   25.08
   7   6  -8  244.62   19.55
  -7  -6   9   30.63    2.55
  -7  -6   9   39.15    5.10
   7   6  -9   30.13    2.48
   7   6  -9   34.48    5.21
  -7  -6  10    1.12    1.09
  -7  -6  10   -0.67    1.33
   7   6 -10    0.69    0.79
   7   6 -10    0.86    8.59
  -7  -6  11    1.75    1.24
  -7  -6  11    0.42    1.59
  -7  -6  11    2.02    1.23
   7   6 -11    1.35    0.90
   7   6 -11    1.40    9.99
   7   6 -11    0.64    1.67
  -7  -6  12   -0.66    1.21
  -7  -6  12    0.44    1.28
   7   6 -12   -0.22    0.88
   7   6 -12   -3.68   11.20
   7   6 -12   -0.14    1.62
  -7  -6  13    6.38    1.60
  -7  -6  13    6.33    2.65
   7   6 -13    7.82    1.40
   7   6 -13    1.69   13.49
   7   6 -13   10.35    3.19
  -7  -6  14   18.91    3.97
   7   6 -14   12.08   10.00
   7   5  -1  667.41   33.10
   7   5  -1  674.80   33.53
  -7  -5   2  215.47   11.29
  -7  -5   2  221.75   11.38
   7   5  -2  210.39   11.05
   7   5  -2  220.05   11.54
  -7  -5   3   85.00    5.00
   7   5  -3   91.96    5.35
  -7  -5   4   86.04    5.06
  -7  -5   4   95.11    5.25
   7   5  -4   88.21    5.07
   7   5  -4   85.66    5.23
  -7  -5   5  159.57    8.69
   7   5  -5  174.58    9.16
  -7  -5   6   19.41    1.73
  -7  -5   6   21.19    1.87
   7   5  -6   20.57    1.83
   7   5  -6   23.03    2.11
  -7  -5   7   11.87    1.30
  -7  -5   7   12.09    1.46
  -7  -5   7   16.71    3.11
  -7  -5   7   13.31    2.88
   7   5  -7   11.99    1.41
   7   5  -7   11.45    1.56
   7   5  -7    6.72    5.50
   7   5  -7   10.09    2.90
  -7  -5   8    3.79    0.82
  -7  -5   8    4.55    1.11
  -7  -5   8    5.10    1.90
  -7  -5   8    4.03    1.75
   7   5  -8    4.07    1.00
   7   5  -8    3.68    1.18
   7   5  -8    3.81    5.27
   7   5  -8    2.60    1.81
  -7  -5   9   93.12    5.67
  -7  -5   9  103.72    6.01
  -7  -5   9  111.80   10.61
  -7  -5   9  103.35   10.16
   7   5  -9  105.89    6.05
   7   5  -9  104.73    6.31
  -7  -5  10  137.66    7.95
  -7  -5  10  158.93    8.54
  -7  -5  10  150.93   13.60
  -7  -5  10  144.93   13.18
   7   5 -10  169.69    8.83
   7   5 -10  150.55    8.67
   7   5 -10  157.58   18.35
   7   5 -10  136.54   13.36
  -7  -5  11  118.95    6.95
  -7  -5  11  125.09   11.85
  -7  -5  11  126.12   11.60
   7   5 -11  118.73    6.80
   7   5 -11  170.64   18.55
   7   5 -11  116.72   11.94
  -7  -5  12  117.22    6.82
  -7  -5  12  115.48   11.37
  -7  -5  12  118.99   11.17
   7   5 -12  114.02    6.60
   7   5 -12  127.01   18.74
   7   5 -12  113.08   11.73
  -7  -5  13   70.84    4.71
  -7  -5  13   74.57    8.36
   7   5 -13   72.77    4.52
   7   5 -13   97.19   17.38
   7   5 -13   65.14    8.83
  -7  -5  14   61.47    4.41
   7   5 -14   78.80    4.74
   7   5 -14   71.07    8.95
  -7  -5  15   48.62    6.56
   7   5 -15   42.73   10.28
  -7  -4   1   13.47    1.28
  -7  -4   1   15.03    1.32
  -7  -4   2   51.69    3.26
  -7  -4   2   56.19    3.32
   7   4  -2   48.79    3.12
   7   4  -2   53.39    3.43
  -7  -4   3   68.69    4.07
  -7  -4   3   70.72    4.06
   7   4  -3   67.48    3.98
   7   4  -3   61.56    3.99
  -7  -4   4   13.60    1.35
   7   4  -4   17.26    1.64
  -7  -4   5   51.67    3.30
  -7  -4   5   55.33    3.36
   7   4  -5   49.51    3.24
   7   4  -5   48.60    3.39
  -7  -4   6  498.72   26.19
  -7  -4   6  553.92   27.62
   7   4  -6  600.21   29.02
   7   4  -6  585.59   28.82
  -7  -4   7  802.88   39.52
  -7  -4   7  823.10   40.02
  -7  -4   7  776.02   53.67
  -7  -4   7  718.89   51.97
   7   4  -7  816.29   39.89
   7   4  -7  815.90   40.13
  -7  -4   8  509.80   25.65
  -7  -4   8  529.21   26.19
  -7  -4   8  517.25   36.70
  -7  -4   8  486.32   35.71
   7   4  -8  503.62   25.47
   7   4  -8  530.17   26.47
   7   4  -8  494.29   38.07
   7   4  -8  518.31   36.87
  -7  -4   9  218.67   11.43
  -7  -4   9  215.95   11.36
  -7  -4   9  227.14   17.91
  -7  -4   9  241.61   18.11
   7   4  -9  201.02   10.92
   7   4  -9  201.18   11.19
   7   4  -9  198.06   19.39
   7   4  -9  197.77   17.40
  -7  -4  10  120.79    6.79
  -7  -4  10  113.67    6.62
  -7  -4  10  128.31   11.63
  -7  -4  10  120.24   11.26
   7   4 -10  122.69    6.84
   7   4 -10  112.91    6.77
   7   4 -10  117.73   13.96
   7   4 -10  112.81   11.57
  -7  -4  11   61.12    3.88
  -7  -4  11   59.52    3.99
  -7  -4  11   67.83    7.40
  -7  -4  11   56.81    7.00
   7   4 -11   54.66    3.72
   7   4 -11   53.43    4.07
   7   4 -11   73.31   10.91
   7   4 -11   56.63    7.59
  -7  -4  12   15.25    1.98
  -7  -4  12   21.29    3.75
  -7  -4  12   15.33    3.49
   7   4 -12   17.21    1.82
   7   4 -12   31.90    8.63
   7   4 -12   17.68    4.30
  -7  -4  13   11.28    1.72
  -7  -4  13   11.45    2.91
  -7  -4  13    8.86    2.75
   7   4 -13   11.34    1.51
   7   4 -13   12.57    8.15
   7   4 -13    6.30    3.68
  -7  -4  14    8.29    1.65
  -7  -4  14    8.76    2.73
   7   4 -14    9.68    1.38
   7   4 -14    9.34    9.03
   7   4 -14    4.74    3.58
  -7  -4  15    2.52    1.57
   7   4 -15   -0.98    6.15
   7   4 -15   -2.31    3.08
  -7  -3   1  945.30   46.99
   7   3  -1 1004.73   48.66
  -7  -3   2  602.13   29.53
  -7  -3   2  579.24   28.77
   7   3  -2  599.40   29.37
   7   3  -2  555.33   28.35
  -7  -3   3  155.94    8.30
  -7  -3   3  163.97    8.44
   7   3  -3  161.15    8.45
   7   3  -3  141.61    8.04
  -7  -3   4  623.29   31.25
  -7  -3   4  635.12   31.50
   7   3  -4  654.57   32.11
   7   3  -4  636.42   31.75
  -7  -3   5  599.22   28.55
   7   3  -5  487.05   25.50
  -7  -3   6  352.32   17.84
  -7  -3   6  347.56   17.65
   7   3  -6  328.05   17.16
   7   3  -6  369.52   18.50
  -7  -3   7   52.25    3.45
  -7  -3   7   59.15    3.67
   7   3  -7   60.57    3.74
   7   3  -7   56.58    3.71
  -7  -3   8   44.48    3.02
  -7  -3   8   47.26    3.18
  -7  -3   8   43.26    5.92
   7   3  -8   50.96    3.28
   7   3  -8   43.12    3.20
   7   3  -8   45.44    7.34
   7   3  -8   46.84    6.34
  -7  -3   9   21.93    1.91
  -7  -3   9   21.13    4.05
   7   3  -9   26.46    2.25
   7   3  -9   27.28    2.38
   7   3  -9   18.58    5.21
  -7  -3  10   79.73    4.82
  -7  -3  10   80.03    8.44
  -7  -3  10   73.69    8.26
   7   3 -10   73.82    4.51
   7   3 -10   78.31    9.97
   7   3 -10   72.15    8.74
  -7  -3  11   20.26    1.90
  -7  -3  11   22.92    2.16
  -7  -3  11   25.08    4.12
   7   3 -11   22.03    2.04
   7   3 -11   24.56    2.34
   7   3 -11   24.31    4.80
  -7  -3  12   56.72    3.73
  -7  -3  12   57.44    3.89
  -7  -3  12   60.16    7.11
   7   3 -12   57.26    3.80
   7   3 -12   61.60    9.75
   7   3 -12   53.92    7.92
  -7  -3  13   68.13    4.29
  -7  -3  13   64.21    4.25
  -7  -3  13   67.81    7.76
  -7  -3  13   64.33    7.65
   7   3 -13   69.48    4.33
   7   3 -13   65.43   10.91
   7   3 -13   61.29    8.59
  -7  -3  14   93.67    9.90
   7   3 -14   95.94    5.90
   7   3 -14  121.52   14.62
  -7  -3  15  139.18    8.00
  -7  -3  15  131.68   12.70
   7   3 -15  138.78    7.83
   7   3 -15  175.52   19.17
   7   3 -15  140.41   14.67
  -7  -3  16  189.87   15.88
   7   3 -16  161.61   18.37
  -7  -2   1  296.98   15.19
  -7  -2   1  305.36   15.39
  -7  -2   2  226.01   12.00
  -7  -2   2  229.78   11.97
   7   2  -2  253.15   12.67
   7   2  -2  262.52   13.13
  -7  -2   3    2.51    0.60
  -7  -2   3    4.18    0.74
   7   2  -3    3.19    0.70
   7   2  -3    3.82    0.75
  -7  -2   4  201.09   10.35
  -7  -2   4  197.77   10.19
   7   2  -4  198.40   10.26
   7   2  -4  178.54    9.82
  -7  -2   5   22.99    1.82
  -7  -2   5   24.28    1.87
  -7  -2   6    6.54    0.91
  -7  -2   6    7.56    1.06
   7   2  -6    8.33    1.12
   7   2  -6    4.50    1.05
  -7  -2   7  504.69   24.74
   7   2  -7  455.95   23.41
  -7  -2   8  295.21   15.46
  -7  -2   8  337.66   16.66
  -7  -2   8  286.67   23.00
  -7  -2   8  295.84   23.27
   7   2  -8  326.76   16.38
   7   2  -8  332.13   16.71
   7   2  -8  289.72   23.94
   7   2  -8  322.55   24.58
  -7  -2   9  253.00   13.21
  -7  -2   9  257.17   13.36
  -7  -2   9  265.21   20.39
  -7  -2   9  238.58   19.80
   7   2  -9  270.04   13.72
   7   2  -9  250.26   13.34
  -7  -2  10  199.62   10.47
  -7  -2  10  194.38   10.36
  -7  -2  10  191.40   16.09
  -7  -2  10  191.34   16.15
   7   2 -10  193.13   10.29
   7   2 -10  175.42    9.89
   7   2 -10  189.04   17.12
   7   2 -10  212.93   17.58
  -7  -2  11   73.16    4.46
  -7  -2  11   75.93    4.68
  -7  -2  11   79.74    8.22
  -7  -2  11   76.77    8.19
   7   2 -11   66.67    4.29
   7   2 -11   69.74    4.57
   7   2 -11   69.32    9.08
   7   2 -11   63.36    8.72
  -7  -2  12   89.93    5.35
  -7  -2  12   96.39    5.68
  -7  -2  12   94.93    9.53
  -7  -2  12   92.60    9.53
   7   2 -12   95.05    5.54
   7   2 -12   82.20    5.39
   7   2 -12   93.76   11.07
   7   2 -12   87.10   10.52
  -7  -2  13  151.92    8.66
  -7  -2  13  180.75   14.84
  -7  -2  13  155.04   14.20
   7   2 -13  178.05    9.39
   7   2 -13  160.02   16.06
   7   2 -13  153.62   15.68
  -7  -2  14  191.83   10.41
  -7  -2  14  188.70   10.41
  -7  -2  14  196.40   16.50
  -7  -2  14  167.93   15.94
   7   2 -14  241.33   11.90
   7   2 -14  245.15   20.81
   7   2 -14  181.92   18.18
  -7  -2  15   61.18    4.09
  -7  -2  15   57.31    7.07
   7   2 -15   56.45    3.83
   7   2 -15   54.29   10.21
   7   2 -15   50.03    9.31
  -7  -2  16   -0.06    1.04
   7   2 -16    3.54    4.40
   7   2 -16   -1.03    4.83
  -7  -1   1  110.85    6.13
   7   1  -1  122.00    6.51
  -7  -1   2  168.93    9.11
  -7  -1   2  180.40    9.35
   7   1  -2  196.43    9.83
   7   1  -2  179.24    9.47
   7   1  -3  206.20   10.67
  -7  -1   4 1223.95   61.00
  -7  -1   4 1283.78   62.60
   7   1  -4 1327.71   63.90
   7   1  -4 1268.36   62.34
  -7  -1   5  805.01   38.87
  -7  -1   5  766.10   37.72
   7   1  -5  725.28   36.63
   7   1  -5  757.52   37.63
  -7  -1   6  227.42   11.97
  -7  -1   6  235.18   12.18
   7   1  -6  232.16   12.13
   7   1  -6  248.95   12.69
  -7  -1   7  390.10   20.40
  -7  -1   7  443.25   21.89
   7   1  -7  489.00   23.27
   7   1  -7  397.53   20.65
  -7  -1   8  180.90    9.74
  -7  -1   8  203.96   10.42
   7   1  -8  177.60    9.71
   7   1  -8  189.19   10.15
  -7  -1   9   26.33    2.13
  -7  -1   9   24.85    2.27
  -7  -1   9   28.85    4.67
  -7  -1   9   32.46    4.77
   7   1  -9   36.52    5.17
   7   1  -9   31.21    5.58
  -7  -1  10   40.64    2.79
  -7  -1  10   36.54    5.45
   7   1 -10   37.89    2.88
   7   1 -10   35.45    5.83
  -7  -1  11   39.88    2.94
  -7  -1  11   34.29    5.47
  -7  -1  11   42.75    5.71
   7   1 -11   40.03    2.85
   7   1 -11   36.98    6.02
   7   1 -11   38.89    6.88
  -7  -1  12   -0.01    0.54
  -7  -1  12    0.05    0.85
  -7  -1  12   -0.12    0.97
   7   1 -12    0.81    0.69
   7   1 -12    0.28    0.80
   7   1 -12   -0.10    2.17
   7   1 -12    2.43    3.47
  -7  -1  13    3.52    0.87
  -7  -1  13    1.91    1.21
  -7  -1  13    2.37    1.68
  -7  -1  13    3.52    1.88
   7   1 -13    3.84    1.03
   7   1 -13    4.61    1.32
   7   1 -13    2.75    2.88
   7   1 -13   -0.61    3.87
  -7  -1  14   10.93    1.36
  -7  -1  14   11.69    1.65
  -7  -1  14    9.63    2.72
  -7  -1  14    8.99    2.78
   7   1 -14    7.64    1.34
   7   1 -14    8.58    4.49
   7   1 -14   10.03    5.01
  -7  -1  15  148.88    8.26
  -7  -1  15  144.97    8.30
  -7  -1  15  150.90   13.39
   7   1 -15  140.77    8.03
   7   1 -15  159.13   15.69
  -7  -1  16  163.87    9.12
  -7  -1  16  155.47   14.12
   7   1 -16  157.23    8.77
   7   1 -16  158.62   17.21
  -7  -1  17   89.43    9.20
   7   1 -17   73.93   10.93
  -7   0   1 1030.09   50.85
  -7   0   1 1031.74   50.81
   7   0  -1 1083.98   52.31
   7   0  -1 1050.12   51.47
  -7   0   2  780.44   38.54
   7   0  -2  789.19   38.81
  -7   0   3   85.16    4.76
  -7   0   3   80.70    4.60
   7   0  -3   93.64    5.01
   7   0  -3   78.00    4.63
  -7   0   4   31.71    2.31
   7   0  -4   42.87    2.64
  -7   0   5  238.15   12.23
  -7   0   5  214.17   11.54
   7   0  -5  254.38   12.70
   7   0  -5  245.92   12.54
  -7   0   6   82.21    4.69
  -7   0   6   73.88    4.44
   7   0  -6   76.07    4.47
   7   0  -6   70.33    4.33
  -7   0   7    1.41    0.65
   7   0  -7    1.19    0.73
  -7   0   8    2.11    0.66
  -7   0   8    3.23    1.05
   7   0  -8    3.31    0.87
   7   0  -8    1.98    0.78
  -7   0   9  108.96    6.41
  -7   0   9  129.00    7.06
  -7   0   9  115.09   11.43
  -7   0   9  128.65   11.63
   7   0  -9  128.21    7.01
   7   0  -9  124.16    6.94
   7   0  -9  126.63   12.82
  -7   0  10  166.42    9.27
  -7   0  10  177.85    9.68
  -7   0  10  188.46   15.79
  -7   0  10  191.84   15.73
   7   0 -10  179.25    9.68
   7   0 -10  180.98    9.80
   7   0 -10  184.04   15.78
   7   0 -10  199.42   17.47
  -7   0  11  173.90    9.55
  -7   0  11  184.65    9.95
  -7   0  11  179.33   15.74
  -7   0  11  190.55   15.90
   7   0 -11  182.60    9.85
   7   0 -11  182.60    9.98
   7   0 -11  192.40   16.28
   7   0 -11  213.68   18.34
  -7   0  12  216.93   11.50
  -7   0  12  218.78   11.64
  -7   0  12  195.16   17.62
  -7   0  12  225.93   18.30
   7   0 -12  236.46   12.27
   7   0 -12  213.55   11.68
   7   0 -12  234.45   18.93
   7   0 -12  241.14   20.78
  -7   0  13  299.27   15.93
  -7   0  13  332.86   16.96
  -7   0  13  281.46   23.78
  -7   0  13  333.37   25.03
   7   0 -13  376.56   26.81
   7   0 -13  348.71   28.14
  -7   0  14  170.24    9.62
  -7   0  14  170.77   15.64
  -7   0  14  203.80   16.44
   7   0 -14  182.10    9.92
   7   0 -14  196.02   16.94
   7   0 -14  201.22   19.31
  -7   0  15  103.40    6.02
  -7   0  15   92.68    5.87
   7   0 -15  119.19    6.55
   7   0 -15  100.22   11.33
   7   0 -15   91.20   13.20
  -7   0  16   58.41    4.22
  -7   0  16   67.27    7.56
   7   0 -16   63.31    4.17
   7   0 -16   70.92    9.30
   7   0 -16   60.26   12.39
  -7   0  17   40.33    5.52
   7   0 -17   28.76    6.52
  -7   1   1   24.89    1.76
  -7   1   1   28.85    1.86
  -7   1   2  101.37    5.59
  -7   1   2  102.45    5.59
   7  -1  -2  110.29    5.83
   7  -1  -2  109.22    5.87
  -7   1   3  321.53   16.23
   7  -1  -3  324.04   16.37
  -7   1   4   22.83    1.77
  -7   1   4   27.46    1.96
   7  -1  -4   27.42    1.95
   7  -1  -4   27.91    2.00
  -7   1   5   87.68    4.92
  -7   1   5   77.75    4.60
   7  -1  -5   91.63    5.06
   7  -1  -5   92.90    5.14
  -7   1   6  275.56   14.10
  -7   1   6  265.59   13.84
   7  -1  -6  285.38   14.41
   7  -1  -6  277.46   14.21
  -7   1   7  465.62   23.98
  -7   1   7  505.55   25.18
   7  -1  -7  536.70   26.05
   7  -1  -7  498.16   24.96
  -7   1   8  973.01   48.61
  -7   1   8 1001.66   49.47
   7  -1  -8 1098.61   52.21
   7  -1  -8  971.96   48.63
  -7   1   9  212.83   11.70
  -7   1   9  254.96   12.93
  -7   1   9  227.02   19.02
  -7   1   9  255.30   19.48
   7  -1  -9  267.48   13.28
   7  -1  -9  235.65   12.40
   7  -1  -9  226.81   18.83
   7  -1  -9  245.96   20.89
  -7   1  10  164.27   14.59
  -7   1  10  167.70   14.41
   7  -1 -10  159.40    8.75
   7  -1 -10  164.91    8.96
   7  -1 -10  169.76   14.57
   7  -1 -10  169.31   16.37
  -7   1  11  178.55   10.25
  -7   1  11  204.62   17.18
  -7   1  11  231.92   17.59
   7  -1 -11  189.87   10.48
   7  -1 -11  209.35   17.18
   7  -1 -11  237.90   20.18
  -7   1  12   56.55    3.88
  -7   1  12   62.98    7.65
  -7   1  12   62.20    7.42
   7  -1 -12   68.73    4.19
   7  -1 -12   68.07    7.73
   7  -1 -12   57.32    9.94
  -7   1  13    9.59    1.29
  -7   1  13    8.58    1.40
  -7   1  13   10.88    2.88
  -7   1  13    8.20    2.63
   7  -1 -13    8.20    1.24
   7  -1 -13   10.61    1.52
   7  -1 -13    8.39    2.95
   7  -1 -13    1.42    5.91
  -7   1  14    2.09    0.85
  -7   1  14    2.45    1.14
  -7   1  14    2.39    1.90
  -7   1  14    2.61    1.74
   7  -1 -14    2.77    0.95
   7  -1 -14    1.52    2.32
   7  -1 -14    0.13    5.97
  -7   1  15    0.80    0.75
  -7   1  15    0.85    1.07
  -7   1  15   -0.07    1.48
   7  -1 -15    0.73    0.71
   7  -1 -15    2.67    6.61
  -7   1  16   57.46    3.80
  -7   1  16   50.34    3.85
  -7   1  16   57.57    7.24
   7  -1 -16   58.05    3.88
   7  -1 -16   68.36    8.26
   7  -1 -16   44.44   11.76
  -7   1  17   33.64    2.88
   7  -1 -17   22.14    2.24
   7  -1 -17   26.99    5.46
   7  -1 -17   20.03    8.40
  -7   1  18   39.20    5.31
   7  -1 -18   22.79    6.09
  -7   2   2 1157.98   57.00
  -7   2   2 1120.99   55.96
   7  -2  -2 1245.48   59.46
   7  -2  -2 1195.37   58.11
  -7   2   3  384.96   18.91
  -7   2   3  355.89   18.11
   7  -2  -3  405.03   19.51
   7  -2  -3  341.85   17.75
  -7   2   4   15.85    1.31
  -7   2   4   14.08    1.34
   7  -2  -4   15.52    1.35
   7  -2  -4   14.91    1.34
  -7   2   5  825.12   41.69
   7  -2  -5  940.42   44.95
  -7   2   6  282.10   14.54
  -7   2   6  271.84   14.28
   7  -2  -6  311.76   15.41
   7  -2  -6  299.23   15.07
  -7   2   7  208.67   11.11
  -7   2   7  225.11   11.63
   7  -2  -7  228.59   11.71
   7  -2  -7  222.61   11.54
  -7   2   8   75.19    4.37
  -7   2   8   65.72    4.21
   7  -2  -8   79.53    4.53
   7  -2  -8   69.34    4.25
  -7   2   9   26.22    2.15
  -7   2   9   21.50    4.31
  -7   2   9   23.55    4.11
   7  -2  -9   25.15    2.02
   7  -2  -9   25.22    4.15
   7  -2  -9   27.85    6.58
  -7   2  10  132.00    7.64
  -7   2  10  155.65    8.39
  -7   2  10  152.56   13.77
  -7   2  10  164.01   13.70
   7  -2 -10  145.08    8.07
   7  -2 -10  160.04    8.52
   7  -2 -10  158.09   13.58
   7  -2 -10  158.77   15.88
  -7   2  11   84.23    5.12
  -7   2  11   90.93    5.48
  -7   2  11   93.45    9.91
  -7   2  11   94.00    9.52
   7  -2 -11  100.07    5.69
   7  -2 -11   94.38    5.52
   7  -2 -11   98.90    9.70
   7  -2 -11   99.47   12.26
  -7   2  12   34.29    2.63
  -7   2  12   39.75    2.96
  -7   2  12   38.39    5.82
  -7   2  12   44.99    5.68
   7  -2 -12   33.71    2.68
   7  -2 -12   43.29    3.04
   7  -2 -12   45.85    5.78
   7  -2 -12   45.06    8.85
  -7   2  13  108.87    6.35
  -7   2  13  111.62    6.54
  -7   2  13  112.13   11.31
  -7   2  13  112.35   10.96
   7  -2 -13  113.93    6.52
   7  -2 -13  113.82    6.61
   7  -2 -13  120.00   11.29
   7  -2 -13  117.13   14.74
  -7   2  14  196.99   10.51
  -7   2  14  189.21   16.70
  -7   2  14  192.12   16.39
   7  -2 -14  192.96   10.52
   7  -2 -14  185.37   16.41
   7  -2 -14  245.89   22.45
  -7   2  15  137.11    7.86
  -7   2  15  152.83    8.45
  -7   2  15  131.47   13.21
  -7   2  15  152.31   13.41
   7  -2 -15  147.37    8.17
   7  -2 -15  147.72   13.66
   7  -2 -15  154.69   18.30
  -7   2  16  103.72   10.81
   7  -2 -16  119.25   11.62
  -7   2  17  110.67   10.77
   7  -2 -17  101.37    6.09
   7  -2 -17   89.14   16.02
  -7   2  18   45.10    6.07
   7  -2 -18   34.67    6.23
  -7   3   1   52.44    3.02
  -7   3   1   54.88    3.07
   7  -3  -1   51.14    2.97
   7  -3  -1   55.55    3.15
  -7   3   2   27.25    1.83
  -7   3   2   27.59    1.85
   7  -3  -2   31.45    1.95
   7  -3  -2   28.28    1.92
  -7   3   3  366.94   18.29
  -7   3   3  351.78   17.89
   7  -3  -3  369.28   18.36
   7  -3  -3  372.32   18.50
  -7   3   4  168.03    8.68
   7  -3  -4  161.77    8.55
  -7   3   5    0.71    0.46
  -7   3   5    0.45    0.54
   7  -3  -5    1.44    0.53
   7  -3  -5    0.61    0.56
  -7   3   6   26.17    1.94
  -7   3   6   28.48    2.10
   7  -3  -6   27.59    2.02
   7  -3  -6   26.67    1.99
  -7   3   7  162.90    9.00
  -7   3   7  181.65    9.59
   7  -3  -7  188.22    9.77
   7  -3  -7  197.54   10.01
  -7   3   8  313.17   16.37
   7  -3  -8  359.97   17.70
  -7   3   9  331.70   17.16
  -7   3   9  330.93   17.21
  -7   3   9  325.13   25.71
  -7   3   9  377.61   26.70
   7  -3  -9  357.87   17.94
   7  -3  -9  345.02   17.54
   7  -3  -9  357.60   26.09
   7  -3  -9  332.85   27.72
  -7   3  10  391.05   20.73
  -7   3  10  409.31   21.29
  -7   3  10  449.50   32.50
  -7   3  10  445.79   31.89
   7  -3 -10  506.39   24.04
   7  -3 -10  443.39   22.19
   7  -3 -10  452.68   32.01
   7  -3 -10  412.04   33.45
  -7   3  11  246.89   13.06
  -7   3  11  242.29   13.04
  -7   3  11  267.13   20.53
   7  -3 -11  260.65   13.49
   7  -3 -11  249.60   13.17
   7  -3 -11  278.11   20.79
  -7   3  12   33.71    2.59
  -7   3  12   38.13    2.86
  -7   3  12   36.46    5.74
  -7   3  12   37.06    5.35
   7  -3 -12   37.90    2.77
   7  -3 -12   35.81    2.71
   7  -3 -12   42.21    5.50
   7  -3 -12   42.21    9.25
  -7   3  13  105.62    6.05
  -7   3  13   97.63    5.93
  -7   3  13  100.96   10.61
   7  -3 -13  104.66    6.05
   7  -3 -13  102.03    6.01
   7  -3 -13  106.42   14.33
  -7   3  14  267.54   13.92
  -7   3  14  251.86   13.63
  -7   3  14  275.23   21.20
   7  -3 -14  246.13   13.37
   7  -3 -14  273.94   14.18
   7  -3 -14  280.03   21.41
  -7   3  15   63.06    4.51
  -7   3  15   71.16    8.73
  -7   3  15   80.73    8.56
[truncated: 1,751,632 more chars]
