# Supplementary material for: Platinum(0)-η2-1,2-(E)ditosylethene Complexes Bearing Phosphine, Isocyanide and N-Heterocyclic Carbene Ligands: Synthesis and Cytotoxicity towards Ovarian and Breast Cancer Cells
Source: Molecules. 2024 Mar 1;29(5):1119. doi: 10.3390/molecules29051119 (PMC10934098; doi:10.3390/molecules29051119)
Supplement: Supplementary file 1 [file molecules-29-01119-s001.zip › 4b.cif]

data_NC9

_publ_section_title
;
Platinum - trans-sulfone based organometallic complexes
;
 
_publ_contact_author_name        'Nicola Demitri'
_publ_contact_author_address     
;
Elettra-Sincrotrone Trieste, S.S. 14 Km 163.5 in Area Science Park, 
34149 Basovizza - Trieste, Italy.
;
_publ_contact_author_email       nicola.demitri@elettra.eu
_publ_contact_author_phone       '+39 040 375 8861'
loop_
_publ_author_name
_publ_author_address
'Demitri, Nicola'
;
Elettra-Sincrotrone Trieste, S.S. 14 Km 163.5 in Area Science Park, 
34149 Basovizza-Trieste, Italy.
;
'Visentin, Fabiano'
;
Dipartimento di Scienze Molecolari e Nanosistemi, Universita' Ca' Foscari,
Campus Scientifico - Via Torino 155, 30174 Venezia-Mestre, Italy.
;

_publ_section_abstract
;
The structure of NC9, PtC~43~H~37~F~3~NO~4~PS~2~, at 100 K has
triclinic (<i>P</i>1) symmetry. 
;
_publ_contact_letter 
;
Please consider this CIF for publication. I certify that this contibution is the
original work of those listed as authors; that it has not been published
before (in any language or medium) and is not being considered for publication
elsewhere; that all authors concur with and are aware of the submission; that
all workers involved in the study are listed as authors or given proper credit
in the acknowledgements; that I have obtained permission for and acknowledged
the source of any excerpts from other copyright works; and that to the best of
my knowledge the paper contains no statements which are libellous, unlawful or
in any way actionable. All coauthors have made significant scientific
contributions to the work reported, including the ideas and their execution,
and share responsibility and accountability for the results.
;

_audit_creation_method            'SHELXL-2019/3'
_shelx_SHELXL_version_number      '2019/3'
_chemical_name_systematic         ?
_chemical_name_common             ?
_chemical_melting_point           ?
_chemical_formula_moiety
 'C43 H37 F3 N O4 P Pt S2'
_chemical_formula_sum
 'C43 H37 F3 N O4 P Pt S2'
_chemical_formula_weight          978.91

loop_
 _atom_type_symbol
 _atom_type_description
 _atom_type_scat_dispersion_real
 _atom_type_scat_dispersion_imag
 _atom_type_scat_source
 'C'  'C'   0.0020   0.0012
 'International Tables Vol C Tables 4.2.6.8 and 6.1.1.4'
 'N'  'N'   0.0042   0.0025
 'International Tables Vol C Tables 4.2.6.8 and 6.1.1.4'
 'O'  'O'   0.0077   0.0045
 'International Tables Vol C Tables 4.2.6.8 and 6.1.1.4'
 'S'  'S'   0.0994   0.0945
 'International Tables Vol C Tables 4.2.6.8 and 6.1.1.4'
 'Pt'  'Pt'  -0.8479   6.7557
 'International Tables Vol C Tables 4.2.6.8 and 6.1.1.4'
 'F'  'F'   0.0129   0.0077
 'International Tables Vol C Tables 4.2.6.8 and 6.1.1.4'
 'P'  'P'   0.0809   0.0720
 'International Tables Vol C Tables 4.2.6.8 and 6.1.1.4'
 'H'  'H'   0.0000   0.0000
 'International Tables Vol C Tables 4.2.6.8 and 6.1.1.4'
 
_space_group_crystal_system       triclinic
_space_group_IT_number            1
_space_group_name_H-M_alt         'P 1'
_space_group_name_Hall            'P 1'
 
_shelx_space_group_comment
;
The symmetry employed for this shelxl refinement is uniquely defined
by the following loop, which should always be used as a source of
symmetry information in preference to the above space-group names.
They are only intended as comments.
;
 
loop_
 _space_group_symop_operation_xyz
 'x, y, z'
 
_cell_length_a                    11.488(2)
_cell_length_b                    14.203(3)
_cell_length_c                    14.404(3)
_cell_angle_alpha                 62.21(3)
_cell_angle_beta                  75.71(3)
_cell_angle_gamma                 74.35(3)
_cell_volume                      1981.8(9)
_cell_formula_units_Z             2
_cell_measurement_temperature     100(2)
_cell_measurement_reflns_used     10821
_cell_measurement_theta_min       1.408
_cell_measurement_theta_max       31.112
 
_exptl_crystal_description        'Thin rods'
_exptl_crystal_colour             'Colourless'
_exptl_crystal_density_meas       ?
_exptl_crystal_density_method     ?
_exptl_crystal_density_diffrn     1.640          
_exptl_crystal_F_000              972
_exptl_transmission_factor_min    ?
_exptl_transmission_factor_max    ?
_exptl_crystal_size_max           0.050
_exptl_crystal_size_mid           0.020
_exptl_crystal_size_min           0.020
_exptl_absorpt_coefficient_mu     2.618
_shelx_estimated_absorpt_T_min    0.880
_shelx_estimated_absorpt_T_max    0.950
_exptl_absorpt_correction_type    none
_exptl_absorpt_correction_T_min   ?
_exptl_absorpt_correction_T_max   ?
_exptl_absorpt_process_details    ?
_exptl_absorpt_special_details    ?
_diffrn_ambient_temperature       100(2)
_diffrn_radiation_wavelength      0.620

_diffrn_measurement_method       'Rotating crystal'
_diffrn_radiation_type           Synchrotron
_diffrn_source                   'Elettra Synchrotron - XRD2 BL'
_diffrn_measurement_device_type  
;
'Arinax MD2s Goniometer, Pilatus 6M detector'
;
_diffrn_detector_area_resol_mean  ?
_diffrn_reflns_number             70256
_diffrn_reflns_av_unetI/netI      0.0528
_diffrn_reflns_av_R_equivalents   0.0420
_diffrn_reflns_limit_h_min        -18
_diffrn_reflns_limit_h_max        18
_diffrn_reflns_limit_k_min        -22
_diffrn_reflns_limit_k_max        22
_diffrn_reflns_limit_l_min        -23
_diffrn_reflns_limit_l_max        23
_diffrn_reflns_theta_min          1.408
_diffrn_reflns_theta_max          29.999
_diffrn_reflns_theta_full         21.839
_diffrn_measured_fraction_theta_max   0.952
_diffrn_measured_fraction_theta_full  0.999
_diffrn_reflns_Laue_measured_fraction_max    0.952
_diffrn_reflns_Laue_measured_fraction_full   0.999
_diffrn_reflns_point_group_measured_fraction_max   0.900
_diffrn_reflns_point_group_measured_fraction_full  0.976
_reflns_number_total              31365
_reflns_number_gt                 29616
_reflns_threshold_expression      'I > 2\s(I)'
_reflns_Friedel_coverage          0.892
_reflns_Friedel_fraction_max      0.848
_reflns_Friedel_fraction_full     0.953
 
_reflns_special_details
;
 Reflections were merged by SHELXL according to the crystal
 class for the calculation of statistics and refinement.
 
 _reflns_Friedel_fraction is defined as the number of unique
 Friedel pairs measured divided by the number that would be
 possible theoretically, ignoring centric projections and
 systematic absences. Completness statistics refer to single and
 composite reflections containing twin component 1 only.
;

_diffrn_standards_number 0
_diffrn_standards_interval_count 0
_diffrn_standards_decay_% 0
 
_computing_data_collection       'Elettra XRD2 Data Collection SW'
_computing_cell_refinement       'XDS (Kabsch, 2010)'
_computing_data_reduction        'XDS (Kabsch, 2010)'
_computing_structure_solution    'SHELXT (Sheldrick, 2015)'
_computing_structure_refinement 'SHELXL-2019/3 (Sheldrick, 2015)'
_computing_molecular_graphics    'Ortep3 for Windows - Coot'
_computing_publication_material  'enCIFer - publCIF'
 
_refine_special_details
;
Hydrogen atoms were included at calculated positions with isotropic 
Ufactors=1.2Ueq or Ufactors=1.5Ueq for methyl groups. Anisotropic thermal
motion modeling has been applied to all atoms. Refined as a 2-component 
inversion twin.
;
_refine_ls_structure_factor_coef  Fsqd
_refine_ls_matrix_type            full
_refine_ls_weighting_scheme       calc
_refine_ls_weighting_details
'w=1/[\s^2^(Fo^2^)+(0.0260P)^2^] where P=(Fo^2^+2Fc^2^)/3'
_atom_sites_solution_primary      direct
_atom_sites_solution_secondary    difmap
_atom_sites_solution_hydrogens    geom
_refine_ls_hydrogen_treatment     constr
_refine_ls_extinction_method      none
_refine_ls_extinction_coef        .
_refine_ls_abs_structure_details
;
 Refined as an inversion twin.
;
_refine_ls_abs_structure_Flack    0.299(4)
_chemical_absolute_configuration  ?
_refine_ls_number_reflns          31365
_refine_ls_number_parameters      1000
_refine_ls_number_restraints      3
_refine_ls_R_factor_all           0.0301
_refine_ls_R_factor_gt            0.0277
_refine_ls_wR_factor_ref          0.0628
_refine_ls_wR_factor_gt           0.0618
_refine_ls_goodness_of_fit_ref    1.109
_refine_ls_restrained_S_all       1.109
_refine_ls_shift/su_max           0.001
_refine_ls_shift/su_mean          0.000
 
loop_
 _atom_site_label
 _atom_site_type_symbol
 _atom_site_fract_x
 _atom_site_fract_y
 _atom_site_fract_z
 _atom_site_U_iso_or_equiv
 _atom_site_adp_type
 _atom_site_occupancy
 _atom_site_site_symmetry_order  
 _atom_site_calc_flag
 _atom_site_refinement_flags_posn
 _atom_site_refinement_flags_adp
 _atom_site_refinement_flags_occupancy
 _atom_site_disorder_assembly
 _atom_site_disorder_group
Pt_11 Pt 0.40542(2) 0.71934(2) 0.14001(2) 0.01445(3) Uani 1 1 d . . . . .
C8_12 C 0.5244(4) 0.2976(3) 0.4290(3) 0.0214(6) Uani 1 1 d . . . . .
H8_12 H 0.600989 0.319997 0.396924 0.026 Uiso 1 1 calc R U . . .
C7_12 C 0.5170(4) 0.1888(3) 0.4750(3) 0.0246(7) Uani 1 1 d . . . . .
H7_12 H 0.589033 0.136951 0.473992 0.029 Uiso 1 1 calc R U . . .
C6_12 C 0.4057(4) 0.1544(3) 0.5227(3) 0.0263(8) Uani 1 1 d . . . . .
C9_12 C 0.3971(5) 0.0362(4) 0.5741(4) 0.0373(11) Uani 1 1 d . . . . .
H9A_12 H 0.476573 -0.006033 0.560128 0.056 Uiso 1 1 calc R U . . .
H9B_12 H 0.335677 0.025642 0.544863 0.056 Uiso 1 1 calc R U . . .
H9C_12 H 0.373427 0.012075 0.650799 0.056 Uiso 1 1 calc R U . . .
C5_12 C 0.2993(4) 0.2326(3) 0.5211(4) 0.0262(8) Uani 1 1 d . . . . .
H5_12 H 0.222511 0.210368 0.551992 0.031 Uiso 1 1 calc R U . . .
C4_12 C 0.3053(4) 0.3419(3) 0.4750(3) 0.0219(7) Uani 1 1 d . . . . .
H4_12 H 0.233276 0.394325 0.473945 0.026 Uiso 1 1 calc R U . . .
C3_12 C 0.4191(3) 0.3738(3) 0.4301(3) 0.0182(6) Uani 1 1 d . . . . .
S1_12 S 0.42763(9) 0.51169(7) 0.37397(7) 0.01707(14) Uani 1 1 d . . . . .
O1_12 O 0.3413(3) 0.5589(2) 0.4393(2) 0.0228(5) Uani 1 1 d . . . . .
O2_12 O 0.5553(3) 0.5182(2) 0.3568(2) 0.0235(5) Uani 1 1 d . . . . .
C1_12 C 0.3754(3) 0.5665(3) 0.2520(3) 0.0174(6) Uani 1 1 d . . . . .
H1_12 H 0.292962 0.552279 0.256924 0.021 Uiso 1 1 calc R U . . .
C2_12 C 0.4616(3) 0.5594(3) 0.1611(3) 0.0169(6) Uani 1 1 d . . . . .
H2_12 H 0.547629 0.528767 0.176421 0.020 Uiso 1 1 calc R U . . .
S2_12 S 0.42063(9) 0.51374(7) 0.08255(7) 0.01798(15) Uani 1 1 d . . . . .
O4_12 O 0.5000(3) 0.5467(3) -0.0177(2) 0.0287(6) Uani 1 1 d . . . . .
O3_12 O 0.2910(3) 0.5432(3) 0.0825(3) 0.0254(6) Uani 1 1 d . . . . .
C10_12 C 0.4575(4) 0.3710(3) 0.1487(3) 0.0200(6) Uani 1 1 d . . . . .
C15_12 C 0.5776(4) 0.3206(3) 0.1315(4) 0.0266(8) Uani 1 1 d . . . . .
H15_12 H 0.637239 0.361626 0.082180 0.032 Uiso 1 1 calc R U . . .
C14_12 C 0.6086(5) 0.2090(4) 0.1881(4) 0.0337(10) Uani 1 1 d . . . . .
H14_12 H 0.690670 0.174263 0.177900 0.040 Uiso 1 1 calc R U . . .
C13_12 C 0.5240(6) 0.1483(4) 0.2579(5) 0.0307(11) Uani 1 1 d . . . . .
C16_12 C 0.5608(7) 0.0277(4) 0.3216(5) 0.0455(14) Uani 1 1 d . . . . .
H16A_12 H 0.620845 -0.002976 0.276955 0.068 Uiso 1 1 calc R U . . .
H16B_12 H 0.488548 -0.006503 0.346626 0.068 Uiso 1 1 calc R U . . .
H16C_12 H 0.596658 0.014427 0.382644 0.068 Uiso 1 1 calc R U . . .
C12_12 C 0.4026(5) 0.1998(3) 0.2729(4) 0.0301(9) Uani 1 1 d . . . . .
H12_12 H 0.342318 0.158394 0.320225 0.036 Uiso 1 1 calc R U . . .
C11_12 C 0.3707(4) 0.3118(3) 0.2184(3) 0.0252(7) Uani 1 1 d . . . . .
H11_12 H 0.289107 0.347000 0.229459 0.030 Uiso 1 1 calc R U . . .
C7_13 C 0.6179(6) 0.7348(4) -0.2021(4) 0.0395(11) Uani 1 1 d . . . . .
H7A_13 H 0.530001 0.736787 -0.193239 0.059 Uiso 1 1 calc R U . . .
H7B_13 H 0.647742 0.689244 -0.133682 0.059 Uiso 1 1 calc R U . . .
H7C_13 H 0.660774 0.704971 -0.253037 0.059 Uiso 1 1 calc R U . . .
C2_13 C 0.6410(4) 0.8480(4) -0.2426(3) 0.0279(8) Uani 1 1 d . . . . .
C3_13 C 0.7139(4) 0.8957(4) -0.3390(3) 0.0330(10) Uani 1 1 d . . . . .
H3_13 H 0.749556 0.856565 -0.380616 0.040 Uiso 1 1 calc R U . . .
C4_13 C 0.7351(4) 0.9995(4) -0.3749(3) 0.0336(10) Uani 1 1 d . . . . .
H4_13 H 0.787553 1.029649 -0.439489 0.040 Uiso 1 1 calc R U . . .
C5_13 C 0.6814(4) 1.0589(4) -0.3185(4) 0.0318(9) Uani 1 1 d . . . . .
H5_13 H 0.695281 1.130599 -0.345432 0.038 Uiso 1 1 calc R U . . .
C6_13 C 0.6065(4) 1.0160(4) -0.2217(3) 0.0278(8) Uani 1 1 d . . . . .
C8_13 C 0.5448(5) 1.0810(5) -0.1593(5) 0.0394(11) Uani 1 1 d . . . . .
H8A_13 H 0.562853 1.154467 -0.198955 0.059 Uiso 1 1 calc R U . . .
H8B_13 H 0.575169 1.046512 -0.090857 0.059 Uiso 1 1 calc R U . . .
H8C_13 H 0.456365 1.084290 -0.147447 0.059 Uiso 1 1 calc R U . . .
C1_13 C 0.5903(4) 0.9101(3) -0.1860(3) 0.0230(7) Uani 1 1 d . . . . .
N_13 N 0.5220(3) 0.8626(3) -0.0862(3) 0.0243(6) Uani 1 1 d . . . . .
C_13 C 0.4763(4) 0.8130(3) 0.0000(3) 0.0218(7) Uani 1 1 d . . . . .
FA_14 F 0.6140(3) 0.7175(3) 0.5539(2) 0.0364(6) Uani 1 1 d . . . . .
FB_14 F -0.1879(3) 0.8513(3) 0.4301(2) 0.0267(6) Uani 1 1 d . . . . .
FC_14 F 0.3226(3) 1.2989(2) -0.0922(2) 0.0394(7) Uani 1 1 d . . . . .
C18_14 C 0.4081(4) 1.0385(3) 0.1218(3) 0.0249(7) Uani 1 1 d . . . . .
H18_14 H 0.466617 1.003364 0.169630 0.030 Uiso 1 1 calc R U . . .
C17_14 C 0.4072(5) 1.1469(3) 0.0488(4) 0.0298(9) Uani 1 1 d . . . . .
H17_14 H 0.463827 1.185940 0.046993 0.036 Uiso 1 1 calc R U . . .
C16_14 C 0.3227(5) 1.1950(3) -0.0197(3) 0.0286(8) Uani 1 1 d . . . . .
C15_14 C 0.2366(4) 1.1431(3) -0.0174(4) 0.0252(9) Uani 1 1 d . . . . .
H15_14 H 0.177454 1.179714 -0.064597 0.030 Uiso 1 1 calc R U . . .
C14_14 C 0.2377(4) 1.0360(3) 0.0555(3) 0.0223(7) Uani 1 1 d . . . . .
H14_14 H 0.178666 0.998832 0.058110 0.027 Uiso 1 1 calc R U . . .
C13_14 C 0.3249(3) 0.9819(3) 0.1253(3) 0.0177(6) Uani 1 1 d . . . . .
P_14 P 0.32228(9) 0.83958(7) 0.21470(7) 0.01530(15) Uani 1 1 d . . . . .
C7_14 C 0.1637(3) 0.8451(3) 0.2762(3) 0.0161(6) Uani 1 1 d . . . . .
C8_14 C 0.1034(3) 0.7604(3) 0.3043(3) 0.0194(6) Uani 1 1 d . . . . .
H8_14 H 0.144254 0.700968 0.288179 0.023 Uiso 1 1 calc R U . . .
C9_14 C -0.0155(4) 0.7625(3) 0.3556(3) 0.0223(7) Uani 1 1 d . . . . .
H9_14 H -0.057382 0.705404 0.374532 0.027 Uiso 1 1 calc R U . . .
C10_14 C -0.0717(3) 0.8496(3) 0.3786(3) 0.0191(6) Uani 1 1 d . . . . .
C11_14 C -0.0161(4) 0.9347(3) 0.3529(3) 0.0203(6) Uani 1 1 d . . . . .
H11_14 H -0.057709 0.993437 0.369871 0.024 Uiso 1 1 calc R U . . .
C12_14 C 0.1031(4) 0.9317(3) 0.3011(3) 0.0195(6) Uani 1 1 d . . . . .
H12_14 H 0.144086 0.989286 0.282324 0.023 Uiso 1 1 calc R U . . .
C1_14 C 0.4092(4) 0.8093(3) 0.3185(3) 0.0178(6) Uani 1 1 d . . . . .
C2_14 C 0.5356(4) 0.7852(4) 0.2995(4) 0.0222(8) Uani 1 1 d . . . . .
H2_14 H 0.574527 0.789008 0.231796 0.027 Uiso 1 1 calc R U . . .
C3_14 C 0.6063(4) 0.7555(3) 0.3779(4) 0.0254(7) Uani 1 1 d . . . . .
H3_14 H 0.692950 0.740928 0.364005 0.031 Uiso 1 1 calc R U . . .
C4_14 C 0.5473(4) 0.7478(3) 0.4760(3) 0.0267(8) Uani 1 1 d . . . . .
C5_14 C 0.4216(5) 0.7697(5) 0.4988(3) 0.0331(10) Uani 1 1 d . . . . .
H5_14 H 0.383425 0.764422 0.567107 0.040 Uiso 1 1 calc R U . . .
C6_14 C 0.3520(4) 0.7999(4) 0.4192(3) 0.0278(8) Uani 1 1 d . . . . .
H6_14 H 0.265416 0.814098 0.433501 0.033 Uiso 1 1 calc R U . . .
Pt_21 Pt -0.06702(2) 0.25646(2) 0.56658(2) 0.01397(3) Uani 1 1 d . . . . .
C8_22 C 0.0115(4) 0.5931(3) 0.1718(3) 0.0227(7) Uani 1 1 d . . . . .
H8_22 H 0.089933 0.559630 0.193352 0.027 Uiso 1 1 calc R U . . .
C7_22 C 0.0002(4) 0.6573(4) 0.0659(3) 0.0251(8) Uani 1 1 d . . . . .
H7_22 H 0.071511 0.668301 0.014816 0.030 Uiso 1 1 calc R U . . .
C6_22 C -0.1141(4) 0.7061(3) 0.0330(3) 0.0224(7) Uani 1 1 d . . . . .
C9_22 C -0.1241(5) 0.7781(4) -0.0828(3) 0.0345(10) Uani 1 1 d . . . . .
H9A_22 H -0.156636 0.852892 -0.092602 0.052 Uiso 1 1 calc R U . . .
H9B_22 H -0.179103 0.753780 -0.106063 0.052 Uiso 1 1 calc R U . . .
H9C_22 H -0.043139 0.774251 -0.124786 0.052 Uiso 1 1 calc R U . . .
C5_22 C -0.2179(4) 0.6878(3) 0.1089(3) 0.0232(7) Uani 1 1 d . . . . .
H5_22 H -0.296338 0.719738 0.087139 0.028 Uiso 1 1 calc R U . . .
C4_22 C -0.2087(3) 0.6238(3) 0.2157(3) 0.0200(6) Uani 1 1 d . . . . .
H4_22 H -0.279952 0.611400 0.266878 0.024 Uiso 1 1 calc R U . . .
C3_22 C -0.0930(3) 0.5781(3) 0.2463(3) 0.0166(6) Uani 1 1 d . . . . .
S1_22 S -0.07981(8) 0.50485(7) 0.38296(7) 0.01541(14) Uani 1 1 d . . . . .
O1_22 O -0.1733(3) 0.5590(2) 0.4379(2) 0.0202(5) Uani 1 1 d . . . . .
O2_22 O 0.0466(3) 0.4912(2) 0.3930(2) 0.0217(5) Uani 1 1 d . . . . .
C1_22 C -0.1160(3) 0.3783(3) 0.4227(3) 0.0164(6) Uani 1 1 d . . . . .
H1_22 H -0.197205 0.380130 0.407633 0.020 Uiso 1 1 calc R U . . .
C2_22 C -0.0170(3) 0.2957(3) 0.4058(3) 0.0168(6) Uani 1 1 d . . . . .
H2_22 H 0.063687 0.319956 0.376254 0.020 Uiso 1 1 calc R U . . .
S2_22 S -0.04346(10) 0.21565(7) 0.35346(7) 0.02042(16) Uani 1 1 d . . . . .
O4_22 O 0.0602(4) 0.1287(2) 0.3657(2) 0.0302(7) Uani 1 1 d . . . . .
O3_22 O -0.1636(4) 0.1902(3) 0.3944(3) 0.0280(8) Uani 1 1 d . . . . .
C10_22 C -0.0398(4) 0.3010(3) 0.2166(3) 0.0212(7) Uani 1 1 d . . . . .
C15_22 C 0.0707(5) 0.3047(4) 0.1505(4) 0.0328(10) Uani 1 1 d . . . . .
H15_22 H 0.143446 0.258915 0.177395 0.039 Uiso 1 1 calc R U . . .
C14_22 C 0.0733(6) 0.3772(4) 0.0433(4) 0.0404(13) Uani 1 1 d . . . . .
H14_22 H 0.148767 0.380700 -0.002780 0.048 Uiso 1 1 calc R U . . .
C13_22 C -0.0324(6) 0.4441(4) 0.0030(3) 0.0347(12) Uani 1 1 d . . . . .
C16_22 C -0.0276(8) 0.5218(5) -0.1130(4) 0.0503(17) Uani 1 1 d . . . . .
H16A_22 H 0.010870 0.581794 -0.127004 0.075 Uiso 1 1 calc R U . . .
H16B_22 H -0.110711 0.550206 -0.131208 0.075 Uiso 1 1 calc R U . . .
H16C_22 H 0.020183 0.483891 -0.156081 0.075 Uiso 1 1 calc R U . . .
C12_22 C -0.1420(5) 0.4391(4) 0.0703(4) 0.0328(9) Uani 1 1 d . . . . .
H12_22 H -0.214564 0.484687 0.042976 0.039 Uiso 1 1 calc R U . . .
C11_22 C -0.1476(5) 0.3683(4) 0.1777(3) 0.0293(8) Uani 1 1 d . . . . .
H11_22 H -0.223097 0.365672 0.223670 0.035 Uiso 1 1 calc R U . . .
C7_23 C 0.0704(4) -0.1090(4) 0.5988(4) 0.0291(9) Uani 1 1 d . . . . .
H7A_23 H 0.068814 -0.170659 0.586062 0.044 Uiso 1 1 calc R U . . .
H7B_23 H 0.113926 -0.057390 0.536113 0.044 Uiso 1 1 calc R U . . .
H7C_23 H -0.013379 -0.073462 0.612913 0.044 Uiso 1 1 calc R U . . .
C2_23 C 0.1348(4) -0.1483(3) 0.6929(3) 0.0187(7) Uani 1 1 d . . . . .
C3_23 C 0.1976(4) -0.2542(3) 0.7393(3) 0.0208(6) Uani 1 1 d . . . . .
H3_23 H 0.199817 -0.303641 0.711496 0.025 Uiso 1 1 calc R U . . .
C4_23 C 0.2568(4) -0.2881(3) 0.8258(3) 0.0228(7) Uani 1 1 d . . . . .
H4_23 H 0.299566 -0.360390 0.856320 0.027 Uiso 1 1 calc R U . . .
C5_23 C 0.2541(4) -0.2172(3) 0.8679(3) 0.0241(7) Uani 1 1 d . . . . .
H5_23 H 0.294847 -0.241617 0.927230 0.029 Uiso 1 1 calc R U . . .
C6_23 C 0.1924(4) -0.1108(3) 0.8244(3) 0.0222(7) Uani 1 1 d . . . . .
C8_23 C 0.1901(5) -0.0324(4) 0.8676(4) 0.0367(11) Uani 1 1 d . . . . .
H8A_23 H 0.240676 -0.067309 0.924664 0.055 Uiso 1 1 calc R U . . .
H8B_23 H 0.105889 -0.009793 0.895397 0.055 Uiso 1 1 calc R U . . .
H8C_23 H 0.222172 0.031071 0.810850 0.055 Uiso 1 1 calc R U . . .
C1_23 C 0.1337(3) -0.0802(3) 0.7380(3) 0.0181(6) Uani 1 1 d . . . . .
N_23 N 0.0702(3) 0.0259(3) 0.6931(3) 0.0213(6) Uani 1 1 d . . . . .
C_23 C 0.0170(3) 0.1122(3) 0.6489(3) 0.0180(6) Uani 1 1 d . . . . .
FA_24 F 0.1420(3) 0.6479(2) 0.5857(2) 0.0350(6) Uani 1 1 d . . . . .
FB_24 F -0.6619(2) 0.5225(2) 0.7416(2) 0.0285(6) Uani 1 1 d . . . . .
FC_24 F -0.1267(4) -0.0146(3) 1.1451(2) 0.0578(11) Uani 1 1 d . . . . .
C18_24 C -0.0909(4) 0.2320(4) 0.9077(3) 0.0241(7) Uani 1 1 d . . . . .
H18_24 H -0.067089 0.299229 0.885541 0.029 Uiso 1 1 calc R U . . .
C17_24 C -0.0897(5) 0.1553(4) 1.0133(3) 0.0324(9) Uani 1 1 d . . . . .
H17_24 H -0.065192 0.169553 1.063202 0.039 Uiso 1 1 calc R U . . .
C16_24 C -0.1247(5) 0.0596(4) 1.0428(3) 0.0363(11) Uani 1 1 d . . . . .
C15_24 C -0.1600(5) 0.0338(4) 0.9733(4) 0.0351(10) Uani 1 1 d . . . . .
H15_24 H -0.183419 -0.033871 0.996620 0.042 Uiso 1 1 calc R U . . .
C14_24 C -0.1601(4) 0.1106(3) 0.8679(3) 0.0254(8) Uani 1 1 d . . . . .
H14_24 H -0.182849 0.094833 0.818254 0.030 Uiso 1 1 calc R U . . .
C13_24 C -0.1269(4) 0.2107(3) 0.8347(3) 0.0193(6) Uani 1 1 d . . . . .
P_24 P -0.14468(8) 0.31157(7) 0.69928(7) 0.01467(14) Uani 1 1 d . . . . .
C7_24 C -0.3046(3) 0.3732(3) 0.7135(3) 0.0171(6) Uani 1 1 d . . . . .
C8_24 C -0.3731(3) 0.4095(3) 0.6319(3) 0.0201(6) Uani 1 1 d . . . . .
H8_24 H -0.337017 0.398647 0.569998 0.024 Uiso 1 1 calc R U . . .
C9_24 C -0.4939(4) 0.4615(3) 0.6403(3) 0.0234(7) Uani 1 1 d . . . . .
H9_24 H -0.540649 0.487283 0.584421 0.028 Uiso 1 1 calc R U . . .
C10_24 C -0.5436(3) 0.4747(3) 0.7312(3) 0.0205(6) Uani 1 1 d . . . . .
C11_24 C -0.4790(4) 0.4417(4) 0.8136(3) 0.0255(8) Uani 1 1 d . . . . .
H11_24 H -0.515632 0.454106 0.874624 0.031 Uiso 1 1 calc R U . . .
C12_24 C -0.3590(4) 0.3900(4) 0.8039(3) 0.0254(8) Uani 1 1 d . . . . .
H12_24 H -0.312750 0.365398 0.859860 0.030 Uiso 1 1 calc R U . . .
C1_24 C -0.0612(3) 0.4141(3) 0.6769(3) 0.0166(6) Uani 1 1 d . . . . .
C2_24 C 0.0653(4) 0.3873(3) 0.6735(3) 0.0221(7) Uani 1 1 d . . . . .
H2_24 H 0.104517 0.314116 0.691747 0.026 Uiso 1 1 calc R U . . .
C3_24 C 0.1348(4) 0.4651(4) 0.6441(3) 0.0259(7) Uani 1 1 d . . . . .
H3_24 H 0.220930 0.446484 0.642599 0.031 Uiso 1 1 calc R U . . .
C4_24 C 0.0754(4) 0.5698(3) 0.6171(3) 0.0248(7) Uani 1 1 d . . . . .
C5_24 C -0.0486(4) 0.6008(3) 0.6199(3) 0.0248(8) Uani 1 1 d . . . . .
H5_24 H -0.086321 0.674182 0.602172 0.030 Uiso 1 1 calc R U . . .
C6_24 C -0.1187(4) 0.5216(3) 0.6495(3) 0.0203(6) Uani 1 1 d . . . . .
H6_24 H -0.204778 0.541049 0.650815 0.024 Uiso 1 1 calc R U . . .
 
loop_
 _atom_site_aniso_label
 _atom_site_aniso_U_11
 _atom_site_aniso_U_22
 _atom_site_aniso_U_33
 _atom_site_aniso_U_23
 _atom_site_aniso_U_13
 _atom_site_aniso_U_12
Pt_11 0.01755(6) 0.01159(6) 0.01181(6) -0.00403(5) -0.00013(5) -0.00256(5)
C8_12 0.0187(15) 0.0212(15) 0.0213(15) -0.0067(13) -0.0030(13) -0.0034(13)
C7_12 0.0240(17) 0.0183(15) 0.0253(17) -0.0040(13) -0.0071(15) -0.0014(14)
C6_12 0.0297(19) 0.0161(15) 0.0255(18) -0.0024(13) -0.0049(16) -0.0037(14)
C9_12 0.042(3) 0.0167(17) 0.042(3) -0.0033(17) -0.003(2) -0.0078(18)
C5_12 0.0209(17) 0.0211(16) 0.0281(19) -0.0036(15) 0.0007(15) -0.0075(15)
C4_12 0.0188(15) 0.0215(15) 0.0199(15) -0.0051(13) -0.0004(13) -0.0043(13)
C3_12 0.0219(16) 0.0157(13) 0.0133(13) -0.0028(11) -0.0027(12) -0.0040(12)
S1_12 0.0211(4) 0.0162(3) 0.0123(3) -0.0042(3) -0.0017(3) -0.0050(3)
O1_12 0.0320(15) 0.0204(12) 0.0152(11) -0.0081(10) 0.0006(11) -0.0060(11)
O2_12 0.0229(13) 0.0256(13) 0.0204(12) -0.0053(10) -0.0035(11) -0.0101(11)
C1_12 0.0226(15) 0.0141(13) 0.0118(12) -0.0039(10) -0.0025(12) -0.0009(12)
C2_12 0.0236(15) 0.0127(12) 0.0138(13) -0.0063(11) -0.0005(12) -0.0033(12)
S2_12 0.0241(4) 0.0150(3) 0.0141(3) -0.0064(3) -0.0022(3) -0.0025(3)
O4_12 0.0430(18) 0.0268(14) 0.0169(12) -0.0117(11) 0.0033(12) -0.0098(14)
O3_12 0.0264(14) 0.0209(13) 0.0283(14) -0.0107(12) -0.0111(12) 0.0033(11)
C10_12 0.0238(16) 0.0170(14) 0.0208(15) -0.0099(12) -0.0055(13) -0.0006(13)
C15_12 0.0245(17) 0.0216(17) 0.034(2) -0.0150(16) -0.0019(16) -0.0006(15)
C14_12 0.035(2) 0.0228(18) 0.044(3) -0.0184(18) -0.013(2) 0.0071(17)
C13_12 0.046(3) 0.0160(17) 0.034(2) -0.0099(17) -0.020(2) 0.0009(17)
C16_12 0.070(4) 0.0178(18) 0.050(3) -0.0106(19) -0.030(3) 0.002(2)
C12_12 0.042(2) 0.0189(16) 0.0272(19) -0.0041(14) -0.0098(18) -0.0090(17)
C11_12 0.0280(19) 0.0210(16) 0.0256(17) -0.0081(14) -0.0084(16) -0.0022(15)
C7_13 0.046(3) 0.034(2) 0.034(2) -0.015(2) 0.008(2) -0.010(2)
C2_13 0.0254(18) 0.0286(19) 0.0185(16) -0.0052(14) 0.0008(14) -0.0007(16)
C3_13 0.0267(19) 0.037(2) 0.0199(17) -0.0070(16) 0.0057(16) -0.0005(18)
C4_13 0.0238(18) 0.039(2) 0.0180(16) 0.0016(16) 0.0018(15) -0.0042(18)
C5_13 0.0227(18) 0.031(2) 0.0251(18) 0.0018(16) -0.0003(16) -0.0087(17)
C6_13 0.0226(17) 0.0279(19) 0.0210(16) -0.0019(14) 0.0002(15) -0.0057(15)
C8_13 0.039(3) 0.035(2) 0.042(3) -0.017(2) 0.008(2) -0.015(2)
C1_13 0.0182(15) 0.0246(17) 0.0162(14) -0.0017(13) 0.0014(13) -0.0052(14)
N_13 0.0213(14) 0.0284(16) 0.0182(14) -0.0070(12) -0.0018(12) -0.0034(13)
C_13 0.0217(16) 0.0187(15) 0.0147(14) -0.0034(12) 0.0022(13) 0.0010(13)
FA_14 0.0417(16) 0.0392(15) 0.0273(13) -0.0049(11) -0.0191(12) -0.0103(13)
FB_14 0.0180(11) 0.0285(14) 0.0316(14) -0.0144(12) 0.0059(11) -0.0065(11)
FC_14 0.0471(18) 0.0151(11) 0.0363(15) 0.0008(10) 0.0048(14) -0.0072(11)
C18_14 0.033(2) 0.0184(15) 0.0229(16) -0.0054(13) -0.0050(16) -0.0098(15)
C17_14 0.039(2) 0.0195(16) 0.030(2) -0.0067(15) -0.0020(18) -0.0151(17)
C16_14 0.038(2) 0.0141(15) 0.0238(17) -0.0039(13) 0.0033(17) -0.0037(15)
C15_14 0.024(2) 0.0177(17) 0.0230(19) -0.0020(15) -0.0025(16) -0.0004(15)
C14_14 0.0268(17) 0.0174(15) 0.0208(15) -0.0069(13) -0.0036(14) -0.0034(14)
C13_14 0.0201(15) 0.0144(13) 0.0172(14) -0.0058(11) 0.0007(12) -0.0059(12)
P_14 0.0182(4) 0.0125(3) 0.0145(3) -0.0055(3) -0.0007(3) -0.0038(3)
C7_14 0.0179(14) 0.0137(13) 0.0162(13) -0.0069(11) 0.0000(12) -0.0033(11)
C8_14 0.0213(15) 0.0142(13) 0.0231(15) -0.0088(12) -0.0012(13) -0.0042(12)
C9_14 0.0223(16) 0.0167(14) 0.0281(18) -0.0100(13) 0.0003(14) -0.0066(13)
C10_14 0.0173(14) 0.0193(15) 0.0177(14) -0.0069(12) 0.0012(12) -0.0042(12)
C11_14 0.0216(15) 0.0183(14) 0.0214(15) -0.0107(13) 0.0007(13) -0.0035(13)
C12_14 0.0223(16) 0.0174(14) 0.0196(14) -0.0094(12) 0.0014(13) -0.0063(13)
C1_14 0.0242(17) 0.0140(14) 0.0153(14) -0.0049(12) -0.0034(13) -0.0056(13)
C2_14 0.0209(18) 0.0218(18) 0.0230(18) -0.0114(15) -0.0024(15) 0.0002(15)
C3_14 0.0246(17) 0.0225(16) 0.0314(19) -0.0144(15) -0.0085(16) 0.0020(14)
C4_14 0.033(2) 0.0230(17) 0.0219(16) -0.0031(14) -0.0125(16) -0.0066(16)
C5_14 0.037(2) 0.046(3) 0.0174(16) -0.0103(17) -0.0009(17) -0.018(2)
C6_14 0.0234(17) 0.043(2) 0.0170(15) -0.0123(16) 0.0030(14) -0.0132(18)
Pt_21 0.01860(7) 0.00979(5) 0.01152(6) -0.00392(4) -0.00159(5) -0.00120(5)
C8_22 0.0174(15) 0.0247(17) 0.0212(16) -0.0065(14) -0.0023(13) -0.0031(14)
C7_22 0.0207(16) 0.0273(18) 0.0171(15) -0.0028(14) 0.0013(14) -0.0050(15)
C6_22 0.0241(17) 0.0206(15) 0.0171(15) -0.0041(13) -0.0036(13) -0.0027(14)
C9_22 0.040(2) 0.035(2) 0.0166(16) -0.0030(16) -0.0054(17) -0.002(2)
C5_22 0.0223(16) 0.0234(16) 0.0179(15) -0.0055(13) -0.0055(14) 0.0011(14)
C4_22 0.0164(14) 0.0212(15) 0.0183(14) -0.0065(12) -0.0001(12) -0.0031(13)
C3_22 0.0202(15) 0.0130(12) 0.0134(13) -0.0037(11) -0.0024(12) -0.0019(12)
S1_22 0.0195(3) 0.0106(3) 0.0143(3) -0.0036(3) -0.0040(3) -0.0017(3)
O1_22 0.0275(13) 0.0141(10) 0.0172(11) -0.0071(9) -0.0019(10) -0.0013(10)
O2_22 0.0220(12) 0.0182(11) 0.0228(12) -0.0057(10) -0.0084(11) -0.0016(10)
C1_22 0.0207(15) 0.0114(12) 0.0135(13) -0.0029(10) 0.0005(12) -0.0046(12)
C2_22 0.0216(15) 0.0134(12) 0.0138(13) -0.0064(11) 0.0012(12) -0.0031(12)
S2_22 0.0336(5) 0.0134(3) 0.0142(3) -0.0061(3) -0.0010(3) -0.0060(3)
O4_22 0.049(2) 0.0150(11) 0.0242(13) -0.0107(10) -0.0054(14) 0.0020(12)
O3_22 0.041(2) 0.0277(16) 0.0176(13) -0.0089(12) 0.0051(14) -0.0197(16)
C10_22 0.0315(19) 0.0176(14) 0.0142(14) -0.0066(12) 0.0004(14) -0.0075(14)
C15_22 0.040(2) 0.0253(19) 0.0254(19) -0.0111(16) 0.0063(18) -0.0040(18)
C14_22 0.058(3) 0.029(2) 0.0213(18) -0.0092(16) 0.013(2) -0.007(2)
C13_22 0.065(4) 0.0249(19) 0.0142(16) -0.0081(15) 0.0006(19) -0.014(2)
C16_22 0.094(5) 0.034(2) 0.0159(18) -0.0051(17) -0.002(3) -0.016(3)
C12_22 0.044(3) 0.030(2) 0.0223(18) -0.0052(16) -0.0068(18) -0.013(2)
C11_22 0.034(2) 0.032(2) 0.0206(17) -0.0074(15) -0.0044(16) -0.0112(18)
C7_23 0.036(2) 0.0260(18) 0.0261(18) -0.0130(15) -0.0157(17) 0.0073(17)
C2_23 0.0195(17) 0.0159(15) 0.0170(16) -0.0055(13) -0.0024(14) -0.0006(13)
C3_23 0.0260(17) 0.0142(13) 0.0188(14) -0.0062(12) -0.0037(13) 0.0004(13)
C4_23 0.0277(18) 0.0143(14) 0.0199(15) -0.0041(12) -0.0073(14) 0.0036(13)
C5_23 0.0293(18) 0.0202(15) 0.0184(15) -0.0064(13) -0.0064(14) 0.0013(14)
C6_23 0.0277(18) 0.0173(14) 0.0200(15) -0.0081(12) -0.0069(14) 0.0018(13)
C8_23 0.045(3) 0.035(3) 0.041(3) -0.026(2) -0.020(2) 0.006(2)
C1_23 0.0208(15) 0.0116(12) 0.0184(14) -0.0045(11) -0.0041(12) 0.0001(11)
N_23 0.0247(15) 0.0146(12) 0.0218(14) -0.0075(11) -0.0024(12) -0.0004(12)
C_23 0.0216(15) 0.0144(13) 0.0158(13) -0.0048(11) -0.0026(12) -0.0033(12)
FA_24 0.0480(17) 0.0345(14) 0.0318(13) -0.0170(12) 0.0050(13) -0.0261(13)
FB_24 0.0200(11) 0.0304(13) 0.0347(14) -0.0185(12) -0.0055(11) 0.0060(10)
FC_24 0.083(3) 0.052(2) 0.0172(13) 0.0090(13) -0.0145(16) -0.019(2)
C18_24 0.0217(16) 0.0313(19) 0.0179(15) -0.0095(14) -0.0020(14) -0.0052(15)
C17_24 0.035(2) 0.043(2) 0.0165(16) -0.0087(16) -0.0085(16) -0.006(2)
C16_24 0.044(3) 0.037(2) 0.0141(15) 0.0011(15) -0.0078(17) -0.006(2)
C15_24 0.044(3) 0.029(2) 0.0210(18) 0.0007(16) -0.0039(19) -0.011(2)
C14_24 0.031(2) 0.0214(16) 0.0162(15) -0.0029(13) -0.0017(15) -0.0053(15)
C13_24 0.0216(15) 0.0188(14) 0.0128(13) -0.0038(11) -0.0039(12) -0.0008(13)
P_24 0.0177(4) 0.0133(3) 0.0116(3) -0.0050(3) -0.0018(3) -0.0015(3)
C7_24 0.0176(14) 0.0172(14) 0.0155(13) -0.0079(11) -0.0010(12) -0.0014(12)
C8_24 0.0195(15) 0.0234(16) 0.0157(14) -0.0087(12) -0.0031(12) -0.0002(13)
C9_24 0.0206(16) 0.0268(17) 0.0200(15) -0.0091(14) -0.0055(13) 0.0003(14)
C10_24 0.0178(14) 0.0176(14) 0.0250(16) -0.0106(13) -0.0031(13) 0.0012(12)
C11_24 0.0217(16) 0.035(2) 0.0256(17) -0.0209(17) -0.0038(14) 0.0019(15)
C12_24 0.0221(16) 0.037(2) 0.0198(16) -0.0178(15) -0.0050(14) 0.0030(16)
C1_24 0.0230(15) 0.0137(13) 0.0128(13) -0.0045(11) -0.0040(12) -0.0040(12)
C2_24 0.0197(15) 0.0229(17) 0.0258(17) -0.0141(15) 0.0008(14) -0.0040(14)
C3_24 0.0257(18) 0.0312(19) 0.0268(18) -0.0170(16) 0.0023(15) -0.0112(16)
C4_24 0.036(2) 0.0264(17) 0.0170(15) -0.0105(13) 0.0040(15) -0.0184(17)
C5_24 0.039(2) 0.0174(15) 0.0175(15) -0.0058(12) -0.0049(16) -0.0068(15)
C6_24 0.0260(17) 0.0172(14) 0.0175(14) -0.0072(12) -0.0057(13) -0.0018(13)
 
_geom_special_details
;
 All esds (except the esd in the dihedral angle between two l.s. planes)
 are estimated using the full covariance matrix.  The cell esds are taken
 into account individually in the estimation of esds in distances, angles
 and torsion angles; correlations between esds in cell parameters are only
 used when they are defined by crystal symmetry.  An approximate (isotropic)
 treatment of cell esds is used for estimating esds involving l.s. planes.
;
 
loop_
 _geom_bond_atom_site_label_1
 _geom_bond_atom_site_label_2
 _geom_bond_distance
 _geom_bond_site_symmetry_2
 _geom_bond_publ_flag
Pt_11 C_13 1.943(4) . ?
Pt_11 C1_12 2.073(4) . ?
Pt_11 C2_12 2.082(3) . ?
Pt_11 P_14 2.3048(11) . ?
C8_12 C7_12 1.386(6) . ?
C8_12 C3_12 1.391(5) . ?
C8_12 H8_12 0.9500 . ?
C7_12 C6_12 1.392(6) . ?
C7_12 H7_12 0.9500 . ?
C6_12 C5_12 1.409(6) . ?
C6_12 C9_12 1.507(6) . ?
C9_12 H9A_12 0.9800 . ?
C9_12 H9B_12 0.9800 . ?
C9_12 H9C_12 0.9800 . ?
C5_12 C4_12 1.389(6) . ?
C5_12 H5_12 0.9500 . ?
C4_12 C3_12 1.400(6) . ?
C4_12 H4_12 0.9500 . ?
C3_12 S1_12 1.757(4) . ?
S1_12 O1_12 1.444(3) . ?
S1_12 O2_12 1.447(3) . ?
S1_12 C1_12 1.745(3) . ?
C1_12 C2_12 1.461(5) . ?
C1_12 H1_12 1.0000 . ?
C2_12 S2_12 1.741(4) . ?
C2_12 H2_12 1.0000 . ?
S2_12 O3_12 1.434(3) . ?
S2_12 O4_12 1.444(3) . ?
S2_12 C10_12 1.770(4) . ?
C10_12 C11_12 1.371(6) . ?
C10_12 C15_12 1.393(6) . ?
C15_12 C14_12 1.392(6) . ?
C15_12 H15_12 0.9500 . ?
C14_12 C13_12 1.364(9) . ?
C14_12 H14_12 0.9500 . ?
C13_12 C12_12 1.406(8) . ?
C13_12 C16_12 1.514(7) . ?
C16_12 H16A_12 0.9800 . ?
C16_12 H16B_12 0.9800 . ?
C16_12 H16C_12 0.9800 . ?
C12_12 C11_12 1.394(6) . ?
C12_12 H12_12 0.9500 . ?
C11_12 H11_12 0.9500 . ?
C7_13 C2_13 1.508(7) . ?
C7_13 H7A_13 0.9800 . ?
C7_13 H7B_13 0.9800 . ?
C7_13 H7C_13 0.9800 . ?
C2_13 C1_13 1.393(6) . ?
C2_13 C3_13 1.394(6) . ?
C3_13 C4_13 1.386(8) . ?
C3_13 H3_13 0.9500 . ?
C4_13 C5_13 1.365(8) . ?
C4_13 H4_13 0.9500 . ?
C5_13 C6_13 1.397(6) . ?
C5_13 H5_13 0.9500 . ?
C6_13 C1_13 1.395(6) . ?
C6_13 C8_13 1.506(7) . ?
C8_13 H8A_13 0.9800 . ?
C8_13 H8B_13 0.9800 . ?
C8_13 H8C_13 0.9800 . ?
C1_13 N_13 1.401(5) . ?
N_13 C_13 1.173(5) . ?
FA_14 C4_14 1.352(5) . ?
FB_14 C10_14 1.357(5) . ?
FC_14 C16_14 1.353(5) . ?
C18_14 C13_14 1.384(5) . ?
C18_14 C17_14 1.401(6) . ?
C18_14 H18_14 0.9500 . ?
C17_14 C16_14 1.367(7) . ?
C17_14 H17_14 0.9500 . ?
C16_14 C15_14 1.370(7) . ?
C15_14 C14_14 1.387(6) . ?
C15_14 H15_14 0.9500 . ?
C14_14 C13_14 1.402(5) . ?
C14_14 H14_14 0.9500 . ?
C13_14 P_14 1.825(4) . ?
P_14 C7_14 1.817(4) . ?
P_14 C1_14 1.823(4) . ?
C7_14 C8_14 1.396(5) . ?
C7_14 C12_14 1.397(5) . ?
C8_14 C9_14 1.383(5) . ?
C8_14 H8_14 0.9500 . ?
C9_14 C10_14 1.379(5) . ?
C9_14 H9_14 0.9500 . ?
C10_14 C11_14 1.374(5) . ?
C11_14 C12_14 1.389(5) . ?
C11_14 H11_14 0.9500 . ?
C12_14 H12_14 0.9500 . ?
C1_14 C2_14 1.386(6) . ?
C1_14 C6_14 1.395(5) . ?
C2_14 C3_14 1.392(6) . ?
C2_14 H2_14 0.9500 . ?
C3_14 C4_14 1.375(6) . ?
C3_14 H3_14 0.9500 . ?
C4_14 C5_14 1.382(7) . ?
C5_14 C6_14 1.396(6) . ?
C5_14 H5_14 0.9500 . ?
C6_14 H6_14 0.9500 . ?
Pt_21 C_23 1.941(4) . ?
Pt_21 C1_22 2.077(3) . ?
Pt_21 C2_22 2.077(3) . ?
Pt_21 P_24 2.2890(10) . ?
C8_22 C7_22 1.383(6) . ?
C8_22 C3_22 1.388(5) . ?
C8_22 H8_22 0.9500 . ?
C7_22 C6_22 1.393(6) . ?
C7_22 H7_22 0.9500 . ?
C6_22 C5_22 1.394(6) . ?
C6_22 C9_22 1.510(6) . ?
C9_22 H9A_22 0.9800 . ?
C9_22 H9B_22 0.9800 . ?
C9_22 H9C_22 0.9800 . ?
C5_22 C4_22 1.389(5) . ?
C5_22 H5_22 0.9500 . ?
C4_22 C3_22 1.393(5) . ?
C4_22 H4_22 0.9500 . ?
C3_22 S1_22 1.770(4) . ?
S1_22 O1_22 1.440(3) . ?
S1_22 O2_22 1.447(3) . ?
S1_22 C1_22 1.748(4) . ?
C1_22 C2_22 1.462(5) . ?
C1_22 H1_22 1.0000 . ?
C2_22 S2_22 1.748(4) . ?
C2_22 H2_22 1.0000 . ?
S2_22 O3_22 1.432(4) . ?
S2_22 O4_22 1.443(3) . ?
S2_22 C10_22 1.765(4) . ?
C10_22 C15_22 1.384(6) . ?
C10_22 C11_22 1.402(6) . ?
C15_22 C14_22 1.399(7) . ?
C15_22 H15_22 0.9500 . ?
C14_22 C13_22 1.387(9) . ?
C14_22 H14_22 0.9500 . ?
C13_22 C12_22 1.383(8) . ?
C13_22 C16_22 1.511(7) . ?
C16_22 H16A_22 0.9800 . ?
C16_22 H16B_22 0.9800 . ?
C16_22 H16C_22 0.9800 . ?
C12_22 C11_22 1.394(6) . ?
C12_22 H12_22 0.9500 . ?
C11_22 H11_22 0.9500 . ?
C7_23 C2_23 1.504(6) . ?
C7_23 H7A_23 0.9800 . ?
C7_23 H7B_23 0.9800 . ?
C7_23 H7C_23 0.9800 . ?
C2_23 C1_23 1.390(5) . ?
C2_23 C3_23 1.394(5) . ?
C3_23 C4_23 1.389(5) . ?
C3_23 H3_23 0.9500 . ?
C4_23 C5_23 1.388(6) . ?
C4_23 H4_23 0.9500 . ?
C5_23 C6_23 1.392(5) . ?
C5_23 H5_23 0.9500 . ?
C6_23 C1_23 1.394(5) . ?
C6_23 C8_23 1.499(6) . ?
C8_23 H8A_23 0.9800 . ?
C8_23 H8B_23 0.9800 . ?
C8_23 H8C_23 0.9800 . ?
C1_23 N_23 1.398(5) . ?
N_23 C_23 1.157(5) . ?
FA_24 C4_24 1.356(5) . ?
FB_24 C10_24 1.352(4) . ?
FC_24 C16_24 1.353(5) . ?
C18_24 C13_24 1.396(5) . ?
C18_24 C17_24 1.399(6) . ?
C18_24 H18_24 0.9500 . ?
C17_24 C16_24 1.365(8) . ?
C17_24 H17_24 0.9500 . ?
C16_24 C15_24 1.387(8) . ?
C15_24 C14_24 1.397(6) . ?
C15_24 H15_24 0.9500 . ?
C14_24 C13_24 1.401(6) . ?
C14_24 H14_24 0.9500 . ?
C13_24 P_24 1.826(4) . ?
P_24 C7_24 1.816(4) . ?
P_24 C1_24 1.819(4) . ?
C7_24 C8_24 1.393(5) . ?
C7_24 C12_24 1.397(5) . ?
C8_24 C9_24 1.390(5) . ?
C8_24 H8_24 0.9500 . ?
C9_24 C10_24 1.371(5) . ?
C9_24 H9_24 0.9500 . ?
C10_24 C11_24 1.381(5) . ?
C11_24 C12_24 1.383(5) . ?
C11_24 H11_24 0.9500 . ?
C12_24 H12_24 0.9500 . ?
C1_24 C6_24 1.394(5) . ?
C1_24 C2_24 1.395(5) . ?
C2_24 C3_24 1.382(6) . ?
C2_24 H2_24 0.9500 . ?
C3_24 C4_24 1.369(6) . ?
C3_24 H3_24 0.9500 . ?
C4_24 C5_24 1.369(7) . ?
C5_24 C6_24 1.403(6) . ?
C5_24 H5_24 0.9500 . ?
C6_24 H6_24 0.9500 . ?
 
loop_
 _geom_angle_atom_site_label_1
 _geom_angle_atom_site_label_2
 _geom_angle_atom_site_label_3
 _geom_angle
 _geom_angle_site_symmetry_1
 _geom_angle_site_symmetry_3
 _geom_angle_publ_flag
C_13 Pt_11 C1_12 149.94(15) . . ?
C_13 Pt_11 C2_12 108.93(15) . . ?
C1_12 Pt_11 C2_12 41.18(13) . . ?
C_13 Pt_11 P_14 101.47(12) . . ?
C1_12 Pt_11 P_14 108.54(10) . . ?
C2_12 Pt_11 P_14 148.38(10) . . ?
C7_12 C8_12 C3_12 119.7(4) . . ?
C7_12 C8_12 H8_12 120.2 . . ?
C3_12 C8_12 H8_12 120.2 . . ?
C8_12 C7_12 C6_12 121.0(4) . . ?
C8_12 C7_12 H7_12 119.5 . . ?
C6_12 C7_12 H7_12 119.5 . . ?
C7_12 C6_12 C5_12 118.7(4) . . ?
C7_12 C6_12 C9_12 121.3(4) . . ?
C5_12 C6_12 C9_12 119.9(4) . . ?
C6_12 C9_12 H9A_12 109.5 . . ?
C6_12 C9_12 H9B_12 109.5 . . ?
H9A_12 C9_12 H9B_12 109.5 . . ?
C6_12 C9_12 H9C_12 109.5 . . ?
H9A_12 C9_12 H9C_12 109.5 . . ?
H9B_12 C9_12 H9C_12 109.5 . . ?
C4_12 C5_12 C6_12 120.9(4) . . ?
C4_12 C5_12 H5_12 119.6 . . ?
C6_12 C5_12 H5_12 119.6 . . ?
C5_12 C4_12 C3_12 119.1(4) . . ?
C5_12 C4_12 H4_12 120.5 . . ?
C3_12 C4_12 H4_12 120.5 . . ?
C8_12 C3_12 C4_12 120.6(4) . . ?
C8_12 C3_12 S1_12 120.1(3) . . ?
C4_12 C3_12 S1_12 119.3(3) . . ?
O1_12 S1_12 O2_12 119.18(19) . . ?
O1_12 S1_12 C1_12 107.80(17) . . ?
O2_12 S1_12 C1_12 109.55(18) . . ?
O1_12 S1_12 C3_12 107.80(18) . . ?
O2_12 S1_12 C3_12 107.02(18) . . ?
C1_12 S1_12 C3_12 104.52(18) . . ?
C2_12 C1_12 S1_12 118.7(3) . . ?
C2_12 C1_12 Pt_11 69.71(19) . . ?
S1_12 C1_12 Pt_11 119.2(2) . . ?
C2_12 C1_12 H1_12 114.1 . . ?
S1_12 C1_12 H1_12 114.1 . . ?
Pt_11 C1_12 H1_12 114.1 . . ?
C1_12 C2_12 S2_12 119.3(3) . . ?
C1_12 C2_12 Pt_11 69.11(19) . . ?
S2_12 C2_12 Pt_11 121.46(19) . . ?
C1_12 C2_12 H2_12 113.3 . . ?
S2_12 C2_12 H2_12 113.3 . . ?
Pt_11 C2_12 H2_12 113.3 . . ?
O3_12 S2_12 O4_12 118.8(2) . . ?
O3_12 S2_12 C2_12 109.47(18) . . ?
O4_12 S2_12 C2_12 108.14(19) . . ?
O3_12 S2_12 C10_12 107.9(2) . . ?
O4_12 S2_12 C10_12 107.02(19) . . ?
C2_12 S2_12 C10_12 104.50(17) . . ?
C11_12 C10_12 C15_12 120.8(4) . . ?
C11_12 C10_12 S2_12 120.6(3) . . ?
C15_12 C10_12 S2_12 118.5(3) . . ?
C14_12 C15_12 C10_12 118.7(4) . . ?
C14_12 C15_12 H15_12 120.7 . . ?
C10_12 C15_12 H15_12 120.7 . . ?
C13_12 C14_12 C15_12 121.6(5) . . ?
C13_12 C14_12 H14_12 119.2 . . ?
C15_12 C14_12 H14_12 119.2 . . ?
C14_12 C13_12 C12_12 119.2(4) . . ?
C14_12 C13_12 C16_12 120.7(6) . . ?
C12_12 C13_12 C16_12 120.1(6) . . ?
C13_12 C16_12 H16A_12 109.5 . . ?
C13_12 C16_12 H16B_12 109.5 . . ?
H16A_12 C16_12 H16B_12 109.5 . . ?
C13_12 C16_12 H16C_12 109.5 . . ?
H16A_12 C16_12 H16C_12 109.5 . . ?
H16B_12 C16_12 H16C_12 109.5 . . ?
C11_12 C12_12 C13_12 119.9(5) . . ?
C11_12 C12_12 H12_12 120.1 . . ?
C13_12 C12_12 H12_12 120.1 . . ?
C10_12 C11_12 C12_12 119.9(4) . . ?
C10_12 C11_12 H11_12 120.1 . . ?
C12_12 C11_12 H11_12 120.1 . . ?
C2_13 C7_13 H7A_13 109.5 . . ?
C2_13 C7_13 H7B_13 109.5 . . ?
H7A_13 C7_13 H7B_13 109.5 . . ?
C2_13 C7_13 H7C_13 109.5 . . ?
H7A_13 C7_13 H7C_13 109.5 . . ?
H7B_13 C7_13 H7C_13 109.5 . . ?
C1_13 C2_13 C3_13 116.8(5) . . ?
C1_13 C2_13 C7_13 121.7(4) . . ?
C3_13 C2_13 C7_13 121.5(4) . . ?
C4_13 C3_13 C2_13 120.8(5) . . ?
C4_13 C3_13 H3_13 119.6 . . ?
C2_13 C3_13 H3_13 119.6 . . ?
C5_13 C4_13 C3_13 120.7(4) . . ?
C5_13 C4_13 H4_13 119.7 . . ?
C3_13 C4_13 H4_13 119.7 . . ?
C4_13 C5_13 C6_13 121.2(5) . . ?
C4_13 C5_13 H5_13 119.4 . . ?
C6_13 C5_13 H5_13 119.4 . . ?
C1_13 C6_13 C5_13 116.7(4) . . ?
C1_13 C6_13 C8_13 121.4(4) . . ?
C5_13 C6_13 C8_13 121.9(5) . . ?
C6_13 C8_13 H8A_13 109.5 . . ?
C6_13 C8_13 H8B_13 109.5 . . ?
H8A_13 C8_13 H8B_13 109.5 . . ?
C6_13 C8_13 H8C_13 109.5 . . ?
H8A_13 C8_13 H8C_13 109.5 . . ?
H8B_13 C8_13 H8C_13 109.5 . . ?
C2_13 C1_13 C6_13 123.7(4) . . ?
C2_13 C1_13 N_13 118.3(4) . . ?
C6_13 C1_13 N_13 118.0(4) . . ?
C_13 N_13 C1_13 172.1(4) . . ?
N_13 C_13 Pt_11 174.8(4) . . ?
C13_14 C18_14 C17_14 121.0(4) . . ?
C13_14 C18_14 H18_14 119.5 . . ?
C17_14 C18_14 H18_14 119.5 . . ?
C16_14 C17_14 C18_14 118.2(4) . . ?
C16_14 C17_14 H17_14 120.9 . . ?
C18_14 C17_14 H17_14 120.9 . . ?
FC_14 C16_14 C17_14 118.8(4) . . ?
FC_14 C16_14 C15_14 118.3(4) . . ?
C17_14 C16_14 C15_14 122.9(4) . . ?
C16_14 C15_14 C14_14 118.5(4) . . ?
C16_14 C15_14 H15_14 120.7 . . ?
C14_14 C15_14 H15_14 120.7 . . ?
C15_14 C14_14 C13_14 120.8(4) . . ?
C15_14 C14_14 H14_14 119.6 . . ?
C13_14 C14_14 H14_14 119.6 . . ?
C18_14 C13_14 C14_14 118.6(3) . . ?
C18_14 C13_14 P_14 124.0(3) . . ?
C14_14 C13_14 P_14 117.5(3) . . ?
C7_14 P_14 C1_14 105.29(17) . . ?
C7_14 P_14 C13_14 101.40(17) . . ?
C1_14 P_14 C13_14 105.04(17) . . ?
C7_14 P_14 Pt_11 118.82(12) . . ?
C1_14 P_14 Pt_11 109.16(12) . . ?
C13_14 P_14 Pt_11 115.81(12) . . ?
C8_14 C7_14 C12_14 119.3(3) . . ?
C8_14 C7_14 P_14 120.5(3) . . ?
C12_14 C7_14 P_14 120.0(3) . . ?
C9_14 C8_14 C7_14 120.4(3) . . ?
C9_14 C8_14 H8_14 119.8 . . ?
C7_14 C8_14 H8_14 119.8 . . ?
C10_14 C9_14 C8_14 118.3(3) . . ?
C10_14 C9_14 H9_14 120.9 . . ?
C8_14 C9_14 H9_14 120.9 . . ?
FB_14 C10_14 C11_14 118.0(3) . . ?
FB_14 C10_14 C9_14 118.4(3) . . ?
C11_14 C10_14 C9_14 123.5(3) . . ?
C10_14 C11_14 C12_14 117.6(3) . . ?
C10_14 C11_14 H11_14 121.2 . . ?
C12_14 C11_14 H11_14 121.2 . . ?
C11_14 C12_14 C7_14 120.9(3) . . ?
C11_14 C12_14 H12_14 119.6 . . ?
C7_14 C12_14 H12_14 119.6 . . ?
C2_14 C1_14 C6_14 119.3(4) . . ?
C2_14 C1_14 P_14 118.6(3) . . ?
C6_14 C1_14 P_14 121.8(3) . . ?
C1_14 C2_14 C3_14 121.1(4) . . ?
C1_14 C2_14 H2_14 119.4 . . ?
C3_14 C2_14 H2_14 119.4 . . ?
C4_14 C3_14 C2_14 118.2(4) . . ?
C4_14 C3_14 H3_14 120.9 . . ?
C2_14 C3_14 H3_14 120.9 . . ?
FA_14 C4_14 C3_14 119.3(4) . . ?
FA_14 C4_14 C5_14 118.1(4) . . ?
C3_14 C4_14 C5_14 122.6(4) . . ?
C4_14 C5_14 C6_14 118.5(4) . . ?
C4_14 C5_14 H5_14 120.7 . . ?
C6_14 C5_14 H5_14 120.7 . . ?
C1_14 C6_14 C5_14 120.2(4) . . ?
C1_14 C6_14 H6_14 119.9 . . ?
C5_14 C6_14 H6_14 119.9 . . ?
C_23 Pt_21 C1_22 150.46(14) . . ?
C_23 Pt_21 C2_22 109.87(14) . . ?
C1_22 Pt_21 C2_22 41.21(13) . . ?
C_23 Pt_21 P_24 99.05(11) . . ?
C1_22 Pt_21 P_24 110.48(10) . . ?
C2_22 Pt_21 P_24 149.15(10) . . ?
C7_22 C8_22 C3_22 119.2(4) . . ?
C7_22 C8_22 H8_22 120.4 . . ?
C3_22 C8_22 H8_22 120.4 . . ?
C8_22 C7_22 C6_22 121.1(4) . . ?
C8_22 C7_22 H7_22 119.5 . . ?
C6_22 C7_22 H7_22 119.5 . . ?
C7_22 C6_22 C5_22 118.7(3) . . ?
C7_22 C6_22 C9_22 120.1(4) . . ?
C5_22 C6_22 C9_22 121.2(4) . . ?
C6_22 C9_22 H9A_22 109.5 . . ?
C6_22 C9_22 H9B_22 109.5 . . ?
H9A_22 C9_22 H9B_22 109.5 . . ?
C6_22 C9_22 H9C_22 109.5 . . ?
H9A_22 C9_22 H9C_22 109.5 . . ?
H9B_22 C9_22 H9C_22 109.5 . . ?
C4_22 C5_22 C6_22 121.3(4) . . ?
C4_22 C5_22 H5_22 119.4 . . ?
C6_22 C5_22 H5_22 119.4 . . ?
C5_22 C4_22 C3_22 118.6(3) . . ?
C5_22 C4_22 H4_22 120.7 . . ?
C3_22 C4_22 H4_22 120.7 . . ?
C8_22 C3_22 C4_22 121.1(3) . . ?
C8_22 C3_22 S1_22 119.8(3) . . ?
C4_22 C3_22 S1_22 119.0(3) . . ?
O1_22 S1_22 O2_22 119.00(17) . . ?
O1_22 S1_22 C1_22 107.06(17) . . ?
O2_22 S1_22 C1_22 109.36(17) . . ?
O1_22 S1_22 C3_22 107.30(16) . . ?
O2_22 S1_22 C3_22 107.12(18) . . ?
C1_22 S1_22 C3_22 106.32(17) . . ?
C2_22 C1_22 S1_22 116.8(3) . . ?
C2_22 C1_22 Pt_21 69.41(19) . . ?
S1_22 C1_22 Pt_21 117.08(19) . . ?
C2_22 C1_22 H1_22 115.3 . . ?
S1_22 C1_22 H1_22 115.3 . . ?
Pt_21 C1_22 H1_22 115.3 . . ?
C1_22 C2_22 S2_22 119.7(3) . . ?
C1_22 C2_22 Pt_21 69.38(19) . . ?
S2_22 C2_22 Pt_21 119.97(19) . . ?
C1_22 C2_22 H2_22 113.6 . . ?
S2_22 C2_22 H2_22 113.6 . . ?
Pt_21 C2_22 H2_22 113.6 . . ?
O3_22 S2_22 O4_22 119.1(2) . . ?
O3_22 S2_22 C2_22 110.2(2) . . ?
O4_22 S2_22 C2_22 107.36(19) . . ?
O3_22 S2_22 C10_22 107.8(2) . . ?
O4_22 S2_22 C10_22 107.42(19) . . ?
C2_22 S2_22 C10_22 103.95(17) . . ?
C15_22 C10_22 C11_22 121.1(4) . . ?
C15_22 C10_22 S2_22 119.3(3) . . ?
C11_22 C10_22 S2_22 119.5(3) . . ?
C10_22 C15_22 C14_22 118.7(5) . . ?
C10_22 C15_22 H15_22 120.7 . . ?
C14_22 C15_22 H15_22 120.7 . . ?
C13_22 C14_22 C15_22 121.2(5) . . ?
C13_22 C14_22 H14_22 119.4 . . ?
C15_22 C14_22 H14_22 119.4 . . ?
C12_22 C13_22 C14_22 119.3(4) . . ?
C12_22 C13_22 C16_22 120.4(6) . . ?
C14_22 C13_22 C16_22 120.3(6) . . ?
C13_22 C16_22 H16A_22 109.5 . . ?
C13_22 C16_22 H16B_22 109.5 . . ?
H16A_22 C16_22 H16B_22 109.5 . . ?
C13_22 C16_22 H16C_22 109.5 . . ?
H16A_22 C16_22 H16C_22 109.5 . . ?
H16B_22 C16_22 H16C_22 109.5 . . ?
C13_22 C12_22 C11_22 121.0(5) . . ?
C13_22 C12_22 H12_22 119.5 . . ?
C11_22 C12_22 H12_22 119.5 . . ?
C12_22 C11_22 C10_22 118.7(4) . . ?
C12_22 C11_22 H11_22 120.6 . . ?
C10_22 C11_22 H11_22 120.6 . . ?
C2_23 C7_23 H7A_23 109.5 . . ?
C2_23 C7_23 H7B_23 109.5 . . ?
H7A_23 C7_23 H7B_23 109.5 . . ?
C2_23 C7_23 H7C_23 109.5 . . ?
H7A_23 C7_23 H7C_23 109.5 . . ?
H7B_23 C7_23 H7C_23 109.5 . . ?
C1_23 C2_23 C3_23 116.9(3) . . ?
C1_23 C2_23 C7_23 121.2(3) . . ?
C3_23 C2_23 C7_23 121.9(4) . . ?
C4_23 C3_23 C2_23 120.7(3) . . ?
C4_23 C3_23 H3_23 119.6 . . ?
C2_23 C3_23 H3_23 119.6 . . ?
C5_23 C4_23 C3_23 120.5(3) . . ?
C5_23 C4_23 H4_23 119.7 . . ?
C3_23 C4_23 H4_23 119.7 . . ?
C4_23 C5_23 C6_23 120.8(4) . . ?
C4_23 C5_23 H5_23 119.6 . . ?
C6_23 C5_23 H5_23 119.6 . . ?
C5_23 C6_23 C1_23 116.8(3) . . ?
C5_23 C6_23 C8_23 121.7(4) . . ?
C1_23 C6_23 C8_23 121.5(3) . . ?
C6_23 C8_23 H8A_23 109.5 . . ?
C6_23 C8_23 H8B_23 109.5 . . ?
H8A_23 C8_23 H8B_23 109.5 . . ?
C6_23 C8_23 H8C_23 109.5 . . ?
H8A_23 C8_23 H8C_23 109.5 . . ?
H8B_23 C8_23 H8C_23 109.5 . . ?
C2_23 C1_23 C6_23 124.3(3) . . ?
C2_23 C1_23 N_23 117.6(3) . . ?
C6_23 C1_23 N_23 118.1(3) . . ?
C_23 N_23 C1_23 174.3(4) . . ?
N_23 C_23 Pt_21 176.4(3) . . ?
C13_24 C18_24 C17_24 120.6(4) . . ?
C13_24 C18_24 H18_24 119.7 . . ?
C17_24 C18_24 H18_24 119.7 . . ?
C16_24 C17_24 C18_24 118.3(4) . . ?
C16_24 C17_24 H17_24 120.9 . . ?
C18_24 C17_24 H17_24 120.9 . . ?
FC_24 C16_24 C17_24 119.1(5) . . ?
FC_24 C16_24 C15_24 117.4(5) . . ?
C17_24 C16_24 C15_24 123.5(4) . . ?
C16_24 C15_24 C14_24 117.8(5) . . ?
C16_24 C15_24 H15_24 121.1 . . ?
C14_24 C15_24 H15_24 121.1 . . ?
C15_24 C14_24 C13_24 120.6(4) . . ?
C15_24 C14_24 H14_24 119.7 . . ?
C13_24 C14_24 H14_24 119.7 . . ?
C18_24 C13_24 C14_24 119.2(3) . . ?
C18_24 C13_24 P_24 122.9(3) . . ?
C14_24 C13_24 P_24 117.7(3) . . ?
C7_24 P_24 C1_24 104.83(17) . . ?
C7_24 P_24 C13_24 101.95(17) . . ?
C1_24 P_24 C13_24 104.43(17) . . ?
C7_24 P_24 Pt_21 119.72(12) . . ?
C1_24 P_24 Pt_21 107.09(12) . . ?
C13_24 P_24 Pt_21 117.26(12) . . ?
C8_24 C7_24 C12_24 119.0(3) . . ?
C8_24 C7_24 P_24 120.3(3) . . ?
C12_24 C7_24 P_24 120.6(3) . . ?
C9_24 C8_24 C7_24 120.6(3) . . ?
C9_24 C8_24 H8_24 119.7 . . ?
C7_24 C8_24 H8_24 119.7 . . ?
C10_24 C9_24 C8_24 118.2(3) . . ?
C10_24 C9_24 H9_24 120.9 . . ?
C8_24 C9_24 H9_24 120.9 . . ?
FB_24 C10_24 C9_24 118.8(3) . . ?
FB_24 C10_24 C11_24 117.8(3) . . ?
C9_24 C10_24 C11_24 123.4(3) . . ?
C10_24 C11_24 C12_24 117.5(3) . . ?
C10_24 C11_24 H11_24 121.2 . . ?
C12_24 C11_24 H11_24 121.2 . . ?
C11_24 C12_24 C7_24 121.3(4) . . ?
C11_24 C12_24 H12_24 119.4 . . ?
C7_24 C12_24 H12_24 119.4 . . ?
C6_24 C1_24 C2_24 119.4(4) . . ?
C6_24 C1_24 P_24 121.2(3) . . ?
C2_24 C1_24 P_24 118.8(3) . . ?
C3_24 C2_24 C1_24 121.2(4) . . ?
C3_24 C2_24 H2_24 119.4 . . ?
C1_24 C2_24 H2_24 119.4 . . ?
C4_24 C3_24 C2_24 117.8(4) . . ?
C4_24 C3_24 H3_24 121.1 . . ?
C2_24 C3_24 H3_24 121.1 . . ?
FA_24 C4_24 C5_24 117.7(4) . . ?
FA_24 C4_24 C3_24 118.8(4) . . ?
C5_24 C4_24 C3_24 123.6(4) . . ?
C4_24 C5_24 C6_24 118.5(4) . . ?
C4_24 C5_24 H5_24 120.8 . . ?
C6_24 C5_24 H5_24 120.8 . . ?
C1_24 C6_24 C5_24 119.6(4) . . ?
C1_24 C6_24 H6_24 120.2 . . ?
C5_24 C6_24 H6_24 120.2 . . ?
 
loop_
 _geom_torsion_atom_site_label_1
 _geom_torsion_atom_site_label_2
 _geom_torsion_atom_site_label_3
 _geom_torsion_atom_site_label_4
 _geom_torsion
 _geom_torsion_site_symmetry_1
 _geom_torsion_site_symmetry_2
 _geom_torsion_site_symmetry_3
 _geom_torsion_site_symmetry_4
 _geom_torsion_publ_flag
C3_12 C8_12 C7_12 C6_12 -0.2(6) . . . . ?
C8_12 C7_12 C6_12 C5_12 1.6(7) . . . . ?
C8_12 C7_12 C6_12 C9_12 -179.2(4) . . . . ?
C7_12 C6_12 C5_12 C4_12 -1.4(7) . . . . ?
C9_12 C6_12 C5_12 C4_12 179.4(4) . . . . ?
C6_12 C5_12 C4_12 C3_12 -0.2(7) . . . . ?
C7_12 C8_12 C3_12 C4_12 -1.5(6) . . . . ?
C7_12 C8_12 C3_12 S1_12 179.0(3) . . . . ?
C5_12 C4_12 C3_12 C8_12 1.7(6) . . . . ?
C5_12 C4_12 C3_12 S1_12 -178.8(3) . . . . ?
C8_12 C3_12 S1_12 O1_12 -142.8(3) . . . . ?
C4_12 C3_12 S1_12 O1_12 37.7(4) . . . . ?
C8_12 C3_12 S1_12 O2_12 -13.5(4) . . . . ?
C4_12 C3_12 S1_12 O2_12 167.0(3) . . . . ?
C8_12 C3_12 S1_12 C1_12 102.7(3) . . . . ?
C4_12 C3_12 S1_12 C1_12 -76.8(3) . . . . ?
O1_12 S1_12 C1_12 C2_12 161.2(3) . . . . ?
O2_12 S1_12 C1_12 C2_12 30.1(3) . . . . ?
C3_12 S1_12 C1_12 C2_12 -84.3(3) . . . . ?
O1_12 S1_12 C1_12 Pt_11 79.6(2) . . . . ?
O2_12 S1_12 C1_12 Pt_11 -51.5(2) . . . . ?
C3_12 S1_12 C1_12 Pt_11 -165.9(2) . . . . ?
S1_12 C1_12 C2_12 S2_12 131.8(3) . . . . ?
Pt_11 C1_12 C2_12 S2_12 -115.2(2) . . . . ?
S1_12 C1_12 C2_12 Pt_11 -113.0(3) . . . . ?
C1_12 C2_12 S2_12 O3_12 30.8(3) . . . . ?
Pt_11 C2_12 S2_12 O3_12 -51.4(3) . . . . ?
C1_12 C2_12 S2_12 O4_12 161.6(3) . . . . ?
Pt_11 C2_12 S2_12 O4_12 79.5(3) . . . . ?
C1_12 C2_12 S2_12 C10_12 -84.6(3) . . . . ?
Pt_11 C2_12 S2_12 C10_12 -166.8(2) . . . . ?
O3_12 S2_12 C10_12 C11_12 -21.9(4) . . . . ?
O4_12 S2_12 C10_12 C11_12 -150.9(3) . . . . ?
C2_12 S2_12 C10_12 C11_12 94.6(3) . . . . ?
O3_12 S2_12 C10_12 C15_12 160.5(3) . . . . ?
O4_12 S2_12 C10_12 C15_12 31.5(4) . . . . ?
C2_12 S2_12 C10_12 C15_12 -83.0(3) . . . . ?
C11_12 C10_12 C15_12 C14_12 -1.3(6) . . . . ?
S2_12 C10_12 C15_12 C14_12 176.3(3) . . . . ?
C10_12 C15_12 C14_12 C13_12 1.3(7) . . . . ?
C15_12 C14_12 C13_12 C12_12 0.0(8) . . . . ?
C15_12 C14_12 C13_12 C16_12 -177.6(5) . . . . ?
C14_12 C13_12 C12_12 C11_12 -1.2(7) . . . . ?
C16_12 C13_12 C12_12 C11_12 176.4(5) . . . . ?
C15_12 C10_12 C11_12 C12_12 0.0(6) . . . . ?
S2_12 C10_12 C11_12 C12_12 -177.5(3) . . . . ?
C13_12 C12_12 C11_12 C10_12 1.2(7) . . . . ?
C1_13 C2_13 C3_13 C4_13 0.8(7) . . . . ?
C7_13 C2_13 C3_13 C4_13 -179.5(5) . . . . ?
C2_13 C3_13 C4_13 C5_13 -2.4(7) . . . . ?
C3_13 C4_13 C5_13 C6_13 1.8(7) . . . . ?
C4_13 C5_13 C6_13 C1_13 0.4(7) . . . . ?
C4_13 C5_13 C6_13 C8_13 -179.0(5) . . . . ?
C3_13 C2_13 C1_13 C6_13 1.5(7) . . . . ?
C7_13 C2_13 C1_13 C6_13 -178.2(5) . . . . ?
C3_13 C2_13 C1_13 N_13 -176.6(4) . . . . ?
C7_13 C2_13 C1_13 N_13 3.7(6) . . . . ?
C5_13 C6_13 C1_13 C2_13 -2.1(6) . . . . ?
C8_13 C6_13 C1_13 C2_13 177.3(5) . . . . ?
C5_13 C6_13 C1_13 N_13 176.1(4) . . . . ?
C8_13 C6_13 C1_13 N_13 -4.6(6) . . . . ?
C13_14 C18_14 C17_14 C16_14 -0.7(7) . . . . ?
C18_14 C17_14 C16_14 FC_14 -178.6(4) . . . . ?
C18_14 C17_14 C16_14 C15_14 2.4(7) . . . . ?
FC_14 C16_14 C15_14 C14_14 178.9(4) . . . . ?
C17_14 C16_14 C15_14 C14_14 -2.1(7) . . . . ?
C16_14 C15_14 C14_14 C13_14 0.0(6) . . . . ?
C17_14 C18_14 C13_14 C14_14 -1.3(6) . . . . ?
C17_14 C18_14 C13_14 P_14 178.0(3) . . . . ?
C15_14 C14_14 C13_14 C18_14 1.6(6) . . . . ?
C15_14 C14_14 C13_14 P_14 -177.7(3) . . . . ?
C18_14 C13_14 P_14 C7_14 128.0(3) . . . . ?
C14_14 C13_14 P_14 C7_14 -52.7(3) . . . . ?
C18_14 C13_14 P_14 C1_14 18.6(4) . . . . ?
C14_14 C13_14 P_14 C1_14 -162.2(3) . . . . ?
C18_14 C13_14 P_14 Pt_11 -101.9(3) . . . . ?
C14_14 C13_14 P_14 Pt_11 77.3(3) . . . . ?
C1_14 P_14 C7_14 C8_14 -105.0(3) . . . . ?
C13_14 P_14 C7_14 C8_14 145.8(3) . . . . ?
Pt_11 P_14 C7_14 C8_14 17.6(3) . . . . ?
C1_14 P_14 C7_14 C12_14 71.4(3) . . . . ?
C13_14 P_14 C7_14 C12_14 -37.8(3) . . . . ?
Pt_11 P_14 C7_14 C12_14 -166.0(2) . . . . ?
C12_14 C7_14 C8_14 C9_14 0.5(6) . . . . ?
P_14 C7_14 C8_14 C9_14 176.9(3) . . . . ?
C7_14 C8_14 C9_14 C10_14 -0.5(6) . . . . ?
C8_14 C9_14 C10_14 FB_14 -179.2(4) . . . . ?
C8_14 C9_14 C10_14 C11_14 0.3(6) . . . . ?
FB_14 C10_14 C11_14 C12_14 179.4(3) . . . . ?
C9_14 C10_14 C11_14 C12_14 -0.1(6) . . . . ?
C10_14 C11_14 C12_14 C7_14 0.1(6) . . . . ?
C8_14 C7_14 C12_14 C11_14 -0.3(5) . . . . ?
P_14 C7_14 C12_14 C11_14 -176.7(3) . . . . ?
C7_14 P_14 C1_14 C2_14 171.2(3) . . . . ?
C13_14 P_14 C1_14 C2_14 -82.2(4) . . . . ?
Pt_11 P_14 C1_14 C2_14 42.6(4) . . . . ?
C7_14 P_14 C1_14 C6_14 -2.7(4) . . . . ?
C13_14 P_14 C1_14 C6_14 103.9(4) . . . . ?
Pt_11 P_14 C1_14 C6_14 -131.3(3) . . . . ?
C6_14 C1_14 C2_14 C3_14 -2.3(7) . . . . ?
P_14 C1_14 C2_14 C3_14 -176.3(3) . . . . ?
C1_14 C2_14 C3_14 C4_14 1.7(7) . . . . ?
C2_14 C3_14 C4_14 FA_14 179.0(4) . . . . ?
C2_14 C3_14 C4_14 C5_14 -0.9(7) . . . . ?
FA_14 C4_14 C5_14 C6_14 -179.3(4) . . . . ?
C3_14 C4_14 C5_14 C6_14 0.6(7) . . . . ?
C2_14 C1_14 C6_14 C5_14 1.9(7) . . . . ?
P_14 C1_14 C6_14 C5_14 175.8(4) . . . . ?
C4_14 C5_14 C6_14 C1_14 -1.1(7) . . . . ?
C3_22 C8_22 C7_22 C6_22 -0.6(7) . . . . ?
C8_22 C7_22 C6_22 C5_22 -0.9(7) . . . . ?
C8_22 C7_22 C6_22 C9_22 178.5(4) . . . . ?
C7_22 C6_22 C5_22 C4_22 1.0(6) . . . . ?
C9_22 C6_22 C5_22 C4_22 -178.4(4) . . . . ?
C6_22 C5_22 C4_22 C3_22 0.4(6) . . . . ?
C7_22 C8_22 C3_22 C4_22 2.1(6) . . . . ?
C7_22 C8_22 C3_22 S1_22 -175.2(3) . . . . ?
C5_22 C4_22 C3_22 C8_22 -1.9(6) . . . . ?
C5_22 C4_22 C3_22 S1_22 175.3(3) . . . . ?
C8_22 C3_22 S1_22 O1_22 140.6(3) . . . . ?
C4_22 C3_22 S1_22 O1_22 -36.7(4) . . . . ?
C8_22 C3_22 S1_22 O2_22 11.7(4) . . . . ?
C4_22 C3_22 S1_22 O2_22 -165.5(3) . . . . ?
C8_22 C3_22 S1_22 C1_22 -105.1(3) . . . . ?
C4_22 C3_22 S1_22 C1_22 77.6(3) . . . . ?
O1_22 S1_22 C1_22 C2_22 -160.6(3) . . . . ?
O2_22 S1_22 C1_22 C2_22 -30.4(3) . . . . ?
C3_22 S1_22 C1_22 C2_22 84.9(3) . . . . ?
O1_22 S1_22 C1_22 Pt_21 -81.2(2) . . . . ?
O2_22 S1_22 C1_22 Pt_21 49.0(2) . . . . ?
C3_22 S1_22 C1_22 Pt_21 164.30(18) . . . . ?
S1_22 C1_22 C2_22 S2_22 -135.6(2) . . . . ?
Pt_21 C1_22 C2_22 S2_22 113.6(3) . . . . ?
S1_22 C1_22 C2_22 Pt_21 110.8(2) . . . . ?
C1_22 C2_22 S2_22 O3_22 -37.4(3) . . . . ?
Pt_21 C2_22 S2_22 O3_22 44.6(3) . . . . ?
C1_22 C2_22 S2_22 O4_22 -168.6(3) . . . . ?
Pt_21 C2_22 S2_22 O4_22 -86.6(2) . . . . ?
C1_22 C2_22 S2_22 C10_22 77.8(3) . . . . ?
Pt_21 C2_22 S2_22 C10_22 159.8(2) . . . . ?
O3_22 S2_22 C10_22 C15_22 -155.5(4) . . . . ?
O4_22 S2_22 C10_22 C15_22 -26.0(4) . . . . ?
C2_22 S2_22 C10_22 C15_22 87.6(4) . . . . ?
O3_22 S2_22 C10_22 C11_22 28.2(4) . . . . ?
O4_22 S2_22 C10_22 C11_22 157.7(3) . . . . ?
C2_22 S2_22 C10_22 C11_22 -88.8(4) . . . . ?
C11_22 C10_22 C15_22 C14_22 -0.1(7) . . . . ?
S2_22 C10_22 C15_22 C14_22 -176.4(4) . . . . ?
C10_22 C15_22 C14_22 C13_22 -0.3(8) . . . . ?
C15_22 C14_22 C13_22 C12_22 0.3(8) . . . . ?
C15_22 C14_22 C13_22 C16_22 180.0(5) . . . . ?
C14_22 C13_22 C12_22 C11_22 0.2(8) . . . . ?
C16_22 C13_22 C12_22 C11_22 -179.6(5) . . . . ?
C13_22 C12_22 C11_22 C10_22 -0.5(7) . . . . ?
C15_22 C10_22 C11_22 C12_22 0.5(7) . . . . ?
S2_22 C10_22 C11_22 C12_22 176.8(4) . . . . ?
C1_23 C2_23 C3_23 C4_23 -0.8(6) . . . . ?
C7_23 C2_23 C3_23 C4_23 179.6(4) . . . . ?
C2_23 C3_23 C4_23 C5_23 0.3(6) . . . . ?
C3_23 C4_23 C5_23 C6_23 -0.2(7) . . . . ?
C4_23 C5_23 C6_23 C1_23 0.5(6) . . . . ?
C4_23 C5_23 C6_23 C8_23 -178.9(5) . . . . ?
C3_23 C2_23 C1_23 C6_23 1.1(6) . . . . ?
C7_23 C2_23 C1_23 C6_23 -179.3(4) . . . . ?
C3_23 C2_23 C1_23 N_23 -179.4(4) . . . . ?
C7_23 C2_23 C1_23 N_23 0.2(6) . . . . ?
C5_23 C6_23 C1_23 C2_23 -1.0(6) . . . . ?
C8_23 C6_23 C1_23 C2_23 178.4(5) . . . . ?
C5_23 C6_23 C1_23 N_23 179.6(4) . . . . ?
C8_23 C6_23 C1_23 N_23 -1.0(6) . . . . ?
C13_24 C18_24 C17_24 C16_24 -0.1(7) . . . . ?
C18_24 C17_24 C16_24 FC_24 -178.5(5) . . . . ?
C18_24 C17_24 C16_24 C15_24 0.8(8) . . . . ?
FC_24 C16_24 C15_24 C14_24 179.0(5) . . . . ?
C17_24 C16_24 C15_24 C14_24 -0.3(9) . . . . ?
C16_24 C15_24 C14_24 C13_24 -0.8(8) . . . . ?
C17_24 C18_24 C13_24 C14_24 -1.0(6) . . . . ?
C17_24 C18_24 C13_24 P_24 174.0(3) . . . . ?
C15_24 C14_24 C13_24 C18_24 1.4(7) . . . . ?
C15_24 C14_24 C13_24 P_24 -173.7(4) . . . . ?
C18_24 C13_24 P_24 C7_24 -91.2(4) . . . . ?
C14_24 C13_24 P_24 C7_24 83.8(3) . . . . ?
C18_24 C13_24 P_24 C1_24 17.8(4) . . . . ?
C14_24 C13_24 P_24 C1_24 -167.2(3) . . . . ?
C18_24 C13_24 P_24 Pt_21 136.0(3) . . . . ?
C14_24 C13_24 P_24 Pt_21 -49.0(4) . . . . ?
C1_24 P_24 C7_24 C8_24 105.5(3) . . . . ?
C13_24 P_24 C7_24 C8_24 -145.9(3) . . . . ?
Pt_21 P_24 C7_24 C8_24 -14.6(4) . . . . ?
C1_24 P_24 C7_24 C12_24 -71.2(4) . . . . ?
C13_24 P_24 C7_24 C12_24 37.4(4) . . . . ?
Pt_21 P_24 C7_24 C12_24 168.7(3) . . . . ?
C12_24 C7_24 C8_24 C9_24 -0.1(6) . . . . ?
P_24 C7_24 C8_24 C9_24 -176.8(3) . . . . ?
C7_24 C8_24 C9_24 C10_24 -0.8(6) . . . . ?
C8_24 C9_24 C10_24 FB_24 -178.2(4) . . . . ?
C8_24 C9_24 C10_24 C11_24 1.9(7) . . . . ?
FB_24 C10_24 C11_24 C12_24 178.2(4) . . . . ?
C9_24 C10_24 C11_24 C12_24 -2.0(7) . . . . ?
C10_24 C11_24 C12_24 C7_24 1.0(7) . . . . ?
C8_24 C7_24 C12_24 C11_24 0.0(7) . . . . ?
P_24 C7_24 C12_24 C11_24 176.7(4) . . . . ?
C7_24 P_24 C1_24 C6_24 -15.0(3) . . . . ?
C13_24 P_24 C1_24 C6_24 -121.8(3) . . . . ?
Pt_21 P_24 C1_24 C6_24 113.2(3) . . . . ?
C7_24 P_24 C1_24 C2_24 173.5(3) . . . . ?
C13_24 P_24 C1_24 C2_24 66.7(3) . . . . ?
Pt_21 P_24 C1_24 C2_24 -58.3(3) . . . . ?
C6_24 C1_24 C2_24 C3_24 0.4(6) . . . . ?
P_24 C1_24 C2_24 C3_24 172.1(3) . . . . ?
C1_24 C2_24 C3_24 C4_24 -0.7(6) . . . . ?
C2_24 C3_24 C4_24 FA_24 -178.5(4) . . . . ?
C2_24 C3_24 C4_24 C5_24 1.4(6) . . . . ?
FA_24 C4_24 C5_24 C6_24 178.3(3) . . . . ?
C3_24 C4_24 C5_24 C6_24 -1.6(6) . . . . ?
C2_24 C1_24 C6_24 C5_24 -0.6(5) . . . . ?
P_24 C1_24 C6_24 C5_24 -172.0(3) . . . . ?
C4_24 C5_24 C6_24 C1_24 1.1(5) . . . . ?
 
_refine_diff_density_max    1.900
_refine_diff_density_min   -2.404
_refine_diff_density_rms    0.131

_shelx_res_file
;
TITL X4ESxT-07Jun124231_a.res in P1
    XDS_ASCII_scaled12b_unmerged.res
    created by SHELXL-2019/3 at 09:14:21 on 20-Aug-2023

REM Old TITL X4ESxT-07Jun124231 in P1
REM SHELXT solution in P1: R1 0.119, Rweak 0.026, Alpha 0.000
REM <I/s>   0.000 for    0 systematic absences,  Orientation as input
REM Flack x =  0.167 ( 0.008 ) from 11649 Parsons' quotients
REM Formula found by SHELXT:  C109 N40 O15 S10 I2

CELL 0.62000  11.48800  14.20300  14.40450  62.2115  75.7150  74.3450
ZERR    2.00   0.00230   0.00284   0.00288   0.0300   0.0300   0.0300
LATT -1
SFAC  C  N  O  S  Pt  F  P  H
DISP    Pt   -0.84788    6.75574     24349.60
DISP    H     0.00000    0.00000         0.66
DISP    N     0.00416    0.00245        14.28
DISP    C     0.00201    0.00119         8.75
DISP    O     0.00771    0.00451        22.87
DISP    S     0.09937    0.09447       352.74
DISP    F     0.01289    0.00767        35.49
DISP    P     0.08091    0.07202       271.84
UNIT 86 2 8 4 2 6 2 74
L.S. 6
LIST 4
BOND $H
CONF
MERG 2
FMAP 2
rem PLAN   25
SHEL 180 0.62
ACTA
WPDB -2
TEMP -173.15
SIZE 0.05 0.02 0.02
rem HFIX_HPX  43 C3 C2 C5 C6 C8 C9
rem HFIX_HPX  43 C11 C12 C14 C15 C17 C18
rem HFIX_PNC 43  C3 C4 C5
rem HFIX_PNC 137 C8 C7
REM HFIX_TOE 43 C11 C12 C14 C15 C4 C8 C5 C7
REM HFIX_TOE 13 C1 C2
REM HFIX_TOE 137 C9 C16

PLAN 20
rem simu_* 0.01

twin

REM Omit extracted on Sun Aug 20 08:30:41 2023
omit 11 -9 7
omit 12 15 3
omit 13 18 8
omit 11 21 9
omit -13 -18 -8
omit 14 19 10
omit 13 -7 5
omit -12 -15 -3
omit -12 -18 -5
omit -13 -13 -2
omit -13 -20 -10
omit -12 -15 -2
omit 8 5 6
omit 0 -3 -3
omit 6 -12 10
omit 6 22 10
omit 12 16 4

REM Omit extracted on Sun Aug 20 08:36:55 2023
omit -1 -4 -2

REM Omit extracted on Sun Aug 20 08:43:40 2023
omit -1 -3 17

REM Omit extracted on Sun Aug 20 08:49:52 2023

REM Omit extracted on Sun Aug 20 08:55:47 2023

REM Omit extracted on Sun Aug 20 09:02:17 2023

REM Omit extracted on Sun Aug 20 09:08:46 2023

WGHT    0.026000
BASF   0.29910
FVAR       0.25894
RESI 11 Pt
PT    5    0.405417    0.719337    0.140015    11.00000    0.01755    0.01159 =
         0.01181   -0.00403   -0.00013   -0.00256

RESI  12 TOE
C8    1    0.524391    0.297597    0.429032    11.00000    0.01872    0.02121 =
         0.02132   -0.00672   -0.00297   -0.00341
AFIX  43
H8    8    0.600989    0.319997    0.396924    11.00000   -1.20000
AFIX   0
C7    1    0.517008    0.188799    0.475041    11.00000    0.02404    0.01829 =
         0.02533   -0.00396   -0.00709   -0.00137
AFIX  43
H7    8    0.589033    0.136951    0.473992    11.00000   -1.20000
AFIX   0
C6    1    0.405670    0.154384    0.522746    11.00000    0.02968    0.01609 =
         0.02552   -0.00242   -0.00493   -0.00372
C9    1    0.397086    0.036186    0.574125    11.00000    0.04178    0.01666 =
         0.04223   -0.00331   -0.00324   -0.00785
AFIX 137
H9A   8    0.476573   -0.006033    0.560128    11.00000   -1.50000
H9B   8    0.335677    0.025642    0.544863    11.00000   -1.50000
H9C   8    0.373427    0.012075    0.650799    11.00000   -1.50000
AFIX   0
C5    1    0.299330    0.232647    0.521130    11.00000    0.02087    0.02105 =
         0.02813   -0.00362    0.00066   -0.00749
AFIX  43
H5    8    0.222511    0.210368    0.551992    11.00000   -1.20000
AFIX   0
C4    1    0.305342    0.341934    0.475009    11.00000    0.01882    0.02151 =
         0.01988   -0.00506   -0.00044   -0.00427
AFIX  43
H4    8    0.233276    0.394325    0.473945    11.00000   -1.20000
AFIX   0
C3    1    0.419065    0.373792    0.430122    11.00000    0.02189    0.01566 =
         0.01328   -0.00276   -0.00268   -0.00396
S1    4    0.427634    0.511691    0.373967    11.00000    0.02109    0.01620 =
         0.01230   -0.00422   -0.00171   -0.00502
O1    3    0.341348    0.558910    0.439263    11.00000    0.03201    0.02035 =
         0.01525   -0.00813    0.00059   -0.00603
O2    3    0.555321    0.518233    0.356801    11.00000    0.02287    0.02557 =
         0.02043   -0.00526   -0.00345   -0.01007
C1    1    0.375446    0.566458    0.252002    11.00000    0.02260    0.01415 =
         0.01178   -0.00391   -0.00246   -0.00094
AFIX  13
H1    8    0.292962    0.552279    0.256924    11.00000   -1.20000
AFIX   0
C2    1    0.461646    0.559378    0.161069    11.00000    0.02360    0.01272 =
         0.01377   -0.00626   -0.00049   -0.00334
AFIX  13
H2    8    0.547629    0.528767    0.176421    11.00000   -1.20000
AFIX   0
S2    4    0.420628    0.513741    0.082553    11.00000    0.02407    0.01497 =
         0.01409   -0.00638   -0.00216   -0.00246
O4    3    0.500015    0.546704   -0.017650    11.00000    0.04296    0.02680 =
         0.01692   -0.01173    0.00335   -0.00979
O3    3    0.290965    0.543248    0.082529    11.00000    0.02642    0.02092 =
         0.02829   -0.01066   -0.01110    0.00325
C10   1    0.457512    0.371016    0.148727    11.00000    0.02381    0.01698 =
         0.02076   -0.00988   -0.00549   -0.00057
C15   1    0.577633    0.320620    0.131542    11.00000    0.02449    0.02161 =
         0.03392   -0.01499   -0.00189   -0.00061
AFIX  43
H15   8    0.637239    0.361626    0.082180    11.00000   -1.20000
AFIX   0
C14   1    0.608587    0.209011    0.188120    11.00000    0.03542    0.02285 =
         0.04425   -0.01838   -0.01336    0.00706
AFIX  43
H14   8    0.690670    0.174263    0.177900    11.00000   -1.20000
AFIX   0
C13   1    0.523989    0.148330    0.257851    11.00000    0.04559    0.01598 =
         0.03408   -0.00994   -0.02035    0.00089
C16   1    0.560751    0.027683    0.321643    11.00000    0.06977    0.01781 =
         0.05028   -0.01062   -0.02968    0.00200
AFIX 137
H16A  8    0.620845   -0.002976    0.276955    11.00000   -1.50000
H16B  8    0.488548   -0.006503    0.346626    11.00000   -1.50000
H16C  8    0.596658    0.014427    0.382644    11.00000   -1.50000
AFIX   0
C12   1    0.402564    0.199818    0.272947    11.00000    0.04225    0.01895 =
         0.02716   -0.00407   -0.00979   -0.00902
AFIX  43
H12   8    0.342318    0.158394    0.320225    11.00000   -1.20000
AFIX   0
C11   1    0.370746    0.311793    0.218392    11.00000    0.02802    0.02098 =
         0.02565   -0.00810   -0.00836   -0.00222
AFIX  43
H11   8    0.289107    0.347000    0.229459    11.00000   -1.20000
AFIX   0

RESI 13 PNC
C7    1    0.617856    0.734847   -0.202099    11.00000    0.04560    0.03387 =
         0.03364   -0.01505    0.00758   -0.00994
AFIX 137
H7A   8    0.530001    0.736787   -0.193239    11.00000   -1.50000
H7B   8    0.647742    0.689244   -0.133682    11.00000   -1.50000
H7C   8    0.660774    0.704971   -0.253037    11.00000   -1.50000
AFIX   0
C2    1    0.641021    0.848037   -0.242636    11.00000    0.02541    0.02862 =
         0.01850   -0.00517    0.00078   -0.00066
C3    1    0.713941    0.895719   -0.339023    11.00000    0.02667    0.03735 =
         0.01987   -0.00700    0.00569   -0.00045
AFIX  43
H3    8    0.749556    0.856565   -0.380616    11.00000   -1.20000
AFIX   0
C4    1    0.735126    0.999495   -0.374924    11.00000    0.02378    0.03869 =
         0.01797    0.00156    0.00178   -0.00420
AFIX  43
H4    8    0.787553    1.029649   -0.439489    11.00000   -1.20000
AFIX   0
C5    1    0.681436    1.058852   -0.318467    11.00000    0.02269    0.03125 =
         0.02507    0.00176   -0.00026   -0.00865
AFIX  43
H5    8    0.695281    1.130599   -0.345432    11.00000   -1.20000
AFIX   0
C6    1    0.606484    1.016032   -0.221742    11.00000    0.02258    0.02793 =
         0.02100   -0.00189    0.00024   -0.00568
C8    1    0.544832    1.081000   -0.159295    11.00000    0.03925    0.03509 =
         0.04228   -0.01750    0.00835   -0.01536
AFIX 137
H8A   8    0.562853    1.154467   -0.198955    11.00000   -1.50000
H8B   8    0.575169    1.046512   -0.090857    11.00000   -1.50000
H8C   8    0.456365    1.084290   -0.147447    11.00000   -1.50000
AFIX   0
C1    1    0.590276    0.910078   -0.186010    11.00000    0.01820    0.02455 =
         0.01619   -0.00172    0.00139   -0.00517
N     2    0.521954    0.862636   -0.086223    11.00000    0.02131    0.02836 =
         0.01817   -0.00701   -0.00176   -0.00335
C     1    0.476273    0.813025   -0.000040    11.00000    0.02173    0.01868 =
         0.01466   -0.00340    0.00217    0.00098

RESI  14 HPX
FA    6    0.614021    0.717459    0.553901    11.00000    0.04170    0.03922 =
         0.02727   -0.00490   -0.01907   -0.01028
FB    6   -0.187869    0.851312    0.430106    11.00000    0.01798    0.02849 =
         0.03157   -0.01436    0.00585   -0.00650
FC    6    0.322583    1.298931   -0.092162    11.00000    0.04713    0.01513 =
         0.03629    0.00076    0.00478   -0.00724
C18   1    0.408075    1.038528    0.121825    11.00000    0.03297    0.01838 =
         0.02295   -0.00537   -0.00500   -0.00981
AFIX  43
H18   8    0.466617    1.003364    0.169630    11.00000   -1.20000
AFIX   0
C17   1    0.407234    1.146941    0.048819    11.00000    0.03935    0.01948 =
         0.03027   -0.00668   -0.00202   -0.01505
AFIX  43
H17   8    0.463827    1.185940    0.046993    11.00000   -1.20000
AFIX   0
C16   1    0.322750    1.195040   -0.019696    11.00000    0.03754    0.01409 =
         0.02382   -0.00395    0.00325   -0.00375
C15   1    0.236602    1.143139   -0.017368    11.00000    0.02407    0.01773 =
         0.02295   -0.00200   -0.00254   -0.00036
AFIX  43
H15   8    0.177454    1.179714   -0.064597    11.00000   -1.20000
AFIX   0
C14   1    0.237709    1.036017    0.055488    11.00000    0.02685    0.01738 =
         0.02081   -0.00694   -0.00355   -0.00338
AFIX  43
H14   8    0.178666    0.998832    0.058110    11.00000   -1.20000
AFIX   0
C13   1    0.324851    0.981926    0.125303    11.00000    0.02013    0.01441 =
         0.01724   -0.00581    0.00066   -0.00587
P     7    0.322283    0.839585    0.214696    11.00000    0.01816    0.01253 =
         0.01449   -0.00547   -0.00068   -0.00377
C7    1    0.163699    0.845122    0.276152    11.00000    0.01791    0.01371 =
         0.01623   -0.00692    0.00003   -0.00328
C8    1    0.103390    0.760406    0.304330    11.00000    0.02126    0.01422 =
         0.02315   -0.00878   -0.00116   -0.00424
AFIX  43
H8    8    0.144254    0.700968    0.288179    11.00000   -1.20000
AFIX   0
C9    1   -0.015517    0.762477    0.355628    11.00000    0.02225    0.01667 =
         0.02809   -0.00995    0.00033   -0.00663
AFIX  43
H9    8   -0.057382    0.705404    0.374532    11.00000   -1.20000
AFIX   0
C10   1   -0.071709    0.849593    0.378614    11.00000    0.01732    0.01934 =
         0.01774   -0.00695    0.00115   -0.00422
C11   1   -0.016097    0.934682    0.352861    11.00000    0.02157    0.01834 =
         0.02138   -0.01070    0.00072   -0.00350
AFIX  43
H11   8   -0.057709    0.993437    0.369871    11.00000   -1.20000
AFIX   0
C12   1    0.103149    0.931681    0.301064    11.00000    0.02233    0.01738 =
         0.01960   -0.00935    0.00141   -0.00632
AFIX  43
H12   8    0.144086    0.989286    0.282324    11.00000   -1.20000
AFIX   0
C1    1    0.409222    0.809280    0.318534    11.00000    0.02425    0.01398 =
         0.01525   -0.00494   -0.00336   -0.00556
C2    1    0.535577    0.785182    0.299495    11.00000    0.02093    0.02185 =
         0.02297   -0.01136   -0.00236    0.00022
AFIX  43
H2    8    0.574527    0.789008    0.231796    11.00000   -1.20000
AFIX   0
C3    1    0.606317    0.755482    0.377882    11.00000    0.02461    0.02248 =
         0.03140   -0.01445   -0.00847    0.00198
AFIX  43
H3    8    0.692950    0.740928    0.364005    11.00000   -1.20000
AFIX   0
C4    1    0.547331    0.747785    0.475995    11.00000    0.03336    0.02300 =
         0.02195   -0.00312   -0.01247   -0.00663
C5    1    0.421627    0.769739    0.498777    11.00000    0.03678    0.04647 =
         0.01744   -0.01034   -0.00090   -0.01844
AFIX  43
H5    8    0.383425    0.764422    0.567107    11.00000   -1.20000
AFIX   0
C6    1    0.352028    0.799902    0.419152    11.00000    0.02337    0.04349 =
         0.01696   -0.01234    0.00296   -0.01320
AFIX  43
H6    8    0.265416    0.814098    0.433501    11.00000   -1.20000
AFIX   0

rem same 0.01 pt_11 > c6_14
RESI 21 Pt
PT    5   -0.067017    0.256461    0.566575    11.00000    0.01860    0.00979 =
         0.01152   -0.00392   -0.00159   -0.00120

RESI 22 TOE
C8    1    0.011532    0.593085    0.171836    11.00000    0.01737    0.02471 =
         0.02122   -0.00650   -0.00232   -0.00310
AFIX  43
H8    8    0.089933    0.559630    0.193352    11.00000   -1.20000
AFIX   0
C7    1    0.000162    0.657297    0.065938    11.00000    0.02072    0.02731 =
         0.01713   -0.00278    0.00132   -0.00496
AFIX  43
H7    8    0.071511    0.668301    0.014816    11.00000   -1.20000
AFIX   0
C6    1   -0.114147    0.706100    0.032991    11.00000    0.02414    0.02062 =
         0.01712   -0.00410   -0.00361   -0.00269
C9    1   -0.124132    0.778072   -0.082775    11.00000    0.03965    0.03501 =
         0.01661   -0.00301   -0.00542   -0.00169
AFIX 137
H9A   8   -0.156636    0.852892   -0.092602    11.00000   -1.50000
H9B   8   -0.179103    0.753780   -0.106063    11.00000   -1.50000
H9C   8   -0.043139    0.774251   -0.124786    11.00000   -1.50000
AFIX   0
C5    1   -0.217876    0.687811    0.108882    11.00000    0.02226    0.02344 =
         0.01793   -0.00545   -0.00551    0.00115
AFIX  43
H5    8   -0.296338    0.719738    0.087139    11.00000   -1.20000
AFIX   0
C4    1   -0.208733    0.623778    0.215730    11.00000    0.01641    0.02123 =
         0.01825   -0.00653   -0.00010   -0.00306
AFIX  43
H4    8   -0.279952    0.611400    0.266878    11.00000   -1.20000
AFIX   0
C3    1   -0.092963    0.578095    0.246321    11.00000    0.02018    0.01304 =
         0.01340   -0.00374   -0.00239   -0.00192
S1    4   -0.079809    0.504854    0.382958    11.00000    0.01945    0.01060 =
         0.01433   -0.00363   -0.00398   -0.00168
O1    3   -0.173323    0.559018    0.437899    11.00000    0.02746    0.01409 =
         0.01715   -0.00705   -0.00195   -0.00134
O2    3    0.046578    0.491244    0.393047    11.00000    0.02199    0.01822 =
         0.02278   -0.00566   -0.00841   -0.00165
C1    1   -0.115992    0.378331    0.422694    11.00000    0.02068    0.01137 =
         0.01354   -0.00290    0.00048   -0.00456
AFIX  13
H1    8   -0.197205    0.380130    0.407633    11.00000   -1.20000
AFIX   0
C2    1   -0.017024    0.295746    0.405832    11.00000    0.02158    0.01337 =
         0.01385   -0.00639    0.00124   -0.00312
AFIX  13
H2    8    0.063687    0.319956    0.376254    11.00000   -1.20000
AFIX   0
S2    4   -0.043465    0.215648    0.353460    11.00000    0.03364    0.01341 =
         0.01421   -0.00614   -0.00095   -0.00604
O4    3    0.060176    0.128662    0.365720    11.00000    0.04927    0.01504 =
         0.02423   -0.01071   -0.00539    0.00200
O3    3   -0.163577    0.190205    0.394416    11.00000    0.04089    0.02767 =
         0.01762   -0.00886    0.00508   -0.01972
C10   1   -0.039849    0.300962    0.216586    11.00000    0.03148    0.01757 =
         0.01416   -0.00665    0.00043   -0.00749
C15   1    0.070726    0.304691    0.150492    11.00000    0.04027    0.02531 =
         0.02537   -0.01109    0.00633   -0.00403
AFIX  43
H15   8    0.143446    0.258915    0.177395    11.00000   -1.20000
AFIX   0
C14   1    0.073311    0.377212    0.043259    11.00000    0.05820    0.02871 =
         0.02126   -0.00915    0.01262   -0.00742
AFIX  43
H14   8    0.148767    0.380700   -0.002780    11.00000   -1.20000
AFIX   0
C13   1   -0.032365    0.444088    0.003014    11.00000    0.06492    0.02492 =
         0.01424   -0.00810    0.00061   -0.01429
C16   1   -0.027586    0.521821   -0.113008    11.00000    0.09401    0.03370 =
         0.01593   -0.00512   -0.00166   -0.01646
AFIX 137
H16A  8    0.010870    0.581794   -0.127004    11.00000   -1.50000
H16B  8   -0.110711    0.550206   -0.131208    11.00000   -1.50000
H16C  8    0.020183    0.483891   -0.156081    11.00000   -1.50000
AFIX   0
C12   1   -0.141982    0.439118    0.070331    11.00000    0.04378    0.03023 =
         0.02226   -0.00516   -0.00679   -0.01289
AFIX  43
H12   8   -0.214564    0.484687    0.042976    11.00000   -1.20000
AFIX   0
C11   1   -0.147629    0.368275    0.177714    11.00000    0.03406    0.03221 =
         0.02064   -0.00735   -0.00440   -0.01125
AFIX  43
H11   8   -0.223097    0.365672    0.223670    11.00000   -1.20000
AFIX   0

RESI  23 PNC
C7    1    0.070441   -0.109030    0.598795    11.00000    0.03577    0.02597 =
         0.02614   -0.01296   -0.01572    0.00725
AFIX 137
H7A   8    0.068814   -0.170659    0.586062    11.00000   -1.50000
H7B   8    0.113926   -0.057390    0.536113    11.00000   -1.50000
H7C   8   -0.013379   -0.073462    0.612913    11.00000   -1.50000
AFIX   0
C2    1    0.134846   -0.148289    0.692877    11.00000    0.01946    0.01588 =
         0.01702   -0.00548   -0.00237   -0.00060
C3    1    0.197573   -0.254163    0.739303    11.00000    0.02599    0.01420 =
         0.01884   -0.00625   -0.00369    0.00043
AFIX  43
H3    8    0.199817   -0.303641    0.711496    11.00000   -1.20000
AFIX   0
C4    1    0.256819   -0.288086    0.825773    11.00000    0.02770    0.01429 =
         0.01993   -0.00408   -0.00725    0.00356
AFIX  43
H4    8    0.299566   -0.360390    0.856320    11.00000   -1.20000
AFIX   0
C5    1    0.254087   -0.217200    0.867938    11.00000    0.02927    0.02021 =
         0.01843   -0.00639   -0.00641    0.00133
AFIX  43
H5    8    0.294847   -0.241617    0.927230    11.00000   -1.20000
AFIX   0
C6    1    0.192354   -0.110771    0.824405    11.00000    0.02773    0.01733 =
         0.02001   -0.00811   -0.00686    0.00178
C8    1    0.190076   -0.032419    0.867565    11.00000    0.04533    0.03476 =
         0.04135   -0.02579   -0.01985    0.00557
AFIX 137
H8A   8    0.240676   -0.067309    0.924664    11.00000   -1.50000
H8B   8    0.105889   -0.009793    0.895397    11.00000   -1.50000
H8C   8    0.222172    0.031071    0.810850    11.00000   -1.50000
AFIX   0
C1    1    0.133655   -0.080201    0.738023    11.00000    0.02082    0.01155 =
         0.01836   -0.00446   -0.00408    0.00009
N     2    0.070195    0.025947    0.693050    11.00000    0.02469    0.01459 =
         0.02177   -0.00754   -0.00238   -0.00038
C     1    0.017005    0.112188    0.648934    11.00000    0.02156    0.01444 =
         0.01580   -0.00476   -0.00258   -0.00326

RESI 24 HPX
FA    6    0.142044    0.647873    0.585667    11.00000    0.04797    0.03446 =
         0.03180   -0.01698    0.00499   -0.02611
FB    6   -0.661938    0.522517    0.741581    11.00000    0.01996    0.03040 =
         0.03467   -0.01850   -0.00545    0.00597
FC    6   -0.126702   -0.014554    1.145080    11.00000    0.08327    0.05238 =
         0.01723    0.00895   -0.01447   -0.01873
C18   1   -0.090945    0.231995    0.907745    11.00000    0.02168    0.03131 =
         0.01793   -0.00952   -0.00200   -0.00518
AFIX  43
H18   8   -0.067089    0.299229    0.885541    11.00000   -1.20000
AFIX   0
C17   1   -0.089717    0.155346    1.013307    11.00000    0.03508    0.04304 =
         0.01654   -0.00868   -0.00853   -0.00643
AFIX  43
H17   8   -0.065192    0.169553    1.063202    11.00000   -1.20000
AFIX   0
C16   1   -0.124666    0.059617    1.042765    11.00000    0.04397    0.03719 =
         0.01415    0.00108   -0.00783   -0.00584
C15   1   -0.160025    0.033797    0.973285    11.00000    0.04396    0.02871 =
         0.02102    0.00071   -0.00387   -0.01066
AFIX  43
H15   8   -0.183419   -0.033871    0.996620    11.00000   -1.20000
AFIX   0
C14   1   -0.160090    0.110592    0.867882    11.00000    0.03142    0.02141 =
         0.01625   -0.00289   -0.00174   -0.00528
AFIX  43
H14   8   -0.182849    0.094833    0.818254    11.00000   -1.20000
AFIX   0
C13   1   -0.126890    0.210654    0.834690    11.00000    0.02157    0.01882 =
         0.01282   -0.00377   -0.00388   -0.00078
P     7   -0.144680    0.311575    0.699281    11.00000    0.01771    0.01332 =
         0.01158   -0.00500   -0.00184   -0.00151
C7    1   -0.304609    0.373224    0.713507    11.00000    0.01765    0.01720 =
         0.01551   -0.00792   -0.00099   -0.00136
C8    1   -0.373122    0.409527    0.631905    11.00000    0.01948    0.02343 =
         0.01565   -0.00868   -0.00306   -0.00015
AFIX  43
H8    8   -0.337017    0.398647    0.569998    11.00000   -1.20000
AFIX   0
C9    1   -0.493860    0.461536    0.640254    11.00000    0.02063    0.02679 =
         0.02005   -0.00910   -0.00553    0.00035
AFIX  43
H9    8   -0.540649    0.487283    0.584421    11.00000   -1.20000
AFIX   0
C10   1   -0.543636    0.474693    0.731216    11.00000    0.01784    0.01755 =
         0.02501   -0.01064   -0.00309    0.00120
C11   1   -0.479030    0.441722    0.813590    11.00000    0.02172    0.03466 =
         0.02563   -0.02089   -0.00376    0.00190
AFIX  43
H11   8   -0.515632    0.454106    0.874624    11.00000   -1.20000
AFIX   0
C12   1   -0.359029    0.389990    0.803929    11.00000    0.02206    0.03694 =
         0.01981   -0.01785   -0.00504    0.00303
AFIX  43
H12   8   -0.312750    0.365398    0.859860    11.00000   -1.20000
AFIX   0
C1    1   -0.061244    0.414142    0.676858    11.00000    0.02298    0.01369 =
         0.01283   -0.00445   -0.00404   -0.00401
C2    1    0.065332    0.387268    0.673480    11.00000    0.01967    0.02291 =
         0.02578   -0.01407    0.00078   -0.00400
AFIX  43
H2    8    0.104517    0.314116    0.691747    11.00000   -1.20000
AFIX   0
C3    1    0.134830    0.465070    0.644053    11.00000    0.02567    0.03123 =
         0.02680   -0.01697    0.00228   -0.01118
AFIX  43
H3    8    0.220930    0.446484    0.642599    11.00000   -1.20000
AFIX   0
C4    1    0.075379    0.569843    0.617068    11.00000    0.03622    0.02640 =
         0.01700   -0.01054    0.00405   -0.01842
C5    1   -0.048619    0.600778    0.619865    11.00000    0.03906    0.01740 =
         0.01754   -0.00575   -0.00486   -0.00675
AFIX  43
H5    8   -0.086321    0.674182    0.602172    11.00000   -1.20000
AFIX   0
C6    1   -0.118706    0.521593    0.649454    11.00000    0.02599    0.01719 =
         0.01749   -0.00716   -0.00570   -0.00184
AFIX  43
H6    8   -0.204778    0.541049    0.650815    11.00000   -1.20000

AFIX   0
HKLF 4


REM  X4ESxT-07Jun124231_a.res in P1
REM wR2 = 0.0628, GooF = S = 1.109, Restrained GooF = 1.109 for all data
REM R1 = 0.0277 for 29616 Fo > 4sig(Fo) and 0.0301 for all 31365 data
REM 1000 parameters refined using 3 restraints

END

WGHT      0.0260      0.0000

REM Highest difference peak  1.900,  deepest hole -2.404,  1-sigma level  0.131
Q1    1   0.4131  0.6994  0.1074  11.00000  0.05    1.90
Q2    1  -0.0833  0.3025  0.5470  11.00000  0.05    1.67
Q3    1   0.4238  0.6726  0.1632  11.00000  0.05    1.61
Q4    1  -0.0773  0.2761  0.5974  11.00000  0.05    1.52
Q5    1   0.4779  0.6701  0.1087  11.00000  0.05    1.36
Q6    1   0.3350  0.7711  0.1712  11.00000  0.05    1.34
Q7    1  -0.0013  0.2020  0.5446  11.00000  0.05    1.32
Q8    1   0.4245  0.7666  0.0611  11.00000  0.05    1.32
Q9    1  -0.1018  0.2111  0.5423  11.00000  0.05    1.32
Q10   1  -0.1356  0.3122  0.5937  11.00000  0.05    1.26
Q11   1  -0.0870  0.2118  0.6490  11.00000  0.05    1.23
Q12   1  -0.0651  0.2404  0.5390  11.00000  0.05    1.19
Q13   1   0.4407  0.7723  0.1636  11.00000  0.05    1.17
Q14   1  -0.0327  0.2994  0.5991  11.00000  0.05    1.13
Q15   1  -0.1303  0.2509  0.5821  11.00000  0.05    1.13
Q16   1  -0.0281  0.3206  0.5486  11.00000  0.05    1.10
Q17   1   0.3643  0.6938  0.2206  11.00000  0.05    1.09
Q18   1  -0.1055  0.1902  0.5873  11.00000  0.05    1.07
Q19   1   0.4526  0.6919  0.2010  11.00000  0.05    1.06
Q20   1  -0.0194  0.2773  0.4901  11.00000  0.05    1.05
;
_shelx_res_checksum   45970

_shelx_hkl_file
;
  17   5  -1   57.30   10.10
 -17  -4   1    7.00    8.80
  17   4  -1    8.50    4.90
  17   4  -1    6.50    2.10
  17   4  -1    5.00    1.80
 -17  -3   1   63.20   14.10
  17   3  -1   57.50    9.80
  17   3  -1   55.00    3.30
  17   3  -1   57.60    3.70
 -17  -3   2   47.00   12.80
  17   3  -2   36.50    8.10
 -17  -2   1   18.60    9.80
  17   2  -1   18.10    5.90
  17   2  -1   28.10    2.80
  17   2  -1   21.50    2.50
 -17  -2   2   35.60   11.70
  17   2  -2   41.10    8.20
  17   2  -2   29.20    2.70
  17   2  -2   37.90    3.30
 -17  -1   1   73.30   15.20
 -17  -1   1   78.00    4.80
  17   1  -1   76.30   12.00
 -17  -1   2    8.40    8.50
  17   1  -2    5.80    4.30
  17   1  -2    3.60    1.80
  17   1  -2    6.10    1.90
 -17   0   1   -6.60    7.20
 -17   0   1    0.10    1.60
  17   0  -1    1.90    3.70
  17   0  -1   -0.40    1.30
  17   0  -1    1.20    1.40
 -17   0   2   24.70    8.70
 -17   0   2   37.10    3.90
  17   0  -2   37.00    7.90
  17   0  -2   26.10    2.70
  17   0  -2   28.10    2.90
 -17   1   1   14.20    8.10
 -17   1   1   23.00    3.00
  17  -1  -1   19.90    6.10
  17  -1  -1   18.70    2.30
  17  -1  -1   21.30    2.60
 -17   1   2   -1.80    5.70
  17  -1  -2    0.40    4.00
  17  -1  -2    0.10    1.40
 -17   2   1    2.20    6.00
  17  -2  -1    1.60    3.40
  17  -2  -1    0.10    1.20
  17  -2  -1    1.40    1.40
 -17   2   2   22.00    8.10
 -17   2   2   42.70    4.20
  17  -2  -2   48.90    3.20
  17  -2  -2   43.70    3.60
  17  -2  -3    4.40    1.90
 -17   3   1   33.90    8.60
  17  -3  -1   72.50   11.40
  17  -3  -1   70.30    4.10
  17  -3  -1   76.00    4.60
 -17   3   2    2.20    4.60
 -17   3   2    3.70    2.00
  17  -3  -2    1.00    4.20
  17  -3  -2   -0.60    1.40
  17  -3  -2    4.10    1.70
 -17   3   3   24.30    3.70
  17  -3  -3   18.90    2.60
  17  -3  -3   29.20    3.30
 -17   4   1    1.70    4.50
 -17   4   1    7.30    2.10
  17  -4  -1    2.20    3.70
  17  -4  -1    6.60    1.80
 -17   4   2   83.00    5.30
  17  -4  -2   97.50    4.70
  16   9  -1   66.50   12.00
  16   8  -1   20.30    5.90
  16   7  -1   41.10    7.90
  16   7  -2   27.90    6.80
 -16  -6   1   78.20    5.50
  16   6  -1   70.20   10.60
  16   6  -1   62.90   12.00
  16   6  -1   48.70    2.90
  16   6  -1   54.30    2.50
  16   6  -2   36.00    7.70
  16   6  -3   30.70    7.90
 -16  -5   1   44.80    3.60
 -16  -5   1   39.50    3.70
  16   5  -1   41.60    7.90
  16   5  -1   32.30    8.70
 -16  -5   2   48.70   11.90
  16   5  -2   46.10    8.30
  16   5  -2   31.60    2.50
  16   5  -2   26.30    1.90
 -16  -5   3   42.20   11.10
 -16  -4   1   87.80   18.90
 -16  -4   1  115.90    5.80
 -16  -4   1   95.90    5.30
  16   4  -1   91.20   13.70
  16   4  -1   90.80    4.00
 -16  -4   2   29.50   10.50
 -16  -4   2   43.60    4.50
 -16  -4   2   40.90    3.90
  16   4  -2   36.10    7.50
  16   4  -2   30.40    8.60
  16   4  -2   25.60    2.20
  16   4  -2   30.40    2.30
 -16  -4   3   17.20    8.90
  16   4  -3   12.00    5.00
 -16  -3   1    3.60    9.30
 -16  -3   1    8.00    2.00
  16   3  -1    5.90    3.80
  16   3  -1   10.00    5.70
  16   3  -1    3.80    1.40
 -16  -3   2   57.00   13.10
  16   3  -2   55.30    9.20
  16   3  -2   51.60    9.70
  16   3  -2   50.40    3.10
  16   3  -2   53.60    3.20
 -16  -3   3   58.20   13.30
  16   3  -3   83.10   11.60
  16   3  -3   53.00    2.90
  16   3  -3   56.10    3.20
 -16  -3   4   -1.60    6.50
  16   3  -4    0.40    3.30
 -16  -2   1   84.10   16.50
 -16  -2   1   67.60    4.20
  16   2  -1   57.80    9.30
  16   2  -1   68.70   10.80
  16   2  -1   52.10    2.90
  16   2  -1   57.20    3.50
 -16  -2   2   13.60    9.50
 -16  -2   2   20.80    3.10
  16   2  -2   17.70    5.10
  16   2  -2   20.40    6.50
  16   2  -2   19.10    2.10
  16   2  -2   20.50    2.20
 -16  -2   3   40.70   10.80
 -16  -2   3   54.60    5.70
  16   2  -3   41.10    7.80
  16   2  -3   38.10    2.70
  16   2  -3   41.20    3.10
 -16  -2   4   86.00   14.60
  16   2  -4   90.40   12.20
  16   2  -4   68.00    3.90
  16   2  -4   72.70    4.10
 -16  -1   1    9.20    9.30
  16   1  -1   14.90    4.80
  16   1  -1   11.90    5.60
  16   1  -1   18.30    2.20
 -16  -1   2   58.90    4.30
  16   1  -2   51.10    9.10
 -16  -1   3   25.30    9.70
 -16  -1   3   38.00    4.50
  16   1  -3   29.40    6.40
  16   1  -3   18.40    2.00
  16   1  -3   27.40    2.70
 -16  -1   4   19.90    8.30
  16   1  -4   24.80    6.20
  16   1  -4   27.80    2.70
 -16   0   1  141.60   21.60
 -16   0   1  163.30    6.90
  16   0  -1  156.00   18.40
  16   0  -1  168.20   18.80
  16   0  -1  139.80    5.00
 -16   0   2   23.00    3.00
  16   0  -2   19.80    6.20
  16   0  -2   19.50    2.10
  16   0  -2   19.10    2.30
 -16   0   3   26.80   10.00
  16   0  -3   23.60    5.80
  16   0  -3   27.90    2.80
 -16   0   4   16.70    8.10
 -16   0   4   19.50    4.80
  16   0  -4   11.30    4.60
  16   0  -4    5.40    1.70
  16   0  -4   12.80    2.20
 -16   1   1    4.00    7.30
 -16   1   1    7.90    2.20
  16  -1  -1    6.20    3.80
  16  -1  -1   10.30    5.00
  16  -1  -1    5.00    1.40
  16  -1  -1   11.90    2.00
 -16   1   2  107.10    5.80
  16  -1  -2   79.80   11.00
 -16   1   3    5.10    7.90
 -16   1   3   11.10    3.20
  16  -1  -3    8.40    4.40
  16  -1  -3    3.80    1.50
 -16   1   4   24.80    9.20
 -16   1   4   26.90    4.90
  16  -1  -4   33.80    7.30
  16  -1  -4   35.40    2.80
  16  -1  -4   38.60    3.20
 -16   2   1   56.80   13.10
  16  -2  -1   60.80   10.00
  16  -2  -1   52.60    7.90
  16  -2  -1   53.40    3.30
  16  -2  -1   57.90    3.80
 -16   2   2    3.70    1.90
  16  -2  -2    1.40    3.50
  16  -2  -2    1.00    1.20
  16  -2  -2    3.40    1.50
 -16   2   3   51.70   12.70
 -16   2   3   76.90    5.60
  16  -2  -3   71.70   10.60
  16  -2  -3   48.30    3.00
  16  -2  -3   64.30    4.00
 -16   2   4   50.30   12.20
 -16   2   4   63.70    6.30
  16  -2  -4   54.00    9.10
  16  -2  -4   41.60    2.90
  16  -2  -4   50.30    3.50
  16  -2  -5   29.50    2.90
  16  -2  -5   30.50    2.80
 -16   3   1   13.90    8.40
 -16   3   1   20.90    2.80
  16  -3  -1    8.20    1.50
  16  -3  -1   11.90    2.00
 -16   3   2   58.30    4.50
  16  -3  -2   53.60    9.30
  16  -3  -2   54.90    7.80
  16  -3  -2   59.40    3.40
 -16   3   3    3.30    7.50
 -16   3   3    7.30    2.60
  16  -3  -3    4.50    4.10
  16  -3  -3    2.40    1.50
  16  -3  -3    5.30    1.70
 -16   3   4  122.10   17.80
  16  -3  -4  120.10   15.70
  16  -3  -4   93.70    4.60
  16  -3  -4  117.80    5.50
 -16   3   5   69.60    8.50
  16  -3  -5   51.40    3.50
 -16   4   1   51.30   12.90
 -16   4   1   77.40    4.90
  16  -4  -1   59.00   10.40
  16  -4  -1   61.40    7.90
  16  -4  -1   49.70    3.00
  16  -4  -1   64.20    3.90
 -16   4   2   -0.30    7.00
 -16   4   2    1.90    1.90
  16  -4  -2   -3.00    3.10
  16  -4  -2    3.30    3.80
  16  -4  -2    0.60    1.30
  16  -4  -2    1.60    1.30
 -16   4   3   60.10   13.10
 -16   4   3  114.60    6.90
  16  -4  -3  104.80   13.90
  16  -4  -3   79.30    4.00
  16  -4  -3   80.30    4.40
 -16   4   4    0.00    5.50
 -16   4   4    3.90    2.90
  16  -4  -4    0.20    4.10
  16  -4  -4   -1.40    1.20
  16  -4  -4    2.00    1.30
 -16   4   5   51.40    6.80
  16  -4  -5   51.40    3.40
  16  -4  -5   58.40    4.00
  16  -4  -6    7.80    2.80
 -16   5   1   19.10    2.70
  16  -5  -1   19.40    4.50
  16  -5  -1   13.20    1.90
 -16   5   2   57.30   11.60
 -16   5   2  107.80    6.20
  16  -5  -2   87.10   12.30
 -16   5   3    0.40    5.80
  16  -5  -3    4.70    4.10
  16  -5  -3    2.40    1.50
  16  -5  -3    5.00    1.50
 -16   5   4   42.40    5.30
  16  -5  -4   50.50    3.80
 -16   5   5    1.90    2.50
  16  -5  -5    0.80    1.40
  16  -5  -5    0.20    1.40
  16  -5  -6   24.60    3.20
  16  -5  -6   28.50    3.40
 -16   6   1   19.80    7.10
 -16   6   1   31.90    3.20
  16  -6  -1   27.10    7.00
  16  -6  -1   29.80    5.30
  16  -6  -1   34.30    2.80
 -16   6   2    5.70    5.00
 -16   6   2   12.50    2.50
  16  -6  -2   16.30    5.30
  16  -6  -2   14.10    2.10
 -16   6   3   38.60    8.70
 -16   6   3   84.50    5.50
  16  -6  -3   84.20   12.10
  16  -6  -3   92.70    4.60
 -16   6   4    1.90    2.10
  16  -6  -4    1.70    1.40
 -16   7   1    8.30    5.50
  16  -7  -1    8.60    4.40
 -16   7   2   13.80    6.80
  15  11  -1    8.70    5.30
  15  10  -1  104.90   13.90
  15  10  -2   -1.30    4.50
  15   9  -1   15.60    5.30
  15   9  -1   18.30    7.90
  15   9  -2   62.90   10.40
  15   9  -3    0.60    5.20
  15   8  -1   87.90   14.50
  15   8  -2   10.50    4.70
  15   8  -3   75.60   11.70
 -15  -7   1   10.30    2.20
 -15  -7   1   12.70    4.50
  15   7  -1   11.90    4.90
  15   7  -1   18.30    8.10
  15   7  -1    8.90    1.20
  15   7  -2   45.60    8.40
  15   7  -2   37.70    9.90
  15   7  -3   46.80    8.50
  15   7  -4  126.30   16.40
 -15  -6   1   54.30    3.40
 -15  -6   1   54.10    3.70
  15   6  -1   44.90    2.10
 -15  -6   2   31.80    3.80
  15   6  -2   22.10    6.10
  15   6  -2   22.50    7.50
  15   6  -2   16.80    1.40
  15   6  -2   19.90    1.20
  15   6  -3   25.80    6.40
  15   6  -3   26.70    8.10
  15   6  -4   27.30    7.00
 -15  -5   1  118.50   17.80
 -15  -5   1  125.30    5.20
  15   5  -1  118.40   15.10
  15   5  -1  115.90   16.10
 -15  -5   2   38.90   10.60
 -15  -5   2   40.70    3.70
 -15  -5   2   38.10    3.00
  15   5  -2   39.90    7.70
  15   5  -2   35.80    8.90
  15   5  -2   33.40    1.90
  15   5  -3   25.70    7.70
  15   5  -3   35.20    8.90
 -15  -5   4   55.00   13.20
  15   5  -4   46.70    8.40
 -15  -5   5    2.10    9.10
  15   5  -5   -0.50    5.00
 -15  -4   1    7.60    8.10
 -15  -4   1    4.80    1.70
 -15  -4   1    5.70    1.80
  15   4  -1    6.00    4.00
  15   4  -1    3.50    1.40
  15   4  -1    3.90    1.30
 -15  -4   2  103.50   16.30
 -15  -4   2  111.30    5.60
  15   4  -2   76.20   11.00
  15   4  -2   77.90   12.30
  15   4  -2   70.30    3.10
  15   4  -2   81.70    3.40
 -15  -4   3   77.40   14.90
 -15  -4   3   75.70    4.00
  15   4  -3   78.80   11.20
  15   4  -3   76.10   12.00
  15   4  -3   52.10    2.50
 -15  -4   4    4.70    7.10
  15   4  -4    3.60    3.70
  15   4  -4    0.80    5.00
  15   4  -4    4.80    1.20
 -15  -4   5   86.30   15.60
  15   4  -5   62.80   10.30
 -15  -3   1   98.80   16.90
  15   3  -1   92.00   12.40
  15   3  -1   84.90   12.90
 -15  -3   2   34.70   10.10
 -15  -3   2   42.50    3.50
  15   3  -2   23.30    5.60
  15   3  -2   27.90    7.30
  15   3  -2   32.60    2.30
  15   3  -2   33.00    2.40
 -15  -3   3   35.40    9.30
 -15  -3   3   62.20    5.40
  15   3  -3   41.30    7.70
  15   3  -3   38.10    8.50
  15   3  -3   25.10    2.10
  15   3  -3   37.70    2.50
 -15  -3   4  105.90   16.70
 -15  -3   4  129.10   22.50
 -15  -3   4  113.00    5.30
  15   3  -4  106.60   13.60
  15   3  -4   92.20   13.00
  15   3  -4   93.70    3.80
  15   3  -4   84.90    3.50
 -15  -3   5   -3.60    6.30
  15   3  -5   -0.90    2.70
  15   3  -5    0.50    1.30
  15   3  -5    0.30    0.90
 -15  -3   6   42.00   12.00
  15   3  -6   54.60   10.00
 -15  -2   1    8.10    6.60
 -15  -2   1    8.30    1.80
  15   2  -1   10.30    4.40
  15   2  -1    6.00    5.00
  15   2  -1    6.20    1.20
 -15  -2   2   75.20   13.90
 -15  -2   2   88.10    4.80
  15   2  -2   74.00   10.60
  15   2  -2   62.10   10.10
  15   2  -2   50.80    2.80
  15   2  -2   63.20    3.50
 -15  -2   3   32.10    9.60
  15   2  -3   24.70    5.90
  15   2  -3   33.60    7.40
  15   2  -3   29.70    2.40
 -15  -2   4   73.40   11.00
  15   2  -4   54.70    9.30
  15   2  -4   48.40    2.90
  15   2  -4   50.70    3.00
 -15  -2   5   90.90   15.50
  15   2  -5   83.30   11.80
  15   2  -5   91.30    4.10
 -15  -2   6    1.50    6.60
  15   2  -6   -0.20    3.10
 -15  -1   1  130.30   19.30
 -15  -1   1  138.10    5.90
  15   1  -1  129.60   16.00
  15   1  -1  115.00   14.50
 -15  -1   2    3.30    6.10
 -15  -1   2    4.90    1.70
  15   1  -2    2.00    2.90
  15   1  -2    1.90    4.50
  15   1  -2    2.80    1.20
  15   1  -2    1.60    1.30
 -15  -1   3   56.50   12.20
 -15  -1   3   63.70    4.70
  15   1  -3   52.80    8.80
  15   1  -3   67.00    9.80
  15   1  -3   39.50    2.50
  15   1  -3   53.30    3.60
  15   1  -4   65.40    9.70
  15   1  -4   42.60    2.60
  15   1  -4   43.70    3.00
 -15  -1   5   21.20    8.20
 -15  -1   5   22.80   14.90
  15   1  -5   13.20    2.10
  15   1  -5   11.50    1.90
 -15  -1   6   40.00   10.80
  15   1  -6   42.30    7.90
  15   1  -6   40.20    3.10
  15   1  -6   37.80    3.00
 -15   0   1    2.00    2.40
 -15   0   1    4.70    7.10
 -15   0   1    0.70    1.60
  15   0  -1    5.20    4.00
  15   0  -1    3.80    4.20
  15   0  -1    2.60    1.30
 -15   0   2   76.20   14.40
 -15   0   2   87.30    4.70
  15   0  -2   74.80   11.20
  15   0  -2   97.20    4.10
  15   0  -2   89.30    4.50
 -15   0   3   17.40    7.90
 -15   0   3   15.60    2.80
  15   0  -3   17.30    5.30
  15   0  -3   11.80    4.80
  15   0  -3   13.70    1.80
  15   0  -3   13.10    2.00
 -15   0   4   27.40   10.20
 -15   0   4   49.60    5.40
  15   0  -4   28.90    7.20
  15   0  -4   34.80    7.10
  15   0  -4   36.50    2.50
  15   0  -4   36.20    3.00
 -15   0   5   38.00   10.40
 -15   0   5   89.70   15.30
  15   0  -5   28.80    2.40
  15   0  -5   40.00    3.10
 -15   0   6   16.90    7.50
  15   0  -6   12.60    5.30
  15   0  -6   22.10    2.60
  15   0  -6   16.50    2.30
 -15   1   1   61.30    8.50
 -15   1   1   59.90   13.50
 -15   1   1   70.90    4.20
  15  -1  -1   68.40   10.60
  15  -1  -1   64.20    9.10
 -15   1   2    4.40    6.80
 -15   1   2    4.20    1.80
  15  -1  -2    2.50    3.10
  15  -1  -2    2.80    1.30
  15  -1  -2    5.10    1.50
 -15   1   3   88.50   15.80
  15  -1  -3   90.80   12.20
  15  -1  -3   80.40   10.50
  15  -1  -3   79.80    4.30
 -15   1   4   32.30   10.70
 -15   1   4   42.00    4.80
  15  -1  -4   35.20    2.50
  15  -1  -4   41.20    3.30
 -15   1   5   28.90    9.10
 -15   1   5   26.10    6.80
  15  -1  -5   27.90    6.30
  15  -1  -5   29.60    6.90
  15  -1  -5   19.80    2.20
  15  -1  -5   30.20    2.80
 -15   1   6   38.70    9.80
 -15   1   6   39.30   17.10
  15  -1  -6   42.30    8.00
  15  -1  -6   28.60    2.80
  15  -1  -6   33.60    2.80
  15  -1  -7   25.50    3.00
 -15   2   1    1.00    7.80
 -15   2   1    5.20    1.80
  15  -2  -1    4.70    3.70
  15  -2  -1    0.90    3.40
  15  -2  -1   -0.80    0.90
  15  -2  -1    2.20    1.50
 -15   2   2   72.80   14.70
 -15   2   2   79.60    4.60
  15  -2  -2   67.20   10.60
  15  -2  -2   94.50    4.10
  15  -2  -2   80.00    4.50
 -15   2   3   -1.10    8.10
 -15   2   3    1.10    1.90
  15  -2  -3    3.10    3.20
  15  -2  -3    4.70    3.90
  15  -2  -3    1.40    1.20
 -15   2   4   55.00    5.30
  15  -2  -4   48.50    7.50
  15  -2  -4   41.20    2.60
  15  -2  -4   51.70    3.60
 -15   2   5   32.20    9.60
 -15   2   5   21.60    6.10
  15  -2  -5   35.70    7.20
  15  -2  -5   32.90    2.50
  15  -2  -5   41.40    3.20
 -15   2   6   52.10   11.30
 -15   2   6   60.70   17.30
  15  -2  -6   55.80    9.30
  15  -2  -6   51.30    3.50
  15  -2  -7   75.30    4.40
  15  -2  -7   82.10    4.50
 -15   3   1   62.70   14.20
 -15   3   1   88.70    5.00
  15  -3  -1   65.00   10.30
  15  -3  -1   74.00    8.90
  15  -3  -1   70.30    3.40
  15  -3  -1   73.70    4.30
 -15   3   2   11.90    9.10
 -15   3   2    4.90    2.00
  15  -3  -2    1.30    3.50
  15  -3  -2    1.80    3.30
  15  -3  -2    1.90    1.20
  15  -3  -2    3.80    1.60
 -15   3   3   81.30   15.80
 -15   3   3  103.00    6.00
  15  -3  -3   94.40   13.00
  15  -3  -3   91.10   10.50
  15  -3  -3   84.70    3.80
  15  -3  -3   90.10    4.80
 -15   3   4   14.80    3.30
  15  -3  -4   11.00    4.30
  15  -3  -4    8.10    1.60
  15  -3  -4   14.50    2.20
 -15   3   5   92.90   16.00
 -15   3   5  105.70    8.90
  15  -3  -5   97.50   13.00
  15  -3  -5   69.00    3.50
  15  -3  -5   79.90    4.40
 -15   3   6   34.10    9.70
 -15   3   6   33.20   12.10
  15  -3  -6   36.50    7.60
  15  -3  -6   23.20    2.50
 -15   3   7   39.10   19.00
  15  -3  -7   29.00    3.20
  15  -3  -7   36.70    3.30
 -15   4   1   56.10   14.60
 -15   4   1   87.20    5.30
  15  -4  -1   63.50   10.40
  15  -4  -1   63.80    7.70
 -15   4   2   95.60   17.10
 -15   4   2  107.80    5.70
  15  -4  -2  105.30   13.90
  15  -4  -2   99.80   11.10
 -15   4   3   10.20    7.90
  15  -4  -3    3.20    3.50
  15  -4  -3    5.70    3.60
  15  -4  -3    2.10    1.30
  15  -4  -3    6.40    1.70
 -15   4   4   48.40   12.20
 -15   4   4   53.30    5.30
  15  -4  -4   53.60    9.40
  15  -4  -4   58.00    7.90
  15  -4  -4   60.10    3.80
 -15   4   5    6.00    7.20
 -15   4   5    7.10    3.50
  15  -4  -5   11.40    4.80
  15  -4  -5    4.90    1.50
  15  -4  -5    7.10    1.80
 -15   4   6   55.30   11.90
 -15   4   6   64.30   10.90
  15  -4  -6   63.10   10.10
  15  -4  -6   57.30    3.60
  15  -4  -6   59.00    3.90
 -15   4   7   17.00   11.40
  15  -4  -7   19.40    2.80
  15  -4  -7   23.70    2.60
 -15   5   1   21.00    9.80
 -15   5   1   16.60    2.60
  15  -5  -1   16.90    5.50
  15  -5  -1   16.70    1.80
  15  -5  -1   18.40    2.30
 -15   5   2   13.10    9.20
 -15   5   2   17.20    2.70
  15  -5  -2   20.90    6.00
  15  -5  -2   22.40    4.30
  15  -5  -2   20.60    2.00
  15  -5  -2   18.20    2.20
 -15   5   3  108.60   18.30
 -15   5   3  135.70    7.20
  15  -5  -3  120.80   15.80
  15  -5  -3  119.50   12.40
  15  -5  -3  104.00    4.30
  15  -5  -3  105.00    5.00
 -15   5   4   19.40    9.40
 -15   5   4   11.70    3.30
  15  -5  -4    6.50    4.30
  15  -5  -4    9.40    3.80
  15  -5  -4    7.20    1.60
 -15   5   5   40.20   11.00
 -15   5   5   55.90    6.40
  15  -5  -5   42.40    8.60
  15  -5  -5   29.50    2.60
 -15   5   6    2.30    6.70
 -15   5   6   10.30    6.00
  15  -5  -6    3.40    3.60
  15  -5  -6    1.40    1.50
  15  -5  -6    7.00    1.80
 -15   5   7   -2.50   10.90
  15  -5  -7   11.30    2.30
  15  -5  -7   10.90    2.10
  15  -5  -8   40.40    4.10
  15  -5  -8   40.60    3.50
 -15   6   1   29.70   10.70
 -15   6   1   32.60    3.30
  15  -6  -1   26.00    6.70
  15  -6  -1   27.00    4.60
  15  -6  -1   17.40    1.90
  15  -6  -1   21.80    2.30
 -15   6   2   63.70   14.00
  15  -6  -2   73.80   12.10
  15  -6  -2   91.40    9.50
  15  -6  -2   70.60    4.00
 -15   6   3    1.90    7.60
 -15   6   3    2.30    2.10
  15  -6  -3    3.00    3.50
  15  -6  -3    2.60    3.40
  15  -6  -3   -0.20    1.10
  15  -6  -3    1.30    1.20
 -15   6   4   64.60   13.90
 -15   6   4  124.80    7.60
  15  -6  -4   77.90   12.10
 -15   6   5    7.90    6.20
 -15   6   5    9.60    3.80
  15  -6  -5    8.80    4.20
  15  -6  -5    7.40    1.80
  15  -6  -5    8.60    1.80
  15  -6  -6   25.40    2.70
  15  -6  -6   38.20    3.30
 -15   6   7    8.80    6.30
  15  -6  -7   18.70    2.70
  15  -6  -7   18.00    2.70
  15  -6  -8   10.80    2.90
  15  -6  -8   16.10    2.70
 -15   7   1   25.90    9.70
 -15   7   1   47.30    3.90
  15  -7  -1   51.90    9.80
  15  -7  -1   38.00    5.50
  15  -7  -1   55.80    3.20
 -15   7   2   11.50    8.00
 -15   7   2   19.40    2.90
  15  -7  -2   18.90    4.30
  15  -7  -2   12.00    1.80
 -15   7   3   52.80   11.10
 -15   7   3  106.50    6.50
  15  -7  -3   74.40   11.60
  15  -7  -3   72.00    9.00
  15  -7  -3   72.00    3.70
 -15   7   4    1.90    5.20
 -15   7   4    4.60    2.50
  15  -7  -4    1.40    3.30
  15  -7  -4    2.20    1.30
 -15   7   5   28.20   10.00
 -15   7   5   82.70    7.20
  15  -7  -5   56.20   12.40
  15  -7  -5   60.70    3.50
  15  -7  -5   81.30    4.70
 -15   7   6    2.70    2.90
  15  -7  -6    5.50    1.60
  15  -7  -6    6.60    1.90
  15  -7  -7   48.50    3.70
  15  -7  -7   39.30    3.50
 -15   8   1   18.80    7.50
  15  -8  -1   38.40    8.50
  15  -8  -1   37.90    5.60
 -15   8   2   23.60    7.70
  15  -8  -2   37.30    8.10
  15  -8  -2   43.10    5.90
 -15   8   3    5.60    5.50
 -15   8   3   12.10    2.70
  15  -8  -3   13.40    5.00
 -15   8   4   23.00    6.60
 -15   8   4   39.70    4.30
  15  -8  -4   44.10    8.90
  15  -8  -4   34.20    2.90
 -15   8   5    1.40    2.20
  15  -8  -5    1.30    1.40
 -15   8   6   39.70    5.70
  15  -8  -6   86.20    4.70
 -15   9   1    0.90    5.10
  15  -9  -1    5.60    4.30
  15  -9  -1    7.90    4.60
 -15   9   2   20.20    6.50
  15  -9  -2   31.60    7.50
 -15   9   3   18.20    6.80
  14  12  -1    6.30    4.20
  14  12  -2   61.40   11.00
  14  11  -1  177.90   20.00
  14  11  -2   -1.70    4.20
  14  11  -3  131.30   16.90
  14  10  -1   21.40    7.10
  14  10  -1   26.70    9.90
  14  10  -2  100.20   13.50
  14  10  -3    3.60    4.20
  14   9  -1   91.50   12.20
  14   9  -1   79.50   14.00
  14   9  -3   73.70   11.20
  14   9  -4    2.70    4.40
  14   8  -1   42.90    7.80
  14   8  -1   50.30   10.90
  14   8  -2  134.90   16.50
  14   8  -2  139.80   18.80
  14   8  -4  114.10   14.90
  14   8  -5    0.00    4.50
 -14  -7   1   74.70    3.10
 -14  -7   1   88.70    7.20
  14   7  -1   68.00   10.20
  14   7  -1   66.50   12.20
  14   7  -2   46.30    8.20
  14   7  -2   69.10   12.70
  14   7  -3  133.20   16.60
  14   7  -3  155.90   19.80
  14   7  -4   12.60    4.90
  14   7  -5   66.60   10.60
  14   7  -6    8.00    5.50
 -14  -6   1   81.60   12.00
 -14  -6   1   73.20    3.30
 -14  -6   1   67.90    3.70
  14   6  -1   73.20   10.50
  14   6  -1   80.20   13.10
  14   6  -2   83.00   11.40
  14   6  -2   78.50    2.40
  14   6  -2   80.20    2.30
 -14  -6   3   73.30   13.80
  14   6  -3   78.00   11.00
  14   6  -3   56.80   11.30
 -14  -6   4  146.00   20.60
  14   6  -4  146.60   17.80
 -14  -6   5   -1.30    5.60
  14   6  -5    0.30    3.40
 -14  -6   6   55.30   12.80
  14   6  -6   59.90   10.30
 -14  -5   1   33.40    6.50
 -14  -5   1   38.40    2.60
 -14  -5   1   35.60    2.80
  14   5  -1   39.60    9.10
  14   5  -1   32.40    2.00
  14   5  -1   29.60    1.90
 -14  -5   2   63.30   12.30
 -14  -5   2   75.90    3.90
 -14  -5   2   66.70    3.50
  14   5  -2   67.70   10.30
  14   5  -2   63.10   11.30
 -14  -5   3   27.50    9.60
  14   5  -3   30.20    6.90
  14   5  -3   31.10    8.30
  14   5  -3   30.40    1.70
  14   5  -3   24.50    1.10
 -14  -5   4   61.80   12.60
  14   5  -4   50.50    8.70
  14   5  -4   59.80   10.50
 -14  -5   5  142.60   20.10
  14   5  -5  121.50   15.70
 -14  -5   6   13.90    8.20
  14   5  -6    9.00    4.90
 -14  -5   7   73.20   14.80
  14   5  -7   53.60   10.20
 -14  -4   1  163.10   18.40
 -14  -4   1  162.90   21.00
 -14  -4   1  177.40    6.10
  14   4  -1  169.10   19.70
  14   4  -1  171.50   20.40
  14   4  -1  168.80    5.20
  14   4  -1  167.70    5.50
 -14  -4   2   69.90    9.60
 -14  -4   2   66.10   12.40
 -14  -4   2   70.00    3.80
 -14  -4   2   71.20    3.90
  14   4  -2   69.90   10.50
  14   4  -2   74.50   11.50
  14   4  -2   64.70    2.80
  14   4  -2   61.70    2.90
 -14  -4   3   62.50   12.00
 -14  -4   3   73.30    6.20
 -14  -4   3   62.30    3.50
  14   4  -3   49.60    8.60
  14   4  -3   48.50    2.50
  14   4  -3   48.50    2.30
 -14  -4   4   89.80   14.90
 -14  -4   4   61.10    6.70
 -14  -4   4   81.80    3.10
  14   4  -4   77.60   11.30
  14   4  -4   84.80   12.10
  14   4  -4   88.70    3.00
 -14  -4   5    3.90    7.00
  14   4  -5    5.70    4.00
  14   4  -5    2.00    5.20
 -14  -4   6   88.40   15.80
  14   4  -6   84.30   12.00
 -14  -4   7   17.80    9.60
  14   4  -7   23.60    6.90
 -14  -3   1    0.80    2.20
 -14  -3   1    1.20    6.10
 -14  -3   1   -0.10    1.20
  14   3  -1    0.90    2.60
  14   3  -1    2.90    4.50
  14   3  -1    0.40    0.90
  14   3  -1    1.00    1.00
 -14  -3   2  176.40   19.10
 -14  -3   2  183.50    6.60
  14   3  -2  140.00   18.70
 -14  -3   3   92.80   14.70
 -14  -3   3  106.20    5.60
  14   3  -3  103.00   13.20
  14   3  -3   94.40   13.10
  14   3  -3   83.80    3.30
 -14  -3   4   34.30    9.70
  14   3  -4   22.40    5.60
  14   3  -4   24.80    6.70
  14   3  -4   26.00    1.90
 -14  -3   5   98.10   15.60
 -14  -3   5   68.80    7.40
 -14  -3   6   14.70    7.90
  14   3  -6    8.20    4.20
  14   3  -6   14.50    5.70
 -14  -3   7  155.30   21.60
  14   3  -7  160.80   19.00
 -14  -2   1  166.70   18.40
 -14  -2   1  176.80   22.10
 -14  -2   1  175.80    6.40
  14   2  -1  160.00   19.00
  14   2  -1  174.90   19.70
 -14  -2   2   -0.50    2.00
 -14  -2   2    1.30    5.80
 -14  -2   2    0.80    1.30
  14   2  -2    0.90    2.90
  14   2  -2    0.60    4.00
  14   2  -2    0.10    0.90
  14   2  -2    1.30    1.10
 -14  -2   3  138.00   18.30
 -14  -2   3  137.40    6.10
  14   2  -3  111.20    4.50
 -14  -2   4   72.60   13.70
 -14  -2   4   92.20    8.20
  14   2  -4   67.20   10.10
  14   2  -4   78.60   11.20
  14   2  -4   70.60    3.20
  14   2  -4   74.10    3.50
 -14  -2   5   13.00    7.00
 -14  -2   5   11.50   13.60
  14   2  -5   11.10    4.30
  14   2  -5    8.00    4.70
  14   2  -5   11.70    1.80
  14   2  -5   10.50    1.50
 -14  -2   6   46.10   12.40
  14   2  -6   51.40    9.60
  14   2  -6   63.10    9.60
 -14  -2   7    2.70    7.00
  14   2  -7    2.40    3.70
 -14  -2   8   88.50   15.60
  14   2  -8   92.20   13.10
 -14  -1   1    1.30    2.20
 -14  -1   1   -1.20    6.70
 -14  -1   1    1.90    1.40
  14   1  -1    2.40    3.10
  14   1  -1    5.00    4.40
  14   1  -1    3.40    1.00
 -14  -1   2  107.80   12.60
 -14  -1   2  109.60   16.30
 -14  -1   2  120.10    5.30
  14   1  -2   99.40   13.30
  14   1  -2  102.80   12.90
 -14  -1   3    6.20    3.30
 -14  -1   3    9.60    6.40
  14   1  -3    6.20    3.60
  14   1  -3    8.30    4.60
  14   1  -3    8.20    1.60
 -14  -1   4   80.80   13.90
 -14  -1   4   80.30    6.00
  14   1  -4   80.00   11.10
  14   1  -4   76.30    3.30
  14   1  -4   73.70    3.70
 -14  -1   5   79.10   16.50
  14   1  -5   60.70    9.40
  14   1  -5   74.20   10.30
  14   1  -5   59.90    3.30
  14   1  -5   57.30    3.30
 -14  -1   6    8.90   12.90
  14   1  -6   21.50    5.90
  14   1  -6   16.70    2.10
 -14  -1   7   54.00   11.80
  14   1  -7   50.30    8.60
  14   1  -7   36.30    2.50
 -14  -1   8    7.00    7.40
  14   1  -8   11.30    5.60
 -14   0   1  160.50   17.30
 -14   0   1  178.20   22.20
  14   0  -1  149.30   18.20
  14   0  -1  165.10   17.90
 -14   0   2    5.00    2.70
 -14   0   2    5.60    5.90
 -14   0   2    5.80    1.70
  14   0  -2    6.60    3.80
  14   0  -2    3.30    3.70
 -14   0   3   44.80    6.60
 -14   0   3   36.40    9.70
 -14   0   3   40.10    3.30
  14   0  -3   37.50    7.20
  14   0  -3   50.40    8.00
  14   0  -3   43.80    2.60
 -14   0   4    9.90    7.10
 -14   0   4   11.60    2.80
  14   0  -4   10.00    4.20
  14   0  -4   10.20    1.60
  14   0  -4   10.40    1.80
 -14   0   5   60.10   12.30
  14   0  -5   55.90    9.00
  14   0  -5   62.40    9.10
  14   0  -5   60.30    3.60
 -14   0   6   51.30   13.90
 -14   0   6  115.20   27.20
  14   0  -6   86.50   12.70
  14   0  -6   89.70   11.30
  14   0  -6   87.00    4.10
  14   0  -6   85.70    4.20
 -14   0   7    2.40    5.90
 -14   0   7    0.60   10.90
  14   0  -7    0.50    2.60
  14   0  -7    3.60    1.60
  14   0  -7    2.80    1.40
 -14   0   8   54.30   11.70
  14   0  -8   63.20   10.30
  14   0  -8   64.50    3.00
 -14   1   1    7.20    3.00
 -14   1   1   10.00    7.30
 -14   1   1    6.00    1.60
  14  -1  -1    9.30    4.20
  14  -1  -1    8.50    4.10
  14  -1  -1    4.60    1.20
  14  -1  -1    6.60    1.60
 -14   1   2   89.60   10.80
 -14   1   2   86.50   14.60
 -14   1   2  103.10    5.10
  14  -1  -2   82.70   11.80
  14  -1  -2   86.00   10.60
 -14   1   3   11.10    3.40
 -14   1   3   10.50    7.00
 -14   1   3   12.30    2.20
  14  -1  -3   13.10    4.80
  14  -1  -3    9.80    4.40
  14  -1  -3   11.50    1.60
  14  -1  -3   12.40    2.00
 -14   1   4   51.70   11.20
 -14   1   4   54.00    4.40
  14  -1  -4   54.70    8.80
  14  -1  -4   46.70    2.70
  14  -1  -4   48.60    3.40
 -14   1   5   45.10   11.00
 -14   1   5   53.50    6.60
  14  -1  -5   46.50    8.30
  14  -1  -5   38.60    6.90
  14  -1  -5   53.00    3.00
 -14   1   6   20.50    9.00
 -14   1   6   21.50   15.10
  14  -1  -6   19.60    5.80
  14  -1  -6   23.80    5.50
  14  -1  -6   14.60    2.10
  14  -1  -6   25.10    2.60
 -14   1   7  130.50   18.50
  14  -1  -7  126.10   15.70
  14  -1  -7  117.60   15.20
  14  -1  -7  125.00    5.10
  14  -1  -7  118.20    5.30
 -14   1   8   14.80    8.50
 -14   1   8   10.10    9.00
  14  -1  -8   12.90    5.30
  14  -1  -8    9.70    1.90
  14  -1  -8   10.20    2.00
 -14   2   1   27.00    5.10
 -14   2   1   33.20    9.90
 -14   2   1   34.90    2.90
  14  -2  -1   33.50    7.20
  14  -2  -1   30.80    5.60
  14  -2  -1   26.80    2.00
  14  -2  -1   32.20    2.80
 -14   2   2    8.70    3.50
 -14   2   2    8.10    7.90
  14  -2  -2    2.20    3.10
  14  -2  -2    7.20    3.90
  14  -2  -2    4.30    1.20
  14  -2  -2    7.20    1.70
 -14   2   3  128.50   14.80
 -14   2   3  146.70   20.40
 -14   2   3  132.90    6.10
  14  -2  -3  154.60   18.50
  14  -2  -3  151.10   16.00
 -14   2   4   29.30    8.90
 -14   2   4   32.30    3.50
  14  -2  -4   33.40    7.00
  14  -2  -4   30.60    2.30
  14  -2  -4   30.30    2.80
 -14   2   5   62.00   12.30
 -14   2   5   56.40    6.00
  14  -2  -5   57.40    9.40
  14  -2  -5   62.00    8.40
  14  -2  -5   58.60    3.10
  14  -2  -5   60.60    3.80
 -14   2   6   30.60   12.10
 -14   2   6   63.00   14.20
  14  -2  -6   43.20    6.90
  14  -2  -6   42.80    3.00
  14  -2  -6   49.70    3.50
 -14   2   7   66.10   13.10
 -14   2   7   47.40   24.30
  14  -2  -7   62.80    9.90
  14  -2  -7   65.70    3.80
  14  -2  -7   61.40    3.80
 -14   2   8  135.80   18.80
 -14   2   8  134.50   22.80
  14  -2  -8  138.50   17.10
  14  -2  -8  132.90    5.50
 -14   3   1    5.40    2.90
 -14   3   1   11.10    8.80
 -14   3   1    7.60    1.90
  14  -3  -1    8.70    4.20
  14  -3  -1    7.20    3.30
  14  -3  -1    7.90    1.20
  14  -3  -1    9.40    1.90
 -14   3   2  100.40   11.70
 -14   3   2   90.80   15.40
 -14   3   2   94.40    4.90
  14  -3  -2   83.20   12.10
  14  -3  -2   93.00   10.30
  14  -3  -2   90.50    3.80
 -14   3   3   -0.10    7.30
 -14   3   3    7.90    2.00
  14  -3  -3    4.30    3.40
  14  -3  -3    6.30    3.60
  14  -3  -3    4.50    1.40
  14  -3  -3    7.00    1.80
 -14   3   4  217.90   26.30
 -14   3   4  204.10    8.70
  14  -3  -4  183.10   21.80
  14  -3  -4  189.80   19.60
  14  -3  -4  194.90    6.30
  14  -3  -4  188.10    7.10
 -14   3   5   31.30   10.00
 -14   3   5   29.30    4.50
  14  -3  -5   30.20    7.00
  14  -3  -5   22.40    4.40
  14  -3  -6   86.50   10.00
  14  -3  -6   92.70    4.80
 -14   3   7   35.90    9.90
 -14   3   7   33.30   19.00
  14  -3  -7   23.60    6.00
  14  -3  -7   25.30    2.70
  14  -3  -7   29.10    2.90
 -14   3   8   36.10    9.50
 -14   3   8   37.30   21.00
  14  -3  -8   26.00    6.40
  14  -3  -8   22.90    2.80
  14  -3  -8   28.50    2.80
  14  -3  -9   51.40    3.40
  14  -3  -9   47.60    3.60
 -14   4   1  115.40   12.90
 -14   4   1   94.20   16.80
 -14   4   1  116.40    5.50
  14  -4  -1  115.10   15.10
  14  -4  -1  107.50   11.40
  14  -4  -1  100.10    3.90
  14  -4  -1  105.90    5.10
 -14   4   2   18.30    4.40
 -14   4   2   16.50    2.30
  14  -4  -2   23.20    4.50
  14  -4  -2   19.60    1.80
  14  -4  -2   21.00    2.50
 -14   4   3  112.90   18.50
 -14   4   3  141.70    6.60
  14  -4  -3  127.20   16.70
  14  -4  -3  142.90   14.60
  14  -4  -3  147.90    5.30
  14  -4  -3  131.90    5.80
 -14   4   4    1.90    8.10
 -14   4   4    4.60    2.40
  14  -4  -4    4.70    3.60
  14  -4  -4    5.40    3.50
  14  -4  -4    3.20    1.20
  14  -4  -4    3.10    1.60
 -14   4   5  124.40   18.30
 -14   4   5  137.60    8.40
  14  -4  -5  112.50   15.20
  14  -4  -5  121.10   12.70
  14  -4  -5  108.70    4.30
  14  -4  -5  123.50    5.70
 -14   4   6   22.70    9.40
 -14   4   6   35.80    7.30
  14  -4  -6   23.00    6.20
  14  -4  -6   19.50    4.30
  14  -4  -6   17.80    2.10
 -14   4   7   35.40    9.80
 -14   4   7   34.20   18.00
  14  -4  -7   30.50    6.80
  14  -4  -7   41.50    3.10
 -14   4   8   38.30   24.80
  14  -4  -8   52.40    9.30
  14  -4  -8   47.30    3.50
  14  -4  -8   55.30    3.80
 -14   4   9   -4.80   14.70
  14  -4  -9    2.90    1.90
  14  -4  -9    6.00    1.80
 -14   5   1   64.90    8.70
 -14   5   1   51.10   12.80
 -14   5   1   61.30    4.00
  14  -5  -1   55.60    9.90
  14  -5  -1   63.90    7.40
  14  -5  -1   62.30    3.00
  14  -5  -1   67.40    4.10
 -14   5   2   65.70    9.00
 -14   5   2   52.00   14.80
  14  -5  -2   60.30   10.90
  14  -5  -2   71.90    8.00
  14  -5  -2   73.60    4.30
 -14   5   3   12.30    8.40
 -14   5   3    8.80    2.50
  14  -5  -3    4.70    3.60
  14  -5  -3    6.10    1.70
  14  -5  -3    8.20    1.80
 -14   5   4   41.20   11.90
 -14   5   4   70.10    5.30
  14  -5  -4   64.20   10.20
  14  -5  -4   62.70    7.50
  14  -5  -4   70.00    3.40
  14  -5  -4   60.00    3.90
 -14   5   5    8.50    8.10
 -14   5   5    2.80    2.70
  14  -5  -5    4.30    3.40
  14  -5  -5    2.60    3.30
  14  -5  -5    2.00    1.10
  14  -5  -5    2.90    1.50
 -14   5   6   45.60   11.10
 -14   5   6   57.80    8.00
  14  -5  -6   40.80    8.00
  14  -5  -6   48.60    6.50
 -14   5   7   32.90    9.60
 -14   5   7   37.70   14.90
  14  -5  -7   39.30    8.00
  14  -5  -7   26.10    2.60
  14  -5  -7   33.90    3.00
 -14   5   8    5.90    5.40
 -14   5   8    7.60   16.60
  14  -5  -8    7.50    4.20
  14  -5  -8   10.30    2.20
  14  -5  -8    9.80    2.00
 -14   5   9   59.20   18.10
  14  -5  -9   61.90    4.10
  14  -5  -9   64.60    4.20
 -14   6   1    9.90    3.90
 -14   6   1    8.50    9.10
 -14   6   1   24.30    2.80
  14  -6  -1   19.20    6.30
  14  -6  -1   13.80    3.40
  14  -6  -1   16.90    1.70
  14  -6  -1   20.10    2.40
 -14   6   2   58.20   13.40
 -14   6   2   67.20    4.40
  14  -6  -2   45.40    8.90
  14  -6  -2   47.90    5.80
  14  -6  -2   43.50    2.60
  14  -6  -2   55.50    3.80
 -14   6   3  117.80   18.90
 -14   6   3  151.10    7.20
  14  -6  -3  141.00   17.40
  14  -6  -3  129.80   13.20
  14  -6  -3  136.00    4.90
 -14   6   4   13.10    8.50
 -14   6   4    9.70    2.80
  14  -6  -4    7.80    4.20
  14  -6  -4    4.60    3.10
  14  -6  -4    5.00    1.30
  14  -6  -4   10.40    2.00
 -14   6   5   81.80    6.90
  14  -6  -5   70.50    7.90
  14  -6  -5   52.70    3.00
  14  -6  -5   68.00    4.10
 -14   6   6    8.50    7.10
 -14   6   6    4.60    4.30
  14  -6  -6    2.30    2.90
  14  -6  -6    2.80    1.30
  14  -6  -6    4.10    1.50
 -14   6   7   30.80    9.70
 -14   6   7   50.50   13.70
  14  -6  -7   33.90    7.50
  14  -6  -7   23.20    2.60
  14  -6  -7   35.60    3.10
 -14   6   8   28.80   17.00
  14  -6  -8   30.30    2.90
  14  -6  -8   31.80    3.10
 -14   6   9    0.10   14.20
  14  -6  -9   11.50    2.30
  14  -6  -9   10.70    2.20
 -14   7   1   28.00   11.50
 -14   7   1   35.20    3.30
  14  -7  -1   25.50    6.90
  14  -7  -1   31.90    4.50
  14  -7  -1   24.70    2.20
  14  -7  -1   30.30    2.70
 -14   7   2   44.80   12.20
 -14   7   2   66.90    4.50
  14  -7  -2   63.50    3.30
  14  -7  -2   62.00    3.80
 -14   7   3   25.50    3.40
  14  -7  -3   18.40    5.70
  14  -7  -3   14.10    3.50
  14  -7  -3    9.50    1.60
  14  -7  -3   16.90    2.20
 -14   7   4   95.00   16.70
 -14   7   4  120.70    7.30
  14  -7  -4  108.90   14.30
  14  -7  -4   98.00   10.00
  14  -7  -4   79.40    3.60
  14  -7  -4   97.00    4.90
 -14   7   5    2.40    7.20
 -14   7   5    7.40    3.30
  14  -7  -5   10.40    4.80
  14  -7  -5    5.90    3.20
  14  -7  -5    5.30    1.40
  14  -7  -5    7.50    1.80
 -14   7   6   85.00   15.00
 -14   7   6  109.80    9.70
  14  -7  -6  112.20   14.50
  14  -7  -6   93.90    4.40
  14  -7  -6  104.30    5.20
 -14   7   7    3.60    6.40
 -14   7   7    9.00    9.60
  14  -7  -7   14.90    5.00
  14  -7  -7    9.00    1.90
  14  -7  -7   14.40    2.20
  14  -7  -8   27.70    2.90
  14  -7  -8   25.70    2.80
 -14   7   9   -3.70    8.30
  14  -7  -9   31.20    3.20
  14  -7  -9   26.70    3.10
  14  -7 -10   22.90    3.40
  14  -7 -10   21.00    3.00
 -14   8   1   24.70   10.50
 -14   8   1   34.20    3.20
  14  -8  -1   28.20    7.30
  14  -8  -1   24.60    4.00
  14  -8  -1   30.60    2.30
 -14   8   2   21.60    9.10
 -14   8   2   22.80    3.00
  14  -8  -2   23.80    6.40
  14  -8  -2   19.50    3.70
  14  -8  -2   17.40    1.90
 -14   8   3   65.90   13.90
 -14   8   3  110.60    6.40
  14  -8  -3   87.10   12.70
  14  -8  -3  103.90   10.20
  14  -8  -3   75.10    3.60
  14  -8  -3   82.60    4.30
 -14   8   4   11.60    8.10
  14  -8  -4    8.20    4.10
  14  -8  -4   12.60    3.70
  14  -8  -4    6.50    1.50
  14  -8  -4    8.90    1.70
 -14   8   5   41.80   10.60
 -14   8   5   82.30    7.20
  14  -8  -5   43.60    8.50
 -14   8   6    2.40    5.40
 -14   8   6    4.30    4.00
  14  -8  -6    0.80    3.20
  14  -8  -6    0.60    1.30
  14  -8  -6    3.60    1.50
 -14   8   7   39.00   12.30
 -14   8   8    4.20    6.40
  14  -8  -8   13.80    2.30
  14  -8  -8   11.20    2.30
 -14   8   9    4.20    6.10
  14  -8  -9   13.60    2.70
  14  -8  -9   19.30    2.60
 -14   9   1   58.50   12.40
 -14   9   1   61.60    4.60
  14  -9  -1   57.20   10.10
  14  -9  -1   67.70    7.70
 -14   9   2   22.90    9.10
 -14   9   2   60.90    4.60
  14  -9  -2   45.20    8.80
  14  -9  -2   48.50    6.40
  14  -9  -2   69.90    3.60
 -14   9   3   44.50    4.30
  14  -9  -3   37.60    5.30
  14  -9  -3   35.90    2.60
 -14   9   4   17.80    7.30
 -14   9   4   30.50    4.10
  14  -9  -4   24.30    6.10
  14  -9  -4   36.80    2.60
 -14   9   5    7.80    6.00
 -14   9   5   10.80    3.40
  14  -9  -5    9.30    4.80
  14  -9  -5    5.40    1.60
 -14   9   6   54.80    6.90
  14  -9  -6   61.20    3.60
 -14   9   7    1.40    3.50
  14  -9  -7    1.00    1.40
 -14   9   8   13.30    5.00
  14  -9  -8   58.50    4.20
 -14  10   1    1.40    5.00
  14 -10  -1   -1.70    2.90
  14 -10  -1    0.20    4.00
  14 -10  -2   46.90    6.40
 -14  10   3    9.80    5.60
  14 -10  -3   21.30    6.00
 -14  10   4    8.00    5.60
  14 -10  -4   19.10    5.80
  13  14  -1   97.00   12.00
  13  13  -1   23.00    5.70
  13  13  -2   93.40   12.20
  13  12  -2    0.90    3.70
  13  12  -3   90.80   12.00
  13  11  -1   49.20    8.10
  13  11  -3    2.30    3.50
  13  11  -4  145.90   17.50
  13  10  -1  118.90   14.50
  13  10  -2   27.50    6.70
  13  10  -4    0.00    3.80
  13  10  -5   87.50   12.40
  13   9  -1   32.20    6.90
  13   9  -1   48.90   10.70
  13   9  -2  124.90   15.40
  13   9  -3    1.70    3.40
 -13  -9   4  111.50   14.20
  13   9  -5   19.80    6.00
 -13  -8   1   99.80   13.50
  13   8  -1  110.60   16.00
  13   8  -2   25.30    5.90
  13   8  -3  110.80   14.20
  13   8  -4    1.10    3.30
 -13  -8   5  143.90   17.20
  13   8  -5  139.20   17.40
  13   8  -6    8.30    5.00
  13   8  -7   76.20   11.90
 -13  -7   1   50.30    8.30
 -13  -7   1   58.00    2.40
 -13  -7   1   63.70    6.10
  13   7  -1   61.90    9.30
  13   7  -1   61.30   11.00
 -13  -7   2   48.90    8.20
  13   7  -2   49.40   10.30
  13   7  -3   86.60   11.80
  13   7  -4  171.50   20.00
  13   7  -5   -1.60    3.40
 -13  -7   6   79.90   10.50
  13   7  -6   80.80   11.80
  13   7  -7   16.50    5.50
 -13  -6   1   59.60    9.00
 -13  -6   1   71.40    3.00
 -13  -6   1   69.60    3.70
  13   6  -1   62.90    9.50
  13   6  -1   57.30   10.60
  13   6  -1   70.00    2.60
  13   6  -1   64.80    2.30
 -13  -6   2   47.60    8.00
 -13  -6   2   52.70   10.80
 -13  -6   2   56.20    4.00
  13   6  -2   52.30    8.60
  13   6  -2   42.60    9.10
  13   6  -2   41.50    1.50
  13   6  -2   43.90    1.50
 -13  -6   3   63.20   11.80
  13   6  -3   67.50   10.00
  13   6  -3   56.40   10.80
 -13  -6   4   90.00   13.90
  13   6  -4   74.90   10.90
 -13  -6   5   90.70   14.50
  13   6  -5   97.30   13.10
 -13  -6   7  121.00   18.00
  13   6  -7  120.30   15.60
 -13  -6   8   34.10   10.00
  13   6  -8   34.80    7.80
 -13  -5   1   85.60   11.80
 -13  -5   1  110.20   15.40
 -13  -5   1  108.20    4.60
  13   5  -1   94.50   12.60
  13   5  -1  116.00   15.40
  13   5  -1  107.20    3.60
 -13  -5   2   47.70    7.90
 -13  -5   2   36.00    9.10
 -13  -5   2   44.60    2.60
 -13  -5   2   50.30    2.90
  13   5  -2   45.00    7.90
  13   5  -2   37.20    8.50
  13   5  -2   38.30    1.90
  13   5  -2   47.60    2.00
 -13  -5   3   62.90    9.40
 -13  -5   3   82.20    3.30
  13   5  -3   53.20   10.20
 -13  -5   4  108.30   15.40
  13   5  -4   92.40   12.50
  13   5  -4   98.80   13.70
 -13  -5   5   33.80    9.50
  13   5  -5   23.00    5.90
 -13  -5   6  153.90   20.50
  13   5  -6  156.20   18.80
 -13  -5   7    8.00    3.60
 -13  -5   7    7.10    6.80
  13   5  -7    8.40    4.60
 -13  -5   8  133.10   19.10
  13   5  -8  123.70   16.10
 -13  -4   1    6.20    3.20
 -13  -4   1    8.60    6.10
 -13  -4   1    8.50    1.50
  13   4  -1    8.70    4.10
  13   4  -1    9.30    5.40
  13   4  -1    7.20    1.30
 -13  -4   2  140.90   16.20
 -13  -4   2  149.80   19.00
 -13  -4   2  140.30    5.30
  13   4  -2  134.60   16.40
  13   4  -2  121.90   15.60
  13   4  -2  128.50    4.00
  13   4  -2  135.80    4.40
 -13  -4   3  120.30   14.10
 -13  -4   3  105.50   15.60
 -13  -4   3  121.30    6.10
 -13  -4   3  110.30    4.30
  13   4  -3  107.20   13.80
  13   4  -3  114.60   14.60
  13   4  -3   88.90    2.80
  13   4  -3  106.00    3.50
 -13  -4   4   41.10    7.10
 -13  -4   4   53.50    9.90
 -13  -4   4   30.80    5.10
 -13  -4   4   47.00    2.10
  13   4  -4   43.70    7.70
  13   4  -4   51.10    9.30
  13   4  -4   49.80    2.00
  13   4  -4   47.90    1.70
 -13  -4   5   74.80   12.50
  13   4  -5   79.30   11.10
 -13  -4   6   23.00    7.50
  13   4  -6   23.80    5.90
 -13  -4   8   27.90    9.50
  13   4  -8   24.70    6.80
 -13  -4   9  172.70   22.80
  13   4  -9  169.50   20.30
 -13  -3   1  245.00   26.80
 -13  -3   1  227.70    7.30
  13   3  -1  188.70    5.10
  13   3  -1  223.90    6.90
 -13  -3   2   15.50    4.20
 -13  -3   2   12.30    5.80
 -13  -3   2   17.00    1.90
  13   3  -2   13.70    4.50
  13   3  -2    9.90    4.90
 -13  -3   3  180.80   19.30
 -13  -3   3  180.80   21.70
 -13  -3   3  186.90    6.80
  13   3  -3  165.10   19.10
  13   3  -3  168.30   19.30
  13   3  -3  142.80    4.10
  13   3  -3  166.70    5.30
 -13  -3   4  112.60   13.40
 -13  -3   4  144.10   14.50
  13   3  -4  110.00   14.20
  13   3  -4  101.90    3.50
  13   3  -4  106.70    3.70
 -13  -3   5   23.10    7.90
 -13  -3   5   20.80    4.80
  13   3  -5   20.40    5.50
  13   3  -5   19.90    6.30
  13   3  -5   21.90    1.50
  13   3  -5   17.50    1.20
 -13  -3   6  111.40   16.20
  13   3  -6   91.20   12.40
 -13  -3   7    4.90    6.50
  13   3  -7    3.80    3.50
 -13  -3   8  138.00   19.30
  13   3  -8  146.40   17.60
 -13  -3   9   46.80   11.30
  13   3  -9   35.00    7.60
 -13  -2   1   -1.30    2.10
 -13  -2   1    1.80    4.80
 -13  -2   1    0.00    1.20
  13   2  -1    2.40    3.20
  13   2  -1   -1.60    3.70
  13   2  -1    0.30    0.70
  13   2  -1    0.90    1.00
 -13  -2   2  270.80   27.80
 -13  -2   2  273.10   30.00
 -13  -2   2  265.30    8.00
  13   2  -2  242.10   27.00
  13   2  -2  264.90   28.00
 -13  -2   3   25.70    5.50
  13   2  -3   35.40    7.20
  13   2  -3   22.60    6.20
  13   2  -3   24.20    1.90
  13   2  -3   30.50    2.30
 -13  -2   4   74.70    9.70
 -13  -2   4   76.00   12.70
 -13  -2   4   82.40    5.80
  13   2  -4   86.50   11.70
  13   2  -4   83.90   11.40
  13   2  -4   61.20    2.60
  13   2  -4   73.30    3.40
 -13  -2   5   98.90   14.50
  13   2  -5   93.00   12.40
  13   2  -5   94.00   12.30
  13   2  -5   85.40    3.50
 -13  -2   6    8.30    6.30
 -13  -2   6    6.40    4.00
  13   2  -6    7.00    3.70
  13   2  -6    9.30    4.90
  13   2  -6    5.60    1.10
  13   2  -6    6.00    1.10
 -13  -2   7  118.40   16.70
  13   2  -7   91.00   12.20
  13   2  -7   67.90    2.00
 -13  -2   8   -3.50    6.10
  13   2  -8    1.90    3.70
 -13  -2   9  102.40   16.20
  13   2  -9  105.20   14.00
 -13  -1   1  246.30   25.30
 -13  -1   1  241.10   27.30
  13   1  -1  231.30   25.50
  13   1  -1  242.70   25.30
  13   1  -1  224.50    6.10
  13   1  -1  254.20    8.10
 -13  -1   2    2.00    2.70
 -13  -1   2    4.80    6.40
 -13  -1   2   -0.50    1.10
  13   1  -2    1.60    2.90
  13   1  -2   -0.80    3.80
  13   1  -2    0.70    0.80
  13   1  -2   -0.20    1.00
 -13  -1   3  135.20   15.40
 -13  -1   3  153.70   19.30
 -13  -1   3  159.20    6.20
  13   1  -3  132.80   16.40
  13   1  -3  143.10   16.30
  13   1  -3  125.80    4.30
  13   1  -3  145.50    5.40
 -13  -1   4   56.80   12.10
 -13  -1   4   69.10    4.80
  13   1  -4   70.30   10.30
  13   1  -4   57.30    8.80
  13   1  -4   58.90    2.70
  13   1  -4   61.60    3.30
 -13  -1   5   22.90    7.50
 -13  -1   5   37.80   10.20
  13   1  -5   22.20    5.70
  13   1  -5   18.80    5.30
  13   1  -5   19.80    1.90
  13   1  -5   23.70    2.10
 -13  -1   6   98.40   14.50
 -13  -1   6   84.40   17.20
  13   1  -6   85.70   11.80
  13   1  -6   81.80   11.30
  13   1  -6   88.80    3.80
  13   1  -6   81.40    3.60
 -13  -1   7   28.00    8.80
 -13  -1   7   14.60    4.30
  13   1  -7   21.00    5.50
  13   1  -7   21.40    1.90
 -13  -1   8  109.00   17.40
 -13  -1   8   58.70    3.00
  13   1  -8  125.60   15.40
 -13  -1   9    1.30    6.10
  13   1  -9    5.90    3.80
 -13  -1  10   50.20   12.20
  13   1 -10   40.70    8.60
 -13   0   1   24.00    4.80
 -13   0   1   28.40    8.60
 -13   0   1   31.60    2.60
  13   0  -1   30.40    6.40
  13   0  -1   23.90    5.60
  13   0  -1   22.50    1.70
  13   0  -1   30.80    2.70
 -13   0   2  207.60   24.80
 -13   0   2  223.90    7.50
  13   0  -2  209.90   23.50
 -13   0   3    7.70    3.00
 -13   0   3    9.60    6.00
  13   0  -3   14.40    4.90
  13   0  -3    9.00    4.20
  13   0  -3   10.60    1.50
  13   0  -3    9.70    1.70
 -13   0   4   83.10   10.30
 -13   0   4   83.00   13.50
 -13   0   4   73.40    4.50
  13   0  -4   86.60   11.90
  13   0  -4   84.70   10.50
  13   0  -4   95.00    3.80
  13   0  -4   83.80    4.10
 -13   0   5   65.90    8.80
 -13   0   5   51.00   11.00
 -13   0   5   58.50    6.50
  13   0  -5   71.10   10.40
  13   0  -5   62.90    9.00
  13   0  -5   58.20    2.90
  13   0  -5   63.30    3.50
 -13   0   6   39.00    9.60
 -13   0   6   40.50   16.10
  13   0  -6   36.90    7.10
  13   0  -6   38.40    2.70
  13   0  -6   39.00    2.80
 -13   0   7  156.40   19.90
 -13   0   7   97.90   16.30
  13   0  -7  115.70   14.70
  13   0  -7  124.00   14.20
  13   0  -7  119.20    4.60
  13   0  -7  113.50    4.70
 -13   0   8    4.00    3.30
  13   0  -8    5.50    1.30
  13   0  -8    4.60    1.50
 -13   0   9   52.20   11.60
  13   0  -9   51.00    8.50
  13   0  -9   39.80    2.60
 -13   0  10    5.50    7.40
  13   0 -10   -0.30    3.80
 -13   1   1  132.10   14.20
 -13   1   1  113.80   16.40
 -13   1   1  146.60    5.80
  13  -1  -1  125.00   15.50
  13  -1  -1  119.60   13.50
  13  -1  -1  108.40    3.90
  13  -1  -1  120.30    5.20
 -13   1   2   -1.10    5.50
 -13   1   2    1.00    1.20
  13  -1  -2   -0.50    2.70
  13  -1  -2    0.40    0.80
  13  -1  -2    0.60    1.20
 -13   1   3  152.70   16.10
 -13   1   3  152.20   19.40
 -13   1   3  152.30    6.20
  13  -1  -3  136.20   16.80
  13  -1  -3  151.80   16.00
  13  -1  -3  115.60    4.10
 -13   1   4   52.70    7.20
 -13   1   4   42.20   10.00
 -13   1   4   53.20    3.90
  13  -1  -4   57.00    9.20
  13  -1  -4   52.50    7.50
  13  -1  -4   59.20    3.00
  13  -1  -4   55.20    3.50
 -13   1   5   79.20    9.80
 -13   1   5   73.40   13.10
 -13   1   5   71.40    5.90
  13  -1  -5   77.90   11.40
  13  -1  -5   85.80   10.40
  13  -1  -5   64.30    3.10
  13  -1  -5   82.50    4.20
 -13   1   6  120.80   16.70
  13  -1  -6  108.10   14.00
  13  -1  -6   93.50    4.40
 -13   1   7   36.10    9.80
 -13   1   7   28.60   18.80
  13  -1  -7   25.80    6.10
  13  -1  -7   28.10    5.80
  13  -1  -7   26.10    2.40
  13  -1  -7   33.60    2.80
 -13   1   8  138.80   17.10
  13  -1  -8  173.70   17.80
  13  -1  -8  138.70    5.00
  13  -1  -8  145.90    5.80
 -13   1   9    1.30    6.30
 -13   1   9   -2.30    3.20
  13  -1  -9    1.60    3.30
  13  -1  -9    0.50    1.10
  13  -1  -9    0.00    1.40
 -13   1  10   62.30   12.90
  13  -1 -10   82.70   12.20
  13  -1 -10   73.90    3.10
 -13   2   1   30.70    5.30
 -13   2   1   31.60    8.40
 -13   2   1   36.40    2.80
  13  -2  -1   33.30    7.10
  13  -2  -1   40.90    6.20
  13  -2  -1   32.80    2.10
  13  -2  -1   37.30    2.90
 -13   2   2  107.60   15.70
 -13   2   2  104.70    4.90
  13  -2  -2   86.00   12.40
  13  -2  -2   96.90   12.00
  13  -2  -2   87.70    3.50
  13  -2  -2   98.20    4.80
 -13   2   3   -0.10    2.60
 -13   2   3    3.80    6.80
 -13   2   3    0.20    1.20
  13  -2  -3    1.10    3.40
  13  -2  -3   -2.20    2.80
  13  -2  -3    1.20    0.90
  13  -2  -3    0.00    1.10
 -13   2   4  137.60   15.20
 -13   2   4  163.60   20.50
 -13   2   4  137.90    6.30
  13  -2  -4  137.60   17.40
  13  -2  -4  144.30   15.30
  13  -2  -4  139.60    4.80
  13  -2  -4  146.70    6.00
 -13   2   5   22.90    5.00
 -13   2   5   24.10    8.00
 -13   2   5   28.60    3.70
  13  -2  -5   19.60    5.60
  13  -2  -5   20.20    4.90
  13  -2  -5   28.40    2.20
  13  -2  -5   27.60    2.60
 -13   2   6  121.10   17.20
 -13   2   6  152.90   14.80
  13  -2  -6  114.50   14.90
  13  -2  -6  112.40    4.50
 -13   2   7   96.60   15.50
 -13   2   7   75.70   22.80
  13  -2  -7  113.00   14.60
  13  -2  -7  115.50   12.80
  13  -2  -7  119.20    5.10
  13  -2  -7  102.70    4.90
 -13   2   8   20.20   13.00
  13  -2  -8   19.40    4.70
  13  -2  -8   15.80    2.30
  13  -2  -8   17.70    2.30
 -13   2   9   94.50   15.70
  13  -2  -9   91.40   12.80
  13  -2  -9  102.00    4.30
  13  -2  -9   95.80    4.80
 -13   2  10    5.30    7.70
  13  -2 -10    6.30    4.70
  13  -2 -10    4.20    1.30
  13  -2 -10    5.70    1.70
 -13   3   1   89.20   10.90
 -13   3   1   78.10   13.50
 -13   3   1   92.60    4.50
  13  -3  -1   99.90   13.50
  13  -3  -1   94.20   10.20
  13  -3  -1   98.10    3.80
  13  -3  -1   96.90    4.80
 -13   3   2   30.90    5.80
 -13   3   2   32.50    9.40
  13  -3  -2   32.50    6.90
  13  -3  -2   28.20    4.90
  13  -3  -2   39.30    3.00
 -13   3   3  225.30   23.40
 -13   3   3  214.40   26.00
 -13   3   3  223.40    7.90
  13  -3  -3  201.30   23.70
  13  -3  -3  228.70   22.40
  13  -3  -3  224.60    6.80
  13  -3  -3  219.70    7.70
 -13   3   4    8.40    3.30
 -13   3   4   10.50    6.60
 -13   3   4    6.30    2.00
  13  -3  -4    8.10    4.00
  13  -3  -4    8.90    3.60
  13  -3  -4    6.10    1.40
  13  -3  -4    6.90    1.70
 -13   3   5  179.70   22.20
 -13   3   5  170.10    8.30
  13  -3  -5  158.70   19.40
  13  -3  -5  175.50   17.70
  13  -3  -5  168.40    5.50
  13  -3  -5  167.00    6.60
 -13   3   6   25.10    8.60
 -13   3   6   20.20    5.40
  13  -3  -6   13.20    4.80
  13  -3  -6   16.20    1.90
  13  -3  -6   23.30    2.60
 -13   3   7   79.20   13.60
 -13   3   7   66.10   19.20
  13  -3  -7   71.80   11.00
  13  -3  -7   79.90    9.30
  13  -3  -7   72.20    3.90
  13  -3  -7   79.80    4.40
 -13   3   8   91.20   25.60
  13  -3  -8   78.10    9.00
  13  -3  -8   65.40    3.70
  13  -3  -8   82.80    4.50
 -13   3   9   27.50    9.50
 -13   3   9    8.70   13.00
  13  -3  -9   15.90    5.40
  13  -3  -9   15.10    2.30
  13  -3  -9   19.10    2.40
 -13   3  10   58.40   12.50
 -13   3  10   46.50    9.00
  13  -3 -10   46.80    9.30
  13  -3 -10   54.00    3.10
 -13   4   1  105.50   12.20
 -13   4   1  107.30   15.80
 -13   4   1  108.10    5.10
  13  -4  -1  105.20   14.20
  13  -4  -1  103.90   10.90
  13  -4  -1   98.60    3.80
 -13   4   2  130.10   14.60
 -13   4   2  109.20   17.00
 -13   4   2  129.90    5.70
  13  -4  -2  133.40   16.80
  13  -4  -2  141.20   14.00
  13  -4  -2  131.30    4.70
  13  -4  -2  128.20    5.60
 -13   4   3    0.50    1.90
 -13   4   3    5.40    6.70
 -13   4   3    2.90    1.50
  13  -4  -3    3.80    3.40
  13  -4  -3    5.00    3.30
  13  -4  -3    2.80    1.20
  13  -4  -3    2.20    1.30
 -13   4   4  161.40   18.00
 -13   4   4  152.30   21.50
 -13   4   4  176.30    7.50
  13  -4  -4  189.20   23.50
  13  -4  -4  176.00   17.50
  13  -4  -4  180.90    5.90
  13  -4  -4  174.50    6.80
 -13   4   5   10.30    6.70
 -13   4   5    4.80    2.60
  13  -4  -5    4.70    3.90
  13  -4  -5    6.90    3.30
  13  -4  -5    2.30    1.20
  13  -4  -5    5.10    1.60
 -13   4   6  133.80   18.60
  13  -4  -6  137.60   17.30
  13  -4  -6  141.90   14.60
  13  -4  -6  155.20    6.40
 -13   4   7   48.80   10.80
 -13   4   7   50.70   16.90
  13  -4  -7   54.60    3.70
 -13   4   8   52.90   11.50
 -13   4   8   70.50   25.60
  13  -4  -8   43.90    8.20
  13  -4  -8   57.20    7.00
  13  -4  -8   45.10    3.70
  13  -4  -8   47.50    3.50
 -13   4   9   78.50   13.70
 -13   4   9   75.50   20.60
  13  -4  -9   80.50   11.80
  13  -4  -9   79.90    4.30
  13  -4  -9   78.30    4.40
 -13   4  10    8.00    8.70
 -13   4  10    1.50   10.20
  13  -4 -10    3.80    5.10
  13  -4 -10    3.50    1.60
  13  -4 -10    1.90    1.60
  13  -4 -11   63.80    3.40
  13  -4 -11   68.80    4.40
 -13   5   1    4.10    6.80
 -13   5   1    7.70    1.80
  13  -5  -1   12.20    5.00
  13  -5  -1    7.60    1.20
  13  -5  -1   10.20    1.90
 -13   5   2   76.80   10.00
 -13   5   2   77.30   13.90
 -13   5   2   91.10    4.80
  13  -5  -2   81.20   12.10
  13  -5  -2   99.00   10.00
 -13   5   3   99.30   12.00
 -13   5   3   80.10   14.60
 -13   5   3  108.60    5.40
  13  -5  -3  106.70   14.40
  13  -5  -3  108.90   11.10
  13  -5  -3  109.60    4.30
  13  -5  -3  106.50    5.10
 -13   5   4    2.80    2.40
 -13   5   4    4.80    1.90
  13  -5  -4    2.40    3.10
  13  -5  -4    3.00    1.10
  13  -5  -4    1.80    1.40
 -13   5   5  123.10   17.50
  13  -5  -5  136.90   17.00
  13  -5  -5  114.70   12.60
  13  -5  -5  129.80    4.70
  13  -5  -5  140.50    6.30
 -13   5   6   13.00    7.30
 -13   5   6   11.90    4.20
  13  -5  -6   19.40    5.70
  13  -5  -6   12.20    3.20
 -13   5   7   68.60   13.00
 -13   5   7   70.50   15.80
  13  -5  -7   52.20    9.00
  13  -5  -7   49.70    6.30
  13  -5  -7   52.80    3.30
 -13   5   8   43.00   10.70
 -13   5   8   57.50   23.90
  13  -5  -8   43.10    3.20
 -13   5   9   12.90    7.10
 -13   5   9   -0.20   17.80
  13  -5  -9   11.40    4.50
  13  -5  -9   12.10    2.20
  13  -5  -9   11.20    2.20
 -13   5  10   62.70   18.30
  13  -5 -10   85.50    4.50
  13  -5 -10   83.00    4.70
  13  -5 -11    1.40    1.60
  13  -5 -11    0.50    1.50
 -13   6   1   75.30    9.90
 -13   6   1   63.40   12.90
  13  -6  -1   72.30    4.10
 -13   6   2  105.50   12.40
 -13   6   2  108.20   17.30
 -13   6   2  114.30    5.50
  13  -6  -2  112.00   14.80
  13  -6  -2  103.60   10.20
  13  -6  -2   92.30    3.80
  13  -6  -2  106.20    5.10
 -13   6   3   18.50    4.50
 -13   6   3   23.60    9.10
 -13   6   3   29.20    3.00
  13  -6  -3   23.50    6.10
  13  -6  -3   24.40    4.10
  13  -6  -3   21.90    2.00
  13  -6  -3   29.70    2.80
 -13   6   4   89.90   15.20
 -13   6   4  119.30    6.40
  13  -6  -4  111.20   14.70
  13  -6  -4  101.80   10.30
  13  -6  -4   84.60    3.60
  13  -6  -4  103.50    5.10
 -13   6   5   -1.70    7.00
 -13   6   5    4.10    2.40
  13  -6  -5    3.10    3.80
  13  -6  -5    1.40    2.80
  13  -6  -5    1.60    1.10
  13  -6  -5    2.90    1.50
 -13   6   6   75.00   13.80
 -13   6   6  111.30    8.60
  13  -6  -6   89.40   12.80
  13  -6  -6   93.10    9.50
 -13   6   7   24.00   10.10
  13  -6  -7   14.60    3.70
  13  -6  -7    7.50    1.70
  13  -6  -7   12.20    2.10
 -13   6   8   22.80    8.40
 -13   6   8   14.50   16.00
  13  -6  -8   23.50    6.10
  13  -6  -8   21.30    2.40
  13  -6  -8   25.10    2.80
 -13   6   9   47.70   11.00
 -13   6   9   50.40   23.20
  13  -6  -9   58.80    3.70
  13  -6  -9   56.60    3.90
 -13   6  10   24.70   17.40
  13  -6 -10   19.10    2.60
  13  -6 -10   19.00    2.60
 -13   6  11   53.60   12.10
  13  -6 -11   80.00    4.30
  13  -6 -11   75.30    4.60
 -13   7   1   19.20    9.70
 -13   7   1   39.70    3.30
  13  -7  -1   36.00    7.90
  13  -7  -1   33.70    4.40
  13  -7  -1   37.00    2.40
  13  -7  -1   40.30    3.40
 -13   7   2   71.60   14.60
 -13   7   2   94.40    5.10
  13  -7  -2   90.00   12.80
  13  -7  -2   77.80    8.00
  13  -7  -2   62.10    3.10
 -13   7   3   85.70   11.40
 -13   7   3  101.40    5.60
  13  -7  -3   74.60   12.80
  13  -7  -3   91.80    9.40
  13  -7  -3  103.80    4.20
  13  -7  -3   89.00    4.70
 -13   7   4   15.60    8.20
 -13   7   4   16.70    3.00
  13  -7  -4   10.20    4.40
  13  -7  -4    9.00    3.40
  13  -7  -4   10.70    1.60
  13  -7  -4   14.00    2.20
 -13   7   5  179.90   23.20
 -13   7   5  201.10    9.80
  13  -7  -5  160.40   19.60
  13  -7  -5  169.80   16.30
  13  -7  -5  160.20    5.40
  13  -7  -5  157.00    6.40
 -13   7   6   -1.40    6.70
 -13   7   6    3.00    3.50
  13  -7  -6    2.50    3.20
  13  -7  -6    2.00    2.70
  13  -7  -6    2.90    1.20
  13  -7  -6    3.10    1.50
 -13   7   7   73.20   13.40
 -13   7   7   63.20   11.70
  13  -7  -7   67.40   10.50
  13  -7  -7   74.80    7.70
  13  -7  -7   69.60    3.70
  13  -7  -7   74.90    4.40
 -13   7   8   17.90    7.30
 -13   7   8    8.70   15.90
  13  -7  -8   23.10    6.00
  13  -7  -8   21.70    2.50
  13  -7  -8   21.80    2.60
 -13   7   9   22.60    7.80
 -13   7   9   34.80   22.20
  13  -7  -9   28.90    6.70
  13  -7  -9   20.30    2.60
  13  -7  -9   29.10    3.00
 -13   7  10   37.70   17.90
  13  -7 -10   43.80    3.40
  13  -7 -10   33.20    3.20
 -13   7  11    6.00    7.50
  13  -7 -11   17.80    2.50
  13  -7 -11   10.70    2.20
 -13   8   1   88.50    4.90
  13  -8  -1   81.80   12.10
  13  -8  -1   78.70    7.80
  13  -8  -1   70.80    3.30
  13  -8  -1   81.40    4.40
 -13   8   2   68.40    4.50
  13  -8  -2   56.70    6.30
 -13   8   3   26.90   10.30
 -13   8   3   21.50    3.10
  13  -8  -3   11.00    4.40
  13  -8  -3   14.40    3.10
 -13   8   4   46.20   11.80
 -13   8   4   66.70    5.10
  13  -8  -4   62.40   10.00
  13  -8  -4   60.40    6.50
  13  -8  -4   67.90    3.30
  13  -8  -4   59.30    3.80
 -13   8   5    2.70    7.00
 -13   8   5    3.70    2.70
  13  -8  -5    3.90    3.70
  13  -8  -5    3.00    2.80
  13  -8  -5    4.60    1.30
  13  -8  -5    4.80    1.60
 -13   8   6  105.70    9.00
  13  -8  -6  105.80   10.50
  13  -8  -6   90.30    3.90
  13  -8  -6  101.10    5.00
 -13   8   7    4.20    6.70
 -13   8   7    1.40    6.40
  13  -8  -7    0.40    2.70
  13  -8  -7    2.50    1.30
  13  -8  -7    1.40    1.40
 -13   8   8   53.20   11.10
 -13   8   8   54.00   17.50
  13  -8  -8   50.30    9.00
 -13   8   9   33.00   19.50
  13  -8  -9   15.40    2.50
  13  -8  -9   21.40    2.60
  13  -8 -10   17.00    2.60
  13  -8 -10   16.40    2.40
  13  -8 -11   45.40    4.00
  13  -8 -11   47.10    4.00
 -13   9   1    2.70    8.60
 -13   9   1    8.80    1.90
  13  -9  -1    9.60    4.60
  13  -9  -1   10.10    3.20
  13  -9  -1   12.60    1.60
  13  -9  -1   10.50    2.10
 -13   9   2   39.20   11.80
 -13   9   2   56.80    4.20
  13  -9  -2   46.90    9.00
  13  -9  -2   50.50    5.60
  13  -9  -2   39.70    2.50
  13  -9  -2   46.30    3.30
 -13   9   3   41.80   12.10
 -13   9   3   63.70    5.00
  13  -9  -3   46.70    9.30
  13  -9  -3   49.00    5.80
  13  -9  -3   57.50    3.10
  13  -9  -3   48.50    3.30
 -13   9   4   30.30   11.20
  13  -9  -4   34.20    7.60
  13  -9  -4   29.60    4.10
  13  -9  -4   30.40    2.70
  13  -9  -5   70.10    7.30
  13  -9  -5   69.00    4.00
 -13   9   6    4.30    7.40
  13  -9  -6    4.70    3.50
  13  -9  -6    5.00    3.00
  13  -9  -6    7.60    1.80
 -13   9   7   49.40   11.50
  13  -9  -7   69.40   10.60
 -13   9   8   -1.70    6.40
  13  -9  -8    2.30    3.90
  13  -9  -8    8.80    1.90
  13  -9  -9   25.60    3.10
  13  -9  -9   32.10    3.00
 -13   9  10   18.90    8.60
  13  -9 -10   29.60    3.30
  13  -9 -10   35.70    3.40
 -13   9  11   -0.30    5.30
  13  -9 -11   12.50    2.60
  13  -9 -11    9.20    2.20
 -13  10   1   30.00   10.60
 -13  10   1   39.60    3.40
  13 -10  -1   37.70    8.10
  13 -10  -1   35.50    5.10
  13 -10  -1   48.10    2.90
 -13  10   2    7.50    7.30
 -13  10   2   23.70    3.00
  13 -10  -2   20.80    6.20
  13 -10  -2   18.00    4.00
  13 -10  -2   26.00    2.10
 -13  10   3   29.40    9.90
 -13  10   3   29.20    3.70
  13 -10  -3   24.20    6.60
  13 -10  -3   27.20    4.30
  13 -10  -3   37.90    2.50
 -13  10   4   14.20    9.00
 -13  10   4   36.40    4.20
  13 -10  -4   26.90    8.30
  13 -10  -4   31.80    4.80
  13 -10  -4   22.20    2.10
 -13  10   5   28.60    9.50
 -13  10   5   29.80    4.80
  13 -10  -5   33.30    7.40
  13 -10  -5   33.80    5.00
  13 -10  -5   25.60    2.30
 -13  10   6   53.70   12.00
 -13  10   6   73.40    7.70
  13 -10  -6   68.40   11.00
  13 -10  -6   66.00    3.60
 -13  10   7    1.80    5.50
 -13  10   7    2.10    5.20
  13 -10  -7    3.40    3.20
  13 -10  -7    2.40    1.40
 -13  10   8   37.10   12.20
  13 -10  -8   46.80    3.50
 -13  10   9    3.10    4.80
  13 -10  -9    5.10    2.10
 -13  10  10   16.40    7.30
  13 -10 -10   61.10    4.20
 -13  11   1    8.50    7.20
  13 -11  -1    9.60    4.60
  13 -11  -1    9.90    4.30
 -13  11   2   33.70   10.00
  13 -11  -2   45.70    9.10
  13 -11  -2   45.80    6.40
  13 -11  -3   16.60    4.20
 -13  11   4   36.70    9.20
  13 -11  -4   34.10    7.20
  13 -11  -4   37.50    6.00
 -13  11   5   40.80    9.60
  13 -11  -5   43.60    8.40
 -13  11   6    7.30    5.50
  13 -11  -6    5.00    4.70
  13 -12  -1   61.00   11.60
  13 -12  -1   59.50    8.40
  13 -12  -2   10.90    5.40
  13 -12  -2   16.00    5.20
 -13  12   3   42.20    9.20
  13 -12  -3   51.10    9.60
 -13  12   4    7.10    5.50
  13 -12  -4    8.20    4.40
 -13  12   5   16.20    7.10
  12  15  -1  125.50   13.90
  12  14  -1    7.70    3.70
  12  14  -2   78.70   10.00
  12  14  -3   14.10    5.00
 -12 -13   1   87.00   12.60
  12  13  -1   94.00   11.30
 -12 -13   2    0.50    2.60
  12  13  -2    1.00    3.20
  12  13  -3   69.30    9.50
  12  13  -4    6.80    3.90
 -12 -12   1   22.60    6.20
  12  12  -1   30.40    6.20
 -12 -12   2   88.60   12.60
  12  12  -2   87.70   11.00
 -12 -12   3    9.40    4.20
  12  12  -3   10.10    4.30
  12  12  -4  139.70   16.20
  12  12  -5   15.30    4.90
  12  11  -1  133.30   15.40
 -12 -11   2    6.20    4.10
  12  11  -2    5.30    3.70
 -12 -11   3  146.80   18.00
  12  11  -3  136.30   16.00
 -12 -11   4    3.20    3.60
  12  11  -4    3.90    4.30
  12  11  -5  151.00   17.80
  12  11  -6   25.30    6.50
  12  10  -2  106.10   13.40
 -12 -10   3   24.80    6.20
  12  10  -3   15.90    5.30
 -12 -10   4  173.20   20.50
  12  10  -4  172.10   20.00
 -12 -10   5    9.70    4.20
  12  10  -5    9.50    4.80
  12  10  -6   52.30    9.20
  12  10  -7   24.00    6.40
  12   9  -1  144.40   16.90
  12   9  -3  151.50   18.00
 -12  -9   4   10.30    4.70
  12   9  -4    9.10    4.70
 -12  -9   5  113.00   14.70
  12   9  -5  126.20   15.80
 -12  -9   6   22.00    5.60
  12   9  -6   18.10    5.80
  12   9  -7   40.20    8.10
 -12  -8   1   63.60    9.90
  12   8  -1   70.80   10.00
  12   8  -1   72.00   12.10
  12   8  -2  111.50   14.10
 -12  -8   4  145.40   17.60
  12   8  -4  133.00   16.40
 -12  -8   5    6.40    3.40
  12   8  -5   13.90    5.10
 -12  -8   6  176.40   20.20
  12   8  -6  174.80   20.80
 -12  -8   7   27.50    6.50
  12   8  -7   33.90    7.50
  12   8  -8   38.90    7.90
 -12  -7   1   93.80   12.50
  12   7  -1   88.00   11.60
  12   7  -1   78.90   12.20
  12   7  -1   84.80    2.30
  12   7  -1   89.00    2.50
 -12  -7   2   71.80   10.80
  12   7  -2   74.20   10.60
  12   7  -2   71.00   11.70
  12   7  -3  157.50   18.40
  12   7  -4   11.20    4.80
  12   7  -5  103.10   13.70
 -12  -7   6    4.90    3.50
  12   7  -6    2.50    3.70
 -12  -7   7   93.80   12.20
  12   7  -8   19.60    6.00
  12   7  -9   47.40    9.00
 -12  -6   1  130.70   15.90
 -12  -6   1  147.40   18.30
 -12  -6   1  137.60    4.20
 -12  -6   1  137.20    5.10
  12   6  -1  125.30   15.40
  12   6  -1  129.40   16.50
  12   6  -1  136.30    3.80
  12   6  -1  125.20    3.40
 -12  -6   2   82.60   11.20
 -12  -6   2   84.10   12.70
  12   6  -2   75.50   10.60
  12   6  -2   77.50   11.80
  12   6  -2   74.80    2.00
 -12  -6   3  135.30   16.50
 -12  -6   3  136.70   17.60
  12   6  -3  143.70   16.80
  12   6  -3  145.60   18.10
 -12  -6   4  187.30   22.80
  12   6  -4  190.40   21.70
 -12  -6   5   18.60    7.00
  12   6  -5   15.80    5.20
 -12  -6   6   66.10   10.00
 -12  -6   6   71.20   12.60
  12   6  -6   76.50   11.40
 -12  -6   7    1.10    2.80
 -12  -6   7   -0.20    5.60
  12   6  -7    0.60    3.40
 -12  -6   8   90.30   11.60
 -12  -6   8   89.00   15.00
  12   6  -8   82.60   11.90
 -12  -6   9   39.80   10.50
  12   6  -9   33.10    7.30
 -12  -5   1   36.50    6.50
 -12  -5   1   31.60    7.90
  12   5  -1   26.50    6.00
  12   5  -1   41.20    8.10
 -12  -5   2   91.20   13.30
 -12  -5   2   85.20    3.30
 -12  -5   2   85.00    3.50
  12   5  -2   85.10   11.70
  12   5  -2   83.60    2.80
  12   5  -2   89.60    2.90
 -12  -5   3   53.30    8.30
 -12  -5   3   55.20   10.20
  12   5  -3   65.10    9.60
  12   5  -3   57.00   10.20
 -12  -5   4  133.30   17.30
  12   5  -4  122.30   15.40
 -12  -5   6   11.00    6.50
  12   5  -6    6.00    4.20
 -12  -5   7   39.50    7.00
 -12  -5   7   50.40   10.80
  12   5  -7   44.80    8.40
 -12  -5   8    9.30    3.70
 -12  -5   8    3.90    7.00
  12   5  -8   10.20    5.10
 -12  -5   9  116.60   17.80
  12   5  -9  110.70   14.70
 -12  -5  10   74.70   13.80
  12   5 -10   67.90   10.60
 -12  -4   1  268.20   28.40
 -12  -4   1  273.80    7.60
  12   4  -1  273.20   29.10
 -12  -4   2   28.90    5.70
 -12  -4   2   31.40    7.90
 -12  -4   2   32.00    2.10
  12   4  -2   38.00    7.10
  12   4  -2   32.00    7.50
  12   4  -2   40.50    1.90
  12   4  -2   33.20    1.90
 -12  -4   3  112.60   13.60
 -12  -4   3  108.30   14.70
 -12  -4   3  115.60    5.20
 -12  -4   3  111.50    4.00
  12   4  -3   97.90   12.80
  12   4  -3  102.70   14.00
  12   4  -3   92.20    2.80
  12   4  -3  105.40    3.30
 -12  -4   4   71.90    9.90
 -12  -4   4   78.00   12.10
 -12  -4   4   70.40    2.40
  12   4  -4   69.10   10.00
  12   4  -4   74.20   11.20
  12   4  -4   74.90    2.30
  12   4  -4   64.90    1.80
 -12  -4   5   69.90   11.70
  12   4  -5   55.80    8.80
 -12  -4   6  141.60   18.50
  12   4  -6  141.30   17.00
 -12  -4   7    1.10    2.70
 -12  -4   7    1.20    5.30
  12   4  -7    3.20    3.50
 -12  -4   8  100.70   12.30
 -12  -4   8  114.70   16.00
  12   4  -8   83.60   12.00
 -12  -4   9   37.90    6.30
 -12  -4   9   36.40   10.60
  12   4  -9   34.90    6.90
  12   4 -10   56.90    9.60
 -12  -3   1    2.00    2.70
 -12  -3   1    0.20    5.30
 -12  -3   1    3.90    1.20
  12   3  -1    3.80    3.40
  12   3  -1    4.10    4.50
  12   3  -1    2.40    0.70
 -12  -3   2  303.20   31.90
 -12  -3   2  336.00   35.30
 -12  -3   2  331.90    9.00
  12   3  -2  306.70   32.70
  12   3  -2  334.50   34.20
  12   3  -2  322.30    7.90
  12   3  -2  314.50    8.30
 -12  -3   3   68.20   11.20
 -12  -3   3   78.30    3.80
  12   3  -3   66.90    9.90
  12   3  -3   70.40    3.00
 -12  -3   4  136.80   15.40
 -12  -3   4  146.50   17.90
 -12  -3   4  173.90   13.70
  12   3  -4  123.20   15.00
  12   3  -4  125.00   15.20
  12   3  -4  105.40    3.30
  12   3  -4  119.40    3.80
 -12  -3   5  110.70   13.30
 -12  -3   5  110.70   15.40
 -12  -3   5   89.20    6.60
 -12  -3   5   99.10    3.50
  12   3  -5   96.80   12.90
  12   3  -5   95.70   12.80
  12   3  -5  109.90    3.30
 -12  -3   6   62.70   12.00
  12   3  -6   63.10    9.80
 -12  -3   7  163.50   20.50
  12   3  -7  162.90   19.20
 -12  -3   8   16.40    4.40
 -12  -3   8   23.30    7.70
  12   3  -8   23.40    5.90
 -12  -3   9   75.60   10.00
 -12  -3  10   25.20    8.70
  12   3 -10   34.10    7.10
 -12  -3  11   51.90   11.60
  12   3 -11   53.40    9.20
 -12  -2   1  243.80   24.90
 -12  -2   1  237.30   26.10
 -12  -2   1  222.00    6.80
  12   2  -1  231.30   25.10
  12   2  -1  235.80   24.80
  12   2  -1  219.60    5.90
  12   2  -1  229.70    7.00
 -12  -2   2    3.40    1.10
  12   2  -2    4.90    3.70
  12   2  -2    3.00    4.30
  12   2  -2    1.50    0.70
  12   2  -2    2.90    1.10
 -12  -2   3  317.30   32.00
 -12  -2   3  321.50   34.00
  12   2  -3  291.50   31.40
  12   2  -3  330.60   33.00
  12   2  -3  293.00    7.30
  12   2  -3  305.50    8.30
 -12  -2   4  112.50   13.20
 -12  -2   4   98.50   14.10
 -12  -2   4  114.70    6.40
  12   2  -4  104.10   13.40
  12   2  -4  117.80   13.90
  12   2  -4   88.20    3.10
  12   2  -4  105.10    4.10
 -12  -2   5   43.60    6.90
 -12  -2   5   41.30    9.00
 -12  -2   5   38.30   12.50
  12   2  -5   38.40    7.10
  12   2  -5   32.40    6.70
  12   2  -5   40.30    2.20
  12   2  -5   41.90    2.30
 -12  -2   6  110.50   13.20
 -12  -2   6   92.70    6.90
  12   2  -6  114.90   14.00
  12   2  -6  114.90    3.50
  12   2  -6  103.40    3.40
 -12  -2   7   12.80    6.50
  12   2  -7    9.70    4.20
 -12  -2   8  216.70   25.50
  12   2  -8  197.50   22.70
 -12  -2   9   15.90    4.20
 -12  -2   9   16.20    7.10
  12   2  -9   16.60    5.10
 -12  -2  10   61.90   12.20
  12   2 -10   67.70   10.30
 -12  -2  11   14.10    7.50
  12   2 -11   12.80    4.90
 -12  -1   1    7.20    3.10
 -12  -1   1    7.50    6.20
 -12  -1   1    9.50    1.60
  12   1  -1   10.40    4.20
  12   1  -1    8.60    4.30
  12   1  -1    6.10    1.00
  12   1  -1   10.30    1.60
 -12  -1   2  258.90   26.70
 -12  -1   2  261.50    7.80
  12   1  -2  263.70   27.10
  12   1  -2  238.70    6.20
  12   1  -2  268.70    8.10
 -12  -1   3    5.00    4.90
 -12  -1   3    4.00    1.30
  12   1  -3    4.70    3.30
  12   1  -3    4.10    4.00
  12   1  -3    5.70    1.00
  12   1  -3    6.20    1.30
 -12  -1   4  131.40   15.20
 -12  -1   4  156.10   18.90
 -12  -1   4  156.50    6.70
  12   1  -4  130.70   16.20
  12   1  -4  139.40   16.10
 -12  -1   5  101.30   12.10
 -12  -1   5   97.50   14.00
  12   1  -5   90.40   12.30
  12   1  -5   94.70   11.90
  12   1  -5   92.90    3.40
  12   1  -5  102.70    4.20
 -12  -1   6   17.70    4.40
 -12  -1   6   19.60    7.00
  12   1  -6   17.80    5.30
  12   1  -6   17.30    5.00
  12   1  -6   16.90    1.70
  12   1  -6   19.00    1.80
 -12  -1   7   91.30   13.80
  12   1  -7   98.60   12.90
  12   1  -7   91.00    3.20
  12   1  -7   93.40    3.60
 -12  -1   8   19.60    7.40
  12   1  -8   22.90    5.70
 -12  -1   9  147.30   19.70
  12   1  -9  140.00   17.20
 -12  -1  10   16.70    4.20
 -12  -1  10    9.70    7.10
  12   1 -10   14.50    5.00
 -12  -1  11   52.00   11.10
  12   1 -11   69.10   10.50
 -12   0   1  295.40   29.50
 -12   0   1  292.30   31.40
  12   0  -1  275.80   29.70
  12   0  -1  323.40   31.00
  12   0  -1  268.80    8.10
 -12   0   2    3.20    2.70
 -12   0   2    5.40    1.40
  12   0  -2    3.30    3.40
  12   0  -2    3.90    0.90
  12   0  -2    8.00    1.50
 -12   0   3  121.60   14.00
 -12   0   3  121.80   16.10
 -12   0   3  123.70    5.00
  12   0  -3  133.00   16.10
  12   0  -3  127.60   14.30
  12   0  -3  118.20    4.00
  12   0  -3  126.90    5.00
 -12   0   4    7.80    3.90
 -12   0   4    8.90    6.10
 -12   0   4    8.00    1.80
  12   0  -4    6.50    3.80
  12   0  -4    5.90    4.10
  12   0  -4    7.80    1.20
  12   0  -4    9.00    1.60
 -12   0   5   67.30    8.90
 -12   0   5   73.60   12.00
 -12   0   5   74.50    6.20
  12   0  -5   62.20    9.80
  12   0  -5   81.10   10.10
  12   0  -5   73.40    3.20
  12   0  -5   70.50    3.60
 -12   0   6   78.80    9.90
 -12   0   6   74.20   12.50
 -12   0   6   77.30   16.90
  12   0  -6   78.50   11.30
  12   0  -6   77.00    9.90
  12   0  -6   84.70    3.70
  12   0  -6   84.60    4.00
 -12   0   7   24.00    7.80
 -12   0   7   23.60    9.70
  12   0  -7   21.90    5.50
  12   0  -7   30.00    5.90
  12   0  -7   33.40    2.40
 -12   0   8  185.90   22.50
  12   0  -8  157.70   19.00
  12   0  -8  166.40    4.90
  12   0  -8  172.50    5.80
 -12   0   9    5.70    5.70
 -12   0   9    0.90    1.50
  12   0  -9    6.30    3.90
  12   0  -9    4.40    1.10
  12   0  -9    3.00    1.30
 -12   0  10  125.00   13.70
 -12   0  10  139.70   18.60
  12   0 -10  112.70   14.70
  12   0 -10  116.90    3.60
  12   0 -10  103.30    3.60
 -12   0  11   24.50    8.60
  12   0 -11   30.70    7.10
 -12   1   1   38.30    5.80
 -12   1   1   33.30    8.30
 -12   1   1   39.90    2.70
  12  -1  -1   37.10    7.30
  12  -1  -1   36.00    5.90
  12  -1  -1   32.90    2.00
  12  -1  -1   38.90    2.80
 -12   1   2  318.90   31.20
 -12   1   2  316.60    9.30
  12  -1  -2  299.70   29.70
  12  -1  -2  281.80    7.30
  12  -1  -2  291.90    8.80
 -12   1   3    8.30    3.30
 -12   1   3    7.30    5.40
  12  -1  -3    4.60    3.70
  12  -1  -3    4.80    3.40
  12  -1  -3    5.20    1.10
  12  -1  -3    6.00    1.40
 -12   1   4   92.30   13.50
 -12   1   4   77.00    4.30
  12  -1  -4   71.50   10.80
  12  -1  -4   81.20    4.00
 -12   1   5   32.50    3.80
  12  -1  -5   27.10    6.30
  12  -1  -5   28.10    5.40
  12  -1  -5   22.90    1.80
  12  -1  -5   30.10    2.50
 -12   1   6   77.80    9.80
 -12   1   6   96.30   14.30
 -12   1   6  105.90   14.20
  12  -1  -6   82.50   11.90
  12  -1  -6   83.90   10.30
  12  -1  -6   92.40    3.90
  12  -1  -6   89.90    4.30
 -12   1   7  105.20   15.30
 -12   1   7  108.80   22.20
  12  -1  -7  113.00   14.60
  12  -1  -7  106.80   12.30
  12  -1  -7   99.30    4.20
  12  -1  -7  104.30    4.60
 -12   1   8   36.30    9.10
 -12   1   8   25.90    9.90
  12  -1  -8   38.30    7.40
  12  -1  -8   34.60    2.50
  12  -1  -8   33.00    2.60
 -12   1   9  183.20   22.60
 -12   1   9  126.10    8.40
  12  -1  -9  176.80   20.50
  12  -1  -9  175.20    5.40
  12  -1  -9  170.50    6.10
 -12   1  10    7.30    6.60
 -12   1  10    2.40    2.00
  12  -1 -10    9.30    4.50
  12  -1 -10    9.30    1.40
  12  -1 -10    9.70    1.90
 -12   1  11  116.40   17.10
  12  -1 -11  110.60   14.40
  12  -1 -11   88.00    3.90
 -12   2   1  143.80   15.20
 -12   2   1  133.00   17.10
 -12   2   1  132.00    5.20
  12  -2  -1  134.30   16.50
  12  -2  -1  134.00   14.10
  12  -2  -1  134.00    4.50
  12  -2  -1  127.00    5.30
 -12   2   2   30.00    5.20
 -12   2   2   27.20    2.40
  12  -2  -2   26.70    5.10
  12  -2  -2   22.70    1.70
 -12   2   3  188.40   19.60
 -12   2   3  190.10   22.10
 -12   2   3  201.90    7.10
  12  -2  -3  180.60   20.90
  12  -2  -3  179.50   18.40
  12  -2  -3  162.40    5.00
 -12   2   4    2.50    3.00
 -12   2   4    6.50    5.50
 -12   2   4    6.00    1.70
  12  -2  -4    3.90    1.20
  12  -2  -4    2.80    1.30
 -12   2   5  104.60   12.10
 -12   2   5   97.00   14.20
 -12   2   5  103.00    5.90
  12  -2  -5   99.20   13.40
  12  -2  -5  110.80   12.10
  12  -2  -5  108.80    4.10
  12  -2  -5  106.40    4.80
 -12   2   6   55.60    7.50
 -12   2   6   40.30    9.80
 -12   2   6   51.30    7.60
  12  -2  -6   46.90    8.30
  12  -2  -6   50.80    7.00
  12  -2  -6   44.50    2.70
  12  -2  -6   51.50    3.30
 -12   2   7  156.20   19.40
  12  -2  -7  144.30   17.60
  12  -2  -7  132.30   14.40
  12  -2  -7  129.70    5.30
 -12   2   8  170.10   21.50
  12  -2  -8  166.10   19.70
  12  -2  -8  163.50   17.30
  12  -2  -8  158.90    6.00
 -12   2   9   17.20    7.30
 -12   2   9   22.50    8.20
  12  -2  -9    6.20    3.70
  12  -2  -9    8.10    1.60
  12  -2  -9    7.30    1.70
 -12   2  10   97.40   15.30
  12  -2 -10   95.80   13.40
  12  -2 -10   95.40    3.70
  12  -2 -10   91.70    4.50
 -12   2  11   15.90    8.30
 -12   2  11    5.80    2.60
  12  -2 -11   12.30    5.00
  12  -2 -11   11.50    1.60
  12  -2 -11   11.50    2.00
 -12   3   1   34.30    5.70
 -12   3   1   29.30    7.70
 -12   3   1   37.40    2.80
  12  -3  -1   29.90    6.60
  12  -3  -1   33.30    5.10
  12  -3  -1   24.20    1.80
  12  -3  -1   32.80    2.70
 -12   3   2  129.50   14.40
 -12   3   2  122.30    5.10
  12  -3  -2  124.90   13.10
  12  -3  -2  143.10    4.80
  12  -3  -2  120.00    5.20
 -12   3   3    7.20    3.10
 -12   3   3   13.70    6.40
 -12   3   3   10.80    1.80
  12  -3  -3    9.10    4.40
  12  -3  -3    5.50    3.20
  12  -3  -3    5.50    1.10
  12  -3  -3    9.50    1.70
 -12   3   4  218.20   22.80
 -12   3   4  228.90   25.80
 -12   3   4  215.00    7.80
  12  -3  -4  209.50   24.10
  12  -3  -4  220.90   21.70
  12  -3  -4  202.90    6.00
  12  -3  -4  222.80    7.70
 -12   3   5    3.50    2.70
 -12   3   5    4.20    4.80
 -12   3   5    9.10    2.30
  12  -3  -5    5.20    1.20
  12  -3  -5    7.30    1.60
 -12   3   6  109.20   12.80
 -12   3   6  112.30   15.80
 -12   3   6  116.30    8.50
  12  -3  -6  102.50   14.00
  12  -3  -6  112.30   11.80
  12  -3  -6   99.90    4.00
 -12   3   7   37.10    9.30
 -12   3   7   41.50   12.80
  12  -3  -7   35.20    7.30
  12  -3  -7   35.50    5.70
  12  -3  -7   33.30    2.60
 -12   3   8   94.90   14.30
 -12   3   8   72.90   22.90
  12  -3  -8   78.40   11.60
  12  -3  -8   98.00   10.70
  12  -3  -8   81.60    4.10
  12  -3  -8   90.40    4.70
 -12   3   9  145.80   18.80
 -12   3   9  143.50   20.50
  12  -3  -9  111.60   15.00
  12  -3  -9  129.40   13.60
  12  -3  -9  119.10    5.00
  12  -3  -9  128.10    5.60
 -12   3  10    0.30    5.70
 -12   3  10    2.60    5.10
  12  -3 -10    1.80    3.30
  12  -3 -10    4.10    1.40
  12  -3 -10    6.00    1.80
 -12   3  11  110.50   17.20
 -12   3  11   83.90    7.00
  12  -3 -11  101.30   13.90
  12  -3 -11  114.80    4.30
  12  -3 -11  110.30    5.30
  12  -3 -12   28.50    2.30
  12  -3 -12   22.40    2.60
 -12   4   1   70.90    8.90
 -12   4   1   63.20   11.00
  12  -4  -1   77.10   11.20
  12  -4  -1   70.40    7.70
  12  -4  -1   73.50    4.10
 -12   4   2   45.50    6.50
 -12   4   2   35.10    8.70
 -12   4   2   46.70    3.20
  12  -4  -2   44.10    8.30
  12  -4  -2   41.00    5.40
  12  -4  -2   37.00    2.30
  12  -4  -2   47.90    3.30
 -12   4   3   97.20   11.70
 -12   4   3  101.80   14.70
 -12   4   3   89.80    4.40
  12  -4  -3  107.20   14.20
  12  -4  -3  102.00   10.70
  12  -4  -3  123.40    4.60
  12  -4  -3  106.20    4.90
 -12   4   4   10.10    3.50
 -12   4   4    7.80    5.60
 -12   4   4   13.30    2.20
  12  -4  -4    6.00    4.00
  12  -4  -4   10.00    3.30
  12  -4  -4    9.10    1.40
  12  -4  -4    8.20    1.70
 -12   4   5  218.90   22.70
 -12   4   5  232.20   26.00
 -12   4   5  239.30    9.40
  12  -4  -5  214.80   24.30
  12  -4  -5  208.90   20.60
  12  -4  -5  187.90    5.70
  12  -4  -5  215.70    7.60
 -12   4   6   24.40    5.10
 -12   4   6   22.70    4.30
  12  -4  -6   10.90    3.40
  12  -4  -6   18.80    1.90
  12  -4  -6   21.60    2.40
 -12   4   7  125.00   16.10
  12  -4  -7  111.40   14.60
  12  -4  -7  108.50   11.40
  12  -4  -7   95.60    4.30
  12  -4  -7  105.00    5.10
 -12   4   8   77.40   13.40
 -12   4   8   65.60   23.70
  12  -4  -8   91.80   12.60
  12  -4  -8   91.90   10.00
  12  -4  -8   93.20    4.50
  12  -4  -8   91.80    4.70
 -12   4   9   25.30    8.00
 -12   4   9   33.00   17.20
  12  -4  -9   16.60    5.10
  12  -4  -9   18.50    3.90
  12  -4  -9   16.60    2.30
  12  -4  -9   17.80    2.40
 -12   4  10   78.20   14.00
 -12   4  10  117.20   18.10
  12  -4 -10   93.40   12.90
  12  -4 -10   82.90    3.90
  12  -4 -10   95.50    4.90
 -12   4  11    9.70    7.00
 -12   4  11   -1.00    4.30
  12  -4 -11    2.00    4.10
  12  -4 -11    0.60    1.20
  12  -4 -11   -0.80    1.20
  12  -4 -12   78.00    3.50
  12  -4 -12   78.70    4.50
 -12   5   1  107.50   12.50
 -12   5   1  121.20   16.80
 -12   5   1  123.00    5.30
  12  -5  -1  116.90   11.50
  12  -5  -1  107.60    4.00
  12  -5  -1  117.40    5.40
 -12   5   2   95.20   11.00
 -12   5   2   96.50   14.00
 -12   5   2   88.10    4.40
  12  -5  -2   91.70   12.80
  12  -5  -2   94.20    9.50
  12  -5  -2   87.60    3.60
  12  -5  -2   92.30    4.60
 -12   5   3   26.30    8.20
 -12   5   3   33.80    2.90
  12  -5  -3   29.40    6.60
 -12   5   4  137.60   15.00
 -12   5   4  137.10   18.00
 -12   5   4  130.00    6.00
  12  -5  -4  128.90   16.30
  12  -5  -4  126.00   12.80
  12  -5  -4  124.10    4.50
  12  -5  -4  133.10    5.70
 -12   5   5    3.90    2.70
 -12   5   5    4.20    5.70
  12  -5  -5    2.90    3.20
  12  -5  -5    3.50    2.80
  12  -5  -5    3.10    1.40
 -12   5   6  125.10   14.30
 -12   5   6  120.90   19.80
  12  -5  -6  136.80   18.10
  12  -5  -6  135.10   13.60
  12  -5  -6  134.50    5.80
 -12   5   7   44.00   10.00
  12  -5  -7   49.70    8.70
  12  -5  -7   47.10    3.40
  12  -5  -8   74.00    4.30
 -12   5   9   90.50   14.80
 -12   5   9   78.20   27.80
  12  -5  -9   81.90   11.90
  12  -5  -9   84.70    9.20
  12  -5  -9   79.40    4.50
 -12   5  10   12.40    7.40
 -12   5  10    0.00   13.90
  12  -5 -10    4.70    3.50
  12  -5 -10    6.20    3.10
  12  -5 -10    6.60    1.90
 -12   5  11   95.10   15.80
  12  -5 -11   96.10   13.70
  12  -5 -11   91.10    4.90
  12  -5 -12    1.60    1.60
 -12   6   1   12.90    4.10
 -12   6   1   13.90    2.00
  12  -6  -1   12.00    5.00
  12  -6  -1   12.90    2.80
  12  -6  -1   12.50    1.40
  12  -6  -1   14.60    2.10
 -12   6   2   70.60    9.30
 -12   6   2   81.60   13.50
 -12   6   2   88.10    4.60
  12  -6  -2   80.60   11.80
  12  -6  -2   85.70    8.50
  12  -6  -2   73.40    3.30
  12  -6  -2   84.60    4.50
 -12   6   3  144.10   15.80
 -12   6   3  124.90   17.50
 -12   6   3  146.80    6.20
  12  -6  -3  131.90   16.80
  12  -6  -3  132.90   13.10
  12  -6  -3  138.40    4.80
  12  -6  -3  136.70    5.90
 -12   6   4    0.20    2.70
 -12   6   4    1.40    5.70
 -12   6   4    2.60    1.70
  12  -6  -4    2.50    3.30
  12  -6  -4    0.80    2.30
  12  -6  -4    0.50    0.90
  12  -6  -4    1.80    1.40
 -12   6   5  115.20   13.20
 -12   6   5  120.30   16.50
 -12   6   5  111.40    6.10
  12  -6  -5   91.10   13.30
  12  -6  -5  109.30   10.90
  12  -6  -5  102.70    4.00
 -12   6   6   -0.40    5.50
 -12   6   6    4.10    2.60
  12  -6  -6    2.60    3.80
  12  -6  -6   -0.30    2.50
  12  -6  -6    0.90    1.00
 -12   6   7  159.60   20.60
  12  -6  -7  163.00   19.40
  12  -6  -7  169.40   16.30
  12  -6  -7  145.10    5.20
 -12   6   8   70.30   12.60
 -12   6   8   89.20   21.10
  12  -6  -8   74.10   11.10
  12  -6  -8   72.80    7.90
  12  -6  -8   56.50    3.50
 -12   6   9   21.80   23.30
  12  -6  -9   30.70    4.60
  12  -6  -9   37.50    3.10
 -12   6  10   54.00   11.30
 -12   6  10   40.60   19.70
  12  -6 -10   52.40    9.00
  12  -6 -10   53.80    3.60
 -12   6  11    0.70    6.90
 -12   6  11    3.10   11.00
  12  -6 -11    4.60    4.50
  12  -6 -11    0.40    1.30
 -12   6  12   46.10    7.50
  12  -6 -12   69.80    3.60
  12  -6 -12   70.40    4.50
 -12   7   1  110.60   16.20
 -12   7   1  111.40    5.30
  12  -7  -1  104.40   14.20
  12  -7  -1  100.10    9.70
  12  -7  -1   95.40    3.70
  12  -7  -1   98.00    4.80
 -12   7   2  102.20   16.00
 -12   7   2  101.20    4.90
  12  -7  -2  107.00   14.60
  12  -7  -2  113.60    4.30
  12  -7  -2  103.20    5.00
 -12   7   3   62.60    4.10
  12  -7  -3   53.30    9.30
  12  -7  -3   51.30    5.70
 -12   7   4  178.10   19.90
 -12   7   4  192.20   23.70
 -12   7   4  194.00    7.90
  12  -7  -4  195.80   22.70
  12  -7  -4  189.40   17.90
 -12   7   5   -1.00    2.70
 -12   7   5    1.60    1.90
  12  -7  -5    0.50    2.60
  12  -7  -5    0.20    0.90
  12  -7  -5    0.40    1.30
 -12   7   6  179.60   22.90
 -12   7   6  199.70   10.30
  12  -7  -6  196.40   22.50
  12  -7  -6  180.00   17.50
  12  -7  -6  173.90    5.60
  12  -7  -6  191.20    7.30
 -12   7   7    7.50    6.60
 -12   7   7   12.20    6.10
  12  -7  -7   18.40    5.70
  12  -7  -7   17.10    3.30
  12  -7  -7   19.30    2.00
  12  -7  -7   19.20    2.40
 -12   7   8   71.20   13.00
 -12   7   8  109.00   22.80
  12  -7  -8   70.20   10.80
  12  -7  -8   73.10    7.60
  12  -7  -8   61.70    3.60
  12  -7  -8   74.30    4.50
 -12   7   9   28.80    8.70
 -12   7   9   23.60   25.10
  12  -7  -9   31.60    6.90
  12  -7  -9   34.20    4.60
  12  -7  -9   31.20    2.80
  12  -7  -9   32.10    3.00
 -12   7  10   53.80   11.80
 -12   7  10   42.60   21.80
  12  -7 -10   40.90    8.00
  12  -7 -10   62.80    3.80
  12  -7 -10   55.00    3.90
 -12   7  11   69.60   16.60
 -12   7  11  109.30   19.70
  12  -7 -11   79.40   13.50
  12  -7 -11  103.50    4.90
  12  -7 -11  105.50    5.40
 -12   7  12   10.10    7.20
  12  -7 -12    2.20    1.40
  12  -7 -12    2.30    1.50
  12  -7 -13   41.10    3.60
 -12   8   1   25.80    9.60
 -12   8   1   34.10    3.00
  12  -8  -1   26.40    6.60
  12  -8  -1   38.60    2.40
 -12   8   2   79.50   14.60
 -12   8   2   94.60    4.90
  12  -8  -2   91.10   12.80
  12  -8  -2   94.00    9.10
  12  -8  -2   75.90    3.40
  12  -8  -2   91.10    4.70
 -12   8   3  105.10   17.00
 -12   8   3  128.00    6.00
  12  -8  -3  138.70   17.10
  12  -8  -3  127.30   12.10
  12  -8  -3  112.80    4.30
  12  -8  -3  123.10    5.50
 -12   8   4   44.30    4.00
  12  -8  -4   41.60    5.00
  12  -8  -4   40.10    2.50
  12  -8  -4   43.50    3.30
 -12   8   5  110.40   17.10
 -12   8   5  149.40    8.70
  12  -8  -5  126.10   16.30
  12  -8  -5  122.00   11.90
  12  -8  -5  120.80    4.60
  12  -8  -5  118.50    5.50
 -12   8   6   17.00    8.40
  12  -8  -6   18.60    5.60
  12  -8  -6   14.30    3.10
 -12   8   7  118.00   17.00
  12  -8  -7  109.60    4.80
  12  -8  -7  116.40    5.50
  12  -8  -8   14.70    3.10
  12  -8  -8   13.60    2.10
  12  -8  -8   13.30    2.10
 -12   8   9   41.40   10.00
 -12   8   9   60.00   25.20
  12  -8  -9   40.30    7.90
  12  -8  -9   43.70    3.20
  12  -8  -9   38.70    3.20
 -12   8  10   31.80    9.10
 -12   8  10   20.80   21.20
  12  -8 -10   30.00    6.80
  12  -8 -10   29.50    2.90
  12  -8 -10   30.70    3.00
 -12   8  11   19.10   15.90
  12  -8 -11   26.30    2.80
  12  -8 -11   29.00    3.10
 -12   8  12   58.30   11.30
  12  -8 -12   90.40    4.30
  12  -8 -13    3.80    1.90
  12  -8 -13    0.70    1.40
 -12   9   1  167.30   22.20
 -12   9   1  182.40    7.20
  12  -9  -1  163.80   20.40
  12  -9  -1  174.60   16.50
  12  -9  -1  174.50    5.70
  12  -9  -1  156.50    6.20
 -12   9   2   16.70    9.00
 -12   9   2   42.20    3.40
  12  -9  -2   32.80    7.60
  12  -9  -2   36.10    4.40
  12  -9  -2   40.50    2.50
  12  -9  -2   35.30    2.90
 -12   9   3   61.30   13.20
 -12   9   3   73.90    4.70
  12  -9  -3   71.90   11.30
  12  -9  -3   66.10    6.80
  12  -9  -3   64.90    3.10
  12  -9  -3   70.50    4.10
 -12   9   4   43.90   10.80
 -12   9   4   48.50    4.20
  12  -9  -4   34.80    7.80
  12  -9  -4   41.30    4.60
  12  -9  -4   41.90    2.60
  12  -9  -4   49.60    3.50
 -12   9   5   37.30   10.20
 -12   9   5   31.80    4.20
  12  -9  -5   23.40    6.50
  12  -9  -5   20.30    4.40
  12  -9  -5   27.10    2.10
  12  -9  -5   28.50    2.80
 -12   9   6   90.20   15.30
 -12   9   6  132.30    9.00
  12  -9  -6   96.00   13.60
  12  -9  -6  105.50   10.20
  12  -9  -6   96.50    4.00
  12  -9  -6  101.40    5.10
 -12   9   7    2.80    6.30
 -12   9   7    6.50    5.60
  12  -9  -7    2.70    3.20
  12  -9  -7    2.20    2.20
  12  -9  -7    3.70    1.30
  12  -9  -7    5.80    1.70
 -12   9   8   67.30   12.40
 -12   9   8  100.00   20.70
  12  -9  -8   56.70    9.70
  12  -9  -8   57.00    6.20
  12  -9  -8   70.80    3.80
  12  -9  -8   66.10    4.10
 -12   9   9   25.10    8.40
 -12   9   9   31.50   20.40
  12  -9  -9   22.00    6.00
  12  -9  -9   25.80    2.60
  12  -9  -9   20.20    2.50
 -12   9  10   12.50   21.10
  12  -9 -10   25.90    2.70
  12  -9 -10   26.60    2.80
 -12   9  11   20.20   13.30
  12  -9 -11   29.60    3.00
  12  -9 -11   34.40    3.10
 -12   9  12   -0.60    5.50
  12  -9 -12    4.50    1.90
  12  -9 -12    3.80    1.80
  12  -9 -13   88.90    5.10
 -12  10   1    0.50    7.00
 -12  10   1    2.50    1.50
  12 -10  -1   -1.20    3.00
  12 -10  -1    1.40    2.70
  12 -10  -1    1.30    1.00
  12 -10  -1   -0.20    1.00
 -12  10   2   78.60   15.10
 -12  10   2  107.70    5.70
  12 -10  -2   90.30   13.50
  12 -10  -2   89.80    8.90
  12 -10  -2   92.00    3.90
  12 -10  -2   85.80    4.40
 -12  10   3   18.50    8.70
  12 -10  -3   20.10    6.00
  12 -10  -3   19.40    3.50
  12 -10  -3   20.10    2.30
 -12  10   4   53.00   11.80
 -12  10   4   50.00    4.60
  12 -10  -4   62.10    9.80
  12 -10  -4   42.40    2.70
  12 -10  -4   54.10    3.60
 -12  10   5   64.40   12.70
 -12  10   5   61.00    5.70
  12 -10  -5   52.70    9.50
  12 -10  -5   66.10    6.80
  12 -10  -5   53.90    3.00
  12 -10  -5   57.00    3.70
 -12  10   6    4.80    7.80
 -12  10   6   13.20    4.30
  12 -10  -6   13.30    4.90
  12 -10  -6   14.60    3.20
  12 -10  -6   11.40    1.70
  12 -10  -6   11.70    1.90
 -12  10   7   61.40   12.70
 -12  10   7   77.20   10.50
  12 -10  -7   59.50   10.00
  12 -10  -7   72.30    7.20
  12 -10  -7   54.50    3.20
  12 -10  -7   67.20    4.10
 -12  10   8    1.80    6.00
  12 -10  -8    2.80    3.20
  12 -10  -8    3.00    1.50
  12 -10  -8    2.50    1.40
 -12  10   9   85.60   13.90
  12 -10  -9   85.00   12.30
  12 -10  -9   94.10    4.90
 -12  10  10    5.70   16.60
  12 -10 -10   33.90    3.20
  12 -10 -10   38.50    3.20
 -12  10  11   16.50   11.30
  12 -10 -11   28.70    3.00
  12 -10 -11   31.30    3.00
 -12  10  12   23.90    5.90
  12 -10 -12  118.90    5.80
 -12  11   1   44.40   11.80
 -12  11   1   64.00    4.30
  12 -11  -1   41.80    9.50
  12 -11  -1   49.60    6.20
 -12  11   2    4.10    7.50
 -12  11   2    3.90    1.70
  12 -11  -2    1.50    3.30
  12 -11  -2    2.40    2.90
  12 -11  -2    3.20    1.10
 -12  11   3   37.40   10.60
 -12  11   3   46.20    4.10
  12 -11  -3   40.10    8.10
  12 -11  -3   38.20    5.30
  12 -11  -3   40.20    2.50
 -12  11   4   29.90    9.40
 -12  11   4   52.20    4.80
  12 -11  -4   35.00    8.10
  12 -11  -4   29.70    2.20
 -12  11   5   69.20    6.40
  12 -11  -5   66.50   10.70
  12 -11  -5   54.10    6.20
  12 -11  -5   62.10    3.20
 -12  11   6   74.50   14.00
 -12  11   6  113.30    9.10
  12 -11  -6   86.00   12.60
  12 -11  -6   92.70    9.20
  12 -11  -6  107.30    4.50
 -12  11   7    1.50    5.30
 -12  11   7    1.90    5.60
  12 -11  -7    0.40    2.80
  12 -11  -7    0.40    1.10
 -12  11   8   42.80   10.10
 -12  11   8   56.60   14.40
  12 -11  -8   42.50    8.30
  12 -11  -8   53.90    3.60
 -12  11   9    7.20   10.90
 -12  11  10   32.50   13.80
  12 -11 -10  101.60    5.10
 -12  11  11    2.30    5.90
  12 -11 -11   49.10    4.00
 -12  12   1   -4.30    6.30
  12 -12  -1    3.40    3.90
  12 -12  -1    1.70    3.50
 -12  12   2   55.60   12.40
  12 -12  -2   87.70   12.40
  12 -12  -2   75.60    8.70
 -12  12   3    3.60    6.40
  12 -12  -3    2.00    3.30
  12 -12  -3    4.20    2.90
  12 -12  -4   86.10    9.20
 -12  12   5   24.20    8.60
  12 -12  -5   30.70    6.80
  12 -12  -5   28.40    5.10
 -12  12   6   27.70    8.50
  12 -12  -6   29.40    6.80
 -12  12   7   59.00   11.20
  12 -12  -7   73.20   11.40
 -12  13   1   33.30    9.70
  12 -13  -1   53.00   10.60
  12 -13  -1   67.40    8.90
 -12  13   2    0.30    5.20
  12 -13  -2    3.30    3.60
  12 -13  -2    1.10    4.10
 -12  13   3   41.70   11.00
  12 -13  -3  107.50   14.50
  12 -13  -3  109.70   11.00
 -12  13   4    3.60    4.80
  12 -13  -4   12.50    4.80
 -12  13   5   26.60    7.40
  12 -13  -5   42.60    8.40
 -12  13   6   16.40    6.40
  11  16  -1   99.90   11.30
 -11 -15   1    6.50    3.70
  11  15  -1   12.20    4.00
  11  15  -2  148.00   16.10
  11  15  -3    7.00    3.70
 -11 -14   1  110.70   15.20
  11  14  -1  126.10   14.00
 -11 -14   2    1.50    3.10
  11  14  -2   -0.10    3.20
  11  14  -3   85.00   10.70
  11  14  -4    9.80    4.20
 -11 -13   1   18.40    5.50
  11  13  -1   26.70    5.30
 -11 -13   2   69.70   11.00
  11  13  -2   71.20    9.70
  11  13  -4   48.10    7.60
  11  13  -5   19.90    5.10
 -11 -12   1  155.50   19.20
  11  12  -1  163.50   17.70
  11  12  -2    3.10    3.50
 -11 -12   3   61.70   10.30
  11  12  -3   79.10   10.70
 -11 -12   4    0.00    3.00
  11  12  -4    5.10    3.70
 -11 -12   5  161.70   19.60
  11  12  -5  161.80   18.30
  11  12  -6   54.40    8.80
 -11 -11   1   80.90   11.60
  11  11  -1   86.50   10.60
  11  11  -1   70.10   12.10
 -11 -11   2  176.00   20.80
  11  11  -2  180.40   19.40
  11  11  -2  163.90   21.40
  11  11  -3    5.80    3.80
 -11 -11   4  136.20   17.00
  11  11  -4  149.30   17.00
 -11 -11   5   16.20    5.30
  11  11  -5   12.60    4.70
 -11 -11   6  139.50   17.30
  11  11  -6  147.30   17.20
  11  11  -7   31.50    7.00
  11  10  -1   80.80   10.50
 -11 -10   2   73.60   11.00
  11  10  -2   77.90   10.50
  11  10  -2   79.30   12.90
 -11 -10   3  183.10   21.60
  11  10  -3  180.10   20.70
  11  10  -3  196.10   23.40
  11  10  -4   -0.10    3.20
 -11 -10   5  249.40   28.00
  11  10  -5  256.70   27.70
 -11 -10   6   22.70    6.20
  11  10  -6   24.40    6.20
 -11 -10   7   49.90    8.50
  11  10  -7   46.00    8.60
  11  10  -8   38.40    8.00
  11   9  -1  124.50   15.00
 -11  -9   2  141.00   17.40
 -11  -9   3   23.20    6.00
  11   9  -3   22.80    5.60
  11   9  -3   24.70    7.90
 -11  -9   4  223.30   25.30
  11   9  -4  226.20   24.90
  11   9  -4  223.90   26.20
  11   9  -5   24.90    6.20
 -11  -9   6   99.40   13.50
  11   9  -6  110.40   14.30
 -11  -9   7   18.60    5.20
  11   9  -7   17.70    6.20
  11   9  -8   39.00    8.20
  11   9  -9   39.10    8.20
  11   8  -1   76.80   10.60
  11   8  -2   79.40   10.80
 -11  -8   3  181.50   21.30
  11   8  -3  175.70   20.20
  11   8  -3  201.80   23.30
 -11  -8   4   11.90    4.60
  11   8  -4   11.40    4.50
  11   8  -4   11.50    6.40
 -11  -8   5  223.10   24.40
  11   8  -5  193.00   22.10
  11   8  -5  188.90   23.00
 -11  -8   7   93.50   12.60
  11   8  -7   88.80   12.50
 -11  -8   8   40.80    7.60
  11   8  -9   31.20    7.10
  11   8 -10   82.80   12.80
 -11  -7   1  184.80   21.10
 -11  -7   1  209.60   12.10
  11   7  -1  206.60   22.50
  11   7  -1  186.50   21.90
  11   7  -2  112.10   14.00
  11   7  -3   91.70   12.10
 -11  -7   4  195.20   21.80
  11   7  -4  170.70   20.00
  11   7  -4  184.40   21.50
 -11  -7   5   11.40    4.30
  11   7  -5   12.20    4.50
  11   7  -5   10.70    5.30
 -11  -7   6   97.60   13.00
  11   7  -6  103.40   13.50
 -11  -7   7    6.50    3.90
  11   7  -7    4.10    3.70
 -11  -7   8  134.70   15.80
  11   7  -8  143.60   17.70
 -11  -7   9   38.80    7.30
  11   7  -9   48.00    8.70
  11   7 -10   32.60    7.90
 -11  -6   1   77.50   10.70
 -11  -6   1   77.30   11.40
 -11  -6   1   78.60    2.70
  11   6  -1   83.90   11.20
  11   6  -1   72.30   11.10
 -11  -6   2  147.60   17.60
 -11  -6   2  137.70   17.20
  11   6  -2  134.60   16.40
  11   6  -2  158.20   18.60
 -11  -6   3   86.40   12.60
  11   6  -3   73.60   10.70
 -11  -6   4   54.30    9.30
  11   6  -4   54.20    8.80
 -11  -6   5  183.50   20.50
 -11  -6   5  182.30   21.60
  11   6  -5  155.40   18.80
  11   6  -5  161.70   19.20
 -11  -6   6    3.60    3.30
  11   6  -6    5.00    5.10
 -11  -6   7  173.30   19.90
 -11  -6   7  154.50   19.90
  11   6  -7  180.20   21.00
 -11  -6   8   10.90    4.20
 -11  -6   8    6.30    6.40
  11   6  -8   11.20    4.70
 -11  -6   9   76.90   10.50
 -11  -6   9   87.00   14.50
  11   6  -9   75.60   11.60
  11   6 -10   65.90   10.60
  11   6 -11   16.80    6.00
 -11  -5   1  269.30   29.00
 -11  -5   1  269.30   29.10
 -11  -5   1  287.00    7.40
 -11  -5   1  281.90    7.70
  11   5  -1  288.70   30.20
  11   5  -1  284.40   29.90
 -11  -5   2   64.20    9.30
 -11  -5   2   75.60    2.80
  11   5  -2   61.10    9.70
  11   5  -2   69.80    2.20
 -11  -5   3  111.30   14.10
 -11  -5   3  123.30   15.80
  11   5  -3  121.40   15.10
  11   5  -3  138.70   16.70
 -11  -5   4  125.90   16.80
  11   5  -4  126.10   15.50
 -11  -5   5   98.70   13.00
 -11  -5   5  110.70   14.90
  11   5  -5  103.90   13.40
  11   5  -5  102.10   13.80
 -11  -5   6  143.70   16.70
 -11  -5   6  119.70   16.80
  11   5  -6  122.00   15.50
  11   5  -6  137.90   16.70
 -11  -5   7    0.30    2.50
 -11  -5   7    2.80    5.30
  11   5  -7    0.30    3.30
  11   5  -7   -1.80    4.70
 -11  -5   8  129.90   15.60
 -11  -5   8  129.00   17.50
  11   5  -8  125.90   16.10
  11   5  -9   60.40   10.10
 -11  -5  10   72.00    9.90
 -11  -5  10   87.10   14.40
  11   5 -10   83.90   12.00
 -11  -5  11  103.60   16.70
  11   5 -11   87.00   12.80
 -11  -4   1    9.20    3.50
 -11  -4   1    6.40    4.70
 -11  -4   1   10.40    1.30
  11   4  -1    6.00    3.40
  11   4  -1    2.80    4.10
  11   4  -1    8.70    1.10
 -11  -4   2  242.10   26.00
 -11  -4   2  251.80   27.30
 -11  -4   2  246.20    6.50
  11   4  -2  232.70   25.70
  11   4  -2  241.60   25.90
  11   4  -2  273.70    6.70
  11   4  -2  249.50    6.40
 -11  -4   3   48.40    7.80
 -11  -4   3   48.50    9.40
 -11  -4   3   52.70    3.20
  11   4  -3   51.50    8.30
  11   4  -3   48.00    8.60
  11   4  -3   39.50    1.60
  11   4  -3   47.20    1.90
 -11  -4   4  101.90   14.20
  11   4  -4  117.70   14.50
 -11  -4   5  121.80   16.10
  11   4  -5  132.80   15.90
 -11  -4   6   94.70   12.10
 -11  -4   6  110.20   14.90
  11   4  -6   94.60   12.70
  11   4  -6   93.90   12.80
 -11  -4   7  190.80   20.80
  11   4  -7  171.90   19.90
 -11  -4   8    2.80    3.10
 -11  -4   8   -1.60    4.70
  11   4  -8    2.80    3.70
 -11  -4   9  119.60   14.40
 -11  -4   9  124.70   17.50
  11   4  -9  120.90   15.30
 -11  -4  10  103.60   12.70
  11   4 -10  117.50   15.40
 -11  -4  11   26.50    9.10
  11   4 -11   21.10    6.10
 -11  -4  12   75.90   13.60
  11   4 -12   64.50   10.80
 -11  -3   1  254.70   27.20
 -11  -3   1  272.30   28.90
 -11  -3   1  261.80    7.20
  11   3  -1  261.00   27.90
  11   3  -1  284.20   29.10
  11   3  -1  277.80    7.60
 -11  -3   2    1.90    2.60
 -11  -3   2    3.80    4.80
 -11  -3   2    3.40    1.10
  11   3  -2    3.30    3.20
  11   3  -2    3.90    4.40
  11   3  -2    1.80    0.90
 -11  -3   3  205.60   23.30
 -11  -3   3  270.80    7.80
  11   3  -3  287.40   28.80
  11   3  -3  242.90    5.90
  11   3  -3  263.10    7.00
 -11  -3   4  159.40   17.80
 -11  -3   4  144.50   18.20
 -11  -3   4  190.90   13.50
  11   3  -4  149.00   17.60
  11   3  -4  160.00   18.00
  11   3  -4  150.10    4.10
  11   3  -4  144.00    4.10
 -11  -3   5   75.90   11.90
 -11  -3   5   73.60    4.50
 -11  -3   5   75.00    2.50
  11   3  -5   71.30   10.30
  11   3  -5   63.20    2.00
  11   3  -5   69.40    2.20
 -11  -3   6  167.10   20.00
  11   3  -6  155.60   18.40
 -11  -3   7    7.00    3.50
 -11  -3   7   10.40    5.90
  11   3  -7    7.10    3.70
  11   3  -7    7.70    4.40
 -11  -3   8  284.50   30.00
 -11  -3   8  305.10   33.30
  11   3  -8  300.90   31.90
 -11  -3   9   11.70    4.10
 -11  -3   9    7.60    5.70
  11   3  -9    8.90    4.50
 -11  -3  10   98.00   12.10
 -11  -3  10   97.40   15.20
  11   3 -10  106.20   13.90
 -11  -3  11   50.70    7.50
 -11  -3  11   46.30   10.60
  11   3 -11   47.90    8.70
 -11  -3  12   17.80    7.70
  11   3 -12   23.60    5.90
 -11  -2   1   10.40    1.40
  11   2  -1   10.70    3.80
  11   2  -1   14.90    5.00
 -11  -2   2  356.20   36.50
 -11  -2   2  376.30   38.70
 -11  -2   2  398.70   10.30
  11   2  -2  371.80   38.30
  11   2  -2  394.80   38.80
  11   2  -2  352.40    8.10
  11   2  -2  373.20    9.60
 -11  -2   3   20.70    4.50
 -11  -2   3   17.20    6.30
  11   2  -3   16.30    4.60
  11   2  -3   13.50    4.70
  11   2  -3   22.80    1.60
  11   2  -3   21.80    1.80
 -11  -2   4  222.90   23.30
 -11  -2   4  222.90   24.70
 -11  -2   4  225.70    8.40
  11   2  -4  203.30   23.00
  11   2  -4  242.60   24.70
  11   2  -4  200.00    5.10
  11   2  -4  217.70    6.20
 -11  -2   5  197.20   21.40
 -11  -2   5  194.20   22.30
  11   2  -5  161.50   19.40
  11   2  -5  202.20   22.30
  11   2  -5  192.00    5.40
  11   2  -5  176.00    5.00
 -11  -2   6   80.40   11.90
  11   2  -6   60.90    9.30
  11   2  -6   57.30    2.10
  11   2  -6   62.20    2.40
 -11  -2   7  145.80   18.30
  11   2  -7  147.10   17.60
 -11  -2   8    7.90    3.40
 -11  -2   8    5.50    5.40
  11   2  -8    3.10    3.60
  11   2  -8    3.30    3.80
 -11  -2   9  220.40   25.80
  11   2  -9  221.70   24.80
 -11  -2  10   17.90    4.60
 -11  -2  10   20.00    7.60
  11   2 -10   16.80    5.20
  11   2 -11   62.50    9.80
 -11  -2  12   27.70    8.90
  11   2 -12   27.10    6.50
 -11  -1   1  235.60   24.10
 -11  -1   1  221.00   24.50
 -11  -1   1  218.60    6.60
  11   1  -1  240.60   25.40
  11   1  -1  249.40   24.90
  11   1  -1  215.50    5.80
  11   1  -1  231.40    7.10
 -11  -1   2   18.90    1.80
  11   1  -2   12.90    4.30
  11   1  -2   17.30    4.70
  11   1  -2   13.50    1.20
  11   1  -2   17.70    1.80
 -11  -1   3  327.10   32.90
 -11  -1   3  350.10   35.70
 -11  -1   3  317.70    8.70
  11   1  -3  321.80   33.80
  11   1  -3  329.50   33.00
  11   1  -3  320.60    7.90
 -11  -1   4   36.70    6.00
 -11  -1   4   38.20    3.00
  11   1  -4   32.90    6.40
  11   1  -4   37.20    1.90
  11   1  -4   32.40    2.20
 -11  -1   5  114.90   13.40
 -11  -1   5  124.20   15.90
  11   1  -5   98.00   13.20
  11   1  -5  126.70   14.30
  11   1  -5  105.40    3.60
  11   1  -5  114.80    4.30
 -11  -1   6  127.20   15.00
 -11  -1   6  135.80   17.20
  11   1  -6  134.20   16.30
  11   1  -6  136.70   15.50
  11   1  -6  135.10    4.50
  11   1  -6  143.50    5.10
 -11  -1   7   18.70    7.10
 -11  -1   7    8.30    2.90
  11   1  -7   10.00    4.30
  11   1  -7   11.50    1.20
  11   1  -7   13.40    1.50
 -11  -1   8  149.20   16.90
  11   1  -8  148.80   16.70
  11   1  -8  159.10    4.20
  11   1  -8  152.00    4.50
 -11  -1   9   14.00    4.20
 -11  -1   9   13.50    6.20
  11   1  -9   14.90    4.90
 -11  -1  10  109.40   12.90
 -11  -1  10  135.20   17.80
  11   1 -10  107.80   14.10
 -11  -1  11    4.10    2.70
 -11  -1  12   70.80   12.70
  11   1 -12   66.10   10.30
 -11  -1  13   33.40   10.10
  11   1 -13   43.20    8.30
 -11   0   1   66.70    8.50
 -11   0   1   64.50   10.10
 -11   0   1   72.30    3.50
  11   0  -1   70.10   10.10
  11   0  -1   60.60    8.30
  11   0  -1   69.40    2.80
  11   0  -1   69.80    3.50
 -11   0   2  384.90   37.50
 -11   0   2  391.30   39.40
 -11   0   2  356.20    9.50
  11   0  -2  360.40   37.70
  11   0  -2  372.50   36.60
  11   0  -2  365.10    8.80
  11   0  -2  360.00    9.80
 -11   0   3    5.80    3.20
 -11   0   3    1.70    4.50
 -11   0   3    4.00    1.20
  11   0  -3    8.70    4.10
  11   0  -3    4.40    3.80
  11   0  -3    4.60    0.90
  11   0  -3    4.10    1.20
 -11   0   4  196.50   21.00
 -11   0   4  216.60    7.50
  11   0  -4  207.00   21.40
  11   0  -4  199.90    5.50
  11   0  -4  208.00    6.60
 -11   0   5   83.90   10.40
 -11   0   5   75.90   11.60
 -11   0   5   84.60    5.90
  11   0  -5   77.20   11.20
  11   0  -5   87.00   10.60
  11   0  -5   80.40    3.10
 -11   0   6   33.60    5.80
 -11   0   6   40.60    9.00
 -11   0   6   36.90   12.20
  11   0  -6   42.60    7.70
  11   0  -6   45.50    7.00
  11   0  -6   35.00    2.30
  11   0  -6   45.50    2.70
 -11   0   7  107.20   14.70
 -11   0   7  106.00   13.10
  11   0  -7  103.30   13.80
  11   0  -7  102.30    3.80
  11   0  -7  103.60    4.20
 -11   0   8   16.80    8.10
  11   0  -8   26.90    6.90
  11   0  -8   20.50    1.90
 -11   0   9  115.50   16.70
  11   0  -9  123.80   15.90
  11   0  -9  139.60    4.20
  11   0  -9  142.80    4.90
 -11   0  10    3.80    2.80
 -11   0  10    7.20    6.60
 -11   0  10    1.10    1.20
  11   0 -10    3.70    3.30
  11   0 -10    4.20    1.00
  11   0 -10    3.20    1.10
 -11   0  11  123.80   13.80
 -11   0  11  110.00   17.10
  11   0 -11  132.90   16.50
  11   0 -11  120.10    3.50
  11   0 -11  126.40    3.90
 -11   0  12   28.80    8.80
  11   0 -12   26.80    6.20
 -11   0  13   42.70   10.00
  11   0 -13   34.60    7.20
 -11   1   1  272.80   27.30
 -11   1   1  266.40   28.50
  11  -1  -1  263.80   28.50
  11  -1  -1  273.30   26.90
  11  -1  -1  262.00    7.90
 -11   1   2   16.10    3.60
 -11   1   2   25.90    6.80
 -11   1   2   25.60    2.20
 -11   1   3  343.60   34.20
 -11   1   3  354.90   36.50
 -11   1   3  350.50    9.80
  11  -1  -3  331.70   35.40
  11  -1  -3  331.70   33.00
  11  -1  -3  353.20    8.90
  11  -1  -3  338.50    9.50
 -11   1   4    8.90    3.40
 -11   1   4    6.10    1.60
  11  -1  -4    1.00    2.80
  11  -1  -4    6.60    1.10
  11  -1  -4    7.40    1.40
 -11   1   5  125.50   14.00
 -11   1   5  121.40   15.60
 -11   1   5  119.40    6.30
  11  -1  -5  116.60   15.10
  11  -1  -5  121.60   13.40
 -11   1   6   70.90    9.00
 -11   1   6   63.40   10.70
 -11   1   6   88.90   12.50
  11  -1  -6   63.60    9.90
  11  -1  -6   67.70    8.70
  11  -1  -6   59.80    2.90
  11  -1  -6   65.30    3.40
 -11   1   7   41.80    6.40
 -11   1   7   51.90    9.90
 -11   1   7   47.50   15.20
  11  -1  -7   37.10    7.50
  11  -1  -7   48.90    7.10
  11  -1  -7   49.50    2.90
  11  -1  -7   46.10    2.90
 -11   1   8  166.10   20.70
 -11   1   8  172.70   15.90
  11  -1  -8  159.60   19.50
  11  -1  -8  161.60    5.20
  11  -1  -8  179.60    6.50
 -11   1   9    7.30    6.20
 -11   1   9    6.20    3.30
  11  -1  -9    5.20    3.60
  11  -1  -9    5.70    1.20
 -11   1  10  103.30   12.30
 -11   1  10  125.00   16.90
  11  -1 -10  121.30   15.40
  11  -1 -10  108.50    3.70
  11  -1 -10  112.10    4.50
 -11   1  11    5.00    3.00
 -11   1  11    7.70    6.50
  11  -1 -11    2.50    3.50
  11  -1 -11    3.00    1.10
  11  -1 -11    2.80    1.40
 -11   1  12   74.40   13.30
  11  -1 -12   72.60   11.00
  11  -1 -12   79.80    3.40
  11  -1 -12   66.70    3.20
 -11   1  13   40.60   10.50
  11  -1 -13   55.00    9.10
 -11   2   1   62.20    8.00
 -11   2   1   78.10   10.90
 -11   2   1   75.80    3.70
  11  -2  -1   76.60   10.80
  11  -2  -1   77.00    8.80
 -11   2   2  173.10   18.40
 -11   2   2  190.80   21.50
 -11   2   2  207.30    6.90
  11  -2  -2  194.70   22.00
  11  -2  -2  174.50   18.20
 -11   2   3    1.60    2.00
 -11   2   3    5.50    4.90
  11  -2  -3    1.50    1.00
 -11   2   4  206.40   20.90
  11  -2  -4  201.40   20.30
  11  -2  -4  194.20    6.60
 -11   2   5   40.00    6.10
 -11   2   5   40.20    8.20
 -11   2   5   33.00    3.30
  11  -2  -5   36.20    7.20
  11  -2  -5   37.40    5.80
  11  -2  -5   38.20    2.20
  11  -2  -5   39.40    2.80
 -11   2   6  129.00   14.30
 -11   2   6  131.40   16.60
 -11   2   6  119.40    9.30
  11  -2  -6  115.10   15.20
  11  -2  -6  135.50   14.30
  11  -2  -6  123.80    4.40
  11  -2  -6  135.60    5.30
 -11   2   7   88.10   10.50
 -11   2   7   76.50   12.20
 -11   2   7   56.80   15.10
  11  -2  -7   77.00   11.40
  11  -2  -7   92.30   10.40
  11  -2  -7   79.30    3.70
  11  -2  -7   84.50    4.10
 -11   2   8   75.90    9.60
 -11   2   8   90.80   13.60
 -11   2   8   75.60   16.20
  11  -2  -8   65.70   10.30
  11  -2  -8   82.70    9.60
  11  -2  -8   83.80    3.90
  11  -2  -8   82.70    4.10
 -11   2   9  176.10   21.40
 -11   2   9  197.20   15.80
  11  -2  -9  141.70   17.90
  11  -2  -9  162.70    5.40
  11  -2  -9  164.40    6.10
 -11   2  10   17.80    7.70
 -11   2  10   10.00    3.50
  11  -2 -10   16.20    5.30
  11  -2 -10   14.80    1.60
  11  -2 -10   15.20    2.00
 -11   2  11  107.60   12.90
 -11   2  11  109.50   16.10
  11  -2 -11  112.80   15.10
  11  -2 -11  118.90    4.20
  11  -2 -11  115.00    4.90
 -11   2  12    6.40    3.40
 -11   2  12    8.40    6.30
 -11   2  12    3.50    1.90
  11  -2 -12    6.90    4.00
  11  -2 -12    8.30    1.50
  11  -2 -12    8.10    1.80
 -11   2  13   53.60   11.40
  11  -2 -13   42.10    7.90
 -11   3   1  184.20   19.30
 -11   3   1  174.20   20.30
 -11   3   1  186.20    6.30
  11  -3  -1  202.00   22.20
  11  -3  -1  172.80   17.40
  11  -3  -1  203.30    6.00
  11  -3  -1  178.20    6.40
 -11   3   2   44.80    6.50
 -11   3   2   51.00    8.90
 -11   3   2   59.60    3.40
  11  -3  -2   53.90    8.80
  11  -3  -2   60.00    7.10
  11  -3  -2   48.80    2.40
 -11   3   3  126.10   14.20
 -11   3   3  132.80   16.40
 -11   3   3  128.70    5.20
  11  -3  -3  134.00   16.50
  11  -3  -3  136.30   13.90
  11  -3  -3  147.30    4.90
  11  -3  -3  124.00    5.10
 -11   3   4    1.10    2.20
 -11   3   4    3.60    1.50
  11  -3  -4    2.40    3.00
  11  -3  -4    1.70    0.90
  11  -3  -4    3.20    1.30
 -11   3   5  223.30   22.90
 -11   3   5  215.00   24.60
 -11   3   5  201.30    7.80
  11  -3  -5  218.50   24.50
  11  -3  -5  220.60   21.70
  11  -3  -5  203.30    5.80
  11  -3  -5  229.10    7.60
 -11   3   6   26.00    5.00
 -11   3   6   19.70    6.60
 -11   3   6   21.80    3.90
  11  -3  -6   22.10    5.70
  11  -3  -6   21.70    4.40
  11  -3  -6   19.10    1.70
  11  -3  -6   24.90    2.40
 -11   3   7  165.70   18.40
 -11   3   7  192.40   22.30
 -11   3   7  210.10   21.00
  11  -3  -7  176.30   20.90
  11  -3  -7  183.90   18.40
  11  -3  -7  183.70    6.10
  11  -3  -7  177.80    6.40
 -11   3   8  142.80   15.90
 -11   3   8  114.20   26.80
  11  -3  -8  132.00   13.90
  11  -3  -8  142.80    5.50
  11  -3  -8  129.90    5.40
 -11   3   9   86.80   13.30
  11  -3  -9   74.70   11.20
  11  -3  -9   72.20    3.80
  11  -3  -9   74.30    4.00
 -11   3  10   95.80   14.40
  11  -3 -10   96.60   13.30
  11  -3 -10   95.70    4.50
 -11   3  11   -1.20    5.30
  11  -3 -11    6.70    4.30
  11  -3 -11    0.80    1.30
 -11   3  12   40.80   10.30
 -11   3  12   39.20    4.10
  11  -3 -12   43.70    8.30
  11  -3 -12   48.40    3.40
 -11   3  13   36.10    9.60
  11  -3 -13   29.50    6.90
  11  -3 -13   26.90    2.20
  11  -3 -13   27.00    2.80
 -11   4   1  150.20   16.40
 -11   4   1  170.90   19.60
 -11   4   1  160.60    5.90
  11  -4  -1  149.00   18.10
  11  -4  -1  165.60   15.90
  11  -4  -1  159.90    5.00
  11  -4  -1  163.80    6.20
 -11   4   2  148.70   15.80
 -11   4   2  156.30   18.30
 -11   4   2  137.50    5.40
  11  -4  -2  142.40   17.20
  11  -4  -2  142.40   14.00
  11  -4  -2  133.70    4.30
  11  -4  -2  137.40    5.50
 -11   4   3  108.90   12.20
 -11   4   3   96.00   13.30
 -11   4   3   97.40    4.50
  11  -4  -3   85.80   12.10
  11  -4  -3   95.10    9.90
  11  -4  -3   95.80    3.70
  11  -4  -3   98.60    4.60
 -11   4   4  190.70   20.20
 -11   4   4  213.20   23.50
 -11   4   4  177.70    6.60
  11  -4  -4  203.70   22.90
  11  -4  -4  201.30   19.30
  11  -4  -4  178.60    5.40
  11  -4  -4  201.50    7.10
 -11   4   5    2.90    2.80
 -11   4   5    1.50    4.40
 -11   4   5    2.70    1.60
  11  -4  -5    5.10    3.50
  11  -4  -5    3.90    3.10
  11  -4  -5    4.70    1.10
  11  -4  -5    3.00    1.30
  11  -4  -6  298.20   31.50
  11  -4  -6  273.30   26.50
  11  -4  -6  269.40    7.30
  11  -4  -6  285.80    9.00
 -11   4   7   26.40    5.20
 -11   4   7   26.00    7.30
 -11   4   7   49.60   10.20
  11  -4  -7   28.90    6.60
  11  -4  -7   27.50    4.50
  11  -4  -7   28.00    2.30
 -11   4   8   86.70   10.90
 -11   4   8   86.80   20.10
  11  -4  -8   84.70    9.30
  11  -4  -8   96.20    4.50
 -11   4   9   91.40   14.10
 -11   4   9   81.20   19.10
  11  -4  -9   84.10   12.30
  11  -4  -9   81.00    9.40
  11  -4  -9   85.90    4.30
 -11   4  10   36.50    9.20
 -11   4  10   67.90   14.10
  11  -4 -10   27.00    6.30
  11  -4 -10   26.50    2.40
 -11   4  11  126.60   19.10
 -11   4  11  116.00   10.10
  11  -4 -11  110.20   15.30
  11  -4 -11  119.20    4.50
 -11   4  12   12.70    7.30
 -11   4  12   10.60    3.50
  11  -4 -12   13.80    5.20
  11  -4 -12   10.80    1.70
 -11   4  13   66.00   13.40
 -11   4  13   56.90    4.60
  11  -4 -13   64.30   10.90
  11  -4 -13   73.20    3.40
 -11   5   1   21.60    4.50
 -11   5   1   18.50    6.60
 -11   5   1   19.50    2.20
  11  -5  -1   18.60    5.10
  11  -5  -1   19.20    3.30
  11  -5  -1   18.10    1.60
  11  -5  -1   19.80    2.20
 -11   5   2  107.30   12.40
 -11   5   2  127.30   16.10
 -11   5   2  111.80    4.80
  11  -5  -2  113.90   14.80
  11  -5  -2  135.10   12.80
  11  -5  -2  127.50    4.40
  11  -5  -2  122.60    5.30
 -11   5   3  143.80   15.50
 -11   5   3  139.60    5.60
  11  -5  -3  141.70   13.80
  11  -5  -3  141.60    4.70
  11  -5  -3  138.80    5.60
 -11   5   4    7.10    2.80
 -11   5   4    7.40    5.50
 -11   5   4   10.00    1.90
  11  -5  -4   10.00    4.70
  11  -5  -4   10.80    3.10
  11  -5  -4   10.10    1.40
  11  -5  -4   10.30    1.80
 -11   5   5  229.60   26.20
 -11   5   5  227.60    8.60
  11  -5  -5  239.70   26.50
  11  -5  -5  228.60    6.60
  11  -5  -5  241.60    8.10
 -11   5   6    5.40    3.00
 -11   5   6    0.30    4.40
 -11   5   6    4.80    2.30
  11  -5  -6    1.50    3.10
  11  -5  -6    3.50    2.50
  11  -5  -6    1.90    1.10
  11  -5  -6    3.80    1.40
 -11   5   7  194.20   14.20
  11  -5  -7  142.60   17.90
  11  -5  -7  161.90   15.70
  11  -5  -7  145.00    5.20
  11  -5  -7  158.30    6.20
 -11   5   8   43.30    6.90
 -11   5   8   36.00    8.80
 -11   5   8   36.20   16.60
  11  -5  -8   32.90    7.00
  11  -5  -8   39.60    5.30
  11  -5  -8   42.20    2.90
  11  -5  -8   48.00    3.40
 -11   5   9   40.50    9.20
 -11   5   9   52.40   19.60
  11  -5  -9   36.60    7.60
  11  -5  -9   52.40    3.90
 -11   5  10  103.20   15.50
 -11   5  10  133.30   20.40
  11  -5 -10  103.40   13.80
  11  -5 -10  102.40   10.90
  11  -5 -10  106.60    4.80
  11  -5 -10   92.00    4.70
 -11   5  11    7.70    7.20
  11  -5 -11    1.80    1.40
  11  -5 -11    2.80    1.60
 -11   5  12  110.40   16.80
 -11   5  12   97.70    9.00
  11  -5 -12  117.20   15.20
  11  -5 -12  114.30    4.40
  11  -5 -12  109.10    5.30
 -11   5  13    8.90    7.60
 -11   5  13    2.50    2.90
  11  -5 -13   12.60    5.80
  11  -5 -13    9.50    1.60
  11  -5 -13    6.20    1.90
 -11   6   1  108.30   12.90
 -11   6   1  125.40   16.20
 -11   6   1  130.20    5.40
  11  -6  -1  141.40   16.90
  11  -6  -1  130.10   12.10
  11  -6  -1  110.10    3.90
  11  -6  -1  125.10    5.40
 -11   6   2   15.60    4.00
 -11   6   2   21.30    7.00
 -11   6   2   23.10    2.30
  11  -6  -2   22.30    6.10
  11  -6  -2   18.80    3.10
  11  -6  -2   22.30    1.90
  11  -6  -2   18.90    2.20
 -11   6   3   52.70    7.40
 -11   6   3   51.40   10.00
 -11   6   3   59.90    3.70
  11  -6  -3   60.00    9.60
  11  -6  -3   57.60    6.10
  11  -6  -3   59.90    2.90
  11  -6  -3   63.60    3.80
  11  -6  -4  159.30   19.40
  11  -6  -4  168.70   16.20
  11  -6  -4  177.60    6.10
  11  -6  -4  168.30    6.50
 -11   6   5    5.80    3.00
 -11   6   5   -0.60    5.10
  11  -6  -5    2.30    3.10
  11  -6  -5    1.30    2.20
  11  -6  -5    4.10    1.40
 -11   6   6  187.60   20.40
 -11   6   6  219.00   24.80
  11  -6  -6  207.80   23.70
  11  -6  -6  207.30   19.70
  11  -6  -6  205.20    7.30
 -11   6   7   12.30    3.70
 -11   6   7    6.50    5.90
  11  -6  -7   15.40    5.50
  11  -6  -7    9.40    2.80
  11  -6  -7   10.60    1.90
 -11   6   8  106.40   15.60
  11  -6  -8   98.60   13.60
  11  -6  -8   99.90   10.20
  11  -6  -8  104.70    5.10
 -11   6   9   61.00   11.60
  11  -6  -9   63.10   10.10
  11  -6  -9   59.40    6.70
  11  -6  -9   66.50    4.00
 -11   6  10   25.70    8.50
  11  -6 -10   16.90    5.10
  11  -6 -10   19.30    3.60
  11  -6 -10   19.60    2.60
  11  -6 -10   21.50    2.50
 -11   6  11   94.50   15.20
 -11   6  11   76.90   15.90
  11  -6 -11   87.30   12.50
  11  -6 -11   95.60    4.40
  11  -6 -11   95.20    4.90
 -11   6  12    3.30    6.10
 -11   6  12   -0.90    5.20
  11  -6 -12    5.00    3.90
  11  -6 -12    2.60    1.30
  11  -6 -12    2.00    1.50
 -11   6  13   74.90    7.60
  11  -6 -13   86.10    3.80
  11  -6 -13   92.30    5.10
  11  -6 -14    1.60    1.30
  11  -6 -14    1.40    1.60
 -11   7   1    5.20    5.30
 -11   7   1    3.80    1.40
  11  -7  -1    4.50    3.40
  11  -7  -1    4.30    2.10
  11  -7  -1    7.10    1.10
  11  -7  -1    6.50    1.60
 -11   7   2  123.20    5.40
  11  -7  -2  128.80   11.90
  11  -7  -2  127.20    4.50
  11  -7  -2  112.80    5.10
 -11   7   3  125.60   14.60
 -11   7   3  118.60   16.40
 -11   7   3  125.90    5.50
  11  -7  -3  132.10   16.50
  11  -7  -3  139.70   12.80
  11  -7  -3  123.90    4.50
 -11   7   4   34.20    8.20
 -11   7   4   40.80    3.50
  11  -7  -4   32.30    7.20
  11  -7  -4   28.10    2.10
 -11   7   5  182.60   19.40
 -11   7   5  166.30   20.60
 -11   7   5  179.30    7.70
  11  -7  -5  183.50   21.40
  11  -7  -5  175.80   16.50
  11  -7  -5  162.10    5.30
 -11   7   6    3.10    2.50
 -11   7   6    1.90    4.70
 -11   7   6    1.80    2.10
  11  -7  -6    3.20    3.10
  11  -7  -6    1.40    2.30
  11  -7  -6    2.80    1.10
 -11   7   7  114.40   13.40
 -11   7   7   91.60   15.10
 -11   7   7  111.30    9.60
  11  -7  -7  121.20   15.80
  11  -7  -7  122.00   11.60
  11  -7  -7  102.80    4.20
 -11   7   8   21.90    7.40
 -11   7   8   38.20   14.20
  11  -7  -8   35.90    7.60
  11  -7  -8   35.20    2.70
 -11   7   9   59.60   11.50
 -11   7   9   56.90   23.00
  11  -7  -9   75.80   11.20
  11  -7  -9   78.10    8.00
  11  -7  -9   66.20    3.90
 -11   7  10   44.70   10.50
 -11   7  10   68.10   22.90
  11  -7 -10   47.90    8.80
  11  -7 -10   43.30    5.20
  11  -7 -10   44.80    3.30
 -11   7  11   23.00    8.10
 -11   7  11   19.00   14.00
  11  -7 -11   26.70    6.30
  11  -7 -11   30.40    4.60
  11  -7 -11   25.80    2.60
  11  -7 -11   30.90    3.00
 -11   7  12  101.60   16.50
 -11   7  12   92.80   14.50
  11  -7 -12  110.40   14.60
  11  -7 -12  113.20    4.80
  11  -7 -12  107.00    5.40
 -11   7  13   -1.40    3.90
  11  -7 -13    1.30    1.10
  11  -7 -13    2.20    1.60
  11  -7 -14   81.40    3.80
  11  -7 -14   75.30    4.80
 -11   8   1  141.90   18.60
 -11   8   1  152.40    6.20
  11  -8  -1  133.90   17.10
  11  -8  -1  148.20   13.70
  11  -8  -1  134.80    4.60
  11  -8  -1  143.00    6.00
 -11   8   2   47.30    9.90
 -11   8   2   53.30    3.50
  11  -8  -2   57.20    9.40
  11  -8  -2   59.40    5.90
  11  -8  -2   59.10    2.90
  11  -8  -2   53.80    3.50
 -11   8   3   72.50   12.20
 -11   8   3   73.50    4.30
  11  -8  -3   78.60   11.40
  11  -8  -3   67.60    3.20
  11  -8  -3   74.80    4.20
 -11   8   4  160.40   19.80
 -11   8   4  144.20    6.50
  11  -8  -4  152.30   18.30
  11  -8  -4  151.50   14.20
  11  -8  -4  141.90    4.90
  11  -8  -4  149.70    6.10
 -11   8   5   22.90    7.90
 -11   8   5   26.60    3.20
  11  -8  -5   23.90    6.30
  11  -8  -5   25.50    3.50
  11  -8  -5   20.20    1.80
  11  -8  -5   29.00    2.70
 -11   8   6  147.40   17.10
 -11   8   6  154.50    8.40
  11  -8  -6  154.90   14.80
  11  -8  -6  166.20    5.60
  11  -8  -6  161.80    6.50
 -11   8   7    6.20    5.90
 -11   8   7    5.50    4.10
  11  -8  -7    6.10    3.70
  11  -8  -7    3.50    2.50
  11  -8  -7    2.30    1.20
  11  -8  -7    3.30    1.50
 -11   8   8   98.00   14.70
 -11   8   8  120.90   18.70
  11  -8  -8  101.70   13.50
  11  -8  -8  106.30   10.30
  11  -8  -8   89.60    4.10
  11  -8  -8  107.90    5.20
 -11   8   9    9.10    6.40
 -11   8   9    3.30   18.70
  11  -8  -9    7.20    4.20
  11  -8  -9    6.30    2.50
  11  -8  -9    8.60    1.90
  11  -8  -9    7.30    1.80
 -11   8  10   15.50    7.70
 -11   8  10   17.90   22.50
  11  -8 -10   21.60    6.10
  11  -8 -10   23.10    3.60
  11  -8 -10   26.50    2.80
 -11   8  11   73.80   13.10
 -11   8  11   80.00   21.70
  11  -8 -11   54.90    9.50
  11  -8 -11   64.10    3.90
  11  -8 -11   64.50    4.10
 -11   8  12   25.00    9.40
 -11   8  12   19.90   11.70
  11  -8 -12   25.80    7.10
  11  -8 -12   20.20    2.50
  11  -8 -12   24.60    2.80
  11  -8 -13   79.10    4.00
  11  -8 -13   71.30    4.70
 -11   8  14    3.90    3.30
  11  -8 -14    2.90    1.30
  11  -8 -14    2.40    1.60
 -11   9   1   13.90    7.10
 -11   9   1   12.80    2.00
  11  -9  -1   11.40    4.40
  11  -9  -1   10.30    2.80
  11  -9  -1   16.40    1.60
  11  -9  -1   11.50    1.90
 -11   9   2  131.10    5.80
  11  -9  -2  134.00   16.50
  11  -9  -2  120.30   12.00
  11  -9  -2  136.80    4.90
  11  -9  -2  122.90    5.40
 -11   9   3   59.80   11.80
 -11   9   3   67.60    4.30
  11  -9  -3   70.20   10.50
  11  -9  -3   69.60    6.80
  11  -9  -3   64.50    3.10
  11  -9  -3   59.70    3.70
 -11   9   4   34.60    9.10
  11  -9  -4   25.30    6.30
  11  -9  -4   31.50    3.70
  11  -9  -4   33.20    2.90
 -11   9   5   97.50   15.10
  11  -9  -5   86.00   12.70
  11  -9  -5  105.90   10.00
  11  -9  -5   95.70    4.80
 -11   9   6   19.90    7.20
  11  -9  -6   28.10    6.50
  11  -9  -6   20.50    3.30
  11  -9  -6   26.90    2.70
 -11   9   7  101.60   15.10
  11  -9  -7   98.90   13.40
  11  -9  -7   91.50    9.80
  11  -9  -7  102.60    5.10
 -11   9   8    1.30    5.10
  11  -9  -8    1.00    2.70
  11  -9  -8   -0.10    2.40
  11  -9  -8    3.50    1.60
 -11   9   9   42.60   22.00
  11  -9  -9   50.20    5.30
  11  -9  -9   45.80    3.20
  11  -9  -9   47.70    3.50
 -11   9  10   14.30    6.50
 -11   9  10   35.60   24.40
  11  -9 -10   22.50    2.60
  11  -9 -10   20.00    2.60
 -11   9  11   27.50    8.00
 -11   9  11   29.20   17.70
  11  -9 -11   27.50    6.60
  11  -9 -11   30.30    2.90
  11  -9 -11   28.00    2.90
 -11   9  12  110.80   20.60
  11  -9 -12   95.20    4.50
 -11   9  13    6.70    6.40
  11  -9 -13    0.80    1.30
  11  -9 -13    0.60    1.50
  11  -9 -14   77.40    4.20
  11  -9 -14   70.00    4.80
 -11  10   1  118.40   17.80
 -11  10   1  134.10    5.90
  11 -10  -1  137.40   17.00
  11 -10  -1  137.70    4.80
  11 -10  -1  134.70    5.80
 -11  10   2   30.50    9.60
 -11  10   2   38.50    3.20
  11 -10  -2   28.00    6.40
  11 -10  -2   30.40    4.00
 -11  10   3   88.60   14.70
 -11  10   3   86.60    5.00
  11 -10  -3   97.20   13.40
  11 -10  -3   80.00    8.00
  11 -10  -3   87.60    3.70
  11 -10  -3   83.20    4.40
 -11  10   4   35.80    9.80
 -11  10   4   48.40    4.20
  11 -10  -4   45.20    8.70
  11 -10  -4   42.10    4.60
  11 -10  -4   41.10    2.50
  11 -10  -4   41.80    3.20
 -11  10   5   46.70   10.90
 -11  10   5   57.10    5.00
  11 -10  -5   43.20    8.20
  11 -10  -5   50.80    5.50
  11 -10  -5   47.40    2.70
  11 -10  -5   44.90    3.30
 -11  10   6   72.40   13.40
 -11  10   6   92.90    7.20
  11 -10  -6   75.70   11.00
 -11  10   7    3.60    6.00
 -11  10   7    4.40    4.40
  11 -10  -7    7.10    4.00
  11 -10  -7    2.60    2.30
  11 -10  -7    1.50    1.10
  11 -10  -7    2.60    1.50
 -11  10   8   60.40   11.60
 -11  10   8   79.20   17.40
  11 -10  -8   64.60   10.50
  11 -10  -8   68.70    6.90
  11 -10  -8   66.40    3.60
  11 -10  -8   74.40    4.30
 -11  10   9   13.30    6.20
 -11  10   9   45.40   21.30
  11 -10  -9   17.20    5.30
  11 -10  -9   12.70    2.70
  11 -10  -9   15.90    2.10
  11 -10  -9   12.30    2.00
 -11  10  10   78.80   13.30
 -11  10  10   71.10   27.20
  11 -10 -10   88.50   12.40
  11 -10 -10   99.10    4.80
  11 -10 -10   88.50    4.80
 -11  10  11   67.40   12.20
 -11  10  11   66.40   22.40
  11 -10 -11   82.90   11.80
  11 -10 -11   90.50    4.60
  11 -10 -11   80.40    4.70
 -11  10  12   26.70   13.80
  11 -10 -12   20.00    2.60
  11 -10 -12   17.20    2.60
 -11  10  13   33.80    9.90
  11 -10 -13   65.50    4.60
 -11  10  14   -2.70    3.00
  11 -10 -14    0.80    1.60
  11 -10 -14    1.30    1.60
 -11  11   1    3.10    7.00
 -11  11   1    3.00    1.50
  11 -11  -1    4.20    4.30
  11 -11  -1    4.10    3.00
  11 -11  -1    5.00    1.20
  11 -11  -1    4.30    1.50
 -11  11   2   70.90   14.30
  11 -11  -2   77.20   11.50
  11 -11  -2   64.70    7.00
  11 -11  -2   70.00    4.10
 -11  11   3    2.10    7.70
 -11  11   3    9.10    2.20
  11 -11  -3    7.50    4.50
  11 -11  -3    7.40    2.80
  11 -11  -3    9.80    1.50
  11 -11  -3    9.90    1.80
 -11  11   4   38.50   10.60
 -11  11   4   65.80    5.00
  11 -11  -4   56.30    9.30
  11 -11  -4   54.50    5.90
  11 -11  -4   45.90    2.60
  11 -11  -4   49.50    3.50
 -11  11   5   43.20   11.20
 -11  11   5   69.70    5.70
  11 -11  -5   52.90    9.10
  11 -11  -5   43.20    2.60
  11 -11  -5   47.00    3.30
 -11  11   6   38.70   11.00
 -11  11   6   43.90    5.60
  11 -11  -6   34.20    7.10
  11 -11  -6   36.00    4.40
  11 -11  -6   36.60    2.40
  11 -11  -6   35.00    3.00
 -11  11   7   86.80   14.20
 -11  11   7  107.10   11.00
  11 -11  -7   89.50   12.80
  11 -11  -7   89.20    8.80
 -11  11   8   -2.40    5.40
 -11  11   8    5.00   10.60
  11 -11  -8    3.40    3.30
  11 -11  -8    2.20    2.50
  11 -11  -8    1.80    1.30
  11 -11  -8    2.50    1.40
 -11  11   9   74.20   12.80
 -11  11   9   42.20   19.90
  11 -11  -9   79.90   11.80
  11 -11  -9   77.00    4.70
  11 -11  -9   88.40    4.60
 -11  11  10   17.40    6.80
  11 -11 -10    6.00    3.80
  11 -11 -10    8.70    1.90
 -11  11  11   40.20   20.90
  11 -11 -11   62.80    4.00
  11 -11 -11   62.70    4.20
 -11  11  12   22.30   10.30
  11 -11 -12   52.80    3.60
 -11  11  13    6.70    4.00
  11 -11 -13   11.70    2.20
 -11  12   1  110.80   18.70
 -11  12   1  141.80    6.60
  11 -12  -1  118.90    4.40
 -11  12   2    4.80    1.90
  11 -12  -2    2.80    3.20
  11 -12  -2    1.70    1.10
 -11  12   3   31.90   10.30
 -11  12   3   62.00    4.80
  11 -12  -3   54.60    9.50
  11 -12  -3   45.20    5.30
 -11  12   4   16.80    9.00
 -11  12   4   11.80    2.70
  11 -12  -4    5.90    4.00
  11 -12  -4    9.20    2.90
  11 -12  -4   12.30    1.60
 -11  12   5   65.90   13.40
 -11  12   5   97.40    7.10
  11 -12  -5   81.70   11.60
  11 -12  -5   76.20    7.70
  11 -12  -5   59.80    3.10
 -11  12   6   50.20   11.80
 -11  12   6   78.00    7.80
  11 -12  -6   63.00   10.50
  11 -12  -6   68.40    7.10
  11 -12  -6   64.40    3.30
 -11  12   7   18.20    8.10
 -11  12   7   21.60    7.10
  11 -12  -7   15.70    5.40
  11 -12  -7   17.50    3.50
  11 -12  -7   13.40    1.80
 -11  12   8  108.20   16.50
 -11  12   8   69.90   16.80
  11 -12  -8  103.90   13.90
  11 -12  -8  110.10    4.90
 -11  12   9    1.70    6.10
 -11  12   9   -5.80   11.90
  11 -12  -9   -0.60    3.10
  11 -12  -9    0.80    1.40
  11 -12 -10   63.20    4.00
 -11  12  11    3.50   12.30
  11 -12 -11   14.90    2.50
 -11  12  12    9.30    5.70
  11 -12 -12   53.60    4.10
 -11  13   1    5.50    7.40
  11 -13  -1   -0.80    3.40
  11 -13  -1    2.40    3.10
 -11  13   2   65.30   13.30
  11 -13  -2   83.70   12.30
 -11  13   3    7.90    7.70
  11 -13  -3    3.40    3.80
  11 -13  -3    1.10    3.00
 -11  13   4   66.50   12.90
  11 -13  -4   82.00   12.40
  11 -13  -4   93.60    9.70
 -11  13   5   12.20    3.50
  11 -13  -5   15.00    3.50
  11 -13  -5   21.40    2.10
 -11  13   6   40.90   11.10
 -11  13   6   59.80    6.80
  11 -13  -6   56.80    9.20
  11 -13  -6   62.50    3.50
 -11  13   7   41.80    9.90
 -11  13   7   43.90    9.30
  11 -13  -7   62.60   10.20
  11 -13  -7   48.70    3.30
 -11  13   8    2.80    5.80
 -11  13   8    4.40   11.00
  11 -13  -8    2.30    3.10
 -11  14   1   10.60    6.90
  11 -14  -1   23.10    7.50
  11 -14  -1   17.90    4.80
 -11  14   2   -3.30    6.30
  11 -14  -2    2.50    4.40
  11 -14  -2    1.30    3.50
 -11  14   3   37.90   10.80
  11 -14  -3   70.30   12.30
  11 -14  -3   71.60    8.20
 -11  14   4    0.30    5.40
  11 -14  -4    2.60    3.40
  11 -14  -4    0.90    3.50
 -11  14   5   40.60    9.90
  11 -14  -5   60.10    9.90
 -11  14   6   18.60    7.10
  11 -14  -6   19.70    6.30
  10  17  -1   91.80   10.30
 -10 -16   1    3.40    3.80
  10  16  -1    1.30    3.00
  10  16  -2  200.20   20.40
  10  16  -3   31.30    5.70
 -10 -15   1  152.90   20.10
  10  15  -1  161.00   16.90
 -10 -15   2    3.80    3.90
  10  15  -2    2.50    3.10
  10  15  -3  124.50   13.80
  10  15  -4   25.30    5.50
 -10 -14   1   15.00    5.30
  10  14  -1   19.00    4.70
 -10 -14   2  138.90   18.00
  10  14  -2  156.40   16.60
 -10 -14   3    2.60    3.70
  10  14  -3    1.50    3.10
 -10 -14   4   50.10    9.00
  10  14  -4   42.40    7.00
  10  14  -5    8.70    4.30
 -10 -13   1   78.80   11.70
  10  13  -1   82.20    9.90
  10  13  -1   72.60   13.80
  10  13  -2   16.60    4.70
 -10 -13   3   82.30   12.20
  10  13  -3   78.40   10.00
 -10 -13   4    2.30    3.60
  10  13  -4    2.70    3.10
 -10 -13   5   69.00   11.00
  10  13  -5   87.30   10.90
  10  13  -6   67.70    9.40
  10  13  -7   27.50    6.20
 -10 -12   1  100.20   13.70
  10  12  -1   97.50   11.60
  10  12  -1  107.90   15.10
 -10 -12   2  120.20   15.70
  10  12  -2  119.50   16.80
 -10 -12   3    8.40    4.40
  10  12  -3    9.30    3.90
 -10 -12   4   83.50   12.20
  10  12  -4   82.10   10.70
 -10 -12   5    1.80    3.50
  10  12  -5    0.10    3.20
 -10 -12   6  140.90   17.90
  10  12  -6  152.80   17.50
  10  12  -7   78.50   10.90
  10  12  -8   41.70    7.60
 -10 -11   1  125.20   16.10
  10  11  -1  136.80   15.10
  10  11  -1  126.50   16.60
 -10 -11   2   39.30    7.80
  10  11  -2   46.40    7.10
  10  11  -2   37.30    8.60
 -10 -11   3  114.50   15.00
  10  11  -3  115.20   13.60
  10  11  -3  109.50   15.50
 -10 -11   4    4.80    3.90
  10  11  -4    1.70    3.20
 -10 -11   5  156.80   19.20
  10  11  -5  182.00   19.70
 -10 -11   6   19.70    6.00
  10  11  -6   18.40    4.90
 -10 -11   7  121.90   15.80
  10  11  -7  124.20   15.80
  10  11  -8   47.40    8.60
  10  11  -9   10.00    4.80
 -10 -10   1  157.80   19.50
  10  10  -1  121.60   14.60
  10  10  -1  137.10   17.60
 -10 -10   2  125.80   15.90
  10  10  -2  120.50   14.40
  10  10  -2  121.10   15.90
 -10 -10   3   19.20    5.30
  10  10  -3   17.20    4.90
  10  10  -3   11.80    5.80
 -10 -10   4  180.10   21.20
  10  10  -5    1.40    3.60
 -10 -10   6  126.60   16.60
  10  10  -6  150.20   17.50
 -10 -10   7   41.00    8.10
  10  10  -7   36.80    7.10
 -10 -10   8   54.40    9.30
  10  10  -8   68.80   10.70
  10  10  -9   80.90   12.20
  10   9  -1   78.40   10.60
 -10  -9   2   83.70   11.70
  10   9  -2   85.80   11.30
  10   9  -2   76.90   11.70
 -10  -9   3  118.20   15.00
  10   9  -3  109.60   13.80
  10   9  -3  115.20   15.30
 -10  -9   4   31.70    6.60
  10   9  -4   38.80    7.40
  10   9  -4   31.40    7.80
 -10  -9   5  296.70   32.00
  10   9  -5  304.10   31.80
  10   9  -5  279.20   31.40
 -10  -9   6   35.30    7.40
  10   9  -6   27.90    6.60
 -10  -9   7   99.40   13.30
  10   9  -7   98.10   13.30
 -10  -9   8   21.00    5.80
  10   9  -8   20.00    6.00
 -10  -9   9   52.10    8.70
  10   9  -9   51.50    9.80
  10   9 -10  143.60   18.40
  10   8  -1  147.80   17.20
 -10  -8   2  127.60   16.00
  10   8  -2  121.20   14.90
 -10  -8   3   51.90    8.70
  10   8  -3   54.50    8.50
  10   8  -3   51.80    9.60
 -10  -8   4  253.10   27.60
  10   8  -4  227.80   25.30
  10   8  -4  245.50   27.20
 -10  -8   5    6.80    3.80
  10   8  -5    5.40    3.60
  10   8  -5    6.00    4.80
 -10  -8   6  203.90   23.20
  10   8  -6  210.90   23.50
  10   8  -6  198.60   23.30
 -10  -8   7   49.40    8.40
  10   8  -7   37.20    7.50
 -10  -8   8   71.70   10.40
  10   8  -8   50.60    9.00
 -10  -8   9   27.70    6.70
  10   8  -9   21.30    6.50
  10   8 -10   48.00    9.20
  10   8 -11  108.30   15.10
  10   7  -1   54.90    8.50
  10   7  -2  168.90   19.20
 -10  -7   3  267.70   29.10
  10   7  -3  265.30   28.50
  10   7  -3  273.80   29.50
 -10  -7   4   79.00   11.30
  10   7  -4   73.50   10.40
  10   7  -4   68.40   10.90
 -10  -7   5  235.10   25.80
  10   7  -5  227.20   24.90
  10   7  -5  222.30   25.00
 -10  -7   6   16.60    4.90
  10   7  -6   22.10    5.80
  10   7  -6   11.90    5.60
 -10  -7   7  176.80   20.40
  10   7  -7  175.50   21.00
 -10  -7   8   29.10    7.40
  10   7  -8   29.10    6.80
 -10  -7   9  119.00   14.60
  10   7  -9  128.60   16.20
 -10  -7  10   91.60   12.10
  10   7 -11   24.30    7.20
  10   7 -12   59.70   12.00
 -10  -6   1  322.30   33.80
 -10  -6   1  326.20   33.80
  10   6  -1  320.80   33.30
  10   6  -1  336.20   34.50
  10   6  -1  327.20    7.30
 -10  -6   2   81.00   11.30
  10   6  -2   80.20   11.00
 -10  -6   3  194.30   22.40
  10   6  -3  213.30   23.50
 -10  -6   4  257.00   28.10
 -10  -6   4  268.10   28.90
  10   6  -4  270.20   28.80
  10   6  -4  268.20   28.60
 -10  -6   5   54.60   10.10
  10   6  -5   48.80    8.30
 -10  -6   6   89.90   12.10
 -10  -6   6   72.00   12.10
  10   6  -6   83.00   11.60
  10   6  -6   77.20   10.90
 -10  -6   7   12.80    4.40
 -10  -6   7   13.40    5.70
  10   6  -8  182.20   21.00
  10   6  -8  194.60   22.60
 -10  -6   9   35.20    6.70
 -10  -6   9   32.60    8.90
  10   6  -9   41.50    8.20
 -10  -6  10   56.00    8.40
 -10  -6  10   61.40   12.30
  10   6 -10   72.10   11.00
 -10  -6  11   79.70   10.70
  10   6 -11   70.90   11.50
  10   6 -12   26.80    7.30
 -10  -5   1   14.10    4.40
 -10  -5   1   18.00    5.80
 -10  -5   1   16.80    1.30
 -10  -5   1   11.40    1.30
  10   5  -1   13.80    4.60
  10   5  -1   10.10    4.50
  10   5  -1   16.00    1.10
 -10  -5   2  190.90   21.00
 -10  -5   2  183.40   20.50
  10   5  -2  172.00   19.70
  10   5  -2  201.20   21.80
  10   5  -2  177.30    4.10
  10   5  -2  180.00    4.20
 -10  -5   3   41.00    8.10
  10   5  -3   36.20    6.90
 -10  -5   5  121.00   15.00
 -10  -5   5  148.10   17.80
  10   5  -5  128.20   15.70
  10   5  -5  128.20   15.40
 -10  -5   6   -2.10    3.00
 -10  -5   6    2.50    4.90
  10   5  -6    3.80    3.50
  10   5  -6    3.20    4.50
 -10  -5   7  103.90   13.30
 -10  -5   7  102.40   14.50
  10   5  -7  100.80   13.30
  10   5  -7  109.30   14.10
 -10  -5   8   -0.60    2.70
 -10  -5   8    3.20    5.70
  10   5  -8    0.50    3.10
  10   5  -8   -1.80    4.40
 -10  -5   9  169.90   19.20
 -10  -5   9  176.20   21.70
  10   5  -9  158.10   19.30
 -10  -5  10  126.20   15.10
 -10  -5  10  132.50   18.20
  10   5 -10  128.20   16.30
 -10  -5  11   17.10    4.70
  10   5 -11   22.60    7.70
 -10  -5  12   97.50   15.20
  10   5 -12  109.90   15.30
 -10  -5  13    8.70    5.80
  10   5 -13   13.90    6.30
 -10  -4   1  312.60   32.70
 -10  -4   1  319.20    7.90
  10   4  -1  334.90   34.10
  10   4  -1  326.80    8.00
 -10  -4   2   30.70    5.60
 -10  -4   2   34.70    6.80
 -10  -4   2   36.60    1.80
 -10  -4   2   34.40    1.90
  10   4  -2   45.30    7.40
  10   4  -2   36.10    6.80
  10   4  -2   39.50    1.60
  10   4  -2   35.50    1.60
 -10  -4   3  104.70   13.20
 -10  -4   3  112.90    4.80
 -10  -4   3  108.30    3.50
  10   4  -3   94.20   12.10
  10   4  -3  102.80   13.00
  10   4  -3   82.90    2.20
  10   4  -3   89.60    2.50
 -10  -4   4   58.10    9.50
  10   4  -4   68.10    9.70
 -10  -4   5  200.40   22.20
 -10  -4   5  194.50   22.40
  10   4  -5  210.70   23.10
 -10  -4   6  215.90   23.80
  10   4  -6  172.20   20.30
 -10  -4   7    2.10    2.50
 -10  -4   7    5.30    5.00
  10   4  -7    2.90    3.40
  10   4  -7    4.40    4.20
 -10  -4   8  204.20   22.10
 -10  -4   8  203.70   23.70
  10   4  -8  179.70   21.20
  10   4  -8  199.60   21.80
 -10  -4   9   16.70    4.60
 -10  -4   9   22.00    7.60
  10   4  -9   19.10    5.40
  10   4  -9   11.30    5.30
 -10  -4  10   99.00   12.40
 -10  -4  10  103.80   15.00
  10   4 -10   95.50   13.10
 -10  -4  11   66.30    9.50
 -10  -4  11   61.50   12.30
  10   4 -11   81.50   11.90
 -10  -4  12   48.40    7.60
 -10  -4  12   45.10   10.50
  10   4 -12   50.60    9.30
 -10  -4  13  102.70   16.60
  10   4 -13  108.80   15.10
 -10  -3   1   30.90    5.30
 -10  -3   1   29.20    6.50
 -10  -3   1   29.70    1.90
  10   3  -1   25.10    5.50
  10   3  -1   26.90    6.00
  10   3  -1   28.70    1.80
 -10  -3   2  377.00   38.90
 -10  -3   2  394.70   40.20
 -10  -3   2  379.10    9.00
  10   3  -2  388.40   40.10
  10   3  -2  424.50   41.40
  10   3  -2  416.20    9.50
  10   3  -2  415.90   10.10
 -10  -3   3   74.60   10.10
 -10  -3   3   82.20   11.40
 -10  -3   3   82.00    3.30
  10   3  -3   85.30   11.30
  10   3  -3   87.40   11.20
  10   3  -3   84.80    2.60
  10   3  -3   77.80    2.70
 -10  -3   4  146.30   17.10
 -10  -3   4  126.40   10.20
  10   3  -4  133.00   16.00
  10   3  -4  140.90    3.80
  10   3  -5  207.00    4.80
 -10  -3   6  234.00   25.40
 -10  -3   6  266.30   28.40
  10   3  -6  235.70   26.10
  10   3  -6  252.70   26.50
 -10  -3   7  299.70   31.00
 -10  -3   7  312.70   32.90
  10   3  -7  278.60   30.40
  10   3  -7  297.80   30.80
 -10  -3   8    0.70    2.40
 -10  -3   8    0.00    4.20
  10   3  -8    0.20    2.70
  10   3  -8   -1.10    3.40
 -10  -3   9  248.00   25.70
  10   3  -9  221.90   24.50
  10   3 -10   21.30    5.70
 -10  -3  11  104.50   12.70
 -10  -3  11  109.70   16.00
  10   3 -11   99.90   13.50
 -10  -3  12   26.00    5.40
 -10  -3  13   26.80    8.30
  10   3 -13   22.30    6.40
 -10  -2   1  402.60   40.20
 -10  -2   1  407.50   40.80
 -10  -2   1  408.70   10.20
  10   2  -1  382.90   39.70
  10   2  -1  406.90   40.10
  10   2  -1  405.30   10.20
 -10  -2   2    2.10    3.60
  10   2  -2    1.40    2.90
  10   2  -2    0.70    0.70
 -10  -2   3  515.70   51.90
 -10  -2   3  533.30   53.50
 -10  -2   3  552.70   13.10
  10   2  -3  525.30   53.10
  10   2  -3  565.40   54.50
  10   2  -3  563.60   12.50
  10   2  -3  546.40   12.70
 -10  -2   4   67.00    9.00
 -10  -2   4   74.00   10.70
 -10  -2   4   70.70    4.20
  10   2  -4   64.10    9.50
  10   2  -4   63.60    9.10
  10   2  -4   61.50    2.20
  10   2  -4   65.80    2.70
 -10  -2   5  178.50   20.30
  10   2  -5  148.30   17.80
  10   2  -5  158.40    4.40
  10   2  -5  171.30    4.90
 -10  -2   6  114.10   14.90
 -10  -2   6   98.10    4.70
  10   2  -6  118.20   14.50
  10   2  -6  119.80    3.30
 -10  -2   7  115.10   15.00
  10   2  -7   86.30   12.00
  10   2  -7  104.60    2.80
 -10  -2   8  307.40   31.50
 -10  -2   8  311.40   33.20
  10   2  -8  304.10   32.30
  10   2  -8  294.90   30.50
 -10  -2   9   16.40    4.40
 -10  -2   9   16.30    6.60
  10   2  -9   12.20    4.60
  10   2  -9   13.30    4.60
 -10  -2  10  126.10   14.70
 -10  -2  10  132.70   17.40
  10   2 -10  129.00   16.20
 -10  -2  11   26.60    5.50
 -10  -2  11   26.40    8.20
  10   2 -11   19.30    5.50
 -10  -2  12   96.70   11.50
 -10  -2  12   84.80   14.30
  10   2 -12   78.70   11.50
 -10  -2  13   53.10   10.90
  10   2 -13   53.30    9.40
 -10  -2  14    6.00    6.10
  10   2 -14   10.80    5.20
 -10  -1   1   21.50    6.00
 -10  -1   1   32.50    2.20
  10   1  -1   25.40    5.30
  10   1  -1   23.20    4.90
 -10  -1   2  396.00   39.10
 -10  -1   2  375.80    9.60
  10   1  -2  396.60   39.50
  10   1  -2  344.10    7.90
  10   1  -2  370.30    9.60
 -10  -1   3   39.50    6.30
 -10  -1   3   47.30    8.10
 -10  -1   3   50.70    2.70
  10   1  -3   41.60    7.40
  10   1  -3   49.30    7.40
 -10  -1   4  508.50   50.40
 -10  -1   4  522.50   52.00
  10   1  -4  522.30   52.30
  10   1  -4  545.40   52.10
  10   1  -4  512.30   12.20
 -10  -1   5  117.50   13.60
 -10  -1   5  110.80   14.30
 -10  -1   5  126.90   11.00
  10   1  -5  122.30   15.10
  10   1  -5  109.80   13.10
  10   1  -5  126.90    4.00
  10   1  -5  113.50    3.90
 -10  -1   6   55.60    9.60
 -10  -1   6   66.40    9.80
  10   1  -6   53.30    8.60
  10   1  -6   55.80    2.50
  10   1  -6   64.90    2.80
 -10  -1   7   92.70   13.60
  10   1  -7  105.80   13.80
  10   1  -7  106.40    3.20
  10   1  -7  110.60    3.80
 -10  -1   8   10.50    3.80
 -10  -1   8   11.50    5.70
 -10  -1   8    9.20    1.40
  10   1  -8    5.60    3.30
  10   1  -8    6.60    4.00
  10   1  -8   10.30    1.00
  10   1  -8   10.00    1.10
 -10  -1   9  224.00   23.60
 -10  -1   9  236.30   26.40
  10   1  -9  200.50   23.30
  10   1  -9  224.80   23.20
  10   1  -9  232.40    5.60
  10   1  -9  221.20    5.50
 -10  -1  10   19.10    4.50
 -10  -1  10   20.20    7.10
  10   1 -10   14.50    4.70
  10   1 -10   15.70    5.90
 -10  -1  11   78.50    9.90
 -10  -1  11   64.50   11.80
  10   1 -11   80.50   11.40
 -10  -1  12   26.90    5.30
 -10  -1  12   24.40    8.10
  10   1 -12   22.10    5.80
 -10  -1  13   60.40    8.10
 -10  -1  13   48.50   10.90
  10   1 -13   70.00   10.40
 -10  -1  14   99.60   15.90
  10   1 -14  113.10   15.10
 -10   0   1  490.90   48.80
 -10   0   1  545.60   52.70
 -10   0   1  505.80   12.20
  10   0  -1  525.00   52.30
  10   0  -1  540.10   51.10
  10   0  -1  511.40   12.60
 -10   0   2   18.60    4.20
 -10   0   2   20.30    5.70
 -10   0   2   19.30    1.70
  10   0  -2   21.10    5.40
  10   0  -2   25.00    6.00
  10   0  -2   15.70    1.20
  10   0  -2   22.20    1.90
 -10   0   3  281.20   29.00
 -10   0   3  293.50   30.80
 -10   0   3  292.90    8.10
  10   0  -3  289.80   31.20
  10   0  -3  319.00   31.00
  10   0  -3  305.20    7.60
 -10   0   4    0.90    2.10
 -10   0   4    2.90    3.80
 -10   0   4    0.90    1.00
  10   0  -4   -0.10    2.60
  10   0  -4    1.30    3.20
  10   0  -4    2.20    0.70
  10   0  -4    1.90    0.90
 -10   0   5  241.00   24.90
 -10   0   5  262.40   27.50
 -10   0   5  243.00    9.80
  10   0  -5  245.30   26.80
  10   0  -5  253.30   25.30
  10   0  -5  227.20    5.90
  10   0  -5  241.40    7.00
 -10   0   6   77.30   10.80
 -10   0   6   68.80   11.00
 -10   0   6   75.80   13.80
  10   0  -6   66.40   10.10
  10   0  -6   72.30    9.10
  10   0  -6   70.00    3.00
  10   0  -6   69.70    3.20
 -10   0   7   33.10    7.80
  10   0  -7   40.40    7.40
  10   0  -7   40.30    2.40
 -10   0   8  191.00   20.70
 -10   0   8  205.60   23.30
 -10   0   8  180.50    8.50
  10   0  -8  187.30   21.90
  10   0  -8  185.10   19.80
  10   0  -8  211.40    6.80
 -10   0   9    0.40    2.20
 -10   0   9    3.00    5.30
 -10   0   9    1.90    1.50
  10   0  -9    4.60    3.90
  10   0  -9    8.30    4.00
  10   0  -9    3.90    0.90
  10   0  -9    4.60    1.20
 -10   0  10  183.40   19.30
 -10   0  10  189.10   22.50
 -10   0  10  147.20    4.80
  10   0 -10  176.70   20.60
  10   0 -10  178.30   18.70
  10   0 -10  183.00    5.10
  10   0 -10  175.80    5.30
 -10   0  11    8.70    6.30
  10   0 -11    8.50    4.10
  10   0 -11    8.60    1.10
  10   0 -11   10.90    1.30
  10   0 -12  135.60   16.70
  10   0 -12  124.30    3.50
 -10   0  13   39.90    6.40
 -10   0  13   40.90   10.50
  10   0 -13   43.60    8.10
 -10   0  14   26.20    9.00
  10   0 -14   26.70    6.50
 -10   1   1  232.70   24.20
 -10   1   1  255.70   26.60
 -10   1   1  261.00    7.70
  10  -1  -1  249.90    6.60
  10  -1  -1  252.60    7.60
 -10   1   2  490.80   47.40
 -10   1   2  499.10   48.90
 -10   1   2  494.50   12.50
  10  -1  -2  514.70   50.60
  10  -1  -2  473.80   45.90
  10  -1  -2  460.80   10.50
  10  -1  -2  469.80   11.90
 -10   1   3    7.80    2.70
 -10   1   3   11.60    5.00
 -10   1   3   11.00    1.50
  10  -1  -3   13.70    4.50
  10  -1  -3   12.50    3.80
  10  -1  -3   13.10    1.20
  10  -1  -3   12.30    1.60
 -10   1   4  229.20   24.10
 -10   1   4  248.30   26.50
 -10   1   4  252.40    7.90
  10  -1  -4  240.60   26.50
  10  -1  -4  246.00   24.50
 -10   1   5   35.90    5.70
 -10   1   5   28.80    6.70
 -10   1   5   32.20    3.20
  10  -1  -5   29.60    6.60
  10  -1  -5   34.00    5.70
  10  -1  -5   29.00    1.70
  10  -1  -5   28.20    2.20
 -10   1   6   94.90   11.10
 -10   1   6  112.30   15.00
 -10   1   6  150.90   14.00
  10  -1  -6  103.20   14.60
  10  -1  -6  106.90   11.70
  10  -1  -6   80.70    3.20
 -10   1   7   91.10   12.70
  10  -1  -7  104.30   13.70
  10  -1  -7   95.20    3.80
 -10   1   8   53.30    9.70
 -10   1   8   48.20    8.60
  10  -1  -8   49.40    8.50
  10  -1  -8   52.70    2.70
  10  -1  -8   50.30    2.80
 -10   1   9  217.10   22.10
 -10   1   9  193.80   22.80
 -10   1   9  184.40    9.10
  10  -1  -9  183.30   21.80
  10  -1  -9  194.30   20.20
  10  -1  -9  202.00    5.60
  10  -1  -9  198.10    6.30
 -10   1  10   10.40    3.70
 -10   1  10    4.70    6.20
 -10   1  10    8.70    2.20
  10  -1 -10   12.00    4.20
  10  -1 -10   12.10    1.30
  10  -1 -10   11.70    1.70
 -10   1  11  226.30   26.40
  10  -1 -11  214.80   24.90
  10  -1 -11  226.70    6.20
  10  -1 -11  230.90    7.00
 -10   1  12   21.40    4.80
 -10   1  12   26.70    8.50
 -10   1  12    9.90    1.80
  10  -1 -12   22.10    6.20
  10  -1 -12   17.60    2.00
 -10   1  13  110.70   12.80
 -10   1  13  114.60   16.90
  10  -1 -13  106.10   14.10
  10  -1 -13  103.30    3.80
  10  -1 -13  105.70    4.10
 -10   1  14   61.90   12.00
  10  -1 -14   64.80   10.00
 -10   2   1  114.30   12.20
 -10   2   1  110.30   13.40
 -10   2   1  104.10    4.30
  10  -2  -1  102.00   13.10
  10  -2  -1  101.00   10.90
  10  -2  -1  107.80    3.70
  10  -2  -1  101.90    4.30
 -10   2   2  159.00   17.10
 -10   2   2  183.20   19.90
 -10   2   2  175.30    5.90
  10  -2  -2  177.20   20.20
  10  -2  -2  171.70    5.00
  10  -2  -2  169.00    5.80
 -10   2   3  428.80   41.50
 -10   2   3  434.10   43.20
 -10   2   3  438.30   11.60
  10  -2  -3  411.90   42.50
  10  -2  -3  436.40   41.30
  10  -2  -3  406.20    9.60
  10  -2  -3  412.70   10.80
 -10   2   4   54.30    3.20
  10  -2  -4   68.80   10.00
  10  -2  -4   56.10    7.20
  10  -2  -4   55.90    2.50
  10  -2  -4   52.00    3.00
 -10   2   5  195.20   20.70
 -10   2   5  215.10   23.50
 -10   2   5  205.90    7.80
  10  -2  -5  206.10   23.30
  10  -2  -5  223.40   21.90
  10  -2  -5  213.70    6.00
  10  -2  -5  210.80    6.80
 -10   2   6   34.50    5.60
 -10   2   6   23.80    6.50
 -10   2   6   41.30    5.70
  10  -2  -6   35.30    7.30
  10  -2  -6   27.60    4.80
  10  -2  -6   38.00    2.20
  10  -2  -6   38.80    2.60
 -10   2   7  115.20   13.10
 -10   2   7  128.20   15.90
 -10   2   7   99.60   17.00
  10  -2  -7  122.00   15.50
  10  -2  -7  116.80   12.60
  10  -2  -7  114.80    4.40
  10  -2  -7  117.00    4.70
 -10   2   8  245.70   26.80
 -10   2   8  235.70   22.90
  10  -2  -8  229.70   25.80
  10  -2  -8  233.10    7.00
  10  -2  -8  228.70    7.10
 -10   2   9   56.70   10.30
 -10   2   9   55.90    8.40
  10  -2  -9   50.80    8.80
 -10   2  10  221.40   23.00
 -10   2  10  200.00    9.70
  10  -2 -10  228.00   22.60
  10  -2 -10  210.80    5.90
  10  -2 -10  219.10    7.10
 -10   2  11   23.40    7.50
 -10   2  11   13.00    2.70
  10  -2 -11   19.80    5.50
  10  -2 -11   21.50    1.80
  10  -2 -11   23.10    2.30
 -10   2  12  128.40   14.70
 -10   2  12  139.10   18.20
 -10   2  12  116.20    5.40
  10  -2 -12  118.20   15.80
  10  -2 -12  136.40    4.70
  10  -2 -12  132.50    5.30
 -10   2  13   41.50    6.70
 -10   2  13   25.30    8.20
 -10   2  13   18.90    2.60
  10  -2 -13   31.10    7.20
  10  -2 -13   38.60    2.50
 -10   2  14   37.00    9.50
  10  -2 -14   43.40    8.30
  10  -2 -14   40.00    2.70
  10  -2 -14   41.00    3.30
 -10   3   1   43.30    6.20
 -10   3   1   55.40    8.50
 -10   3   1   54.60    3.10
  10  -3  -1   43.00    7.20
  10  -3  -1   54.50    6.20
  10  -3  -1   41.80    2.10
  10  -3  -1   53.00    3.10
 -10   3   2  264.20   27.60
 -10   3   2  273.90    8.30
  10  -3  -2  263.80   28.00
  10  -3  -2  243.50    6.40
  10  -3  -2  246.60    7.60
 -10   3   3  158.10   16.80
 -10   3   3  177.10   19.60
  10  -3  -3  159.70   18.70
  10  -3  -3  163.90   16.30
  10  -3  -3  154.20    5.60
 -10   3   4  187.90   19.70
 -10   3   4  190.30   22.50
  10  -3  -4  184.10   21.30
  10  -3  -4  199.20   19.40
  10  -3  -4  189.50    6.40
 -10   3   5   36.80    5.60
 -10   3   5   32.70    7.10
 -10   3   5   36.20    3.20
  10  -3  -5   44.00    7.80
  10  -3  -5   35.60    5.20
  10  -3  -5   27.20    1.70
  10  -3  -5   36.70    2.60
 -10   3   6  201.50   21.20
 -10   3   6  212.50   23.60
 -10   3   6  192.90    9.30
  10  -3  -6  231.10   25.10
  10  -3  -6  218.70   21.30
  10  -3  -6  208.40    6.00
  10  -3  -6  214.50    7.00
 -10   3   7   32.50    5.80
 -10   3   7   30.50    7.30
 -10   3   7   30.80   10.60
  10  -3  -7   38.30    7.40
  10  -3  -7   37.00    5.70
  10  -3  -7   36.50    2.40
  10  -3  -7   36.60    2.60
 -10   3   8  194.30   21.00
 -10   3   8  198.90   23.10
  10  -3  -8  194.60   22.60
  10  -3  -8  213.20   20.90
  10  -3  -8  212.00    6.70
  10  -3  -8  203.70    6.80
 -10   3   9  182.20   21.30
 -10   3   9  178.90   18.20
  10  -3  -9  175.10   20.50
  10  -3  -9  176.30    6.00
  10  -3  -9  165.80    5.90
 -10   3  10   25.50    7.60
 -10   3  10   27.30    5.80
  10  -3 -10   25.60    6.30
  10  -3 -10   27.40    2.20
  10  -3 -10   29.60    2.60
 -10   3  11  207.60   23.70
 -10   3  11  170.40    9.00
  10  -3 -11  185.60   21.90
  10  -3 -11  188.60    5.70
  10  -3 -11  187.70    6.60
 -10   3  12   14.80    4.30
 -10   3  12   15.50    7.10
 -10   3  12   10.30    2.60
  10  -3 -12   13.50    4.80
  10  -3 -12   14.30    1.70
  10  -3 -12   12.50    2.00
 -10   3  13   60.90    8.30
 -10   3  13   52.30   11.00
 -10   3  13   44.10    3.80
  10  -3 -13   50.50    2.70
  10  -3 -13   55.50    3.60
 -10   3  14   37.30    9.90
 -10   3  14   13.70    2.70
  10  -3 -14   28.20    6.70
  10  -3 -14   29.70    2.30
  10  -3 -14   32.70    3.00
 -10   4   1  166.90   17.00
 -10   4   1  149.80   17.50
 -10   4   1  140.90    5.20
  10  -4  -1  147.40   17.40
  10  -4  -1  145.00   14.10
  10  -4  -1  156.10    4.90
 -10   4   2  146.30   17.00
 -10   4   2  134.60    5.20
  10  -4  -2  133.30   16.10
  10  -4  -2  131.80    4.30
 -10   4   3  198.60   20.50
 -10   4   3  184.10   20.90
 -10   4   3  182.90    6.30
  10  -4  -3  195.80   21.90
  10  -4  -3  181.20   17.80
  10  -4  -3  206.80    6.10
  10  -4  -3  179.40    6.20
 -10   4   4   43.40    6.40
 -10   4   4   53.80    9.10
 -10   4   4   54.00    3.40
  10  -4  -4   47.80    8.20
  10  -4  -4   51.30    6.00
  10  -4  -4   48.30    2.40
  10  -4  -4   53.60    3.20
 -10   4   5  264.50    9.20
  10  -4  -5  255.40   27.90
  10  -4  -5  253.60   24.40
  10  -4  -5  257.80    7.10
  10  -4  -5  242.80    7.60
 -10   4   6    5.70    2.90
 -10   4   6    1.40    3.90
 -10   4   6    5.90    2.20
  10  -4  -6    5.40    3.60
  10  -4  -6    2.10    2.40
  10  -4  -6    2.40    0.90
  10  -4  -6    2.70    1.20
 -10   4   7  200.60   22.70
  10  -4  -7  200.50   22.60
  10  -4  -7  184.60    5.90
  10  -4  -7  194.90    6.70
 -10   4   8   87.30   10.90
 -10   4   8   77.90   12.20
 -10   4   8   89.40   19.20
  10  -4  -8   77.30   11.40
  10  -4  -8   87.50    9.30
  10  -4  -8   96.10    4.30
  10  -4  -8   89.20    4.30
 -10   4   9   78.20   10.10
 -10   4   9   88.50   13.00
  10  -4  -9   64.90   10.20
  10  -4  -9   67.50    7.70
  10  -4  -9   76.10    3.80
  10  -4  -9   78.30    4.10
 -10   4  10   86.50   13.00
 -10   4  10   96.00   14.00
  10  -4 -10   81.70   11.70
  10  -4 -10   77.00    3.90
  10  -4 -10   82.10    4.20
 -10   4  11    9.20    6.10
 -10   4  11    9.00    4.10
  10  -4 -11    8.90    4.40
  10  -4 -11    6.90    1.50
  10  -4 -11    6.30    1.70
 -10   4  12  124.00    7.60
  10  -4 -12  134.60   17.20
  10  -4 -12  154.10    5.20
  10  -4 -12  142.70    5.90
 -10   4  13   32.40    5.90
 -10   4  13   28.50    8.30
 -10   4  13   20.10    3.10
  10  -4 -13   35.90    7.50
  10  -4 -13   31.00    2.20
  10  -4 -13   35.70    3.00
 -10   4  14   42.50   10.20
 -10   4  14   33.70    3.60
  10  -4 -14   41.70    7.90
  10  -4 -14   45.30    2.80
  10  -4 -14   46.70    3.70
 -10   5   1  185.70   19.60
 -10   5   1  214.20   23.00
 -10   5   1  210.30    7.00
  10  -5  -1  203.60   22.50
  10  -5  -1  199.30   18.70
  10  -5  -1  195.00    5.70
  10  -5  -1  190.00    6.70
 -10   5   2   78.00    9.30
 -10   5   2   75.90   10.90
 -10   5   2   83.30    4.00
  10  -5  -2   85.70   11.50
  10  -5  -2   78.30    7.80
  10  -5  -2   73.30    2.90
  10  -5  -2   71.20    3.70
 -10   5   3  120.50   13.30
 -10   5   3  116.80   14.50
 -10   5   3  111.50    4.70
  10  -5  -3  111.10   14.20
  10  -5  -3  119.40   11.60
  10  -5  -3  115.40    4.10
  10  -5  -3  119.40    5.00
 -10   5   4  149.20   15.90
 -10   5   4  140.90   17.00
 -10   5   4  127.40    5.30
  10  -5  -4  140.70   17.10
  10  -5  -4  159.00   14.90
  10  -5  -4  148.10    4.90
  10  -5  -4  139.80    5.40
 -10   5   5    4.10    2.60
 -10   5   5    6.00    1.80
  10  -5  -5   10.30    3.00
  10  -5  -5    5.60    1.10
  10  -5  -5    8.70    1.60
 -10   5   6  353.60   37.70
 -10   5   6  368.00   13.00
  10  -5  -6  340.00   36.30
  10  -5  -6  333.10   32.10
 -10   5   7   23.20    4.90
 -10   5   7   26.90    6.90
 -10   5   7   28.70    6.00
  10  -5  -7   25.40    6.10
  10  -5  -7   20.70    3.80
  10  -5  -7   23.50    2.00
  10  -5  -7   21.40    2.30
 -10   5   8  164.70   18.20
 -10   5   8  173.30   20.70
 -10   5   8  146.90   19.70
  10  -5  -8  173.10   20.60
  10  -5  -8  176.80   17.30
  10  -5  -8  185.80    6.30
  10  -5  -8  184.50    6.70
 -10   5   9   87.60   10.60
 -10   5   9   90.50   13.30
 -10   5   9   65.00   18.80
  10  -5  -9   93.90   12.80
  10  -5  -9   82.20    8.80
  10  -5  -9   81.10    4.00
  10  -5  -9   86.40    4.40
 -10   5  10   38.90    9.00
 -10   5  10   31.40   12.70
  10  -5 -10   42.10    7.80
  10  -5 -10   33.30    2.80
  10  -5 -10   37.10    3.00
 -10   5  11  135.90   17.60
  10  -5 -11  119.40   15.70
  10  -5 -11  119.00    4.70
  10  -5 -11  134.60    5.90
 -10   5  12    4.10    5.30
 -10   5  12   -1.70    3.40
  10  -5 -12   -0.40    2.60
  10  -5 -12    0.30    1.10
  10  -5 -12    0.00    1.40
 -10   5  13  120.40   13.70
 -10   5  13  116.00   16.80
 -10   5  13   97.30    7.00
  10  -5 -13  123.90   15.60
  10  -5 -13  115.40    4.30
  10  -5 -13  117.50    5.60
 -10   5  14   20.50    8.20
 -10   5  14    9.30    2.70
  10  -5 -14   16.30    5.20
  10  -5 -14   20.90    2.10
  10  -5 -14   15.60    2.40
  10  -5 -15   60.30    3.30
  10  -5 -15   66.50    4.50
 -10   6   1    3.40    4.40
 -10   6   1    1.70    1.10
  10  -6  -1   -1.50    2.30
 -10   6   2  157.40    6.00
  10  -6  -2  143.40   17.10
  10  -6  -2  145.70   13.60
  10  -6  -2  143.60    4.70
  10  -6  -2  143.20    5.60
 -10   6   3  129.70   14.20
 -10   6   3  132.40   16.00
 -10   6   3  115.60    5.00
  10  -6  -3  131.40   15.80
  10  -6  -3  121.50   11.70
  10  -6  -3  124.60    4.30
  10  -6  -3  118.60    5.00
 -10   6   4   22.20    2.40
  10  -6  -4   16.00    4.90
  10  -6  -4   25.40    3.70
  10  -6  -4   15.30    1.60
  10  -6  -4   19.70    2.10
 -10   6   5  196.40   20.60
 -10   6   5  188.40   21.60
 -10   6   5  179.50    7.10
  10  -6  -5  204.10   22.90
  10  -6  -5  209.80   19.50
  10  -6  -5  210.70    6.30
  10  -6  -5  196.50    6.90
 -10   6   6    0.00    2.60
 -10   6   6   -3.10    4.30
 -10   6   6    0.70    1.60
  10  -6  -6    0.40    2.60
  10  -6  -6    1.10    2.20
  10  -6  -6   -0.20    0.90
  10  -6  -6    0.50    1.10
 -10   6   7  343.60   34.60
 -10   6   7  340.70   36.00
 -10   6   7  394.80   17.90
  10  -6  -7  350.10   36.70
  10  -6  -7  363.80   33.60
  10  -6  -7  318.40    8.50
  10  -6  -7  358.80   10.60
 -10   6   8   73.00    9.40
 -10   6   8   57.70   10.20
 -10   6   8   66.60   14.40
  10  -6  -8   73.30   10.80
  10  -6  -8   68.80    7.20
  10  -6  -8   59.40    3.30
  10  -6  -8   67.70    3.90
 -10   6   9   64.90    8.80
 -10   6   9   70.00   20.50
  10  -6  -9   67.70    7.30
  10  -6  -9   63.50    3.70
  10  -6  -9   67.70    3.90
 -10   6  10   80.30   13.10
  10  -6 -10   93.50   12.80
  10  -6 -10   97.50    9.90
  10  -6 -10  100.30    4.70
  10  -6 -10   89.40    4.60
 -10   6  11   18.30    7.20
 -10   6  11   20.70   11.00
  10  -6 -11   26.40    6.30
  10  -6 -11   14.40    2.10
  10  -6 -11   20.90    2.50
 -10   6  12  103.80   15.90
 -10   6  12  112.80   10.90
  10  -6 -12   92.30   13.10
  10  -6 -12   98.70    4.20
  10  -6 -12   99.50    5.00
 -10   6  13    0.50    5.60
 -10   6  13    2.40    3.70
  10  -6 -13    4.80    3.70
  10  -6 -13    3.40    1.70
 -10   6  14  154.40   20.50
  10  -6 -14  148.20   17.90
  10  -6 -14  129.20    4.70
  10  -6 -14  138.50    6.30
  10  -6 -15    2.80    1.40
  10  -6 -15    2.90    1.90
 -10   7   1  161.20   18.40
 -10   7   1  147.60    5.80
  10  -7  -1  143.20   17.10
  10  -7  -1  148.10   13.70
 -10   7   2    3.50    4.10
 -10   7   2    6.60    1.50
  10  -7  -2    7.40    4.00
  10  -7  -2    7.80    2.30
  10  -7  -2    6.90    1.20
  10  -7  -2    8.30    1.60
 -10   7   3  102.10   12.30
 -10   7   3  100.60   13.70
 -10   7   3  119.90    5.40
  10  -7  -3  112.90   14.20
  10  -7  -3  118.70   10.90
  10  -7  -3  112.30    4.20
  10  -7  -3  108.20    4.90
 -10   7   4  192.30   20.30
  10  -7  -4  192.90   17.80
  10  -7  -4  172.40    6.40
 -10   7   5    2.90    2.60
 -10   7   5    8.30    4.90
  10  -7  -5    3.70    3.20
  10  -7  -5    4.50    2.20
  10  -7  -5    3.90    1.40
 -10   7   6  210.70   22.80
 -10   7   6  232.90   25.80
  10  -7  -6  235.80   26.00
  10  -7  -6  247.10   22.70
  10  -7  -6  231.80    7.80
 -10   7   7    7.60    3.50
 -10   7   7    4.90    5.40
  10  -7  -7    5.60    3.70
  10  -7  -7    6.20    2.10
  10  -7  -7    7.30    1.70
 -10   7   8  234.40   24.20
 -10   7   8  240.00   26.60
  10  -7  -8  234.90   26.10
  10  -7  -8  223.60   21.30
  10  -7  -8  225.90    7.80
 -10   7   9   18.90    5.50
 -10   7   9   27.20    7.60
  10  -7  -9   27.60    6.60
  10  -7  -9   21.30    3.60
  10  -7  -9   22.60    2.80
  10  -7  -9   31.20    2.80
 -10   7  10   70.10   11.80
 -10   7  10   42.50   18.60
  10  -7 -10   58.80    9.90
  10  -7 -10   72.30    4.00
  10  -7 -10   67.90    4.10
 -10   7  11  119.60   16.70
 -10   7  11  118.80   19.50
  10  -7 -11  128.20   16.10
 -10   7  12    9.10    7.40
  10  -7 -12    2.50    1.40
  10  -7 -12    4.70    1.70
 -10   7  13   43.50   10.10
 -10   7  13   26.30    6.50
  10  -7 -13   46.10    8.50
  10  -7 -13   51.90    3.00
 -10   7  14   11.60    8.20
 -10   7  14   11.70    4.10
  10  -7 -14    4.80    4.50
  10  -7 -14    5.70    1.30
  10  -7 -14    8.50    2.10
 -10   7  15   53.70    5.10
  10  -7 -15   79.00    3.70
  10  -7 -15   76.90    4.90
 -10   8   1   11.30    6.10
 -10   8   1    9.60    1.80
  10  -8  -1    8.10    4.00
  10  -8  -1   13.10    2.40
  10  -8  -1   13.70    1.40
  10  -8  -1    9.40    1.70
 -10   8   2  205.30   23.30
 -10   8   2  202.30    7.10
  10  -8  -2  203.80   23.00
  10  -8  -2  217.20   19.80
  10  -8  -2  215.50    6.40
  10  -8  -2  204.00    7.30
 -10   8   3  105.90    4.90
  10  -8  -3  121.00   11.20
  10  -8  -3  129.00    4.60
 -10   8   4  112.60   14.80
 -10   8   4  123.30    5.70
  10  -8  -4  107.40   13.90
  10  -8  -4   98.30    9.50
  10  -8  -4   99.90    3.90
 -10   8   5  216.30   24.00
 -10   8   5  190.60    7.90
  10  -8  -5  194.80   22.00
  10  -8  -5  168.60    5.30
  10  -8  -5  192.30    7.20
 -10   8   6   20.20    4.90
 -10   8   6   24.60    7.30
 -10   8   6   26.20    3.60
  10  -8  -6   29.00    7.10
  10  -8  -6   24.40    3.20
  10  -8  -6   24.90    2.00
  10  -8  -6   26.50    2.60
 -10   8   7  160.30   18.00
 -10   8   7  172.80   20.30
 -10   8   7  170.60   10.60
  10  -8  -7  174.50   20.40
  10  -8  -7  171.20   15.90
  10  -8  -7  153.10    5.30
  10  -8  -7  170.80    6.80
 -10   8   8   10.20    3.90
 -10   8   8   14.10    9.80
  10  -8  -8   10.50    2.40
  10  -8  -8   14.10    1.90
 -10   8   9   90.70   13.70
 -10   8   9   87.90   21.60
  10  -8  -9  103.20   13.80
  10  -8  -9  101.10    9.90
  10  -8  -9  116.70    5.10
 -10   8  10   36.30    8.70
 -10   8  10   38.10   21.60
  10  -8 -10   33.20    7.00
  10  -8 -10   35.10    4.50
  10  -8 -10   34.40    2.90
  10  -8 -10   31.90    3.00
 -10   8  11   53.50   10.90
 -10   8  11   50.70   17.50
  10  -8 -11   56.90    9.10
  10  -8 -11   61.10    6.50
  10  -8 -11   64.00    3.80
  10  -8 -11   63.50    4.20
 -10   8  12   96.30   14.90
 -10   8  12  106.60   18.30
  10  -8 -12   99.70   13.90
  10  -8 -12  106.80    4.70
  10  -8 -12   96.80    5.10
 -10   8  13   -2.80    5.50
 -10   8  13   -1.70    5.00
  10  -8 -13    1.50    3.60
  10  -8 -13    1.10    1.10
  10  -8 -13    0.60    1.50
 -10   8  14   42.70    6.20
  10  -8 -14   51.50    2.80
  10  -8 -14   56.70    4.20
  10  -8 -15   -1.10    1.40
 -10   9   1  199.00   22.90
 -10   9   1  212.30    7.50
  10  -9  -1  218.30   23.90
  10  -9  -1  205.20   19.00
  10  -9  -1  201.10    6.00
  10  -9  -1  201.10    7.30
 -10   9   2    7.80    5.70
 -10   9   2    8.80    1.70
  10  -9  -2   10.20    2.50
  10  -9  -2   10.00    1.30
  10  -9  -2    9.90    1.80
 -10   9   3  182.40   20.80
 -10   9   3  162.60    6.50
  10  -9  -3  171.80   20.00
  10  -9  -3  164.30   15.30
  10  -9  -3  170.80    5.60
  10  -9  -3  162.80    6.40
 -10   9   4   91.40   13.20
 -10   9   4   99.40    5.20
  10  -9  -4   95.20   13.10
  10  -9  -4  108.20    4.20
  10  -9  -4   93.70    4.60
 -10   9   5   67.50   11.20
 -10   9   5   79.90    5.00
  10  -9  -5   70.30   10.90
  10  -9  -5   76.10    7.30
  10  -9  -5   62.50    3.00
  10  -9  -5   76.70    4.30
 -10   9   6  119.60   15.50
 -10   9   6  126.10    7.40
  10  -9  -6  114.40   14.70
  10  -9  -6   99.00    9.50
  10  -9  -6   95.50    3.90
  10  -9  -6  105.30    5.00
 -10   9   7    3.50    5.60
 -10   9   7    8.90    3.70
  10  -9  -7    9.40    4.40
  10  -9  -7    8.80    2.40
  10  -9  -7    8.20    1.50
  10  -9  -7    9.50    1.90
 -10   9   8  108.40   14.20
 -10   9   8   96.40   15.50
  10  -9  -8   92.70   13.00
  10  -9  -8   99.90    9.60
  10  -9  -8  102.50    4.50
  10  -9  -8  102.90    5.10
 -10   9   9   12.50    6.30
 -10   9   9    3.10   14.10
  10  -9  -9   11.00    4.60
  10  -9  -9   13.20    2.80
  10  -9  -9   13.50    2.00
  10  -9  -9   16.10    2.30
 -10   9  10   59.20   11.30
 -10   9  10   73.00   25.00
  10  -9 -10   57.80    9.30
  10  -9 -10   68.60    7.10
  10  -9 -10   79.90    4.30
  10  -9 -10   67.00    4.10
 -10   9  11   34.40   18.90
  10  -9 -11   59.80    6.20
  10  -9 -11   53.20    3.50
  10  -9 -11   51.70    3.70
 -10   9  12   37.20    9.70
 -10   9  12   41.20   16.80
  10  -9 -12   39.80    7.80
  10  -9 -12   46.30    3.60
 -10   9  13  126.50   18.40
 -10   9  13  141.70   17.20
  10  -9 -13  144.70   17.90
  10  -9 -13  147.40    5.50
  10  -9 -13  133.40    6.20
 -10   9  14   -2.20    3.30
  10  -9 -14    0.40    1.00
  10  -9 -14   -0.10    1.50
 -10   9  15   31.20    5.30
  10  -9 -15   45.80    2.90
  10  -9 -15   41.80    4.00
  10  -9 -16    6.10    2.30
 -10  10   1    6.40    6.60
 -10  10   1   13.70    2.00
  10 -10  -1    9.70    2.80
  10 -10  -1   10.10    1.30
  10 -10  -1   13.10    2.00
 -10  10   2  179.50   22.20
  10 -10  -2  204.80   22.80
  10 -10  -2  210.50   19.20
  10 -10  -2  198.90    6.10
  10 -10  -2  197.40    7.20
 -10  10   3   49.70   10.30
  10 -10  -3   79.70   11.30
  10 -10  -3   75.30    3.50
  10 -10  -3   69.90    4.10
 -10  10   4   59.40   10.90
  10 -10  -4   57.70    9.20
  10 -10  -4   62.30    6.10
  10 -10  -4   71.10    4.10
 -10  10   5   72.30   12.00
  10 -10  -5   82.90   11.70
  10 -10  -5   75.00    7.30
  10 -10  -5   75.10    4.20
 -10  10   6   27.20    7.50
  10 -10  -6   33.60    7.50
  10 -10  -6   30.50    3.70
  10 -10  -6   30.10    2.80
 -10  10   7  135.80   17.50
  10 -10  -7  144.90   17.60
  10 -10  -7  146.20   13.50
  10 -10  -7  132.50    5.70
 -10  10   8    2.80    5.20
  10 -10  -8    1.10    3.50
  10 -10  -8   -0.80    1.20
 -10  10   9  140.40   18.30
 -10  10   9   95.10   23.80
  10 -10  -9  149.80   17.70
  10 -10  -9  144.50   13.40
  10 -10  -9  122.30    5.10
  10 -10  -9  139.30    6.10
 -10  10  10   33.30    9.30
 -10  10  10   51.50   25.60
  10 -10 -10   36.40    7.70
  10 -10 -10   46.60    4.90
  10 -10 -10   45.80    3.40
  10 -10 -10   49.50    3.70
 -10  10  11   71.70   12.50
  10 -10 -11   66.40   10.60
  10 -10 -11   77.60    7.60
  10 -10 -11   72.20    4.10
  10 -10 -11   79.60    4.60
 -10  10  12   87.90   14.30
 -10  10  12   80.20   18.20
  10 -10 -12   96.50   13.20
  10 -10 -12  102.70    4.80
 -10  10  13   23.40   11.00
  10 -10 -13   10.50    1.90
  10 -10 -13   14.00    2.50
 -10  10  14   70.80    8.90
  10 -10 -14   72.40    3.70
  10 -10 -14   76.10    4.80
 -10  10  15   -0.10    2.60
  10 -10 -15    0.10    1.30
  10 -10 -15   -0.90    1.40
 -10  11   1   95.60   14.30
 -10  11   1   85.40    4.60
  10 -11  -1   87.40   11.60
  10 -11  -1   93.30    9.30
  10 -11  -1  100.30    4.00
  10 -11  -1   88.20    4.60
 -10  11   2    1.10    5.90
 -10  11   2    0.90    1.20
  10 -11  -2   -0.90    2.90
  10 -11  -2    1.00    0.90
  10 -11  -2    0.70    1.20
 -10  11   3  125.60   17.20
 -10  11   3  151.90    6.80
  10 -11  -3  143.70   17.20
  10 -11  -3  144.10   13.60
  10 -11  -3  139.40    4.90
  10 -11  -3  140.30    5.90
 -10  11   4   41.40    9.60
 -10  11   4   55.80    4.40
  10 -11  -4   36.70    7.20
  10 -11  -4   49.90    5.40
  10 -11  -4   45.20    3.40
 -10  11   5   83.60    5.70
  10 -11  -5   80.20   11.70
  10 -11  -5   89.80    8.60
  10 -11  -5  101.20    4.10
 -10  11   6  116.10   16.20
 -10  11   6  120.10    7.80
  10 -11  -6  154.60   18.60
  10 -11  -6  138.10   13.00
  10 -11  -6  132.90    4.80
 -10  11   7   18.40    7.00
 -10  11   7   10.20    4.40
  10 -11  -7   16.40    5.10
  10 -11  -7   12.20    1.70
 -10  11   8   60.70   11.10
 -10  11   8   82.80   16.80
  10 -11  -8   62.50   10.00
  10 -11  -8   66.20    6.40
  10 -11  -8   66.70    3.60
  10 -11  -8   71.50    4.30
 -10  11   9   16.30    6.90
 -10  11   9   12.00   15.40
  10 -11  -9   11.90    4.50
  10 -11  -9   11.20    2.40
  10 -11  -9   14.90    2.00
  10 -11  -9   14.10    2.20
 -10  11  10  147.70   19.80
 -10  11  10  154.50   35.30
  10 -11 -10  164.10   19.70
  10 -11 -10  163.50   15.20
  10 -11 -10  164.10    6.30
  10 -11 -10  160.60    6.70
 -10  11  11   39.70    9.10
 -10  11  11   43.10   23.10
  10 -11 -11   42.20    8.00
  10 -11 -11   51.30    3.50
  10 -11 -11   47.40    3.70
 -10  11  12   52.60   10.70
 -10  11  12   52.30   18.40
  10 -11 -12   50.80    8.80
 -10  11  13   34.60   14.50
  10 -11 -13   41.50    3.70
 -10  11  14   10.50    5.20
  10 -11 -14   11.00    1.90
  10 -11 -14    9.00    2.20
 -10  11  15   34.00    5.40
  10 -11 -15   86.10    4.60
 -10  12   1    6.80    7.00
 -10  12   1    5.00    1.70
  10 -12  -1    5.70    3.50
  10 -12  -1    4.10    3.10
  10 -12  -1    5.60    1.20
  10 -12  -1    6.50    1.70
 -10  12   2   95.90   14.90
  10 -12  -2  111.60    5.20
 -10  12   3   11.90    2.40
  10 -12  -3   14.20    4.80
  10 -12  -3   10.60    2.80
  10 -12  -3   14.70    1.70
  10 -12  -3   14.30    2.10
 -10  12   4  136.20    7.10
  10 -12  -4  120.70   11.60
  10 -12  -4  112.10    4.20
  10 -12  -4  118.10    5.40
 -10  12   5   17.00    7.40
 -10  12   5   30.70    3.90
  10 -12  -5   23.90    5.80
  10 -12  -5   24.00    3.50
  10 -12  -5   22.50    2.00
  10 -12  -5   27.00    2.70
 -10  12   6   89.60   13.30
 -10  12   6   89.20    7.20
  10 -12  -6   98.10   12.80
  10 -12  -6   89.00    9.10
  10 -12  -6   96.00    4.10
  10 -12  -6  107.30    5.10
 -10  12   7   75.20   13.10
 -10  12   7  111.70   10.60
  10 -12  -7   99.00   13.10
  10 -12  -7   93.10    9.20
  10 -12  -7  102.10    4.40
  10 -12  -7  100.90    5.00
 -10  12   8   10.30    7.40
 -10  12   8   17.00   11.90
  10 -12  -8   13.00    5.00
  10 -12  -8   10.70    2.70
  10 -12  -8   10.00    1.70
  10 -12  -8   10.20    1.90
 -10  12   9   40.50    9.40
 -10  12   9   43.80   18.70
  10 -12  -9   60.90    9.70
  10 -12  -9   51.30    5.40
  10 -12  -9   48.60    3.30
  10 -12  -9   47.90    3.50
 -10  12  10    1.60    5.00
  10 -12 -10    1.40    2.90
  10 -12 -10    2.00    1.50
 -10  12  11  100.20   14.60
 -10  12  11   89.80   25.60
  10 -12 -11  100.20   13.60
  10 -12 -11  123.20    5.50
  10 -12 -11  109.00    5.40
 -10  12  12   41.50   17.30
  10 -12 -12   27.90    2.80
  10 -12 -12   26.30    3.40
 -10  12  13    2.90    7.40
  10 -12 -13    9.50    1.90
 -10  12  14    4.90    3.90
  10 -12 -14   35.60    3.30
 -10  13   1  147.00   20.40
 -10  13   1  160.60    7.10
  10 -13  -1  161.60   18.90
  10 -13  -1  151.30   15.00
  10 -13  -1  161.60    5.40
 -10  13   2    3.20    7.40
 -10  13   2    3.70    1.90
  10 -13  -2    9.50    4.50
  10 -13  -2    9.60    3.30
  10 -13  -2    8.20    1.30
 -10  13   3   84.70   14.90
 -10  13   3  115.00    6.50
  10 -13  -3  103.30   13.70
  10 -13  -3  109.90   10.60
  10 -13  -3  102.30    4.00
 -10  13   4    4.00    6.20
 -10  13   4    0.40    1.70
  10 -13  -4    0.30    2.90
  10 -13  -4    1.10    0.80
 -10  13   5   93.80   14.90
 -10  13   5  124.00    8.00
  10 -13  -5  109.10   14.10
  10 -13  -5  119.40   11.50
 -10  13   6   30.30    8.70
 -10  13   6   42.00    5.80
  10 -13  -6   37.70    7.20
  10 -13  -6   37.60    4.90
  10 -13  -6   39.80    2.50
 -10  13   7   27.30    7.10
  10 -13  -7   27.00    4.00
  10 -13  -7   30.50    2.40
 -10  13   8   83.10   14.20
 -10  13   8  104.20   18.40
  10 -13  -8  114.00   14.10
  10 -13  -8   97.00    9.70
  10 -13  -8  108.60    4.80
 -10  13   9   -0.30    5.50
 -10  13   9    4.30   12.70
  10 -13  -9    0.00    3.40
  10 -13  -9    1.40    1.30
 -10  13  10   68.70   11.60
 -10  13  10   73.80   22.60
  10 -13 -10   55.40    9.30
  10 -13 -10   72.50    4.10
 -10  13  11    1.30   15.30
  10 -13 -11    2.70    1.60
 -10  13  12   34.30   12.10
  10 -13 -12   40.70    3.50
  10 -14  -1   25.80    4.60
 -10  14   2   49.50   10.60
  10 -14  -2   62.80   10.00
  10 -14  -2   49.30    6.80
 -10  14   3    3.70    6.00
  10 -14  -3   -0.60    2.70
  10 -14  -3    2.30    3.20
 -10  14   4   64.60   12.10
 -10  14   4   94.00    7.00
  10 -14  -4   88.80   12.20
  10 -14  -4  100.40   10.00
  10 -14  -4   86.70    3.90
 -10  14   5    6.50    5.50
 -10  14   5    5.60    2.80
  10 -14  -5    7.80    1.40
 -10  14   6   30.80    5.60
  10 -14  -6   41.00    7.60
  10 -14  -6   42.60    5.60
  10 -14  -6   56.00    3.20
 -10  14   7   13.80    7.30
 -10  14   7   20.70    7.30
  10 -14  -7   23.60    5.90
  10 -14  -7   25.70    2.30
 -10  14   8    0.50    5.10
 -10  14   8    1.30    8.50
  10 -14  -8    5.60    3.50
  10 -14  -8    0.60    1.30
 -10  14   9   61.70   11.80
  10 -14  -9   83.10   12.70
 -10  15   1   38.50    9.40
  10 -15  -1   51.30    9.70
  10 -15  -1   50.40    7.60
 -10  15   2   15.90    7.50
  10 -15  -2   10.10    4.50
  10 -15  -2   12.50    4.00
 -10  15   3   32.00    8.80
  10 -15  -3   43.50    8.40
  10 -15  -3   49.60    6.60
 -10  15   4    2.00    5.00
  10 -15  -4   -0.20    2.90
  10 -15  -4    2.30    3.20
 -10  15   5   45.30    9.60
  10 -15  -5   83.30   11.00
 -10  15   6   23.00    7.30
  10 -15  -6   42.60    7.80
 -10  15   7   11.90    6.20
  10 -15  -7   15.10    5.50
 -10  16   4   32.20    7.80
 -10  16   5    2.40    4.10
  10 -16  -5    0.00    3.50
   9  18  -1   76.30   10.10
   9  17  -1    1.50    2.40
   9  17  -2  101.00   11.00
  -9 -16   1  151.50   18.90
   9  16  -1  171.50   17.30
  -9 -16   2    0.60    3.30
   9  16  -2   -0.30    2.70
   9  16  -3  159.30   16.80
   9  16  -4   19.60    4.90
  -9 -15   1   77.80   11.50
   9  15  -1   67.70    8.50
  -9 -15   2  175.60   21.20
   9  15  -2  183.90   18.80
  -9 -15   3    9.40    4.60
   9  15  -3    3.30    3.50
  -9 -15   4   94.60   13.60
   9  15  -4  103.30   11.80
   9  15  -5   23.10    5.20
  -9 -14   1  148.10   18.00
   9  14  -1  141.10   15.20
   9  14  -1  149.60   19.80
  -9 -14   2   24.50    7.50
   9  14  -2   31.00    5.60
  -9 -14   3   87.50   13.00
   9  14  -3  107.50   11.90
  -9 -14   4    4.90    4.00
   9  14  -4    3.20    3.30
  -9 -14   5   74.80   11.40
   9  14  -5   63.90    8.80
   9  14  -6   77.20   10.00
   9  14  -7    9.40    4.10
   9  13  -1   67.90    8.70
   9  13  -1   55.80   11.60
  -9 -13   2  144.80   18.40
   9  13  -2  179.70   21.70
  -9 -13   3    1.00    3.10
   9  13  -3    0.30    2.20
  -9 -13   4   97.00   13.80
   9  13  -4   95.60   11.40
  -9 -13   5    8.80    4.50
   9  13  -5    9.20    4.50
  -9 -13   6  119.30   15.60
   9  13  -7   93.40   11.80
   9  13  -8   10.30    4.40
  -9 -12   1  224.80   25.20
   9  12  -1  220.80   22.70
   9  12  -1  234.60   26.60
  -9 -12   2   28.60    6.60
   9  12  -3   88.60   10.80
   9  12  -3   92.00   13.60
  -9 -12   4    5.30    3.90
   9  12  -4    6.40    3.40
   9  12  -4   11.00    6.30
   9  12  -5  135.00   15.30
  -9 -12   6   25.80    6.60
   9  12  -6   29.70    6.30
  -9 -12   7  112.80   15.10
   9  12  -7  126.60   14.80
   9  12  -8   98.40   12.40
   9  12  -9   35.50    6.70
  -9 -11   1  236.70   26.00
   9  11  -1  226.30   23.50
   9  11  -1  229.70   26.10
  -9 -11   2  155.90   19.30
   9  11  -2  174.20   18.20
  -9 -11   3   29.90    6.80
   9  11  -3   34.50    6.20
   9  11  -3   23.10    7.50
  -9 -11   4  207.40   24.10
   9  11  -4  215.80   22.80
   9  11  -4  218.00   24.90
  -9 -11   5    6.10    3.80
   9  11  -5    9.50    6.60
  -9 -11   6  196.20   22.90
   9  11  -6  160.50   18.30
  -9 -11   7   17.10    5.60
   9  11  -7   12.70    5.00
  -9 -11   8   90.30   12.70
   9  11  -8   91.70   12.40
   9  11  -9   67.90   10.00
   9  11 -10    1.40    3.80
  -9 -10   1   52.00    8.60
   9  10  -1   51.90    9.70
  -9 -10   2  114.40   14.70
   9  10  -2  128.30   14.40
   9  10  -2  111.90   14.90
   9  10  -3  104.00   12.80
  -9 -10   4   23.60    6.10
   9  10  -4   21.40    5.20
   9  10  -4   18.00    6.80
  -9 -10   5  242.70   27.20
   9  10  -5  240.90   25.90
   9  10  -5  255.70   28.50
  -9 -10   6   13.40    5.00
   9  10  -6   20.50    7.20
  -9 -10   7  159.00   19.80
   9  10  -7  166.60   19.00
  -9 -10   8   18.00    5.60
   9  10  -8   19.20    6.10
  -9 -10   9   65.40   10.20
   9  10  -9   73.90   11.50
   9  10 -11    6.10    4.90
  -9  -9   1  229.70   25.60
   9   9  -1  240.20   25.30
   9   9  -1  232.50   25.40
  -9  -9   2  152.70   18.30
   9   9  -2  144.10   17.30
  -9  -9   3   50.70    8.60
   9   9  -3   60.40    9.10
   9   9  -3   57.30    9.40
   9   9  -4  242.50   26.10
  -9  -9   5    0.50    2.70
   9   9  -5    1.40    2.80
   9   9  -5    0.20    4.70
  -9  -9   6  191.50   22.30
   9   9  -6  189.60   21.50
   9   9  -6  187.90   22.40
  -9  -9   7   40.90    8.10
   9   9  -7   33.90    8.00
   9   9  -8   79.70   11.50
  -9  -9   9   46.10    8.40
   9   9  -9   58.50   10.30
  -9  -9  10   44.30    7.90
   9   9 -11  132.50   16.80
   9   8  -1   36.40    6.50
  -9  -8   2  152.90   18.40
   9   8  -2  174.30   19.30
   9   8  -2  161.40   18.60
  -9  -8   3  168.00   19.60
   9   8  -3  161.40   18.70
   9   8  -3  162.10   18.80
  -9  -8   4   50.10    8.50
   9   8  -4   56.00    8.60
   9   8  -4   51.40    9.00
   9   8  -5  274.90   30.60
  -9  -8   6   -0.30    2.90
   9   8  -6    2.60    3.70
   9   8  -6   -5.10    4.30
  -9  -8   7  172.70   20.40
   9   8  -7  181.70   20.70
   9   8  -7  171.20   20.40
  -9  -8   8   23.70    5.70
   9   8  -8   27.60    6.70
   9   8  -8   29.80    7.90
   9   8  -9   56.20   10.10
  -9  -8  10   58.40    9.40
   9   8 -10   52.30    9.70
  -9  -8  11   39.60    7.00
   9   8 -11   36.80    8.20
   9   8 -12  111.80   15.20
   9   7  -1  217.10   23.40
  -9  -7   2  119.40   15.30
   9   7  -2  135.40   15.70
  -9  -7   3  208.10   23.20
   9   7  -3  211.00   23.20
   9   7  -3  214.00   23.30
  -9  -7   4  374.50   39.00
   9   7  -4  391.00   40.30
   9   7  -4  363.10   37.80
  -9  -7   5   28.00    6.30
   9   7  -5   24.50    5.80
   9   7  -5   24.30    6.50
   9   7  -6  150.20   17.90
  -9  -7   7    6.00    3.80
   9   7  -7    7.10    4.30
   9   7  -7    9.00    5.50
  -9  -7   8  183.60   20.90
   9   7  -8  186.50   21.20
   9   7  -8  161.60   20.20
  -9  -7   9   15.80    5.40
   9   7  -9   12.80    5.00
  -9  -7  10   69.10   10.00
   9   7 -10   72.30   11.40
  -9  -7  11   63.90    9.40
   9   7 -11   72.00   11.60
   9   7 -12   42.50    9.00
   9   7 -13  127.10   16.80
  -9  -6   1   12.20    0.90
  -9  -6   1   15.50    2.80
   9   6  -1   16.60    4.70
  -9  -6   2  373.60   37.40
   9   6  -2  346.10   36.00
  -9  -6   3  103.00   13.50
  -9  -6   3  114.60   13.80
   9   6  -3   90.60   11.80
   9   6  -3  110.50   13.60
  -9  -6   4  151.20   18.00
  -9  -6   4  140.00   16.50
   9   6  -4  167.70   19.00
   9   6  -4  155.80   18.00
  -9  -6   5  350.90   36.80
   9   6  -5  365.90   37.10
  -9  -6   6   23.90    5.70
  -9  -6   6   18.40    6.10
   9   6  -6   19.20    5.30
   9   6  -6   17.70    5.60
  -9  -6   7  127.60   15.70
  -9  -6   7  124.00   15.80
   9   6  -7  125.80   15.80
   9   6  -7  128.80   16.20
  -9  -6   8   14.70    4.90
  -9  -6   8    9.70    6.00
   9   6  -8    8.20    4.00
   9   6  -8    8.40    5.30
  -9  -6   9  173.80   19.70
   9   6  -9  160.90   20.50
   9   6  -9  161.10   19.00
  -9  -6  10   49.00    8.00
   9   6 -10   55.20    9.60
  -9  -6  11   35.20    6.70
   9   6 -11   41.70    8.70
  -9  -6  12   68.70    9.50
   9   6 -13   22.20    6.80
  -9  -5   1  595.30   59.60
  -9  -5   1  588.30   58.50
  -9  -5   1  635.60   13.80
   9   5  -1  610.70   60.20
   9   5  -1  645.10   61.80
  -9  -5   2   21.40    5.60
  -9  -5   2   23.20    1.70
   9   5  -2   21.60    5.10
   9   5  -2   24.60    0.90
  -9  -5   3  127.30   15.40
   9   5  -3  126.10   15.20
  -9  -5   4   97.50   12.60
  -9  -5   4   97.20   12.70
   9   5  -4   89.20   11.90
   9   5  -4  110.30   13.40
  -9  -5   5   98.10   12.80
  -9  -5   5  110.50   14.10
   9   5  -5  108.50   13.60
   9   5  -5  114.10   13.90
  -9  -5   6  103.60   12.90
  -9  -5   6   79.10   12.20
   9   5  -6   81.30   11.50
   9   5  -6   76.80   10.60
  -9  -5   7    5.20    3.70
  -9  -5   7    5.60    5.70
   9   5  -7    6.80    4.00
   9   5  -7    4.30    4.40
  -9  -5   8  104.90   13.00
  -9  -5   8  110.80   15.10
   9   5  -8  105.20   13.90
   9   5  -8  126.00   15.40
  -9  -5   9    8.70    3.80
  -9  -5   9   12.70    6.50
   9   5  -9    9.60    4.50
   9   5  -9    7.10    4.90
  -9  -5  10  121.50   14.60
  -9  -5  10  120.80   16.40
   9   5 -10  111.00   14.60
   9   5 -10  118.80   14.90
  -9  -5  11  146.50   17.00
  -9  -5  11  149.20   19.70
   9   5 -11  134.50   17.30
  -9  -5  12   11.80    4.00
  -9  -5  12   12.50    6.90
   9   5 -12   17.70    6.60
  -9  -5  13  103.90   13.00
  -9  -5  13  104.70   16.90
   9   5 -13  108.10   15.30
   9   5 -14    3.00    4.10
  -9  -4   1    6.60    3.20
  -9  -4   1   10.20    4.20
  -9  -4   1   10.60    1.10
   9   4  -1    3.70    2.20
   9   4  -1    6.30    3.90
   9   4  -1    7.00    0.80
  -9  -4   2  284.30   29.90
  -9  -4   2  292.90   30.10
  -9  -4   2  287.60    6.70
   9   4  -2  310.50   31.40
  -9  -4   3   84.30   11.10
  -9  -4   3   84.50    2.50
   9   4  -3   79.40   10.70
  -9  -4   4  145.20   16.90
   9   4  -4  143.20   16.80
  -9  -4   5  127.00   15.00
  -9  -4   5  126.60   15.30
   9   4  -5  102.80   13.40
   9   4  -5  122.10   14.40
  -9  -4   6   87.30   11.60
  -9  -4   6   79.60   12.90
   9   4  -6   97.30   13.00
   9   4  -6   89.50   11.70
  -9  -4   7  197.80   22.00
  -9  -4   7  232.50   25.50
   9   4  -7  215.00   23.90
   9   4  -7  244.40   25.40
  -9  -4   8    1.80    2.80
  -9  -4   8    2.90    5.30
   9   4  -9  157.90   18.80
   9   4  -9  175.20   19.30
  -9  -4  10   70.30    9.70
   9   4 -10   57.10    9.70
   9   4 -10   65.30    9.70
  -9  -4  11  117.70   14.10
  -9  -4  11  126.70   17.40
   9   4 -11   98.80   13.30
  -9  -4  12   71.50    9.80
  -9  -4  12   63.20   12.10
   9   4 -12   76.60   12.20
  -9  -4  14  120.50   18.10
   9   4 -14  130.00   17.20
  -9  -3   1  360.10   36.30
  -9  -3   1  357.30    8.60
   9   3  -1  353.60   35.30
   9   3  -1  364.30    8.80
  -9  -3   2   11.20    3.40
  -9  -3   2   17.30    5.20
  -9  -3   2   18.00    1.30
   9   3  -2   17.80    4.40
   9   3  -2   11.50    3.90
   9   3  -2   18.40    1.10
   9   3  -2   17.90    1.30
  -9  -3   3  513.80   50.30
  -9  -3   3  496.70   11.40
   9   3  -3  475.40   48.60
   9   3  -3  517.80   11.20
   9   3  -3  491.40   10.80
  -9  -3   4  226.50   23.80
   9   3  -4  209.20   22.90
   9   3  -4  207.30    5.00
   9   3  -4  203.80    4.80
  -9  -3   5  119.60   14.80
  -9  -3   5  139.50   16.20
   9   3  -5  118.40   14.60
  -9  -3   6  143.80   16.10
  -9  -3   6  134.70   16.20
   9   3  -6  120.40   15.10
   9   3  -6  127.10   14.90
  -9  -3   7  120.40   14.20
  -9  -3   7  123.70   15.60
   9   3  -7  119.80   15.00
   9   3  -7  115.30   13.80
  -9  -3   8  465.40   45.50
  -9  -3   8  412.90   42.50
   9   3  -8  383.60   40.40
   9   3  -8  375.40   39.30
  -9  -3   9    6.70    3.40
  -9  -3   9    8.00    5.20
   9   3  -9    7.30    3.90
   9   3  -9    9.40    4.60
  -9  -3  10  179.70   19.70
  -9  -3  10  165.30   20.70
   9   3 -10  165.10   19.70
   9   3 -10  177.40   19.40
  -9  -3  11   46.80    7.50
  -9  -3  11   51.90   10.70
   9   3 -11   45.10    8.30
  -9  -3  12  111.50   13.30
  -9  -3  12  110.50   16.10
   9   3 -12  105.10   14.20
  -9  -3  13   59.40    8.20
  -9  -3  13   57.30   11.70
   9   3 -13   43.80    8.80
  -9  -3  14    8.50    7.40
   9   3 -14    5.00    5.00
  -9  -3  15   21.10    8.00
   9   3 -15   44.40    9.60
  -9  -2   1    2.50    2.80
  -9  -2   1    2.10    2.90
  -9  -2   1    1.80    0.80
   9   2  -1    3.50    2.90
   9   2  -1    3.00    3.20
   9   2  -1    2.60    0.80
  -9  -2   2  434.80   43.50
  -9  -2   2  444.80   44.10
  -9  -2   2  455.40   10.70
   9   2  -2  421.00   43.30
   9   2  -2  450.10   43.80
   9   2  -2  456.80   10.20
   9   2  -2  444.00   10.50
  -9  -2   3    2.10    2.30
  -9  -2   3    3.20    4.10
  -9  -2   3    1.40    0.90
   9   2  -3    2.50    2.80
   9   2  -3    6.90    4.20
   9   2  -3    2.20    0.70
   9   2  -3    3.00    0.80
  -9  -2   4  523.20   51.40
  -9  -2   4  554.10   15.60
   9   2  -4  497.70   50.20
   9   2  -4  485.50   10.30
   9   2  -4  513.80   11.70
  -9  -2   5  162.70   18.50
  -9  -2   5  141.90   10.20
   9   2  -5  158.20   18.30
   9   2  -5  166.70    4.50
  -9  -2   6   98.20   12.30
  -9  -2   6  108.30   13.70
  -9  -2   6  105.80    3.90
   9   2  -6   98.50   12.80
   9   2  -6  106.00   12.50
   9   2  -6  102.30    2.70
   9   2  -6  105.30    3.00
  -9  -2   7  232.40   24.40
   9   2  -7  221.60   23.30
  -9  -2   8   67.60    9.30
  -9  -2   8   49.00    9.20
   9   2  -8   45.30    7.80
   9   2  -8   61.20    8.70
  -9  -2   9  293.20   30.20
  -9  -2   9  303.70   32.10
   9   2  -9  272.10   29.80
   9   2  -9  292.10   29.80
  -9  -2  10   43.70    7.10
  -9  -2  10   42.20    9.10
   9   2 -10   34.30    6.90
   9   2 -10   33.90    6.50
  -9  -2  11  101.60   12.40
  -9  -2  11   98.70   16.40
   9   2 -11  100.40   12.10
  -9  -2  12   53.40   10.80
   9   2 -12   45.00    8.20
  -9  -2  13   76.10    9.70
  -9  -2  13   72.80   12.60
   9   2 -13   68.80   10.70
  -9  -2  14   82.80   10.20
  -9  -2  14   68.80   12.90
   9   2 -14   91.20   12.90
  -9  -2  15    0.10    5.40
   9   2 -15   -1.50    4.20
  -9  -1   1  313.60   31.80
  -9  -1   1  337.70   33.30
  -9  -1   1  305.30    7.80
   9   1  -1  341.20   34.40
   9   1  -1  341.60   33.00
   9   1  -1  335.70    8.80
  -9  -1   2   71.30    9.00
   9   1  -2   80.30    9.60
   9   1  -2   79.60    3.20
  -9  -1   3  489.20   47.60
  -9  -1   3  484.90   47.70
  -9  -1   3  471.80   11.10
   9   1  -3  533.00   51.40
   9   1  -3  481.50   46.70
   9   1  -3  461.50   10.00
   9   1  -3  491.10   11.70
  -9  -1   4    1.60    3.40
  -9  -1   4    3.00    1.20
   9   1  -4    8.30    3.90
   9   1  -4    6.20    0.90
   9   1  -4    5.10    1.00
  -9  -1   5  459.20   45.80
  -9  -1   5  435.50   19.50
   9   1  -5  461.50   46.50
   9   1  -5  453.00   10.30
   9   1  -5  455.00   10.80
  -9  -1   6  141.50   16.80
  -9  -1   6  140.40   10.60
   9   1  -6  149.70   17.60
   9   1  -6  150.20    4.40
   9   1  -6  139.10    4.20
  -9  -1   7   66.10    8.90
  -9  -1   7   75.00   11.10
  -9  -1   7   77.80    4.20
   9   1  -7   62.80    9.60
   9   1  -7   71.10    9.20
   9   1  -7   62.50    2.10
   9   1  -7   75.20    2.90
  -9  -1   8  151.60   17.20
  -9  -1   8  170.50   19.80
  -9  -1   8  160.20    4.90
   9   1  -8  165.60   19.30
   9   1  -8  169.60   18.00
   9   1  -8  168.10    4.30
   9   1  -8  150.80    4.50
  -9  -1   9   11.10    3.80
  -9  -1   9   12.00    5.80
   9   1  -9    9.70    4.10
   9   1  -9   10.60    4.60
   9   1  -9   12.40    1.00
   9   1  -9   11.30    1.10
  -9  -1  10  165.70   18.50
  -9  -1  10  165.30   20.50
   9   1 -10  181.60    4.50
   9   1 -11   35.10    6.20
  -9  -1  12   92.60   11.30
  -9  -1  12   78.00   13.20
   9   1 -12   80.40   11.50
  -9  -1  13   55.30    7.60
  -9  -1  13   45.50   10.10
   9   1 -13   56.20    9.30
  -9  -1  14   28.80    5.60
  -9  -1  14   31.90    9.00
   9   1 -14   20.90    6.80
  -9  -1  15   74.10   13.60
   9   1 -15   88.30   12.90
  -9   0   1  148.90   16.40
  -9   0   1  167.20   18.00
  -9   0   1  172.60    5.40
   9   0  -1  158.20   18.30
   9   0  -1  184.60   18.20
   9   0  -1  182.30    5.90
  -9   0   2  358.20   35.70
  -9   0   2  367.10    9.30
   9   0  -2  377.70   36.30
   9   0  -2  382.70    9.10
   9   0  -2  352.80    9.00
  -9   0   3   15.50    3.60
  -9   0   3   21.40    5.10
  -9   0   3   22.90    1.70
   9   0  -3   25.00    5.40
   9   0  -3   24.40    4.70
   9   0  -3   20.60    1.30
   9   0  -3   21.30    1.70
  -9   0   4  363.90   36.80
   9   0  -4  369.40   37.90
   9   0  -4  370.20    8.70
   9   0  -4  352.90    9.00
  -9   0   5    4.80    2.50
  -9   0   5    5.10    4.40
   9   0  -5    7.90    3.90
   9   0  -5    3.10    2.80
   9   0  -5    5.00    1.00
  -9   0   6  223.40   23.90
   9   0  -6  196.80   22.80
   9   0  -6  207.20    5.80
   9   0  -6  216.90    6.30
  -9   0   7  172.60   19.60
   9   0  -7  161.50   19.20
   9   0  -7  166.80    4.90
   9   0  -7  163.20    5.00
  -9   0   8   25.70    5.10
  -9   0   8   23.10    6.80
  -9   0   8   17.70    2.70
   9   0  -8   23.40    5.80
   9   0  -8   28.60    5.30
   9   0  -8   27.60    1.50
   9   0  -8   28.80    1.90
  -9   0   9  261.00   28.10
  -9   0   9  245.00    7.60
   9   0  -9  232.80   26.40
   9   0  -9  241.10    6.00
   9   0  -9  248.80    6.90
  -9   0  10   11.80    3.80
  -9   0  10    5.50    5.20
  -9   0  10    9.20    1.50
   9   0 -10   15.50    5.10
   9   0 -10   15.40    4.60
   9   0 -10   13.60    1.30
   9   0 -10   13.90    1.50
  -9   0  11  148.00   16.10
  -9   0  11  144.30   18.50
   9   0 -11  122.50   15.90
   9   0 -11  140.50   15.10
   9   0 -11  137.50    4.00
   9   0 -11  142.50    4.50
  -9   0  12    5.20    2.70
  -9   0  12   10.90    6.60
   9   0 -12    4.10    3.70
   9   0 -12    4.90    1.00
   9   0 -12    4.90    1.20
  -9   0  13   97.70   11.60
  -9   0  13  101.50   15.30
   9   0 -13   98.40   13.40
  -9   0  14   54.40    7.80
  -9   0  15   23.00    8.10
   9   0 -15   26.80    7.00
  -9   1   1  198.00   20.30
  -9   1   1  186.60   20.10
  -9   1   1  195.80    5.90
   9  -1  -1  204.10   22.20
   9  -1  -1  215.90   20.80
   9  -1  -1  208.90    6.50
  -9   1   2  149.90   16.30
  -9   1   2  168.60    5.40
   9  -1  -2  180.10   17.60
   9  -1  -2  158.20    4.40
   9  -1  -2  169.40    5.60
  -9   1   3  288.00   29.20
  -9   1   3  299.90   30.40
  -9   1   3  324.60    8.90
   9  -1  -3  278.00   30.20
   9  -1  -3  288.80   28.50
  -9   1   4    2.30    3.20
  -9   1   4    3.00    1.10
   9  -1  -4    3.30    2.90
   9  -1  -4    2.50    0.70
   9  -1  -4    3.20    1.00
  -9   1   5  235.00   24.40
  -9   1   5  242.60   25.80
  -9   1   5  263.50    9.30
   9  -1  -5  246.30   26.80
   9  -1  -5  261.00   25.40
   9  -1  -5  237.30    6.00
   9  -1  -5  253.60    7.30
  -9   1   6   94.40   12.60
  -9   1   6   89.30   10.80
   9  -1  -6  107.10   13.70
   9  -1  -6  105.10   11.70
   9  -1  -6  104.80    3.70
   9  -1  -6  100.30    3.90
  -9   1   7  119.00   14.40
  -9   1   7  130.70   15.70
   9  -1  -7   86.40   12.20
   9  -1  -7   88.90    3.50
   9  -1  -7  103.70    4.00
  -9   1   8  253.20   25.80
  -9   1   8  243.80   26.50
  -9   1   8  290.00   15.70
   9  -1  -8  253.50   27.60
   9  -1  -8  233.50   25.00
   9  -1  -8  235.50    6.30
   9  -1  -8  245.70    7.00
  -9   1   9   16.90    6.20
  -9   1   9   17.40    3.10
   9  -1  -9   17.70    5.10
   9  -1  -9   24.20    1.60
   9  -1  -9   23.80    1.90
  -9   1  10  187.50   20.10
  -9   1  10  182.70   21.80
  -9   1  10  210.40    7.90
   9  -1 -10  191.20   22.20
   9  -1 -10  185.50   19.30
   9  -1 -10  198.30    5.50
   9  -1 -10  197.80    6.10
  -9   1  11    5.70    2.80
  -9   1  11    7.70    5.30
   9  -1 -11    9.10    4.00
   9  -1 -11    6.60    3.30
   9  -1 -11    8.30    1.20
   9  -1 -11    7.60    1.40
  -9   1  12  197.30   20.80
  -9   1  12  206.30   23.90
   9  -1 -12  172.30   21.10
   9  -1 -12  189.20    6.00
  -9   1  13   48.50    7.30
  -9   1  13   42.00    9.80
   9  -1 -13   50.10    9.00
   9  -1 -13   47.20    2.80
  -9   1  14   85.10   10.80
  -9   1  14   75.60   15.30
   9  -1 -14  108.80   14.20
  -9   1  15   63.90   12.10
   9  -1 -15   83.30   12.20
   9  -1 -16    7.90    4.80
  -9   2   1   52.90    6.60
  -9   2   1   73.10    9.30
  -9   2   1   70.30    3.30
   9  -2  -1   48.40    7.60
   9  -2  -1   65.50    7.60
  -9   2   2  275.70   27.10
  -9   2   2  292.50    8.30
   9  -2  -2  258.70   25.40
   9  -2  -2  265.90    6.80
   9  -2  -2  255.60    7.40
  -9   2   3   27.10    4.30
  -9   2   3   36.30    6.60
  -9   2   3   35.90    2.30
   9  -2  -3   27.50    5.60
   9  -2  -3   38.00    5.30
  -9   2   4  345.40   34.70
  -9   2   4  343.90    9.60
   9  -2  -4  350.70   35.80
   9  -2  -4  327.80    8.00
   9  -2  -4  317.60    8.60
  -9   2   5   35.10    5.40
  -9   2   5   27.50    6.30
  -9   2   5   35.30    3.10
   9  -2  -5   41.70    7.50
   9  -2  -5   31.70    5.00
   9  -2  -5   31.70    1.80
   9  -2  -5   36.60    2.40
  -9   2   6  149.20   16.00
  -9   2   6  149.80   17.40
  -9   2   6  142.20    9.30
   9  -2  -6  154.80   18.20
   9  -2  -6  161.50   16.40
   9  -2  -6  150.80    4.60
   9  -2  -6  160.00    5.50
  -9   2   7   82.40   11.20
  -9   2   7   67.80   14.20
   9  -2  -7   69.90   10.30
   9  -2  -7   75.40    3.30
   9  -2  -7   72.10    3.40
  -9   2   8  143.10   17.30
  -9   2   8  136.10   15.20
   9  -2  -8  137.40   17.10
   9  -2  -8  157.60    5.30
   9  -2  -8  152.20    5.50
  -9   2   9  243.30   27.10
  -9   2   9  287.30   15.00
   9  -2  -9  259.80   28.50
   9  -2  -9  256.50    7.00
  -9   2  10   21.50    4.70
  -9   2  10   16.30    6.30
  -9   2  10   21.10    3.60
   9  -2 -10   19.60    5.50
   9  -2 -10   22.50    4.40
   9  -2 -10   24.70    1.80
  -9   2  11  194.80   21.20
  -9   2  11  232.60   25.70
  -9   2  11  205.80    8.00
   9  -2 -11  213.60   24.30
   9  -2 -11  215.10   21.40
   9  -2 -11  213.10    6.00
   9  -2 -11  212.80    7.40
  -9   2  12    1.40    2.40
  -9   2  12   -3.10    4.70
  -9   2  12    1.80    1.50
   9  -2 -12    1.80    1.00
   9  -2 -12    1.20    1.50
  -9   2  13  126.90   17.40
  -9   2  13  104.90    5.00
   9  -2 -13  109.60   14.80
   9  -2 -13  125.60    4.50
  -9   2  14   33.00    6.10
  -9   2  14   25.30    8.70
   9  -2 -14   34.10    7.50
   9  -2 -14   34.00    2.50
  -9   2  15   31.50    9.10
   9  -2 -15   31.50    7.30
   9  -2 -15   29.70    2.70
  -9   2  16   62.50   12.50
   9  -2 -16   62.40   10.60
  -9   3   1  182.00   18.50
  -9   3   1  174.80   18.90
  -9   3   1  173.90    5.80
   9  -3  -1  175.60   19.60
   9  -3  -1  182.10   17.30
   9  -3  -1  187.30    5.40
   9  -3  -1  166.90    5.70
  -9   3   2  109.80   12.00
  -9   3   2  117.90    4.60
   9  -3  -2  108.10   10.90
   9  -3  -2   96.60    3.30
   9  -3  -2  100.80    4.10
  -9   3   3  275.80   27.20
  -9   3   3  273.30   28.40
  -9   3   3  274.90    8.10
   9  -3  -3  271.80   28.60
   9  -3  -3  278.90   26.30
   9  -3  -3  257.40    6.70
   9  -3  -3  247.80    7.30
  -9   3   4   13.00    5.30
  -9   3   4   15.00    1.90
   9  -3  -4   11.00    4.30
   9  -3  -4    8.00    1.10
   9  -3  -4   12.90    1.60
  -9   3   5  341.50   34.40
  -9   3   5  364.70   37.00
  -9   3   5  385.00   11.60
   9  -3  -5  361.60   37.40
   9  -3  -5  344.50   33.60
  -9   3   6    9.60    3.10
  -9   3   6    7.40    4.50
  -9   3   6    7.90    2.50
   9  -3  -6    8.00    3.70
   9  -3  -6   12.90    3.50
   9  -3  -6    8.80    1.20
   9  -3  -6    7.80    1.40
  -9   3   7  272.30   27.60
  -9   3   7  251.00   28.00
  -9   3   7  246.50   18.90
   9  -3  -7  268.70   29.40
   9  -3  -7  287.70   27.40
   9  -3  -7  291.40    8.20
   9  -3  -7  275.80    8.10
  -9   3   8   74.70   11.00
  -9   3   8   72.20   15.40
   9  -3  -8   88.20   12.20
   9  -3  -8   91.90    4.00
   9  -3  -8   86.40    3.90
  -9   3   9  124.30   15.90
  -9   3   9  143.60   14.60
   9  -3  -9  137.90   17.00
   9  -3  -9  131.80    4.80
   9  -3  -9  133.00    5.10
  -9   3  10  149.10   16.50
  -9   3  10  140.00   17.80
  -9   3  10  156.70   10.50
   9  -3 -10  145.30   17.80
   9  -3 -10  158.40   15.70
   9  -3 -10  147.30    4.90
   9  -3 -10  142.70    5.30
  -9   3  11   24.10    5.10
  -9   3  11   22.20    7.10
  -9   3  11   22.40    3.70
   9  -3 -11   23.70    6.00
   9  -3 -11   23.00    4.20
   9  -3 -11   22.10    1.80
   9  -3 -11   22.30    2.20
  -9   3  12  173.90   18.90
  -9   3  12  166.30   20.50
  -9   3  12  165.10    7.40
   9  -3 -12  157.40   19.40
   9  -3 -12  169.20    5.30
   9  -3 -12  164.40    6.00
  -9   3  13   28.60    5.80
  -9   3  13   15.40    6.50
  -9   3  13   19.30    2.70
   9  -3 -13   27.10    6.60
   9  -3 -13   27.10    2.10
   9  -3 -13   29.20    2.70
  -9   3  14   38.60    6.50
  -9   3  14   32.90    9.70
  -9   3  14   35.00    3.30
   9  -3 -14   40.50    8.20
   9  -3 -14   43.20    2.60
   9  -3 -14   46.00    3.30
  -9   3  15   50.90   11.00
   9  -3 -15   37.60    7.80
   9  -3 -15   48.20    3.00
   9  -3 -15   51.90    3.70
  -9   3  16   23.80    8.50
   9  -3 -16   22.00    6.20
  -9   4   1  244.70   24.70
  -9   4   1  272.10   27.20
  -9   4   1  250.00    7.60
   9  -4  -1  252.80   26.80
   9  -4  -1  250.30   23.50
  -9   4   2  262.30   26.10
  -9   4   2  237.80   25.30
  -9   4   2  251.70    7.60
   9  -4  -2  260.10   27.40
   9  -4  -2  256.50   24.10
   9  -4  -2  264.20    7.10
   9  -4  -2  243.90    7.50
  -9   4   3   94.40   11.10
  -9   4   3  103.10   12.50
   9  -4  -3  112.60   13.90
   9  -4  -3  100.10   10.00
   9  -4  -3  100.60    4.30
   9  -4  -4  291.10   30.20
   9  -4  -4  265.80   25.50
   9  -4  -4  266.20    7.90
  -9   4   5    4.80    2.80
  -9   4   5    5.50    4.10
  -9   4   5    6.40    1.70
   9  -4  -5    7.40    3.90
   9  -4  -5    6.30    2.80
   9  -4  -5    6.10    1.10
   9  -4  -5    4.80    1.20
  -9   4   6  279.10   28.00
  -9   4   6  263.00   28.20
   9  -4  -6  267.20   29.00
   9  -4  -6  284.10   26.70
   9  -4  -6  267.10    7.00
   9  -4  -6  268.60    8.00
  -9   4   7   11.30    3.60
  -9   4   7   13.00    6.30
   9  -4  -7    8.70    2.90
   9  -4  -7    9.00    1.40
   9  -4  -7   11.30    1.70
  -9   4   8  229.20   24.10
  -9   4   8  215.50   24.40
   9  -4  -8  217.00   24.90
   9  -4  -8  231.00   22.30
   9  -4  -8  237.80    7.40
   9  -4  -8  232.60    7.40
  -9   4   9  109.20   14.70
   9  -4  -9  130.60   16.10
   9  -4  -9  123.30    5.00
  -9   4  10   91.90   13.20
   9  -4 -10  103.00   13.60
   9  -4 -10  100.20    4.50
  -9   4  11  175.50   18.50
  -9   4  11  141.00   19.00
   9  -4 -11  149.50   18.30
   9  -4 -11  157.10   15.50
   9  -4 -11  152.40    5.90
  -9   4  12    3.50    3.00
  -9   4  12    3.20    5.10
  -9   4  12    0.80    2.20
   9  -4 -12    4.80    3.70
   9  -4 -12    3.20    1.10
   9  -4 -12    3.10    1.50
  -9   4  13  117.90   13.60
  -9   4  13  122.50   16.10
  -9   4  13   95.70    5.60
   9  -4 -13   96.50   13.40
   9  -4 -13  106.40    4.00
   9  -4 -13  109.40    5.10
  -9   4  14   72.90    9.50
  -9   4  14   57.80    4.20
   9  -4 -14   72.30   12.60
   9  -4 -14   72.70    3.40
   9  -4 -14   72.80    4.20
  -9   4  15   50.70   10.80
  -9   4  15   33.20    3.40
   9  -4 -15   42.80    8.10
   9  -4 -15   45.70    2.90
   9  -4 -15   43.90    3.50
  -9   4  16   50.60   11.10
   9  -4 -16   62.40    9.90
  -9   5   1   70.30    8.40
  -9   5   1   66.70    3.50
   9  -5  -1   67.70    6.50
   9  -5  -1   69.20    2.90
  -9   5   2  225.70   22.80
  -9   5   2  229.80   23.90
  -9   5   2  215.40    6.90
   9  -5  -2  247.00   25.50
   9  -5  -2  236.20   21.70
   9  -5  -2  218.60    6.10
   9  -5  -2  213.80    7.00
  -9   5   3  183.10   20.10
  -9   5   3  185.60    6.30
   9  -5  -3  205.10   22.00
   9  -5  -3  193.60    5.70
   9  -5  -3  178.10    6.10
  -9   5   4   60.20    7.80
  -9   5   4   64.80    9.60
  -9   5   4   72.30    3.90
   9  -5  -4   65.50    9.50
   9  -5  -4   61.70    6.50
   9  -5  -4   61.40    2.70
   9  -5  -4   66.40    3.50
  -9   5   5  229.30   25.00
  -9   5   5  189.70    7.00
   9  -5  -5  221.90   24.20
   9  -5  -5  215.40   20.50
   9  -5  -5  237.90    6.80
   9  -5  -5  208.80    6.80
  -9   5   6    1.40    2.30
  -9   5   6    2.20    3.70
  -9   5   6    2.30    1.80
   9  -5  -6    6.20    3.50
   9  -5  -6    1.60    2.30
   9  -5  -6    2.80    0.90
   9  -5  -6    3.70    1.30
  -9   5   7  378.00   37.90
  -9   5   7  364.30   38.50
  -9   5   7  428.00   19.90
   9  -5  -7  407.50   41.60
   9  -5  -7  389.50   36.90
   9  -5  -7  405.00   10.40
   9  -5  -7  384.40   10.70
  -9   5   8   71.70    9.10
  -9   5   8   72.50   10.50
  -9   5   8   61.00   14.30
   9  -5  -8   78.00   11.10
   9  -5  -8   66.00    7.20
   9  -5  -8   57.80    3.10
   9  -5  -8   65.80    3.60
  -9   5   9  139.90   15.60
  -9   5   9  136.70   16.90
   9  -5  -9  134.00   16.70
   9  -5  -9  133.30   13.50
   9  -5  -9  144.80    5.50
   9  -5  -9  135.20    5.40
  -9   5  10  118.70   15.50
  -9   5  10  123.60   15.80
   9  -5 -10  121.50   15.60
   9  -5 -10  126.30    5.00
   9  -5 -10  119.70    5.10
  -9   5  11   39.30    6.40
  -9   5  11   39.80    7.80
   9  -5 -11   31.20    4.60
   9  -5 -11   40.30    2.60
  -9   5  12  207.60   24.00
  -9   5  12  201.70   11.60
   9  -5 -12  179.50   21.60
   9  -5 -12  190.50    6.00
  -9   5  13    6.50    3.40
  -9   5  13    6.30    5.40
  -9   5  13    4.90    2.90
   9  -5 -13   10.70    4.50
   9  -5 -13    8.10    1.50
   9  -5 -13    7.20    1.80
  -9   5  14  159.40   17.20
  -9   5  14  145.10    7.10
   9  -5 -14  146.40    5.00
   9  -5 -14  142.90    6.00
  -9   5  15   51.20   10.70
  -9   5  15   30.40    3.40
   9  -5 -15   43.90    8.00
   9  -5 -15   51.10    3.10
   9  -5 -15   44.20    3.40
   9  -5 -16   40.60    9.10
   9  -5 -16   46.30    3.10
   9  -5 -16   39.40    3.70
  -9   6   1  240.10    8.00
   9  -6  -1  212.70   23.40
   9  -6  -1  217.90   20.20
  -9   6   2   24.10    4.80
  -9   6   2   23.80    5.90
  -9   6   2   32.10    2.50
   9  -6  -2   26.80    5.80
   9  -6  -2   23.50    2.90
   9  -6  -2   25.30    1.70
   9  -6  -2   26.30    2.30
  -9   6   3  135.30   15.40
  -9   6   3  162.00   18.20
  -9   6   3  143.60    5.40
   9  -6  -3  153.80   17.80
   9  -6  -3  155.50   14.50
   9  -6  -3  159.10    5.00
   9  -6  -3  159.40    5.90
  -9   6   4  165.00   17.50
  -9   6   4  159.50   18.10
  -9   6   4  158.20    6.10
   9  -6  -4  178.30   19.70
   9  -6  -4  174.50   16.00
   9  -6  -4  157.50    4.90
   9  -6  -4  156.50    5.80
  -9   6   5    4.90    2.90
  -9   6   5    9.00    4.70
  -9   6   5    9.40    1.90
   9  -6  -5    7.30    3.80
   9  -6  -5    4.80    2.20
   9  -6  -5    3.60    1.00
   9  -6  -5    6.30    1.40
  -9   6   6  299.50   30.10
  -9   6   6  302.50   31.70
  -9   6   6  319.20   11.70
   9  -6  -6  331.60   33.70
   9  -6  -6  318.00   29.10
   9  -6  -6  271.50    7.10
   9  -6  -6  296.00    8.90
  -9   6   7   13.70    4.00
  -9   6   7    9.80    5.10
  -9   6   7   13.90    4.20
   9  -6  -7   12.90    4.50
   9  -6  -7   13.30    3.00
   9  -6  -7   12.80    1.50
   9  -6  -7   10.50    1.80
  -9   6   8  245.00   26.20
  -9   6   8  244.40   22.40
   9  -6  -8  237.40   26.20
   9  -6  -8  223.90    6.90
   9  -6  -8  234.90    7.80
  -9   6   9   95.60   11.30
  -9   6   9   91.90   12.70
  -9   6   9   96.90   19.60
   9  -6  -9  101.70   13.20
   9  -6  -9   88.40    8.90
   9  -6  -9   86.20    4.10
   9  -6  -9   83.60    4.20
  -9   6  10   81.90   12.30
  -9   6  10   72.40   16.20
   9  -6 -10   85.80   12.10
   9  -6 -10   90.20    4.30
   9  -6 -10   88.50    4.40
  -9   6  11   96.40   13.50
  -9   6  11  103.10   15.00
   9  -6 -11   78.90   11.60
   9  -6 -11   87.20    4.10
   9  -6 -11   86.00    4.40
  -9   6  12    2.10    5.30
  -9   6  12    4.80    4.20
   9  -6 -12    7.10    4.20
   9  -6 -12    6.60    1.80
  -9   6  13  157.40   17.30
  -9   6  13  156.50   19.90
  -9   6  13  160.70    9.80
   9  -6 -13  140.50   17.80
   9  -6 -13  155.70    5.30
   9  -6 -13  146.00    6.00
  -9   6  14    3.80    2.90
  -9   6  14    1.20    5.50
  -9   6  14    4.40    2.60
   9  -6 -14    1.90    2.70
   9  -6 -14    1.60    1.20
   9  -6 -14    1.80    1.60
  -9   6  15  128.20   17.80
   9  -6 -15  100.50   13.60
   9  -6 -15  104.80    5.40
  -9   6  16   17.70    3.10
   9  -6 -16   29.30    2.60
   9  -6 -16   26.30    3.20
  -9   7   1   39.00    7.10
  -9   7   1   38.90    2.70
   9  -7  -1   33.90    6.30
   9  -7  -1   34.20    3.30
   9  -7  -1   35.80    2.10
   9  -7  -1   31.30    2.50
  -9   7   2  220.80   23.10
  -9   7   2  202.40    6.90
   9  -7  -2  218.70   23.30
   9  -7  -2  202.40    5.90
   9  -7  -2  208.00    7.00
  -9   7   3   99.40   11.70
  -9   7   3   86.70   11.50
  -9   7   3   88.20    4.20
   9  -7  -3  104.50   13.00
   9  -7  -3   96.90    8.90
  -9   7   4   67.30    3.90
   9  -7  -4   60.40    8.90
   9  -7  -4   69.60    6.70
   9  -7  -4   65.80    3.00
   9  -7  -4   66.80    3.70
  -9   7   5  237.80   24.70
  -9   7   5  250.00   26.30
  -9   7   5  231.80    8.40
   9  -7  -5  249.90   26.70
   9  -7  -5  241.50   22.50
   9  -7  -5  264.30    7.40
   9  -7  -5  230.90    7.50
  -9   7   6    2.70    2.40
  -9   7   6    3.90    4.50
  -9   7   6    4.30    2.00
   9  -7  -6    3.60    3.40
   9  -7  -6    4.20    2.30
   9  -7  -6    4.00    1.10
   9  -7  -6    4.50    1.40
  -9   7   7  417.60   41.60
  -9   7   7  440.00   44.10
  -9   7   7  450.20   18.00
   9  -7  -7  434.60   44.10
   9  -7  -7  416.30   39.10
   9  -7  -7  414.10   10.50
   9  -7  -7  414.60   11.50
  -9   7   8   11.40    3.90
  -9   7   8   10.30    5.10
  -9   7   8   10.10    8.20
   9  -7  -8    9.40    3.60
   9  -7  -8    6.70    2.30
   9  -7  -8   12.60    1.80
   9  -7  -8    8.70    1.80
  -9   7   9  135.00   15.20
  -9   7   9  143.00   17.20
  -9   7   9  123.80   22.30
   9  -7  -9  142.30   17.10
   9  -7  -9  142.20   13.50
   9  -7  -9  131.90    5.30
   9  -7  -9  141.00    5.80
  -9   7  10   33.80    6.00
  -9   7  10   35.60    8.30
  -9   7  10   32.80   15.10
   9  -7 -10   34.00    7.20
   9  -7 -10   42.70    4.90
   9  -7 -10   42.20    3.00
   9  -7 -10   34.90    2.80
  -9   7  11   43.30    9.00
  -9   7  11   41.50   12.60
   9  -7 -11   46.10    8.10
   9  -7 -11   58.60    3.60
   9  -7 -11   52.50    3.50
  -9   7  12  133.80   17.20
   9  -7 -12  113.80   15.00
   9  -7 -12  122.60    5.50
  -9   7  13    0.90    2.30
  -9   7  13    0.50    4.70
  -9   7  13   -0.70    3.80
   9  -7 -13   -0.60    2.80
   9  -7 -13    1.50    1.10
   9  -7 -13    0.90    1.60
  -9   7  14  114.90   13.60
  -9   7  14   98.10   15.50
  -9   7  14  109.10    7.90
   9  -7 -14  101.90   14.00
   9  -7 -14  115.50    4.50
   9  -7 -14  103.70    5.20
  -9   7  15    1.70    5.40
  -9   7  15    3.70    2.70
   9  -7 -15    0.40    1.10
   9  -7 -16   78.80    3.80
   9  -7 -16   66.10    4.50
  -9   8   1  243.30   25.10
  -9   8   1  237.20    7.80
   9  -8  -1  221.70   23.90
   9  -8  -1  217.80    6.20
   9  -8  -1  229.20    7.70
  -9   8   2    7.60    4.40
  -9   8   2    7.40    1.50
   9  -8  -2    9.30    3.70
   9  -8  -2   11.00    2.30
   9  -8  -2   10.10    1.30
   9  -8  -2    8.70    1.60
  -9   8   3  228.80   24.40
   9  -8  -3  228.40   24.50
   9  -8  -3  237.60   21.40
   9  -8  -3  212.90    7.20
  -9   8   4  151.90   17.50
   9  -8  -4  152.30   17.30
   9  -8  -4  148.60   13.70
   9  -8  -4  142.60    5.70
   9  -8  -5   80.20    7.50
   9  -8  -5   70.20    3.80
  -9   8   6  278.40   28.80
  -9   8   6  264.20   28.60
   9  -8  -6  292.60   30.90
   9  -8  -6  287.20   26.50
   9  -8  -6  287.40    9.10
  -9   8   7    5.10    4.70
   9  -8  -7    0.80    2.60
   9  -8  -7    3.90    1.40
  -9   8   8  141.40   16.50
  -9   8   8  161.20   18.60
   9  -8  -8  156.10   18.60
   9  -8  -8  156.80   14.70
   9  -8  -8  161.40    6.40
  -9   8   9    6.70    3.60
  -9   8   9   12.80    5.50
  -9   8   9   16.00   13.60
   9  -8  -9   10.80    4.40
   9  -8  -9    7.30    2.30
   9  -8  -9    5.90    1.70
   9  -8  -9    7.90    1.70
  -9   8  10   91.20   11.80
  -9   8  10  100.70   13.80
   9  -8 -10   94.40   12.60
   9  -8 -10  104.90    9.90
   9  -8 -10   91.70    4.40
   9  -8 -10   98.10    4.80
  -9   8  11   43.40    9.10
  -9   8  11   21.70   12.60
   9  -8 -11   26.10    6.10
   9  -8 -11   23.50    2.60
   9  -8 -11   26.40    2.70
  -9   8  12   35.10    8.80
  -9   8  12   35.30   12.20
   9  -8 -12   29.50    6.40
   9  -8 -12   43.00    3.00
   9  -8 -12   36.00    3.30
  -9   8  13  108.80   11.10
   9  -8 -13  136.10    5.20
   9  -8 -13  112.10    5.50
  -9   8  14    6.10    5.90
  -9   8  14    0.90    3.60
   9  -8 -14    1.40    3.30
   9  -8 -14    1.10    1.20
   9  -8 -14    0.50    1.50
  -9   8  15  140.50   19.30
   9  -8 -15  134.30   16.70
   9  -8 -15  120.40    4.50
   9  -8 -15  108.90    5.50
  -9   8  16    1.50    2.20
   9  -8 -16    5.60    1.50
   9  -8 -16    4.80    1.90
  -9   9   1   23.90    6.30
  -9   9   1   19.70    2.20
   9  -9  -1   17.60    4.60
   9  -9  -1   19.50    2.90
   9  -9  -1   15.20    1.50
   9  -9  -1   16.70    2.10
  -9   9   2  278.00   28.20
  -9   9   2  238.00    7.80
   9  -9  -2  251.30   26.70
   9  -9  -2  276.50   24.60
   9  -9  -2  240.80    6.70
  -9   9   3   66.80    9.90
  -9   9   3   69.80    3.90
   9  -9  -3   86.70   11.30
   9  -9  -3   82.30    7.60
   9  -9  -3   83.80    3.50
  -9   9   4  132.80    5.90
   9  -9  -4  131.70   12.20
   9  -9  -4  129.30    4.60
   9  -9  -4  129.40    5.80
  -9   9   5  137.40   16.50
  -9   9   5  132.20    6.20
   9  -9  -5  156.20   17.70
   9  -9  -5  139.10   13.10
   9  -9  -5  157.50    5.30
   9  -9  -5  143.70    5.90
  -9   9   6   51.80    8.70
   9  -9  -6   54.00    8.70
   9  -9  -6   48.00    2.60
   9  -9  -6   59.40    3.70
  -9   9   7  169.00   19.70
  -9   9   7  189.90   10.70
   9  -9  -7  173.00   20.00
   9  -9  -7  186.30   17.10
   9  -9  -7  183.50    6.00
   9  -9  -7  178.90    6.90
  -9   9   8   -1.50    3.90
  -9   9   8    6.50    7.00
   9  -9  -8    5.30    3.80
   9  -9  -8   -0.70    1.70
   9  -9  -8    2.20    1.20
  -9   9   9   40.80   15.10
   9  -9  -9   70.10    6.80
   9  -9  -9   67.30    3.70
  -9   9  10   35.30    8.30
  -9   9  10   12.00   18.10
   9  -9 -10   32.60    6.90
   9  -9 -10   40.40    4.60
   9  -9 -10   42.00    3.30
   9  -9 -10   45.20    3.30
  -9   9  11  110.20   14.40
  -9   9  11   95.10   21.60
   9  -9 -11   97.90   13.10
   9  -9 -11   97.10    9.60
   9  -9 -11  102.30    4.80
   9  -9 -11   94.80    4.90
  -9   9  12  113.60   15.60
  -9   9  12  100.40   18.30
   9  -9 -12  106.80   13.80
   9  -9 -12   96.80    4.50
   9  -9 -12   96.90    5.00
  -9   9  13   24.50    7.70
  -9   9  13   13.10    8.00
   9  -9 -13   19.60    5.50
   9  -9 -13   19.70    2.40
   9  -9 -13   17.80    2.50
  -9   9  14  137.00   18.00
  -9   9  14  117.80   10.80
   9  -9 -14  119.50   15.40
   9  -9 -14  113.80    4.60
   9  -9 -14  105.50    5.40
   9  -9 -15    0.50    1.10
   9  -9 -15   -0.30    1.30
  -9   9  16   47.20    5.50
   9  -9 -16   65.10    3.40
   9  -9 -16   56.50    4.50
   9  -9 -17   20.20    2.80
   9  -9 -17   12.20    2.40
  -9  10   1  214.70   23.30
  -9  10   1  215.70    7.50
   9 -10  -1  212.20   23.10
   9 -10  -1  225.80   20.50
   9 -10  -1  209.20    6.20
   9 -10  -1  210.60    7.50
  -9  10   2    8.40    4.60
  -9  10   2    9.30    1.70
   9 -10  -2   12.80    4.30
   9 -10  -2   11.30    2.70
   9 -10  -2   12.00    1.40
   9 -10  -2   10.60    1.80
  -9  10   3  128.00    5.80
   9 -10  -3  118.00   11.00
   9 -10  -3  120.10    4.40
   9 -10  -3  113.90    5.10
  -9  10   4   43.40    7.80
  -9  10   4   48.50    3.60
   9 -10  -4   48.00    7.80
   9 -10  -4   55.70    5.60
   9 -10  -4   56.80    2.90
   9 -10  -4   49.20    3.30
  -9  10   5   81.80   11.40
  -9  10   5   84.30    5.20
   9 -10  -5   80.80   11.00
   9 -10  -5   74.10    3.30
   9 -10  -5   83.30    4.40
  -9  10   6  164.40   18.50
  -9  10   6  171.30    8.50
   9 -10  -6  153.20   17.90
   9 -10  -6  165.00   14.90
   9 -10  -6  136.00    4.70
   9 -10  -6  146.30    5.90
  -9  10   7   16.20    5.40
  -9  10   7   10.40    3.70
   9 -10  -7   22.10    5.70
   9 -10  -7   15.10    2.50
   9 -10  -7   13.50    1.70
   9 -10  -7   18.50    2.30
  -9  10   8  104.30   14.40
  -9  10   8  123.80   15.60
   9 -10  -8  120.70   16.10
   9 -10  -8  105.30   10.00
   9 -10  -8  107.60    4.50
   9 -10  -8  105.90    5.10
  -9  10   9   -2.30    4.70
  -9  10   9    4.60   10.40
   9 -10  -9    1.30    3.10
   9 -10  -9    1.20    2.10
   9 -10  -9    2.90    1.40
   9 -10  -9    0.30    1.20
  -9  10  10   95.90   13.70
  -9  10  10   84.70   25.90
   9 -10 -10  111.70   14.50
   9 -10 -10  111.60   10.60
   9 -10 -10  108.10    4.90
   9 -10 -10  110.50    5.30
  -9  10  11   67.90   11.50
  -9  10  11   37.70   18.00
   9 -10 -11   67.30   10.10
   9 -10 -11   68.10    6.90
   9 -10 -11   81.70    4.30
   9 -10 -11   70.90    4.30
   9 -10 -12   64.20    6.40
   9 -10 -12   57.20    3.90
  -9  10  13  126.40   16.90
  -9  10  13  126.00   18.70
   9 -10 -13  123.20   15.60
   9 -10 -13  106.30    4.60
   9 -10 -13  105.10    5.30
  -9  10  14   12.80    7.80
  -9  10  14   11.30    6.00
   9 -10 -14   11.70    5.20
   9 -10 -14   11.00    1.80
   9 -10 -14    7.70    2.00
  -9  10  15  141.50   10.20
   9 -10 -15  123.80    4.60
   9 -10 -15  119.60    6.00
   9 -10 -16    4.00    1.40
   9 -10 -16    4.10    1.80
   9 -10 -17   39.20    3.80
  -9  11   1   19.10    6.30
  -9  11   1   19.00    2.30
   9 -11  -1   13.60    4.40
   9 -11  -1   16.90    3.00
   9 -11  -1   14.90    1.50
   9 -11  -1   19.90    2.30
  -9  11   2  121.20    5.50
   9 -11  -2  132.70   12.40
   9 -11  -2  137.40    4.80
   9 -11  -2  127.90    5.60
  -9  11   3   20.50    6.50
   9 -11  -3   21.40    5.30
   9 -11  -3   18.30    3.10
   9 -11  -3   21.00    2.30
   9 -11  -4  114.70   14.20
   9 -11  -4  119.30    5.30
  -9  11   5   56.10    9.50
   9 -11  -5   53.50    8.30
   9 -11  -5   59.30    5.90
   9 -11  -5   55.50    3.60
  -9  11   6   69.30   10.50
   9 -11  -6   67.60    9.80
   9 -11  -6   64.50    6.40
   9 -11  -6   67.70    4.00
  -9  11   7  122.40   16.30
   9 -11  -7  123.00   11.50
   9 -11  -7  130.50    5.70
  -9  11   8    7.60    5.00
   9 -11  -8    3.00    3.10
   9 -11  -8    5.40    2.00
   9 -11  -8    5.80    1.70
  -9  11   9  125.10   15.60
  -9  11   9  106.50   21.60
   9 -11  -9  131.50   15.80
   9 -11  -9  120.60   11.70
   9 -11  -9  128.30    5.30
   9 -11  -9  120.00    5.50
  -9  11  10    1.90    4.30
  -9  11  10    0.30   18.30
   9 -11 -10    3.00    2.80
   9 -11 -10    1.90    2.20
   9 -11 -10    4.00    1.60
   9 -11 -10    2.60    1.60
  -9  11  11  133.20   27.90
   9 -11 -11  161.30   14.90
   9 -11 -11  157.40    6.20
   9 -11 -11  150.40    6.40
  -9  11  12   72.30   12.50
  -9  11  12  108.10   21.90
   9 -11 -12   74.60   11.70
   9 -11 -12   76.40    8.20
   9 -11 -12   97.20    4.70
  -9  11  13   33.70    9.00
  -9  11  13   46.20   13.70
   9 -11 -13   28.00    7.10
   9 -11 -13   37.10    2.80
   9 -11 -13   35.00    3.30
  -9  11  14   72.80   10.80
   9 -11 -14   75.50    3.80
   9 -11 -14   63.40    4.30
  -9  11  15    3.50    3.90
   9 -11 -15    2.90    1.40
   9 -11 -15    4.60    1.80
  -9  11  16   34.50    4.70
  -9  12   1   96.40   13.20
  -9  12   1   99.60    5.00
   9 -12  -1  105.00   13.10
   9 -12  -1  105.50   10.30
   9 -12  -1   99.00    3.80
  -9  12   2    6.60    5.70
  -9  12   2    5.80    1.60
   9 -12  -2   10.10    3.90
   9 -12  -2    8.10    3.00
   9 -12  -2    8.40    1.20
   9 -12  -2    6.40    1.60
  -9  12   3  131.40   16.50
  -9  12   3  131.30    6.20
   9 -12  -3  136.40   16.20
   9 -12  -3  154.60   14.20
   9 -12  -3  144.80    5.00
   9 -12  -3  130.00    5.60
  -9  12   4    5.30    4.90
  -9  12   4    9.80    2.30
   9 -12  -4    9.20    4.00
   9 -12  -4    5.90    2.50
   9 -12  -4   10.80    1.40
  -9  12   5  117.20   15.20
  -9  12   5  140.90    7.70
   9 -12  -5  141.80   16.50
   9 -12  -5  146.40   13.50
   9 -12  -5  127.90    4.60
  -9  12   6   92.80    7.00
   9 -12  -6   69.30    6.70
   9 -12  -6   66.70    3.10
  -9  12   7   73.70   11.00
  -9  12   7   75.00    8.50
   9 -12  -7   80.20   11.10
   9 -12  -7   75.40    7.60
   9 -12  -7   83.30    3.80
  -9  12   8  106.40   14.00
  -9  12   8  161.40   18.30
   9 -12  -8  102.40   13.30
   9 -12  -8  108.70   10.40
   9 -12  -8  118.40    4.90
   9 -12  -8  109.10    5.30
  -9  12   9    8.70    5.10
  -9  12   9    9.80   14.00
   9 -12  -9   10.90    4.10
   9 -12  -9    8.20    2.30
   9 -12  -9    7.80    1.80
   9 -12  -9   10.50    2.00
  -9  12  10  128.70   16.60
  -9  12  10  143.10   31.20
   9 -12 -10  117.40   15.10
   9 -12 -10  125.30   11.70
   9 -12 -10  129.80    5.50
   9 -12 -10  115.70    5.40
  -9  12  11   13.70    5.90
  -9  12  11   32.10   22.00
   9 -12 -11   17.40    4.90
   9 -12 -11   15.60    2.70
   9 -12 -11   18.30    2.40
   9 -12 -11   15.90    2.40
  -9  12  12  101.40   14.40
  -9  12  12   80.10   20.70
   9 -12 -12   75.90   11.20
   9 -12 -12   90.00    4.60
   9 -12 -12   88.30    4.90
  -9  12  13   29.10   14.70
   9 -12 -13   44.50   10.70
   9 -12 -13   43.70    3.50
  -9  12  14   10.60    7.40
   9 -12 -14    9.30    1.70
   9 -12 -14   10.00    2.30
  -9  12  15   21.30    5.40
   9 -12 -15   38.50    2.80
  -9  12  16    0.90    2.50
   9 -12 -16    2.90    1.60
  -9  13   1   32.60    8.70
  -9  13   1   32.90    3.30
   9 -13  -1   31.20    6.40
   9 -13  -1   32.30    2.20
  -9  13   2  116.60   15.60
  -9  13   3    2.40    1.70
   9 -13  -3    1.10    2.80
   9 -13  -3    4.70    2.80
   9 -13  -3    3.70    1.10
   9 -13  -3    4.30    1.50
  -9  13   4  124.50   16.00
  -9  13   4  141.30    7.40
   9 -13  -4  138.10   16.20
   9 -13  -4  134.30   12.80
   9 -13  -4  114.10    4.20
   9 -13  -4  123.90    5.50
  -9  13   5    7.70    5.60
   9 -13  -5    7.60    3.70
   9 -13  -5    5.90    2.60
   9 -13  -5    4.60    1.20
   9 -13  -5    7.00    1.60
  -9  13   6  151.40   18.10
  -9  13   6  148.80    9.50
   9 -13  -6  147.70   17.20
   9 -13  -6  126.30   13.20
   9 -13  -6  152.50    5.40
   9 -13  -6  140.10    5.90
  -9  13   7   88.70   13.00
  -9  13   7   95.90   10.60
   9 -13  -7   83.60   11.30
   9 -13  -7   91.80    9.00
   9 -13  -7   89.80    4.10
   9 -13  -7   92.30    4.70
  -9  13   8   48.00    9.20
  -9  13   8   70.90   15.40
   9 -13  -8   44.70    7.80
   9 -13  -8   45.80    5.20
   9 -13  -8   51.10    3.20
   9 -13  -8   50.20    3.60
  -9  13   9   95.90   20.30
   9 -13  -9  100.50    9.50
   9 -13  -9   99.70    4.70
   9 -13  -9  107.50    5.20
  -9  13  10    0.70    4.50
   9 -13 -10    0.10    2.70
   9 -13 -10    0.40    2.20
   9 -13 -10    2.00    1.30
  -9  13  11  114.50   15.40
  -9  13  11   84.20   25.30
   9 -13 -11  114.20   14.40
   9 -13 -11   99.40    4.80
   9 -13 -11  106.50    5.30
  -9  13  12   21.80    7.00
  -9  13  12   15.90   15.90
   9 -13 -12   22.30    5.50
   9 -13 -12   16.10    2.40
   9 -13 -12   20.40    2.70
   9 -13 -13   38.10    3.10
  -9  13  14   22.90    8.00
   9 -13 -14   23.20    2.40
  -9  13  15    2.40    2.90
   9 -13 -15    3.70    2.00
  -9  14   1   66.80   12.60
  -9  14   1   96.20    5.60
   9 -14  -1   92.90   12.00
   9 -14  -1   82.80    9.10
   9 -14  -1   97.60    3.90
  -9  14   2    3.80    6.50
  -9  14   2    7.20    2.20
   9 -14  -2    5.50    3.20
   9 -14  -2    9.30    3.30
   9 -14  -2    8.70    1.40
  -9  14   3  136.10    7.20
   9 -14  -3  117.40   15.30
   9 -14  -3  127.40   12.50
   9 -14  -3  120.40    4.30
  -9  14   4    0.50    4.80
  -9  14   4    3.10    2.10
   9 -14  -4    0.10    2.30
   9 -14  -4    1.80    2.70
   9 -14  -4    1.50    0.90
  -9  14   5  101.10   14.10
  -9  14   5  122.20    8.10
   9 -14  -5   93.10   12.20
   9 -14  -5  102.70   10.20
   9 -14  -5  108.20    4.20
  -9  14   6    6.00    5.20
  -9  14   6    6.00    3.80
   9 -14  -6    8.00    3.70
   9 -14  -6   12.70    3.50
   9 -14  -6    7.80    1.40
  -9  14   7   43.90    9.10
  -9  14   7   45.20    9.20
   9 -14  -7   38.90    7.10
   9 -14  -7   43.10    5.30
   9 -14  -7   42.90    2.80
  -9  14   8   48.90   10.40
  -9  14   8   64.50   16.20
   9 -14  -8   63.90    9.70
   9 -14  -8   48.40    5.50
   9 -14  -8   55.30    3.40
  -9  14   9    3.40    5.30
  -9  14   9    2.10   10.90
   9 -14  -9    4.00    3.00
   9 -14  -9    0.60    1.10
  -9  14  10  138.70   17.60
  -9  14  10  140.20   29.20
   9 -14 -10  141.70   16.90
   9 -14 -10  149.40    5.90
  -9  14  11   17.40   19.30
   9 -14 -11   17.80    2.40
  -9  14  12   29.10   14.70
   9 -14 -12   60.90    3.70
   9 -15  -1   37.70    8.50
   9 -15  -1   40.80    5.90
  -9  15   2   33.60    8.40
   9 -15  -2   36.00    7.30
   9 -15  -2   39.00    5.90
  -9  15   3    3.60    4.70
   9 -15  -3    6.40    3.40
   9 -15  -3    8.20    3.50
  -9  15   4   66.10   10.80
   9 -15  -4   96.40   12.20
   9 -15  -4   88.00    9.20
  -9  15   5   -1.00    4.40
  -9  15   5   -1.00    3.20
   9 -15  -5    1.70    3.40
   9 -15  -5   -0.50    0.90
  -9  15   6   80.00    9.10
   9 -15  -6  101.30   10.00
   9 -15  -6   86.60    3.90
  -9  15   7   22.20    7.00
  -9  15   7   31.10    9.40
   9 -15  -7   34.70    7.00
   9 -15  -7   22.40    3.90
   9 -15  -7   33.40    2.70
  -9  15   8   22.80    7.00
  -9  15   8   17.60   10.90
   9 -15  -8   27.30    6.10
   9 -15  -8   15.70    2.40
  -9  15   9   68.20   11.10
   9 -15  -9   85.90   11.50
   9 -16  -1   45.70    9.10
   9 -16  -1   53.40    8.10
  -9  16   2   26.20    7.60
   9 -16  -2   27.30    6.50
   9 -16  -2   36.20    6.30
  -9  16   3   32.10    7.70
   9 -16  -3   77.60   11.40
   9 -16  -3   76.80    8.80
   9 -16  -4    2.50    3.30
   9 -16  -4    2.90    3.20
  -9  16   5   70.40   11.40
   9 -16  -5  102.20   12.80
  -9  16   6    9.50    5.60
   9 -16  -6   16.50    5.10
  -9  16   7   44.50    9.00
   9 -16  -7   48.30    8.80
  -9  17   5    0.80    3.90
   9 -17  -5    4.10    4.30
   8  18  -1   14.80    3.60
   8  18  -2  146.40   15.10
  -8 -17   1   92.20   12.90
   8  17  -1   94.20    4.70
  -8 -17   2    0.10    2.90
   8  17  -2    2.60    2.80
   8  17  -3  137.10   14.20
   8  17  -4   17.00    4.30
  -8 -16   1   17.20    5.40
  -8 -16   1   16.90    1.40
  -8 -16   1   15.70    1.80
   8  16  -1   18.70    4.10
   8  16  -1   17.00    2.00
  -8 -16   2  198.70   23.00
   8  16  -2  197.20   19.90
  -8 -16   3    3.20    3.40
   8  16  -4  119.30   12.90
   8  16  -5   20.10    4.50
  -8 -15   1  138.80   17.00
   8  15  -1  144.80   14.70
   8  15  -1  122.40    4.20
   8  15  -2    4.20    3.00
  -8 -15   3  142.90   18.40
   8  15  -3  145.90   15.40
  -8 -15   4   15.70    5.20
   8  15  -4   17.30    4.50
  -8 -15   5   80.70   12.00
   8  15  -5   93.70   11.00
   8  15  -6   32.60    6.00
   8  15  -7   20.80    5.60
  -8 -14   1  110.10   14.40
  -8 -14   1  100.50    3.00
   8  14  -1  118.20   12.60
   8  14  -1  115.20   15.60
  -8 -14   2  151.40   18.50
   8  14  -2  148.40   19.50
  -8 -14   3    3.10    3.60
   8  14  -3    7.80    3.70
  -8 -14   4   87.20   13.00
   8  14  -4  100.80   11.60
  -8 -14   5   11.40    4.90
   8  14  -5   14.60    4.70
  -8 -14   6   50.10    8.80
   8  14  -7   53.60    7.80
   8  14  -8   13.70    4.80
  -8 -13   1  236.30   25.80
   8  13  -1  221.60   22.60
   8  13  -1  228.50   26.10
  -8 -13   2   60.80    9.80
   8  13  -2   64.30    8.00
   8  13  -2   57.80   11.30
  -8 -13   3  162.60   19.80
   8  13  -3  161.40   17.10
   8  13  -3  172.40   21.30
  -8 -13   4    4.00    3.90
   8  13  -4    3.10    4.40
  -8 -13   5  129.40   17.80
   8  13  -5  133.90   15.00
  -8 -13   6   29.70    6.90
   8  13  -6   25.20    5.70
  -8 -13   7   70.10   10.70
   8  13  -7   49.20    7.80
  -8 -13   8   61.60   11.40
   8  13  -8   79.40   10.30
   8  13  -9   27.00    6.20
  -8 -12   1  118.50   14.90
  -8 -12   1  122.00    3.20
   8  12  -1  133.20   14.20
   8  12  -1  128.40   16.80
   8  12  -2  185.00   19.20
  -8 -12   3    3.90    3.90
   8  12  -3    4.20    3.00
   8  12  -3   -0.10    5.40
  -8 -12   4  109.30   14.40
   8  12  -4   88.90   10.80
   8  12  -4   96.50   13.70
  -8 -12   5    1.50    3.10
   8  12  -5    4.90    5.50
  -8 -12   6  201.00   23.40
   8  12  -6  192.40   20.60
  -8 -12   7   83.80   12.30
   8  12  -7   81.30   10.60
  -8 -12   8   59.30   10.00
   8  12  -8   65.50    9.30
  -8 -12   9   54.90    9.00
   8  12  -9   47.80    8.00
   8  12 -10   38.30    7.50
  -8 -11   1  185.60   20.80
   8  11  -1  168.50   20.10
  -8 -11   2  105.80   13.90
   8  11  -2  109.10   12.50
   8  11  -2  111.20   15.00
  -8 -11   3  156.70   19.10
   8  11  -3  152.10   16.70
   8  11  -3  181.20   21.00
  -8 -11   4   29.70    6.90
   8  11  -4   29.30    5.50
   8  11  -4   25.20    7.40
  -8 -11   5  135.90   17.40
   8  11  -5  162.60   17.60
   8  11  -5  158.30   19.10
  -8 -11   6    8.60    3.90
   8  11  -6    7.00    4.00
   8  11  -6    7.10    5.70
  -8 -11   7  160.20   19.60
   8  11  -7  153.90   17.40
  -8 -11   8   42.70    8.30
   8  11  -8   48.30    8.20
  -8 -11   9   28.00    6.80
   8  11  -9   44.20    8.20
  -8 -11  10   59.70    9.60
   8  11 -10   74.50   10.40
   8  11 -11    2.50    4.20
  -8 -10   1  354.70   36.20
   8  10  -1  322.80   32.80
   8  10  -1  336.30   35.10
  -8 -10   2   89.70   12.30
   8  10  -2   90.70   11.00
   8  10  -2   91.60   12.60
  -8 -10   3   88.30   12.30
  -8 -10   4  204.50   23.40
   8  10  -4  197.00   21.10
   8  10  -4  208.60   23.30
  -8 -10   5    8.50    4.20
   8  10  -5    9.00    4.00
   8  10  -5    8.70    4.90
  -8 -10   6  180.70   21.70
   8  10  -6  204.20   21.70
   8  10  -6  190.00   22.70
  -8 -10   7   39.20    8.00
   8  10  -7   32.00    6.60
   8  10  -7   25.50    7.20
  -8 -10   8  126.60   16.40
   8  10  -8  134.30   15.90
  -8 -10   9   64.10   10.20
   8  10  -9   79.10   11.20
  -8 -10  10   12.40    4.80
   8  10 -10   19.60    6.30
  -8 -10  11   55.20    8.80
   8  10 -11   64.60    9.80
   8  10 -12    4.00    3.90
  -8  -9   1   60.30    9.20
   8   9  -1   71.90    9.40
   8   9  -1   57.50    9.20
  -8  -9   2  177.20   20.70
   8   9  -2  188.50   20.40
   8   9  -2  186.00   21.00
  -8  -9   3   96.40   13.10
   8   9  -3  101.40   12.70
   8   9  -3  108.70   13.60
  -8  -9   4  118.10   15.10
   8   9  -4  114.60   14.70
   8   9  -5  310.80   32.20
   8   9  -5  304.00   32.40
  -8  -9   6    5.40    3.80
   8   9  -6   10.80    4.40
   8   9  -6    5.00    4.70
  -8  -9   7  163.90   19.70
   8   9  -7  161.80   19.00
   8   9  -7  163.60   19.70
  -8  -9   8   42.60    8.00
   8   9  -8   39.70    7.90
   8   9  -8   33.20    7.90
  -8  -9   9  140.80   17.00
   8   9  -9  134.70   16.70
  -8  -9  10  141.20   17.60
   8   9 -10  161.60   19.20
  -8  -9  11    6.50    3.60
   8   9 -11    8.90    5.30
   8   9 -12   51.80    9.50
   8   8  -1  609.70   59.80
  -8  -8   2  182.50   20.90
   8   8  -2  194.40   20.80
   8   8  -2  169.00   19.40
  -8  -8   3   62.80    9.70
   8   8  -3   66.70    9.60
   8   8  -3   67.70   10.00
  -8  -8   4  315.40   33.20
   8   8  -4  310.40   32.30
   8   8  -4  303.60   31.90
  -8  -8   5   42.10    7.70
   8   8  -5   32.50    7.40
  -8  -8   6  381.70   39.70
   8   8  -6  373.40   38.30
   8   8  -6  362.50   38.20
  -8  -8   7   14.40    5.30
   8   8  -7   21.90    5.70
   8   8  -7   12.80    5.60
  -8  -8   8  149.70   17.90
   8   8  -8  160.00   18.60
   8   8  -8  130.40   16.90
  -8  -8   9   32.80    7.00
   8   8  -9   27.90    7.40
   8   8  -9   33.30    8.00
  -8  -8  10   49.10    8.70
   8   8 -10   55.20   10.00
  -8  -8  11  125.10   15.60
   8   8 -11  131.10   17.10
  -8  -8  12    7.50    4.20
   8   8 -13   89.80   13.30
   8   7  -1   15.80    4.50
   8   7  -2  240.20   25.60
  -8  -7   3  251.10   26.90
   8   7  -3  244.10   26.00
   8   7  -3  234.60   25.10
  -8  -7   4  167.10   19.60
   8   7  -4  168.50   19.30
   8   7  -4  191.10   20.70
  -8  -7   5  267.90   28.90
   8   7  -5  267.30   28.50
   8   7  -5  267.90   28.50
  -8  -7   6   12.80    4.60
   8   7  -6   18.20    6.20
  -8  -7   7  372.60   39.10
   8   7  -7  380.40   39.20
   8   7  -7  391.20   39.80
  -8  -7   8   25.00    6.00
   8   7  -8   26.60    6.20
   8   7  -8   18.50    5.70
  -8  -7   9  121.80   15.30
   8   7  -9  119.70   15.50
   8   7  -9  121.40   15.60
  -8  -7  10   54.00    8.50
   8   7 -10   52.50    9.30
   8   7 -11   45.80    9.50
  -8  -7  12   62.50    9.40
   8   7 -12   71.70   11.60
  -8  -7  13   14.30    4.60
   8   7 -13   17.80    6.30
   8   7 -14   84.90   12.90
  -8  -6   1  725.90   22.60
   8   6  -1  584.00   59.00
   8   6  -1  607.80   12.50
   8   6  -2    7.80    3.50
  -8  -6   3  371.00   37.30
   8   6  -3  367.30   37.50
  -8  -6   4  419.60   42.50
  -8  -6   4  402.80   40.70
   8   6  -4  412.40   41.50
   8   6  -4  392.00   40.00
  -8  -6   5   78.80   11.20
  -8  -6   5   95.50   12.50
   8   6  -5   86.60   11.40
   8   6  -5   96.80   12.40
  -8  -6   6  159.40   18.50
  -8  -6   6  157.00   18.50
   8   6  -6  156.30   18.30
   8   6  -6  146.10   18.10
  -8  -6   7   45.40    7.90
  -8  -6   7   47.70    9.10
   8   6  -7   34.10    6.60
   8   6  -7   39.00    7.30
  -8  -6   8  252.60   27.90
  -8  -6   8  224.70   25.70
   8   6  -8  239.40   26.10
   8   6  -8  224.30   25.30
  -8  -6   9   26.50    6.30
  -8  -6   9   28.90    7.70
   8   6  -9   24.20    6.20
   8   6  -9   20.30    5.90
  -8  -6  10   98.10   12.60
   8   6 -10   96.90   13.30
   8   6 -10  103.50   13.30
  -8  -6  11   53.30    8.40
   8   6 -11   48.40    9.30
  -8  -6  12   47.50    7.80
   8   6 -12   56.80   10.30
  -8  -6  13  112.10   13.70
   8   6 -13  116.10   16.00
   8   6 -14    3.20    5.00
  -8  -5   1   34.10    6.10
  -8  -5   1   33.10    1.40
  -8  -5   1   33.80    1.90
   8   5  -1   32.30    5.70
   8   5  -1   27.60    5.40
   8   5  -1   30.00    1.10
  -8  -5   2  170.80   18.40
   8   5  -2  172.20   19.00
  -8  -5   3    8.00    4.20
   8   5  -3   12.80    4.10
  -8  -5   4  258.20   26.80
   8   5  -4  240.70   26.10
  -8  -5   5  331.70   35.30
  -8  -5   5  357.00   36.20
   8   5  -5  367.60   37.30
   8   5  -5  356.80   35.80
  -8  -5   6   20.10    5.00
  -8  -5   6   12.50    5.20
   8   5  -6   19.90    5.50
   8   5  -6   22.10    5.70
  -8  -5   7  144.40   17.10
  -8  -5   7  155.40   18.50
   8   5  -7  155.70   18.40
   8   5  -7  157.70   18.00
  -8  -5   8   23.90    7.40
   8   5  -8   19.40    5.30
   8   5  -8   14.50    5.40
  -8  -5   9  259.40   27.80
  -8  -5   9  262.40   28.80
   8   5  -9  243.40   27.10
   8   5  -9  262.30   28.80
  -8  -5  10   74.40   10.20
  -8  -5  10   67.60   11.40
   8   5 -10   80.80   11.80
   8   5 -10   66.70    9.80
  -8  -5  11   51.80    7.90
   8   5 -11   44.80    8.00
  -8  -5  12   92.80   14.80
   8   5 -12   88.50   13.10
  -8  -5  13   24.70    5.30
  -8  -5  13   31.50    9.60
   8   5 -13   18.10    6.90
   8   5 -14  136.10   18.10
   8   5 -15   -0.50    4.70
  -8  -4   1  527.40   52.40
  -8  -4   1  538.20   51.90
  -8  -4   1  524.50   11.30
   8   4  -1  561.20   53.90
   8   4  -1  534.60   51.70
  -8  -4   2   14.20    0.90
  -8  -4   2   13.40    1.00
   8   4  -2   13.40    0.70
   8   4  -2   13.00    0.70
  -8  -4   3  222.10   22.80
   8   4  -3  192.50   21.30
  -8  -4   4  127.10   14.50
   8   4  -4  121.00   14.50
   8   4  -4  105.80   12.70
  -8  -4   5  235.60   25.50
  -8  -4   5  237.40   25.30
   8   4  -5  241.50   25.90
   8   4  -5  251.60   25.70
  -8  -4   6  342.80   35.30
  -8  -4   6  346.80   35.40
   8   4  -6  341.00   35.30
   8   4  -6  335.20   34.20
  -8  -4   7   23.80    5.30
  -8  -4   7   27.00    6.40
   8   4  -7   23.70    5.60
   8   4  -7   23.60    6.00
  -8  -4   8  190.70   20.90
   8   4  -8  176.20   19.70
  -8  -4   9    5.70    3.40
  -8  -4   9   12.20    6.00
   8   4  -9   12.30    4.50
   8   4  -9   11.90    5.00
  -8  -4  10  289.20   29.80
  -8  -4  10  287.90   31.30
   8   4 -10  268.10   29.20
   8   4 -10  258.70   27.70
  -8  -4  11   98.00   12.10
  -8  -4  11   93.40   14.30
   8   4 -11   85.70   12.10
   8   4 -11   83.60   11.20
  -8  -4  12  120.50   14.40
  -8  -4  12  128.00   17.60
   8   4 -12  119.50   15.90
  -8  -4  13  107.40   13.10
  -8  -4  13  117.40   17.30
   8   4 -13  107.80   14.70
  -8  -4  14   13.70    4.10
  -8  -4  14   11.30    7.70
   8   4 -14    7.50    5.10
  -8  -4  15   51.10   10.20
   8   4 -15   60.10   11.20
  -8  -3   1   89.30   10.90
  -8  -3   1   77.40    9.50
  -8  -3   1   75.10    2.50
   8   3  -1   88.00   10.80
   8   3  -1   92.90   10.60
   8   3  -1   87.30    2.90
  -8  -3   2  660.60   65.20
  -8  -3   2  643.80   63.60
  -8  -3   2  657.80   13.80
   8   3  -2  658.30   65.10
   8   3  -2  682.10   65.40
   8   3  -2  691.40   14.40
   8   3  -2  767.50   17.40
  -8  -3   3  138.80    4.30
   8   3  -3  118.80    2.90
   8   3  -3  118.40    3.20
  -8  -3   4  504.90   49.90
   8   3  -4  506.00   50.60
   8   3  -4  514.90   10.90
  -8  -3   5   67.20    9.40
   8   3  -5   73.50   10.20
  -8  -3   6  569.30   55.10
  -8  -3   6  534.80   53.00
   8   3  -6  510.00   52.20
   8   3  -6  548.60   53.10
  -8  -3   7  282.50   29.40
  -8  -3   7  288.40   30.00
   8   3  -7  292.20   30.50
   8   3  -7  263.60   27.80
  -8  -3   8   21.30    4.70
  -8  -3   8   25.40    7.30
   8   3  -8   23.60    5.90
   8   3  -8   20.70    5.30
  -8  -3   9  318.90   32.40
  -8  -3   9  308.70   33.00
   8   3  -9  296.00   31.80
   8   3  -9  298.60   30.70
  -8  -3  10   44.40    7.30
  -8  -3  10   34.70    8.00
   8   3 -10   40.70    7.60
   8   3 -10   34.30    6.80
  -8  -3  11  158.30   17.50
  -8  -3  11  163.30   19.90
   8   3 -11  137.20   17.30
   8   3 -11  140.00   15.90
  -8  -3  12   81.90   10.40
   8   3 -12   65.00    9.20
  -8  -3  13   93.80   15.00
   8   3 -13   97.10   13.70
  -8  -3  14   61.90    8.70
  -8  -3  14   74.30   13.70
   8   3 -14   62.90   10.20
  -8  -3  15    1.20    3.00
  -8  -3  15   -3.40    5.30
   8   3 -15   -1.30    4.20
  -8  -3  16   39.70    8.40
   8   3 -16   51.00    9.80
  -8  -2   1  231.40   24.20
  -8  -2   1  227.20   23.50
  -8  -2   1  255.80    6.70
   8   2  -1  236.60   24.80
   8   2  -1  246.90   24.50
   8   2  -1  250.10    6.60
  -8  -2   2    0.10    2.20
  -8  -2   2    1.70    2.80
  -8  -2   2    1.20    0.60
   8   2  -2    1.80    2.40
   8   2  -2   -0.50    2.80
   8   2  -2    0.30    0.50
   8   2  -2    0.00    0.60
  -8  -2   3  696.70   15.60
   8   2  -3  681.40   64.60
   8   2  -3  633.60   12.90
   8   2  -3  667.00   14.50
  -8  -2   4   91.20   11.40
  -8  -2   4  119.20    7.70
   8   2  -4   93.60   11.90
   8   2  -4   88.90    2.50
  -8  -2   5  394.10   39.70
  -8  -2   5  382.30   12.80
   8   2  -5  397.60   40.60
   8   2  -5  416.80    9.30
   8   2  -5  396.20    8.90
  -8  -2   6   44.30    7.00
  -8  -2   6   46.60    8.00
  -8  -2   6   45.10    1.90
   8   2  -6   47.80    8.00
   8   2  -6   55.00    7.70
   8   2  -6   55.20    1.60
   8   2  -6   57.10    1.90
  -8  -2   7  265.10   27.20
  -8  -2   7  259.70   27.40
   8   2  -7  241.30   26.50
   8   2  -7  242.90   25.20
  -8  -2   8  288.20   29.10
  -8  -2   8  278.80   29.50
   8   2  -8  250.30   27.70
   8   2  -8  269.60   27.40
  -8  -2   9    6.60    3.30
  -8  -2   9    9.60    5.10
   8   2 -10  272.70   29.40
  -8  -2  11   35.70    6.20
  -8  -2  11   42.90    9.30
   8   2 -11   43.00    7.80
   8   2 -11   42.50    6.90
  -8  -2  12  105.90   12.50
  -8  -2  12  101.60   14.80
   8   2 -12   96.20   13.10
   8   2 -12   96.50   11.70
  -8  -2  13   86.30   10.90
  -8  -2  13   97.00   15.00
   8   2 -13   79.30   12.10
  -8  -2  14   32.10    5.80
  -8  -2  14   29.10    9.00
   8   2 -14   33.70    7.80
  -8  -2  15   94.60   11.20
  -8  -2  15   87.00   15.20
   8   2 -15   83.90   14.80
  -8  -2  16   -4.10    5.10
   8   2 -16    1.10    4.50
  -8  -1   1  126.30   13.90
  -8  -1   1  132.20   14.00
  -8  -1   1  135.80    4.30
   8   1  -1  122.30   14.30
   8   1  -1  135.20   13.90
   8   1  -1  123.10    4.00
  -8  -1   2  376.20   38.70
  -8  -1   2  423.70   41.50
  -8  -1   2  424.50   10.00
   8   1  -2  429.30   42.90
   8   1  -2  423.10   40.90
   8   1  -2  457.40   10.50
   8   1  -2  427.90   10.20
  -8  -1   3  135.30   14.80
  -8  -1   3  149.30   15.80
  -8  -1   3  129.70    4.00
   8   1  -3  144.80   16.60
   8   1  -3  131.30   14.10
  -8  -1   4 1004.10   95.90
  -8  -1   4 1058.30   24.40
   8   1  -4  949.30   94.30
   8   1  -4 1014.50   21.10
   8   1  -4  981.00   20.60
  -8  -1   5  110.60   13.40
  -8  -1   5  105.40   11.50
   8   1  -5  128.20   15.40
   8   1  -5  123.10    3.70
   8   1  -5  107.90    3.40
  -8  -1   6  109.40   13.50
  -8  -1   6  106.50    7.10
   8   1  -6   95.50   13.00
   8   1  -6  113.60   12.90
   8   1  -6  112.10    3.30
   8   1  -6  112.70    3.50
  -8  -1   7  180.50   19.70
  -8  -1   7  195.00   21.30
  -8  -1   7  177.10    5.80
   8   1  -7  179.90   20.80
   8   1  -7  195.50   20.10
   8   1  -7  188.90    4.60
   8   1  -7  190.00    5.10
  -8  -1   8   97.40   11.90
  -8  -1   8   99.50   13.20
  -8  -1   8  103.10    3.50
   8   1  -8  108.80   14.00
   8   1  -8  111.30   12.40
   8   1  -8  101.10    2.80
  -8  -1   9  470.60   47.00
   8   1  -9  456.00   45.50
   8   1  -9  471.10   10.30
   8   1  -9  514.40   11.90
  -8  -1  10   32.70    6.00
  -8  -1  10   39.80    8.70
   8   1 -10   34.50    6.80
   8   1 -10   33.30    5.90
   8   1 -10   35.10    1.50
   8   1 -10   33.10    1.50
  -8  -1  11  190.10   20.30
  -8  -1  11  184.50   22.00
   8   1 -11  173.10   20.40
   8   1 -11  187.80   19.60
  -8  -1  12   25.30    5.20
  -8  -1  12   21.00    7.50
   8   1 -12   14.30    4.60
   8   1 -12   21.50    4.80
  -8  -1  13  102.60   12.10
  -8  -1  13   97.40   15.00
   8   1 -13   91.40   12.70
  -8  -1  14   55.00    8.10
  -8  -1  14   61.80   11.60
   8   1 -14   52.10    9.50
  -8  -1  15   14.80    4.10
   8   1 -15    9.60    5.10
  -8  -1  16   75.70   13.30
   8   1 -16   97.10   13.90
  -8   0   1  649.20   62.40
  -8   0   1  652.30   62.30
  -8   0   1  639.30   14.40
   8   0  -1  664.70   64.30
   8   0  -1  660.60   62.20
   8   0  -1  665.70   15.40
  -8   0   2   60.50    7.60
  -8   0   2   60.50    7.90
   8   0  -2   67.60    2.90
  -8   0   3  311.60   31.20
  -8   0   3  323.30   32.00
  -8   0   3  321.00    8.20
   8   0  -3  310.20   32.60
   8   0  -3  322.40   31.20
   8   0  -3  316.50    7.40
   8   0  -3  323.30    8.30
  -8   0   4   76.40    9.40
  -8   0   4   85.10   11.40
  -8   0   4   80.30    3.60
   8   0  -4   79.60    9.30
  -8   0   5  406.80   40.60
   8   0  -5  413.70   42.10
  -8   0   6  102.90   12.80
   8   0  -6  104.70   13.60
   8   0  -6  105.80    3.60
   8   0  -6  104.10    3.60
  -8   0   7  103.50   12.60
  -8   0   7  112.20   13.90
  -8   0   7  114.50    7.70
   8   0  -7  113.80   14.70
   8   0  -7  121.60   13.30
   8   0  -7  131.40    4.00
   8   0  -7  126.10    4.10
  -8   0   8  182.10   19.40
  -8   0   8  176.30   19.90
  -8   0   8  190.40    7.20
   8   0  -8  167.80   20.00
   8   0  -8  191.90   19.30
   8   0  -8  167.20    4.30
   8   0  -8  182.70    5.30
  -8   0   9   27.60    5.00
  -8   0   9   38.10    2.50
   8   0  -9   34.50    5.60
   8   0  -9   39.20    1.80
   8   0  -9   36.10    2.00
  -8   0  10  216.00   23.00
  -8   0  10  253.80   27.10
  -8   0  10  226.90    6.60
   8   0 -10  238.90   26.20
   8   0 -10  218.80   22.50
   8   0 -10  212.20    5.40
   8   0 -10  227.40    6.30
  -8   0  11   11.80    3.50
  -8   0  11   11.60    6.00
   8   0 -11   10.10    4.40
   8   0 -11   18.40    4.50
   8   0 -11   12.40    1.20
   8   0 -11   14.30    1.50
  -8   0  12  105.70   12.30
  -8   0  12   99.00   14.30
   8   0 -12   96.00   13.00
   8   0 -12   96.00   11.10
   8   0 -12   97.20    3.40
   8   0 -12   99.90    3.60
  -8   0  13   13.00    4.10
  -8   0  13   17.20    7.00
   8   0 -13   19.70    5.60
   8   0 -13   12.20    3.90
   8   0 -13   11.10    1.40
   8   0 -13   14.20    1.50
  -8   0  14   67.40    8.90
  -8   0  14   53.40   10.70
   8   0 -14   51.10    9.40
   8   0 -14   45.90    2.30
  -8   0  15   67.20    9.00
  -8   0  15   55.40   11.70
   8   0 -15   53.30    9.40
  -8   0  16   13.50    7.40
   8   0 -16   14.30    6.20
  -8   0  17   83.60   13.90
   8   0 -17  154.40   18.30
  -8   1   1  499.10   49.40
  -8   1   1  557.30   52.80
  -8   1   1  539.10   12.80
   8  -1  -1  544.70   53.10
   8  -1  -1  551.90   51.50
   8  -1  -1  534.40   12.80
  -8   1   2  566.60   56.20
  -8   1   2  612.30   58.70
  -8   1   2  611.00   14.10
   8  -1  -2  610.10   59.80
   8  -1  -2  631.30   58.80
   8  -1  -2  652.20   14.70
   8  -1  -2  590.50   13.60
  -8   1   3   15.80    3.40
  -8   1   3   18.40    4.30
  -8   1   3   14.90    1.40
   8  -1  -3   18.20    4.40
   8  -1  -3   21.80    3.90
   8  -1  -3   19.20    1.30
   8  -1  -3   21.10    1.70
  -8   1   4  369.90   36.70
  -8   1   4  399.10   10.50
   8  -1  -4  406.50   38.00
   8  -1  -4  355.70    8.00
   8  -1  -4  392.40    9.90
  -8   1   5   96.10   11.10
  -8   1   5   84.40   10.70
   8  -1  -5  103.50   12.90
   8  -1  -5  103.30    3.50
   8  -1  -5   90.10    3.40
  -8   1   6  308.40   30.90
   8  -1  -6  270.20   29.40
   8  -1  -6  286.40    7.60
  -8   1   7  150.20   17.10
   8  -1  -7  145.30   17.20
   8  -1  -7  142.30    4.60
  -8   1   8   75.60    9.30
  -8   1   8   74.60   10.50
   8  -1  -8   72.90   10.60
   8  -1  -8   72.00    8.70
   8  -1  -8   73.10    3.10
  -8   1   9  285.00   28.60
   8  -1  -9  282.70   27.70
   8  -1  -9  270.60    7.40
  -8   1  10    4.40    2.70
  -8   1  10    7.40    4.60
   8  -1 -10    2.80    3.00
   8  -1 -10    7.00    3.40
   8  -1 -10    7.00    1.30
  -8   1  11  252.30   26.00
  -8   1  11  253.90   28.00
   8  -1 -11  256.20    7.30
   8  -1 -12    1.50    3.10
   8  -1 -12    0.10    2.80
   8  -1 -12    0.10    0.80
   8  -1 -12    0.40    1.00
  -8   1  13  113.40   13.40
  -8   1  13  115.40   16.20
   8  -1 -13  111.90   15.10
   8  -1 -13  112.90   12.30
   8  -1 -13  116.10    4.20
   8  -1 -13  112.30    4.40
  -8   1  14   69.80    9.70
  -8   1  14   60.00   11.60
   8  -1 -14   57.70    9.90
   8  -1 -14   68.90    3.50
   8  -1 -14   68.70    3.40
  -8   1  15   52.30    7.80
  -8   1  15   42.40   10.10
   8  -1 -15   39.80    8.50
   8  -1 -15   41.90    2.90
  -8   1  16   85.40   11.60
  -8   1  16   79.10   13.70
   8  -1 -16   86.40   12.60
  -8   1  17    6.40    6.60
   8  -1 -17    4.90    4.30
  -8   2   1  108.40   11.50
  -8   2   1  108.00   12.20
  -8   2   1  106.00    3.90
   8  -2  -1  120.20   13.70
   8  -2  -1  121.00   11.70
  -8   2   2  597.80   58.10
  -8   2   2  619.00   59.90
  -8   2   2  612.70   14.20
   8  -2  -2  664.70   63.30
   8  -2  -2  622.80   58.60
   8  -2  -2  637.80   14.20
  -8   2   3  871.60   83.10
  -8   2   3  860.20   83.20
  -8   2   3  890.10   19.90
   8  -2  -3  922.10   87.60
   8  -2  -3  870.60   82.30
   8  -2  -3  887.60   19.00
  -8   2   4   27.00    2.00
   8  -2  -4   37.80    7.00
   8  -2  -4   29.10    4.40
   8  -2  -4   36.20    1.90
   8  -2  -4   31.40    2.10
  -8   2   5  286.80   28.40
  -8   2   5  280.10   29.00
  -8   2   5  270.70    8.80
   8  -2  -5  255.00   28.00
   8  -2  -5  297.40   28.30
   8  -2  -5  305.40    7.70
   8  -2  -5  286.90    7.90
  -8   2   6   80.30   10.90
  -8   2   6   90.90    8.90
   8  -2  -6   94.00   12.30
   8  -2  -6   98.00    3.50
   8  -2  -6   85.00    3.50
  -8   2   7  272.80   27.60
   8  -2  -7  248.10   26.80
   8  -2  -7  231.10    6.50
   8  -2  -7  246.10    7.10
  -8   2   8  158.90   17.00
  -8   2   8  157.80   18.10
  -8   2   8  175.50   14.10
   8  -2  -8  157.20   18.40
   8  -2  -8  155.40    5.00
   8  -2  -8  147.50    5.00
  -8   2   9  105.50   12.00
  -8   2   9   92.30    7.10
   8  -2  -9  106.10   11.40
   8  -2  -9  102.80    3.60
   8  -2  -9  109.60    4.30
  -8   2  10  242.00   25.20
  -8   2  10  250.80   27.20
  -8   2  10  253.20   10.00
   8  -2 -10  255.90   27.90
   8  -2 -10  260.30   25.30
   8  -2 -10  256.50    6.80
   8  -2 -10  245.50    7.30
  -8   2  11   28.10    5.30
  -8   2  11   26.40    7.30
  -8   2  11   25.60    2.80
   8  -2 -11   19.60    5.40
   8  -2 -11   24.00    4.50
   8  -2 -11   24.80    1.80
  -8   2  12  253.50   26.50
  -8   2  12  267.30   29.40
  -8   2  12  257.20    8.60
   8  -2 -12  274.50   29.70
   8  -2 -12  266.60   25.90
   8  -2 -12  258.00    6.90
  -8   2  13    0.10    2.30
  -8   2  13    0.50    5.10
  -8   2  13    1.40    1.50
   8  -2 -13    4.40    4.10
   8  -2 -13    3.90    3.20
   8  -2 -13    3.00    1.10
   8  -2 -13    3.50    1.50
  -8   2  14  115.90   14.30
  -8   2  14  126.50   17.40
   8  -2 -14  111.90   15.40
   8  -2 -14  133.20    4.80
   8  -2 -14  136.70    5.40
  -8   2  15   49.70    7.60
  -8   2  15   48.70   10.50
   8  -2 -15   40.60    8.40
   8  -2 -15   40.70    2.80
   8  -2 -15   43.20    3.20
  -8   2  16   19.00    4.90
  -8   2  16   33.60    8.70
   8  -2 -16   27.90    7.00
   8  -2 -16   22.50    2.60
   8  -2 -16   18.80    2.50
  -8   2  17   56.60   10.70
   8  -2 -17   72.70   11.20
  -8   3   1   83.80    9.40
  -8   3   1  101.50   11.10
  -8   3   1  111.80    4.40
   8  -3  -1   84.80   10.90
   8  -3  -1  103.00    9.80
   8  -3  -1   80.90    2.90
   8  -3  -1   94.30    3.90
  -8   3   2  186.40   19.20
  -8   3   2  190.20   19.90
  -8   3   2  193.50    6.00
   8  -3  -2  202.40   21.70
   8  -3  -2  207.40   19.30
   8  -3  -2  206.90    5.70
   8  -3  -2  190.70    6.00
  -8   3   3  351.80   33.80
  -8   3   3  333.80   33.30
  -8   3   3  333.10    8.90
   8  -3  -3  357.40   35.90
   8  -3  -3  356.60   32.90
   8  -3  -3  328.50    7.90
   8  -3  -3  325.60    8.70
  -8   3   4  839.40   78.40
  -8   3   4  779.20   75.80
  -8   3   4  793.90   18.30
   8  -3  -4  861.10   81.30
   8  -3  -4  804.20   75.40
   8  -3  -4  817.40   17.80
   8  -3  -4  775.30   17.50
  -8   3   5   24.60    4.30
  -8   3   5   19.90    5.20
  -8   3   5   22.30    2.40
   8  -3  -5   20.10    4.90
   8  -3  -5   24.70    3.90
   8  -3  -5   22.60    1.50
   8  -3  -5   22.20    1.90
  -8   3   6  277.40   28.10
  -8   3   6  278.60   29.10
  -8   3   6  275.10   11.60
   8  -3  -6  289.90   30.50
   8  -3  -6  302.80   28.60
   8  -3  -6  291.70    7.50
   8  -3  -6  285.80    8.00
  -8   3   7   41.30    7.40
  -8   3   7   19.00    8.60
   8  -3  -7   44.30    7.60
   8  -3  -7   57.50    2.80
   8  -3  -7   48.20    2.70
  -8   3   8  105.20   13.80
  -8   3   8  106.70   15.50
   8  -3  -8  124.00   15.40
   8  -3  -8  134.70    4.90
   8  -3  -8  124.00    4.70
  -8   3   9  131.30   14.50
   8  -3  -9  133.40   13.50
   8  -3  -9  119.30    4.20
   8  -3  -9  126.60    4.80
  -8   3  10  102.50   12.20
  -8   3  10   98.30   13.40
  -8   3  10  110.40    8.00
   8  -3 -10   93.60   12.90
   8  -3 -10   97.90   10.50
   8  -3 -10  110.00    3.90
   8  -3 -10  105.50    4.40
  -8   3  11  156.10   17.50
  -8   3  11  160.00   19.20
   8  -3 -11  153.40   18.80
   8  -3 -11  163.30   16.40
   8  -3 -11  176.40    5.40
   8  -3 -11  166.70    5.90
  -8   3  12    6.90    3.20
  -8   3  12    8.00    5.50
  -8   3  12   12.40    2.30
   8  -3 -12   12.90    4.90
   8  -3 -12   11.30    3.50
   8  -3 -12    7.80    1.30
   8  -3 -12    7.80    1.70
  -8   3  13  162.30   17.60
  -8   3  13  154.60   19.30
  -8   3  13  127.40    5.80
   8  -3 -13  129.00   17.00
   8  -3 -13  144.30   14.60
   8  -3 -13  146.90    4.90
   8  -3 -13  141.40    5.60
  -8   3  14   59.90    8.30
  -8   3  14   44.90    9.40
   8  -3 -14   59.40    9.70
   8  -3 -14   52.90    2.90
   8  -3 -14   51.40    3.30
  -8   3  15   60.40    8.30
  -8   3  15   54.00   11.00
   8  -3 -15   44.50    8.50
   8  -3 -15   52.70    3.00
   8  -3 -15   49.90    3.50
  -8   3  16   88.30   10.90
  -8   3  16   74.20   13.20
   8  -3 -16   89.10   13.00
   8  -3 -16   80.80    4.10
   8  -3 -16   80.30    4.60
  -8   3  17    5.50    6.20
   8  -3 -17    9.50    5.20
  -8   4   1  162.80   16.50
  -8   4   1  163.50   16.90
  -8   4   1  154.30    5.30
   8  -4  -1  158.10   17.40
   8  -4  -1  156.50   14.60
   8  -4  -1  162.80    4.80
   8  -4  -1  151.20    5.30
  -8   4   2  322.00   31.60
  -8   4   2  327.80   32.30
  -8   4   2  322.50    8.80
   8  -4  -2  321.20   32.80
   8  -4  -2  338.70   31.00
   8  -4  -2  318.40    7.90
   8  -4  -2  317.90    8.80
  -8   4   3  236.70    7.00
   8  -4  -3  234.20   22.40
   8  -4  -3  279.40    7.50
   8  -4  -3  232.10    6.90
  -8   4   4  149.30   16.20
  -8   4   4  158.50   17.20
  -8   4   4  172.90    6.10
   8  -4  -4  147.30   17.20
   8  -4  -4  155.60   15.00
  -8   4   5  311.60   31.70
  -8   4   5  318.40   32.40
  -8   4   5  324.20    9.90
   8  -4  -5  350.60   35.20
   8  -4  -5  341.60   31.70
   8  -4  -5  326.40    8.10
   8  -4  -5  332.40    9.20
  -8   4   6   16.00    3.90
  -8   4   6   14.10    4.70
  -8   4   6   12.00    2.70
   8  -4  -6   15.80    4.60
   8  -4  -6   13.80    3.10
   8  -4  -6   12.80    1.30
   8  -4  -6   12.60    1.60
  -8   4   7  312.70   31.90
  -8   4   7  333.20   33.60
  -8   4   7  344.60   20.60
   8  -4  -7  294.90   32.30
   8  -4  -7  337.70   31.60
   8  -4  -7  331.50    8.80
   8  -4  -7  328.50    9.20
  -8   4   8   26.40    6.10
  -8   4   8   15.50   10.20
   8  -4  -8   40.90    7.30
   8  -4  -8   41.40    2.60
   8  -4  -8   32.00    2.30
  -8   4   9  136.80   16.20
  -8   4   9  117.60   15.30
   8  -4  -9  110.80   14.70
   8  -4  -9  124.60    4.80
   8  -4  -9  132.00    5.10
  -8   4  10  103.20   12.60
  -8   4  10  115.90   14.70
  -8   4  10  138.20   12.10
   8  -4 -10  108.30   14.20
   8  -4 -10  113.80   11.50
   8  -4 -10  108.10    4.10
   8  -4 -10  109.90    4.60
  -8   4  11   56.80    8.10
  -8   4  11   50.20    9.20
  -8   4  11   59.30    6.40
   8  -4 -11   50.20    8.70
   8  -4 -11   52.70    6.10
   8  -4 -11   53.80    2.70
   8  -4 -11   55.30    3.30
  -8   4  12  270.10   27.10
  -8   4  12  278.50   29.70
   8  -4 -12  236.20   26.80
   8  -4 -12  245.70   23.70
   8  -4 -12  237.30    7.50
  -8   4  13   23.70    5.20
  -8   4  13   25.10    7.50
   8  -4 -13   19.80    2.30
  -8   4  14   82.30   10.40
  -8   4  14   74.40   12.60
  -8   4  14   80.00    4.90
   8  -4 -14   74.60   11.20
   8  -4 -14   76.50    3.50
   8  -4 -14   68.10    4.00
  -8   4  15   45.00    7.00
  -8   4  15   39.20    9.50
  -8   4  15   36.60    3.50
   8  -4 -15   42.30    8.40
   8  -4 -15   41.70    2.70
   8  -4 -15   37.90    3.10
  -8   4  16   74.80    9.80
  -8   4  16   67.50   12.50
   8  -4 -16   57.80   10.00
   8  -4 -16   72.00    3.80
   8  -4 -16   68.80    4.30
  -8   4  17  128.90   17.90
   8  -4 -17  119.80   15.90
  -8   5   1  486.30   46.80
  -8   5   1  485.60   47.00
  -8   5   1  475.20   12.00
   8  -5  -1  498.70   48.70
   8  -5  -1  500.20   45.70
   8  -5  -1  516.50   12.30
   8  -5  -1  465.10   11.80
  -8   5   2   74.00    8.60
  -8   5   2   68.80    8.80
   8  -5  -2   80.20   10.40
   8  -5  -2   76.80    7.20
   8  -5  -2   71.00    3.50
  -8   5   3  422.00   41.10
   8  -5  -3  419.40   39.10
   8  -5  -4   97.60   12.20
   8  -5  -4  104.00    9.90
   8  -5  -4   98.20    4.20
  -8   5   5   70.70    9.40
  -8   5   5   71.80    4.10
   8  -5  -5   74.30   10.30
   8  -5  -5   57.00    2.50
   8  -5  -5   66.70    3.40
  -8   5   6  191.50   20.30
  -8   5   6  205.10   21.70
  -8   5   6  204.70    8.80
   8  -5  -6  199.30   22.00
   8  -5  -6  207.20   19.50
   8  -5  -6  200.80    5.80
   8  -5  -6  201.00    6.50
  -8   5   7   23.80    4.80
  -8   5   7   20.40    5.70
  -8   5   7   23.00    6.70
   8  -5  -7   17.50    4.80
   8  -5  -7   20.30    3.20
   8  -5  -7   19.40    2.00
  -8   5   8  319.30   32.50
  -8   5   8  333.80   34.20
   8  -5  -8  323.70   34.20
   8  -5  -8  342.80   31.90
   8  -5  -8  331.20    9.40
  -8   5   9  117.90   14.80
   8  -5  -9  127.40   15.60
   8  -5  -9  133.50    5.20
  -8   5  10  144.90   17.10
  -8   5  10  151.50   15.60
   8  -5 -10  139.70   16.90
   8  -5 -10  130.40    4.90
   8  -5 -10  130.60    5.20
  -8   5  11  209.50   21.80
  -8   5  11  201.30   22.90
  -8   5  11  227.80   13.90
   8  -5 -11  204.40   23.20
   8  -5 -11  202.10   19.50
   8  -5 -11  193.30    6.00
   8  -5 -11  199.90    6.90
  -8   5  12   11.90    3.70
  -8   5  12    9.70    5.40
  -8   5  12   11.00    3.80
   8  -5 -12   16.70    5.10
   8  -5 -12   12.90    3.00
   8  -5 -12   12.10    1.60
   8  -5 -12   13.70    2.00
  -8   5  13  209.70   22.10
  -8   5  13  198.50   23.60
  -8   5  13  196.80    9.30
   8  -5 -13  206.90   23.80
   8  -5 -13  210.60    6.40
  -8   5  14   22.70    5.20
  -8   5  14   20.00    7.30
  -8   5  14   12.00    2.60
   8  -5 -14   20.30    5.80
   8  -5 -14   17.70    1.90
   8  -5 -14   12.80    2.30
  -8   5  15   77.00   10.00
  -8   5  15   81.10   13.30
  -8   5  15   71.10    4.70
   8  -5 -15   89.10   12.40
   8  -5 -15   76.70    3.60
   8  -5 -15   56.50    3.80
  -8   5  16   22.90    7.90
   8  -5 -16   20.10    5.80
   8  -5 -16   21.10    2.20
   8  -5 -16   16.90    2.50
  -8   5  17   68.00   12.20
   8  -5 -17   55.70    9.80
   8  -5 -17   66.30    3.90
   8  -5 -17   48.10    4.00
  -8   6   1    3.80    2.60
  -8   6   1    6.20    3.80
  -8   6   1    6.10    1.30
   8  -6  -1    5.60    3.10
   8  -6  -1    8.00    2.00
   8  -6  -1    6.20    1.00
  -8   6   2  397.60   38.00
  -8   6   2  385.50   10.70
   8  -6  -2  392.40   35.40
   8  -6  -2  353.90    8.50
   8  -6  -2  360.40    9.90
  -8   6   3  286.90   28.00
  -8   6   3  279.70   27.90
  -8   6   3  276.90    8.40
   8  -6  -3  275.30   28.20
   8  -6  -3  266.60   24.70
   8  -6  -3  267.80    7.20
   8  -6  -3  243.40    7.30
  -8   6   4  108.50   12.50
  -8   6   4  127.30   14.20
  -8   6   4  107.10    4.70
   8  -6  -4  114.10   14.10
   8  -6  -4  111.00   10.50
   8  -6  -4  116.20    4.00
   8  -6  -4  125.90    5.10
  -8   6   5  133.20   14.90
  -8   6   5  136.70   15.50
  -8   6   5  128.60    5.60
   8  -6  -5  136.90   16.20
   8  -6  -5  138.30   13.00
   8  -6  -5  153.50    4.90
   8  -6  -5  142.50    5.40
  -8   6   6   21.80    4.40
  -8   6   6   20.20    5.40
  -8   6   6   21.00    2.90
   8  -6  -6   22.80    5.70
   8  -6  -6   18.10    2.80
   8  -6  -6   18.20    1.60
   8  -6  -6   22.30    2.10
  -8   6   7  356.20   35.20
  -8   6   7  343.10   35.20
  -8   6   7  376.90   17.20
   8  -6  -7  338.90   35.70
   8  -6  -7  356.00   33.10
   8  -6  -7  353.90    9.20
   8  -6  -7  346.80    9.80
  -8   6   8   43.60    6.60
  -8   6   8   36.70   10.10
   8  -6  -8   42.40    4.90
   8  -6  -8   37.90    2.50
   8  -6  -8   37.90    2.70
  -8   6   9  242.60   25.40
  -8   6   9  259.20   27.10
   8  -6  -9  231.80   25.90
   8  -6  -9  245.10   23.30
   8  -6  -9  252.20    7.70
   8  -6  -9  245.90    7.80
  -8   6  10  107.30   13.80
  -8   6  10   99.20   15.70
   8  -6 -10  103.80   13.70
   8  -6 -10  122.50    5.00
  -8   6  11   92.00   11.30
  -8   6  11  108.30   13.90
  -8   6  11  124.20   14.30
   8  -6 -11   90.30   12.40
   8  -6 -11   92.90    9.40
   8  -6 -11   94.30    4.10
   8  -6 -11   78.00    4.50
  -8   6  12  162.70   17.50
  -8   6  12  172.00   11.50
   8  -6 -12  150.30   19.10
   8  -6 -12  150.40   14.60
   8  -6 -12  149.50    5.20
   8  -6 -12  142.30    5.80
  -8   6  13    3.30    2.90
  -8   6  13    4.00    5.30
  -8   6  13    3.30    2.70
   8  -6 -13    3.50    3.60
   8  -6 -13    0.00    1.20
  -8   6  14  242.00   25.40
  -8   6  14  246.80   28.00
  -8   6  15   14.60    2.80
   8  -6 -15   19.90    7.00
   8  -6 -15   18.50    1.90
   8  -6 -15   15.70    2.40
  -8   6  16   73.50   12.80
   8  -6 -16   69.30   10.50
   8  -6 -16   55.30    4.00
  -8   6  17   21.80    8.00
  -8   6  17   16.60    2.90
   8  -6 -17   21.50    6.10
   8  -6 -17   22.00    2.40
   8  -6 -17   15.80    2.60
  -8   7   1  253.70   25.20
  -8   7   1  230.00    7.20
   8  -7  -1  243.50   25.20
   8  -7  -1  252.10   22.40
   8  -7  -1  241.10    6.60
   8  -7  -1  220.40    7.10
  -8   7   2   21.50    2.10
   8  -7  -2   23.00    4.80
   8  -7  -2   24.70    2.50
   8  -7  -2   30.60    1.90
   8  -7  -2   22.10    2.10
  -8   7   3  166.00   17.80
  -8   7   3  182.00   18.80
  -8   7   3  175.10    6.30
   8  -7  -3  159.80   18.00
   8  -7  -3  178.90   15.90
   8  -7  -3  155.80    4.80
   8  -7  -3  161.80    5.80
  -8   7   4   69.70    9.50
  -8   7   4   80.50   10.20
  -8   7   4   86.40    4.30
   8  -7  -4   84.80   10.80
   8  -7  -4   84.40    7.90
   8  -7  -4   77.70    3.20
   8  -7  -4   70.70    3.60
  -8   7   5   47.20    7.10
  -8   7   5   62.10    8.80
  -8   7   5   59.90    3.90
   8  -7  -5   58.40    8.50
   8  -7  -5   63.70    6.00
   8  -7  -5   54.40    2.60
   8  -7  -5   59.20    3.40
  -8   7   6  356.70   35.50
  -8   7   6  360.30   35.80
  -8   7   6  370.50   12.70
   8  -7  -6  373.90   37.40
   8  -7  -6  351.80   32.60
   8  -7  -6  332.50    8.40
   8  -7  -6  354.20   10.10
  -8   7   7    7.00    3.30
  -8   7   7    6.30    3.80
  -8   7   7    9.60    3.60
   8  -7  -7    8.30    4.00
   8  -7  -7    9.90    2.30
   8  -7  -7    7.40    1.30
   8  -7  -7    8.90    1.70
  -8   7   8  400.40   39.80
  -8   7   8  391.30   39.90
   8  -7  -8  416.10   42.00
   8  -7  -8  396.70   37.10
   8  -7  -8  415.10   11.00
   8  -7  -8  393.20   10.90
  -8   7   9   44.40    7.90
  -8   7   9   63.80   17.40
   8  -7  -9   52.70    8.80
   8  -7  -9   57.00    3.30
   8  -7  -9   51.30    3.30
  -8   7  10  203.60   22.30
  -8   7  10  156.10   21.50
   8  -7 -10  175.40   20.40
   8  -7 -10  178.90    6.40
   8  -7 -10  170.80    6.40
  -8   7  11  115.80   14.80
  -8   7  11  124.40   15.70
   8  -7 -11   98.30   13.30
   8  -7 -11  117.10    4.90
   8  -7 -11  107.30    4.90
  -8   7  12    4.80    3.10
  -8   7  12    8.80    5.30
  -8   7  12   13.80    6.00
   8  -7 -12   10.80    4.50
   8  -7 -12    6.30    1.60
   8  -7 -12    7.60    1.70
  -8   7  13   60.10   10.60
  -8   7  13   57.50    6.90
   8  -7 -13   56.70    9.30
   8  -7 -13   76.10    3.60
   8  -7 -13   62.10    3.90
  -8   7  14   12.20    4.30
  -8   7  14    9.00    5.70
   8  -7 -14   10.00    4.40
   8  -7 -14    8.70    1.90
  -8   7  15  137.60   16.00
  -8   7  15  133.10   18.30
  -8   7  15  143.00    7.80
   8  -7 -15  139.30   17.60
  -8   7  16   16.30    7.20
  -8   7  16   13.10    2.90
   8  -7 -16   17.10    5.30
   8  -7 -16   14.40    1.80
   8  -7 -17   46.40    3.10
   8  -7 -17   36.30    3.50
  -8   8   1   13.00    4.30
  -8   8   1   11.40    1.60
   8  -8  -1   11.50    3.70
   8  -8  -1    9.20    1.80
   8  -8  -1    9.10    1.10
   8  -8  -1   14.60    1.90
  -8   8   2  221.70   22.90
  -8   8   2  227.10    7.40
   8  -8  -2  246.60   25.20
   8  -8  -2  230.80   20.90
   8  -8  -2  229.10    6.40
   8  -8  -2  214.40    7.00
  -8   8   3   41.80    6.70
  -8   8   3   34.30    2.60
   8  -8  -3   52.40    7.80
   8  -8  -3   49.70    2.50
   8  -8  -3   41.90    2.80
  -8   8   4   92.50   11.10
  -8   8   4  104.50    5.00
   8  -8  -4   89.60   11.30
   8  -8  -4   93.50    8.40
   8  -8  -4   78.30    3.20
   8  -8  -4   83.20    4.00
  -8   8   5  132.00   15.20
  -8   8   5  143.00    6.40
   8  -8  -5  143.70   16.40
   8  -8  -5  146.00   13.30
  -8   8   6   61.10    8.90
  -8   8   6   64.80    9.00
  -8   8   6   45.80    4.20
   8  -8  -6   59.30    8.60
   8  -8  -6   55.00    5.30
   8  -8  -6   56.80    2.80
   8  -8  -6   63.00    3.60
  -8   8   7  367.90   37.20
  -8   8   7  371.50   38.00
  -8   8   7  372.80   15.80
   8  -8  -7  371.50   38.40
   8  -8  -7  369.20   34.40
   8  -8  -7  403.40   10.50
   8  -8  -7  369.00   10.60
  -8   8   8    3.00    3.00
  -8   8   8    4.60    3.80
  -8   8   8    5.20    7.40
   8  -8  -8    1.60    2.80
   8  -8  -8    4.00    2.10
   8  -8  -8    4.20    1.30
   8  -8  -8    4.20    1.50
  -8   8   9  179.30   20.10
  -8   8   9  212.60   22.70
  -8   8   9  205.40   24.60
   8  -8  -9  213.00   23.30
   8  -8  -9  204.90   18.90
   8  -8  -9  187.20    6.40
   8  -8  -9  201.80    7.10
  -8   8  10   14.80    4.70
  -8   8  10   15.20    5.20
  -8   8  10    3.50   11.80
   8  -8 -10   15.40    5.20
   8  -8 -10   14.20    2.60
   8  -8 -10   19.50    2.30
   8  -8 -10   13.20    2.00
  -8   8  11  114.60   14.80
  -8   8  11   93.80   17.70
   8  -8 -11  117.20   15.00
   8  -8 -11  118.40    5.30
  -8   8  12  114.70   15.00
   8  -8 -12   88.80   11.90
   8  -8 -12  112.20    4.90
   8  -8 -12   96.30    4.70
  -8   8  13    2.20    3.40
  -8   8  13    7.00    5.60
   8  -8 -13   -0.10    2.50
   8  -8 -13    5.00    1.40
   8  -8 -13    5.00    1.60
  -8   8  14   62.90    9.50
  -8   8  14   59.10   10.90
  -8   8  14   72.70    7.30
   8  -8 -14   65.90   10.50
   8  -8 -14   73.20    3.50
   8  -8 -14   64.20    4.60
  -8   8  15    9.10    3.80
  -8   8  15   12.80    6.60
  -8   8  15    6.80    3.20
   8  -8 -15   11.90    4.50
   8  -8 -15    7.80    1.50
   8  -8 -15    9.00    2.10
  -8   8  16   98.40    6.40
   8  -8 -16  100.80   13.50
   8  -8 -16   96.80    4.10
   8  -8 -16   94.50    5.20
  -8   8  17   11.60    3.00
   8  -8 -17   22.00    2.30
   8  -8 -17   17.70    2.80
   8  -8 -18   20.40    3.00
  -8   9   1  379.50   10.70
   8  -9  -1  404.40   40.00
   8  -9  -1  418.70   37.50
   8  -9  -1  404.20   10.20
   8  -9  -1  371.50   10.50
  -8   9   2   -0.50    3.10
  -8   9   2    0.60    1.10
   8  -9  -2    2.10    2.80
   8  -9  -2    0.60    0.80
   8  -9  -2   -0.10    1.00
  -8   9   3  296.60   29.60
   8  -9  -3  298.60   30.30
   8  -9  -3  289.80   26.40
   8  -9  -3  271.20    8.40
  -8   9   4  121.00   14.20
   8  -9  -4  141.10   16.10
   8  -9  -4  138.60   12.50
   8  -9  -4  129.50    5.30
  -8   9   5   89.60   11.00
   8  -9  -5   86.00   11.10
   8  -9  -5   82.80    7.60
   8  -9  -5   82.40    4.20
   8  -9  -6  238.00   21.70
   8  -9  -6  222.90    7.60
  -8   9   7   30.50    6.20
   8  -9  -7   36.90    6.80
   8  -9  -7   36.70    3.80
   8  -9  -7   37.70    2.90
   8  -9  -8  218.10   24.50
   8  -9  -8  251.80   23.20
   8  -9  -8  242.80    8.20
  -8   9   9    5.50    4.20
  -8   9   9   -0.80   10.90
   8  -9  -9    6.40    3.50
   8  -9  -9    3.40    2.00
   8  -9  -9    5.20    1.50
   8  -9  -9    4.70    1.50
  -8   9  10  107.00   13.50
   8  -9 -10   95.50   12.20
   8  -9 -10  100.30    9.40
   8  -9 -10   89.00    4.20
   8  -9 -10  107.40    5.10
  -8   9  11   23.20    6.70
  -8   9  11   34.00   13.90
   8  -9 -11   23.90    6.10
   8  -9 -11   19.50    2.90
   8  -9 -11   22.50    2.50
   8  -9 -11   20.00    2.40
  -8   9  12   76.50   12.00
  -8   9  12   75.90   14.10
   8  -9 -12   93.50   12.50
   8  -9 -12  100.30    4.70
  -8   9  13  146.00   18.40
  -8   9  13  170.10   14.80
   8  -9 -13  161.80   19.10
   8  -9 -13  168.00    6.00
   8  -9 -13  155.00    6.50
  -8   9  14    0.40    4.10
   8  -9 -14    0.20    1.10
  -8   9  15   93.70   14.40
   8  -9 -15   88.40   12.50
   8  -9 -15   98.30    4.10
   8  -9 -15   87.80    5.00
  -8   9  16    0.60    4.30
   8  -9 -16    1.90    3.00
   8  -9 -16   -0.20    1.40
  -8   9  17  108.30    6.70
   8  -9 -17  109.50    4.50
   8  -9 -17  101.60    5.70
  -8  10   1   83.50    4.20
   8 -10  -1   84.60   10.80
   8 -10  -1   93.70    8.60
   8 -10  -1   78.00    3.20
   8 -10  -1   78.20    4.10
  -8  10   2  286.30   29.00
  -8  10   2  281.40    8.90
   8 -10  -2  272.80   28.80
   8 -10  -2  297.20   26.90
   8 -10  -2  281.30    7.70
  -8  10   3   27.80    5.80
  -8  10   3   32.30    2.80
   8 -10  -3   30.00    5.80
   8 -10  -3   35.70    4.00
   8 -10  -3   32.70    2.10
  -8  10   4  163.80   17.90
  -8  10   4  163.10    6.80
   8 -10  -4  155.80   17.90
   8 -10  -4  158.10   14.70
   8 -10  -4  170.50    5.50
   8 -10  -4  163.70    6.40
  -8  10   5   59.20    4.20
   8 -10  -5   62.10    5.90
   8 -10  -5   62.00    2.90
   8 -10  -5   63.10    3.80
  -8  10   6   71.30    9.80
  -8  10   6   71.10    5.40
   8 -10  -6   69.90    9.80
   8 -10  -6   69.90    6.60
  -8  10   7  212.90   22.70
  -8  10   7  238.90   12.40
   8 -10  -7  223.80   24.80
   8 -10  -7  206.80    6.40
  -8  10   8   12.00    4.60
  -8  10   8    4.90    6.50
   8 -10  -8   10.30    3.80
   8 -10  -8   12.30    2.30
   8 -10  -8   11.00    1.70
  -8  10   9  122.60   14.60
  -8  10   9  113.40   19.20
   8 -10  -9  126.70   15.30
   8 -10  -9  123.90   11.40
   8 -10  -9  126.20    5.10
   8 -10  -9  106.40    5.40
  -8  10  10   36.50   17.70
   8 -10 -10   36.70    4.00
   8 -10 -10   43.10    3.20
   8 -10 -10   34.30    2.90
  -8  10  11   95.20   12.70
  -8  10  11   71.60   19.10
   8 -10 -11   93.70   12.50
   8 -10 -11   96.60    9.20
   8 -10 -11  105.10    4.90
   8 -10 -11   97.10    4.90
  -8  10  12   50.30    9.60
  -8  10  12   52.30   14.50
   8 -10 -12   54.80    9.10
   8 -10 -12   57.30    3.60
   8 -10 -12   52.10    3.60
  -8  10  13   40.90    9.20
  -8  10  13   66.70   13.30
   8 -10 -13   52.50    8.80
   8 -10 -13   56.80    3.30
   8 -10 -13   51.20    3.60
  -8  10  14  215.20   24.70
   8 -10 -14  186.50   21.60
   8 -10 -14  172.50    7.00
  -8  10  15   -0.50    5.50
  -8  10  15    3.20    3.80
   8 -10 -15    0.70    3.20
   8 -10 -15    0.50    1.00
   8 -10 -15    2.00    1.50
  -8  10  16   80.70    6.80
   8 -10 -16   77.90    3.50
   8 -10 -17   10.20    1.60
   8 -10 -17    7.10    2.10
  -8  10  18   26.50    3.90
   8 -10 -18   25.20    3.10
  -8  11   1  157.30   17.30
  -8  11   1  143.60    5.80
   8 -11  -1  148.80   17.00
   8 -11  -1  169.30   15.40
   8 -11  -1  169.70    5.50
   8 -11  -1  149.80    6.50
  -8  11   2    5.80    4.10
  -8  11   2    4.10    1.40
   8 -11  -2    9.10    3.90
   8 -11  -2    3.50    2.20
   8 -11  -2    3.90    1.00
   8 -11  -2    4.90    1.40
  -8  11   3  170.60   18.30
  -8  11   3  158.40    6.50
   8 -11  -3  174.10   19.10
   8 -11  -3  169.00   15.50
   8 -11  -3  152.70    5.00
   8 -11  -3  158.80    6.20
   8 -11  -4   53.30    8.10
   8 -11  -4   57.30    5.60
   8 -11  -4   54.00    2.80
   8 -11  -4   54.60    3.50
  -8  11   5  169.60   18.30
  -8  11   5  140.20    6.80
   8 -11  -5  157.80   17.80
   8 -11  -5  160.50   14.70
   8 -11  -5  149.00    5.00
   8 -11  -5  152.80    6.10
  -8  11   6  190.20    9.00
   8 -11  -6  197.40   21.50
   8 -11  -6  195.70   18.10
   8 -11  -6  189.70    6.00
   8 -11  -6  189.70    7.00
  -8  11   7   28.10    5.00
   8 -11  -7   24.20    5.40
   8 -11  -7   31.90    3.80
   8 -11  -7   20.80    1.90
   8 -11  -7   27.30    2.60
  -8  11   8  149.10   15.90
   8 -11  -8   97.10   13.10
   8 -11  -8   95.20    9.10
   8 -11  -8   83.40    3.90
   8 -11  -8  101.60    4.90
  -8  11   9    2.90   10.90
   8 -11  -9    8.30    2.30
   8 -11  -9   10.20    1.80
   8 -11  -9    7.10    1.70
  -8  11  10  178.20   20.70
  -8  11  10  210.20   30.70
   8 -11 -10  204.10   22.40
   8 -11 -10  196.30   18.30
   8 -11 -10  216.30    7.50
   8 -11 -10  197.40    7.30
  -8  11  11   39.30    8.20
  -8  11  11   34.40   18.80
   8 -11 -11   48.40    7.80
   8 -11 -11   53.20    5.30
   8 -11 -11   57.90    3.60
   8 -11 -11   53.30    3.70
  -8  11  12   92.90   12.80
   8 -11 -12   96.20   12.50
   8 -11 -12   99.80    9.50
   8 -11 -12  106.30    5.30
  -8  11  13   88.60   13.60
  -8  11  13   85.80   15.80
   8 -11 -13   93.30   12.70
   8 -11 -13  103.80    4.70
   8 -11 -13   94.00    5.00
  -8  11  14   52.80   10.70
  -8  11  14   58.70   10.20
   8 -11 -14   52.20    9.40
   8 -11 -14   49.30    3.00
  -8  11  15  141.00   19.00
  -8  11  15  167.20   12.50
   8 -11 -15  141.70   17.30
   8 -11 -15  120.50    4.60
   8 -11 -15  118.20    5.80
  -8  11  16   -2.30    2.70
   8 -11 -16    0.90    1.10
   8 -11 -16    1.80    1.70
   8 -11 -17   52.40    3.30
   8 -11 -17   44.50    3.90
  -8  12   1   18.80    5.80
  -8  12   1   21.60    2.50
   8 -12  -1   17.10    4.30
   8 -12  -1   22.10    3.60
   8 -12  -1   22.60    1.80
  -8  12   2  152.60    6.30
   8 -12  -2  178.60   16.50
   8 -12  -2  174.20    5.60
  -8  12   3    9.20    4.60
   8 -12  -3    7.70    3.20
   8 -12  -3   10.20    2.80
   8 -12  -3    8.90    1.80
  -8  12   4  137.50   16.10
   8 -12  -4  160.10   17.90
   8 -12  -4  144.20    5.90
  -8  12   5   26.70    6.40
   8 -12  -5   15.80    4.20
   8 -12  -5   24.20    3.40
   8 -12  -5   19.60    2.20
  -8  12   6  183.90   20.00
   8 -12  -6  180.30   20.10
   8 -12  -6  171.80   16.20
   8 -12  -6  182.30    6.90
  -8  12   7  141.30   16.20
   8 -12  -7  127.30   15.30
   8 -12  -7  131.60   12.40
   8 -12  -8   21.20    3.20
   8 -12  -8   21.00    2.40
  -8  12   9   61.80    9.50
  -8  12   9   31.50   12.80
   8 -12  -9   57.80    8.90
   8 -12  -9   56.00    5.80
   8 -12  -9   63.20    3.60
   8 -12  -9   70.20    4.20
  -8  12  10   11.50    4.70
  -8  12  10   11.70   16.10
   8 -12 -10    6.40    3.40
   8 -12 -10   10.50    2.80
   8 -12 -10    8.60    1.90
   8 -12 -10   10.70    2.00
  -8  12  11  181.80   21.30
  -8  12  11  174.20   30.80
   8 -12 -11  187.50   21.20
   8 -12 -11  202.10   18.70
   8 -12 -11  209.40    7.40
   8 -12 -11  202.80    7.60
  -8  12  12   61.70   17.70
   8 -12 -12   53.70    5.20
   8 -12 -12   55.70    3.60
   8 -12 -12   52.20    4.10
  -8  12  13   48.30    9.40
  -8  12  13   80.50   17.60
   8 -12 -13   65.30   10.10
   8 -12 -13   65.40    3.70
   8 -12 -13   71.80    4.50
  -8  12  14   54.30   11.10
  -8  12  14   43.70   11.00
   8 -12 -14   55.60    9.60
   8 -12 -14   43.60    3.00
   8 -12 -14   53.00    3.90
  -8  12  15   23.30    6.10
   8 -12 -15   21.00    2.80
  -8  12  16   60.30    6.50
   8 -12 -16   70.80    3.40
   8 -12 -16   61.80    4.30
  -8  12  17    3.70    2.20
   8 -12 -17    2.20    1.70
  -8  13   1   92.20   12.30
  -8  13   1  101.80    5.30
   8 -13  -1   93.70   11.70
   8 -13  -1   98.70    9.80
   8 -13  -1   84.70    3.40
  -8  13   2    4.30    4.10
  -8  13   2    1.60    1.40
   8 -13  -2    2.00    2.60
   8 -13  -2    3.60    2.70
   8 -13  -2    5.20    1.10
  -8  13   3   86.90   11.90
  -8  13   3   99.10    5.50
   8 -13  -3   89.20   11.60
   8 -13  -3   96.60    9.50
   8 -13  -3  106.40    4.10
  -8  13   4    3.00    4.00
  -8  13   4    4.60    2.00
   8 -13  -4    6.60    3.50
   8 -13  -4    8.30    2.70
   8 -13  -4    5.80    1.20
   8 -13  -4    3.80    1.50
  -8  13   5  195.00   21.40
  -8  13   5  202.60    9.50
   8 -13  -5  200.80   21.70
   8 -13  -5  207.20   19.00
   8 -13  -5  178.00    5.50
  -8  13   6   38.50    7.50
  -8  13   6   45.20    5.30
   8 -13  -6   35.40    6.60
   8 -13  -6   33.80    3.80
   8 -13  -6   35.00    2.40
  -8  13   7   92.90   12.30
  -8  13   7  111.00   10.70
   8 -13  -7   93.00   12.00
   8 -13  -7   88.90    8.70
   8 -13  -7   99.30    4.20
   8 -13  -7   98.00    5.60
  -8  13   8  115.90   14.30
  -8  13   8  131.80   17.70
   8 -13  -8  126.60   15.00
   8 -13  -8  129.40    5.20
   8 -13  -8  114.70    5.30
  -8  13   9   12.50    5.30
  -8  13   9   22.70   13.40
   8 -13  -9   10.60    3.80
   8 -13  -9   11.80    2.90
   8 -13  -9    8.20    1.70
   8 -13  -9    9.40    1.90
  -8  13  10   90.10   12.20
  -8  13  10   90.30   27.00
   8 -13 -10   76.80   10.60
   8 -13 -10   75.30    7.50
   8 -13 -10   78.20    4.10
   8 -13 -10   88.20    4.70
  -8  13  11  -15.30   15.80
   8 -13 -11    3.70    2.20
   8 -13 -11    2.80    1.50
   8 -13 -11    1.70    1.40
  -8  13  12  171.90   20.20
  -8  13  12  143.80   26.50
   8 -13 -12  177.60   19.90
   8 -13 -12  168.60    6.30
   8 -13 -12  159.20    6.50
  -8  13  13   55.90   10.60
   8 -13 -13   59.00    9.60
   8 -13 -13   51.20    3.70
  -8  13  14   19.40    9.40
   8 -13 -14   17.30    2.20
   8 -13 -14   22.40    2.70
  -8  13  15   32.20    6.70
  -8  13  16    0.90    2.50
   8 -13 -16    1.20    1.40
  -8  14   1   48.60    9.20
  -8  14   1   69.00    4.60
   8 -14  -1   62.60    9.10
   8 -14  -1   67.60    7.80
   8 -14  -1   60.30    2.90
  -8  14   2   67.20   10.50
   8 -14  -2  101.10   12.80
  -8  14   3   11.70    2.50
   8 -14  -3    9.80    3.60
   8 -14  -3   11.90    3.20
   8 -14  -3   12.40    1.50
  -8  14   4  106.80   14.40
  -8  14   4  132.50    7.40
   8 -14  -4  131.10   15.70
   8 -14  -4  152.30   14.20
   8 -14  -4  152.90    5.20
  -8  14   5    0.50    2.00
   8 -14  -5   -0.60    2.30
   8 -14  -5   -0.40    2.50
   8 -14  -5    1.00    1.00
   8 -14  -5    1.40    1.20
  -8  14   6   73.70   10.90
  -8  14   6   73.80    7.40
   8 -14  -6   67.70    9.70
   8 -14  -6   76.90    7.90
   8 -14  -6   73.90    3.50
   8 -14  -6   74.60    4.20
  -8  14   7   48.00    8.70
   8 -14  -7   43.40    7.30
   8 -14  -7   42.90    5.30
   8 -14  -7   55.50    3.10
   8 -14  -7   51.10    3.60
  -8  14   8   97.90   12.80
  -8  14   8   95.30   17.80
   8 -14  -8   83.90   11.10
   8 -14  -8   84.30    8.30
   8 -14  -8   87.60    4.70
  -8  14   9  147.90   17.60
  -8  14   9  107.50   25.20
   8 -14  -9  148.50   17.20
   8 -14  -9  153.10   14.30
   8 -14  -9  136.50    5.60
   8 -14  -9  149.10    6.30
  -8  14  10   -1.50    3.90
   8 -14 -10    1.50    3.00
   8 -14 -10    2.90    2.30
   8 -14 -10    1.30    1.30
  -8  14  11   78.50   11.80
  -8  14  11   86.90   25.20
   8 -14 -11   78.40   10.60
   8 -14 -11   74.10    4.00
   8 -14 -11   73.90    4.30
  -8  14  12    7.60    5.20
  -8  14  12   17.40   13.80
   8 -14 -12   10.60    4.10
   8 -14 -12    6.70    1.80
  -8  14  13  128.30   21.30
   8 -14 -13  118.00    5.00
  -8  14  14   23.70    9.30
   8 -14 -14   16.00    2.10
  -8  14  15    7.60    4.80
  -8  15   1   30.20    8.20
  -8  15   1   47.40    4.30
   8 -15  -1   43.10    7.30
   8 -15  -1   45.40    6.20
   8 -15  -1   54.40    2.90
  -8  15   2    4.60    5.00
  -8  15   2    7.40    2.50
   8 -15  -2    6.50    3.50
   8 -15  -2    5.20    3.00
   8 -15  -2    6.00    1.20
  -8  15   3   59.10    5.10
   8 -15  -3   51.60    8.10
   8 -15  -3   46.30    6.00
   8 -15  -3   51.60    2.80
  -8  15   4   10.30    5.20
  -8  15   4   12.40    3.10
   8 -15  -4   13.70    4.20
   8 -15  -4   14.30    3.50
   8 -15  -4   14.00    1.60
  -8  15   5  160.60   19.10
  -8  15   5  180.40   10.50
   8 -15  -5  183.40   19.90
   8 -15  -5  159.70   16.10
   8 -15  -5  184.80    6.00
  -8  15   6   12.30    5.70
  -8  15   6   14.70    5.10
   8 -15  -6   18.80    5.00
   8 -15  -6   12.60    3.20
   8 -15  -6   13.20    1.70
  -8  15   7   40.20    8.70
  -8  15   7   53.10   11.00
   8 -15  -7   36.10    6.70
   8 -15  -7   38.70    4.90
   8 -15  -7   41.60    2.70
  -8  15   8   24.10   12.60
   8 -15  -8   17.70    3.30
   8 -15  -8   18.20    2.00
  -8  15   9   22.40    6.70
  -8  15   9   25.80   15.00
   8 -15  -9   34.00    6.20
   8 -15  -9   23.90    3.80
   8 -15  -9   23.50    2.40
  -8  15  10  152.70   18.30
  -8  15  10  131.70   27.50
   8 -15 -10  147.80   17.10
   8 -15 -10  143.40    5.70
  -8  15  11    5.40    4.70
  -8  15  11   -0.70   15.60
   8 -15 -11    5.30    3.20
   8 -15 -11    7.00    1.80
  -8  15  12   66.70   20.00
   8 -15 -12   42.10    3.10
  -8  16   1   56.30   10.80
   8 -16  -1   96.70   12.80
   8 -16  -1   98.40   11.00
  -8  16   2   34.90    7.80
   8 -16  -2   86.20   11.30
  -8  16   3    9.00    4.80
   8 -16  -3    9.40    3.90
   8 -16  -3   11.10    3.70
  -8  16   4   63.00   10.40
  -8  16   5    5.70    5.00
  -8  16   6  123.70   13.20
   8 -16  -6  147.30   14.10
   8 -16  -6  125.20    4.90
  -8  16   7   36.80    7.90
  -8  16   7   28.60   13.70
   8 -16  -7   37.10    7.10
   8 -16  -7   40.30    5.40
   8 -16  -7   32.70    2.90
  -8  16   8   40.20    8.00
   8 -16  -8   42.40    7.40
  -8  16   9   36.50    7.90
   8 -16  -9   53.10    8.50
  -8  16  10    9.60    5.70
   8 -17  -1   39.20    8.60
   8 -17  -1   25.80    6.00
  -8  17   2   27.40    6.80
   8 -17  -2   62.80   10.10
   8 -17  -2   65.50    9.00
  -8  17   3   34.90    8.30
   8 -17  -3   54.30    7.10
  -8  17   4   25.00    7.20
   8 -17  -4   24.50    5.60
   8 -17  -4   27.40    5.10
  -8  17   5   73.60   11.70
   8 -17  -5   90.10   11.80
  -8  17   6   -2.70    5.00
   8 -17  -6    0.20    2.60
  -8  17   7   81.70   12.30
   8 -17  -7   99.80   13.20
  -8  17   8   35.00    8.90
   7  19  -1    0.80    2.90
  -7 -18   1   70.50   10.90
   7  18  -1   73.20    8.00
   7  18  -1   74.80    5.30
   7  18  -2    5.80    2.70
   7  18  -3  119.70   12.40
  -7 -17   1   10.50    4.90
  -7 -17   1   14.00    1.50
  -7 -17   1   12.70    2.30
   7  17  -1   16.80    4.00
   7  17  -1   15.80    3.00
  -7 -17   2  129.70   16.40
   7  17  -2  122.80   12.70
  -7 -17   3    2.40    3.40
   7  17  -3    6.10    3.30
   7  17  -4   99.70   10.80
   7  17  -5   30.30    5.50
  -7 -16   1  170.00   20.20
  -7 -16   1  154.90    4.70
  -7 -16   1  164.70    6.00
   7  16  -1  159.50   15.90
   7  16  -1  170.50    7.20
  -7 -16   2   32.80    7.20
  -7 -16   2   26.90    1.70
  -7 -16   2   28.80    2.50
   7  16  -2   30.00    5.00
  -7 -16   3  208.10   24.00
  -7 -16   3  204.70    5.20
  -7 -16   3  207.10    6.10
   7  16  -3  226.50   21.80
  -7 -16   4   29.40    7.00
   7  16  -4   31.20    5.20
   7  16  -5   75.70    8.90
   7  16  -6   27.10    5.30
  -7 -15   1  137.40   16.90
  -7 -15   1  122.80    4.70
   7  15  -1  122.20   12.70
   7  15  -1  127.70   17.00
   7  15  -1  139.00    6.00
  -7 -15   2  185.40   21.90
  -7 -15   2  179.50    4.80
  -7 -15   2  201.70    6.20
   7  15  -2  201.70   24.10
   7  15  -2  200.60    6.90
  -7 -15   3    0.50    3.00
  -7 -15   3    0.40    0.60
  -7 -15   3    0.40    0.90
   7  15  -3   -0.20    3.10
   7  15  -3    0.90    1.30
  -7 -15   4  161.70   20.20
   7  15  -4  174.20   17.70
  -7 -15   5   12.40    5.30
   7  15  -5    8.30    3.80
   7  15  -7   58.20    7.90
   7  15  -8   12.90    5.50
  -7 -14   1  147.40   17.70
  -7 -14   1  120.90    3.60
  -7 -14   1  133.70    4.70
   7  14  -1  143.50   14.60
   7  14  -1  152.60   19.10
   7  14  -1  149.40    5.90
  -7 -14   2   49.50    8.70
  -7 -14   2   55.20    2.10
  -7 -14   2   55.20    2.60
   7  14  -2   61.40    7.80
   7  14  -2   50.30   10.00
   7  14  -2   61.90    3.30
  -7 -14   3  187.90   21.80
  -7 -14   3  178.50    4.40
   7  14  -3  191.00   19.30
   7  14  -3  208.20   24.00
  -7 -14   4    7.00    4.30
   7  14  -4    6.30    3.60
   7  14  -4    5.70    5.10
   7  14  -5  116.10   13.00
  -7 -14   6   60.50   10.10
   7  14  -6   58.80    7.90
  -7 -14   7   39.40    8.30
   7  14  -7   39.20    6.80
  -7 -14   8   42.70    8.30
   7  14  -8   46.60    7.20
   7  14  -9    8.70    4.60
  -7 -13   1  196.40   22.20
  -7 -13   1  186.00    4.90
  -7 -13   1  195.50    5.70
   7  13  -1  185.90   18.90
   7  13  -1  185.60   22.20
  -7 -13   2  178.20    4.60
   7  13  -2  173.20   18.00
  -7 -13   3    8.10    4.20
   7  13  -3    6.30    3.40
   7  13  -3    2.50    5.00
  -7 -13   4  106.80   14.60
   7  13  -4  119.00   13.10
   7  13  -4  116.00   15.80
  -7 -13   5    6.40    3.70
   7  13  -5    3.10    3.60
   7  13  -5    7.60    5.40
  -7 -13   6  125.20   16.30
   7  13  -6  113.70   13.20
  -7 -13   7  100.90   14.00
   7  13  -7   95.70   11.50
  -7 -13   8   46.00    8.70
   7  13  -8   45.90    7.60
  -7 -13   9   58.20    9.50
   7  13  -9   50.40    7.50
   7  13 -10   23.20    6.10
  -7 -12   1  208.70   23.00
   7  12  -1  195.30    5.70
  -7 -12   2   83.70   12.30
  -7 -12   2   93.50    2.60
  -7 -12   2   92.00    2.70
   7  12  -2   96.00   10.80
   7  12  -2  104.00   14.10
  -7 -12   3  142.80   17.50
   7  12  -3  140.00   15.20
   7  12  -3  156.70   18.90
  -7 -12   4    5.40    3.60
   7  12  -4    3.00    3.10
   7  12  -4   -0.80    4.50
  -7 -12   5   81.00   12.00
   7  12  -5   84.90   10.40
   7  12  -5   83.60   12.70
  -7 -12   6    4.90    3.40
   7  12  -6    5.90    4.10
   7  12  -6    4.00    4.60
  -7 -12   7  163.80   20.30
   7  12  -7  178.60   19.10
   7  12  -7  182.90   22.90
   7  12  -8  104.10   12.60
  -7 -12   9   41.50    8.00
   7  12  -9   34.40    6.70
  -7 -12  10   62.20    9.70
   7  12 -10   58.10    9.40
   7  12 -11    8.00    5.00
  -7 -11   1  361.20   37.00
  -7 -11   1  364.20    8.30
   7  11  -1  340.00   33.80
   7  11  -1  332.70   35.30
   7  11  -1  344.60    8.30
  -7 -11   2  140.90   17.10
   7  11  -2  152.40   16.10
   7  11  -2  160.00   18.90
  -7 -11   3   69.60   11.20
   7  11  -3   69.50   11.00
  -7 -11   4  148.30   18.20
   7  11  -4  159.70   16.80
   7  11  -4  139.80   17.40
   7  11  -5    6.70    3.60
  -7 -11   6  117.30   15.40
   7  11  -6  118.30   13.70
   7  11  -6  120.90   15.80
  -7 -11   7   14.10    5.10
   7  11  -7    9.00    4.40
   7  11  -7    9.80    5.30
  -7 -11   8  145.00   18.50
   7  11  -8  166.30   20.70
  -7 -11  10   29.20    6.30
   7  11 -10   31.60    6.70
  -7 -11  11   46.70    8.20
   7  11 -11   37.60    7.90
  -7 -10   1   45.50    7.60
  -7 -10   1   50.10    1.70
  -7 -10   1   49.30    1.80
   7  10  -1   59.60    7.70
   7  10  -1   60.80    9.30
  -7 -10   2   96.20   12.90
   7  10  -2  122.90   13.50
   7  10  -2  118.80   14.80
  -7 -10   3   97.40   13.00
   7  10  -3  102.60   11.80
   7  10  -3   99.70   13.30
  -7 -10   4   64.60    9.90
   7  10  -4   67.00    8.80
   7  10  -4   58.80    9.20
  -7 -10   5  258.40   28.00
   7  10  -5  241.50   25.00
   7  10  -5  232.70   25.90
   7  10  -6    0.50    2.70
   7  10  -6    2.50    4.30
  -7 -10   7  180.30   21.20
   7  10  -7  174.50   19.40
   7  10  -7  186.30   21.80
  -7 -10   8   19.60    5.60
   7  10  -8   17.80    5.30
   7  10  -8   24.20    7.50
  -7 -10   9  114.50   15.10
   7  10  -9  118.20   16.20
   7  10 -10  106.90   13.70
  -7 -10  11    3.60    3.50
   7  10 -11    6.10    4.50
  -7 -10  12   68.60    9.80
   7  10 -12   81.00   11.00
  -7  -9   1  518.60   11.00
   7   9  -1  531.00   51.10
   7   9  -1  516.80   51.40
  -7  -9   2  157.40   18.30
   7   9  -2  155.80   16.90
   7   9  -2  150.40   17.60
  -7  -9   3  161.60   19.00
   7   9  -3  164.40   17.90
   7   9  -3  161.70   18.80
  -7  -9   4  205.80   23.40
   7   9  -4  204.70   21.80
   7   9  -4  209.30   22.90
  -7  -9   5   32.30    6.80
   7   9  -5   28.60    5.70
   7   9  -5   35.20    7.00
  -7  -9   6  374.80   39.10
   7   9  -6  352.30   36.60
   7   9  -6  389.30   39.40
  -7  -9   7   16.10    5.40
   7   9  -7   17.00    5.10
   7   9  -7   11.00    4.90
  -7  -9   8  120.00   15.60
   7   9  -8  127.30   15.40
   7   9  -8  128.20   16.50
  -7  -9   9   19.50    5.40
   7   9  -9   22.80    6.50
   7   9  -9   14.60    6.20
  -7  -9  10  102.50   13.40
   7   9 -10   78.10   12.60
   7   9 -10   89.10   13.30
  -7  -9  11  116.80   16.40
   7   9 -11  157.60   18.20
  -7  -9  12    2.60    3.50
   7   9 -12   10.30    5.80
  -7  -9  13   91.00   11.70
   7   9 -13   89.80   12.10
  -7  -8   1   57.70    8.50
   7   8  -1   61.90    8.40
   7   8  -1   42.40    7.40
  -7  -8   2  232.50   25.40
   7   8  -2  238.80   25.10
   7   8  -2  235.40   24.70
   7   8  -3  180.80   19.90
  -7  -8   4  132.30   16.30
   7   8  -4  153.10   17.10
   7   8  -4  127.40   15.70
  -7  -8   5  209.90   23.70
   7   8  -5  215.10   23.30
   7   8  -5  220.10   23.60
  -7  -8   6   19.60    5.30
   7   8  -6   21.80    5.30
   7   8  -6   17.00    5.20
  -7  -8   7  388.10   39.50
   7   8  -7  343.50   36.10
   7   8  -7  355.30   37.00
   7   8  -8   40.80    7.80
   7   8  -8   31.10    7.40
  -7  -8   9  160.00   18.80
   7   8  -9  160.50   19.10
   7   8  -9  160.90   19.40
  -7  -8  10   59.20    9.50
   7   8 -10   65.10   10.80
   7   8 -10   49.20    9.10
  -7  -8  11   63.70    9.60
   7   8 -11   56.20   10.40
   7   8 -11   42.90   10.10
  -7  -8  12   79.90   11.00
   7   8 -12   88.20   13.10
  -7  -8  13    2.70    3.10
   7   8 -13    3.00    4.20
   7   8 -14   72.40   11.20
  -7  -7   1  619.80   60.10
   7   7  -1  580.00   56.90
  -7  -7   2   38.40    6.80
   7   7  -2   47.90    7.20
   7   7  -2   46.20    7.50
  -7  -7   3  274.70   29.30
   7   7  -3  267.50   28.20
   7   7  -3  288.60   29.00
   7   7  -4  278.80   29.10
  -7  -7   5   81.90   11.30
   7   7  -5   72.00   10.40
   7   7  -5   82.20   11.50
   7   7  -6  327.00   34.00
   7   7  -6  332.80   34.20
  -7  -7   7    6.40    3.60
   7   7  -7   13.00    4.80
   7   7  -7    6.40    3.80
  -7  -7   8  277.30   29.50
   7   7  -8  251.30   27.80
   7   7  -8  283.40   29.50
   7   7  -9   28.30    6.50
  -7  -7  10  113.00   14.50
   7   7 -10  123.30   15.80
   7   7 -10  130.10   16.10
  -7  -7  11   39.70    7.30
   7   7 -11   47.80    9.40
   7   7 -11   45.40    8.40
  -7  -7  12   34.20    6.70
  -7  -7  13  115.00   14.10
   7   7 -13  118.70   16.10
  -7  -7  14    3.20    3.30
   7   6  -1   28.90    5.10
  -7  -6   2  520.40   52.40
   7   6  -2  539.50   52.90
   7   6  -2  549.10   52.70
  -7  -6   3   44.60    7.30
   7   6  -3   36.30    6.20
   7   6  -3   43.70    6.90
  -7  -6   4  369.40   36.90
  -7  -6   4  350.10   35.10
   7   6  -4  357.80   36.00
   7   6  -4  316.00   33.10
  -7  -6   5  359.30   37.20
   7   6  -5  371.80   37.70
  -7  -6   6  110.00   14.00
  -7  -6   6  116.70   14.30
   7   6  -6  111.90   13.90
   7   6  -6  113.60   13.90
  -7  -6   7  262.80   28.40
  -7  -6   7  260.00   28.10
   7   6  -7  266.20   28.40
   7   6  -7  280.40   28.70
  -7  -6   8   20.80    5.20
   7   6  -8   25.00    6.60
   7   6  -8   24.70    6.00
  -7  -6   9  213.30   23.10
   7   6  -9  178.20   21.00
   7   6  -9  190.20   21.20
  -7  -6  10   27.60    6.30
   7   6 -10   31.40    7.00
   7   6 -10   26.30    6.50
  -7  -6  11   54.50    8.40
   7   6 -11   56.80   10.10
   7   6 -11   55.80    9.00
  -7  -6  12   56.50    8.50
   7   6 -12   62.30    9.80
   7   6 -13   22.80    7.30
  -7  -6  14  165.10   18.50
   7   6 -14  181.10   21.90
  -7  -6  15    1.10    2.60
   7   6 -15    1.70    4.90
  -7  -5   1  682.50   68.30
  -7  -5   1  795.00   18.50
   7   5  -1  746.00   72.60
   7   5  -1  803.10   16.90
  -7  -5   2   87.00   10.40
   7   5  -2   94.40   11.30
  -7  -5   3  147.10   16.90
  -7  -5   3  160.20   18.10
   7   5  -3  164.10   18.70
   7   5  -3  154.30   16.60
  -7  -5   4   64.30    9.00
  -7  -5   4   71.40    9.70
   7   5  -4   65.50    9.10
   7   5  -4   68.60    9.10
  -7  -5   5  228.70   24.70
  -7  -5   5  225.00   23.80
   7   5  -5  213.90   23.60
   7   5  -5  239.60   24.50
  -7  -5   6  368.00   37.50
  -7  -5   6  351.30   35.90
   7   5  -6  369.20   37.40
   7   5  -6  345.00   35.30
  -7  -5   7    3.00    3.10
  -7  -5   7    5.00    4.60
   7   5  -7    3.20    3.20
   7   5  -7    5.90    3.80
  -7  -5   8  162.50   18.70
  -7  -5   8  165.90   19.20
   7   5  -8  157.90   18.60
   7   5  -8  176.40   19.10
  -7  -5   9    4.50    3.10
   7   5  -9    3.80    3.90
  -7  -5  10  164.10   18.90
  -7  -5  10  170.50   20.50
   7   5 -10  170.70   20.00
   7   5 -10  158.60   18.10
  -7  -5  11  118.70   14.40
  -7  -5  11  145.40   18.20
   7   5 -11  115.50   15.30
   7   5 -11  110.80   13.80
  -7  -5  12   79.90   10.60
  -7  -5  12   82.00   13.60
   7   5 -12   80.80   12.60
   7   5 -12   79.60   10.90
  -7  -5  13  125.30   15.00
   7   5 -13  141.90   18.30
  -7  -5  14   13.60    4.30
   7   5 -14   13.50    6.50
  -7  -5  15  132.80   15.20
   7   5 -16    2.60    4.50
  -7  -4   1   44.50    5.80
  -7  -4   1   55.10    1.80
  -7  -4   1   56.40    2.10
   7   4  -1   42.60    6.20
   7   4  -1   50.10    6.80
  -7  -4   2  342.70   33.80
   7   4  -2  344.10   34.70
   7   4  -2  352.10    7.50
  -7  -4   3   42.70    6.80
  -7  -4   3   47.40    6.90
   7   4  -3   40.20    6.40
  -7  -4   4  209.70   22.80
   7   4  -4  218.70   22.40
  -7  -4   5  239.70   25.90
  -7  -4   5  276.60   27.80
   7   4  -5  254.80   26.90
   7   4  -5  251.80   25.80
  -7  -4   6  178.60   19.50
   7   4  -6  164.90   18.80
  -7  -4   7  239.90   25.70
  -7  -4   7  231.70   25.00
   7   4  -7  242.30   27.50
  -7  -4   8   10.70    3.90
  -7  -4   8   15.80    5.40
   7   4  -8   16.70    5.00
   7   4  -8    9.40    4.10
  -7  -4   9  202.10   22.20
  -7  -4   9  221.80   24.30
   7   4  -9  208.40   23.30
   7   4  -9  212.70   22.50
  -7  -4  10   23.00    5.30
  -7  -4  10   15.20    6.00
   7   4 -10   24.90    6.00
   7   4 -10   18.20    5.20
  -7  -4  11  187.30   20.40
  -7  -4  11  187.60   22.60
   7   4 -11  168.30   19.90
   7   4 -11  172.40   19.30
  -7  -4  12  109.20   13.30
  -7  -4  12  116.10   16.10
   7   4 -12  119.50   15.60
   7   4 -12  109.60   13.40
  -7  -4  13  117.20   13.90
   7   4 -13  107.70   13.20
  -7  -4  14  169.50   22.20
  -7  -4  15   20.00    4.50
  -7  -4  15   18.90    8.30
   7   4 -15   18.40    6.80
   7   4 -16   64.70   11.30
  -7  -3   1  431.20   43.00
  -7  -3   1  433.50   42.00
  -7  -3   1  432.80    9.50
   7   3  -1  449.10   43.80
   7   3  -1  475.40   44.40
  -7  -3   2   44.10    6.10
  -7  -3   2   39.40    1.50
   7   3  -2   38.60    6.00
   7   3  -2   50.50    1.60
   7   3  -2   44.10    1.60
  -7  -3   3  756.90   72.70
   7   3  -3  764.50   74.10
   7   3  -3  778.10   16.20
  -7  -3   4   65.50    9.00
  -7  -3   4   72.80    9.10
   7   3  -4   73.30    9.60
   7   3  -4   78.20    9.40
  -7  -3   5  235.50   24.90
  -7  -3   5  245.40   25.40
   7   3  -5  234.70   25.30
   7   3  -5  263.90   26.00
  -7  -3   6  164.30   18.30
  -7  -3   6  170.90   18.60
   7   3  -6  165.30   18.70
   7   3  -6  156.70   17.20
  -7  -3   7  347.00   34.70
  -7  -3   7  323.10   33.20
   7   3  -7  309.10   32.70
   7   3  -7  316.40   32.10
  -7  -3   8  216.50   23.20
  -7  -3   8  223.50   24.00
   7   3  -8  225.70   24.40
   7   3  -8  200.90   21.70
  -7  -3   9    0.00    4.60
   7   3  -9    3.40    2.90
   7   3  -9    4.10    3.20
  -7  -3  10  265.00   27.50
  -7  -3  10  240.70   27.20
   7   3 -10  252.00   27.70
   7   3 -10  254.40   26.20
  -7  -3  11   58.30   10.10
   7   3 -11   58.70    9.40
   7   3 -11   43.70    8.00
  -7  -3  12  109.20   13.40
  -7  -3  12  130.20   16.90
   7   3 -12  109.30   14.60
   7   3 -12  120.50   13.90
  -7  -3  13  125.50   14.50
  -7  -3  13  123.60   17.40
   7   3 -13  121.00   15.70
   7   3 -13  123.10   14.10
  -7  -3  14   69.20    9.20
  -7  -3  14   63.60   12.80
   7   3 -14   53.70    9.60
  -7  -3  15   81.00   10.00
  -7  -3  15   66.30   13.10
   7   3 -15   72.60   12.10
  -7  -3  16    0.20    2.30
  -7  -3  16   -0.20    6.10
   7   3 -16    1.70    4.50
  -7  -3  17   24.40    6.70
   7   3 -17   41.30    8.70
  -7  -2   1   12.00    3.10
  -7  -2   1   13.60    3.40
  -7  -2   1   17.20    1.20
   7   2  -1    8.40    2.60
   7   2  -1    9.60    2.70
   7   2  -1   11.30    1.00
  -7  -2   2  455.20   46.20
  -7  -2   2  478.60   46.60
  -7  -2   2  511.90   11.40
   7   2  -2  481.60   47.70
   7   2  -2  490.30   47.10
   7   2  -2  521.40   11.40
   7   2  -2  490.30   10.80
  -7  -2   3    2.70    2.70
  -7  -2   3    4.70    0.80
   7   2  -3    2.20    2.40
   7   2  -3    2.60    0.50
  -7  -2   4  974.90   92.90
   7   2  -4  980.90   94.20
   7   2  -4  975.70   20.00
   7   2  -4  982.70   20.40
  -7  -2   5   95.70   11.70
  -7  -2   5  101.40    3.70
   7   2  -5   86.50   10.40
   7   2  -5   93.30    2.40
   7   2  -5   97.80    2.70
  -7  -2   6  336.40   34.60
  -7  -2   6  353.20   35.50
   7   2  -6  349.30   36.10
   7   2  -6  354.40   34.80
   7   2  -6  363.60    8.00
  -7  -2   7  155.20   17.70
   7   2  -7  163.10   18.60
  -7  -2   8  142.00   15.80
  -7  -2   8  135.50   16.00
   7   2  -8  126.80   15.50
   7   2  -8  129.70   14.50
  -7  -2   9  315.80   32.10
  -7  -2   9  331.30   33.90
   7   2  -9  290.00   31.50
   7   2  -9  313.70   31.30
  -7  -2  10    9.80    3.50
   7   2 -10   12.30    4.10
  -7  -2  11  333.40   34.00
  -7  -2  11  351.60   36.40
   7   2 -11  329.30   34.80
   7   2 -11  320.20   32.50
  -7  -2  12   48.40    7.50
  -7  -2  12   49.80    9.80
   7   2 -12   52.10    9.00
   7   2 -12   54.80    7.60
  -7  -2  13  103.80   12.50
  -7  -2  13  111.70   15.80
   7   2 -13  112.00   14.90
   7   2 -13  111.70   12.80
  -7  -2  14  104.30   12.50
  -7  -2  14  127.60   17.60
   7   2 -14   99.10   14.30
  -7  -2  15    5.20    3.00
  -7  -2  15    8.50    6.40
   7   2 -15    1.60    4.40
  -7  -2  16   68.90    9.20
   7   2 -16   65.80   11.70
  -7  -2  17    0.80    4.00
   7   2 -17    0.40    4.30
  -7  -1   1  622.10   59.30
  -7  -1   1  614.60   13.40
   7   1  -1  650.40   62.20
   7   1  -1  637.80   14.30
  -7  -1   2  134.30   14.60
  -7  -1   2  136.60   14.40
  -7  -1   2  141.50    4.10
   7   1  -2  129.50   14.90
   7   1  -2  135.80   14.00
   7   1  -2  146.40    3.90
   7   1  -2  148.70    4.40
  -7  -1   3  583.80   56.40
  -7  -1   3  569.60   54.80
  -7  -1   3  575.80   12.80
   7   1  -3  562.70   55.80
   7   1  -3  552.10   53.50
   7   1  -3  594.80   12.80
   7   1  -3  567.30   12.50
  -7  -1   4    8.50    3.50
  -7  -1   4    6.00    1.60
   7   1  -4   11.60    3.90
   7   1  -4   10.30    0.80
   7   1  -4   10.50    1.00
  -7  -1   5  894.00   84.40
   7   1  -5  816.40   81.80
   7   1  -5  873.10   18.60
   7   1  -5  825.00   17.20
  -7  -1   6  122.60   13.80
  -7  -1   6  121.00   13.90
  -7  -1   6  108.00    5.10
   7   1  -6  113.50   14.20
   7   1  -6  104.70   12.00
   7   1  -6  130.30    3.50
  -7  -1   7  124.30   14.70
  -7  -1   7  149.90   16.70
  -7  -1   7  150.10    4.70
   7   1  -7  133.30   16.30
   7   1  -7  131.60   14.60
   7   1  -7  126.80    3.20
  -7  -1   8  201.70   21.70
  -7  -1   8  212.10   22.80
  -7  -1   8  211.80    5.60
   7   1  -8  213.20   23.60
   7   1  -8  212.90   21.70
   7   1  -8  208.40    5.00
  -7  -1   9   37.20    6.00
  -7  -1   9   37.20    7.60
   7   1  -9   41.50    7.50
   7   1  -9   43.00    6.30
   7   1  -9   43.40    1.80
  -7  -1  10  318.40   32.30
  -7  -1  10  314.20   33.40
   7   1 -10  313.80   33.40
   7   1 -10  311.60   31.00
   7   1 -10  321.90    7.60
  -7  -1  11   20.70    4.70
  -7  -1  11   18.10    6.40
   7   1 -11   18.30    5.40
   7   1 -11   10.50    3.60
   7   1 -11   13.40    1.10
  -7  -1  12  166.50   18.40
  -7  -1  12  193.80   22.20
   7   1 -12  161.90   19.50
   7   1 -12  171.50   18.10
   7   1 -12  174.80    4.80
  -7  -1  13   69.80    9.10
  -7  -1  13   76.30   12.10
   7   1 -13   61.60   10.10
   7   1 -13   64.00    8.30
  -7  -1  14   66.40    8.70
  -7  -1  14   59.90   13.20
   7   1 -14   61.20    8.30
   7   1 -14   56.30    2.20
   7   1 -14   58.90    2.20
  -7  -1  15   48.10    7.30
  -7  -1  15   60.90   11.70
   7   1 -15   48.00    9.10
  -7  -1  16    3.40    3.30
  -7  -1  16    6.90    6.20
   7   1 -16    6.20    4.50
  -7  -1  17  136.40   18.30
   7   1 -17  196.00   22.60
  -7   0   1  188.70   18.50
  -7   0   1  168.80    4.70
   7   0  -1  164.10   18.20
   7   0  -1  217.30    6.70
  -7   0   2  225.70   23.20
  -7   0   2  247.70   24.20
  -7   0   2  233.00    6.10
   7   0  -2  237.40   24.80
   7   0  -2  240.40   23.40
   7   0  -2  264.50    6.50
   7   0  -2  245.20    6.50
  -7   0   3  183.70   19.10
  -7   0   3  177.20   18.50
  -7   0   3  185.30    5.20
   7   0  -3  194.60   20.80
   7   0  -3  187.30   18.60
   7   0  -3  199.90    5.10
   7   0  -3  190.60    5.30
  -7   0   4  556.50   54.00
  -7   0   4  560.60   13.50
   7   0  -4  586.60   57.00
   7   0  -4  580.30   54.70
   7   0  -4  562.70   12.00
   7   0  -4  568.50   12.80
  -7   0   5   36.70    5.90
  -7   0   5   28.80    6.10
   7   0  -5   36.90    6.50
   7   0  -5   35.10    1.70
   7   0  -5   38.60    1.90
  -7   0   6  460.30   43.60
  -7   0   6  479.30   20.80
   7   0  -6  407.90   41.90
   7   0  -6  392.00    8.90
   7   0  -6  410.40    9.50
  -7   0   7  159.50   17.20
  -7   0   7  166.60   18.30
  -7   0   7  166.90    7.50
   7   0  -7  171.00   19.60
   7   0  -7  162.20   16.80
   7   0  -7  168.90    4.50
   7   0  -7  157.90    4.50
  -7   0   8   93.40   11.20
  -7   0   8   99.60   12.30
  -7   0   8   90.90    4.20
   7   0  -8   89.20   12.20
   7   0  -8   97.60   10.80
   7   0  -8   94.50    2.90
   7   0  -8   91.50    3.20
  -7   0   9  344.40   34.50
  -7   0   9  349.50   35.60
  -7   0   9  346.30    9.20
   7   0  -9  324.40   34.80
   7   0  -9  340.60   33.30
   7   0  -9  334.50    7.70
   7   0  -9  345.00    8.50
  -7   0  10    0.70    2.50
  -7   0  10    0.20    3.80
  -7   0  10    1.60    1.00
   7   0 -10   -1.40    2.10
   7   0 -10    0.70    3.10
   7   0 -10    1.10    0.70
   7   0 -10    0.60    0.80
  -7   0  11  320.00   34.50
   7   0 -11  296.90   32.00
   7   0 -11  283.80   28.60
   7   0 -11  298.50    7.50
   7   0 -11  297.80    7.70
  -7   0  12   13.30    6.10
   7   0 -12    8.40    4.10
   7   0 -12    7.80    1.20
   7   0 -12    6.40    1.30
  -7   0  13  159.60   17.20
  -7   0  13  162.70   19.90
   7   0 -13  134.90   17.30
   7   0 -13  146.10   15.50
  -7   0  14   98.30   11.70
   7   0 -14  102.70   11.40
   7   0 -14   92.60    3.60
   7   0 -14   97.20    3.80
  -7   0  15   21.00    7.60
   7   0 -15   32.00    7.50
   7   0 -15   20.50    1.90
   7   0 -15   25.50    2.20
  -7   0  16   97.10   11.90
  -7   0  16   99.60   15.50
   7   0 -16  101.30   14.00
   7   0 -16   70.40    3.50
   7   0 -16   82.10    3.80
  -7   0  17   12.10    4.40
  -7   0  17    4.90    6.40
   7   0 -17   15.10    5.70
  -7   0  18   55.90   10.00
   7   0 -18  125.90   15.60
  -7   1   1  113.40   11.70
  -7   1   1  102.60    3.60
   7  -1  -1  111.90   12.60
   7  -1  -1  114.10    4.00
  -7   1   2  241.80   24.00
  -7   1   2  250.30   24.40
   7  -1  -2  243.20   25.10
   7  -1  -2  249.00   23.60
   7  -1  -2  242.00    6.60
  -7   1   3  480.30   47.10
  -7   1   3  513.60   48.80
  -7   1   3  527.40   12.50
   7  -1  -3  508.60   49.80
   7  -1  -3  492.30   46.80
   7  -1  -3  504.40   11.20
   7  -1  -3  478.90   11.00
  -7   1   4   16.60    3.40
  -7   1   4   21.40    4.50
  -7   1   4   17.70    1.60
   7  -1  -4   21.30    4.60
   7  -1  -4   25.80    4.00
   7  -1  -4   20.90    1.30
   7  -1  -4   21.20    1.50
  -7   1   5  452.50   43.90
  -7   1   5  469.00   14.70
   7  -1  -5  434.20   44.00
   7  -1  -5  437.40    9.90
   7  -1  -5  440.80   10.40
  -7   1   6  206.80   22.00
  -7   1   6  228.50   18.20
   7  -1  -6  226.20   24.20
   7  -1  -6  230.20    6.30
   7  -1  -6  206.60    5.70
  -7   1   7  135.80   15.30
  -7   1   7  154.50   11.40
   7  -1  -7  111.50   14.20
   7  -1  -7  128.10   13.30
  -7   1   8  295.30   29.60
  -7   1   8  293.10   30.20
  -7   1   8  308.70   11.80
   7  -1  -8  286.50   30.60
   7  -1  -8  295.20   28.60
   7  -1  -8  288.80    7.10
   7  -1  -8  280.60    7.30
  -7   1   9  164.10   17.80
  -7   1   9  173.50   19.30
  -7   1   9  160.80    6.30
   7  -1  -9  156.40   18.90
   7  -1  -9  173.30   17.60
   7  -1  -9  186.40    5.20
   7  -1  -9  177.30    5.40
  -7   1  10  367.10   36.40
  -7   1  10  359.80   37.30
   7  -1 -10  382.90   39.50
   7  -1 -10  359.70   35.10
   7  -1 -10  371.40    9.50
  -7   1  11    5.70    2.80
  -7   1  11    3.60    4.60
   7  -1 -11    3.90    3.10
   7  -1 -11    2.20    2.80
   7  -1 -11    6.30    1.30
  -7   1  12  270.50   29.00
   7  -1 -12  228.00   26.10
   7  -1 -12  248.40    6.80
   7  -1 -12  244.80    7.10
  -7   1  13    5.30    2.80
  -7   1  13    7.20    5.20
   7  -1 -13    5.70    3.80
   7  -1 -13    6.80    3.30
   7  -1 -13    7.90    1.30
   7  -1 -13    6.40    1.50
  -7   1  14  181.90   19.80
   7  -1 -14  171.60   20.90
   7  -1 -14  183.50   18.30
   7  -1 -14  177.20    5.60
   7  -1 -14  181.40    6.20
  -7   1  15   86.80   14.20
   7  -1 -15   96.00   13.70
   7  -1 -15   92.90    4.00
   7  -1 -15   93.70    4.30
  -7   1  16   45.30    7.40
  -7   1  16   58.50   11.60
   7  -1 -16   53.30    9.80
   7  -1 -16   41.50    2.90
   7  -1 -16   39.70    3.20
  -7   1  17  101.60   12.20
  -7   1  17   96.30   15.40
   7  -1 -17   93.60   14.00
  -7   1  18   -0.50    4.50
   7  -1 -18    1.30    4.30
  -7   2   1  107.20   11.10
  -7   2   1   93.70    3.50
   7  -2  -1   85.50   10.30
  -7   2   2  332.20   32.00
  -7   2   2  320.60   31.50
  -7   2   2  343.90    8.90
   7  -2  -2  336.90   33.50
   7  -2  -2  310.00   29.90
   7  -2  -2  353.00    8.60
   7  -2  -2  310.70    8.00
  -7   2   3  232.70   23.30
  -7   2   3  250.80   24.60
  -7   2   3  262.30    7.30
   7  -2  -3  223.70   24.00
   7  -2  -3  254.90   23.70
   7  -2  -3  225.20    5.60
   7  -2  -3  239.20    6.70
  -7   2   4  478.80   46.10
  -7   2   4  510.40   48.20
   7  -2  -4  482.40   47.80
   7  -2  -4  491.50   45.90
   7  -2  -4  473.90   10.60
   7  -2  -4  467.80   11.10
  -7   2   5    7.60    2.50
  -7   2   5    5.80    3.20
  -7   2   5    9.50    1.90
   7  -2  -5   10.50    3.50
   7  -2  -5    6.80    2.60
   7  -2  -5    7.70    1.00
   7  -2  -5    6.50    1.10
  -7   2   6  481.00   46.60
   7  -2  -6  463.70   46.60
   7  -2  -6  463.60   10.90
   7  -2  -6  459.50   11.00
  -7   2   7   67.60    9.30
  -7   2   7   60.40   11.70
   7  -2  -7   60.80    9.10
   7  -2  -7   69.80    3.00
   7  -2  -7   60.10    2.80
  -7   2   8  375.00   36.70
  -7   2   8  370.80   37.40
   7  -2  -8  392.80   39.40
   7  -2  -8  370.10   35.40
   7  -2  -8  352.70    8.70
   7  -2  -8  366.80    9.40
  -7   2   9  319.30   31.90
  -7   2   9  313.00   32.50
  -7   2   9  307.50   12.10
   7  -2  -9  316.20   33.40
   7  -2  -9  318.60   30.80
   7  -2  -9  324.70    8.10
   7  -2  -9  320.10    8.60
  -7   2  10   55.20    7.40
  -7   2  10   59.90    9.30
  -7   2  10   56.50    4.10
   7  -2 -10   59.10    9.30
   7  -2 -10   58.40    7.00
   7  -2 -10   62.00    2.60
   7  -2 -10   60.50    3.00
  -7   2  11  282.80   28.70
  -7   2  11  273.50   29.60
  -7   2  11  283.80    9.30
   7  -2 -11  271.10   29.80
   7  -2 -11  282.10   27.40
   7  -2 -11  290.80    7.60
   7  -2 -11  270.90    7.70
  -7   2  12   15.60    6.00
  -7   2  12   15.60    2.20
   7  -2 -12   11.30    4.30
   7  -2 -12   15.40    1.50
  -7   2  13  186.60   20.10
  -7   2  13  187.90   22.20
  -7   2  13  175.70    6.50
   7  -2 -13  174.70   20.90
   7  -2 -13  181.20   18.10
   7  -2 -13  194.50    6.00
   7  -2 -13  186.50    6.40
  -7   2  14    7.10    3.80
  -7   2  14    6.00    5.60
  -7   2  14    6.00    1.10
   7  -2 -14    6.80    4.00
   7  -2 -14    4.80    2.50
   7  -2 -14    6.40    1.30
   7  -2 -14    4.20    1.50
  -7   2  15   88.30   11.60
  -7   2  15   83.90   13.80
  -7   2  15  104.70    3.90
   7  -2 -15   95.80   13.70
   7  -2 -15   97.10    4.20
   7  -2 -15   89.60    4.40
  -7   2  16   78.80   10.40
  -7   2  16   84.40   14.30
   7  -2 -16   72.90   11.70
   7  -2 -16   77.90    3.90
   7  -2 -16   71.30    4.10
  -7   2  17   10.10    3.80
  -7   2  17    6.50    6.40
   7  -2 -17   10.40    5.20
  -7   2  18   61.70   11.10
   7  -2 -18   63.50   10.40
  -7   3   1  315.30   30.40
  -7   3   1  305.70    8.10
   7  -3  -1  326.60   32.00
  -7   3   2  233.60   23.50
  -7   3   2  257.20   25.00
  -7   3   2  258.20    7.30
   7  -3  -2  246.20   25.20
   7  -3  -2  261.90   24.00
   7  -3  -2  239.20    6.10
  -7   3   3  561.30   53.00
  -7   3   3  517.60   50.80
  -7   3   3  575.30   13.90
   7  -3  -3  537.60   52.90
   7  -3  -3  531.20   50.30
  -7   3   4   79.00    9.00
  -7   3   4   96.40   10.80
  -7   3   4   93.10    3.90
   7  -3  -4   76.10    9.90
   7  -3  -4   91.90    8.90
   7  -3  -4   71.90    2.60
  -7   3   5  673.40   64.60
  -7   3   5  717.20   18.40
   7  -3  -5  693.80   64.60
   7  -3  -5  698.10   15.40
   7  -3  -5  649.30   14.70
  -7   3   6   45.30    6.90
  -7   3   6   48.60    5.50
   7  -3  -6   54.60    8.10
   7  -3  -6   41.10    2.20
   7  -3  -6   40.10    2.40
  -7   3   7  461.60   45.40
  -7   3   7  450.40   27.20
   7  -3  -7  435.20   44.90
   7  -3  -7  474.70   11.70
  -7   3   8   21.20    5.60
  -7   3   8   14.80    7.70
   7  -3  -8   16.10    4.70
   7  -3  -8    7.60    1.40
  -7   3   9  140.20   15.60
  -7   3   9  139.20   16.60
  -7   3   9  164.60   11.70
   7  -3  -9  149.70   17.80
   7  -3  -9  156.40   15.40
   7  -3  -9  158.70    5.10
  -7   3  10  132.50   14.80
  -7   3  10  126.40   15.60
  -7   3  10  117.10    7.20
   7  -3 -10  127.90   15.90
   7  -3 -10  125.80   12.80
   7  -3 -10  133.00    4.30
   7  -3 -10  131.00    4.80
  -7   3  11   66.60    9.00
  -7   3  11   76.20   11.30
  -7   3  11   77.20    5.10
   7  -3 -11   67.20   10.20
   7  -3 -11   72.30    8.00
   7  -3 -11   79.20    3.10
   7  -3 -11   80.30    3.70
  -7   3  12  266.30   28.20
   7  -3 -12  222.20   25.60
   7  -3 -12  250.10    7.00
   7  -3 -12  237.70    7.30
  -7   3  13    5.80    3.50
  -7   3  13    5.70    4.90
  -7   3  13    9.10    1.20
  -7   3  13    6.60    1.80
   7  -3 -13    6.40    3.60
   7  -3 -13    9.60    3.00
   7  -3 -13    6.20    1.30
   7  -3 -13    6.70    1.50
  -7   3  14  134.30   14.90
  -7   3  14  119.00    4.10
  -7   3  14  125.60    5.90
   7  -3 -14  104.70   14.80
   7  -3 -14  116.60   11.90
   7  -3 -14  118.10    4.40
   7  -3 -14  106.50    4.80
  -7   3  15   33.40    6.70
  -7   3  15   28.20    7.90
  -7   3  15   38.70    2.30
   7  -3 -15   42.20    8.30
   7  -3 -15   33.60    2.50
   7  -3 -15   29.10    2.70
  -7   3  16   48.00    7.60
  -7   3  16   61.00   11.60
  -7   3  16   58.20    2.90
   7  -3 -16   44.80    9.10
   7  -3 -16   49.30    3.60
  -7   3  17   93.30   11.50
  -7   3  17  111.60   16.60
   7  -3 -17   88.80   13.30
   7  -3 -17  105.00    4.90
   7  -3 -17   77.20    4.60
  -7   3  18    2.70    5.80
   7  -3 -18   -1.70    3.10
  -7   4   1  491.40   48.00
  -7   4   1  521.70   49.60
  -7   4   1  561.60   13.90
   7  -4  -1  526.90   50.90
   7  -4  -1  525.20   48.40
   7  -4  -1  517.90   11.80
   7  -4  -1  500.30   12.20
  -7   4   2  191.60   19.10
  -7   4   2  184.90   18.80
   7  -4  -2  195.40   20.30
   7  -4  -2  193.20   17.80
   7  -4  -2  196.70    5.40
   7  -4  -2  181.30    5.70
  -7   4   3  228.00   22.80
  -7   4   3  218.10   22.10
  -7   4   3  220.30    6.60
   7  -4  -3  232.40   24.00
   7  -4  -3  233.40   21.50
   7  -4  -3  232.60    6.20
   7  -4  -3  223.90    6.70
  -7   4   4  397.00   38.90
  -7   4   4  390.30   38.50
  -7   4   4  410.70   10.90
   7  -4  -4  423.30   41.40
   7  -4  -4  407.70   37.80
   7  -4  -4  412.00    9.80
   7  -4  -4  385.80    9.80
  -7   4   5   77.60    9.30
  -7   4   5   98.80    4.80
   7  -4  -5   85.20    8.30
   7  -4  -5   72.60    2.70
   7  -4  -5   82.90    3.60
  -7   4   6  331.20   32.90
  -7   4   6  345.80   33.90
  -7   4   6  346.50   12.80
   7  -4  -6  358.30   35.80
   7  -4  -6  328.50   31.10
   7  -4  -6  321.30    8.00
   7  -4  -6  318.90    8.50
  -7   4   7   47.70    7.40
  -7   4   7   48.00    9.60
   7  -4  -7   49.10    7.80
   7  -4  -7   36.80    2.20
   7  -4  -7   36.10    2.40
  -7   4   8  474.60   47.70
   7  -4  -8  503.80   50.30
   7  -4  -8  521.50   12.90
   7  -4  -8  492.90   12.30
  -7   4   9  237.70   24.40
  -7   4   9  212.30   23.20
  -7   4   9  216.10   16.70
   7  -4  -9  237.10   25.40
   7  -4  -9  221.30   21.30
   7  -4  -9  238.70    7.10
   7  -4  -9  212.80    6.60
  -7   4  10  125.10   14.20
  -7   4  10  123.90   15.40
  -7   4  10  116.90    9.10
   7  -4 -10  121.00   15.20
   7  -4 -10  133.00   12.90
   7  -4 -10  131.80    4.60
   7  -4 -10  119.30    4.60
  -7   4  11  141.10   16.00
  -7   4  11  144.90   17.30
  -7   4  11  167.50    5.20
  -7   4  11  163.40    9.00
   7  -4 -11  139.10   17.30
   7  -4 -11  153.40   14.80
   7  -4 -11  138.00    4.50
   7  -4 -11  136.90    5.10
  -7   4  12    8.40    3.20
  -7   4  12   14.70    5.90
  -7   4  12   16.60    1.50
  -7   4  12   23.90    3.20
   7  -4 -12   17.00    5.20
   7  -4 -12   10.50    2.80
   7  -4 -12   16.50    1.60
   7  -4 -12   17.60    2.00
  -7   4  13  270.10   26.90
  -7   4  13  255.00   28.00
  -7   4  13  238.10    6.50
  -7   4  13  256.50    9.60
   7  -4 -13  243.70   27.10
   7  -4 -13  244.70   23.50
   7  -4 -13  224.80    7.30
  -7   4  14   42.80    7.00
  -7   4  14   37.70    2.20
   7  -4 -14   40.60    5.40
   7  -4 -14   41.90    2.60
   7  -4 -14   29.50    2.60
  -7   4  15   67.30   11.80
  -7   4  15   60.10    2.90
  -7   4  15   66.90    4.40
   7  -4 -15   51.80    9.00
   7  -4 -15   59.50    3.10
   7  -4 -15   42.70    3.10
  -7   4  16   77.50   10.40
  -7   4  16   84.10   13.60
  -7   4  16   73.10    3.30
   7  -4 -16   68.50   11.40
  -7   4  17   68.20    9.40
  -7   4  17   81.30   14.10
   7  -4 -17   69.30   11.30
  -7   4  18   92.70   14.40
   7  -4 -18   92.50   13.50
  -7   5   1   62.60    7.40
  -7   5   1   64.80    7.50
  -7   5   1   71.80    3.40
   7  -5  -1   75.00    9.00
   7  -5  -1   68.70    6.10
   7  -5  -1   75.30    3.00
   7  -5  -1   67.30    3.20
  -7   5   2  445.80   43.10
  -7   5   2  455.20   43.50
  -7   5   2  444.20   11.30
   7  -5  -2  457.80   44.60
   7  -5  -2  468.80   42.50
   7  -5  -2  460.50   10.80
   7  -5  -2  436.40   11.00
  -7   5   3  213.40    6.70
   7  -5  -3  212.00   22.10
   7  -5  -3  213.60   19.60
   7  -5  -3  223.80    6.20
   7  -5  -3  193.90    6.00
  -7   5   4  204.30   21.40
  -7   5   4  240.50   23.50
  -7   5   4  244.60    7.70
   7  -5  -4  217.00   23.20
   7  -5  -4  234.60   21.50
   7  -5  -4  218.50    5.90
   7  -5  -4  226.80    6.90
  -7   5   5  256.80   26.10
  -7   5   5  281.00   27.60
  -7   5   5  272.50    8.80
   7  -5  -5  301.70   30.30
   7  -5  -5  274.50   25.30
   7  -5  -5  257.10    6.70
   7  -5  -5  252.70    7.30
  -7   5   6   14.30    3.40
  -7   5   6   22.20    5.20
  -7   5   6   18.40    2.90
   7  -5  -6   15.60    4.30
   7  -5  -6   17.80    2.90
   7  -5  -6   15.50    1.40
   7  -5  -6   18.00    1.70
  -7   5   7  219.40   22.50
  -7   5   7  222.90   23.10
   7  -5  -7  209.20   22.90
   7  -5  -7  223.50   21.00
   7  -5  -7  215.40    6.30
   7  -5  -7  212.40    6.60
  -7   5   8   37.00    6.70
  -7   5   8   39.30   12.20
   7  -5  -8   50.10    7.80
   7  -5  -8   42.40    2.70
   7  -5  -8   44.50    2.70
  -7   5   9  247.30   26.40
  -7   5   9  247.30   21.00
   7  -5  -9  236.30   26.30
   7  -5  -9  280.50    8.30
   7  -5  -9  264.10    7.90
  -7   5  10  134.60   15.00
  -7   5  10  146.10   13.90
   7  -5 -10  146.70   14.10
   7  -5 -10  147.10    5.20
   7  -5 -10  131.40    4.90
  -7   5  11   80.20   10.00
  -7   5  11   83.60   11.60
  -7   5  11   92.40    3.60
   7  -5 -11   83.40   11.60
   7  -5 -11   82.60    8.50
   7  -5 -11   76.80    3.80
  -7   5  12  212.50   22.00
  -7   5  12  204.30   22.90
  -7   5  12  216.40    6.30
  -7   5  12  217.30   10.60
   7  -5 -12  194.50   22.50
   7  -5 -12  197.50   19.10
   7  -5 -12  194.50    5.80
   7  -5 -12  182.50    6.30
  -7   5  13    5.20    3.00
  -7   5  13    1.70    4.70
   7  -5 -13    5.20    1.20
   7  -5 -13    3.00    1.40
  -7   5  14  223.90    6.20
  -7   5  14  247.80    9.50
   7  -5 -14  264.30   24.50
   7  -5 -14  259.80    7.60
  -7   5  15   30.70    8.30
  -7   5  15   37.10    2.50
  -7   5  15   33.60    3.50
   7  -5 -15   32.80    7.20
   7  -5 -15   38.30    2.60
   7  -5 -15   29.30    2.80
  -7   5  16   67.80    9.30
  -7   5  16   66.20   12.10
  -7   5  16   57.00    2.90
  -7   5  16   67.80    4.70
   7  -5 -16   66.80   10.30
   7  -5 -16   58.70    3.10
   7  -5 -16   48.40    3.60
  -7   5  17   39.10    7.10
  -7   5  17   45.10   10.10
  -7   5  17   40.90    2.60
  -7   5  17   31.20    3.40
   7  -5 -17   39.90    8.30
   7  -5 -17   39.90    3.10
   7  -5 -17   33.70    3.20
  -7   5  18   43.70   10.00
   7  -5 -18   35.50    7.90
   7  -5 -18   39.10    3.40
   7  -5 -18   37.40    3.60
  -7   6   1  468.20   45.20
  -7   6   1  479.90   12.20
   7  -6  -1  500.60   47.90
   7  -6  -1  519.40   46.20
   7  -6  -1  479.00   11.20
   7  -6  -1  464.80   11.80
  -7   6   2   56.70    7.20
  -7   6   2   68.00    7.90
   7  -6  -2   69.60    8.60
   7  -6  -2   66.30    5.80
   7  -6  -2   53.50    2.90
  -7   6   3  469.60   45.50
  -7   6   3  485.20   46.10
   7  -6  -3  480.10   46.70
   7  -6  -3  448.70   42.10
   7  -6  -3  474.10   12.20
   7  -6  -4  250.10   22.80
   7  -6  -4  241.10    7.30
  -7   6   5   82.50    9.80
  -7   6   5   95.70   10.90
   7  -6  -5   87.30   10.80
   7  -6  -5   88.50    8.20
  -7   6   6  232.70   23.60
   7  -6  -6  225.50   23.90
   7  -6  -6  220.00    6.80
  -7   6   7    5.30    2.70
  -7   6   7    7.60    3.40
   7  -6  -7   11.10    3.90
   7  -6  -7    8.40    2.20
   7  -6  -7    9.30    1.50
  -7   6   8  510.30   50.70
  -7   6   8  556.10   53.50
   7  -6  -8  543.60   53.70
   7  -6  -8  548.20   50.50
   7  -6  -8  525.20   13.20
  -7   6   9   87.20   11.50
  -7   6   9   96.50   17.20
   7  -6  -9  109.10   13.40
   7  -6  -9   99.90    4.40
   7  -6  -9   95.60    4.30
  -7   6  10  215.50   23.10
  -7   6  10  198.30   17.80
   7  -6 -10  201.80   22.60
   7  -6 -10  213.60    6.90
   7  -6 -10  199.60    6.70
  -7   6  11  163.60   18.70
  -7   6  11  181.30   14.20
   7  -6 -11  153.10   18.20
   7  -6 -11  169.30    5.70
   7  -6 -11  151.50    5.70
  -7   6  12   23.50    4.90
  -7   6  12   27.20    6.80
  -7   6  12   29.90    5.20
   7  -6 -12   29.70    6.30
   7  -6 -12   26.70    3.70
   7  -6 -12   25.20    2.00
  -7   6  13  175.90   18.90
  -7   6  13  175.90   20.50
  -7   6  13  170.90    5.40
  -7   6  13  172.10    9.10
   7  -6 -13  167.70   19.90
   7  -6 -13  172.60   16.40
  -7   6  14    5.00    3.50
  -7   6  14    2.70    5.00
  -7   6  14    4.40    1.00
  -7   6  14    2.60    2.30
   7  -6 -14    0.10    2.50
   7  -6 -14    4.20    1.30
   7  -6 -14    2.90    1.50
  -7   6  15  149.20   16.90
  -7   6  15  154.20   19.70
  -7   6  15  139.50    4.70
  -7   6  15  158.00    7.50
   7  -6 -15  158.60   18.90
  -7   6  16   17.70    5.10
  -7   6  16   19.90    7.60
  -7   6  16   17.70    1.80
  -7   6  16   20.80    3.00
   7  -6 -16   10.20    4.40
   7  -6 -16   16.40    1.90
   7  -6 -16   17.40    2.40
  -7   6  17   57.80    9.70
  -7   6  17   79.70   13.50
  -7   6  17   75.90    3.60
   7  -6 -17   71.70   11.20
   7  -6 -17   83.60    4.00
   7  -6 -17   77.50    4.80
  -7   6  18   37.80    9.50
   7  -6 -18   34.60    7.60
   7  -6 -18   37.80    3.10
   7  -6 -18   32.20    3.60
  -7   7   1   36.40    5.40
  -7   7   1   38.60    2.60
   7  -7  -1   35.50    5.50
   7  -7  -1   34.90    3.00
   7  -7  -1   32.10    1.90
   7  -7  -1   36.20    2.80
  -7   7   2  333.10   31.70
  -7   7   2  305.20    8.70
   7  -7  -2  339.70   33.00
   7  -7  -2  328.50   29.30
   7  -7  -2  303.90    7.70
   7  -7  -2  296.20    8.50
  -7   7   3   47.40    2.90
   7  -7  -3   57.70    5.10
   7  -7  -3   60.40    2.80
   7  -7  -3   47.50    2.90
   7  -7  -4   86.40   10.80
   7  -7  -4   92.00    8.20
  -7   7   5  182.80   19.70
  -7   7   5  192.50   19.80
  -7   7   5  196.80    7.50
   7  -7  -5  196.60   20.90
   7  -7  -5  190.30   17.40
   7  -7  -5  189.80    5.60
   7  -7  -5  185.20    6.30
  -7   7   6   51.30    7.40
  -7   7   6   54.70    7.50
  -7   7   6   60.20    4.70
   7  -7  -6   52.90    7.80
   7  -7  -6   59.50    5.60
   7  -7  -6   51.80    2.50
   7  -7  -6   51.50    3.10
  -7   7   7  588.20   56.00
  -7   7   7  547.60   53.50
  -7   7   7  559.10   21.30
   7  -7  -7  564.50   55.30
   7  -7  -7  528.20   50.00
   7  -7  -7  567.40   13.60
   7  -7  -7  552.70   14.00
  -7   7   8   35.00    5.60
  -7   7   8   26.70    5.50
  -7   7   8   27.00    9.20
   7  -7  -8   43.10    7.30
   7  -7  -8   36.50    3.90
  -7   7   9  320.30   32.90
  -7   7   9  367.80   30.30
   7  -7  -9  333.00   31.10
   7  -7  -9  343.10    9.70
  -7   7  10   61.30    9.10
  -7   7  10   35.60   11.40
   7  -7 -10   41.90    7.40
   7  -7 -10   53.80    3.20
  -7   7  11  155.50   17.60
  -7   7  11  165.90   18.80
  -7   7  11  190.60   17.10
   7  -7 -11  162.00   18.90
   7  -7 -11  164.00   15.70
   7  -7 -11  166.00    5.80
   7  -7 -11  158.50    5.90
  -7   7  12  128.30   14.80
  -7   7  12  139.20   16.70
  -7   7  12  156.30    5.10
  -7   7  12  143.70   11.30
   7  -7 -12  152.90   18.00
   7  -7 -12  154.90   14.40
   7  -7 -12  140.40    5.00
   7  -7 -12  136.60    5.60
  -7   7  13   14.20    4.30
  -7   7  13    6.90    5.00
  -7   7  13   14.50    1.50
  -7   7  13   18.20    4.30
   7  -7 -13   15.30    4.80
   7  -7 -13   11.80    2.50
   7  -7 -13   12.40    1.70
   7  -7 -13   10.80    2.00
  -7   7  14   89.30   11.40
  -7   7  14   91.30   13.20
  -7   7  14   69.90    3.10
  -7   7  14   78.00    6.30
   7  -7 -14   91.00   12.40
   7  -7 -14   83.90    3.70
   7  -7 -14   72.20    4.10
  -7   7  15    3.00    3.60
  -7   7  15    2.20    5.00
  -7   7  15    3.10    1.10
   7  -7 -15    2.80    3.50
   7  -7 -15    1.70    1.40
  -7   7  16  126.80   15.40
  -7   7  16  149.80   20.10
  -7   7  16  132.60    4.80
  -7   7  16  132.10    6.80
   7  -7 -16  149.70   18.10
   7  -7 -16  141.80    5.20
   7  -7 -16  138.50    6.30
  -7   7  17   33.10    9.10
  -7   7  17   28.70    3.50
   7  -7 -17   25.10    6.00
   7  -7 -17   37.10    2.70
  -7   7  18   19.80    7.30
  -7   7  18   23.00    2.30
  -7   7  18   17.30    2.90
   7  -7 -18   18.80    5.50
   7  -7 -18   20.00    2.20
   7  -7 -18   16.00    2.80
  -7   8   1  285.70    8.50
   7  -8  -1  275.50   27.90
   7  -8  -1  304.90   26.80
   7  -8  -1  278.60    7.30
   7  -8  -1  255.80    7.80
  -7   8   2    9.60    1.50
   7  -8  -2   11.60    1.90
   7  -8  -2   14.40    1.40
   7  -8  -2   10.30    1.60
  -7   8   3  314.30   30.80
  -7   8   3  301.70    8.80
   7  -8  -3  308.30   31.50
   7  -8  -3  334.90   30.00
   7  -8  -3  335.90    8.70
   7  -8  -3  309.40    9.00
  -7   8   4  200.90   21.00
   7  -8  -4  217.60   22.80
   7  -8  -4  221.10   20.00
   7  -8  -4  227.00    6.40
   7  -8  -4  207.10    6.80
  -7   8   5  114.30   12.70
  -7   8   5  116.00    5.60
   7  -8  -5  113.70   13.30
   7  -8  -5  109.40   10.00
   7  -8  -5  108.20    3.80
   7  -8  -5  115.40    4.80
  -7   8   6  470.60   45.90
  -7   8   6  452.40   14.30
   7  -8  -6  478.20   47.20
   7  -8  -6  470.00   43.40
   7  -8  -6  489.20   12.10
   7  -8  -6  468.40   12.70
  -7   8   7   83.50   10.60
  -7   8   7   90.70   10.80
  -7   8   7   75.20    7.00
   7  -8  -7   85.80   10.90
   7  -8  -7   86.90    8.00
   7  -8  -7   77.70    3.30
   7  -8  -7   86.50    4.20
  -7   8   8  390.60   40.30
  -7   8   8  418.80   41.70
  -7   8   8  493.70   28.20
   7  -8  -8  407.00   41.80
   7  -8  -8  439.10   40.10
   7  -8  -8  437.50   11.30
   7  -8  -8  431.00   11.80
  -7   8   9    9.50    3.80
  -7   8   9    6.30    3.60
  -7   8   9    0.60   10.50
   7  -8  -9   10.00    3.80
   7  -8  -9   10.90    2.30
   7  -8  -9   10.60    1.80
   7  -8  -9    8.70    1.60
  -7   8  10  217.90   22.80
  -7   8  10  200.70   23.50
   7  -8 -10  213.30   23.10
   7  -8 -10  202.80    6.80
   7  -8 -10  187.10    6.60
  -7   8  11   42.40    7.70
  -7   8  11   61.40   12.70
   7  -8 -11   52.90    8.70
   7  -8 -11   33.80    2.70
   7  -8 -11   33.90    2.70
  -7   8  12   69.00    9.30
  -7   8  12   55.30    9.30
  -7   8  12   58.40   10.10
   7  -8 -12   57.90    9.50
   7  -8 -12   68.40    6.70
   7  -8 -12   75.40    3.80
   7  -8 -12   62.10    3.70
  -7   8  13  101.80   12.90
  -7   8  13  100.30   13.80
  -7   8  13  108.60    4.10
   7  -8 -13  103.80   13.60
   7  -8 -13  119.20   11.10
   7  -8 -13   97.70    4.70
  -7   8  14    1.50    4.70
[truncated: 1,752,241 more chars]
