# Supplementary material for: Platinum(0)-η2-1,2-(E)ditosylethene Complexes Bearing Phosphine, Isocyanide and N-Heterocyclic Carbene Ligands: Synthesis and Cytotoxicity towards Ovarian and Breast Cancer Cells
Source: Molecules. 2024 Mar 1;29(5):1119. doi: 10.3390/molecules29051119 (PMC10934098; doi:10.3390/molecules29051119)
Supplement: Supplementary file 1 [file molecules-29-01119-s001.zip › 6b.cif]

data_NC16

_publ_section_title
;
Platinum - trans-sulfone based organometallic complexes
;
 
_publ_contact_author_name        'Nicola Demitri'
_publ_contact_author_address     
;
Elettra-Sincrotrone Trieste, S.S. 14 Km 163.5 in Area Science Park, 
34149 Basovizza - Trieste, Italy.
;
_publ_contact_author_email       nicola.demitri@elettra.eu
_publ_contact_author_phone       '+39 040 375 8861'
loop_
_publ_author_name
_publ_author_address
'Demitri, Nicola'
;
Elettra-Sincrotrone Trieste, S.S. 14 Km 163.5 in Area Science Park, 
34149 Basovizza-Trieste, Italy.
;
'Visentin, Fabiano'
;
Dipartimento di Scienze Molecolari e Nanosistemi, Universita' Ca' Foscari,
Campus Scientifico - Via Torino 155, 30174 Venezia-Mestre, Italy.
;

_publ_section_abstract
;
The structure of NC16, PtC~38~H~40~N~4~O~4~S~2~, at 100 K has
triclinic (<i>P</i>-1) symmetry. 
;
_publ_contact_letter 
;
Please consider this CIF for publication. I certify that this contibution is the
original work of those listed as authors; that it has not been published
before (in any language or medium) and is not being considered for publication
elsewhere; that all authors concur with and are aware of the submission; that
all workers involved in the study are listed as authors or given proper credit
in the acknowledgements; that I have obtained permission for and acknowledged
the source of any excerpts from other copyright works; and that to the best of
my knowledge the paper contains no statements which are libellous, unlawful or
in any way actionable. All coauthors have made significant scientific
contributions to the work reported, including the ideas and their execution,
and share responsibility and accountability for the results.
;

_audit_creation_method            'SHELXL-2019/3'
_shelx_SHELXL_version_number      '2019/3'
_chemical_name_systematic         ?
_chemical_name_common             ?
_chemical_melting_point           ?
_chemical_formula_moiety
 'C38 H40 N4 O4 Pt S2'
_chemical_formula_sum
 'C38 H40 N4 O4 Pt S2'
_chemical_formula_weight          875.95

loop_
 _atom_type_symbol
 _atom_type_description
 _atom_type_scat_dispersion_real
 _atom_type_scat_dispersion_imag
 _atom_type_scat_source
 'C'  'C'   0.0020   0.0012
 'International Tables Vol C Tables 4.2.6.8 and 6.1.1.4'
 'N'  'N'   0.0042   0.0025
 'International Tables Vol C Tables 4.2.6.8 and 6.1.1.4'
 'O'  'O'   0.0077   0.0045
 'International Tables Vol C Tables 4.2.6.8 and 6.1.1.4'
 'S'  'S'   0.0994   0.0945
 'International Tables Vol C Tables 4.2.6.8 and 6.1.1.4'
 'Pt'  'Pt'  -0.8479   6.7557
 'International Tables Vol C Tables 4.2.6.8 and 6.1.1.4'
 'H'  'H'   0.0000   0.0000
 'International Tables Vol C Tables 4.2.6.8 and 6.1.1.4'
 
_space_group_crystal_system       triclinic
_space_group_IT_number            2
_space_group_name_H-M_alt         'P -1'
_space_group_name_Hall            '-P 1'
 
_shelx_space_group_comment
;
The symmetry employed for this shelxl refinement is uniquely defined
by the following loop, which should always be used as a source of
symmetry information in preference to the above space-group names.
They are only intended as comments.
;
 
loop_
 _space_group_symop_operation_xyz
 'x, y, z'
 '-x, -y, -z'
 
_cell_length_a                    10.808(2)
_cell_length_b                    11.808(2)
_cell_length_c                    15.799(3)
_cell_angle_alpha                 74.17(3)
_cell_angle_beta                  70.02(3)
_cell_angle_gamma                 76.02(3)
_cell_volume                      1798.5(8)
_cell_formula_units_Z             2
_cell_measurement_temperature     100(2)
_cell_measurement_reflns_used     10576
_cell_measurement_theta_min       1.223
_cell_measurement_theta_max       21.000
 
_exptl_crystal_description        'Thin blocks'
_exptl_crystal_colour             'Colourless'
_exptl_crystal_density_meas       ?
_exptl_crystal_density_method     ?
_exptl_crystal_density_diffrn     1.618          
_exptl_crystal_F_000              876
_exptl_transmission_factor_min    ?
_exptl_transmission_factor_max    ?
_exptl_crystal_size_max           0.100
_exptl_crystal_size_mid           0.050
_exptl_crystal_size_min           0.020
_exptl_absorpt_coefficient_mu     2.843
_shelx_estimated_absorpt_T_min    0.764
_shelx_estimated_absorpt_T_max    0.945
_exptl_absorpt_correction_type    none
_exptl_absorpt_correction_T_min   ?
_exptl_absorpt_correction_T_max   ?
_exptl_absorpt_process_details    ?
_exptl_absorpt_special_details    ?
_diffrn_ambient_temperature       100(2)
_diffrn_radiation_wavelength      0.620

_diffrn_measurement_method       'Rotating crystal'
_diffrn_radiation_type           Synchrotron
_diffrn_source                   'Elettra Synchrotron - XRD2 BL'
_diffrn_measurement_device_type  
;
'Arinax MD2s Goniometer, Pilatus 6M detector'
;
_diffrn_detector_area_resol_mean  ?
_diffrn_reflns_number             17625
_diffrn_reflns_av_unetI/netI      0.0512
_diffrn_reflns_av_R_equivalents   0.0476
_diffrn_reflns_limit_h_min        -12
_diffrn_reflns_limit_h_max        12
_diffrn_reflns_limit_k_min        -13
_diffrn_reflns_limit_k_max        13
_diffrn_reflns_limit_l_min        -18
_diffrn_reflns_limit_l_max        18
_diffrn_reflns_theta_min          1.223
_diffrn_reflns_theta_max          21.000
_diffrn_reflns_theta_full         21.000
_diffrn_measured_fraction_theta_max   0.983
_diffrn_measured_fraction_theta_full  0.983
_diffrn_reflns_Laue_measured_fraction_max    0.983
_diffrn_reflns_Laue_measured_fraction_full   0.983
_diffrn_reflns_point_group_measured_fraction_max   0.983
_diffrn_reflns_point_group_measured_fraction_full  0.983
_reflns_number_total              5731
_reflns_number_gt                 5440
_reflns_threshold_expression      'I > 2\s(I)'
_reflns_Friedel_coverage          0.000
_reflns_Friedel_fraction_max      .
_reflns_Friedel_fraction_full     .
 
_reflns_special_details
;
 Reflections were merged by SHELXL according to the crystal
 class for the calculation of statistics and refinement.
 
 _reflns_Friedel_fraction is defined as the number of unique
 Friedel pairs measured divided by the number that would be
 possible theoretically, ignoring centric projections and
 systematic absences.
;

_diffrn_standards_number 0
_diffrn_standards_interval_count 0
_diffrn_standards_decay_% 0
 
_computing_data_collection       'Elettra XRD2 Data Collection SW'
_computing_cell_refinement       'XDS (Kabsch, 2010)'
_computing_data_reduction        'XDS (Kabsch, 2010)'
_computing_structure_solution    'SHELXT (Sheldrick, 2015)'
_computing_structure_refinement 'SHELXL-2019/3 (Sheldrick, 2015)'
_computing_molecular_graphics    'Ortep3 for Windows - Coot'
_computing_publication_material  'enCIFer - publCIF'
 
_refine_special_details
;
Hydrogen atoms were included at calculated positions with isotropic 
Ufactors=1.2Ueq or Ufactors=1.5Ueq for methyl groups. Anisotropic thermal
motion modeling has been applied to all atoms.
;

_refine_ls_structure_factor_coef  Fsqd
_refine_ls_matrix_type            full
_refine_ls_weighting_scheme       calc
_refine_ls_weighting_details
'w=1/[\s^2^(Fo^2^)+(0.0089P)^2^+2.6405P] where P=(Fo^2^+2Fc^2^)/3'
_atom_sites_solution_primary      direct
_atom_sites_solution_secondary    difmap
_atom_sites_solution_hydrogens    geom
_refine_ls_hydrogen_treatment     constr
_refine_ls_extinction_method      none
_refine_ls_extinction_coef        .
_refine_ls_number_reflns          5731
_refine_ls_number_parameters      446
_refine_ls_number_restraints      0
_refine_ls_R_factor_all           0.0298
_refine_ls_R_factor_gt            0.0260
_refine_ls_wR_factor_ref          0.0636
_refine_ls_wR_factor_gt           0.0627
_refine_ls_goodness_of_fit_ref    1.074
_refine_ls_restrained_S_all       1.074
_refine_ls_shift/su_max           0.023
_refine_ls_shift/su_mean          0.000
 
loop_
 _atom_site_label
 _atom_site_type_symbol
 _atom_site_fract_x
 _atom_site_fract_y
 _atom_site_fract_z
 _atom_site_U_iso_or_equiv
 _atom_site_adp_type
 _atom_site_occupancy
 _atom_site_site_symmetry_order  
 _atom_site_calc_flag
 _atom_site_refinement_flags_posn
 _atom_site_refinement_flags_adp
 _atom_site_refinement_flags_occupancy
 _atom_site_disorder_assembly
 _atom_site_disorder_group
C8_2 C 0.3683(5) 0.1360(5) 0.0662(3) 0.0450(12) Uani 1 1 d . . . . .
H8_2 H 0.389173 0.214364 0.048344 0.054 Uiso 1 1 calc R U . . .
C7_2 C 0.3157(5) 0.0954(5) 0.0128(3) 0.0509(14) Uani 1 1 d . . . . .
H7_2 H 0.301781 0.147421 -0.041871 0.061 Uiso 1 1 calc R U . . .
C6_2 C 0.2837(5) -0.0154(5) 0.0359(3) 0.0418(12) Uani 1 1 d . . . . .
C9_2 C 0.2230(5) -0.0551(6) -0.0221(4) 0.0581(16) Uani 1 1 d . . . . .
H9A_2 H 0.129348 -0.017074 -0.011710 0.087 Uiso 1 1 calc R U . . .
H9B_2 H 0.228283 -0.142015 -0.004919 0.087 Uiso 1 1 calc R U . . .
H9C_2 H 0.272028 -0.031957 -0.087331 0.087 Uiso 1 1 calc R U . . .
C5_2 C 0.3066(5) -0.0917(4) 0.1152(3) 0.0368(10) Uani 1 1 d . . . . .
H5_2 H 0.286205 -0.170205 0.132309 0.044 Uiso 1 1 calc R U . . .
C4_2 C 0.3592(4) -0.0536(4) 0.1699(3) 0.0288(9) Uani 1 1 d . . . . .
H4_2 H 0.374404 -0.106233 0.224065 0.035 Uiso 1 1 calc R U . . .
C3_2 C 0.3894(4) 0.0601(4) 0.1456(3) 0.0269(9) Uani 1 1 d . . . . .
S1_2 S 0.45164(9) 0.10881(9) 0.21781(7) 0.0247(2) Uani 1 1 d . . . . .
O1_2 O 0.5400(3) 0.0079(3) 0.25333(19) 0.0284(6) Uani 1 1 d . . . . .
O2_2 O 0.5049(3) 0.2158(3) 0.1647(2) 0.0368(7) Uani 1 1 d . . . . .
C1_2 C 0.3146(4) 0.1419(3) 0.3103(3) 0.0224(8) Uani 1 1 d . . . . .
H1_2 H 0.277866 0.072043 0.356299 0.027 Uiso 1 1 calc R U . . .
C2_2 C 0.2151(4) 0.2481(3) 0.2890(3) 0.0233(8) Uani 1 1 d . . . . .
H2_2 H 0.234389 0.290805 0.222978 0.028 Uiso 1 1 calc R U . . .
S2_2 S 0.04956(9) 0.23245(8) 0.34619(6) 0.01978(19) Uani 1 1 d . . . . .
O4_2 O -0.0347(3) 0.3429(2) 0.3194(2) 0.0283(6) Uani 1 1 d . . . . .
O3_2 O 0.0304(3) 0.1854(2) 0.44380(18) 0.0273(6) Uani 1 1 d . . . . .
C10_2 C 0.0170(3) 0.1206(3) 0.3044(2) 0.0187(7) Uani 1 1 d . . . . .
C15_2 C -0.0014(4) 0.1476(4) 0.2179(3) 0.0238(8) Uani 1 1 d . . . . .
H15_2 H 0.004492 0.225332 0.180457 0.029 Uiso 1 1 calc R U . . .
C14_2 C -0.0285(4) 0.0599(4) 0.1866(3) 0.0276(9) Uani 1 1 d . . . . .
H14_2 H -0.042674 0.078395 0.127851 0.033 Uiso 1 1 calc R U . . .
C13_2 C -0.0352(4) -0.0555(4) 0.2406(3) 0.0266(9) Uani 1 1 d . . . . .
C16_2 C -0.0653(5) -0.1512(5) 0.2067(4) 0.0447(12) Uani 1 1 d . . . . .
H16A_2 H -0.006793 -0.153861 0.144007 0.067 Uiso 1 1 calc R U . . .
H16B_2 H -0.158632 -0.132760 0.206595 0.067 Uiso 1 1 calc R U . . .
H16C_2 H -0.049811 -0.228806 0.247449 0.067 Uiso 1 1 calc R U . . .
C12_2 C -0.0150(4) -0.0801(4) 0.3260(3) 0.0249(8) Uani 1 1 d . . . . .
H12_2 H -0.019282 -0.158041 0.363331 0.030 Uiso 1 1 calc R U . . .
C11_2 C 0.0114(3) 0.0072(3) 0.3583(3) 0.0202(8) Uani 1 1 d . . . . .
H11_2 H 0.025505 -0.011070 0.417006 0.024 Uiso 1 1 calc R U . . .
Pt_1 Pt 0.32442(2) 0.28011(2) 0.36318(2) 0.02026(7) Uani 1 1 d . . . . .
C5_4 C 0.2819(4) 0.5645(4) 0.1481(3) 0.0303(9) Uani 1 1 d . . . . .
C6_4 C 0.3399(5) 0.6036(5) 0.0535(3) 0.0500(14) Uani 1 1 d . . . . .
H6_4 H 0.428827 0.619328 0.031588 0.060 Uiso 1 1 calc R U . . .
C7_4 C 0.2704(6) 0.6193(6) -0.0079(4) 0.0651(18) Uani 1 1 d . . . . .
H7_4 H 0.311909 0.644014 -0.071907 0.078 Uiso 1 1 calc R U . . .
C8_4 C 0.1394(6) 0.5991(6) 0.0232(4) 0.0578(15) Uani 1 1 d . . . . .
H8_4 H 0.090323 0.611893 -0.019261 0.069 Uiso 1 1 calc R U . . .
C9_4 C 0.0811(5) 0.5605(4) 0.1158(3) 0.0402(11) Uani 1 1 d . . . . .
H9_4 H -0.008114 0.545474 0.137185 0.048 Uiso 1 1 calc R U . . .
C10_4 C 0.1514(4) 0.5435(4) 0.1779(3) 0.0316(9) Uani 1 1 d . . . . .
H10_4 H 0.109858 0.517162 0.241780 0.038 Uiso 1 1 calc R U . . .
C4_4 C 0.3658(4) 0.5393(4) 0.2120(3) 0.0309(9) Uani 1 1 d . . . . .
H4A_4 H 0.419103 0.458357 0.211261 0.037 Uiso 1 1 calc R U . . .
H4B_4 H 0.428980 0.596907 0.188420 0.037 Uiso 1 1 calc R U . . .
N1_4 N 0.2891(3) 0.5464(3) 0.3071(2) 0.0260(7) Uani 1 1 d . . . . .
C1_4 C 0.2693(4) 0.4502(3) 0.3780(3) 0.0237(8) Uani 1 1 d . . . . .
C2_4 C 0.2318(4) 0.6520(4) 0.3378(3) 0.0289(9) Uani 1 1 d . . . . .
H2_4 H 0.232126 0.730525 0.301190 0.035 Uiso 1 1 calc R U . . .
C3_4 C 0.1765(4) 0.6224(4) 0.4283(3) 0.0293(9) Uani 1 1 d . . . . .
H3_4 H 0.129848 0.675961 0.468432 0.035 Uiso 1 1 calc R U . . .
N2_4 N 0.1996(3) 0.4989(3) 0.4531(2) 0.0259(7) Uani 1 1 d . . . . .
C11_4 C 0.1565(4) 0.4300(4) 0.5468(3) 0.0313(9) Uani 1 1 d . . . . .
H11A_4 H 0.128616 0.357480 0.545733 0.047 Uiso 1 1 calc R U . . .
H11B_4 H 0.081378 0.478055 0.584021 0.047 Uiso 1 1 calc R U . . .
H11C_4 H 0.230610 0.408032 0.573684 0.047 Uiso 1 1 calc R U . . .
C5_3 C 0.6422(4) 0.4461(4) 0.2986(3) 0.0240(8) Uani 1 1 d . . . . .
C6_3 C 0.7128(4) 0.5138(4) 0.2192(3) 0.0353(10) Uani 1 1 d . . . . .
H6_3 H 0.771430 0.476566 0.170577 0.042 Uiso 1 1 calc R U . . .
C7_3 C 0.6989(5) 0.6364(4) 0.2096(4) 0.0427(11) Uani 1 1 d . . . . .
H7_3 H 0.747679 0.682255 0.154133 0.051 Uiso 1 1 calc R U . . .
C8_3 C 0.6157(5) 0.6921(4) 0.2792(4) 0.0397(11) Uani 1 1 d . . . . .
H8_3 H 0.605690 0.776028 0.271954 0.048 Uiso 1 1 calc R U . . .
C9_3 C 0.5468(4) 0.6242(4) 0.3597(3) 0.0337(10) Uani 1 1 d . . . . .
H9_3 H 0.490128 0.661658 0.408707 0.040 Uiso 1 1 calc R U . . .
C10_3 C 0.5594(4) 0.5019(4) 0.3700(3) 0.0283(9) Uani 1 1 d . . . . .
H10_3 H 0.511409 0.456117 0.425828 0.034 Uiso 1 1 calc R U . . .
C4_3 C 0.6547(4) 0.3141(4) 0.3037(3) 0.0271(9) Uani 1 1 d . . . . .
H4A_3 H 0.611093 0.304163 0.260897 0.033 Uiso 1 1 calc R U . . .
H4B_3 H 0.750497 0.280292 0.282213 0.033 Uiso 1 1 calc R U . . .
N1_3 N 0.5965(3) 0.2462(3) 0.3950(2) 0.0242(7) Uani 1 1 d . . . . .
C1_3 C 0.4677(4) 0.2278(3) 0.4274(3) 0.0214(8) Uani 1 1 d . . . . .
C2_3 C 0.6644(4) 0.1896(4) 0.4593(3) 0.0272(9) Uani 1 1 d . . . . .
H2_3 H 0.755103 0.189865 0.452569 0.033 Uiso 1 1 calc R U . . .
C3_3 C 0.5773(4) 0.1343(4) 0.5329(3) 0.0287(9) Uani 1 1 d . . . . .
H3_3 H 0.594380 0.087999 0.588408 0.034 Uiso 1 1 calc R U . . .
N2_3 N 0.4576(3) 0.1577(3) 0.5124(2) 0.0226(7) Uani 1 1 d . . . . .
C11_3 C 0.3363(4) 0.1123(4) 0.5733(3) 0.0284(9) Uani 1 1 d . . . . .
H11A_3 H 0.287828 0.164269 0.617240 0.043 Uiso 1 1 calc R U . . .
H11B_3 H 0.359937 0.031272 0.606959 0.043 Uiso 1 1 calc R U . . .
H11C_3 H 0.279681 0.110928 0.536768 0.043 Uiso 1 1 calc R U . . .
 
loop_
 _atom_site_aniso_label
 _atom_site_aniso_U_11
 _atom_site_aniso_U_22
 _atom_site_aniso_U_33
 _atom_site_aniso_U_23
 _atom_site_aniso_U_13
 _atom_site_aniso_U_12
C8_2 0.037(3) 0.045(3) 0.037(3) 0.006(2) -0.003(2) -0.006(2)
C7_2 0.041(3) 0.076(4) 0.020(2) 0.005(2) -0.009(2) 0.000(3)
C6_2 0.026(2) 0.068(4) 0.020(2) -0.014(2) 0.0029(18) 0.004(2)
C9_2 0.036(3) 0.102(5) 0.036(3) -0.031(3) -0.012(2) 0.010(3)
C5_2 0.033(3) 0.044(3) 0.034(2) -0.019(2) -0.010(2) 0.004(2)
C4_2 0.027(2) 0.033(2) 0.026(2) -0.0103(17) -0.0064(17) 0.0005(18)
C3_2 0.015(2) 0.033(2) 0.0210(19) -0.0046(16) 0.0054(15) 0.0016(17)
S1_2 0.0130(5) 0.0227(5) 0.0297(5) -0.0077(4) 0.0075(4) -0.0046(4)
O1_2 0.0192(14) 0.0312(15) 0.0320(15) -0.0100(12) -0.0019(12) -0.0036(12)
O2_2 0.0215(16) 0.0277(16) 0.0464(18) -0.0041(13) 0.0103(13) -0.0107(13)
C1_2 0.0144(19) 0.0171(18) 0.027(2) -0.0028(15) 0.0042(15) -0.0047(15)
C2_2 0.0155(19) 0.0214(19) 0.028(2) -0.0063(16) 0.0007(16) -0.0036(16)
S2_2 0.0110(4) 0.0198(5) 0.0239(5) -0.0071(4) 0.0038(3) -0.0044(4)
O4_2 0.0163(14) 0.0202(14) 0.0410(17) -0.0078(12) 0.0008(12) -0.0014(11)
O3_2 0.0267(15) 0.0315(15) 0.0217(14) -0.0095(12) 0.0041(11) -0.0131(12)
C10_2 0.0090(17) 0.0220(19) 0.0197(18) -0.0063(15) 0.0049(14) -0.0037(14)
C15_2 0.0156(19) 0.024(2) 0.023(2) -0.0024(16) 0.0006(15) -0.0001(15)
C14_2 0.020(2) 0.040(2) 0.023(2) -0.0114(18) -0.0042(16) -0.0024(18)
C13_2 0.0138(19) 0.032(2) 0.032(2) -0.0133(18) 0.0004(16) -0.0040(17)
C16_2 0.044(3) 0.047(3) 0.048(3) -0.020(2) -0.009(2) -0.014(2)
C12_2 0.0124(19) 0.024(2) 0.030(2) -0.0062(16) 0.0047(15) -0.0037(16)
C11_2 0.0103(18) 0.026(2) 0.0202(18) -0.0048(15) 0.0014(14) -0.0040(15)
Pt_1 0.00983(9) 0.01587(9) 0.03070(10) -0.00782(6) 0.00342(6) -0.00448(6)
C5_4 0.026(2) 0.024(2) 0.036(2) -0.0130(18) 0.0067(18) -0.0115(17)
C6_4 0.042(3) 0.074(4) 0.036(3) -0.024(3) 0.016(2) -0.039(3)
C7_4 0.071(4) 0.104(5) 0.029(3) -0.018(3) 0.006(3) -0.057(4)
C8_4 0.065(4) 0.083(4) 0.036(3) -0.015(3) -0.008(3) -0.041(3)
C9_4 0.030(3) 0.045(3) 0.046(3) -0.014(2) -0.001(2) -0.018(2)
C10_4 0.024(2) 0.028(2) 0.034(2) -0.0072(18) 0.0036(18) -0.0062(18)
C4_4 0.018(2) 0.028(2) 0.040(2) -0.0107(18) 0.0029(17) -0.0026(17)
N1_4 0.0155(17) 0.0200(17) 0.038(2) -0.0071(14) -0.0023(14) -0.0026(13)
C1_4 0.0091(18) 0.0202(19) 0.038(2) -0.0063(17) -0.0032(16) -0.0009(15)
C2_4 0.019(2) 0.0171(19) 0.048(3) -0.0082(18) -0.0057(18) -0.0035(16)
C3_4 0.023(2) 0.025(2) 0.042(3) -0.0157(18) -0.0063(18) -0.0009(17)
N2_4 0.0136(16) 0.0234(17) 0.038(2) -0.0122(15) -0.0020(14) -0.0006(13)
C11_4 0.026(2) 0.029(2) 0.035(2) -0.0093(18) -0.0046(18) -0.0019(18)
C5_3 0.0123(19) 0.024(2) 0.035(2) -0.0067(17) -0.0044(16) -0.0058(16)
C6_3 0.024(2) 0.036(2) 0.041(3) -0.006(2) -0.0007(19) -0.0097(19)
C7_3 0.036(3) 0.032(2) 0.052(3) 0.009(2) -0.008(2) -0.017(2)
C8_3 0.030(2) 0.022(2) 0.070(3) -0.003(2) -0.021(2) -0.0068(19)
C9_3 0.024(2) 0.029(2) 0.051(3) -0.015(2) -0.011(2) -0.0026(18)
C10_3 0.019(2) 0.025(2) 0.040(2) -0.0087(18) -0.0043(17) -0.0069(17)
C4_3 0.015(2) 0.026(2) 0.033(2) -0.0115(17) 0.0078(16) -0.0057(16)
N1_3 0.0126(16) 0.0186(16) 0.0353(19) -0.0091(14) 0.0032(14) -0.0028(13)
C1_3 0.0102(18) 0.0169(18) 0.036(2) -0.0123(16) -0.0008(15) -0.0013(14)
C2_3 0.0116(19) 0.029(2) 0.039(2) -0.0141(18) -0.0008(17) -0.0007(16)
C3_3 0.021(2) 0.023(2) 0.039(2) -0.0103(18) -0.0036(18) -0.0015(17)
N2_3 0.0145(16) 0.0176(15) 0.0312(18) -0.0054(13) 0.0001(13) -0.0037(13)
C11_3 0.020(2) 0.023(2) 0.038(2) -0.0064(17) -0.0002(17) -0.0081(17)
 
_geom_special_details
;
 All esds (except the esd in the dihedral angle between two l.s. planes)
 are estimated using the full covariance matrix.  The cell esds are taken
 into account individually in the estimation of esds in distances, angles
 and torsion angles; correlations between esds in cell parameters are only
 used when they are defined by crystal symmetry.  An approximate (isotropic)
 treatment of cell esds is used for estimating esds involving l.s. planes.
;
 
loop_
 _geom_bond_atom_site_label_1
 _geom_bond_atom_site_label_2
 _geom_bond_distance
 _geom_bond_site_symmetry_2
 _geom_bond_publ_flag
C8_2 C3_2 1.383(6) . ?
C8_2 C7_2 1.394(8) . ?
C8_2 H8_2 0.9500 . ?
C7_2 C6_2 1.355(8) . ?
C7_2 H7_2 0.9500 . ?
C6_2 C5_2 1.390(7) . ?
C6_2 C9_2 1.511(7) . ?
C9_2 H9A_2 0.9800 . ?
C9_2 H9B_2 0.9800 . ?
C9_2 H9C_2 0.9800 . ?
C5_2 C4_2 1.394(6) . ?
C5_2 H5_2 0.9500 . ?
C4_2 C3_2 1.379(6) . ?
C4_2 H4_2 0.9500 . ?
C3_2 S1_2 1.775(4) . ?
S1_2 O2_2 1.440(3) . ?
S1_2 O1_2 1.449(3) . ?
S1_2 C1_2 1.742(4) . ?
C1_2 C2_2 1.486(5) . ?
C1_2 Pt_1 2.064(4) . ?
C1_2 H1_2 1.0000 . ?
C2_2 S2_2 1.737(4) . ?
C2_2 Pt_1 2.078(4) . ?
C2_2 H2_2 1.0000 . ?
S2_2 O4_2 1.448(3) . ?
S2_2 O3_2 1.449(3) . ?
S2_2 C10_2 1.778(4) . ?
C10_2 C11_2 1.380(5) . ?
C10_2 C15_2 1.388(5) . ?
C15_2 C14_2 1.388(6) . ?
C15_2 H15_2 0.9500 . ?
C14_2 C13_2 1.401(6) . ?
C14_2 H14_2 0.9500 . ?
C13_2 C12_2 1.381(6) . ?
C13_2 C16_2 1.516(6) . ?
C16_2 H16A_2 0.9800 . ?
C16_2 H16B_2 0.9800 . ?
C16_2 H16C_2 0.9800 . ?
C12_2 C11_2 1.390(5) . ?
C12_2 H12_2 0.9500 . ?
C11_2 H11_2 0.9500 . ?
Pt_1 C1_4 2.007(4) . ?
Pt_1 C1_3 2.020(4) . ?
C5_4 C10_4 1.388(6) . ?
C5_4 C6_4 1.401(6) . ?
C5_4 C4_4 1.504(6) . ?
C6_4 C7_4 1.367(8) . ?
C6_4 H6_4 0.9500 . ?
C7_4 C8_4 1.388(8) . ?
C7_4 H7_4 0.9500 . ?
C8_4 C9_4 1.375(7) . ?
C8_4 H8_4 0.9500 . ?
C9_4 C10_4 1.382(7) . ?
C9_4 H9_4 0.9500 . ?
C10_4 H10_4 0.9500 . ?
C4_4 N1_4 1.462(5) . ?
C4_4 H4A_4 0.9900 . ?
C4_4 H4B_4 0.9900 . ?
N1_4 C1_4 1.360(5) . ?
N1_4 C2_4 1.388(5) . ?
C1_4 N2_4 1.363(5) . ?
C2_4 C3_4 1.329(6) . ?
C2_4 H2_4 0.9500 . ?
C3_4 N2_4 1.386(5) . ?
C3_4 H3_4 0.9500 . ?
N2_4 C11_4 1.458(6) . ?
C11_4 H11A_4 0.9800 . ?
C11_4 H11B_4 0.9800 . ?
C11_4 H11C_4 0.9800 . ?
C5_3 C6_3 1.374(6) . ?
C5_3 C10_3 1.392(6) . ?
C5_3 C4_3 1.514(5) . ?
C6_3 C7_3 1.390(7) . ?
C6_3 H6_3 0.9500 . ?
C7_3 C8_3 1.372(7) . ?
C7_3 H7_3 0.9500 . ?
C8_3 C9_3 1.378(7) . ?
C8_3 H8_3 0.9500 . ?
C9_3 C10_3 1.387(6) . ?
C9_3 H9_3 0.9500 . ?
C10_3 H10_3 0.9500 . ?
C4_3 N1_3 1.453(5) . ?
C4_3 H4A_3 0.9900 . ?
C4_3 H4B_3 0.9900 . ?
N1_3 C1_3 1.359(5) . ?
N1_3 C2_3 1.386(5) . ?
C1_3 N2_3 1.355(5) . ?
C2_3 C3_3 1.342(6) . ?
C2_3 H2_3 0.9500 . ?
C3_3 N2_3 1.385(5) . ?
C3_3 H3_3 0.9500 . ?
N2_3 C11_3 1.459(5) . ?
C11_3 H11A_3 0.9800 . ?
C11_3 H11B_3 0.9800 . ?
C11_3 H11C_3 0.9800 . ?
 
loop_
 _geom_angle_atom_site_label_1
 _geom_angle_atom_site_label_2
 _geom_angle_atom_site_label_3
 _geom_angle
 _geom_angle_site_symmetry_1
 _geom_angle_site_symmetry_3
 _geom_angle_publ_flag
C3_2 C8_2 C7_2 118.8(5) . . ?
C3_2 C8_2 H8_2 120.6 . . ?
C7_2 C8_2 H8_2 120.6 . . ?
C6_2 C7_2 C8_2 122.6(5) . . ?
C6_2 C7_2 H7_2 118.7 . . ?
C8_2 C7_2 H7_2 118.7 . . ?
C7_2 C6_2 C5_2 118.3(5) . . ?
C7_2 C6_2 C9_2 121.2(5) . . ?
C5_2 C6_2 C9_2 120.6(5) . . ?
C6_2 C9_2 H9A_2 109.5 . . ?
C6_2 C9_2 H9B_2 109.5 . . ?
H9A_2 C9_2 H9B_2 109.5 . . ?
C6_2 C9_2 H9C_2 109.5 . . ?
H9A_2 C9_2 H9C_2 109.5 . . ?
H9B_2 C9_2 H9C_2 109.5 . . ?
C6_2 C5_2 C4_2 120.4(5) . . ?
C6_2 C5_2 H5_2 119.8 . . ?
C4_2 C5_2 H5_2 119.8 . . ?
C3_2 C4_2 C5_2 120.3(4) . . ?
C3_2 C4_2 H4_2 119.9 . . ?
C5_2 C4_2 H4_2 119.9 . . ?
C4_2 C3_2 C8_2 119.6(4) . . ?
C4_2 C3_2 S1_2 119.7(3) . . ?
C8_2 C3_2 S1_2 120.6(4) . . ?
O2_2 S1_2 O1_2 118.60(18) . . ?
O2_2 S1_2 C1_2 109.98(18) . . ?
O1_2 S1_2 C1_2 107.67(18) . . ?
O2_2 S1_2 C3_2 106.7(2) . . ?
O1_2 S1_2 C3_2 107.06(18) . . ?
C1_2 S1_2 C3_2 106.18(18) . . ?
C2_2 C1_2 S1_2 116.1(3) . . ?
C2_2 C1_2 Pt_1 69.5(2) . . ?
S1_2 C1_2 Pt_1 114.59(19) . . ?
C2_2 C1_2 H1_2 116.2 . . ?
S1_2 C1_2 H1_2 116.2 . . ?
Pt_1 C1_2 H1_2 116.2 . . ?
C1_2 C2_2 S2_2 115.1(3) . . ?
C1_2 C2_2 Pt_1 68.5(2) . . ?
S2_2 C2_2 Pt_1 117.3(2) . . ?
C1_2 C2_2 H2_2 115.9 . . ?
S2_2 C2_2 H2_2 115.9 . . ?
Pt_1 C2_2 H2_2 115.9 . . ?
O4_2 S2_2 O3_2 117.46(17) . . ?
O4_2 S2_2 C2_2 108.60(18) . . ?
O3_2 S2_2 C2_2 110.85(18) . . ?
O4_2 S2_2 C10_2 107.41(17) . . ?
O3_2 S2_2 C10_2 105.59(17) . . ?
C2_2 S2_2 C10_2 106.29(17) . . ?
C11_2 C10_2 C15_2 120.6(3) . . ?
C11_2 C10_2 S2_2 119.5(3) . . ?
C15_2 C10_2 S2_2 120.0(3) . . ?
C10_2 C15_2 C14_2 119.4(4) . . ?
C10_2 C15_2 H15_2 120.3 . . ?
C14_2 C15_2 H15_2 120.3 . . ?
C15_2 C14_2 C13_2 120.7(4) . . ?
C15_2 C14_2 H14_2 119.6 . . ?
C13_2 C14_2 H14_2 119.6 . . ?
C12_2 C13_2 C14_2 118.7(4) . . ?
C12_2 C13_2 C16_2 120.6(4) . . ?
C14_2 C13_2 C16_2 120.7(4) . . ?
C13_2 C16_2 H16A_2 109.5 . . ?
C13_2 C16_2 H16B_2 109.5 . . ?
H16A_2 C16_2 H16B_2 109.5 . . ?
C13_2 C16_2 H16C_2 109.5 . . ?
H16A_2 C16_2 H16C_2 109.5 . . ?
H16B_2 C16_2 H16C_2 109.5 . . ?
C13_2 C12_2 C11_2 121.1(4) . . ?
C13_2 C12_2 H12_2 119.4 . . ?
C11_2 C12_2 H12_2 119.4 . . ?
C10_2 C11_2 C12_2 119.6(4) . . ?
C10_2 C11_2 H11_2 120.2 . . ?
C12_2 C11_2 H11_2 120.2 . . ?
C1_4 Pt_1 C1_3 99.24(15) . . ?
C1_4 Pt_1 C1_2 151.12(16) . . ?
C1_3 Pt_1 C1_2 109.47(15) . . ?
C1_4 Pt_1 C2_2 109.19(15) . . ?
C1_3 Pt_1 C2_2 151.51(14) . . ?
C1_2 Pt_1 C2_2 42.05(15) . . ?
C10_4 C5_4 C6_4 118.1(4) . . ?
C10_4 C5_4 C4_4 122.8(4) . . ?
C6_4 C5_4 C4_4 119.0(4) . . ?
C7_4 C6_4 C5_4 121.0(5) . . ?
C7_4 C6_4 H6_4 119.5 . . ?
C5_4 C6_4 H6_4 119.5 . . ?
C6_4 C7_4 C8_4 120.2(5) . . ?
C6_4 C7_4 H7_4 119.9 . . ?
C8_4 C7_4 H7_4 119.9 . . ?
C9_4 C8_4 C7_4 119.5(5) . . ?
C9_4 C8_4 H8_4 120.2 . . ?
C7_4 C8_4 H8_4 120.2 . . ?
C8_4 C9_4 C10_4 120.4(4) . . ?
C8_4 C9_4 H9_4 119.8 . . ?
C10_4 C9_4 H9_4 119.8 . . ?
C9_4 C10_4 C5_4 120.7(4) . . ?
C9_4 C10_4 H10_4 119.6 . . ?
C5_4 C10_4 H10_4 119.6 . . ?
N1_4 C4_4 C5_4 114.1(3) . . ?
N1_4 C4_4 H4A_4 108.7 . . ?
C5_4 C4_4 H4A_4 108.7 . . ?
N1_4 C4_4 H4B_4 108.7 . . ?
C5_4 C4_4 H4B_4 108.7 . . ?
H4A_4 C4_4 H4B_4 107.6 . . ?
C1_4 N1_4 C2_4 111.0(3) . . ?
C1_4 N1_4 C4_4 124.4(3) . . ?
C2_4 N1_4 C4_4 124.6(3) . . ?
N1_4 C1_4 N2_4 104.0(3) . . ?
N1_4 C1_4 Pt_1 124.2(3) . . ?
N2_4 C1_4 Pt_1 131.7(3) . . ?
C3_4 C2_4 N1_4 107.0(4) . . ?
C3_4 C2_4 H2_4 126.5 . . ?
N1_4 C2_4 H2_4 126.5 . . ?
C2_4 C3_4 N2_4 107.3(3) . . ?
C2_4 C3_4 H3_4 126.4 . . ?
N2_4 C3_4 H3_4 126.4 . . ?
C1_4 N2_4 C3_4 110.8(3) . . ?
C1_4 N2_4 C11_4 124.3(3) . . ?
C3_4 N2_4 C11_4 124.9(3) . . ?
N2_4 C11_4 H11A_4 109.5 . . ?
N2_4 C11_4 H11B_4 109.5 . . ?
H11A_4 C11_4 H11B_4 109.5 . . ?
N2_4 C11_4 H11C_4 109.5 . . ?
H11A_4 C11_4 H11C_4 109.5 . . ?
H11B_4 C11_4 H11C_4 109.5 . . ?
C6_3 C5_3 C10_3 118.9(4) . . ?
C6_3 C5_3 C4_3 118.4(4) . . ?
C10_3 C5_3 C4_3 122.6(4) . . ?
C5_3 C6_3 C7_3 120.4(4) . . ?
C5_3 C6_3 H6_3 119.8 . . ?
C7_3 C6_3 H6_3 119.8 . . ?
C8_3 C7_3 C6_3 120.9(4) . . ?
C8_3 C7_3 H7_3 119.6 . . ?
C6_3 C7_3 H7_3 119.6 . . ?
C7_3 C8_3 C9_3 118.9(4) . . ?
C7_3 C8_3 H8_3 120.5 . . ?
C9_3 C8_3 H8_3 120.5 . . ?
C8_3 C9_3 C10_3 120.8(4) . . ?
C8_3 C9_3 H9_3 119.6 . . ?
C10_3 C9_3 H9_3 119.6 . . ?
C9_3 C10_3 C5_3 120.1(4) . . ?
C9_3 C10_3 H10_3 120.0 . . ?
C5_3 C10_3 H10_3 120.0 . . ?
N1_3 C4_3 C5_3 114.4(3) . . ?
N1_3 C4_3 H4A_3 108.7 . . ?
C5_3 C4_3 H4A_3 108.7 . . ?
N1_3 C4_3 H4B_3 108.7 . . ?
C5_3 C4_3 H4B_3 108.7 . . ?
H4A_3 C4_3 H4B_3 107.6 . . ?
C1_3 N1_3 C2_3 111.1(3) . . ?
C1_3 N1_3 C4_3 123.8(3) . . ?
C2_3 N1_3 C4_3 125.1(3) . . ?
N2_3 C1_3 N1_3 104.2(3) . . ?
N2_3 C1_3 Pt_1 126.5(3) . . ?
N1_3 C1_3 Pt_1 129.1(3) . . ?
C3_3 C2_3 N1_3 106.7(4) . . ?
C3_3 C2_3 H2_3 126.6 . . ?
N1_3 C2_3 H2_3 126.6 . . ?
C2_3 C3_3 N2_3 106.8(4) . . ?
C2_3 C3_3 H3_3 126.6 . . ?
N2_3 C3_3 H3_3 126.6 . . ?
C1_3 N2_3 C3_3 111.2(3) . . ?
C1_3 N2_3 C11_3 124.0(3) . . ?
C3_3 N2_3 C11_3 124.8(3) . . ?
N2_3 C11_3 H11A_3 109.5 . . ?
N2_3 C11_3 H11B_3 109.5 . . ?
H11A_3 C11_3 H11B_3 109.5 . . ?
N2_3 C11_3 H11C_3 109.5 . . ?
H11A_3 C11_3 H11C_3 109.5 . . ?
H11B_3 C11_3 H11C_3 109.5 . . ?
 
loop_
 _geom_torsion_atom_site_label_1
 _geom_torsion_atom_site_label_2
 _geom_torsion_atom_site_label_3
 _geom_torsion_atom_site_label_4
 _geom_torsion
 _geom_torsion_site_symmetry_1
 _geom_torsion_site_symmetry_2
 _geom_torsion_site_symmetry_3
 _geom_torsion_site_symmetry_4
 _geom_torsion_publ_flag
C3_2 C8_2 C7_2 C6_2 0.4(8) . . . . ?
C8_2 C7_2 C6_2 C5_2 -1.1(7) . . . . ?
C8_2 C7_2 C6_2 C9_2 178.1(5) . . . . ?
C7_2 C6_2 C5_2 C4_2 0.9(7) . . . . ?
C9_2 C6_2 C5_2 C4_2 -178.2(4) . . . . ?
C6_2 C5_2 C4_2 C3_2 -0.1(6) . . . . ?
C5_2 C4_2 C3_2 C8_2 -0.6(6) . . . . ?
C5_2 C4_2 C3_2 S1_2 178.1(3) . . . . ?
C7_2 C8_2 C3_2 C4_2 0.5(7) . . . . ?
C7_2 C8_2 C3_2 S1_2 -178.2(4) . . . . ?
C4_2 C3_2 S1_2 O2_2 165.7(3) . . . . ?
C8_2 C3_2 S1_2 O2_2 -15.7(4) . . . . ?
C4_2 C3_2 S1_2 O1_2 37.8(4) . . . . ?
C8_2 C3_2 S1_2 O1_2 -143.6(4) . . . . ?
C4_2 C3_2 S1_2 C1_2 -77.0(3) . . . . ?
C8_2 C3_2 S1_2 C1_2 101.6(4) . . . . ?
O2_2 S1_2 C1_2 C2_2 46.0(3) . . . . ?
O1_2 S1_2 C1_2 C2_2 176.6(3) . . . . ?
C3_2 S1_2 C1_2 C2_2 -69.0(3) . . . . ?
O2_2 S1_2 C1_2 Pt_1 -32.1(3) . . . . ?
O1_2 S1_2 C1_2 Pt_1 98.4(2) . . . . ?
C3_2 S1_2 C1_2 Pt_1 -147.2(2) . . . . ?
S1_2 C1_2 C2_2 S2_2 140.7(2) . . . . ?
Pt_1 C1_2 C2_2 S2_2 -111.1(2) . . . . ?
S1_2 C1_2 C2_2 Pt_1 -108.2(2) . . . . ?
C1_2 C2_2 S2_2 O4_2 179.2(3) . . . . ?
Pt_1 C2_2 S2_2 O4_2 101.6(2) . . . . ?
C1_2 C2_2 S2_2 O3_2 48.8(3) . . . . ?
Pt_1 C2_2 S2_2 O3_2 -28.9(3) . . . . ?
C1_2 C2_2 S2_2 C10_2 -65.5(3) . . . . ?
Pt_1 C2_2 S2_2 C10_2 -143.1(2) . . . . ?
O4_2 S2_2 C10_2 C11_2 -140.5(3) . . . . ?
O3_2 S2_2 C10_2 C11_2 -14.4(3) . . . . ?
C2_2 S2_2 C10_2 C11_2 103.4(3) . . . . ?
O4_2 S2_2 C10_2 C15_2 40.1(3) . . . . ?
O3_2 S2_2 C10_2 C15_2 166.2(3) . . . . ?
C2_2 S2_2 C10_2 C15_2 -76.0(3) . . . . ?
C11_2 C10_2 C15_2 C14_2 1.4(5) . . . . ?
S2_2 C10_2 C15_2 C14_2 -179.2(3) . . . . ?
C10_2 C15_2 C14_2 C13_2 -1.1(6) . . . . ?
C15_2 C14_2 C13_2 C12_2 0.4(6) . . . . ?
C15_2 C14_2 C13_2 C16_2 179.8(4) . . . . ?
C14_2 C13_2 C12_2 C11_2 0.0(6) . . . . ?
C16_2 C13_2 C12_2 C11_2 -179.4(4) . . . . ?
C15_2 C10_2 C11_2 C12_2 -1.0(5) . . . . ?
S2_2 C10_2 C11_2 C12_2 179.5(3) . . . . ?
C13_2 C12_2 C11_2 C10_2 0.3(5) . . . . ?
C10_4 C5_4 C6_4 C7_4 -0.7(8) . . . . ?
C4_4 C5_4 C6_4 C7_4 175.2(5) . . . . ?
C5_4 C6_4 C7_4 C8_4 1.4(10) . . . . ?
C6_4 C7_4 C8_4 C9_4 -1.6(10) . . . . ?
C7_4 C8_4 C9_4 C10_4 1.0(9) . . . . ?
C8_4 C9_4 C10_4 C5_4 -0.3(7) . . . . ?
C6_4 C5_4 C10_4 C9_4 0.1(6) . . . . ?
C4_4 C5_4 C10_4 C9_4 -175.6(4) . . . . ?
C10_4 C5_4 C4_4 N1_4 -27.6(5) . . . . ?
C6_4 C5_4 C4_4 N1_4 156.7(4) . . . . ?
C5_4 C4_4 N1_4 C1_4 106.6(4) . . . . ?
C5_4 C4_4 N1_4 C2_4 -76.4(5) . . . . ?
C2_4 N1_4 C1_4 N2_4 -0.5(4) . . . . ?
C4_4 N1_4 C1_4 N2_4 176.8(3) . . . . ?
C2_4 N1_4 C1_4 Pt_1 175.6(3) . . . . ?
C4_4 N1_4 C1_4 Pt_1 -7.0(5) . . . . ?
C1_4 N1_4 C2_4 C3_4 0.3(5) . . . . ?
C4_4 N1_4 C2_4 C3_4 -177.0(4) . . . . ?
N1_4 C2_4 C3_4 N2_4 0.0(4) . . . . ?
N1_4 C1_4 N2_4 C3_4 0.5(4) . . . . ?
Pt_1 C1_4 N2_4 C3_4 -175.2(3) . . . . ?
N1_4 C1_4 N2_4 C11_4 -179.1(3) . . . . ?
Pt_1 C1_4 N2_4 C11_4 5.2(6) . . . . ?
C2_4 C3_4 N2_4 C1_4 -0.3(5) . . . . ?
C2_4 C3_4 N2_4 C11_4 179.3(4) . . . . ?
C10_3 C5_3 C6_3 C7_3 -1.6(6) . . . . ?
C4_3 C5_3 C6_3 C7_3 176.6(4) . . . . ?
C5_3 C6_3 C7_3 C8_3 0.5(7) . . . . ?
C6_3 C7_3 C8_3 C9_3 0.8(7) . . . . ?
C7_3 C8_3 C9_3 C10_3 -1.1(7) . . . . ?
C8_3 C9_3 C10_3 C5_3 0.0(6) . . . . ?
C6_3 C5_3 C10_3 C9_3 1.3(6) . . . . ?
C4_3 C5_3 C10_3 C9_3 -176.7(4) . . . . ?
C6_3 C5_3 C4_3 N1_3 169.5(4) . . . . ?
C10_3 C5_3 C4_3 N1_3 -12.4(6) . . . . ?
C5_3 C4_3 N1_3 C1_3 90.0(4) . . . . ?
C5_3 C4_3 N1_3 C2_3 -91.7(4) . . . . ?
C2_3 N1_3 C1_3 N2_3 -0.7(4) . . . . ?
C4_3 N1_3 C1_3 N2_3 177.8(3) . . . . ?
C2_3 N1_3 C1_3 Pt_1 -176.5(3) . . . . ?
C4_3 N1_3 C1_3 Pt_1 2.1(5) . . . . ?
C1_3 N1_3 C2_3 C3_3 0.4(4) . . . . ?
C4_3 N1_3 C2_3 C3_3 -178.1(3) . . . . ?
N1_3 C2_3 C3_3 N2_3 0.2(4) . . . . ?
N1_3 C1_3 N2_3 C3_3 0.8(4) . . . . ?
Pt_1 C1_3 N2_3 C3_3 176.7(3) . . . . ?
N1_3 C1_3 N2_3 C11_3 -178.6(3) . . . . ?
Pt_1 C1_3 N2_3 C11_3 -2.7(5) . . . . ?
C2_3 C3_3 N2_3 C1_3 -0.6(4) . . . . ?
C2_3 C3_3 N2_3 C11_3 178.8(3) . . . . ?
 
_refine_diff_density_max    2.348
_refine_diff_density_min   -1.564
_refine_diff_density_rms    0.154

_shelx_res_file
;
TITL X4ESxT-13Jun153710_a.res in P-1
    XDS_ASCII_unmerged.res
    created by SHELXL-2019/3 at 22:08:49 on 20-Aug-2023

REM Old TITL X4ESxT-13Jun153710 in P1
REM SHELXT solution in P-1: R1 0.192, Rweak 0.019, Alpha 0.064
REM <I/s>   0.000 for    0 systematic absences,  Orientation as input
REM Formula found by SHELXT:  C37 N5 O4 Cl2 Pt

CELL 0.62000  10.80840  11.80780  15.79950  74.1732  70.0213  76.0162
ZERR    2.00   0.00216   0.00236   0.00316   0.0300   0.0300   0.0300
LATT  1
SFAC  C  N  O  S  PT  H
DISP    Pt   -0.84788    6.75574     24349.60
DISP    H     0.00000    0.00000         0.66
DISP    C     0.00201    0.00119         8.75
DISP    O     0.00771    0.00451        22.87
DISP    S     0.09937    0.09447       352.74
DISP    N     0.00416    0.00245        14.28
UNIT 76 8 8 4 2 80

L.S. 6
LIST 4
BOND $H
CONF
MERG 2
FMAP 2
rem PLAN   25
SHEL 180 0.865
ACTA
WPDB -2
TEMP -173.15
SIZE 0.1 0.05 0.02
REM HFIX_TOE 43 C11 C12 C14 C15 C4 C8 C5 C7
REM HFIX_TOE 13 C1 C2
REM HFIX_TOE 137 C9 C16
REM HFIX_AZA 43 C8 C6 C7 C10 C9 c2 c3
REM HFIX_AZA 23 C4
REM HFIX_AZA 137 C11
PLAN 20

REM Omit extracted on Sun Aug 20 21:52:42 2023
omit 3 5 1
omit -1 -4 2
omit 3 1 0
omit -5 -3 2
omit -1 1 0
omit 2 6 3
omit 1 5 2
omit 5 4 0
omit -2 -2 4
omit 6 -3 15
omit 9 0 14
omit 4 3 2
omit -3 -1 4
omit 3 1 7
omit 0 1 4
omit -1 3 1
omit -2 1 1

REM Omit extracted on Sun Aug 20 21:55:19 2023
omit 0 1 0
omit 2 3 4
omit -2 5 0
omit -6 -1 4
omit 1 1 0
omit 8 0 15
omit -4 -3 1
omit 10 1 14
omit -6 -4 1
omit 2 0 4
omit 6 1 17
omit 12 0 3
omit 2 -3 1
omit 0 2 0
omit 6 4 9

REM Omit extracted on Sun Aug 20 21:57:03 2023
omit -4 -5 4
omit 1 5 0
omit 3 -5 2
omit 2 -1 4
omit 6 1 6
omit 0 -6 1
omit 6 2 9
omit 0 5 1
omit 1 6 1

REM Omit extracted on Sun Aug 20 21:57:13 2023
omit 1 6 2
omit 3 6 1

WGHT    0.008900    2.640500
FVAR       0.25509
RESI 2 TOE
C8    1    0.368261    0.135975    0.066207    11.00000    0.03675    0.04493 =
         0.03693    0.00642   -0.00293   -0.00572
AFIX  43
H8    6    0.389173    0.214364    0.048344    11.00000   -1.20000
AFIX   0
C7    1    0.315725    0.095350    0.012849    11.00000    0.04144    0.07622 =
         0.02015    0.00454   -0.00866    0.00031
AFIX  43
H7    6    0.301781    0.147421   -0.041871    11.00000   -1.20000
AFIX   0
C6    1    0.283742   -0.015431    0.035891    11.00000    0.02594    0.06819 =
         0.02042   -0.01441    0.00286    0.00363
C9    1    0.223013   -0.055106   -0.022115    11.00000    0.03628    0.10166 =
         0.03577   -0.03102   -0.01194    0.01038
AFIX 137
H9A   6    0.129348   -0.017074   -0.011710    11.00000   -1.50000
H9B   6    0.228283   -0.142015   -0.004919    11.00000   -1.50000
H9C   6    0.272028   -0.031957   -0.087331    11.00000   -1.50000
AFIX   0
C5    1    0.306587   -0.091689    0.115229    11.00000    0.03273    0.04412 =
         0.03446   -0.01884   -0.00969    0.00390
AFIX  43
H5    6    0.286205   -0.170205    0.132309    11.00000   -1.20000
AFIX   0
C4    1    0.359234   -0.053612    0.169875    11.00000    0.02661    0.03284 =
         0.02570   -0.01029   -0.00643    0.00052
AFIX  43
H4    6    0.374404   -0.106233    0.224065    11.00000   -1.20000
AFIX   0
C3    1    0.389408    0.060117    0.145633    11.00000    0.01479    0.03261 =
         0.02101   -0.00459    0.00537    0.00160
S1    4    0.451640    0.108807    0.217815    11.00000    0.01300    0.02272 =
         0.02968   -0.00773    0.00755   -0.00461
O1    3    0.540009    0.007864    0.253330    11.00000    0.01921    0.03116 =
         0.03201   -0.00996   -0.00192   -0.00359
O2    3    0.504874    0.215804    0.164660    11.00000    0.02153    0.02769 =
         0.04638   -0.00409    0.01029   -0.01066
C1    1    0.314597    0.141888    0.310308    11.00000    0.01443    0.01712 =
         0.02730   -0.00276    0.00416   -0.00468
AFIX  13
H1    6    0.277866    0.072043    0.356299    11.00000   -1.20000
AFIX   0
C2    1    0.215106    0.248105    0.288959    11.00000    0.01553    0.02141 =
         0.02820   -0.00634    0.00065   -0.00361
AFIX  13
H2    6    0.234389    0.290805    0.222978    11.00000   -1.20000
AFIX   0
S2    4    0.049556    0.232455    0.346186    11.00000    0.01105    0.01983 =
         0.02392   -0.00711    0.00377   -0.00438
O4    3   -0.034650    0.342948    0.319446    11.00000    0.01633    0.02017 =
         0.04098   -0.00783    0.00080   -0.00143
O3    3    0.030383    0.185411    0.443800    11.00000    0.02667    0.03148 =
         0.02170   -0.00945    0.00406   -0.01314
C10   1    0.016975    0.120643    0.304413    11.00000    0.00898    0.02195 =
         0.01975   -0.00627    0.00489   -0.00367
C15   1   -0.001410    0.147609    0.217886    11.00000    0.01559    0.02400 =
         0.02347   -0.00243    0.00057   -0.00013
AFIX  43
H15   6    0.004492    0.225332    0.180457    11.00000   -1.20000
AFIX   0
C14   1   -0.028498    0.059935    0.186575    11.00000    0.02026    0.03974 =
         0.02271   -0.01137   -0.00417   -0.00239
AFIX  43
H14   6   -0.042674    0.078395    0.127851    11.00000   -1.20000
AFIX   0
C13   1   -0.035151   -0.055472    0.240649    11.00000    0.01377    0.03222 =
         0.03215   -0.01330    0.00042   -0.00400
C16   1   -0.065260   -0.151190    0.206670    11.00000    0.04442    0.04750 =
         0.04805   -0.01969   -0.00930   -0.01364
AFIX 137
H16A  6   -0.006793   -0.153861    0.144007    11.00000   -1.50000
H16B  6   -0.158632   -0.132760    0.206595    11.00000   -1.50000
H16C  6   -0.049811   -0.228806    0.247449    11.00000   -1.50000
AFIX   0
C12   1   -0.015015   -0.080107    0.326018    11.00000    0.01243    0.02443 =
         0.02968   -0.00623    0.00469   -0.00373
AFIX  43
H12   6   -0.019282   -0.158041    0.363331    11.00000   -1.20000
AFIX   0
C11   1    0.011395    0.007226    0.358271    11.00000    0.01025    0.02593 =
         0.02015   -0.00480    0.00140   -0.00399
AFIX  43
H11   6    0.025505   -0.011070    0.417006    11.00000   -1.20000
AFIX   0

RESI 1 PT
PT    5    0.324425    0.280110    0.363182    11.00000    0.00983    0.01587 =
         0.03070   -0.00782    0.00342   -0.00448

RESI  4 AZA
C5    1    0.281901    0.564549    0.148092    11.00000    0.02563    0.02440 =
         0.03635   -0.01298    0.00669   -0.01149
C6    1    0.339893    0.603556    0.053457    11.00000    0.04234    0.07383 =
         0.03623   -0.02409    0.01575   -0.03947
AFIX  43
H6    6    0.428827    0.619328    0.031588    11.00000   -1.20000
AFIX   0
C7    1    0.270405    0.619250   -0.007860    11.00000    0.07148    0.10392 =
         0.02902   -0.01838    0.00645   -0.05701
AFIX  43
H7    6    0.311909    0.644014   -0.071907    11.00000   -1.20000
AFIX   0
C8    1    0.139364    0.599109    0.023185    11.00000    0.06523    0.08320 =
         0.03647   -0.01472   -0.00802   -0.04076
AFIX  43
H8    6    0.090323    0.611893   -0.019261    11.00000   -1.20000
AFIX   0
C9    1    0.081071    0.560537    0.115780    11.00000    0.03001    0.04537 =
         0.04592   -0.01385   -0.00094   -0.01768
AFIX  43
H9    6   -0.008114    0.545474    0.137185    11.00000   -1.20000
AFIX   0
C10   1    0.151362    0.543526    0.177942    11.00000    0.02432    0.02816 =
         0.03393   -0.00719    0.00361   -0.00619
AFIX  43
H10   6    0.109858    0.517162    0.241780    11.00000   -1.20000
AFIX   0
C4    1    0.365837    0.539276    0.211974    11.00000    0.01752    0.02799 =
         0.03977   -0.01066    0.00289   -0.00259
AFIX  23
H4A   6    0.419103    0.458357    0.211261    11.00000   -1.20000
H4B   6    0.428980    0.596907    0.188420    11.00000   -1.20000
AFIX   0
N1    2    0.289073    0.546388    0.307079    11.00000    0.01552    0.01996 =
         0.03848   -0.00712   -0.00233   -0.00255
C1    1    0.269306    0.450236    0.377994    11.00000    0.00906    0.02022 =
         0.03808   -0.00627   -0.00325   -0.00087
C2    1    0.231832    0.651990    0.337839    11.00000    0.01924    0.01706 =
         0.04825   -0.00819   -0.00572   -0.00353
AFIX  43
H2    6    0.232126    0.730525    0.301190    11.00000   -1.20000
AFIX   0
C3    1    0.176531    0.622426    0.428280    11.00000    0.02292    0.02461 =
         0.04160   -0.01572   -0.00626   -0.00094
AFIX  43
H3    6    0.129848    0.675961    0.468432    11.00000   -1.20000
AFIX   0
N2    2    0.199637    0.498950    0.453120    11.00000    0.01355    0.02340 =
         0.03833   -0.01223   -0.00198   -0.00061
C11   1    0.156526    0.429974    0.546822    11.00000    0.02594    0.02937 =
         0.03524   -0.00931   -0.00461   -0.00186
AFIX 137
H11A  6    0.128616    0.357480    0.545733    11.00000   -1.50000
H11B  6    0.081378    0.478055    0.584021    11.00000   -1.50000
H11C  6    0.230610    0.408032    0.573684    11.00000   -1.50000
AFIX   0

RESI 3 AZA
C5    1    0.642234    0.446135    0.298613    11.00000    0.01232    0.02414 =
         0.03525   -0.00673   -0.00437   -0.00584
C6    1    0.712784    0.513807    0.219218    11.00000    0.02367    0.03556 =
         0.04091   -0.00596   -0.00074   -0.00972
AFIX  43
H6    6    0.771430    0.476566    0.170577    11.00000   -1.20000
AFIX   0
C7    1    0.698902    0.636410    0.209605    11.00000    0.03598    0.03194 =
         0.05186    0.00859   -0.00798   -0.01741
AFIX  43
H7    6    0.747679    0.682255    0.154133    11.00000   -1.20000
AFIX   0
C8    1    0.615698    0.692068    0.279164    11.00000    0.02957    0.02180 =
         0.06984   -0.00292   -0.02084   -0.00677
AFIX  43
H8    6    0.605690    0.776028    0.271954    11.00000   -1.20000
AFIX   0
C9    1    0.546845    0.624206    0.359690    11.00000    0.02415    0.02890 =
         0.05148   -0.01511   -0.01129   -0.00259
AFIX  43
H9    6    0.490128    0.661658    0.408707    11.00000   -1.20000
AFIX   0
C10   1    0.559406    0.501905    0.369983    11.00000    0.01933    0.02504 =
         0.03995   -0.00873   -0.00433   -0.00695
AFIX  43
H10   6    0.511409    0.456117    0.425828    11.00000   -1.20000
AFIX   0
C4    1    0.654719    0.314082    0.303660    11.00000    0.01475    0.02597 =
         0.03331   -0.01153    0.00784   -0.00571
AFIX  23
H4A   6    0.611093    0.304163    0.260897    11.00000   -1.20000
H4B   6    0.750497    0.280292    0.282213    11.00000   -1.20000
AFIX   0
N1    2    0.596477    0.246222    0.394962    11.00000    0.01261    0.01859 =
         0.03534   -0.00910    0.00320   -0.00280
C1    1    0.467677    0.227814    0.427427    11.00000    0.01024    0.01691 =
         0.03586   -0.01230   -0.00078   -0.00125
C2    1    0.664404    0.189583    0.459295    11.00000    0.01155    0.02866 =
         0.03908   -0.01411   -0.00085   -0.00066
AFIX  43
H2    6    0.755103    0.189865    0.452569    11.00000   -1.20000
AFIX   0
C3    1    0.577297    0.134289    0.532895    11.00000    0.02051    0.02306 =
         0.03946   -0.01029   -0.00361   -0.00151
AFIX  43
H3    6    0.594380    0.087999    0.588408    11.00000   -1.20000
AFIX   0
N2    2    0.457629    0.157685    0.512367    11.00000    0.01446    0.01759 =
         0.03116   -0.00537    0.00006   -0.00370
C11   1    0.336308    0.112313    0.573340    11.00000    0.02001    0.02301 =
         0.03787   -0.00635   -0.00018   -0.00814
AFIX 137
H11A  6    0.287828    0.164269    0.617240    11.00000   -1.50000
H11B  6    0.359937    0.031272    0.606959    11.00000   -1.50000
H11C  6    0.279681    0.110928    0.536768    11.00000   -1.50000

AFIX   0
HKLF 4


REM  X4ESxT-13Jun153710_a.res in P-1
REM wR2 = 0.0636, GooF = S = 1.074, Restrained GooF = 1.074 for all data
REM R1 = 0.0260 for 5440 Fo > 4sig(Fo) and 0.0298 for all 5731 data
REM 446 parameters refined using 0 restraints

END

WGHT      0.0080      2.8393

REM Highest difference peak  2.348,  deepest hole -1.564,  1-sigma level  0.154
Q1    1   0.2971  0.3358  0.3123  11.00000  0.05    2.35
Q2    1   0.3679  0.2581  0.4109  11.00000  0.05    1.77
Q3    1   0.3024  0.6057  0.1079  11.00000  0.05    0.54
Q4    1   0.6173  0.1563  0.6085  11.00000  0.05    0.52
Q5    1   0.5026  0.6172  0.1350  11.00000  0.05    0.51
Q6    1   0.7418  0.0812  0.5976  11.00000  0.05    0.49
Q7    1   0.2715  0.1936  0.5703  11.00000  0.05    0.49
Q8    1   0.2429  0.3220  0.4393  11.00000  0.05    0.47
Q9    1   0.0550 -0.2618  0.1146  11.00000  0.05    0.46
Q10   1   0.3228  0.5562  0.1845  11.00000  0.05    0.46
Q11   1   0.5771  0.0016  0.5410  11.00000  0.05    0.44
Q12   1   0.6442  0.7202  0.3631  11.00000  0.05    0.44
Q13   1  -0.0510  0.0876  0.4397  11.00000  0.05    0.44
Q14   1   0.6071  0.6061  0.1401  11.00000  0.05    0.43
Q15   1   0.8789  0.5003  0.0900  11.00000  0.05    0.43
Q16   1   0.1245 -0.0012  0.4251  11.00000  0.05    0.43
Q17   1   0.0321  0.0403  0.4273  11.00000  0.05    0.42
Q18   1   0.4921  0.1765  0.6227  11.00000  0.05    0.42
Q19   1  -0.0640 -0.0668  0.2063  11.00000  0.05    0.42
Q20   1   0.4215  0.7070  0.3351  11.00000  0.05    0.42
;
_shelx_res_checksum   97740

_shelx_hkl_file
;
  16   7  -1   11.40    5.23
  15  10  -1   14.43    4.34
  15   9  -1   42.40    7.20
  15   9  -2   11.23    4.20
  15   8  -1    6.84    4.05
  15   8  -2   29.75    5.78
  15   8  -3   52.79    7.25
 -15  -7   1   75.00   11.13
  15   7  -2   43.83    7.06
  15   7  -3    1.47    3.80
  15   7  -4   24.95    5.77
 -15  -6   1   39.97    8.24
  15   6  -1   31.12    6.20
 -15  -6   2   10.46    5.53
  15   6  -2   11.40    4.75
 -15  -6   3   85.92   12.34
  15   6  -3   56.88    8.35
  15   6  -4   36.65    6.41
  15   6  -5    3.35    4.01
 -15  -5   1  188.20   18.59
  15   5  -1  151.39   13.23
  15   5  -2   98.83   10.59
 -15  -5   3   35.35    7.83
  15   5  -3   20.82    6.26
  15   5  -4    3.58    4.64
 -15  -4   1   51.33    8.81
  15   4  -1   47.25    6.90
 -15  -4   2    5.69    4.87
  15   4  -2    4.34    4.45
  15   4  -3   25.24    6.35
 -15  -3   1   -0.94    4.67
 -15  -3   1    0.25    3.97
  15   3  -1    0.68    3.85
  15   3  -2   82.61    9.21
  15   3  -3  108.32   11.48
  15   2  -1  131.06   11.11
  15   2  -2   14.11    4.91
  14  11  -1    2.05    3.36
  14  10  -2   17.38    4.66
  14  10  -3   -0.53    2.78
  14   9  -1    9.43    4.17
  14   9  -2   15.04    4.73
  14   9  -3   89.99    9.81
  14   9  -4   63.78    8.01
  14   9  -5   -0.20    3.45
 -14  -8   1   51.04    9.23
  14   8  -1   44.85    6.87
  14   8  -2  100.02   10.28
  14   8  -3   47.81    7.23
  14   8  -4    7.33    4.71
  14   8  -5   88.57    9.75
  14   8  -6   29.15    6.45
 -14  -7   1  124.50   13.34
  14   7  -1  124.57   12.00
 -14  -7   2    3.46    4.13
  14   7  -2    4.84    4.35
  14   7  -3  108.04   11.11
  14   7  -4  143.11   13.46
  14   7  -5    8.42    4.25
  14   7  -6    6.80    4.12
 -14  -6   1   81.49   10.40
  14   6  -1   81.29    9.29
 -14  -6   2  276.41   23.49
  14   6  -2  257.95   20.37
 -14  -6   3   84.98   11.10
  14   6  -3   55.81    7.80
 -14  -6   4    7.76    4.73
  14   6  -5   75.63    9.34
  14   6  -6   68.31    8.86
  14   6  -7   23.50    6.22
 -14  -5   1  191.11   17.47
  14   5  -1  176.30   14.84
 -14  -5   2    1.74    3.77
  14   5  -2    1.44    3.85
 -14  -5   3   65.91    9.53
  14   5  -3   59.57    8.26
 -14  -5   4  119.41   13.27
  14   5  -4   99.86   10.72
 -14  -5   5   83.20   10.80
  14   5  -5   69.65    9.14
  14   5  -6    0.67    4.50
  14   5  -7   68.50    9.29
 -14  -4   1   45.88    7.34
  14   4  -1   37.98    6.23
 -14  -4   2  196.63   17.22
  14   4  -2  201.54   16.91
 -14  -4   3  125.60   12.83
  14   4  -3  126.25   12.66
 -14  -4   4   12.32    4.86
  14   4  -4    6.44    4.48
  14   4  -5   38.95    7.31
 -14  -4   6  140.83   14.81
  14   4  -6  115.00   12.23
  14   4  -7   37.58    7.59
 -14  -3   1  115.25   11.94
  14   3  -1   92.06    8.78
 -14  -3   2   72.84    8.99
  14   3  -2   51.09    6.96
 -14  -3   3    4.19    3.51
  14   3  -3    2.14    4.28
 -14  -3   4  154.57   14.95
  14   3  -4  123.99   12.17
 -14  -3   5  147.48   14.25
 -14  -3   6    2.78    3.94
  14   3  -6    8.85    5.34
  14   3  -7   23.60    7.07
 -14  -2   1   -0.15    3.36
 -14  -2   1    1.72    3.00
  14   2  -1    1.23    3.06
 -14  -2   2   27.97    5.35
  14   2  -2   22.39    5.19
 -14  -2   3  196.89   16.44
 -14  -2   4   65.92    8.55
  14   2  -4   44.33    6.97
 -14  -2   5   23.08    5.66
  14   2  -5    9.95    5.02
  14   2  -6  104.85   11.89
 -14  -1   1  163.15   15.66
 -14  -1   1  152.23   12.41
  14   1  -1  119.80    8.76
 -14  -1   2  153.80   13.92
 -14  -1   2  162.40   13.45
  14   1  -2  144.85   11.37
 -14  -1   3    1.67    3.01
  14   1  -3    0.14    3.87
 -14  -1   4  165.21   15.50
  14   1  -4   98.29    9.55
  14   0  -2   32.11    3.61
  14   0  -2   34.23    5.17
 -14   0   3  130.54   12.81
 -14   0   3  159.75   12.95
  14   0  -3  139.79   10.63
  14   0  -3  163.18   14.09
  14   0  -4   48.06    6.45
  14   0  -4   53.20    8.05
  13  13  -1   86.25    9.41
 -13 -12   1    7.39    9.76
  13  12  -1    8.94    3.75
 -13 -11   1  114.06   16.18
  13  11  -1  154.51   13.93
  13  11  -1  112.28   10.53
  13  11  -2  150.01   13.27
  13  11  -3    5.39    3.78
 -13 -10   1   17.73    8.25
  13  10  -1   27.37    5.29
 -13 -10   2   34.24    9.52
  13  10  -2   45.11    6.65
  13  10  -3  155.25   13.76
  13  10  -4  102.49   10.58
  13  10  -5   10.17    4.52
 -13  -9   1   91.95   11.54
  13   9  -1  117.15   11.70
  13   9  -1   86.17    8.58
 -13  -9   2  102.29   12.00
  13   9  -2  145.97   13.71
  13   9  -3   46.10    6.87
  13   9  -5  167.47   15.19
  13   9  -6  185.49   16.27
 -13  -8   1  175.12   16.25
  13   8  -1  176.12   15.31
  13   8  -1  131.02   11.24
 -13  -8   2   10.27    4.57
  13   8  -3   85.74    9.64
  13   8  -4  218.80   18.14
  13   8  -5  115.19   11.79
  13   8  -6   17.94    5.52
  13   8  -7  114.27   11.92
  13   7  -1   23.99    4.99
 -13  -7   2  169.29   15.76
  13   7  -2  175.62   15.05
 -13  -7   3  100.83   11.30
  13   7  -3  105.28   10.83
 -13  -7   4    7.74    4.51
  13   7  -4    6.18    4.23
  13   7  -5  149.27   14.09
  13   7  -6  128.69   13.25
  13   7  -7   18.47    6.17
  13   7  -8    3.26    4.18
 -13  -6   1  167.45   15.17
 -13  -6   2   16.54    5.07
  13   6  -2   10.06    4.08
 -13  -6   3   60.96    9.19
  13   6  -3   70.81    8.64
 -13  -6   4  205.53   18.51
  13   6  -4  180.31   15.59
 -13  -6   5   51.86    8.14
  13   6  -5   45.52    7.69
  13   6  -6    5.85    4.35
  13   6  -7   69.02    9.58
  13   6  -9   47.34    8.53
 -13  -5   1   18.89    5.02
  13   5  -1   15.65    4.32
 -13  -5   2  198.23   17.33
  13   5  -2  182.62   15.09
 -13  -5   3  155.85   14.76
  13   5  -3  148.32   13.48
 -13  -5   4   10.74    4.92
  13   5  -4    8.93    4.51
 -13  -5   5   31.89    6.41
  13   5  -5   31.38    6.34
 -13  -5   6  166.84   15.73
  13   5  -6  155.49   14.73
  13   5  -7   78.92   10.63
  13   5  -8    1.02    4.17
  13   4  -1  259.12   19.41
 -13  -4   2   66.47    8.21
  13   4  -2   64.45    7.63
 -13  -4   3   -0.79    3.35
  13   4  -3    1.91    3.59
 -13  -4   4   49.50    7.33
  13   4  -4   47.32    7.31
 -13  -4   5  139.32   13.51
  13   4  -5  137.01   13.27
 -13  -4   6   28.23    6.30
  13   4  -6   28.05    6.53
 -13  -4   7   23.43    5.66
  13   4  -7   21.64    6.19
 -13  -4   8  180.73   17.29
  13   4  -8  153.86   15.40
  13   4  -9   78.79   10.61
 -13  -3   1    6.51    3.53
 -13  -3   2   18.62    4.64
  13   3  -2   18.10    4.76
  13   3  -3   91.55    9.69
 -13  -3   4  132.60   12.33
  13   3  -4  136.72   12.78
 -13  -3   5    9.96    4.02
  13   3  -5    9.10    4.54
 -13  -3   6   63.15    8.47
  13   3  -6   46.46    8.02
  13   3  -7  128.41   13.69
 -13  -3   8   29.03    6.14
  13   3  -8   22.37    6.62
 -13  -3   9   24.77    6.57
  13   3  -9   14.74    6.56
  13   3 -10   67.38   10.63
 -13  -2   1   33.85    5.26
  13   2  -1   30.02    4.76
 -13  -2   2   58.29    7.11
  13   2  -2   43.92    5.88
 -13  -2   3   55.12    6.81
 -13  -2   4   20.92    4.58
  13   2  -4   17.34    5.04
  13   2  -5  145.99   13.67
 -13  -2   6   45.82    6.71
  13   2  -6   46.51    7.63
 -13  -2   7    4.09    3.63
 -13  -2   8   53.16    8.14
  13   2  -8   34.95    7.86
  13   2  -9   64.32   10.56
 -13  -1   1   27.09    4.70
 -13  -1   1   29.70    4.49
  13   1  -1   30.95    4.28
  13   1  -2    0.56    2.96
 -13  -1   3  112.13    9.88
  13   1  -3  112.39   10.37
 -13  -1   4  148.95   12.45
  13   1  -4  146.15   12.94
 -13  -1   5    6.27    3.32
 -13  -1   6   35.84    5.85
  13   1  -6   22.49    5.92
 -13  -1   7   44.87    6.95
  13   1  -7   29.26    6.90
 -13  -1   8   44.52    7.46
  13   1  -8   36.74    7.95
  13   0  -1   39.31    3.64
 -13   0   2  225.03   17.22
 -13   0   2  241.76   17.50
  13   0  -2  203.04   13.55
 -13   0   3   59.21    5.94
  13   0  -3   42.39    5.32
 -13   0   4   10.55    3.09
  13   0  -4   10.44    4.25
 -13   0   5   80.89    8.30
  13   0  -5   67.37    8.14
  13   0  -5   77.44    9.10
 -13   0   6   85.08    9.08
  13   0  -6   50.59    7.63
  13   0  -6   76.78    9.52
 -13   0   7   54.58    7.51
  13   0  -7   40.01    7.66
  13   0  -7   57.66    8.70
  13   0  -8   -0.75    4.77
  13   0  -8    4.16    5.51
  13  -1  -3   59.57    4.57
  13  -1  -3   58.49    4.87
 -13   1   4   65.82    6.39
  13  -1  -4   53.03    5.31
  13  -1  -4   62.55    6.23
 -13   1   5   13.98    3.76
  13  -1  -5   13.71    4.20
 -13   1   6    4.50    3.87
  13  -1  -6    8.68    4.71
  13  -1  -6    0.26    4.13
  13  -1  -7   14.66    6.05
  13  -1  -7   20.03    5.66
 -12 -14   1   60.76   16.55
  12  14  -1   76.41    8.75
 -12 -14   2   20.02   13.77
  12  14  -2   40.05    6.30
 -12 -13   1    3.88   15.92
  12  13  -1   18.02    4.29
  12  13  -1   15.15    4.36
  12  13  -2    2.56    3.59
 -12 -12   1   47.11   17.96
  12  12  -1   59.99    7.13
 -12 -12   2   76.78   22.50
  12  12  -2  113.15   11.13
  12  12  -2   95.82   10.16
 -12 -12   3   44.50   21.06
  12  12  -3   59.70    7.53
 -12 -11   1   68.92   17.53
  12  11  -1   76.62    8.48
  12  11  -1   69.33    7.99
 -12 -11   2   -2.43   14.48
  12  11  -2   -0.87    3.55
 -12 -11   3   94.04   22.67
  12  11  -3  102.32   10.32
 -12 -11   4   61.57   21.49
  12  11  -4   98.81   10.51
  12  11  -5   10.75    4.82
 -12 -10   1   69.64   14.44
  12  10  -1   91.79    9.61
  12  10  -1   66.36    7.60
 -12 -10   2  178.90   22.92
  12  10  -2  208.62   17.55
  12  10  -2  158.65   13.98
 -12 -10   3   50.44   16.67
  12  10  -3   64.67    8.01
 -12 -10   4    1.12   14.14
  12  10  -5   18.31    4.99
  12  10  -6   92.11   10.39
 -12  -9   1  163.60   14.84
  12   9  -1  181.29   15.39
  12   9  -1  135.63   11.65
 -12  -9   2    2.55    3.26
  12   9  -2   -0.13    2.95
  12   9  -2   -0.31    3.33
 -12  -9   3   52.69   12.43
  12   9  -3   68.78    8.48
 -12  -9   4   67.13   13.96
  12   9  -4  103.01   10.77
 -12  -9   5   66.55   15.13
  12   9  -5   86.53   10.16
  12   9  -6   28.87    6.07
  12   9  -7   33.82    6.95
 -12  -8   1   27.52    5.46
 -12  -8   1   31.32    7.13
  12   8  -1   29.08    5.13
  12   8  -1   23.04    4.41
 -12  -8   2  161.16   14.94
 -12  -8   2  131.02   14.05
  12   8  -2  154.19   13.41
  12   8  -2  131.00   11.91
 -12  -8   3  106.42   11.44
 -12  -8   3   74.32   10.05
  12   8  -3  103.43   10.44
 -12  -8   4   32.07    6.46
 -12  -8   4   30.80    7.89
  12   8  -4   37.75    6.46
 -12  -8   5    4.97    6.49
  12   8  -5   20.90    5.16
  12   8  -6  133.79   13.36
  12   8  -7   41.32    7.48
 -12  -7   1   88.13    9.55
 -12  -7   1   63.95    7.48
  12   7  -1  100.89    9.86
  12   7  -1   72.93    7.14
 -12  -7   2   19.65    4.96
 -12  -7   2   15.15    4.31
  12   7  -2   19.01    4.32
 -12  -7   3    3.74    3.40
  12   7  -3    1.97    3.02
 -12  -7   4  117.02   12.39
 -12  -7   4   79.65    8.48
  12   7  -4  123.30   12.18
 -12  -7   5  170.11   16.36
 -12  -7   5  114.89   10.89
 -12  -7   6    5.16    3.23
  12   7  -6    9.41    4.41
  12   7  -7   18.67    5.58
  12   7  -9   17.70    5.93
 -12  -6   1   20.63    4.54
  12   6  -1   19.71    4.07
  12   6  -1   19.33    3.33
 -12  -6   2   67.77    8.04
 -12  -6   3  219.55   18.34
  12   6  -3  209.21   16.41
  12   6  -4   43.62    6.40
 -12  -6   5   26.79    6.18
  12   6  -5   22.61    5.32
 -12  -6   6   74.81    9.12
  12   6  -6   85.56   10.08
  12   6  -7  104.01   12.36
  12   6  -8   41.45    7.59
  12   6 -10   42.93    8.08
 -12  -5   1  264.88   20.39
  12   5  -1  248.30   17.95
 -12  -5   2  253.99   20.02
  12   5  -2  241.35   17.89
 -12  -5   3    6.16    3.50
  12   5  -3    6.74    3.28
 -12  -5   4   67.29    8.80
 -12  -5   5  169.70   15.26
  12   5  -5  175.72   15.29
 -12  -5   6  103.27   10.96
 -12  -5   7    5.03    3.58
  12   5  -7    3.68    3.80
  12   5  -8   57.15    8.66
  12   5  -9  131.25   14.04
  12   5 -11   15.10    5.87
 -12  -4   1   89.50    9.09
  12   4  -1   77.62    7.34
  12   4  -2   23.91    4.44
  12   4  -3  164.59   13.49
 -12  -4   4  135.36   12.46
  12   4  -4  147.06   12.94
 -12  -4   5   46.44    6.73
 -12  -4   6   37.17    6.30
  12   4  -6   36.01    6.47
 -12  -4   7  198.18   16.79
  12   4  -7  211.23   18.46
 -12  -4   8  156.48   14.27
  12   4  -8  166.06   15.98
 -12  -4   9    5.79    3.92
  12   4  -9    5.41    4.83
  12   4 -10   26.89    6.95
 -12  -3   1  139.37   12.09
  12   3  -1  143.30   11.52
 -12  -3   2  249.64   19.13
 -12  -3   3  140.29   12.54
  12   3  -3  126.82   10.94
 -12  -3   5  101.06   10.20
  12   3  -5   91.04    9.50
 -12  -3   6  161.97   13.96
  12   3  -6  173.12   15.38
 -12  -3   7   21.46    5.16
  12   3  -7   27.94    6.29
 -12  -3   8   21.23    5.60
  12   3  -8   27.75    6.48
 -12  -3   9  119.09   11.83
  12   3  -9  114.24   12.88
 -12  -3  10   67.58    9.99
  12   3 -10   69.99   10.70
  12   3 -11    7.47    5.17
  12   3 -12   15.91    6.55
 -12  -2   1  110.38    9.92
  12   2  -1  105.26    8.75
 -12  -2   2    3.55    2.63
  12   2  -2    1.87    2.69
 -12  -2   3   36.57    5.25
  12   2  -3   23.43    4.31
 -12  -2   4  208.00   16.60
  12   2  -4  188.71   14.95
 -12  -2   5  135.46   12.12
  12   2  -5  123.45   11.44
 -12  -2   6   -0.07    2.58
  12   2  -6    4.83    3.84
 -12  -2   7  137.61   12.40
  12   2  -7  133.51   13.11
 -12  -2   8  127.01   11.94
  12   2  -8  134.25   13.81
  12   2  -9   38.90    7.96
 -12  -2  10    9.05    4.43
  12   2 -10    8.08    5.32
  12   2 -11   54.65    9.43
  12   2 -12   87.02   12.38
 -12  -1   1    7.03    2.41
  12   1  -1    3.74    2.31
  12   1  -2  177.95   13.42
 -12  -1   3  217.40   16.50
  12   1  -3  203.75   15.28
 -12  -1   4   13.72    3.35
  12   1  -4    9.44    3.60
 -12  -1   5  141.01   12.14
  12   1  -5  114.80   10.58
 -12  -1   6  339.55   25.00
  12   1  -6  307.91   22.97
 -12  -1   7   56.57    6.91
  12   1  -7   49.51    7.33
 -12  -1   8    3.33    3.14
  12   1  -8   -0.28    4.17
 -12  -1   9  102.75   10.88
  12   1  -9   85.68   11.20
 -12  -1  10  181.78   17.03
  12   1 -10  163.02   16.42
 -12  -1  11   71.11    9.56
  12   1 -11   54.31    9.84
  12   1 -11   70.06   11.28
 -12   0   1  260.26   18.82
 -12   0   1  275.42   19.45
  12   0  -1  236.82   15.16
 -12   0   2  203.87   15.09
  12   0  -2  170.26   11.85
 -12   0   3   25.58    3.78
  12   0  -3   17.77    3.70
  12   0  -4  370.05   25.90
 -12   0   5  243.94   18.12
  12   0  -5  220.39   16.86
 -12   0   6    5.29    2.44
  12   0  -6   -0.49    3.64
 -12   0   7   34.60    5.19
  12   0  -7   34.83    6.45
  12   0  -8  124.63   12.91
 -12   0   9  108.38   10.82
  12   0  -9  115.09   12.86
  12   0  -9  137.04   14.32
 -12   0  10    2.31    3.74
  12   0 -10   -2.33    5.15
  12   0 -10    0.16    5.38
  12   0 -11   96.16   13.19
  12   0 -11  120.64   14.28
 -12   1   2   78.32    6.63
  12  -1  -2   84.87    6.16
 -12   1   3  230.93   16.44
  12  -1  -3  191.42   12.52
  12  -1  -3  227.16   16.40
 -12   1   4   60.31    5.76
  12  -1  -4   48.38    5.39
  12  -1  -4   64.88    6.45
 -12   1   5   24.94    4.00
  12  -1  -5   15.64    4.28
  12  -1  -5   22.54    4.39
 -12   1   6  103.06    9.62
  12  -1  -6   90.03    9.14
  12  -1  -6  104.12    9.90
 -12   1   7  193.37   15.78
  12  -1  -7  158.82   13.80
  12  -1  -7  197.54   16.51
 -12   1   8   27.19    5.23
  12  -1  -8   34.67    6.47
  12  -1  -9   48.56    8.62
  12  -1 -10  166.99   16.67
  12  -1 -10  193.73   17.58
 -12   2   4   71.83    5.72
 -12   2   5  201.27   14.50
  12  -2  -5  192.67   13.57
  12  -2  -5  221.57   15.53
 -12   2   6   81.14    8.20
  12  -2  -6   60.73    7.11
  12  -2  -6   77.95    6.98
 -12   2   7   13.84    4.30
  12  -2  -7   11.94    4.92
  12  -2  -7   15.38    3.77
 -12   2   8  214.76   18.23
  12  -2  -8  194.11   16.64
  12  -2  -8  225.66   17.40
  12  -2  -9  166.40   13.80
 -12   3   7  257.06   21.20
  12  -3  -7  181.62   13.24
  12  -3  -7  223.49   15.55
  12  -3  -8   40.10    5.27
  12  -6  -1   42.14    5.21
  12  -8  -1   12.79   27.14
 -11 -15   1   31.25   15.93
  11  15  -1   40.08    6.05
 -11 -15   2   17.58   12.25
  11  15  -2   42.64    6.42
 -11 -14   1   22.73   21.41
  11  14  -1   24.42    4.94
 -11 -14   2   13.68   16.35
  11  14  -2   11.69    4.06
 -11 -14   4   16.20   13.43
 -11 -13   1   33.54   23.87
  11  13  -1   21.76    4.73
  11  13  -1   16.94    4.51
 -11 -13   2   29.49   24.34
  11  13  -2   40.26    6.03
  11  13  -2   35.20    5.53
  11  13  -3   15.19    4.82
  11  13  -3   16.00    4.14
 -11 -13   4   -1.31   15.68
 -11 -13   5   32.41   16.00
 -11 -12   1   40.75   23.99
  11  12  -1   45.92    6.45
 -11 -12   2    2.13   21.91
  11  12  -2    6.94    4.01
 -11 -12   3   -6.71   24.27
  11  12  -3    7.14    3.47
  11  12  -3    5.96    3.74
 -11 -12   4   70.10   27.74
  11  12  -4  101.85   10.49
 -11 -12   5   16.85   20.78
 -11 -11   1   15.10   24.87
  11  11  -1    2.64    2.64
  11  11  -1   -0.69    3.99
 -11 -11   2   87.18   28.84
  11  11  -2   70.11    7.93
  11  11  -2   53.50    6.70
 -11 -11   3   91.07   32.31
  11  11  -3   89.80    9.65
  11  11  -3   66.42    7.58
  11  11  -4   12.37    4.17
 -11 -11   5   -2.79   22.93
  11  11  -5   25.89    5.51
 -11 -11   6   55.53   24.37
  11  11  -6   78.10    9.39
 -11 -10   1  177.33   15.40
 -11 -10   1  179.18   26.56
  11  10  -1  187.59   15.33
  11  10  -1  155.38   13.44
 -11 -10   2  149.59   13.92
 -11 -10   2  157.13   30.18
  11  10  -2  172.32   14.62
  11  10  -2  148.49   13.14
 -11 -10   3   -0.05   22.07
  11  10  -3    0.62    2.73
  11  10  -3   -1.57    3.15
 -11 -10   4   31.98   25.25
  11  10  -4   46.28    6.73
 -11 -10   5   21.59   26.84
  11  10  -5   42.95    6.70
 -11 -10   6   36.02   24.92
  11  10  -6   18.62    5.40
  11  10  -7    5.21    4.11
 -11  -9   1    3.15    2.87
  11   9  -1    0.58    2.31
  11   9  -1    3.18    3.77
 -11  -9   2  114.40   11.43
  11   9  -2  108.59   10.20
  11   9  -2   80.53    7.91
 -11  -9   3  206.40   17.65
 -11  -9   3  186.92   29.86
  11   9  -3  218.32   17.99
  11   9  -3  157.49   14.00
 -11  -9   4   29.54   24.00
  11   9  -4   47.43    6.72
 -11  -9   5   -1.71   23.56
  11   9  -5    2.58    3.30
 -11  -9   6   19.14   25.47
  11   9  -6   41.04    6.82
  11   9  -7  106.55   11.63
  11   9  -8   36.07    6.79
 -11  -8   1  168.60   14.29
 -11  -8   1  145.20   17.26
  11   8  -1  175.03   13.95
 -11  -8   2  120.93   16.49
  11   8  -2  138.16   11.92
  11   8  -2  125.60   11.22
 -11  -8   3   33.69    5.75
 -11  -8   3   30.57   12.82
  11   8  -3   40.07    5.70
 -11  -8   4    9.43    3.94
 -11  -8   4   -3.86   12.94
  11   8  -4    7.51    3.58
 -11  -8   5  224.88   19.49
 -11  -8   5  159.45   24.54
 -11  -8   6   79.60   26.68
  11   8  -6  118.75   12.01
 -11  -8   7    0.92   20.99
  11   8  -7    3.32    3.56
  11   8  -9   58.37    8.66
  11   8 -10    7.76    4.85
 -11  -7   1  130.78   11.55
 -11  -7   1  117.19   12.43
  11   7  -1  139.37   11.60
 -11  -7   2    5.95    3.00
 -11  -7   2    3.74    5.20
  11   7  -2    5.90    3.06
 -11  -7   3  160.26   14.15
 -11  -7   3  125.58   13.97
  11   7  -3  161.55   13.55
 -11  -7   4  307.36   23.65
 -11  -7   4  264.12   24.11
  11   7  -4  352.08   26.75
 -11  -7   5  115.21   11.71
 -11  -7   5   87.27   13.80
  11   7  -5  111.61   10.88
 -11  -7   6   22.46    5.46
 -11  -7   6   21.22   11.56
  11   7  -6   23.15    5.24
 -11  -7   7  105.25   17.12
  11   7  -7  149.96   14.49
 -11  -7   8   38.08   15.36
  11   7  -8   51.88    7.98
  11   7 -10   31.47    7.02
  11   7 -11  104.91   12.97
 -11  -6   1   90.13    8.80
  11   6  -1   93.83    8.44
  11   6  -1   80.30    7.39
 -11  -6   2  296.29   22.67
 -11  -6   2  233.07   18.61
  11   6  -2  296.07   21.95
  11   6  -2  256.33   20.63
 -11  -6   3  162.93   14.02
 -11  -6   3  135.22   12.13
  11   6  -3  168.34   13.90
 -11  -6   4   35.38    5.74
 -11  -6   4   26.07    5.19
  11   6  -4   41.01    5.81
 -11  -6   5  165.22   14.15
  11   6  -5  239.89   19.90
 -11  -6   6  247.76   20.08
  11   6  -6  256.96   20.37
 -11  -6   7   32.47    6.08
 -11  -6   7   20.88    4.91
  11   6  -7   34.03    6.57
 -11  -6   8   10.80    3.94
  11   6  -8   19.71    5.50
  11   6  -9   97.47   11.11
  11   6 -11   10.02    5.19
 -11  -5   1  353.84   25.74
  11   5  -1  336.59   23.25
  11   5  -1  319.37   23.80
 -11  -5   2   15.33    3.71
  11   5  -2   12.90    3.15
 -11  -5   3  191.83   15.53
  11   5  -3  188.91   14.56
 -11  -5   4  358.49   26.58
  11   5  -4  340.32   24.14
 -11  -5   5   97.75   10.05
 -11  -5   6    2.22    3.22
  11   5  -6    3.86    3.18
 -11  -5   7  100.83   10.44
  11   5  -7  110.66   11.45
 -11  -5   8  168.84   14.63
  11   5  -8  198.72   17.80
  11   5  -9   37.02    7.05
  11   5 -10   44.63    8.02
  11   5 -12   33.01    7.53
 -11  -4   1   30.95    4.67
 -11  -4   2  482.74   34.04
  11   4  -2  438.34   28.94
 -11  -4   3  231.29   18.02
  11   4  -3  229.41   17.00
 -11  -4   4    3.07    2.75
  11   4  -4    1.69    2.51
 -11  -4   5  154.30   13.65
  11   4  -5  138.08   11.87
 -11  -4   6  320.60   23.85
  11   4  -6  328.57   24.59
 -11  -4   7  160.49   14.33
  11   4  -7  149.40   13.51
 -11  -4   8    6.19    3.67
  11   4  -8    2.38    3.76
 -11  -4   9   87.89    9.63
  11   4 -10  145.83   15.02
  11   4 -11    5.98    4.76
  11   4 -12   22.23    6.79
  11   4 -13   25.54    6.97
 -11  -3   1  371.29   26.09
  11   3  -1  360.14   24.20
 -11  -3   2   30.05    4.56
  11   3  -2   27.83    4.00
 -11  -3   3   84.47    8.32
 -11  -3   4  273.34   20.37
  11   3  -4  274.85   20.03
  11   3  -5  251.68   18.97
 -11  -3   6   27.94    5.18
  11   3  -6   30.56    5.38
 -11  -3   7  153.66   13.18
  11   3  -7  164.88   14.73
 -11  -3   8  315.99   23.96
 -11  -3   9   93.15    9.68
  11   3  -9   97.77   11.10
 -11  -3  10    0.22    2.75
  11   3 -10    0.05    3.63
  11   3 -11   27.60    6.77
  11   3 -12   92.13   11.89
  11   3 -13   20.91    6.67
 -11  -2   1   18.75    3.49
  11   2  -1   16.47    2.94
 -11  -2   2  384.53   27.39
  11   2  -2  350.67   23.33
 -11  -2   3  394.02   28.02
  11   2  -3  360.69   24.32
 -11  -2   4  138.93   11.72
  11   2  -4  127.57   10.59
  11   2  -5   12.57    3.47
  11   2  -6  333.82   24.55
 -11  -2   7  368.03   26.60
 -11  -2   8    1.15    2.52
  11   2  -8   -2.94    3.22
 -11  -2   9   92.21    9.45
 -11  -2  10  117.49   11.50
  11   2 -10  106.94   12.03
 -11  -2  11   73.10    8.81
  11   2 -11   59.61    9.57
  11   2 -12   -0.64    4.51
  11   2 -13  144.03   15.45
 -11  -1   1  321.34   22.60
  11   1  -1  296.04   19.64
 -11  -1   2  244.09   17.70
  11   1  -2  230.87   16.11
 -11  -1   3    0.38    1.97
  11   1  -3    2.34    2.11
 -11  -1   4  241.81   18.14
  11   1  -4  216.17   15.73
 -11  -1   5  523.09   36.21
  11   1  -5  479.24   32.10
 -11  -1   6   23.95    4.05
  11   1  -6   17.34    4.36
 -11  -1   7  157.29   13.08
  11   1  -7  147.34   13.09
 -11  -1   8  223.25   17.13
  11   1  -8  227.11   18.76
 -11  -1   9  158.70   13.44
  11   1  -9  161.98   15.11
 -11  -1  10   19.17    4.51
  11   1 -10   18.64    5.70
 -11  -1  11   54.45    7.34
  11   1 -11   53.20    8.86
 -11  -1  12   89.93   10.05
  11   1 -12   99.78   12.80
  11   1 -13    6.66    5.37
  11   1 -13   11.26    6.52
  11   1 -14    2.03    5.96
  11   0  -1   28.34    3.17
 -11   0   2   29.63    3.57
  11   0  -2   24.21    3.36
 -11   0   3  325.10   22.61
  11   0  -3  303.31   20.45
 -11   0   4  255.15   18.26
 -11   0   5   17.73    3.23
  11   0  -5   13.86    3.47
 -11   0   6  421.54   29.27
  11   0  -6  388.44   27.03
 -11   0   7  158.33   12.54
 -11   0   8   15.62    3.50
  11   0  -8   20.07    5.07
 -11   0   9   16.03    3.70
  11   0  -9   15.81    5.14
 -11   0  10  202.04   16.53
  11   0 -10  188.58   17.01
  11   0 -10  217.17   19.87
 -11   0  11  150.76   13.75
  11   0 -11  140.47   14.80
  11   0 -11  167.23   16.63
 -11   0  12    2.55    3.88
  11   0 -12    0.47    4.73
  11   0 -12   -2.72    5.13
 -11   0  13   16.14    6.10
  11   0 -13   14.69    6.51
  11   0 -13   16.71    6.76
 -11   1   1  258.75   17.67
 -11   1   1  266.69   17.79
  11  -1  -1  237.32   14.69
 -11   1   2  348.92   22.72
 -11   1   3   48.79    4.34
  11  -1  -3   44.99    4.46
 -11   1   4  221.43   15.19
  11  -1  -4  230.78   17.54
 -11   1   5  415.75   27.70
  11  -1  -5  404.85   27.19
  11  -1  -5  444.26   32.30
 -11   1   6   88.53    7.54
  11  -1  -6   92.74    8.95
  11  -1  -6   99.08    9.03
 -11   1   7    0.26    2.04
  11  -1  -7    2.64    3.20
  11  -1  -7    1.27    2.80
 -11   1   8  117.25   10.22
  11  -1  -8  120.05   11.18
 -11   1   9  184.74   14.56
  11  -1  -9  188.35   16.35
  11  -1  -9  237.88   20.72
 -11   1  10   52.00    7.15
  11  -1 -10   51.61    8.06
  11  -1 -10   59.40    8.61
 -11   1  11   31.55    6.39
  11  -1 -11   28.95    6.94
  11  -1 -12  113.59   13.98
  11  -1 -13   68.09   11.10
  11  -1 -13   73.37   10.68
  11  -2  -3  395.59   25.04
  11  -2  -3  406.63   26.08
 -11   2   4  165.12   11.99
  11  -2  -4  148.98   10.34
  11  -2  -4  162.92   11.29
 -11   2   5    1.79    1.98
  11  -2  -5    2.09    2.49
  11  -2  -5    3.52    2.12
 -11   2   6   63.85    6.39
  11  -2  -6   54.56    6.13
  11  -2  -6   65.63    6.18
  11  -2  -7  134.26   11.95
 -11   2   8  173.63   14.31
  11  -2  -8  164.11   14.30
  11  -2  -8  179.07   14.13
 -11   2   9   12.30    4.12
  11  -2  -9    8.12    3.81
 -11   2  10  188.31   16.93
  11  -2 -10  162.75   15.44
 -11   2  11  109.92   12.44
  11  -2 -11   92.11   11.37
  11  -2 -11  118.11   11.98
  11  -2 -12   24.69    7.87
  11  -2 -12   30.22    6.78
 -11   3   5   92.57    7.59
  11  -3  -5   76.04    5.69
  11  -3  -5   74.19    4.96
 -11   3   6  128.64   10.78
  11  -3  -6  111.03    8.72
  11  -3  -6  129.76    9.32
 -11   3   7   23.93    4.48
  11  -3  -7   27.89    3.60
 -11   3   8   81.33    9.14
  11  -3  -8   70.34    8.50
  11  -3  -8   59.60    5.96
 -11   3   9  158.63   14.06
  11  -3  -9  161.10   14.89
  11  -3  -9  175.87   13.59
 -11   3  10   30.16    6.38
  11  -3 -10   33.41    5.26
  11  -3 -11    2.63    5.44
 -11   4   7  315.39   25.14
  11  -4  -7  166.23   11.08
 -11   4   8   64.88    8.52
  11  -4  -8   63.26    7.55
  11  -4  -8   65.30    5.59
 -11   4   9    8.96    6.13
  11  -4  -9    7.55    5.10
  11  -4  -9    9.74    3.17
  11  -4 -10    8.48    6.32
  11  -4 -10    5.64    3.49
  11  -5  -9   35.59    6.48
  11  -5  -9   37.97    4.93
  11  -6  -1   98.03   17.19
  11  -6  -2   22.91    7.02
  11  -7  -1    1.67   10.26
  11  -7  -2  103.72   24.08
  11  -7  -3  130.68   11.60
  11  -8  -1   96.34   17.02
  11  -8  -3   -0.06   11.30
  11  -9  -1   -5.67   11.19
  11  -9  -2   21.57   23.65
  11  -9  -3   45.39   23.45
  11 -10  -1   62.63   16.17
  11 -10  -2   -2.34   21.56
 -10 -16   1    9.35   11.09
 -10 -16   2   27.40   12.56
 -10 -15   1   21.09   19.22
  10  15  -1   35.17    5.26
 -10 -15   2    6.70   13.36
  10  15  -2    8.74    3.49
 -10 -15   3   10.87   11.77
 -10 -15   4   33.73   14.32
 -10 -14   1   15.49   19.56
  10  14  -1    1.64    3.04
 -10 -14   2   86.00   24.57
  10  14  -2   98.14    9.89
  10  14  -2   82.86    8.80
 -10 -14   3   38.33   21.20
  10  14  -3   32.06    5.21
 -10 -14   4   10.00   11.76
 -10 -13   1  131.86   31.26
 -10 -13   2   21.10   22.26
  10  13  -2   14.83    4.23
  10  13  -2   13.50    4.25
  10  13  -3    5.87    3.51
  10  13  -3    6.20    3.69
 -10 -13   4   33.97   16.90
  10  13  -4   49.88    7.09
 -10 -13   5   73.01   17.88
 -10 -13   6   10.81   10.70
 -10 -12   1   -9.20   21.91
  10  12  -1    3.87    2.80
  10  12  -1   -1.56    3.71
 -10 -12   2   18.37   20.94
  10  12  -2   23.51    4.73
 -10 -12   3   64.95   24.86
  10  12  -3   87.88   10.22
  10  12  -3   61.86    7.39
 -10 -12   4   50.86   17.81
  10  12  -4   60.51    7.72
 -10 -12   5   10.96   14.45
  10  12  -5    3.56    3.19
 -10 -12   6   60.18   16.28
  10  12  -6   83.72    9.92
 -10 -11   1  148.09   13.59
 -10 -11   1  127.53   29.76
  10  11  -1  123.18   11.18
 -10 -11   2  163.20   32.25
  10  11  -2  173.11   14.59
  10  11  -2  137.94   12.21
  10  11  -3   52.38    6.61
  10  11  -3   54.65    6.80
  10  11  -4   67.35    7.80
 -10 -11   5  204.01   28.70
 -10 -11   6   31.22   14.74
  10  11  -6   61.23    8.31
 -10 -11   7    6.33   11.53
  10  11  -7    1.76    3.78
 -10 -11   8   26.27   13.60
 -10 -10   1   77.97    8.49
 -10 -10   1   90.25   24.63
  10  10  -1   80.51    7.88
  10  10  -1   76.23    7.88
 -10 -10   2    4.94    3.16
 -10 -10   2   15.13   20.69
  10  10  -2    3.62    2.62
  10  10  -2    0.64    3.49
 -10 -10   3  204.55   16.99
 -10 -10   3  234.46   35.40
  10  10  -3  179.07   15.46
  10  10  -4  191.67   15.68
 -10 -10   5    4.37   16.25
  10  10  -5    5.60    3.33
 -10 -10   6   66.33   17.95
  10  10  -6   90.81   10.05
  10  10  -7  154.36   14.28
  10  10  -8   65.31    8.93
 -10  -9   1  114.86   10.73
 -10  -9   1   96.58   22.80
  10   9  -1  118.00   10.23
  10   9  -1  102.01    9.47
 -10  -9   2  342.80   25.24
  10   9  -2  384.09   28.18
  10   9  -2  292.58   21.88
 -10  -9   3   93.68    9.31
 -10  -9   3  104.34   25.67
  10   9  -3  110.78   10.35
  10   9  -3   89.18    8.75
 -10  -9   4   54.45    7.00
 -10  -9   4   59.90   22.33
  10   9  -4   64.37    7.38
 -10  -9   5  124.39   11.99
 -10  -9   5  108.77   27.43
  10   9  -5  150.99   13.66
 -10  -9   6   99.84   20.83
  10   9  -6  145.43   13.42
 -10  -9   7   13.61   13.20
  10   9  -7    4.95    3.74
 -10  -9   8   61.01   15.35
  10   9  -8   82.75   11.13
 -10  -9   9  143.15   21.05
  10   9  -9  202.18   18.63
  10   9 -10   15.96    5.90
 -10  -8   1  384.94   27.37
 -10  -8   1  376.26   37.56
  10   8  -1  374.42   28.75
 -10  -8   2    2.35    2.51
 -10  -8   2   -5.56   16.76
  10   8  -2    2.89    2.28
  10   8  -2    2.12    3.04
 -10  -8   3  293.91   22.06
 -10  -8   3  317.62   38.28
  10   8  -3  313.71   23.26
  10   8  -3  253.10   19.70
 -10  -8   4  402.33   28.69
 -10  -8   4  430.50   46.77
  10   8  -4  409.97   28.75
 -10  -8   5   89.49    9.46
 -10  -8   5   89.62   24.11
  10   8  -5   96.66    9.51
 -10  -8   6   13.49    4.02
 -10  -8   6    8.74   19.20
  10   8  -7  269.31   21.14
  10   8  -8  303.67   23.70
 -10  -8   9    2.74   11.83
  10   8 -10  104.98   11.79
  10   8 -11   30.21    7.05
 -10  -7   1  121.79   10.39
 -10  -7   1  125.86   16.42
  10   7  -1  127.62   10.29
  10   7  -1  135.35   12.09
 -10  -7   2  356.72   25.19
 -10  -7   2  357.18   33.94
  10   7  -2  369.82   25.80
 -10  -7   3  226.01   17.15
 -10  -7   3  248.37   29.85
 -10  -7   4   24.28    4.63
 -10  -7   4   25.58   18.03
  10   7  -4   27.86    4.64
 -10  -7   5  130.51   24.31
  10   7  -5  203.71   16.77
 -10  -7   6  375.03   27.73
 -10  -7   6  327.14   38.32
  10   7  -6  400.36   29.56
 -10  -7   7   39.99    6.26
 -10  -7   7   26.28   21.18
  10   7  -7   43.49    6.55
 -10  -7   8   42.48   16.45
  10   7  -8   78.34    9.24
 -10  -7   9  106.78   19.85
  10   7  -9  166.27   15.75
  10   7 -10   62.85    9.79
  10   7 -11    4.48    4.46
  10   7 -12   24.96    7.27
 -10  -6   1  127.86   12.44
  10   6  -1  164.19   12.84
  10   6  -1  150.17   12.43
 -10  -6   2   27.96    4.38
  10   6  -2   32.19    4.39
  10   6  -2   32.39    4.24
 -10  -6   3   85.79    8.43
  10   6  -3   88.66    8.14
 -10  -6   4  358.09   25.37
  10   6  -4  381.06   27.02
 -10  -6   5  184.09   15.41
  10   6  -5  166.75   13.42
 -10  -6   6    3.67    3.14
  10   6  -6    3.98    2.76
 -10  -6   7  201.92   16.46
  10   6  -7  225.78   18.34
 -10  -6   8  114.81   11.40
 -10  -6   8   71.26   22.92
  10   6  -8  117.67   11.74
 -10  -6   9    4.49   18.27
  10   6  -9    5.99    4.14
 -10  -6  10   -6.02   16.37
  10   6 -10    6.27    4.17
  10   6 -12  150.34   15.35
 -10  -5   1    7.83    2.60
 -10  -5   1    4.20    2.89
  10   5  -1    4.53    2.08
  10   5  -1    4.97    2.45
 -10  -5   2  345.03   25.19
 -10  -5   2  302.91   23.84
  10   5  -2  356.64   25.69
  10   5  -2  272.70   19.70
 -10  -5   3  339.83   25.89
  10   5  -3  417.12   29.67
 -10  -5   4    0.76    2.29
 -10  -5   4    1.34    3.40
  10   5  -4    1.16    2.23
 -10  -5   5  253.81   19.80
 -10  -5   5  202.46   16.51
  10   5  -5  266.58   20.55
 -10  -5   6  234.05   18.83
 -10  -5   6  206.59   18.37
 -10  -5   7  123.78   11.68
 -10  -5   7  109.74   13.30
  10   5  -7  128.33   11.92
 -10  -5   8    1.04    2.50
 -10  -5   8    5.74    9.62
  10   5  -8    1.87    2.88
 -10  -5   9  104.55   10.32
 -10  -5   9   83.42   14.94
  10   5  -9  118.11   12.25
 -10  -5  10   98.13   18.07
  10   5 -10  187.21   17.86
  10   5 -11   67.75    9.27
  10   5 -13   68.35   10.13
 -10  -4   1  438.96   29.14
  10   4  -1  445.18   29.09
  10   4  -1  491.37   37.48
 -10  -4   2  242.78   17.74
 -10  -4   3   34.41    4.81
  10   4  -3   33.29    4.33
 -10  -4   4  331.33   24.12
  10   4  -4  316.90   22.15
 -10  -4   5  317.60   23.60
  10   4  -5  296.50   21.07
 -10  -4   6   15.77    3.89
  10   4  -6   14.97    3.75
 -10  -4   7   39.12    5.71
 -10  -4   8  241.18   19.07
  10   4  -8  235.20   18.67
 -10  -4   9  126.93   11.47
  10   4  -9  153.03   14.45
 -10  -4  10   -0.55    2.70
  10   4 -10    0.62    3.72
  10   4 -11  166.74   15.93
  10   4 -12   80.70   10.78
  10   4 -13   24.65    6.84
  10   4 -14    0.02    4.23
 -10  -3   1   16.64    3.02
  10   3  -1   17.39    2.77
 -10  -3   2  204.40   15.11
  10   3  -2  209.93   15.10
 -10  -3   3  429.76   29.63
  10   3  -3  421.74   28.28
 -10  -3   4  109.00    9.70
 -10  -3   5    4.72    2.54
  10   3  -5    4.37    2.51
 -10  -3   6  270.14   20.31
  10   3  -6  255.80   18.89
 -10  -3   7  415.53   29.38
  10   3  -7  415.64   29.48
 -10  -3   8   50.12    6.41
  10   3  -8   42.46    6.30
 -10  -3   9   72.99    8.15
  10   3  -9   71.78    8.65
  10   3 -10  220.47   18.82
 -10  -3  11   56.53    7.03
  10   3 -11   68.69    9.39
  10   3 -12    3.49    4.32
  10   3 -13   53.44    9.24
  10   3 -14   68.82   10.37
  10   3 -15   10.00    6.82
  10   2  -1  509.50   33.01
 -10  -2   2  402.52   27.75
  10   2  -2  382.29   25.14
 -10  -2   3   37.45    4.70
  10   2  -3   30.87    3.88
 -10  -2   4  134.23   11.01
  10   2  -4  125.49   10.09
 -10  -2   5  239.27   17.66
 -10  -2   6  175.07   13.73
  10   2  -6  180.25   14.33
 -10  -2   7   14.20    3.50
  10   2  -7   10.81    3.54
 -10  -2   8  264.04   19.73
  10   2  -8  271.07   20.94
 -10  -2  10    9.69    3.35
  10   2 -10   11.73    4.45
 -10  -2  11   19.76    4.42
  10   2 -11   16.88    5.21
 -10  -2  12  150.48   13.51
  10   2 -13   62.48    9.72
  10   2 -14    1.09    4.12
  10   2 -15   11.97    5.73
 -10  -1   1   64.52    5.92
  10   1  -1   56.31    4.92
 -10  -1   2   87.90    7.49
  10   1  -2   81.91    6.63
  10   1  -3  151.66   11.32
 -10  -1   4  138.80   11.02
  10   1  -4  133.06   10.41
 -10  -1   5   44.03    5.13
  10   1  -5   36.41    4.62
 -10  -1   6   86.38    7.92
  10   1  -6   83.18    8.14
 -10  -1   7  191.89   14.93
  10   1  -7  180.21   14.41
  10   1  -8   51.79    6.67
 -10  -1   9   12.61    3.48
  10   1  -9   10.68    4.09
 -10  -1  10   32.33    4.91
  10   1 -11   86.96   10.48
 -10  -1  12   12.88    3.93
  10   1 -12   15.86    5.50
 -10  -1  13   10.64    4.03
  10   1 -13   14.14    5.79
  10   1 -13   12.79    5.87
  10   1 -14   51.57    8.81
  10   1 -14   65.48   10.70
  10   1 -15   33.30    7.56
  10   1 -15   40.56    9.16
 -10   0   1  276.59   18.89
  10   0  -1  256.86   16.72
 -10   0   2  331.56   22.94
  10   0  -2  288.31   18.52
 -10   0   3   41.55    4.29
  10   0  -3   38.06    4.05
 -10   0   4   32.32    3.81
  10   0  -4   28.67    3.87
 -10   0   5  298.19   21.31
  10   0  -5  262.57   18.17
 -10   0   6  167.67   12.72
  10   0  -6  165.07   13.10
 -10   0   7    5.43    2.24
  10   0  -7    2.95    2.90
 -10   0   8   62.11    6.30
  10   0  -8   64.51    7.67
 -10   0   9  126.25   10.64
  10   0  -9  129.67   12.20
 -10   0  10   94.59    8.75
  10   0 -10  102.52   11.05
 -10   0  11   -0.85    2.37
  10   0 -11    2.40    3.28
  10   0 -11    2.01    4.15
 -10   0  12   73.45    8.66
  10   0 -12   65.39    9.32
  10   0 -12   66.83    9.42
 -10   0  13   79.36    9.14
  10   0 -13   78.14   10.90
  10   0 -13   72.92   10.03
  10   0 -14   11.37    5.75
  10   0 -15    6.91    5.19
  10   0 -15   11.13    6.43
  10  -1  -1   97.69    6.71
 -10   1   2   10.33    1.69
  10  -1  -2    9.56    1.85
 -10   1   3  325.16   22.40
  10  -1  -3  275.05   17.68
 -10   1   4  356.24   23.61
 -10   1   5   30.82    3.48
  10  -1  -5   32.24    4.25
 -10   1   6   29.41    3.61
  10  -1  -6   30.85    4.68
 -10   1   7   93.31    7.81
 -10   1   8   61.00    6.01
  10  -1  -8   58.03    6.93
  10  -1  -8   67.34    7.18
 -10   1   9   42.41    5.13
  10  -1  -9   38.88    6.13
  10  -1  -9   47.95    6.23
 -10   1  10   18.41    3.91
  10  -1 -10   16.92    4.77
  10  -1 -10   13.58    4.66
 -10   1  11  165.53   13.83
  10  -1 -11  169.42   15.93
  10  -1 -11  167.03   14.97
 -10   1  12   80.43    9.33
  10  -1 -12   56.77    8.61
  10  -1 -12   75.38    9.85
 -10   1  13    0.17    3.40
  10  -1 -13    0.44    4.21
  10  -1 -13   -1.43    4.91
 -10   1  14   45.50    8.15
  10  -1 -14   27.71    7.74
  10  -1 -14   40.59    8.44
  10  -1 -15   67.08   10.58
  10  -1 -15  107.70   13.50
  10  -2  -2  268.55   17.11
  10  -2  -3   36.40    3.33
 -10   2   4    7.71    1.72
  10  -2  -4    8.08    2.10
  10  -2  -4    8.47    2.08
 -10   2   5   98.46    7.62
 -10   2   6   70.89    6.13
  10  -2  -6   71.75    7.01
  10  -2  -6   74.34    6.54
  10  -2  -7   50.25    6.16
 -10   2   8   18.18    3.41
  10  -2  -8   12.73    3.73
  10  -2  -8   18.41    3.61
 -10   2   9   50.43    6.07
  10  -2  -9   46.13    5.76
 -10   2  10  124.42   11.19
  10  -2 -10  119.77   11.90
  10  -2 -10  136.79   12.16
 -10   2  11   42.69    6.18
  10  -2 -11   41.51    7.19
  10  -2 -11   45.03    6.72
 -10   2  12   11.51    4.42
  10  -2 -12    6.01    4.35
  10  -2 -13   41.40    8.21
 -10   2  14   84.91   11.77
  10  -2 -14   76.74   11.28
  10  -2 -14   97.87   11.42
  10  -2 -15   -0.15    5.89
  10  -2 -15    0.58    5.67
 -10   3   4  200.29   14.51
  10  -3  -4  155.81   10.05
  10  -3  -4  162.92   10.27
 -10   3   5  106.53    8.31
  10  -3  -5   97.66    7.32
  10  -3  -5  112.61    7.99
 -10   3   6   13.79    2.78
  10  -3  -6   16.11    3.15
  10  -3  -6   15.64    2.40
 -10   3   7   12.76    3.33
  10  -3  -7   12.81    3.39
  10  -3  -7   13.03    2.48
  10  -3  -8  179.04   14.58
 -10   3   9   77.66    8.30
  10  -3  -9   82.63    9.37
  10  -3  -9   86.04    7.60
 -10   3  10    5.14    3.46
  10  -3 -10   -0.10    2.72
  10  -3 -11   56.23    8.33
 -10   3  12   82.40   10.80
  10  -3 -12   71.60    9.78
  10  -3 -12   73.44    8.25
 -10   3  13   51.93    9.34
  10  -3 -13   42.86    8.90
  10  -3 -13   59.11    7.96
  10  -3 -14    4.75    5.95
  10  -3 -14    4.60    4.64
  10  -4  -1    1.54    6.59
  10  -4  -6  116.95    8.76
 -10   4   7  232.05   18.50
  10  -4  -7  197.93   14.28
  10  -4  -7  210.75   14.04
 -10   4   8    4.46    3.64
  10  -4  -8    2.83    3.26
  10  -4  -8    4.42    2.19
  10  -4  -9   19.64    5.04
  10  -4  -9   16.23    3.19
 -10   4  10  104.82   10.91
  10  -4 -10  111.74   11.57
  10  -4 -10  121.77    9.96
 -10   4  11   39.37    7.44
  10  -4 -11   42.28    7.77
  10  -4 -11   49.52    6.08
 -10   4  12    1.01    4.72
  10  -4 -12    0.85    4.38
  10  -4 -12   -0.29    3.59
  10  -4 -13   28.10    7.57
  10  -4 -13   41.88    6.79
  10  -5  -1  118.26   12.06
  10  -5  -2   19.36   11.79
  10  -5  -7   30.52    3.43
  10  -5  -7   30.09    2.98
 -10   5   8   89.98    8.83
  10  -5  -8   67.55    6.87
  10  -5  -8   71.26    5.83
 -10   5   9  107.10   11.80
  10  -5  -9   87.56    9.28
  10  -5  -9   90.23    7.15
  10  -5 -10   31.53    6.35
  10  -5 -10   29.34    4.19
 -10   5  11    5.57    6.10
  10  -5 -11    5.47    4.75
  10  -5 -11    4.39    3.18
  10  -5 -12   98.86   12.43
  10  -5 -12   92.13    8.91
  10  -6  -2   37.33   14.39
  10  -6  -3  133.46   13.26
  10  -6  -9    1.15    3.57
  10  -6  -9   -0.01    2.86
  10  -6 -10   40.78    5.57
  10  -6 -11   64.13   11.17
  10  -7  -1  131.38   13.51
  10  -7  -3   60.10   21.76
  10  -7  -4   26.28    5.09
  10  -8  -2   -5.84   13.49
  10  -8  -3  111.56   30.84
  10  -8  -5    5.82    3.98
  10  -9  -2  157.63   23.44
  10  -9  -4   -5.17   17.20
  10  -9  -5   32.24    9.22
  10  -9  -6   58.68    7.47
  10 -10  -1  124.02   16.41
  10 -10  -2   -3.23   13.52
  10 -10  -5   63.00   15.33
  10 -11  -1    6.06    9.65
  10 -11  -4   30.69   26.05
  10 -12  -1   17.81   11.56
  10 -12  -2   29.49   15.75
  -9 -16   1   28.77   15.92
  -9 -16   2   19.93   11.61
  -9 -15   1    4.18   17.01
   9  15  -1    9.61    3.98
   9  15  -1   13.00    3.85
   9  15  -2   38.55    5.60
  -9 -15   3  119.25   18.81
   9  15  -3  137.08   13.07
  -9 -15   4   22.90   10.06
  -9 -15   5   -1.55    8.21
  -9 -14   1  152.29   25.55
   9  14  -1  186.29   15.82
   9  14  -1  155.19   13.75
   9  14  -2  113.35   10.86
  -9 -14   3    4.33   10.47
   9  14  -3    1.65    2.86
  -9 -14   4   23.61   10.69
  -9 -14   5   50.20   12.32
  -9 -14   6   28.51   10.12
  -9 -14   7    1.01    7.62
  -9 -13   1   25.12   16.76
   9  13  -1   31.93    5.08
   9  13  -1   34.79    5.63
  -9 -13   2   87.26   18.45
   9  13  -2   94.39    9.63
   9  13  -2   68.56    7.70
  -9 -13   3   73.76   15.90
   9  13  -3  131.12   12.76
   9  13  -3   88.57    8.75
   9  13  -4   69.87    8.35
   9  13  -4   59.17    7.05
  -9 -13   5   11.09    9.50
   9  13  -5    9.92    4.22
  -9 -13   6   34.60   10.72
  -9 -13   7   69.28   12.64
  -9 -13   8   17.47    8.19
  -9 -12   1  132.97   23.54
   9  12  -1  143.09   12.30
   9  12  -1  121.03   10.93
  -9 -12   2  142.61   21.39
   9  12  -2  166.23   14.23
   9  12  -2  122.98   10.93
  -9 -12   3   48.94   13.44
   9  12  -3   70.76    7.89
  -9 -12   4   23.66   10.38
   9  12  -4   27.95    5.17
   9  12  -4   22.77    4.65
  -9 -12   5  174.48   20.09
   9  12  -5  221.85   18.65
  -9 -12   6   99.85   14.81
   9  12  -6  125.33   12.59
   9  12  -7   -2.16    3.61
  -9 -12   8   28.55    9.88
  -9 -12   9   63.34   10.91
  -9 -11   1   52.97    6.78
  -9 -11   1   58.44   20.51
   9  11  -1   54.83    6.07
   9  11  -1   49.49    6.21
  -9 -11   2    5.89    3.54
  -9 -11   2   -2.88   10.07
   9  11  -2    6.45    2.76
   9  11  -2    8.35    4.05
   9  11  -3   75.59    7.96
   9  11  -3   67.96    7.47
   9  11  -4  281.55   22.12
   9  11  -4  218.23   18.26
   9  11  -5   46.53    6.48
  -9 -11   6   33.42    9.92
   9  11  -6   53.71    7.61
  -9 -11   7  106.24   14.49
   9  11  -7  147.73   14.62
  -9 -11   8   42.74    9.89
   9  11  -8   57.79    8.23
  -9 -11   9    0.26    7.38
  -9 -11  10   26.37    9.04
  -9 -10   1  118.77   22.91
   9  10  -1  116.23    9.80
   9  10  -1  107.41   10.04
  -9 -10   2  222.03   17.66
  -9 -10   2  202.32   25.16
   9  10  -2  231.01   17.61
   9  10  -2  196.17   16.15
  -9 -10   3  106.06    9.99
  -9 -10   3  114.01   17.12
   9  10  -3  118.75   10.59
   9  10  -3  113.19   10.62
  -9 -10   4    2.08    2.52
   9  10  -4    0.38    2.44
   9  10  -4    1.27    3.03
  -9 -10   6  165.33   17.83
   9  10  -6  230.25   19.23
   9  10  -7   20.37    4.92
  -9 -10   8   20.39    9.21
   9  10  -8   25.08    5.74
  -9 -10   9   67.36   10.81
   9  10  -9   95.72   11.19
  -9 -10  10   47.50    9.85
  -9  -9   1  321.00   23.17
  -9  -9   1  348.21   38.83
   9   9  -1  319.02   22.30
   9   9  -1  305.48   23.55
  -9  -9   2   43.73    5.66
  -9  -9   2   57.11   17.41
   9   9  -2   48.84    5.82
   9   9  -2   67.02    7.60
  -9  -9   3  224.41   25.54
   9   9  -3  234.82   18.13
   9   9  -3  198.43   16.10
  -9  -9   4  269.97   20.42
   9   9  -4  295.97   22.35
   9   9  -4  239.93   19.56
  -9  -9   5   44.24    6.17
  -9  -9   5   37.55   10.53
   9   9  -5   46.11    6.24
  -9  -9   6    2.68    2.81
  -9  -9   6    5.43    7.64
   9   9  -6    2.89    3.12
  -9  -9   7  107.70   14.30
   9   9  -7  120.56   11.71
  -9  -9   8  145.70   15.88
   9   9  -8  187.95   16.69
  -9  -9   9   49.37   10.12
   9   9 -10   32.40    6.58
  -9  -9  11   64.58   10.66
   9   9 -11   93.34   12.75
  -9  -8   1  119.32   10.25
  -9  -8   1  132.80   22.59
   9   8  -1  121.68    9.93
   9   8  -1  107.94    9.33
  -9  -8   2  521.25   35.36
  -9  -8   2  592.82   55.37
   9   8  -2  549.82   37.47
   9   8  -2  471.60   34.24
  -9  -8   3  224.93   17.36
  -9  -8   3  220.65   26.03
   9   8  -3  229.06   17.30
   9   8  -3  205.09   16.40
  -9  -8   4    1.34    2.27
  -9  -8   4   -0.27    8.66
   9   8  -4    1.39    2.24
  -9  -8   5  162.45   13.71
  -9  -8   5  136.43   17.49
   9   8  -5  176.82   14.58
  -9  -8   6  155.58   13.15
   9   8  -6  184.87   15.54
  -9  -8   7   62.19    7.53
  -9  -8   7   50.97   10.68
   9   8  -7   78.97    9.92
  -9  -8   8   -0.50    6.81
   9   8  -8    1.61    2.91
  -9  -8   9   52.53    9.65
   9   8  -9   78.94    9.44
  -9  -8  10   72.78   11.20
  -9  -8  11    6.54    6.83
   9   8 -11    7.73    4.57
   9   8 -12   -1.64    3.91
  -9  -7   1  400.13   27.88
  -9  -7   1  418.63   40.91
   9   7  -1  411.48   28.24
   9   7  -1  348.12   24.96
  -9  -7   2    8.49    2.68
  -9  -7   2    2.42   14.01
   9   7  -2    7.70    2.32
   9   7  -2    8.80    3.41
  -9  -7   3   49.93    5.84
  -9  -7   3   59.10   16.60
   9   7  -3   54.01    5.91
   9   7  -3   42.15    4.86
  -9  -7   4  157.32   12.73
  -9  -7   4  148.34   19.89
   9   7  -4  177.49   14.24
  -9  -7   5  189.05   15.02
   9   7  -5  200.97   15.77
  -9  -7   6    3.25    7.61
   9   7  -6    3.25    2.56
  -9  -7   7   66.29    7.77
  -9  -7   7   57.83   10.62
   9   7  -7   67.21    7.65
  -9  -7   8  144.99   13.04
  -9  -7   8  136.22   15.58
   9   7  -8  153.92   13.76
  -9  -7   9   25.37    8.06
   9   7  -9   42.63    6.60
   9   7 -10    2.18    3.19
  -9  -7  11   10.26    7.11
   9   7 -12   57.02    8.73
  -9  -6   1   69.55    6.61
  -9  -6   1   74.13   12.71
   9   6  -1   78.08    6.97
   9   6  -1   65.35    5.93
  -9  -6   2  276.82   29.91
   9   6  -2  256.76   18.41
   9   6  -2  223.01   16.87
  -9  -6   3  213.78   16.12
  -9  -6   3  224.23   27.15
   9   6  -3  226.53   16.90
   9   6  -3  191.16   14.86
  -9  -6   4   26.72    4.24
  -9  -6   4   25.51   13.78
   9   6  -4   31.93    4.35
  -9  -6   5   20.07    3.98
   9   6  -5   21.62    3.94
  -9  -6   6  160.36   13.74
  -9  -6   6  113.20   14.48
   9   6  -6  162.84   13.87
  -9  -6   7   78.36    8.43
   9   6  -7   89.85    9.12
  -9  -6   8    2.41    2.73
  -9  -6   8   -4.81    6.53
   9   6  -8   -1.78    2.54
  -9  -6   9   48.35    6.56
  -9  -6   9   32.64    8.36
   9   6  -9   47.96    6.93
  -9  -6  10   40.19    8.57
   9   6 -10   60.16    8.20
  -9  -6  11   34.07    8.08
   9   6 -11   61.62    8.58
  -9  -6  12   10.50    6.54
   9   6 -13   44.55    8.17
  -9  -5   1  384.19   26.89
  -9  -5   1  351.20   28.32
   9   5  -1  403.27   28.26
   9   5  -1  314.18   22.00
  -9  -5   2  226.92   16.86
  -9  -5   2  222.36   20.55
   9   5  -2  227.37   16.54
   9   5  -2  191.37   14.11
  -9  -5   3    0.31    1.79
   9   5  -3    1.43    1.72
  -9  -5   4  311.29   30.50
   9   5  -4  310.14   21.73
  -9  -5   5  289.75   21.71
  -9  -5   5  218.43   23.76
   9   5  -5  300.53   22.25
  -9  -5   6   16.31    3.77
  -9  -5   6   20.12   14.22
   9   5  -6   17.99    3.78
  -9  -5   7   32.02    4.93
  -9  -5   7   20.79    9.50
  -9  -5   8  106.03   10.01
   9   5  -8  108.79   10.38
  -9  -5   9   61.56    7.42
  -9  -5   9   36.14    8.41
   9   5  -9   62.45    7.79
  -9  -5  10   31.73    5.23
  -9  -5  10   21.26    8.07
   9   5 -10   37.68    6.44
  -9  -5  11    3.75    6.51
   9   5 -11    6.40    3.79
   9   5 -12  123.12   12.88
   9   5 -13   68.59    9.52
   9   5 -14    3.78    4.91
  -9  -4   1   96.44    8.07
  -9  -4   1   94.16    8.41
   9   4  -1   96.97    7.73
   9   4  -1  102.66    8.44
  -9  -4   2   53.15    5.46
  -9  -4   2   50.98    5.51
   9   4  -2   52.10    5.16
   9   4  -2   44.88    4.09
  -9  -4   3  436.73   30.12
  -9  -4   3  402.00   30.29
  -9  -4   4  257.07   18.90
  -9  -4   4  228.23   17.97
   9   4  -4  270.77   19.75
  -9  -4   5    7.16    2.76
  -9  -4   5    9.06    5.56
   9   4  -5   10.09    2.74
  -9  -4   6  171.63   14.07
  -9  -4   6  138.77   15.13
   9   4  -6  168.52   13.61
  -9  -4   7  126.13   11.09
  -9  -4   7   98.30   14.36
   9   4  -7  138.18   12.25
  -9  -4   8   97.44    9.56
  -9  -4   8   59.24   14.86
  -9  -4   9    1.00    2.43
  -9  -4   9    2.52    8.06
   9   4  -9    0.03    2.50
  -9  -4  10  139.84   12.79
  -9  -4  10  100.26   12.53
   9   4 -10  139.46   13.28
  -9  -4  11  251.38   19.50
   9   4 -11  257.99   21.05
  -9  -4  12    3.54    6.93
  -9  -4  12    6.17    3.50
   9   4 -12    7.30    4.18
   9   4 -13    8.29    4.38
   9   4 -14   42.97    8.00
  -9  -3   1  202.22   14.44
   9   3  -1  199.36   13.76
   9   3  -1  209.72   15.85
  -9  -3   2  394.01   26.58
   9   3  -2  392.89   26.07
  -9  -3   3   46.63    5.10
   9   3  -3   44.67    4.64
  -9  -3   4  173.00   13.29
   9   3  -4  168.00   12.53
  -9  -3   5  319.30   22.93
   9   3  -5  299.56   20.77
  -9  -3   6  123.07   10.45
   9   3  -6  123.99   10.49
  -9  -3   7   20.26    3.86
   9   3  -7   23.95    4.28
  -9  -3   8   20.36    3.89
   9   3  -8   18.99    4.01
  -9  -3   9  231.74   17.89
  -9  -3  10   83.88    8.69
   9   3 -10   85.53    9.29
  -9  -3  11   14.91    3.72
   9   3 -11   17.40    4.90
  -9  -3  12   42.49    5.91
   9   3 -13   65.40    9.18
   9   3 -14   24.07    6.08
   9   3 -15    3.32    4.06
  -9  -2   1  262.78   18.05
   9   2  -1  262.04   17.58
   9   2  -2   15.47    2.52
  -9  -2   3  369.76   25.21
   9   2  -3  363.40   24.21
  -9  -2   4  212.33   15.55
   9   2  -4  211.04   15.13
  -9  -2   5   49.54    5.38
   9   2  -5   42.74    4.83
  -9  -2   6   12.40    2.89
  -9  -2   7  210.60   16.22
   9   2  -7  191.06   14.71
  -9  -2   8  213.58   16.69
   9   2  -8  190.25   14.79
  -9  -2   9    5.21    2.56
   9   2  -9    4.64    2.71
  -9  -2  10   30.05    4.62
   9   2 -10   33.08    5.98
   9   2 -11   21.32    4.93
  -9  -2  12   94.71    9.31
   9   2 -12   98.91   11.02
  -9  -2  13   21.08    4.72
   9   2 -13   19.30    5.45
   9   2 -14   41.96    7.75
   9   2 -15  103.56   12.76
   9   2 -16   17.51    6.15
  -9  -1   1  205.28   14.31
  -9  -1   2  685.38   44.84
   9   1  -2  661.05   41.89
  -9  -1   3  134.10   10.23
   9   1  -3  129.74    9.67
  -9  -1   4    5.14    2.02
   9   1  -4    6.49    2.07
  -9  -1   5   56.96    5.63
   9   1  -5   52.51    5.38
  -9  -1   6  257.55   18.72
   9   1  -6  239.00   17.16
  -9  -1   7   87.42    7.87
  -9  -1   8   37.35    4.82
   9   1  -8   25.62    4.26
  -9  -1   9  116.41    9.90
   9   1  -9  124.49   11.38
  -9  -1  10   54.85    6.12
   9   1 -10   52.07    6.87
  -9  -1  11   54.84    6.32
   9   1 -11   58.54    7.77
  -9  -1  12   11.95    3.46
   9   1 -12   12.20    4.75
  -9  -1  13  185.70   15.56
   9   1 -13  178.06   17.11
   9   1 -14  120.87   12.99
   9   1 -14  154.33   17.10
   9   1 -15    3.82    4.03
   9   1 -15    0.17    5.09
   9   1 -16   32.15    7.13
  -9   0   1  480.98   31.63
   9   0  -1  450.84   28.36
  -9   0   2   50.13    4.55
   9   0  -2   43.45    3.90
  -9   0   3  113.71    8.57
  -9   0   4  295.38   20.32
   9   0  -4  282.27   19.00
   9   0  -5  188.37   13.72
  -9   0   6   12.35    2.61
   9   0  -6    9.77    2.60
  -9   0   7  252.57   17.91
   9   0  -7  251.39   18.47
  -9   0   8  207.55   15.42
   9   0  -8  196.30   15.31
  -9   0   9   64.07    6.42
   9   0  -9   70.84    7.83
  -9   0  10    0.68    2.06
   9   0 -10    1.04    2.72
  -9   0  11   81.93    7.95
   9   0 -11   87.42    9.82
  -9   0  12  168.87   13.28
   9   0 -12  223.79   21.35
  -9   0  13    8.64    3.36
   9   0 -13    7.73    4.49
   9   0 -13    3.42    4.52
  -9   0  14   27.46    5.34
   9   0 -14   25.31    6.64
   9   0 -15   51.62    8.62
   9   0 -15   61.25    9.55
   9   0 -16   38.36    8.73
   9   0 -16   50.78    9.73
   9  -1  -1   78.51    5.54
  -9   1   2  152.86   10.60
   9  -1  -2  143.47    9.69
  -9   1   3  238.11   15.98
   9  -1  -3  234.57   15.73
  -9   1   4  170.54   11.93
   9  -1  -4  166.28   11.85
  -9   1   5   27.79    3.13
   9  -1  -5   26.13    3.55
   9  -1  -6  466.86   31.30
  -9   1   7  202.65   14.54
   9  -1  -7  196.97   14.81
  -9   1   8    3.67    1.83
   9  -1  -8    3.14    2.39
   9  -1  -9   14.06    3.73
   9  -1  -9   10.41    3.33
   9  -1 -10  199.41   16.48
  -9   1  11  195.50   14.95
   9  -1 -11  206.02   17.65
   9  -1 -11  208.53   17.10
  -9   1  12    0.47    2.54
   9  -1 -12    0.81    3.83
   9  -1 -13  114.08   12.53
  -9   1  14   85.63    9.63
   9  -1 -14   79.28   10.14
   9  -1 -14   91.34   10.88
   9  -1 -15   17.24    5.92
   9  -1 -15   22.70    6.66
   9  -1 -16    6.67    4.46
   9  -1 -16    0.31    5.43
  -9   2   2  177.06   11.37
   9  -2  -2  175.13   11.14
   9  -2  -2  195.28   13.12
  -9   2   3    6.41    1.40
  -9   2   4  234.41   15.89
   9  -2  -4  215.79   14.29
   9  -2  -4  235.24   16.03
  -9   2   5  416.29   26.51
   9  -2  -5  435.65   28.73
   9  -2  -5  458.12   30.90
  -9   2   6   29.90    3.18
   9  -2  -6   30.66    4.08
   9  -2  -6   37.34    4.13
   9  -2  -7    9.02    2.61
  -9   2   8  132.50   10.24
   9  -2  -8  135.08   11.36
   9  -2  -8  143.15   11.29
  -9   2   9  245.19   17.65
   9  -2  -9  235.26   17.87
   9  -2  -9  262.03   19.32
  -9   2  10   55.01    5.98
   9  -2 -10   61.94    7.54
   9  -2 -10   66.05    6.95
  -9   2  11  105.65    9.86
   9  -2 -11   96.20   10.07
   9  -2 -11  113.00   10.44
  -9   2  12  195.54   15.73
   9  -2 -12  206.26   17.99
   9  -2 -12  218.86   17.73
  -9   2  13   69.30    8.20
   9  -2 -13   67.42    9.18
   9  -2 -13   82.64    9.39
  -9   2  14    0.92    3.54
   9  -2 -14    1.87    3.63
   9  -2 -14    0.63    4.29
  -9   2  15   97.46   11.87
   9  -2 -15   80.62   10.19
   9  -2 -16   86.05   11.27
   9  -2 -16  126.93   14.03
  -9   3   4  180.64   12.66
   9  -3  -4  173.25   11.58
  -9   3   5   17.74    3.05
   9  -3  -5   17.42    2.71
   9  -3  -5   18.92    2.14
  -9   3   6   58.45    5.18
   9  -3  -6   67.24    6.35
   9  -3  -6   63.85    5.08
  -9   3   7  259.09   17.53
   9  -3  -7  273.66   19.48
   9  -3  -7  295.71   20.45
  -9   3   8  155.05   12.35
   9  -3  -8  155.62   12.82
   9  -3  -8  156.07   11.47
  -9   3   9   37.15    4.94
   9  -3  -9   35.18    5.29
   9  -3  -9   35.45    4.18
  -9   3  10  341.58   24.33
   9  -3 -10  352.20   24.37
  -9   3  11  160.50   13.66
   9  -3 -11  162.13   14.58
   9  -3 -11  172.12   13.56
  -9   3  12    4.43    3.59
   9  -3 -12    9.93    4.28
   9  -3 -12    7.62    3.63
  -9   3  13   29.03    5.92
   9  -3 -13   28.70    5.42
   9  -3 -14   68.77   10.02
  -9   3  15   71.88   10.97
   9  -3 -15   69.25   10.40
   9  -3 -15   69.52    9.03
   9  -3 -16   -0.73    4.39
   9  -4  -1  222.42   17.58
  -9   4   5  152.94   11.21
   9  -4  -5  134.24    9.21
   9  -4  -5  134.91    8.67
  -9   4   6  362.87   25.47
   9  -4  -6  344.97   22.97
   9  -4  -6  342.16   21.66
  -9   4   7   11.44    3.25
   9  -4  -7   17.88    3.39
   9  -4  -7   18.36    2.41
  -9   4   8  159.33   12.48
   9  -4  -8  166.39   13.19
   9  -4  -8  180.22   12.84
  -9   4   9  304.40   22.14
   9  -4  -9  317.36   23.39
   9  -4  -9  314.39   21.15
  -9   4  10   54.76    6.89
   9  -4 -10   54.56    7.02
   9  -4 -10   62.69    5.89
  -9   4  11   17.35    4.81
   9  -4 -11   17.49    4.69
   9  -4 -11   17.38    3.47
  -9   4  12  119.84   12.64
   9  -4 -12  131.30   13.26
   9  -4 -12  139.17   11.64
  -9   4  13  136.06   14.23
   9  -4 -13  125.33   13.21
   9  -4 -13  124.18   10.74
  -9   4  14   11.41    5.70
   9  -4 -14   10.11    5.35
   9  -4 -14   15.75    4.78
  -9   4  15   39.44    8.69
   9  -4 -15   23.65    7.44
   9  -4 -15   25.61    5.89
   9  -5  -1   78.12    7.72
   9  -5  -2    6.71    7.75
   9  -5  -3   75.71    9.25
   9  -5  -6   72.25    5.80
   9  -5  -6   67.17    4.86
  -9   5   7  288.17   20.89
   9  -5  -7  257.06   17.63
   9  -5  -7  260.88   16.91
  -9   5   8  125.12   11.43
   9  -5  -8  114.62    8.09
  -9   5   9    2.35    4.21
   9  -5  -9    2.16    2.92
   9  -5  -9   -0.89    1.91
  -9   5  10   90.23   10.53
   9  -5 -10   82.13    9.10
   9  -5 -10   80.75    6.65
  -9   5  11  206.08   19.07
   9  -5 -11  177.99   15.73
   9  -5 -11  181.14   12.97
  -9   5  12   69.01   10.57
   9  -5 -12   60.65    8.62
   9  -5 -12   66.96    6.74
  -9   5  13    0.75    5.11
   9  -5 -13    1.36    3.75
   9  -5 -13    2.69    3.36
  -9   5  14  158.31   18.36
   9  -5 -14  145.65   12.48
   9  -5 -15   61.78   11.66
   9  -5 -15   47.25    9.10
   9  -6  -1  109.03   10.32
   9  -6  -2  148.28   15.75
   9  -6  -4    1.92    4.55
   9  -6  -7   11.55    2.29
   9  -6  -7   10.36    1.98
   9  -6  -8   42.18    4.97
   9  -6  -8   46.79    4.74
  -9   6   9  184.97   15.64
   9  -6  -9  150.16   10.75
   9  -6 -10  112.81   11.06
  -9   6  11    5.71    5.27
   9  -6 -11    6.71    4.42
   9  -6 -11    5.45    2.79
  -9   6  12   97.52   13.76
   9  -6 -12   70.66    6.97
   9  -6 -13  145.21   14.94
   9  -7  -1  153.40   13.55
   9  -7  -4  225.00   24.38
   9  -7  -5   51.08    6.78
   9  -7  -9   27.83    4.61
   9  -7  -9   29.70    4.36
   9  -7 -10   33.33    6.17
   9  -7 -10   30.37    4.90
   9  -7 -11  127.33   12.84
   9  -7 -11  134.06   11.49
   9  -7 -12   57.19    9.27
   9  -7 -12   50.59    6.63
   9  -8  -2  175.96   18.53
   9  -8  -4   13.86   18.61
   9  -8  -6  114.40   11.14
   9  -8 -10  105.07   10.51
   9  -8 -10   93.75    8.87
   9  -8 -11    0.12    4.92
   9  -8 -11   -0.18    4.28
   9  -9  -1  183.87   17.53
   9  -9  -3   22.48   17.14
   9  -9  -4  154.23   33.36
   9  -9  -5   67.29   16.68
   9  -9  -6    1.49    5.75
   9  -9  -7   40.92    7.20
   9 -10  -1    1.99    6.31
   9 -10  -2  112.15   15.80
   9 -10  -3   98.77   22.67
   9 -10  -5   -0.51   18.16
   9 -10  -6   66.37   13.44
   9 -10  -7   73.47   10.33
   9 -11  -1  153.41   17.43
   9 -11  -2   38.97   12.53
   9 -11  -3    1.48   16.68
   9 -11  -5  113.22   31.21
   9 -11  -6    9.49   12.85
   9 -12  -1    1.56    7.41
   9 -12  -2    5.89   11.38
   9 -12  -3   65.94   24.44
   9 -12  -5   22.48   24.94
   9 -13  -2   46.65   13.23
   9 -14  -1   29.31   10.99
  -8 -16   1   -2.47    9.74
  -8 -16   2   38.57   11.55
  -8 -16   3   89.90   15.35
  -8 -15   1   85.86   16.44
   8  15  -1  110.97   10.88
   8  15  -1   89.36    9.17
  -8 -15   2  122.16   17.54
   8  15  -2  148.90   13.32
   8  15  -2  133.76   12.37
   8  15  -3   16.23    4.78
   8  15  -3   15.87    3.96
  -8 -15   4   67.55   12.36
   8  15  -4   52.91    6.54
  -8 -15   5   91.68   12.86
  -8 -15   6   10.04    7.11
  -8 -14   1   66.75   14.12
   8  14  -1   68.41    7.72
   8  14  -1   68.52    7.79
  -8 -14   2   23.68    9.74
   8  14  -2   23.24    4.85
  -8 -14   3  160.93   18.76
   8  14  -3  187.14   16.01
  -8 -14   4   67.22   11.83
   8  14  -4   94.73   10.26
   8  14  -4   72.08    8.04
  -8 -14   5    2.92    6.94
   8  14  -5    5.56    4.06
  -8 -14   7   36.39    8.20
  -8 -14   8   26.75    7.35
  -8 -13   1   87.97   14.45
   8  13  -1  114.37   10.48
   8  13  -1   93.06    9.33
  -8 -13   2  221.85   23.21
   8  13  -2  263.04   20.99
   8  13  -2  188.22   15.06
  -8 -13   3   20.53    8.86
   8  13  -3   22.36    4.54
   8  13  -3   20.73    4.52
   8  13  -4   27.30    4.93
  -8 -13   5   75.83   12.29
   8  13  -5   87.05    9.63
  -8 -13   6   59.32    9.78
   8  13  -6   89.62   10.40
  -8 -13   7   10.23    6.46
  -8 -13   8   12.34    6.48
  -8 -13   9   49.76    8.69
  -8 -12   1  134.25   12.14
  -8 -12   1  128.00   16.60
   8  12  -1  143.12   11.95
   8  12  -1  125.12   11.15
  -8 -12   2    4.00    2.93
  -8 -12   2   -0.28    7.47
   8  12  -2    3.17    2.69
   8  12  -2    2.26    3.56
  -8 -12   3   94.81   12.97
   8  12  -3  117.31   10.76
  -8 -12   4   89.79   12.30
   8  12  -4  115.97   11.24
   8  12  -4   90.20    9.07
  -8 -12   5   39.47    8.54
   8  12  -5   49.08    6.71
  -8 -12   6    1.71    6.35
   8  12  -6    5.04    3.59
   8  12  -7  126.91   12.36
  -8 -12   8   60.39    9.29
   8  12  -8   75.11    9.60
  -8 -12   9    2.26    5.51
  -8 -12  11    5.77    5.76
  -8 -11   1   71.14    7.67
   8  11  -1   78.57    7.40
   8  11  -1   78.63    8.23
  -8 -11   2  130.24   11.59
  -8 -11   2  122.52   15.13
   8  11  -2  140.07   11.68
   8  11  -2  131.70   12.02
  -8 -11   3   28.28    5.00
  -8 -11   3   25.51    8.04
   8  11  -3   32.30    4.83
   8  11  -3   31.30    5.04
  -8 -11   4    0.27    2.65
   8  11  -4   -0.37    2.29
   8  11  -4   -0.40    3.01
  -8 -11   5   71.78   10.22
   8  11  -5   77.04    8.28
  -8 -11   6  134.29   13.74
   8  11  -6  179.54   15.70
  -8 -11   7   35.52    7.47
   8  11  -7   39.02    6.35
  -8 -11   8   11.40    5.79
   8  11  -8   19.76    5.02
  -8 -11   9   19.29    5.84
   8  11  -9   23.10    5.67
  -8 -11  10   16.39    5.87
  -8 -11  11   17.29    5.61
  -8 -10   1  215.05   16.48
  -8 -10   1  203.34   21.64
   8  10  -1  225.49   16.61
  -8 -10   2   43.95    5.78
   8  10  -2   46.54    5.30
   8  10  -2   46.38    6.19
  -8 -10   3   20.20    4.01
  -8 -10   3   22.50    7.59
   8  10  -3   20.36    3.74
   8  10  -3   18.46    4.38
  -8 -10   4  162.66   13.42
  -8 -10   4  154.68   15.56
   8  10  -4  187.99   15.24
   8  10  -4  168.26   14.72
  -8 -10   5  125.61   11.36
  -8 -10   5  118.29   12.74
   8  10  -5  147.19   12.92
  -8 -10   6   -2.41    5.25
   8  10  -6    2.31    2.76
   8  10  -7   66.40    7.87
  -8 -10   8   74.36    9.32
   8  10  -8   92.71   10.11
  -8 -10   9   31.24    6.38
   8  10  -9   36.12    6.38
  -8 -10  10    2.49    4.40
  -8 -10  11   50.53    7.80
  -8 -10  12   65.41    9.08
  -8  -9   1    0.51    2.10
  -8  -9   1   -1.90    7.38
   8   9  -1    0.51    1.68
   8   9  -1    2.42    2.70
  -8  -9   2  109.47   10.02
  -8  -9   2   85.87   12.32
   8   9  -2   94.45    8.83
  -8  -9   3  247.39   19.06
  -8  -9   3  209.75   19.79
   8   9  -3  243.62   18.10
   8   9  -3  222.34   18.00
  -8  -9   4   46.29    8.56
   8   9  -4   51.57    5.83
   8   9  -4   52.47    6.26
  -8  -9   5   32.80    5.17
  -8  -9   5   37.02    7.34
   8   9  -5   43.67    5.59
  -8  -9   6  177.52   14.77
  -8  -9   6  165.51   15.57
   8   9  -6  189.75   15.59
  -8  -9   7   42.36    6.11
  -8  -9   7   42.83    7.18
  -8  -9   8    3.87    4.55
   8   9  -8    3.41    2.97
  -8  -9   9    3.56    4.36
   8   9  -9    3.84    3.17
  -8  -9  10   99.84   11.41
  -8  -9  11   61.33    8.17
   8   9 -11   94.09   11.29
  -8  -9  12    4.29    5.19
  -8  -8   1  244.23   25.58
   8   8  -1  274.06   19.61
   8   8  -1  244.41   18.86
  -8  -8   2  234.46   17.49
  -8  -8   2  222.97   22.25
   8   8  -2  258.29   19.04
   8   8  -2  210.94   16.18
  -8  -8   3    0.13    2.10
  -8  -8   3    2.58    6.42
   8   8  -3    0.69    1.65
   8   8  -3    0.81    2.80
  -8  -8   4  141.00   11.95
  -8  -8   4  143.70   15.54
   8   8  -4  126.07   10.98
  -8  -8   5  138.32   11.68
   8   8  -5  156.30   12.89
  -8  -8   6    5.96    3.14
  -8  -8   6    7.07    5.39
   8   8  -6   11.76    3.42
  -8  -8   7   15.36    3.98
  -8  -8   7   15.21    5.20
   8   8  -7   18.99    4.39
  -8  -8   8   63.71    7.78
  -8  -8   8   51.54    7.20
   8   8  -8   60.87    7.91
  -8  -8   9   77.71    8.69
   8   8  -9  100.23   10.64
  -8  -8  10   19.11    5.48
   8   8 -10   22.42    5.16
  -8  -8  11    6.55    4.72
   8   8 -12   38.70    7.16
  -8  -8  13   38.91    7.23
  -8  -7   1  167.75   12.35
  -8  -7   1  229.37   26.65
   8   7  -1  178.99   12.99
   8   7  -1  185.65   14.92
  -8  -7   2   70.23   12.19
   8   7  -2   85.14    7.60
   8   7  -2   68.74    6.46
  -8  -7   3  293.48   20.87
  -8  -7   3  282.18   25.12
   8   7  -3  317.16   22.72
   8   7  -3  274.33   20.96
  -8  -7   4  130.41   10.89
  -8  -7   4  129.03   13.90
   8   7  -4  123.19   10.69
  -8  -7   5   13.66    3.33
  -8  -7   5    8.13    5.50
   8   7  -5   13.81    3.29
  -8  -7   6   33.82    5.00
  -8  -7   6   30.45    6.26
   8   7  -6   46.16    5.87
  -8  -7   7  128.14   12.74
   8   7  -7  147.43   12.78
  -8  -7   8   99.92    9.84
  -8  -7   8   82.90    8.93
   8   7  -8  123.95   11.78
  -8  -7   9    8.56    3.61
  -8  -7   9    7.42    4.46
   8   7  -9   14.36    4.10
  -8  -7  10   83.00    9.02
   8   7 -10  107.06   11.33
  -8  -7  11   43.47    6.71
   8   7 -11   63.11    8.43
  -8  -7  12    3.15    4.42
  -8  -7  13    7.78    4.75
   8   7 -13    3.78    3.99
  -8  -6   1  486.65   31.88
  -8  -6   1  524.44   46.48
  -8  -6   2  259.03   18.24
   8   6  -2  293.36   21.12
   8   6  -2  242.93   18.26
  -8  -6   3   96.84    8.29
  -8  -6   3  108.44   14.18
   8   6  -3  104.06    8.76
   8   6  -3   91.91    8.01
  -8  -6   4    3.15    2.09
  -8  -6   4    5.34    6.06
   8   6  -4    1.38    1.85
  -8  -6   5  144.95   11.70
  -8  -6   5  140.27   14.41
   8   6  -5  159.32   12.72
  -8  -6   6  198.07   15.49
  -8  -6   6  173.28   15.22
   8   6  -6  209.86   16.42
  -8  -6   7    8.38    3.10
  -8  -6   7    7.32    4.59
   8   6  -7   10.98    3.18
  -8  -6   8   51.02    6.47
  -8  -6   8   43.76    6.23
   8   6  -8   54.91    6.79
  -8  -6   9  184.28   15.26
  -8  -6   9  162.34   14.11
   8   6  -9  191.49   16.12
  -8  -6  10   35.14    5.38
  -8  -6  10   29.26    5.73
   8   6 -10   35.64    5.85
   8   6 -11    1.99    3.16
  -8  -6  12   34.69    5.97
   8   6 -12   49.49    7.57
  -8  -6  13  103.42   10.30
   8   6 -13  132.01   14.00
   8   6 -14   42.82    7.60
  -8  -5   1   76.06    6.67
  -8  -5   1   68.65   11.86
   8   5  -1   77.92    6.58
  -8  -5   2    3.51    1.79
  -8  -5   2   -1.40   10.62
   8   5  -2    2.83    1.51
   8   5  -2    3.64    2.36
  -8  -5   3  138.51   11.04
  -8  -5   3  147.67   18.93
   8   5  -3  120.54    9.57
  -8  -5   4  380.29   26.08
  -8  -5   4  379.55   32.26
   8   5  -4  382.30   25.91
   8   5  -5  156.76   12.13
  -8  -5   6   35.89    4.80
   8   5  -6   32.66    4.35
  -8  -5   7  200.80   15.96
  -8  -5   7  164.81   14.15
   8   5  -7  203.48   16.18
  -8  -5   8  115.78   10.64
  -8  -5   8   94.54    9.27
  -8  -5   9    4.58    2.76
  -8  -5   9    3.77    3.51
   8   5  -9    7.76    3.19
  -8  -5  10   17.75    4.01
  -8  -5  10   14.74    4.37
   8   5 -10   18.79    4.33
  -8  -5  11  172.51   14.68
  -8  -5  11  137.93   11.86
   8   5 -11  178.93   16.07
  -8  -5  12   89.12    8.93
   8   5 -12  102.96   11.14
  -8  -5  13    1.73    4.05
   8   5 -13    0.79    3.40
  -8  -5  14   68.73    8.20
   8   5 -14   91.66   11.29
   8   5 -15   92.08   11.43
  -8  -4   1  193.31   13.62
  -8  -4   1  199.67   16.97
   8   4  -1  206.15   14.47
   8   4  -1  198.77   15.07
  -8  -4   2  541.94   35.55
  -8  -4   2  536.00   41.75
   8   4  -2  570.94   37.96
   8   4  -2  516.72   37.38
  -8  -4   3  484.69   31.47
  -8  -4   3  519.83   43.21
   8   4  -3  509.85   33.66
  -8  -4   4   12.36    2.69
  -8  -4   4   12.63    9.30
  -8  -4   5  294.84   20.69
  -8  -4   5  302.70   26.60
   8   4  -5  305.11   21.37
  -8  -4   6  252.43   21.19
   8   4  -6  292.32   21.33
  -8  -4   7   55.39    6.21
  -8  -4   7   45.63    6.92
   8   4  -7   51.13    5.78
  -8  -4   8    2.02    2.11
  -8  -4   8   -0.25    3.95
   8   4  -8    2.24    2.12
  -8  -4   9   67.92    7.20
  -8  -4  10  200.37   15.80
   8   4 -10  256.03   20.72
  -8  -4  11   28.25    4.73
  -8  -4  11   20.92    4.50
   8   4 -11   31.96    5.48
  -8  -4  12   87.54    9.09
  -8  -4  12   69.25    7.42
  -8  -4  13   79.36    8.29
   8   4 -13  105.51   11.60
  -8  -4  14   40.99    5.94
   8   4 -14   59.32    8.68
   8   4 -15    1.45    3.74
  -8  -3   1  329.13   22.07
   8   3  -1  332.20   21.98
  -8  -3   2   49.63    4.84
  -8  -3   2   44.77    4.36
   8   3  -2   50.62    4.71
   8   3  -2   46.62    4.05
  -8  -3   3  109.64    8.91
  -8  -3   3   97.20    8.08
   8   3  -3  109.03    8.58
  -8  -3   4  593.82   39.56
  -8  -3   4  544.97   39.91
   8   3  -4  597.25   39.47
  -8  -3   5  187.76   14.27
  -8  -3   5  164.56   14.96
   8   3  -5  180.14   13.41
  -8  -3   6   29.23    4.00
  -8  -3   6   25.08    9.06
   8   3  -6   26.83    3.88
  -8  -3   7   47.27    5.37
  -8  -3   7   44.64    7.68
   8   3  -7   57.20    6.23
  -8  -3   8  285.21   21.05
  -8  -3   8  239.55   18.86
   8   3  -8  291.52   21.78
  -8  -3   9  252.09   18.83
   8   3  -9  241.91   18.27
  -8  -3  10   12.38    3.31
  -8  -3  10    9.81    3.35
   8   3 -10   12.26    3.63
  -8  -3  11   87.78    8.02
   8   3 -11  125.26   12.36
  -8  -3  12  154.23   13.51
  -8  -3  12  105.18    9.63
   8   3 -12  151.76   14.33
  -8  -3  13   39.49    5.70
  -8  -3  13   29.64    4.82
  -8  -3  13   30.78    5.33
   8   3 -13   45.78    7.18
  -8  -3  14   10.41    3.50
  -8  -3  14   13.09    4.89
   8   3 -14   18.97    5.51
   8   3 -16   72.39   10.01
  -8  -2   1   13.93    2.19
   8   2  -1   15.11    2.15
   8   2  -1   13.95    1.66
  -8  -2   2  426.77   28.08
   8   2  -2  430.21   28.05
   8   2  -3  505.25   32.76
  -8  -2   4   15.09    2.75
   8   2  -4   12.00    2.22
  -8  -2   5  102.82    8.48
   8   2  -5  102.62    8.45
  -8  -2   6  306.17   21.20
   8   2  -6  307.46   21.39
  -8  -2   7  531.73   35.62
   8   2  -7  526.67   35.21
   8   2  -8   60.92    6.51
  -8  -2   9  198.02   15.34
   8   2  -9  189.81   14.85
  -8  -2  10  275.55   21.17
  -8  -2  10  201.11   14.96
  -8  -2  10  217.95   17.07
   8   2 -10  283.75   22.64
  -8  -2  11   50.07    6.01
  -8  -2  11   33.56    4.36
   8   2 -11   50.51    6.97
  -8  -2  12    2.30    2.33
  -8  -2  12   -0.74    2.84
  -8  -2  12   -0.75    4.50
   8   2 -12   -2.20    2.61
  -8  -2  13  145.12   13.06
  -8  -2  13   95.99    8.23
  -8  -2  13  103.10   11.69
   8   2 -13  129.86   13.22
   8   2 -14  144.84   14.33
   8   2 -15    4.03    4.00
   8   2 -16   28.75    6.75
   8   2 -17   96.50   11.99
  -8  -1   1  759.82   48.59
   8   1  -1  749.61   47.24
  -8  -1   2  364.69   24.14
  -8  -1   3   88.74    7.27
   8   1  -3   80.93    6.35
  -8  -1   4  609.39   39.67
   8   1  -4  603.67   38.86
  -8  -1   5  685.86   44.71
   8   1  -5  671.35   43.18
  -8  -1   6  142.41   10.98
   8   1  -6  136.43   10.58
  -8  -1   7   63.00    6.04
   8   1  -7   61.26    6.15
  -8  -1   8  408.75   28.04
   8   1  -8  400.44   27.58
   8   1  -9  212.54   16.36
  -8  -1  10    2.38    1.93
   8   1 -10    2.73    2.54
  -8  -1  11  106.56    9.45
   8   1 -11  100.61   10.10
  -8  -1  12  140.51   11.69
   8   1 -12  148.23   13.65
  -8  -1  13   45.32    5.81
  -8  -1  13   26.83   11.52
   8   1 -13   47.77    7.27
  -8  -1  14    5.21    2.93
  -8  -1  14    2.06    2.62
   8   1 -15   98.59   11.42
   8   1 -15  105.32   12.88
   8   1 -16   68.38   10.09
   8   1 -16   97.59   12.34
   8   1 -17    5.45    4.56
  -8   0   1   46.09    4.08
   8   0  -1   37.92    3.10
  -8   0   2  123.81    8.90
   8   0  -2  121.65    8.59
  -8   0   3  334.27   22.20
   8   0  -3  325.81   21.25
  -8   0   4  234.89   16.29
   8   0  -4  221.80   15.07
  -8   0   5   -1.57    1.20
   8   0  -5   -0.15    1.29
  -8   0   6  422.87   28.35
   8   0  -6  411.34   27.35
  -8   0   7  635.94   41.94
   8   0  -7  614.00   40.12
  -8   0   8   24.73    3.43
   8   0  -8   24.27    3.86
  -8   0   9   94.27    8.18
   8   0  -9   83.76    7.92
  -8   0  10  189.77   14.44
   8   0 -10  177.24   14.32
  -8   0  11  174.91   13.70
   8   0 -11  165.51   14.04
  -8   0  12   18.23    3.56
   8   0 -13  105.28   11.15
  -8   0  14  113.24   10.46
   8   0 -14  117.07   12.44
   8   0 -14  124.64   12.79
   8   0 -15   36.72    7.22
   8   0 -15   30.73    7.04
   8   0 -16   -2.26    3.79
   8   0 -16    1.17    4.67
   8   0 -17   14.81    5.58
   8   0 -17   18.56    6.94
   8   0 -18   23.59    7.32
   8  -1  -1  376.96   23.88
  -8   1   2  548.11   35.37
   8  -1  -2  525.99   32.98
  -8   1   3   66.13    5.07
   8  -1  -3   69.02    5.47
  -8   1   4  157.25   11.13
   8  -1  -4  143.62   10.12
  -8   1   5  546.97   36.09
   8  -1  -5  507.19   32.41
  -8   1   6  263.92   18.01
   8  -1  -6  256.40   17.79
  -8   1   7   30.28    3.55
   8  -1  -7   23.10    3.45
  -8   1   8  424.47   28.58
   8  -1  -8  407.43   27.62
  -8   1   9  372.55   25.19
  -8   1  10   86.41    7.38
   8  -1 -10  100.31    9.73
   8  -1 -10   93.25    8.82
  -8   1  11   19.18    3.46
   8  -1 -11   21.06    4.37
   8  -1 -11   18.17    4.00
  -8   1  12  244.01   17.90
   8  -1 -12  250.18   20.02
   8  -1 -12  259.97   20.23
  -8   1  13  111.39    9.92
   8  -1 -13  124.49   12.58
   8  -1 -13  130.57   12.45
  -8   1  14    3.47    2.85
  -8   1  15   55.85    7.30
   8  -1 -15   56.46    8.62
   8  -1 -16   33.24    7.20
   8  -1 -16   44.23    8.23
   8  -1 -17   19.96    6.43
   8  -1 -18   -1.26    4.09
  -8   2   2  150.25   10.26
   8  -2  -2  130.13    8.30
   8  -2  -2  138.51    9.13
  -8   2   3  643.10   41.10
   8  -2  -3  638.41   40.58
   8  -2  -3  613.45   38.57
  -8   2   4  423.16   27.52
   8  -2  -4  411.80   26.60
   8  -2  -4  406.85   26.34
  -8   2   5    2.25    1.09
   8  -2  -5    2.18    1.47
   8  -2  -5    2.26    1.33
  -8   2   6  409.79   26.73
   8  -2  -6  407.16   26.98
   8  -2  -6  416.60   27.89
   8  -2  -7  365.88   24.88
  -8   2   8  269.95   18.34
   8  -2  -8  269.96   19.07
   8  -2  -8  295.74   21.06
  -8   2   9    0.38    1.58
   8  -2  -9    0.32    2.14
   8  -2  -9    0.06    2.11
  -8   2  10  214.99   15.71
   8  -2 -10  216.92   16.95
   8  -2 -10  220.86   16.40
   8  -2 -11  298.74   22.61
  -8   2  12   14.56    3.42
   8  -2 -12   14.09    4.35
   8  -2 -12   16.10    4.10
  -8   2  13   28.24    4.98
   8  -2 -13   27.85    5.43
   8  -2 -14  134.43   13.68
  -8   2  15   67.68    8.51
   8  -2 -15   63.90    9.13
   8  -2 -15   66.46    8.67
   8  -2 -16    5.07    4.57
   8  -2 -16    3.38    4.61
   8  -2 -17   21.81    6.45
   8  -2 -17   31.88    7.20
   8  -2 -18   82.04   11.71
   8  -3  -1  542.19   39.75
  -8   3   3  155.61   10.31
   8  -3  -3  160.33   10.50
   8  -3  -3  164.27   10.60
   8  -3  -4  108.59    7.73
  -8   3   5  362.85   22.74
   8  -3  -5  395.09   26.05
   8  -3  -5  417.31   27.64
  -8   3   6  128.86    9.07
   8  -3  -6  139.51   10.40
   8  -3  -6  151.33   10.79
  -8   3   7    6.67    1.84
   8  -3  -7    8.91    2.45
   8  -3  -7    7.58    1.88
   8  -3  -8  150.51   11.83
  -8   3   9  307.98   20.95
   8  -3  -9  319.95   22.89
   8  -3  -9  336.95   23.24
  -8   3  10  169.32   12.76
   8  -3 -10  186.49   15.24
   8  -3 -10  198.52   14.77
  -8   3  11    9.73    3.05
   8  -3 -11    9.39    3.70
   8  -3 -11    8.44    2.84
  -8   3  12  192.54   15.63
   8  -3 -12  174.82   15.00
   8  -3 -12  191.24   14.72
  -8   3  13  154.40   13.60
   8  -3 -13  139.06   13.22
   8  -3 -13  168.54   13.89
  -8   3  14   23.38    5.24
   8  -3 -14   19.62    5.43
   8  -3 -14   22.51    4.98
  -8   3  15    7.50    4.36
   8  -3 -15    6.36    4.56
   8  -3 -15    4.40    3.86
  -8   3  16  103.93   12.59
   8  -3 -16   80.98   10.70
   8  -3 -16  104.49   11.17
   8  -3 -17   49.76    9.14
   8  -3 -17   67.58    9.30
   8  -3 -18    0.33    4.52
   8  -3 -18   -0.34    5.31
   8  -4  -2   -7.17    4.77
   8  -4  -3  467.39   35.29
  -8   4   4  625.54   42.33
   8  -4  -4  535.20   32.67
   8  -4  -4  557.59   34.64
  -8   4   5   88.91    7.19
   8  -4  -5  101.96    7.55
   8  -4  -5  108.88    7.55
  -8   4   6    2.53    1.91
   8  -4  -6    0.47    1.43
   8  -4  -6    1.55    1.06
  -8   4   7  356.37   23.62
   8  -4  -7  399.29   26.52
   8  -4  -8  293.84   20.79
   8  -4  -8  293.60   19.35
  -8   4   9    5.21    2.47
   8  -4  -9   10.96    3.13
   8  -4  -9    9.82    2.22
  -8   4  10  168.06   13.64
  -8   4  11  295.81   22.20
   8  -4 -11  286.25   21.70
   8  -4 -11  307.23   21.29
   8  -4 -12   94.71   10.31
  -8   4  13    4.14    3.83
   8  -4 -13    4.88    3.79
   8  -4 -13    5.98    3.12
  -8   4  14   45.91    7.75
   8  -4 -14   50.71    8.07
   8  -4 -14   57.53    6.79
  -8   4  15   64.13    9.87
   8  -4 -15   64.77    9.83
   8  -4 -15   69.96    8.15
  -8   4  16   22.41    6.93
   8  -4 -16   12.08    6.01
   8  -4 -16   21.27    5.61
   8  -4 -17   11.21    5.81
   8  -4 -17   16.68    5.82
   8  -5  -1  233.99   18.19
   8  -5  -2  397.92   31.19
   8  -5  -4    4.32    3.81
  -8   5   6  556.13   37.83
   8  -5  -6  492.68   31.08
   8  -5  -6  508.01   31.89
  -8   5   7  133.26   10.77
   8  -5  -7  130.48   10.01
   8  -5  -7  129.42    8.76
  -8   5   8   51.73    6.39
   8  -5  -9  425.99   29.64
  -8   5  10  162.78   14.26
   8  -5 -10  155.03   13.04
   8  -5 -10  159.76   11.35
  -8   5  11   -1.59    3.11
   8  -5 -11    2.60    3.09
   8  -5 -11    3.31    2.15
  -8   5  12   45.39    7.01
   8  -5 -12   46.54    7.14
   8  -5 -12   49.87    5.32
  -8   5  13   92.92   10.69
   8  -5 -13   90.04   10.41
   8  -5 -13  107.04    9.28
  -8   5  14   53.87    8.91
   8  -5 -14   56.74    8.69
   8  -5 -14   61.57    6.95
   8  -5 -15    1.40    4.38
  -8   5  16   35.82    8.74
   8  -5 -16   28.98    7.73
   8  -5 -16   35.96    6.52
   8  -5 -17   25.70    7.62
   8  -5 -17   27.98    6.62
   8  -6  -3   87.00   16.09
   8  -6  -4  286.94   28.56
   8  -6  -5  318.26   25.23
   8  -6  -6    3.74    1.46
   8  -6  -6    3.87    1.45
   8  -6  -7  220.14   15.26
   8  -6  -7  231.95   15.69
  -8   6   8  296.27   22.09
   8  -6  -8  242.48   16.66
   8  -6  -8  275.18   18.54
  -8   6   9   11.82    3.98
   8  -6  -9   14.14    3.71
   8  -6  -9   13.16    2.45
  -8   6  10   81.82   10.08
   8  -6 -10   68.94    7.79
   8  -6 -10   61.80    5.24
  -8   6  11  138.87   14.45
   8  -6 -11  130.11   12.44
   8  -6 -11  131.73    9.78
  -8   6  12   92.96   12.42
   8  -6 -12   81.39    9.45
   8  -6 -12   83.56    7.23
  -8   6  13    3.09    5.94
   8  -6 -13    7.31    4.38
   8  -6 -13    7.03    3.07
  -8   6  14   46.37   10.69
   8  -6 -14   39.78    7.85
   8  -6 -14   49.03    6.36
  -8   6  15   92.23   13.98
   8  -6 -15   93.50   12.27
   8  -6 -15  103.91   10.23
   8  -6 -16    8.49    6.19
   8  -6 -16    4.45    4.36
   8  -7  -1   24.64    4.70
   8  -7  -2  188.16   16.97
   8  -7  -3  205.61   21.88
   8  -7  -6  438.63   34.32
   8  -7  -7  135.25    9.99
   8  -7  -8    5.87    2.51
   8  -7  -8    3.79    2.34
   8  -7  -9   55.79    5.65
   8  -7 -10  131.43   11.90
  -8   7  11   27.59    6.06
   8  -7 -11   30.34    5.88
   8  -7 -11   30.96    4.50
  -8   7  12   37.79    8.04
   8  -7 -12   33.01    4.76
  -8   7  13  174.90   19.33
   8  -7 -13  126.63   13.10
  -8   7  14   27.01    9.05
   8  -7 -14   26.00    6.87
   8  -7 -14   26.24    5.17
   8  -7 -15   -1.44    5.14
   8  -7 -15    2.44    4.19
   8  -8  -1  202.18   17.04
   8  -8  -2   68.78    9.46
   8  -8  -3    0.47    7.86
   8  -8  -4  202.11   29.17
   8  -8  -5  224.88   26.75
   8  -8  -6   -2.49    6.86
   8  -8  -8  100.25    8.45
   8  -8  -8   92.73    7.59
   8  -8  -9  102.83    9.63
   8  -8  -9   86.90    7.73
   8  -8 -10    2.20    3.41
   8  -8 -10    4.87    3.40
   8  -8 -11  100.43   10.68
   8  -8 -11   89.42    8.65
   8  -8 -12  157.34   15.04
   8  -8 -12  160.51   13.34
   8  -8 -13    6.70    5.32
   8  -8 -13    3.45    4.30
   8  -8 -14    3.66    4.79
   8  -8 -14    5.07    4.58
   8  -9  -1   -2.27    4.41
   8  -9  -2   75.54   11.35
   8  -9  -4   41.98   19.82
   8  -9  -5   17.59   19.85
   8  -9  -6   99.77   15.82
   8  -9  -7  148.69   15.19
   8  -9  -8   53.63    7.16
   8  -9  -9    9.92    3.43
   8  -9  -9    7.82    3.34
   8  -9 -10  103.95   10.10
   8  -9 -11   59.16    8.64
   8  -9 -12    1.85    5.24
   8  -9 -12   -0.25    4.22
   8 -10  -1  125.82   12.54
   8 -10  -2   56.47    9.95
   8 -10  -3   -5.31    9.05
   8 -10  -4   48.02   21.24
   8 -10  -6   21.43   14.44
   8 -10  -7    1.77    8.21
   8 -10  -8   53.13    8.68
   8 -10 -10   27.87    6.01
   8 -10 -10   25.47    5.75
   8 -11  -1   14.26    6.44
   8 -11  -2   18.50    8.12
   8 -11  -3   63.20   14.11
   8 -11  -4   24.25   20.07
   8 -11  -5   15.82   25.48
   8 -11  -6   11.60   16.72
   8 -11  -7   62.44   13.76
   8 -11  -8   38.22    8.75
   8 -12  -1   16.95    7.63
   8 -12  -2   13.51    9.13
   8 -12  -3   -1.59   11.37
   8 -12  -6   74.72   23.82
   8 -12  -7    2.72   12.55
   8 -12  -8   36.78    9.32
   8 -13  -1    3.60    7.24
   8 -13  -2    0.24    8.72
   8 -13  -3   11.60   12.85
   8 -13  -4   52.07   23.13
   8 -13  -6    5.41   22.16
   8 -13  -7   23.22   13.06
   8 -14  -1    8.11    7.19
   8 -14  -2   25.33   10.80
   8 -14  -4   -4.31   14.01
   8 -15  -1   24.31    9.68
  -7 -16   1   83.69   15.49
   7  16  -1   77.78    8.57
   7  16  -1   65.62    7.19
  -7 -16   2   42.32   10.29
   7  16  -2   38.08    6.74
  -7 -16   3   16.47    8.14
  -7 -16   4   10.90    6.92
  -7 -15   1   32.91    6.32
  -7 -15   1   24.19    9.60
   7  15  -1   29.12    5.37
  -7 -15   2    2.90    3.35
  -7 -15   2    5.97    7.97
   7  15  -2    3.39    3.28
   7  15  -2    2.26    3.23
  -7 -15   3   33.87    9.05
   7  15  -3   36.75    6.03
   7  15  -3   29.51    4.73
  -7 -15   4  120.29   14.21
   7  15  -4  131.26   12.68
   7  15  -4  109.74   10.76
  -7 -15   5   33.15    8.07
  -7 -15   6   14.92    6.15
   7  14  -1   -0.26    2.37
   7  14  -1    2.08    3.22
  -7 -14   2  128.32   15.00
   7  14  -2  147.59   13.15
   7  14  -2  118.39   10.67
  -7 -14   3  116.53   14.43
   7  14  -3  127.48   12.28
   7  14  -3  101.44    9.84
  -7 -14   4    1.51    5.90
   7  14  -4   -0.60    3.09
   7  14  -4    0.07    2.99
  -7 -14   5   34.62    7.97
   7  14  -5   36.74    6.13
  -7 -14   6   40.49    7.79
   7  14  -6   46.43    7.50
  -7 -14   7   34.39    7.39
  -7 -14   8    0.99    4.40
  -7 -14   9   37.52    7.02
  -7 -13   1  135.00   15.85
   7  13  -1  151.49   13.31
   7  13  -1  116.40   10.21
  -7 -13   2   17.24    7.02
   7  13  -2   18.04    3.79
   7  13  -2   21.20    4.75
  -7 -13   3   78.03   10.83
   7  13  -3   84.61    8.93
   7  13  -3   61.91    6.89
  -7 -13   4   95.60   11.60
   7  13  -4  110.09   10.86
   7  13  -4   94.48    9.34
  -7 -13   5   24.69    6.96
   7  13  -5   28.20    5.85
  -7 -13   6    3.79    5.09
   7  13  -6    5.26    3.61
  -7 -13   7   11.99    5.26
   7  13  -7   13.61    4.81
  -7 -13   8   83.27    9.72
  -7 -13  10   -0.65    3.99
  -7 -12   1    4.46    6.45
   7  12  -1    7.97    2.56
   7  12  -1    7.61    3.55
  -7 -12   2  121.02   14.29
   7  12  -2  119.21   10.17
   7  12  -2  117.31   10.95
  -7 -12   3   63.53    9.38
   7  12  -3   69.80    7.80
  -7 -12   4   11.61    5.73
   7  12  -4   12.94    3.66
   7  12  -4    6.49    3.73
   7  12  -5    4.71    3.01
  -7 -12   6   54.32    7.80
   7  12  -6   52.53    7.05
  -7 -12   7   39.85    6.88
  -7 -12   8    4.48    4.22
   7  12  -8    2.23    3.28
  -7 -12   9   12.21    4.48
   7  12  -9   22.83    6.01
  -7 -12  10   44.09    7.22
  -7 -11   1  184.06   14.74
  -7 -11   1  170.02   17.13
   7  11  -1  202.61   15.39
   7  11  -1  191.15   16.03
  -7 -11   2   70.30    7.66
  -7 -11   2   72.16   10.06
   7  11  -2   62.30    6.16
   7  11  -2   73.61    7.93
  -7 -11   3   -0.66    2.19
  -7 -11   3    1.38    5.01
   7  11  -3    1.94    2.07
   7  11  -3    1.00    3.28
  -7 -11   4   61.52    6.99
   7  11  -4   60.78    6.57
   7  11  -4   71.23    7.71
  -7 -11   5  135.33   12.14
  -7 -11   5  147.76   14.29
   7  11  -5  137.11   12.86
  -7 -11   6   39.61    6.46
   7  11  -6   52.99    6.88
  -7 -11   7   11.39    4.40
   7  11  -7   16.62    4.46
  -7 -11   8   71.02    8.41
   7  11  -8   88.07    9.92
  -7 -11   9   39.58    6.61
   7  11  -9   54.23    7.83
  -7 -11  10   13.51    5.31
   7  11 -10   19.46    5.77
  -7 -11  11    6.93    4.74
  -7 -11  13   46.65    8.15
  -7 -10   1    0.14    2.00
  -7 -10   1    4.55    6.20
   7  10  -1    1.64    1.87
  -7 -10   2   82.84    8.18
  -7 -10   2   70.55    9.75
   7  10  -2   81.08    7.48
   7  10  -2   68.98    6.97
  -7 -10   3  206.59   16.02
  -7 -10   3  207.97   18.59
   7  10  -3  242.77   18.59
   7  10  -3  186.20   14.74
  -7 -10   4  126.90   11.21
  -7 -10   4  117.86   11.89
   7  10  -4  127.13   10.72
   7  10  -4  119.67   10.84
  -7 -10   5    4.28    2.59
  -7 -10   5    2.57    3.97
   7  10  -5    3.27    2.35
   7  10  -5    3.17    2.90
  -7 -10   6  133.87   11.90
  -7 -10   6  125.82   11.77
   7  10  -6  150.53   13.04
   7  10  -7  244.80   19.00
  -7 -10   8   27.16    5.78
   7  10  -8   30.81    5.48
  -7 -10   9    4.49    4.22
   7  10  -9    8.31    3.81
  -7 -10  10   30.47    5.52
   7  10 -10   37.38    6.54
  -7 -10  11  115.63   11.19
   7  10 -11  144.62   14.52
  -7 -10  12   14.31    5.23
  -7 -10  13   31.34    6.18
  -7  -9   1  127.65   10.51
   7   9  -1  135.80   10.69
   7   9  -1  121.70   10.41
  -7  -9   2  301.43   21.41
  -7  -9   2  291.79   24.75
   7   9  -2  318.64   22.45
   7   9  -2  295.57   22.90
  -7  -9   3  117.93   10.01
  -7  -9   3  115.12   11.88
   7   9  -3  124.57   10.19
   7   9  -3  125.42   11.18
  -7  -9   4   62.79    6.77
  -7  -9   4   61.01    8.02
   7   9  -4   64.69    6.60
   7   9  -4   51.88    5.88
  -7  -9   5  166.18   13.19
  -7  -9   5  171.11   14.97
   7   9  -5  207.91   16.53
  -7  -9   6  111.79   10.25
  -7  -9   6  107.20   10.34
   7   9  -6  121.26   10.78
  -7  -9   7    1.51    2.46
  -7  -9   7    2.73    3.66
   7   9  -7    3.79    2.76
  -7  -9   8   32.16    5.32
  -7  -9   8   28.83    5.55
  -7  -9   9  116.90   11.33
   7   9  -9  130.66   12.34
  -7  -9  10   43.12    6.42
   7   9 -10   54.84    7.59
  -7  -9  11    5.56    4.32
   7   9 -11    9.75    4.38
  -7  -9  12   80.53    8.75
   7   9 -12  115.98   12.87
  -7  -9  13   70.73    8.69
  -7  -9  14    6.09    5.16
  -7  -8   1  419.85   34.79
   7   8  -1  415.59   27.48
   7   8  -1  429.44   32.61
  -7  -8   2   -0.14    1.72
  -7  -8   2    2.52    5.35
   7   8  -2    1.38    1.66
   7   8  -2    3.46    3.02
  -7  -8   3  245.12   17.94
  -7  -8   3  226.36   19.13
   7   8  -3  272.79   20.04
   7   8  -3  227.90   17.80
  -7  -8   4  329.11   23.34
  -7  -8   4  312.52   25.08
   7   8  -4  385.14   28.09
   7   8  -4  285.21   21.22
  -7  -8   5   26.41    4.26
  -7  -8   6   64.08    6.94
  -7  -8   6   67.69    7.81
   7   8  -6   77.36    7.82
  -7  -8   7  175.65   14.10
  -7  -8   7  184.99   15.87
   7   8  -7  202.55   16.24
  -7  -8   8  133.23   12.08
   7   8  -8  144.38   12.62
  -7  -8   9   17.60    4.23
  -7  -8   9   18.06    5.02
  -7  -8  10   94.65    9.46
   7   8 -10  115.01   11.66
  -7  -8  11  138.82   12.60
   7   8 -11  163.42   15.13
  -7  -8  12   14.44    4.78
   7   8 -12   11.44    4.93
  -7  -8  13    4.30    4.46
   7   8 -13    5.48    4.17
  -7  -8  14   17.07    5.25
  -7  -7   1  146.55   11.09
  -7  -7   1  151.23   16.30
   7   7  -1  164.52   12.43
   7   7  -1  137.85   10.97
  -7  -7   2  594.47   38.87
  -7  -7   2  592.30   45.84
   7   7  -2  647.28   43.49
   7   7  -2  576.36   42.17
  -7  -7   3  147.10   13.81
   7   7  -3  149.20   11.44
   7   7  -3  141.62   11.70
  -7  -7   4   20.20    3.46
  -7  -7   4   25.01    5.15
   7   7  -4   24.84    3.60
   7   7  -4   18.57    3.38
  -7  -7   5  280.50   21.95
   7   7  -5  321.91   23.12
  -7  -7   6  426.34   29.63
  -7  -7   6  422.67   32.34
   7   7  -6  450.27   31.20
  -7  -7   7   41.72    5.55
  -7  -7   7   40.06    5.76
   7   7  -7   47.32    5.83
   7   7  -8   55.54    6.61
  -7  -7   9  233.60   18.29
  -7  -7   9  220.65   18.51
   7   7  -9  231.23   18.23
  -7  -7  10  167.49   13.99
  -7  -7  10  168.07   14.57
  -7  -7  11    3.86    4.00
   7   7 -11    3.51    3.32
  -7  -7  12   54.66    6.84
   7   7 -12   59.82    8.05
  -7  -7  13   47.94    6.31
   7   7 -13   63.73    8.76
  -7  -7  14   26.08    5.09
   7   7 -14   39.43    7.42
  -7  -7  15    4.88    4.31
  -7  -6   1  608.92   39.21
  -7  -6   1  672.75   54.91
   7   6  -1  641.24   41.99
   7   6  -1  577.09   40.99
  -7  -6   2   14.25    5.98
   7   6  -2   12.40    2.90
  -7  -6   3  175.68   13.33
  -7  -6   3  169.15   15.27
   7   6  -3  202.01   15.30
   7   6  -3  150.22   11.50
  -7  -6   4  322.33   22.26
   7   6  -4  353.40   24.89
   7   6  -4  300.22   22.77
  -7  -6   5  159.19   12.24
  -7  -6   5  164.05   14.02
   7   6  -5  172.94   13.25
  -7  -6   6   20.96    3.53
  -7  -6   6   25.32    4.67
   7   6  -6   18.69    3.35
  -7  -6   7  176.73   13.94
  -7  -6   7  164.18   13.59
   7   6  -7  186.57   14.80
  -7  -6   8  357.41   26.14
  -7  -6   8  322.06   24.65
  -7  -6   9   58.15    6.81
   7   6  -9   56.83    6.73
  -7  -6  10   53.53    6.53
   7   6 -10   61.64    7.38
  -7  -6  11   71.74    7.86
  -7  -6  11   60.84    6.79
  -7  -6  12   98.64    9.22
   7   6 -12  118.69   12.07
  -7  -6  13    3.90    3.38
   7   6 -13    5.08    3.37
  -7  -6  14   61.62    7.04
   7   6 -14   78.07    9.88
   7   6 -15  177.90   16.91
  -7  -5   1  236.11   16.47
  -7  -5   1  255.88   25.17
   7   5  -1  237.46   16.26
   7   5  -1  218.38   16.13
  -7  -5   2  539.74   35.42
  -7  -5   2  533.20   42.53
   7   5  -2  554.24   36.47
   7   5  -2  520.38   37.99
  -7  -5   3  182.46   13.45
  -7  -5   3  186.64   17.05
   7   5  -3  175.82   12.56
   7   5  -3  173.16   13.50
  -7  -5   4   41.97    4.59
  -7  -5   5  143.18   11.29
  -7  -5   5  135.93   11.91
  -7  -5   6  283.23   21.53
   7   5  -6  330.51   23.76
  -7  -5   7  186.46   14.47
  -7  -5   7  175.06   14.35
   7   5  -7  179.29   13.69
  -7  -5   8    8.39    2.77
  -7  -5   8    6.59    3.34
   7   5  -8    9.18    2.78
  -7  -5   9  206.01   15.89
  -7  -5   9  190.39   15.09
   7   5  -9  223.38   17.72
  -7  -5  10  134.78   11.18
   7   5 -10  172.60   14.96
  -7  -5  11   48.92    5.96
  -7  -5  11   49.21    5.85
   7   5 -11   60.95    7.53
  -7  -5  12    9.26    3.11
  -7  -5  13   99.81    9.21
   7   5 -13  131.82   13.14
  -7  -5  14   79.65    7.97
   7   5 -14   98.98   11.21
  -7  -5  15    0.60    3.49
   7   5 -15    0.53    3.52
   7   5 -16   34.24    7.32
  -7  -4   1  725.51   56.62
   7   4  -1  745.47   47.95
   7   4  -1  716.00   51.84
  -7  -4   2  251.04   17.36
  -7  -4   2  298.71   28.11
   7   4  -2  226.54   16.36
  -7  -4   3    2.81    1.53
  -7  -4   3    3.93    5.10
   7   4  -3    4.19    1.56
   7   4  -3    2.61    1.62
  -7  -4   4  245.67   17.24
  -7  -4   4  236.82   19.47
   7   4  -4  253.18   17.74
  -7  -4   5  722.97   45.91
  -7  -4   5  799.97   60.85
  -7  -4   6    3.21    1.92
  -7  -4   6    4.46    2.90
   7   4  -6    1.51    1.54
  -7  -4   7  289.47   22.01
   7   4  -7  313.73   22.41
  -7  -4   8  318.93   22.48
   7   4  -8  320.76   22.68
  -7  -4   9   94.00    8.53
  -7  -4   9   85.04    7.65
   7   4  -9  105.30    9.82
  -7  -4  10   20.63    3.73
  -7  -4  10   16.45    3.10
   7   4 -10   21.09    4.18
  -7  -4  11  184.55   14.25
   7   4 -11  241.35   19.78
  -7  -4  12  236.73   18.67
  -7  -4  12  188.07   14.43
   7   4 -12  246.37   20.29
  -7  -4  13   43.62    5.84
  -7  -4  13   31.29    4.64
   7   4 -13   38.71    6.40
   7   4 -14   21.38    5.04
  -7  -4  15   72.97    7.58
   7   4 -16   26.47    6.32
  -7  -3   1   16.62    2.32
  -7  -3   1   18.81    3.37
   7   3  -1   16.78    2.15
  -7  -3   2  114.08    8.47
  -7  -3   2  115.32   11.02
   7   3  -2  128.12    9.56
  -7  -3   3  754.02   48.40
  -7  -3   3  713.55   53.46
   7   3  -3  793.80   51.83
  -7  -3   4  501.77   32.44
  -7  -3   4  571.14   45.55
   7   3  -4  500.86   32.04
  -7  -3   5   53.03    5.26
  -7  -3   5   51.74    6.58
   7   3  -5   51.74    5.03
  -7  -3   6  531.49   35.79
  -7  -3   6  485.05   35.35
   7   3  -6  523.58   34.96
  -7  -3   7  360.98   24.96
  -7  -3   7  338.59   25.13
   7   3  -7  363.40   25.24
  -7  -3   8   17.33    3.33
   7   3  -8   18.47    3.32
  -7  -3   9   58.94    6.20
  -7  -3   9   54.65    5.66
   7   3  -9   54.45    6.06
  -7  -3  10  560.49   38.23
   7   3 -10  542.10   36.70
  -7  -3  11  217.30   17.26
  -7  -3  11  162.24   12.19
   7   3 -11  209.63   17.27
  -7  -3  12   13.07    3.25
  -7  -3  12   10.53    2.93
   7   3 -12    9.32    3.36
  -7  -3  13  242.15   19.38
  -7  -3  13  173.66   13.26
   7   3 -13  216.13   18.20
  -7  -3  14   56.08    5.95
   7   3 -14   75.09    9.30
  -7  -3  15    2.47    2.93
   7   3 -15    3.46    3.51
  -7  -3  16   10.29    4.09
  -7  -3  16    9.67    4.64
   7   3 -16   10.74    4.45
   7   3 -17   31.36    6.98
  -7  -2   1  564.38   37.16
   7   2  -1  511.86   36.33
  -7  -2   2  533.62   34.56
   7   2  -2  526.83   33.57
  -7  -2   3   31.66    3.43
  -7  -2   3   32.81    2.97
   7   2  -3   29.58    3.09
  -7  -2   4  645.60   46.60
   7   2  -4  711.56   46.60
  -7  -2   5  574.07   37.56
   7   2  -5  571.85   37.11
  -7  -2   6   60.42    5.76
  -7  -2   6   48.61    5.47
   7   2  -6   52.39    5.18
  -7  -2   7    7.88    2.14
  -7  -2   7    6.17    2.29
   7   2  -7    6.41    2.14
  -7  -2   8  392.54   27.33
  -7  -2   8  336.93   24.01
   7   2  -8  395.06   27.78
  -7  -2   9  514.44   36.84
   7   2  -9  592.98   40.92
  -7  -2  10    8.42    2.61
  -7  -2  10    6.78    2.25
   7   2 -10    7.24    2.76
  -7  -2  11  274.35   20.37
  -7  -2  11  230.37   16.91
   7   2 -11  276.37   21.35
  -7  -2  12  231.23   18.26
  -7  -2  12  147.40   12.07
   7   2 -12  242.39   20.27
  -7  -2  13   38.11    5.16
  -7  -2  13   28.00    4.02
  -7  -2  13   26.47    4.86
   7   2 -13   35.47    5.80
  -7  -2  14    8.71    2.88
  -7  -2  14    8.28    3.06
  -7  -2  15   22.01    3.82
  -7  -2  15   22.67    6.08
   7   2 -15   27.41    5.87
  -7  -2  16   32.33    4.66
  -7  -2  16   29.22    7.33
   7   2 -16   35.16    6.73
   7   2 -17    8.05    4.59
  -7  -1   1  194.17   13.28
   7   1  -1  185.24   12.21
  -7  -1   2  103.19    7.68
   7   1  -2   99.63    7.18
  -7  -1   3  797.49   50.92
  -7  -1   4  453.40   29.94
   7   1  -4  435.15   28.02
   7   1  -5   73.64    6.20
  -7  -1   6  141.46   10.55
   7   1  -6  142.64   10.77
  -7  -1   7  338.49   23.14
   7   1  -7  331.68   22.64
  -7  -1   8  305.47   22.20
  -7  -1   8  242.69   17.94
  -7  -1   9   81.87    7.41
  -7  -1   9   74.36    6.30
  -7  -1   9   71.31    7.15
   7   1  -9   74.26    7.23
  -7  -1  10  403.73   28.87
  -7  -1  10  313.34   21.71
   7   1 -10  389.00   28.10
  -7  -1  11  112.86    9.95
  -7  -1  11   94.12    7.75
  -7  -1  11   78.56    8.06
   7   1 -11  100.16    9.69
  -7  -1  12    0.68    1.78
  -7  -1  12    0.62    2.13
  -7  -1  12    1.45    3.98
  -7  -1  13    6.89    2.58
  -7  -1  13    5.89    5.10
   7   1 -13    7.73    3.25
  -7  -1  14  125.40   11.08
  -7  -1  14  106.43   12.92
   7   1 -14  110.77   11.37
  -7  -1  15   76.08    8.29
  -7  -1  15   59.03    5.92
  -7  -1  15   64.91   11.13
   7   1 -15   87.02   10.50
  -7  -1  16    0.46    2.87
   7   1 -16    0.13    2.68
   7   1 -16    0.24    4.51
   7   1 -17   26.25    6.37
   7   1 -17   30.94    7.38
   7   1 -18   15.13    5.64
  -7   0   1  486.01   31.25
   7   0  -1  474.36   29.81
  -7   0   2  828.47   52.94
   7   0  -2  799.02   49.64
  -7   0   3  129.24    9.21
   7   0  -3  124.65    8.75
  -7   0   4  152.87   10.79
  -7   0   5  282.37   19.50
   7   0  -5  256.44   17.05
   7   0  -6  431.59   28.59
  -7   0   7   24.84    3.08
   7   0  -7   25.21    3.36
  -7   0   8  146.08   10.98
   7   0  -8  139.14   10.88
  -7   0   9  331.36   22.69
  -7   0  10   24.47    3.47
  -7   0  10   22.56    7.20
   7   0 -10   28.13    4.42
  -7   0  11   16.44    3.01
  -7   0  11   13.26    2.14
   7   0 -11   15.10    3.74
  -7   0  12  122.54   10.39
  -7   0  12   99.46    7.62
   7   0 -12  123.53   11.72
  -7   0  13  138.86   11.66
  -7   0  13  113.27    8.85
  -7   0  13  133.19   20.33
   7   0 -13  137.61   12.96
  -7   0  14   16.00    3.54
   7   0 -14   24.66    5.34
   7   0 -14   21.88    5.07
  -7   0  15   30.86    4.90
  -7   0  15   29.21    3.97
  -7   0  15   31.19   17.81
   7   0 -15   27.01    6.00
   7   0 -15   35.79    6.56
  -7   0  16   39.52    4.63
  -7   0  16   54.88   20.61
   7   0 -16   76.63   10.22
   7   0 -17    7.52    4.30
   7   0 -17    5.53    5.31
   7   0 -18   -0.35    3.32
  -7   1   1  406.50   26.43
   7  -1  -1  372.54   22.95
  -7   1   2   72.85    5.37
   7  -1  -2   67.18    4.82
  -7   1   3  650.19   42.35
   7  -1  -3  596.08   36.88
  -7   1   4  256.38   17.36
   7  -1  -4  233.32   15.26
  -7   1   5   28.44    2.90
  -7   1   6   59.85    5.02
   7  -1  -6   59.35    5.34
  -7   1   7  472.37   31.09
   7  -1  -7  458.79   30.20
  -7   1   8  176.99   12.73
   7  -1  -8  174.83   13.19
  -7   1   9   31.17    3.68
   7  -1  -9   27.74    4.00
  -7   1  10   90.57    7.52
   7  -1 -10   96.76    9.06
   7  -1 -11  195.62   15.64
  -7   1  12   95.17    8.41
  -7   1  12   89.78    7.17
  -7   1  12   73.44    6.35
   7  -1 -12  110.88   11.01
   7  -1 -12  106.20    9.99
  -7   1  13   19.90    3.64
  -7   1  13   52.88    5.28
   7  -1 -13   19.19    4.16
  -7   1  14  121.43    9.41
  -7   1  14  129.48   14.99
   7  -1 -14  157.99   15.14
  -7   1  15   65.15    7.54
  -7   1  15   45.94    4.54
  -7   1  15   55.48   13.14
   7  -1 -15   58.28    8.22
   7  -1 -15   76.84    9.26
  -7   1  16    0.86    2.15
  -7   1  16   -0.46   12.16
   7  -1 -16    1.05    3.57
   7  -1 -16    0.30    4.28
   7  -1 -17   11.29    4.61
   7  -1 -17    3.89    4.68
   7  -1 -18   17.14    5.61
   7  -1 -18   15.58    6.28
   7  -1 -19   18.86    6.51
  -7   2   1  904.57   56.60
  -7   2   2  445.96   28.71
   7  -2  -2  426.40   26.79
   7  -2  -2  416.71   26.10
   7  -2  -3   35.93    2.99
   7  -2  -3   37.35    3.18
  -7   2   4   20.00    2.07
   7  -2  -4   17.65    2.10
   7  -2  -4   18.83    2.03
  -7   2   5  363.82   24.02
   7  -2  -5  350.72   23.05
   7  -2  -5  342.36   22.56
  -7   2   6  373.26   24.00
   7  -2  -6  395.30   26.89
   7  -2  -6  388.56   26.10
  -7   2   7   69.91    5.74
   7  -2  -7   64.61    5.83
   7  -2  -7   68.47    5.75
  -7   2   8   13.21    2.26
   7  -2  -8   11.48    2.51
   7  -2  -8   13.12    2.46
  -7   2   9  137.36   10.43
   7  -2  -9  133.60   10.98
   7  -2  -9  131.55   10.05
  -7   2  10  131.45    9.94
   7  -2 -10  145.53   11.48
  -7   2  11   18.12    3.10
   7  -2 -11   21.46    4.26
   7  -2 -11   23.56    3.93
  -7   2  12   73.94    7.06
   7  -2 -12   75.24    8.18
   7  -2 -12   80.28    7.76
  -7   2  13  222.13   17.35
  -7   2  13  163.57   11.19
   7  -2 -13  226.70   19.17
   7  -2 -13  237.35   18.73
  -7   2  14   54.45    6.64
   7  -2 -14   57.43    7.83
   7  -2 -14   53.01    6.91
  -7   2  15   22.86    4.83
  -7   2  15   13.51    2.54
   7  -2 -15   20.25    5.44
   7  -2 -15   23.79    5.41
  -7   2  16   44.68    6.64
   7  -2 -16   37.31    6.96
   7  -2 -17   60.56    9.20
   7  -2 -17   66.31    8.92
   7  -2 -18   19.37    6.06
   7  -2 -19   12.07    5.39
   7  -3  -1  217.54   16.27
   7  -3  -2   13.97    3.86
  -7   3   3   62.08    4.46
   7  -3  -3   68.30    4.90
   7  -3  -3   67.56    4.54
  -7   3   4  769.41   49.13
   7  -3  -4  748.39   46.91
   7  -3  -4  753.43   47.07
  -7   3   5  135.65    9.11
   7  -3  -5  152.31   10.90
   7  -3  -5  151.69   10.31
  -7   3   6   17.95    2.29
   7  -3  -6   18.69    2.67
   7  -3  -6   17.17    2.06
  -7   3   7  154.56   10.83
   7  -3  -7  159.10   11.79
   7  -3  -7  169.04   11.90
   7  -3  -8  186.56   13.92
  -7   3   9  177.27   12.38
   7  -3  -9  198.04   15.18
   7  -3  -9  201.78   14.46
  -7   3  10    2.90    1.79
   7  -3 -10    2.92    2.31
   7  -3 -10    3.26    2.05
  -7   3  11  134.90   10.88
   7  -3 -11  126.15   11.07
   7  -3 -11  135.77   10.60
  -7   3  12  117.44   10.15
   7  -3 -12  118.28   11.11
   7  -3 -12  122.07   10.04
  -7   3  13    1.67    2.32
   7  -3 -13    0.78    2.69
   7  -3 -13    1.35    2.52
  -7   3  14   45.57    6.36
   7  -3 -14   32.49    6.11
   7  -3 -14   47.71    6.03
  -7   3  15   85.30    9.58
   7  -3 -15   73.82    9.23
   7  -3 -15   82.14    8.64
  -7   3  16   48.36    7.34
   7  -3 -16   46.81    7.82
   7  -3 -16   52.53    7.31
   7  -3 -17    3.05    4.46
   7  -3 -18   15.63    5.61
   7  -3 -18   20.82    6.06
   7  -3 -19   23.70    7.17
   7  -4  -1   39.45    3.98
   7  -4  -2  511.44   38.22
  -7   4   4    8.14    1.60
   7  -4  -4   10.70    1.51
   7  -4  -4   10.37    1.10
   7  -4  -4    9.43    2.18
  -7   4   5   81.34    6.55
   7  -4  -5   81.68    6.18
   7  -4  -5   83.66    5.68
  -7   4   6  246.87   16.35
   7  -4  -6  273.80   18.85
   7  -4  -6  272.21   17.82
  -7   4   7  270.22   18.19
   7  -4  -7  293.96   19.45
  -7   4   8    0.45    1.63
   7  -4  -8    0.91    1.77
   7  -4  -8    2.41    1.36
  -7   4   9   84.94    7.33
   7  -4  -9   99.51    8.98
   7  -4  -9   96.41    7.31
  -7   4  10  230.77   16.90
   7  -4 -10  235.99   17.87
   7  -4 -10  237.45   16.25
  -7   4  11   43.09    5.34
   7  -4 -11   50.06    4.89
  -7   4  12   34.93    5.45
   7  -4 -12   35.85    5.58
   7  -4 -12   29.41    4.03
  -7   4  13   92.64    9.41
   7  -4 -13   98.55   10.46
   7  -4 -13   95.55    8.18
  -7   4  14   24.78    5.42
   7  -4 -14   23.08    4.14
  -7   4  15   11.38    5.21
   7  -4 -15    9.57    4.33
  -7   4  16    9.47    4.55
   7  -4 -16    3.11    3.82
   7  -4 -16    2.52    3.43
   7  -4 -17   48.31    8.54
   7  -4 -17   67.55    8.59
   7  -4 -18   26.41    6.85
   7  -4 -18   35.13    6.89
   7  -4 -19    2.87    4.73
   7  -5  -1  347.22   26.06
   7  -5  -2  126.83   11.29
   7  -5  -3  154.09   16.37
   7  -5  -4  168.13   10.60
   7  -5  -4  190.27   19.29
   7  -5  -5  180.80   12.38
   7  -5  -5  172.53   13.86
  -7   5   6   98.89    7.74
   7  -5  -6  111.35    8.63
   7  -5  -6  103.33    6.95
  -7   5   7    2.47    2.17
   7  -5  -7    3.29    1.82
   7  -5  -7    1.68    1.12
  -7   5   8  324.94   22.93
   7  -5  -8  347.32   24.46
   7  -5  -8  321.24   20.40
  -7   5   9  152.92   11.51
   7  -5  -9  191.31   15.22
  -7   5  10    1.07    1.41
   7  -5 -10    2.01    2.38
   7  -5 -10    2.08    1.64
  -7   5  11   45.17    6.22
  -7   5  11   27.23    2.61
   7  -5 -11   46.32    6.33
   7  -5 -11   48.42    4.83
  -7   5  12   74.88    8.77
  -7   5  12   49.00    4.29
  -7   5  13   20.46    4.94
  -7   5  13   12.35    2.42
   7  -5 -13   19.96    5.02
   7  -5 -13   24.40    3.84
  -7   5  14    2.72    3.52
   7  -5 -14    3.27    3.21
   7  -5 -14    0.38    2.60
  -7   5  15   40.81    7.58
   7  -5 -15   40.26    7.11
   7  -5 -15   44.24    5.58
  -7   5  16   56.18    9.29
   7  -5 -16   53.70    8.95
   7  -5 -16   56.18    7.07
  -7   5  17    2.34    4.86
   7  -5 -17    8.08    4.89
   7  -5 -17    7.84    4.25
   7  -5 -18   14.94    5.80
   7  -5 -18   10.51    5.35
   7  -6  -1    0.62    2.95
   7  -6  -3  164.04   16.47
   7  -6  -5    7.97    1.50
   7  -6  -5    6.23    1.23
   7  -6  -5    7.32    6.39
  -7   6   6  146.30   12.50
   7  -6  -6  149.41   10.80
   7  -6  -6  146.72    9.99
   7  -6  -6  137.69   11.80
  -7   6   7  171.75   12.72
   7  -6  -7  176.81   13.09
   7  -6  -7  161.38   10.60
  -7   6   8    5.76    2.64
  -7   6   8    6.88    2.40
   7  -6  -8    6.43    1.64
  -7   6   9   85.13    8.94
  -7   6   9   61.80    5.61
   7  -6  -9   83.49    8.30
   7  -6  -9   72.94    5.67
  -7   6  10  145.62   13.26
  -7   6  11   57.56    8.25
   7  -6 -11   62.28    7.40
   7  -6 -11   56.93    4.99
  -7   6  12   21.82    5.65
   7  -6 -12   27.37    5.31
   7  -6 -12   21.77    3.21
  -7   6  13    4.17    4.33
   7  -6 -13    3.30    3.42
   7  -6 -13    4.56    2.56
  -7   6  14   74.88   10.80
   7  -6 -14   64.68    8.77
   7  -6 -14   65.94    6.40
  -7   6  15   28.28    7.77
   7  -6 -15   25.57    6.25
   7  -6 -15   27.24    4.66
  -7   6  16   10.07    6.48
   7  -6 -16   -0.28    4.73
   7  -6 -16   -0.39    3.55
  -7   6  17   24.32    8.72
   7  -6 -17   28.05    5.88
   7  -6 -18   28.26    7.64
   7  -6 -18   30.47    6.59
   7  -7  -1  344.14   26.50
   7  -7  -2   60.32    7.18
   7  -7  -3   20.85    7.07
   7  -7  -4  147.57   20.07
  -7   7   5  382.08   31.91
   7  -7  -5  343.21   21.52
  -7   7   6  133.89   11.11
   7  -7  -6  158.39   11.60
  -7   7   7   35.64    4.59
   7  -7  -7   42.45    4.71
   7  -7  -7   35.24    3.64
   7  -7  -7   35.26    5.38
  -7   7   8   80.99    7.35
   7  -7  -8   99.71    9.02
   7  -7  -8   92.20    7.31
  -7   7   9   98.61    9.88
  -7   7   9   70.70    6.63
   7  -7  -9   88.96    8.57
   7  -7  -9   83.81    6.80
  -7   7  10   80.43    8.66
  -7   7  10   58.17    5.88
   7  -7 -10   80.25    8.55
   7  -7 -10   71.76    6.21
  -7   7  11    0.33    3.74
  -7   7  11    1.82    3.16
   7  -7 -11    1.97    2.63
   7  -7 -11   -0.26    1.98
  -7   7  12   75.86   10.47
  -7   7  12   33.93    4.68
   7  -7 -12   58.14    8.31
   7  -7 -12   50.71    5.27
   7  -7 -13  100.96   11.18
  -7   7  14   12.22    6.44
   7  -7 -14    9.80    4.68
   7  -7 -14    9.51    3.24
  -7   7  15   15.11    7.66
   7  -7 -15    7.78    5.20
   7  -7 -15   14.95    4.14
  -7   7  16  104.11   16.34
   7  -7 -16   78.75   11.63
   7  -7 -16   63.44    7.47
  -7   7  17   33.76   11.50
   7  -7 -17   24.04    7.93
   7  -7 -17   37.54    6.50
   7  -8  -1   25.98    4.89
   7  -8  -2   51.20    7.43
   7  -8  -3  230.91   21.21
   7  -8  -4  221.24   26.31
   7  -8  -5    2.07   15.37
  -7   8   6  108.92    9.90
   7  -8  -6  115.36    8.66
   7  -8  -6  105.99    7.90
   7  -8  -6  133.55   18.07
  -7   8   7  181.73   15.48
   7  -8  -7  181.72   13.47
   7  -8  -7  157.48   10.95
  -7   8   8   77.39    7.82
   7  -8  -8   85.38    7.88
   7  -8  -8   71.01    6.28
   7  -8  -8   72.30    8.14
  -7   8   9   -0.61    3.26
   7  -8  -9    2.32    2.57
   7  -8  -9    3.50    2.63
  -7   8  10   11.12    4.03
   7  -8 -10   24.60    4.85
  -7   8  11  124.05   10.24
   7  -8 -11  181.63   16.24
   7  -8 -11  171.70   13.54
  -7   8  12  130.86   13.82
  -7   8  12   59.69    6.41
   7  -8 -12   95.39    8.93
  -7   8  13    5.94    4.95
  -7   8  13    3.78    3.79
   7  -8 -13    4.93    4.03
   7  -8 -13    4.57    3.42
  -7   8  14   68.50   10.94
   7  -8 -14   53.03    8.78
   7  -8 -14   48.98    6.47
  -7   8  15   88.66   13.83
   7  -8 -15   69.90    7.98
   7  -8 -16   21.90    7.83
   7  -8 -16   16.70    5.18
   7  -9  -1   84.33    9.15
   7  -9  -2  234.95   20.98
   7  -9  -3   78.58   11.26
   7  -9  -4   28.61   12.84
  -7   9   5  119.49   11.15
  -7   9   6   60.61    6.90
   7  -9  -6   64.43    5.43
   7  -9  -6   58.41    4.90
  -7   9   7   10.17    4.06
   7  -9  -7   11.79    2.56
   7  -9  -7   10.95    2.73
   7  -9  -7    9.61    8.93
  -7   9   8   22.05    4.56
   7  -9  -8   23.54    3.88
   7  -9  -8   21.83    3.83
   7  -9  -8   26.22    6.29
  -7   9   9  101.11    9.33
   7  -9  -9  135.92   12.00
   7  -9  -9  120.99   10.46
   7  -9  -9  120.19   11.97
   7  -9 -10   81.10    8.67
   7  -9 -11   -0.23    3.26
   7  -9 -11    0.46    3.55
   7  -9 -12   94.94   10.99
   7  -9 -12   74.69    8.39
   7  -9 -13   91.76   11.12
   7  -9 -13   83.84    9.16
   7  -9 -14   50.00    8.92
   7  -9 -14   45.00    7.14
   7  -9 -15    3.51    4.39
   7 -10  -1  152.04   13.85
   7 -10  -2   -3.13    5.50
   7 -10  -3   56.95   10.49
  -7  10   5   23.65    4.60
  -7  10   6    6.04    3.61
  -7  10   7  107.22   10.15
   7 -10  -7  114.19    9.15
   7 -10  -7  112.15    9.16
   7 -10  -7  119.40   17.80
  -7  10   8  127.98   11.45
   7 -10  -8  165.18   13.55
   7 -10  -8  142.27   11.75
   7 -10  -8  142.59   15.64
  -7  10   9   51.91    6.61
   7 -10  -9   51.35    6.62
   7 -10  -9   59.90    8.82
  -7  10  10   19.73    4.86
   7 -10 -10   25.28    5.19
   7 -10 -10   20.53    4.88
  -7  10  11   89.61    9.33
   7 -10 -11  114.95   11.75
   7 -10 -11  110.89   11.56
  -7  10  12   28.63    5.67
   7 -10 -12   40.45    7.37
   7 -10 -12   43.18    7.17
   7 -10 -13   18.11    6.17
   7 -10 -13   13.75    5.27
   7 -11  -1   34.81    6.61
   7 -11  -2  117.50   13.35
   7 -11  -4   13.07   12.64
  -7  11   5   32.97    5.45
   7 -11  -5   41.66   21.91
   7 -11  -6  163.19   11.00
   7 -11  -6  243.01   37.94
  -7  11   7   57.83    7.37
   7 -11  -7   62.15    5.93
   7 -11  -7   63.70   16.68
  -7  11   8    4.74    4.29
   7 -11  -8    8.53    3.26
   7 -11  -8    4.99    3.47
   7 -11  -8    3.50    8.74
  -7  11   9   79.74    8.99
   7 -11  -9   84.26    8.80
   7 -11  -9   84.31    9.46
   7 -11  -9   84.99   11.70
  -7  11  10   82.83    8.95
   7 -11 -10  102.70   10.99
   7 -11 -10   94.66   10.69
   7 -11 -10   85.08   10.17
  -7  11  11    7.69    4.38
   7 -11 -11   14.16    5.42
   7 -11 -11   15.16    5.56
   7 -12  -1   85.89   10.57
   7 -12  -2   25.57    8.46
   7 -12  -5  119.08   28.87
  -7  12   6    1.00    3.49
   7 -12  -6    0.02   24.02
  -7  12   7   46.51    6.61
   7 -12  -7   53.67   18.27
  -7  12   8  103.13   10.55
   7 -12  -8  118.58   10.66
   7 -12  -8  100.44    9.30
   7 -12  -8  122.19   18.56
  -7  12   9   20.21    5.42
   7 -12  -9   23.12    5.70
   7 -12  -9   15.84    5.80
  -7  12  10    5.35    4.23
   7 -12 -10    4.33    5.42
   7 -13  -1   -3.31    6.54
   7 -13  -2   59.12   11.00
   7 -13  -4   25.04   15.82
   7 -13  -5   22.64   20.59
  -7  13   6   62.87    7.90
   7 -13  -6   70.32   26.95
  -7  13   7   54.60    7.24
   7 -13  -7   79.79   21.43
  -7  13   8   -1.88    3.69
   7 -13  -8    5.05   10.91
  -7  13   9   27.27    5.69
   7 -13  -9   31.45    9.20
   7 -14  -1   40.55    8.55
   7 -14  -2   33.84    9.61
   7 -14  -3   -1.10    9.35
   7 -14  -5   68.41   24.07
   7 -14  -6    4.07   20.98
  -7  14   7   11.96    4.05
   7 -14  -7   15.64   15.02
   7 -14  -8   33.48   12.87
   7 -15  -1   19.16    7.32
   7 -15  -2    2.09    8.10
   7 -15  -3   59.75   13.45
   7 -15  -4   32.44   14.44
   7 -15  -5    4.09   12.82
  -6 -16   1   62.41   11.35
   6  16  -1   90.00    9.59
   6  16  -1   59.06    6.67
  -6 -16   2   11.14    6.44
   6  16  -2   12.15    4.21
  -6 -16   3    0.04    5.80
   6  16  -3    4.85    3.43
  -6 -16   4   35.24    7.81
  -6 -15   1    7.02    4.01
  -6 -15   1    4.63    6.15
   6  15  -1    9.87    3.89
   6  15  -1    5.83    3.68
  -6 -15   2   60.62    8.41
  -6 -15   2   52.45    9.44
   6  15  -2   48.00    6.39
  -6 -15   3  131.01   13.45
  -6 -15   3  117.60   13.49
   6  15  -3  130.82   12.39
   6  15  -3  102.66    9.56
   6  15  -4   44.30    6.70
   6  15  -4   43.00    5.81
  -6 -15   5   17.55    6.01
   6  15  -5   20.02    5.27
  -6 -15   6  120.17   12.47
  -6 -15   7   51.22    7.57
  -6 -14   1  158.63   14.75
   6  14  -1  154.20   13.02
   6  14  -1  120.05   10.66
  -6 -14   2  130.92   12.95
  -6 -14   2  114.57   12.59
   6  14  -2  130.62   11.73
   6  14  -2  105.37    9.54
  -6 -14   3   -0.43    3.10
  -6 -14   3    0.75    5.01
   6  14  -3    2.62    2.72
   6  14  -3    1.38    3.00
  -6 -14   4   74.46    8.96
  -6 -14   4   80.87    9.74
   6  14  -4   97.51   10.17
  -6 -14   5  125.21   12.43
  -6 -14   5  134.17   13.24
   6  14  -5  157.67   14.63
  -6 -14   6   15.26    5.15
   6  14  -6   13.70    4.66
  -6 -14   7   16.87    5.03
   6  14  -7   15.70    5.46
  -6 -14   9   40.71    6.51
  -6 -13   1   18.10    4.47
  -6 -13   1   22.25    6.68
   6  13  -1   22.17    3.89
   6  13  -1   21.09    4.34
  -6 -13   2   49.17    6.86
  -6 -13   2   34.49    7.00
   6  13  -2   36.81    5.58
  -6 -13   3  216.00   17.41
  -6 -13   3  218.82   19.23
   6  13  -3  257.81   20.17
   6  13  -3  211.18   17.44
  -6 -13   4   64.60    8.31
   6  13  -4   67.13    7.57
   6  13  -4   65.64    7.30
   6  13  -5    1.44    2.93
   6  13  -5    0.94    2.56
  -6 -13   6   24.58    5.17
   6  13  -6   21.10    5.23
  -6 -13   7   46.56    6.68
   6  13  -7   62.67    8.25
  -6 -13   8   38.85    6.13
   6  13  -8   49.49    7.75
  -6 -13  10   60.02    7.81
  -6 -13  11   89.92   10.15
  -6 -12   1  242.73   19.17
  -6 -12   1  210.25   18.73
   6  12  -1  244.35   17.98
   6  12  -1  222.90   18.12
  -6 -12   2  291.56   22.10
  -6 -12   2  273.67   22.92
   6  12  -2  314.37   22.86
   6  12  -2  282.33   22.53
  -6 -12   3   47.87    7.07
   6  12  -3   46.28    5.55
  -6 -12   4  101.99   10.49
   6  12  -4  106.30   10.03
  -6 -12   5  156.54   14.09
   6  12  -5  178.29   15.13
   6  12  -5  147.11   13.29
  -6 -12   6   65.56    7.64
   6  12  -6   80.81    8.89
  -6 -12   7    7.98    4.23
   6  12  -7    6.75    3.57
  -6 -12   8   33.96    5.69
   6  12  -8   43.07    7.17
   6  12  -9  256.03   21.08
  -6 -12  10   41.52    6.20
   6  12 -10   48.01    8.29
  -6 -12  12   39.19    6.30
  -6 -11   1  128.70   13.62
   6  11  -1  109.78    8.78
   6  11  -1  122.22   11.02
  -6 -11   2   67.49    8.67
   6  11  -2   71.11    6.89
   6  11  -2   59.03    6.58
   6  11  -3  156.11   12.92
   6  11  -3  114.58    9.85
   6  11  -4  216.62   16.04
   6  11  -4  230.08   19.26
  -6 -11   5   63.97    7.52
   6  11  -5   66.13    7.06
   6  11  -5   67.83    7.50
  -6 -11   6   25.95    5.29
  -6 -11   7  219.45   17.95
   6  11  -7  261.01   20.78
  -6 -11   8  132.00   12.20
   6  11  -8  136.59   12.74
  -6 -11   9   11.15    4.10
   6  11  -9   11.54    4.34
  -6 -11  10   89.42    9.32
   6  11 -10  108.50   11.84
  -6 -11  11   77.02    8.45
   6  11 -11   84.21   10.81
  -6 -11  12   26.77    5.65
  -6 -11  13    2.46    4.04
  -6 -10   1  155.05   14.73
   6  10  -1  169.70   12.74
  -6 -10   2  414.51   32.98
   6  10  -2  419.39   28.26
  -6 -10   3   80.17    8.88
   6  10  -3   77.25    7.88
  -6 -10   4   14.21    3.56
  -6 -10   4   13.11    4.19
   6  10  -4   15.45    3.19
   6  10  -4   14.18    3.80
  -6 -10   5  125.61   11.26
  -6 -10   5  127.87   11.88
   6  10  -5  132.53   11.13
   6  10  -5  129.02   11.85
  -6 -10   6  305.31   22.48
  -6 -10   6  299.40   23.56
   6  10  -6  339.69   25.10
  -6 -10   7   83.47    8.55
   6  10  -7   91.45    9.11
  -6 -10   8   83.93    8.88
   6  10  -8   79.36    8.53
  -6 -10   9  125.39   11.54
   6  10  -9  136.30   12.80
   6  10 -10   54.17    7.54
  -6 -10  11    1.88    3.87
   6  10 -11   -0.05    3.16
  -6 -10  12   52.48    6.78
   6  10 -12   68.07    9.63
  -6 -10  13  102.79   10.46
  -6 -10  14    7.22    4.28
  -6  -9   1  123.25   10.01
   6   9  -1  119.74    9.14
   6   9  -1  135.79   11.77
  -6  -9   2    5.05    2.20
  -6  -9   2   10.58    4.31
   6   9  -2    7.78    2.15
   6   9  -2    8.74    3.41
  -6  -9   3  247.38   17.75
  -6  -9   3  251.93   20.55
   6   9  -3  283.12   20.54
   6   9  -3  248.52   19.63
  -6  -9   4  463.72   31.09
  -6  -9   4  480.30   36.95
   6   9  -4  507.04   34.78
   6   9  -4  461.52   34.97
  -6  -9   5   92.59    8.44
  -6  -9   5  111.67   10.89
   6   9  -5   99.95    8.77
  -6  -9   6    3.70    2.57
  -6  -9   6    3.33    3.46
   6   9  -6    3.63    2.23
  -6  -9   7  241.10   18.55
  -6  -9   7  223.73   17.98
   6   9  -7  247.18   18.87
  -6  -9   8  212.13   16.50
  -6  -9   8  209.57   17.03
   6   9  -8  248.73   19.70
  -6  -9   9   26.33    4.93
  -6  -9   9   29.16    5.19
   6   9  -9   25.99    4.99
  -6  -9  10   45.97    6.35
   6   9 -10   42.80    6.44
  -6  -9  11  139.49   11.76
   6   9 -11  192.74   17.48
  -6  -9  12   81.31    8.13
   6   9 -12   94.26   10.75
  -6  -9  13    2.22    3.41
   6   9 -13    1.98    4.35
  -6  -9  14   44.00    6.13
  -6  -9  15   23.97    4.98
  -6  -8   1  316.16   21.95
  -6  -8   1  299.27   24.49
   6   8  -1  322.81   22.12
   6   8  -1  300.33   22.73
  -6  -8   2  481.40   32.23
  -6  -8   2  456.87   34.56
   6   8  -2  515.87   34.83
   6   8  -2  488.42   36.82
  -6  -8   3  221.26   15.74
  -6  -8   3  232.59   19.10
   6   8  -3  245.17   17.57
   6   8  -3  237.85   19.02
  -6  -8   4    4.79    2.28
  -6  -8   4   10.93    3.88
   6   8  -4    6.28    2.13
   6   8  -4   10.36    3.09
  -6  -8   5  358.74   24.80
   6   8  -5  387.78   27.29
   6   8  -5  340.07   26.72
  -6  -8   6  360.71   25.37
  -6  -8   6  363.25   28.23
  -6  -8   7   56.98    6.41
  -6  -8   7   60.12    6.82
   6   8  -7   65.54    7.01
  -6  -8   8   15.27    3.63
  -6  -8   8   15.49    3.89
   6   8  -8   13.29    3.31
  -6  -8   9   81.51    8.39
  -6  -8   9   80.43    7.92
   6   8  -9   99.29    9.89
  -6  -8  10  193.99   16.10
  -6  -8  10  170.95   14.20
  -6  -8  11   23.82    4.62
   6   8 -11   30.62    5.63
  -6  -8  12   44.86    5.78
   6   8 -12   57.44    7.88
  -6  -8  13  115.23   10.21
   6   8 -13  145.92   14.44
  -6  -8  14   29.29    5.05
   6   8 -14   35.00    6.91
  -6  -8  16   10.16    4.36
  -6  -7   1  584.22   38.63
   6   7  -1  626.56   42.33
   6   7  -1  506.12   35.36
  -6  -7   2   53.71    5.09
  -6  -7   2   78.50    9.00
   6   7  -2   58.77    5.33
   6   7  -2   72.84    7.14
  -6  -7   3  394.81   27.10
  -6  -7   3  366.42   27.94
   6   7  -3  393.51   26.56
   6   7  -3  375.87   28.41
  -6  -7   4  390.61   29.73
   6   7  -4  413.15   28.09
   6   7  -4  394.84   30.03
  -6  -7   5  265.30   18.56
  -6  -7   5  279.10   22.04
   6   7  -5  285.99   20.22
  -6  -7   6    3.83    2.22
  -6  -7   6    2.82    3.15
   6   7  -6    1.30    1.63
  -6  -7   7  190.74   14.47
  -6  -7   7  196.73   16.06
   6   7  -7  206.13   15.77
  -6  -7   8  257.24   19.46
  -6  -7   8  237.58   18.79
   6   7  -8  248.80   18.55
  -6  -7   9  132.50   12.13
  -6  -7   9  119.10   10.29
   6   7  -9  134.44   11.77
  -6  -7  10    0.06    2.13
  -6  -7  10    1.12    2.92
   6   7 -10    1.84    2.39
  -6  -7  11   99.02    9.78
  -6  -7  12   96.52    8.97
   6   7 -12  117.46   11.81
   6   7 -13   11.49    4.00
  -6  -7  14    7.32    3.45
   6   7 -14    8.11    4.06
  -6  -7  15   61.26    6.92
   6   7 -15   73.86    9.80
  -6  -7  16   26.23    5.05
  -6  -6   1    8.82    1.99
  -6  -6   1    8.51    4.36
   6   6  -1   10.06    1.86
   6   6  -1    8.30    2.31
  -6  -6   2  482.61   31.22
  -6  -6   2  485.98   37.02
   6   6  -2  534.28   35.83
   6   6  -2  488.73   36.10
  -6  -6   3  403.58   26.75
  -6  -6   3  432.55   33.67
   6   6  -3  401.31   26.18
   6   6  -3  410.87   30.95
  -6  -6   4   35.98    4.21
  -6  -6   4   38.17    5.10
   6   6  -4   37.15    4.09
   6   6  -4   30.20    3.85
  -6  -6   5   80.44    7.04
  -6  -6   5   89.39    8.55
   6   6  -5   91.64    7.93
  -6  -6   6  193.78   14.23
  -6  -6   6  201.22   16.15
   6   6  -6  213.96   15.97
  -6  -6   7  211.76   15.87
  -6  -6   7  195.59   15.20
   6   6  -7  230.56   17.40
  -6  -6   8   41.69    5.22
  -6  -6   8   42.20    5.06
   6   6  -8   41.91    5.07
  -6  -6   9  123.18   10.49
   6   6  -9  133.06   11.47
   6   6 -10  195.29   15.51
  -6  -6  11   63.32    7.17
  -6  -6  11   57.37    6.21
   6   6 -11   63.83    7.53
  -6  -6  12    1.75    2.49
  -6  -6  12    1.40    2.94
  -6  -6  13   53.82    6.26
  -6  -6  14   67.86    7.14
   6   6 -14   86.39   10.16
  -6  -6  15   11.11    3.76
   6   6 -15   18.80    5.13
  -6  -6  16   13.05    4.08
   6   6 -16   15.59    5.36
  -6  -5   1  878.28   55.49
  -6  -5   1  908.08   69.03
   6   5  -1  888.07   56.04
   6   5  -1  886.83   64.61
  -6  -5   2   78.80    6.50
  -6  -5   2   85.73    9.00
   6   5  -2   79.28    6.30
  -6  -5   3  152.80   11.50
   6   5  -3  148.07   10.83
   6   5  -3  135.79   10.57
  -6  -5   4  319.65   21.95
   6   5  -4  319.65   21.73
   6   5  -4  296.73   22.47
  -6  -5   5  164.54   12.15
  -6  -5   5  176.65   14.61
  -6  -5   6   20.11    3.58
   6   5  -6   19.71    3.12
  -6  -5   7   12.34    3.09
  -6  -5   7   17.49    3.31
   6   5  -7   20.68    3.32
  -6  -5   8  366.40   25.84
  -6  -5   8  321.81   23.40
   6   5  -8  382.82   27.27
  -6  -5   9  134.51   11.37
  -6  -5   9  116.63    9.70
   6   5  -9  129.09   10.93
  -6  -5  10    1.44    2.34
  -6  -5  10    3.51    2.63
   6   5 -10    2.83    2.43
  -6  -5  11   29.16    4.59
  -6  -5  11   27.63    4.23
  -6  -5  12  138.63   12.18
  -6  -5  12  105.61    9.08
   6   5 -12  130.59   12.17
  -6  -5  13   49.96    6.24
  -6  -5  13   53.96    6.27
   6   5 -13   59.75    7.71
  -6  -5  14    2.80    3.27
   6   5 -14    2.64    2.85
  -6  -5  15   52.79    6.49
   6   5 -15   44.87    8.35
   6   5 -16   60.69    8.57
  -6  -5  17   12.21    4.40
  -6  -4   1   10.01    1.77
  -6  -4   1   14.17    5.59
   6   4  -1   10.99    1.77
   6   4  -1    9.69    1.90
  -6  -4   2  458.60   36.12
   6   4  -2  408.26   25.53
   6   4  -2  453.26   33.99
  -6  -4   3  237.83   19.52
   6   4  -3  214.46   14.63
   6   4  -3  202.41   15.13
  -6  -4   4  218.44   15.07
  -6  -4   4  234.41   18.49
   6   4  -4  230.17   15.95
  -6  -4   5    1.70    1.37
  -6  -4   5    1.85    2.35
   6   4  -5    1.99    1.31
  -6  -4   6  723.31   47.60
  -6  -4   6  688.11   50.04
  -6  -4   7  384.84   26.46
   6   4  -7  374.38   25.31
  -6  -4   8    6.21    2.22
  -6  -4   8    4.24    2.03
   6   4  -8    5.99    2.14
  -6  -4   9   65.14    6.40
  -6  -4   9   67.48    6.42
  -6  -4  10  199.07   15.39
  -6  -4  10  171.36   13.24
   6   4 -10  198.92   15.75
  -6  -4  11  278.24   20.76
  -6  -4  11  234.10   17.61
   6   4 -11  278.02   21.22
  -6  -4  12    1.15    2.00
  -6  -4  12    1.33    2.93
   6   4 -12    1.24    2.35
  -6  -4  13   53.91    6.17
   6   4 -13   57.74    7.34
  -6  -4  14   81.04    7.96
   6   4 -14   90.66   10.07
  -6  -4  15   20.66    4.25
   6   4 -15   18.89    4.90
  -6  -4  16    1.81    3.65
   6   4 -16   -1.03    3.12
   6   4 -17   14.46    4.99
  -6  -3   1  895.39   50.70
  -6  -3   1 1655.39  136.62
  -6  -3   2  308.51   20.58
  -6  -3   2  316.40   25.85
   6   3  -2  299.51   19.43
  -6  -3   3  108.37    8.23
  -6  -3   3  115.01   10.48
   6   3  -3  107.20    7.95
   6   3  -3  106.05    8.43
  -6  -3   4  119.07    9.03
  -6  -3   4  115.03    9.42
   6   3  -4  124.44    9.34
  -6  -3   5  452.65   29.32
  -6  -3   5  472.31   35.04
   6   3  -5  483.85   32.13
  -6  -3   6  197.42   14.25
  -6  -3   6  194.79   15.01
  -6  -3   7  221.75   16.13
  -6  -3   7  199.52   14.98
  -6  -3   8  210.37   15.42
  -6  -3   8  179.98   13.24
   6   3  -8  230.27   17.47
  -6  -3   9  225.26   16.32
   6   3  -9  227.64   16.85
  -6  -3  10   86.00    7.86
  -6  -3  10   76.49    6.80
   6   3 -10   88.14    8.41
  -6  -3  11   59.28    6.42
  -6  -3  11   41.26    4.51
  -6  -3  12  237.29   18.02
  -6  -3  12  197.88   15.08
   6   3 -12  243.96   19.47
  -6  -3  13   76.61    7.54
  -6  -3  13   73.27    7.21
   6   3 -13   84.38    9.13
  -6  -3  14    3.09    2.26
  -6  -3  14    0.73    3.31
   6   3 -14    0.84    2.64
  -6  -3  15   14.34    4.17
   6   3 -15   14.60    4.27
  -6  -3  16   29.95    4.99
   6   3 -16   28.79    6.17
  -6  -3  17   21.27    4.71
   6   3 -17   13.95    5.08
  -6  -2   1  245.67   15.81
   6   2  -1  258.66   16.96
   6   2  -1  270.07   20.12
  -6  -2   2   51.27    4.28
  -6  -2   2   52.31    5.46
   6   2  -2   60.61    5.13
   6   2  -2   48.25    3.88
  -6  -2   3  593.37   38.29
  -6  -2   3  582.94   43.95
  -6  -2   4  429.04   27.89
  -6  -2   4  458.08   34.87
   6   2  -4  424.86   27.33
  -6  -2   5   36.89    3.93
   6   2  -5   33.85    3.57
  -6  -2   6   89.09    7.25
  -6  -2   6   85.50    6.89
   6   2  -6   92.45    7.65
  -6  -2   7  294.19   20.43
  -6  -2   7  275.62   20.25
   6   2  -7  284.81   19.76
  -6  -2   8  154.62   11.98
  -6  -2   8  130.42    9.91
  -6  -2   9    2.17    1.67
  -6  -2   9    1.11    1.98
   6   2  -9    1.39    1.64
  -6  -2  10  148.14   11.62
  -6  -2  10  133.44   10.57
   6   2 -10  152.66   12.48
  -6  -2  11  165.95   13.07
  -6  -2  11  144.64   11.51
   6   2 -11  160.26   13.23
  -6  -2  12   61.34    6.28
  -6  -2  12   54.24    5.63
   6   2 -12   68.47    8.32
  -6  -2  13   -0.43    2.77
   6   2 -13    2.37    2.56
  -6  -2  14   41.34    5.26
  -6  -2  14   32.19    4.53
   6   2 -14   36.15    5.89
  -6  -2  15   60.15    6.79
  -6  -2  15   45.82    5.56
   6   2 -15   55.76    7.73
  -6  -2  16   13.07    4.17
  -6  -2  16   10.62    4.62
   6   2 -16   12.10    4.47
  -6  -2  17    1.78    3.89
  -6  -2  17    1.67    4.57
   6   2 -18   32.03    6.88
  -6  -1   1  291.33   18.42
   6   1  -1  324.63   21.52
   6   1  -1  300.73   21.80
  -6  -1   2  964.09   60.76
   6   1  -2  963.71   60.34
  -6  -1   3  213.43   14.30
   6   1  -3  218.66   14.73
  -6  -1   4   89.73    6.81
   6   1  -4   95.38    7.32
  -6  -1   5  487.21   31.17
   6   1  -5  516.18   33.94
  -6  -1   6   96.19    7.51
  -6  -1   6   92.99    7.14
   6   1  -6  103.66    8.29
  -6  -1   7   44.29    4.48
  -6  -1   7   42.39    3.74
   6   1  -7   38.55    4.11
  -6  -1   8    3.13    1.51
  -6  -1   8    2.15    1.45
   6   1  -8    2.37    1.58
  -6  -1   9  319.68   22.33
  -6  -1   9  279.04   20.02
   6   1  -9  324.34   23.25
  -6  -1  10  184.80   13.98
  -6  -1  10  165.45   12.57
   6   1 -10  181.07   14.18
  -6  -1  11   11.43    2.57
  -6  -1  11    6.30    2.76
  -6  -1  11    5.47    2.36
   6   1 -11    8.65    2.81
  -6  -1  12   51.60    5.53
  -6  -1  12   37.39    5.11
   6   1 -12   56.46    6.81
  -6  -1  13   77.08    7.51
  -6  -1  13   64.14    6.45
  -6  -1  13   54.87    6.47
   6   1 -13   79.15    8.77
  -6  -1  14   78.44    7.69
  -6  -1  14   67.70    6.97
  -6  -1  14   64.68    7.98
   6   1 -14   77.87    8.91
  -6  -1  15    1.97    2.12
  -6  -1  15    4.01    3.67
  -6  -1  15    3.77    4.10
   6   1 -15    6.11    3.42
  -6  -1  16   34.72    5.48
  -6  -1  16   29.86    6.85
  -6  -1  17   61.45    9.54
   6   1 -17   75.08    9.67
   6   1 -17   82.53   10.74
   6   1 -18    8.89    4.28
  -6   0   1  728.46   45.00
   6   0  -1  772.41   49.08
  -6   0   2    1.27    0.73
   6   0  -2    0.76    0.65
  -6   0   3  391.05   25.12
   6   0  -3  397.18   25.62
  -6   0   4  563.44   35.80
   6   0  -4  574.85   36.88
  -6   0   5  166.35   11.66
   6   0  -5  161.96   11.35
  -6   0   6    8.56    1.72
   6   0  -6    6.45    1.66
  -6   0   7  170.61   12.09
   6   0  -7  174.83   12.83
  -6   0   8   57.63    5.33
  -6   0   8   45.44    3.64
  -6   0   8   47.88    5.83
   6   0  -8   56.27    5.64
  -6   0   9    7.62    1.91
  -6   0   9    6.64    1.84
   6   0  -9    5.90    2.22
  -6   0  10  152.46   11.81
  -6   0  10  124.49    9.45
  -6   0  10  129.17   11.82
   6   0 -10  156.30   12.95
  -6   0  11   85.73    7.62
  -6   0  11   73.08    6.51
  -6   0  11   69.53    7.75
   6   0 -11   97.81    9.49
  -6   0  12   59.19    5.91
  -6   0  12   55.29    5.81
  -6   0  12   45.14    6.74
   6   0 -12   61.71    7.17
  -6   0  13    4.11    2.00
  -6   0  13    1.31    4.57
  -6   0  14   14.32    3.97
  -6   0  14   17.09    6.48
   6   0 -14   18.41    4.31
  -6   0  15  142.40   12.13
  -6   0  15  111.65    9.85
   6   0 -15  124.02   12.12
   6   0 -15  142.62   13.45
  -6   0  16   77.88    8.10
  -6   0  16   63.08    7.02
  -6   0  16   66.10   11.60
   6   0 -16   82.38    9.91
   6   0 -16   79.29    9.60
  -6   0  17    1.95    4.08
  -6   0  17    2.53    9.11
   6   0 -17    0.55    2.96
   6   0 -17    0.13    4.02
   6   0 -18   17.17    5.45
   6   0 -18   12.94    5.81
   6   0 -19   32.00    7.13
  -6   1   1  149.75    9.68
   6  -1  -1  154.57   10.10
   6  -1  -2  369.49   23.46
  -6   1   3  152.15   10.13
   6  -1  -3  156.06   10.59
  -6   1   4   12.41    1.60
   6  -1  -4   13.87    1.87
  -6   1   5   33.47    3.12
   6  -1  -5   29.06    3.00
  -6   1   6  577.43   37.83
   6  -1  -6  536.58   34.13
   6  -1  -7  198.92   14.22
  -6   1   8  136.29   10.11
   6  -1  -8  125.19    9.70
  -6   1   9  183.75   13.50
  -6   1   9  149.73   10.70
  -6   1   9  164.23   15.42
   6  -1  -9  192.67   15.04
  -6   1  10   86.34    7.33
  -6   1  10   71.04    5.84
  -6   1  11   63.62    5.90
  -6   1  11   56.81    5.36
  -6   1  11   58.46   12.35
  -6   1  12    3.71    1.82
  -6   1  12    2.65    2.61
  -6   1  12    6.39   12.47
   6  -1 -12    2.24    2.49
   6  -1 -12    5.05    2.65
  -6   1  13  142.95   11.34
  -6   1  13  126.13   10.37
   6  -1 -13  152.81   13.52
   6  -1 -13  143.88   12.11
  -6   1  14  125.74   10.23
  -6   1  14  138.85   21.87
   6  -1 -14  151.67   13.96
   6  -1 -14  133.73   11.48
  -6   1  15    6.00    2.70
  -6   1  15    7.84    3.70
  -6   1  15    3.39   15.72
   6  -1 -15    5.67    3.27
   6  -1 -15    9.99    3.88
  -6   1  16   29.86    4.95
  -6   1  16   20.40    4.21
   6  -1 -16   25.94    5.70
   6  -1 -16   29.15    5.81
  -6   1  17   21.93    5.17
  -6   1  17   39.50   23.20
   6  -1 -17   20.37    5.38
   6  -1 -18   28.33    6.52
   6  -1 -18   32.12    7.01
   6  -1 -19    1.39    4.37
  -6   2   1  311.52   20.04
   6  -2  -1  280.44   16.91
   6  -2  -1  295.23   18.44
   6  -2  -1  311.83   23.18
  -6   2   2  221.06   14.44
   6  -2  -2  205.86   13.02
   6  -2  -2  207.34   13.26
   6  -2  -3    2.66    0.84
  -6   2   4  225.09   14.81
   6  -2  -4  218.60   14.41
   6  -2  -4  220.26   14.95
  -6   2   5  665.96   42.43
   6  -2  -5  667.11   42.76
   6  -2  -5  645.22   42.31
  -6   2   6   12.41    1.74
   6  -2  -6   12.91    1.87
  -6   2   7   17.92    2.20
   6  -2  -7   17.68    2.65
   6  -2  -7   17.82    2.37
  -6   2   8  428.64   28.04
   6  -2  -8  444.55   30.15
   6  -2  -8  416.56   27.45
  -6   2   9  169.37   12.36
  -6   2   9  150.16   11.11
  -6   2   9  144.54   10.46
   6  -2  -9  175.78   13.75
   6  -2  -9  174.09   12.95
  -6   2  10    5.19    1.78
  -6   2  10    5.64    1.68
  -6   2  10    6.40    2.95
   6  -2 -10    6.95    2.41
   6  -2 -10    7.26    2.25
  -6   2  11  126.14    9.96
   6  -2 -11  116.67   10.13
   6  -2 -11  121.53    9.71
  -6   2  12  173.74   13.22
  -6   2  12  131.20    9.42
  -6   2  12  180.27   18.73
   6  -2 -12  183.71   15.29
   6  -2 -12  204.50   16.26
  -6   2  13   92.27    8.40
  -6   2  13   71.10    6.24
  -6   2  13   83.12   16.75
   6  -2 -13   91.34    9.42
   6  -2 -13   96.96    8.94
  -6   2  14   25.99    4.27
  -6   2  14   23.78    3.97
  -6   2  14   18.78   15.22
   6  -2 -14   22.08    4.31
  -6   2  15   88.13    8.03
  -6   2  15   89.96   21.15
   6  -2 -15  115.76   12.10
  -6   2  16   49.48    6.60
  -6   2  16   38.03    4.97
   6  -2 -16   44.51    7.01
   6  -2 -16   55.35    7.49
  -6   2  17   19.17    4.59
  -6   2  17   -0.97   17.86
   6  -2 -17   18.56    5.15
   6  -2 -17   24.61    5.76
   6  -2 -18    1.93    3.75
   6  -2 -18   -0.28    3.93
   6  -3  -1   11.12    1.82
  -6   3   2   73.19    4.77
   6  -3  -2   77.77    5.10
   6  -3  -2   76.49    4.83
   6  -3  -2   86.95    7.78
  -6   3   3  456.65   28.46
   6  -3  -3  478.76   30.49
   6  -3  -3  473.47   29.67
   6  -3  -3  481.81   36.87
  -6   3   4  535.54   33.94
   6  -3  -4  548.37   35.20
   6  -3  -4  528.09   32.88
  -6   3   5   82.53    6.19
   6  -3  -5   78.95    6.04
   6  -3  -5   76.39    5.26
  -6   3   6  308.44   20.28
   6  -3  -6  310.00   20.78
   6  -3  -6  302.19   19.38
  -6   3   7  260.52   17.39
  -6   3   7  229.53   16.05
   6  -3  -7  285.69   20.26
   6  -3  -7  273.69   18.45
  -6   3   8  114.42    8.42
  -6   3   8  109.16    7.91
   6  -3  -8  131.99   10.58
   6  -3  -8  132.93    9.87
  -6   3   9   22.66    2.98
  -6   3   9   18.99    2.03
   6  -3  -9   17.63    3.05
   6  -3  -9   17.52    2.48
  -6   3  10  226.43   15.57
  -6   3  10  212.07   15.19
   6  -3 -10  261.51   19.76
   6  -3 -10  262.74   18.76
  -6   3  11   60.47    5.52
  -6   3  11   64.72    6.06
   6  -3 -11   89.49    9.68
   6  -3 -11   79.79    7.10
  -6   3  12   -0.39    1.67
  -6   3  12    1.94    3.25
   6  -3 -12    2.56    2.41
  -6   3  13   88.72    8.17
   6  -3 -13   88.88    9.11
   6  -3 -13   88.55    7.77
  -6   3  14  115.58   10.34
  -6   3  14   99.47   10.93
   6  -3 -14  108.54   10.88
   6  -3 -14  120.70   10.26
  -6   3  15   41.62    6.04
  -6   3  15   30.03    8.09
   6  -3 -15   40.94    6.63
   6  -3 -15   37.15    5.39
  -6   3  16    2.88    2.94
  -6   3  16    0.90    2.81
  -6   3  16   -2.87    7.83
   6  -3 -16    2.37    3.21
   6  -3 -16   -1.27    3.16
  -6   3  17   56.45    8.11
  -6   3  17   39.48    5.34
   6  -3 -17   59.00    8.70
   6  -3 -17   50.59    7.11
   6  -3 -18  116.84   12.98
   6  -3 -18  149.30   14.05
   6  -3 -19   17.24    5.93
   6  -3 -19   25.93    6.35
   6  -3 -20   11.49    5.31
   6  -4  -1  217.73   16.50
   6  -4  -2  446.44   33.14
   6  -4  -3  157.56   10.22
   6  -4  -3  148.29    9.03
   6  -4  -3  190.43   18.21
  -6   4   4  299.93   21.07
   6  -4  -4  263.62   17.09
   6  -4  -4  236.49   18.30
  -6   4   5  369.88   24.28
  -6   4   5  356.51   26.06
   6  -4  -5  407.44   27.49
   6  -4  -5  387.78   24.96
   6  -4  -5  342.32   24.81
  -6   4   6  224.47   14.89
  -6   4   6  227.04   16.69
   6  -4  -6  262.28   18.48
   6  -4  -6  242.43   15.76
  -6   4   7   23.45    2.97
  -6   4   7   24.05    2.89
   6  -4  -7   25.01    2.38
  -6   4   8  191.34   13.89
  -6   4   8  161.67   11.44
   6  -4  -8  204.99   15.34
   6  -4  -8  196.89   13.47
  -6   4   9  270.42   18.77
  -6   4   9  245.57   17.39
   6  -4  -9  303.64   22.22
   6  -4  -9  283.75   19.04
  -6   4  10   80.90    7.06
   6  -4 -10   93.18    8.67
   6  -4 -10   90.46    6.98
  -6   4  11   61.60    6.10
   6  -4 -11   64.62    5.58
  -6   4  12  219.11   16.84
  -6   4  12  173.23   12.38
   6  -4 -12  224.80   18.11
   6  -4 -12  236.19   17.26
  -6   4  13   76.28    7.80
  -6   4  13   67.65    6.37
   6  -4 -13   86.06    9.33
   6  -4 -13   85.60    7.52
  -6   4  14   -1.53    2.26
  -6   4  14    0.66    3.20
   6  -4 -14    0.91    2.75
   6  -4 -14    1.31    2.14
  -6   4  15   14.28    4.68
   6  -4 -15   16.67    4.80
   6  -4 -15   17.78    3.73
  -6   4  16  120.40   12.73
  -6   4  16   71.82    7.74
   6  -4 -16  105.23   11.78
   6  -4 -16  117.25   10.67
  -6   4  17   76.89   10.08
  -6   4  17   51.36    5.77
   6  -4 -17   69.75    8.19
   6  -4 -18    5.60    4.39
   6  -4 -18   -0.41    3.54
   6  -4 -19   52.47    7.86
   6  -4 -20   16.89    6.45
   6  -5  -1  299.06   22.60
   6  -5  -2    3.54    2.37
   6  -5  -3  562.20   34.94
   6  -5  -3  575.23   36.07
   6  -5  -3  595.48   46.23
  -6   5   4  283.62   21.02
   6  -5  -4  319.19   21.16
   6  -5  -4  300.97   19.08
  -6   5   5   40.62    3.68
  -6   5   5   39.02    4.05
   6  -5  -5   39.90    3.54
   6  -5  -5   38.10    2.84
   6  -5  -5   38.87    6.27
  -6   5   6   50.78    4.94
  -6   5   6   43.65    4.35
   6  -5  -6   49.85    4.58
   6  -5  -6   48.72    3.62
   6  -5  -6   45.09    4.79
  -6   5   7  287.72   19.81
  -6   5   7  283.09   20.87
   6  -5  -7  321.17   22.47
   6  -5  -7  299.48   19.20
  -6   5   8  283.41   20.33
  -6   5   8  246.29   17.58
   6  -5  -8  288.87   20.44
   6  -5  -8  292.78   19.46
  -6   5   9    2.85    2.02
   6  -5  -9    1.97    1.79
  -6   5  10  101.86    8.98
   6  -5 -10  109.97    9.77
   6  -5 -10  109.95    8.06
  -6   5  11  237.65   18.01
  -6   5  11  211.08   15.51
   6  -5 -11  249.83   19.30
   6  -5 -11  241.27   16.57
  -6   5  12   24.36    4.46
  -6   5  12   24.93    3.37
   6  -5 -12   27.40    4.75
   6  -5 -12   31.43    3.72
  -6   5  13   25.34    4.82
  -6   5  13   27.01    3.94
   6  -5 -13   20.60    4.68
   6  -5 -13   23.38    3.38
  -6   5  14   96.77   10.16
  -6   5  14   84.47    7.71
   6  -5 -14  104.17   11.17
   6  -5 -14   98.43    8.21
  -6   5  15  103.85   11.60
  -6   5  15   69.95    6.72
  -6   5  16    4.73    4.32
  -6   5  16    8.12    4.02
   6  -5 -16    8.21    4.31
   6  -5 -16    5.04    3.37
  -6   5  17   55.31    8.93
   6  -5 -17   43.82    8.27
   6  -5 -17   50.14    6.66
   6  -5 -18   69.41   10.73
   6  -5 -19    8.35    5.34
   6  -5 -19   13.76    5.21
   6  -5 -20    1.10    5.17
   6  -6  -1  368.10   27.77
  -6   6   3   75.18    6.80
   6  -6  -3   80.95    9.75
  -6   6   4   48.22    5.08
   6  -6  -4   48.23    3.76
   6  -6  -4   45.95    3.48
   6  -6  -4   57.29   13.01
  -6   6   5  119.91    9.97
  -6   6   6  193.52   14.33
   6  -6  -6  231.67   16.25
   6  -6  -6  223.30   14.70
   6  -6  -6  240.19   21.17
  -6   6   7  110.09    8.55
  -6   6   7  115.18    9.82
   6  -6  -7  114.68    9.03
   6  -6  -7  114.54    8.02
   6  -6  -7   95.95    8.58
  -6   6   8   74.72    7.22
  -6   6   8   56.83    5.37
   6  -6  -8   74.40    6.93
   6  -6  -8   71.28    5.37
  -6   6   9  351.71   25.20
   6  -6  -9  445.64   32.00
  -6   6  10   72.79    8.25
  -6   6  10   55.90    5.03
   6  -6 -10   80.89    8.11
   6  -6 -10   77.20    6.10
  -6   6  11    0.23    2.57
  -6   6  11    0.67    2.43
   6  -6 -11    2.27    2.36
   6  -6 -11    0.19    1.50
  -6   6  12   33.36    4.17
   6  -6 -12   36.78    5.65
   6  -6 -12   35.84    3.78
  -6   6  13   92.77    7.86
   6  -6 -13  122.43   12.17
  -6   6  14   98.07   11.46
  -6   6  14   70.89    6.37
   6  -6 -14   96.65   10.73
   6  -6 -14  106.08    9.02
  -6   6  15   13.74    5.49
  -6   6  15   10.44    3.31
   6  -6 -15    9.44    4.58
   6  -6 -15   11.72    3.14
  -6   6  16  157.81   17.76
  -6   6  16  101.75    8.55
   6  -6 -16  139.57   14.50
   6  -6 -16  146.31   12.35
  -6   6  17   81.58   12.18
   6  -6 -17   72.75   10.39
   6  -6 -17   83.06    8.48
   6  -6 -18    5.71    4.82
   6  -6 -19   10.92    5.41
   6  -6 -19   17.31    5.66
   6  -7  -1  388.69   29.47
   6  -7  -2    1.41    3.29
  -6   7   3  164.50   13.63
   6  -7  -3  152.86    9.58
   6  -7  -3  187.20   17.34
  -6   7   4  245.37   18.93
   6  -7  -4  257.82   16.75
   6  -7  -4  261.67   17.04
   6  -7  -4  279.95   26.99
  -6   7   5  217.47   17.21
   6  -7  -5  229.51   15.67
   6  -7  -5  212.12   13.86
  -6   7   6    3.49    3.13
   6  -7  -6    3.61    1.49
   6  -7  -6    3.75    1.50
   6  -7  -6   -0.55    7.78
  -6   7   7  386.88   29.22
   6  -7  -7  424.70   29.18
   6  -7  -7  394.54   25.60
   6  -7  -7  366.35   28.85
  -6   7   8  248.21   18.49
   6  -7  -8  293.32   21.05
   6  -7  -8  284.69   19.16
  -6   7   9    4.53    2.36
  -6   7   9    2.00    3.09
   6  -7  -9    6.79    2.68
   6  -7  -9    5.66    1.89
  -6   7  10  142.90   12.91
  -6   7  10  112.47    9.44
   6  -7 -10  125.76   10.80
   6  -7 -10  124.92    9.04
  -6   7  11  144.26   13.66
  -6   7  11  102.28    8.26
   6  -7 -11  138.31   12.38
   6  -7 -11  134.70   10.01
  -6   7  12  154.04   15.31
  -6   7  12  105.20    8.54
   6  -7 -12  151.63   14.12
   6  -7 -12  135.51   10.25
  -6   7  13   20.36    3.84
   6  -7 -13   24.50    5.03
  -6   7  14  132.95   15.32
  -6   7  14   97.66    8.55
   6  -7 -14  117.54   12.36
   6  -7 -14  111.15    8.99
  -6   7  15  215.98   22.51
  -6   7  15  128.24   10.13
   6  -7 -15  189.54   14.84
   6  -7 -16   11.06    4.88
  -6   7  17   18.44    8.27
   6  -7 -17   13.06    5.68
   6  -7 -17   13.48    4.28
   6  -7 -18   50.98    9.44
   6  -7 -18   45.41    7.24
   6  -7 -19   57.19   10.37
   6  -7 -19   58.79    8.24
   6  -8  -1   14.09    1.47
   6  -8  -1   17.40    4.02
  -6   8   2  141.74   12.15
   6  -8  -2  135.93    8.60
   6  -8  -2  192.70   17.44
  -6   8   3  174.46   14.51
   6  -8  -3  178.88   11.89
   6  -8  -3  167.55   10.86
   6  -8  -3  185.81   17.21
  -6   8   4   51.28    6.00
   6  -8  -4   45.77    3.76
   6  -8  -4   42.71    3.62
   6  -8  -5  230.68   15.96
   6  -8  -5  204.29   13.49
   6  -8  -5  213.83   26.15
   6  -8  -6  542.98   35.13
   6  -8  -6  511.67   31.84
   6  -8  -6  643.29   59.53
   6  -8  -7  102.44    8.09
   6  -8  -7   96.23    7.30
   6  -8  -7  154.45   17.62
   6  -8  -8   55.16    5.76
   6  -8  -8   45.99    4.64
   6  -8  -8   52.81    7.69
  -6   8   9   88.31    8.79
   6  -8  -9  107.58    9.72
   6  -8  -9   92.62    7.57
   6  -8  -9   85.79    8.94
   6  -8 -10  133.53   11.64
   6  -8 -10  117.32    8.97
  -6   8  11   89.80    9.33
   6  -8 -11   77.79    8.14
   6  -8 -11   77.49    6.76
  -6   8  12   45.06    7.07
   6  -8 -12   43.35    6.61
   6  -8 -12   38.30    4.63
   6  -8 -13  183.79   16.19
  -6   8  14   20.24    6.68
  -6   8  14   13.97    3.74
   6  -8 -14   28.33    5.89
   6  -8 -14   18.88    3.93
  -6   8  15    5.53    6.52
  -6   8  15    2.05    3.28
   6  -8 -15    3.38    3.05
   6  -8 -16   33.71    7.13
  -6   8  17   85.01   14.71
   6  -8 -17   75.42   10.87
   6  -8 -17   70.06    8.23
   6  -8 -18   28.51    7.99
   6  -8 -18   24.87    5.93
  -6   9   1  161.69   10.85
   6  -9  -1  158.82   10.63
   6  -9  -1  156.62   10.69
   6  -9  -2   33.12    2.81
   6  -9  -2   32.51    3.08
   6  -9  -2   27.89    5.97
  -6   9   3   37.63    5.25
   6  -9  -3   35.60    3.02
   6  -9  -3   34.55    3.23
   6  -9  -3   46.10    8.36
  -6   9   4  315.41   24.75
   6  -9  -4  324.92   21.30
   6  -9  -4  328.80   30.03
   6  -9  -5  214.61   14.43
   6  -9  -5  221.83   15.44
   6  -9  -5  231.40   29.07
   6  -9  -6    4.48    1.89
   6  -9  -6    4.58    2.23
  -6   9   7  100.09    9.48
   6  -9  -7  111.77    9.05
   6  -9  -7  101.00    8.34
   6  -9  -7  125.15   17.73
  -6   9   8  195.48   16.76
   6  -9  -8  190.69   14.32
   6  -9  -8  170.75   12.45
   6  -9  -8  188.22   18.85
  -6   9   9   51.40    6.60
   6  -9  -9   53.65    6.04
   6  -9  -9   49.61    5.67
   6  -9  -9   51.68    7.82
  -6   9  10    1.21    3.78
   6  -9 -10    0.37    2.29
   6  -9 -10    1.50    2.81
   6  -9 -10   -0.45    3.03
  -6   9  11  134.02   11.45
   6  -9 -11  159.87   13.80
   6  -9 -11  164.44   13.26
  -6   9  12  171.03   13.58
   6  -9 -12  234.33   19.95
   6  -9 -12  213.92   16.27
  -6   9  13    2.11    3.85
   6  -9 -13    0.47    3.11
  -6   9  14   58.26    9.23
  -6   9  14   29.19    5.04
   6  -9 -14   39.25    7.00
   6  -9 -14   36.83    5.88
  -6   9  15   76.22   11.00
   6  -9 -15   47.75    6.76
   6  -9 -16   41.98    8.12
  -6   9  17    2.46    6.56
   6  -9 -17    6.58    5.58
   6  -9 -17    6.86    4.70
  -6  10   1    1.11    1.24
   6 -10  -1    0.49    3.78
  -6  10   2  156.11   10.49
  -6  10   2  174.73   15.59
   6 -10  -2  164.37   11.16
   6 -10  -2  162.80   11.68
   6 -10  -2  188.84   17.36
  -6  10   3  285.83   20.18
  -6  10   3  299.98   24.63
   6 -10  -3  278.95   17.95
   6 -10  -3  278.44   18.41
   6 -10  -3  334.38   29.29
  -6  10   4   72.04    8.03
   6 -10  -4   61.94    4.97
   6 -10  -4   60.25    5.38
  -6  10   5   43.43    6.07
   6 -10  -5   44.35    4.23
   6 -10  -5   37.99    4.25
   6 -10  -5   45.21   17.70
  -6  10   6  253.11   20.76
   6 -10  -6  250.39   17.06
   6 -10  -6  268.68   19.35
  -6  10   7  158.48   13.96
   6 -10  -7  170.14   12.85
   6 -10  -7  160.87   12.51
  -6  10   8   15.99    4.61
   6 -10  -8   14.08    3.17
   6 -10  -8   11.04    3.48
  -6  10   9   75.42    8.39
   6 -10  -9   84.51    8.23
  -6  10  10  267.53   21.52
   6 -10 -10  299.63   22.64
   6 -10 -10  270.96   20.07
  -6  10  11   46.36    6.34
   6 -10 -11   71.46    8.47
   6 -10 -11   62.12    7.77
  -6  10  12   12.56    4.88
   6 -10 -12   11.17    4.17
   6 -10 -12   13.53    5.03
  -6  10  13   76.80    8.29
   6 -10 -13  103.02   11.48
  -6  10  14   61.82    7.03
   6 -10 -14  104.19   12.33
   6 -10 -14   90.46   10.34
   6 -10 -15   21.55    6.15
   6 -10 -16   10.25    6.21
  -6  11   1  234.27   14.92
   6 -11  -1  254.75   17.71
   6 -11  -1  251.64   17.76
   6 -11  -1  300.72   25.57
  -6  11   2  123.26    8.12
  -6  11   2  162.16   15.18
   6 -11  -2  155.67   11.35
   6 -11  -2  148.59   11.37
   6 -11  -2  178.20   17.34
  -6  11   3    0.54    0.81
  -6  11   3    3.97    3.51
   6 -11  -3    3.72    1.65
   6 -11  -3    1.29    1.87
   6 -11  -3    1.12    6.17
  -6  11   4  170.55   14.88
   6 -11  -4  172.62   12.01
   6 -11  -4  176.38   13.28
   6 -11  -5  175.35   12.24
   6 -11  -5  178.01   13.40
   6 -11  -5  220.59   33.92
   6 -11  -6    9.99    2.47
   6 -11  -6    8.54    3.09
   6 -11  -7   41.61    5.74
   6 -11  -7   47.97   21.06
   6 -11  -8  145.26   11.82
   6 -11  -8  132.74   11.83
   6 -11  -8  143.95   19.52
   6 -11  -9  155.28   12.69
   6 -11  -9  151.86   16.84
   6 -11 -10    4.88    3.12
   6 -11 -10    6.61    4.68
   6 -11 -10    9.06    5.47
   6 -11 -11   83.84    9.30
   6 -11 -11   73.38    9.09
   6 -11 -11   76.40    9.74
   6 -11 -12   68.25    8.82
   6 -11 -12   56.76    8.62
   6 -11 -13   12.68    5.11
   6 -11 -14    0.50    4.39
   6 -11 -14    6.13    5.11
  -6  12   1    8.28    1.97
   6 -12  -1   10.80    3.02
   6 -12  -1    9.86    3.25
   6 -12  -1   11.49    5.11
   6 -12  -2   92.77    7.70
   6 -12  -2   88.80    8.19
   6 -12  -2  110.13   13.25
  -6  12   3  205.18   18.30
   6 -12  -3  208.93   15.07
   6 -12  -3  185.45   13.80
   6 -12  -4   37.88    4.10
   6 -12  -4   35.67    4.94
   6 -12  -4   41.36   12.38
  -6  12   5    7.54    4.36
   6 -12  -5    7.03    2.28
   6 -12  -5    5.64    3.08
   6 -12  -5    4.03   19.26
  -6  12   6   97.37   10.07
   6 -12  -6  103.53    8.83
   6 -12  -6   98.08    9.45
  -6  12   7  145.17   13.37
   6 -12  -7  148.83   11.75
   6 -12  -7  141.35   12.57
   6 -12  -7  215.26   37.61
  -6  12   8   21.64    5.54
   6 -12  -8   21.36    4.07
   6 -12  -8   20.63    5.25
   6 -12  -8   30.52   13.95
  -6  12   9   30.15    6.18
   6 -12  -9   32.56    5.38
   6 -12  -9   23.40    6.16
   6 -12  -9   40.74   11.41
  -6  12  10   59.33    7.85
   6 -12 -10   70.08    8.18
   6 -12 -10   70.74   10.19
   6 -12 -10   75.63   11.26
  -6  12  11   26.84    6.39
   6 -12 -11   35.67    6.33
   6 -12 -11   30.93    7.50
   6 -12 -11   31.94    7.02
  -6  12  12    0.95    5.23
   6 -12 -12   -1.12    4.06
   6 -12 -12   -1.47    5.08
   6 -13  -1  120.38   10.98
   6 -13  -1  108.43    9.94
   6 -13  -1  157.81   16.08
   6 -13  -2   68.71    7.77
   6 -13  -2   78.86   11.13
  -6  13   3   -0.17    0.75
  -6  13   3    3.64    3.45
   6 -13  -3   -0.16    2.52
   6 -13  -3    3.66    3.14
   6 -13  -3   -0.50    7.39
  -6  13   4    1.16    1.05
   6 -13  -4   31.44    4.59
   6 -13  -4   24.16    5.01
   6 -13  -5   99.70   10.01
   6 -13  -5  115.15   26.22
  -6  13   6   82.63    9.60
   6 -13  -6   70.65    8.54
  -6  13   7    1.31    4.11
   6 -13  -7   -0.46    3.01
   6 -13  -7    2.73    3.94
   6 -13  -7    5.92   20.05
  -6  13   8  111.41   11.44
   6 -13  -8  115.57   10.80
   6 -13  -8   92.77   10.73
   6 -13  -8  124.78   22.20
  -6  13   9   91.36   10.27
   6 -13  -9   89.42    9.59
   6 -13  -9   72.52   10.20
   6 -13  -9   97.66   16.85
  -6  13  10    3.17    4.87
   6 -13 -10    1.86    4.24
   6 -13 -10    9.59    5.57
   6 -13 -10    7.96    6.96
  -6  13  11    6.74    5.12
   6 -13 -11    4.75    5.60
   6 -13 -12   33.52    7.31
  -6  14   1    0.80    1.03
   6 -14  -1    3.44    4.44
   6 -14  -1    1.62    3.52
   6 -14  -1    4.08    6.03
   6 -14  -2   40.78    6.44
   6 -14  -2   27.55    5.99
   6 -14  -2   49.68   11.06
   6 -14  -3  101.88    9.96
   6 -14  -3   88.84   10.16
  -6  14   4   91.73   10.04
   6 -14  -4   87.44    9.14
   6 -14  -4   74.28    9.49
   6 -14  -4   80.70   18.47
  -6  14   5    4.16    3.78
   6 -14  -5    3.14    3.62
   6 -14  -5    7.38    4.87
   6 -14  -5    5.27   18.17
  -6  14   6   60.70    7.76
   6 -14  -6   43.65    6.55
   6 -14  -6   39.49    7.98
  -6  14   7   88.80    9.69
   6 -14  -7   88.51   25.94
  -6  14   8   10.55    4.54
   6 -14  -8   11.98   14.09
  -6  14   9    3.50    4.32
   6 -14  -9   12.16   10.16
  -6  14  10   38.27    6.44
   6 -14 -10   39.57    9.37
   6 -14 -11   45.08    9.68
   6 -15  -1   36.99    8.83
   6 -15  -2   54.39   10.78
   6 -15  -3   16.52    9.94
   6 -15  -4   18.86   13.55
   6 -15  -5   89.11   21.55
   6 -15  -7  -10.08   13.21
   6 -15  -8   27.35   12.64
   6 -15  -9   43.78   11.59
   6 -16  -1   21.33    7.32
   6 -16  -2   -0.24    7.09
   6 -16  -3   20.38    9.21
   6 -16  -5   12.03   10.17
   6 -16  -6    4.38   11.71
  -5 -17   1  105.50   13.22
   5  17  -1  139.38   12.97
  -5 -16   1    2.69    4.41
  -5 -16   1    3.93    6.22
   5  16  -1    4.34    3.93
   5  16  -1    4.77    3.46
  -5 -16   2   61.34    9.79
   5  16  -2   64.51    8.04
   5  16  -2   41.04    5.63
  -5 -16   3   81.05   10.06
   5  16  -3   92.78    9.90
  -5 -16   4   15.17    5.41
   5  16  -4   14.46    4.34
  -5 -15   1  262.88   22.33
  -5 -15   1  225.44   20.13
   5  15  -1  270.06   21.27
   5  15  -1  201.31   16.17
  -5 -15   2   52.88    8.05
  -5 -15   2   45.57    7.95
   5  15  -2   59.54    7.47
   5  15  -2   50.08    6.44
  -5 -15   3    3.26    3.40
  -5 -15   3    3.03    5.26
   5  15  -3    3.17    3.23
   5  15  -3    2.43    3.03
  -5 -15   4   49.72    7.82
   5  15  -4   66.08    8.29
   5  15  -4   48.44    6.02
  -5 -15   5  131.48   12.67
   5  15  -5  135.93   13.07
  -5 -15   6   21.19    4.96
   5  15  -6   22.61    5.52
  -5 -15   7   13.56    4.43
  -5 -14   1   21.56    5.08
  -5 -14   1   26.55    7.00
  -5 -14   2   49.97    7.21
   5  14  -2   63.07    7.19
   5  14  -2   47.07    5.75
  -5 -14   3  107.18   10.87
   5  14  -3  124.22   11.49
   5  14  -3  101.74    9.65
  -5 -14   4  153.02   14.27
  -5 -14   4  137.31   12.46
   5  14  -4  166.56   14.54
  -5 -14   5    9.54    4.35
  -5 -14   5    7.98    3.89
   5  14  -5    8.17    3.63
  -5 -14   6   70.06    9.17
  -5 -14   6   62.25    7.45
   5  14  -6   76.56    9.39
   5  14  -7  104.08   11.30
  -5 -14   8   22.29    4.97
   5  14  -8   21.27    5.99
  -5 -14   9    2.69    3.84
  -5 -13   1  139.87   12.85
  -5 -13   1  111.61   11.34
   5  13  -1  128.73   10.58
  -5 -13   2  391.30   29.58
  -5 -13   2  321.41   25.32
   5  13  -2  350.01   24.57
   5  13  -2  337.89   26.62
  -5 -13   3   62.99    7.41
  -5 -13   3   77.47    8.87
   5  13  -3   63.97    6.80
   5  13  -3   76.43    8.30
  -5 -13   4   51.76    7.00
  -5 -13   4   44.16    6.18
   5  13  -4   51.98    6.37
   5  13  -4   49.71    6.26
   5  13  -5  166.58   14.46
   5  13  -5  129.98   11.89
  -5 -13   6   66.39    8.33
  -5 -13   6   60.45    7.24
   5  13  -6   66.44    8.08
  -5 -13   7    7.99    3.95
  -5 -13   7   10.65    4.00
   5  13  -7    4.31    3.59
  -5 -13   8    8.17    3.84
   5  13  -8   10.97    4.63
  -5 -13   9   70.31    7.92
   5  13  -9   77.99    9.93
  -5 -13  10   47.66    6.48
  -5 -13  11    0.79    3.75
  -5 -12   1  192.19   15.25
   5  12  -1  183.85   13.47
   5  12  -1  204.53   17.33
  -5 -12   2    2.44    3.61
   5  12  -2    1.27    1.80
   5  12  -2    0.82    3.39
  -5 -12   3  262.77   20.09
  -5 -12   3  241.57   19.58
   5  12  -3  274.23   20.20
   5  12  -3  256.18   20.84
  -5 -12   4  267.01   20.04
  -5 -12   4  261.13   20.86
   5  12  -4  295.76   22.00
  -5 -12   5   15.04    4.09
  -5 -12   5   20.58    4.59
   5  12  -5   13.69    3.56
   5  12  -5   19.10    4.04
  -5 -12   6   22.29    4.74
  -5 -12   6   24.23    4.86
   5  12  -6   23.78    4.48
  -5 -12   7   74.56    8.61
  -5 -12   7   73.30    8.07
   5  12  -7   81.97    8.98
  -5 -12   8   97.40   10.16
  -5 -12   8  102.56    9.94
   5  12  -8  121.30   12.16
  -5 -12   9    2.96    3.68
  -5 -12   9    8.68    4.08
   5  12  -9    9.47    4.02
  -5 -12  10   41.17    5.71
   5  12 -10   45.57    7.58
  -5 -12  11   47.77    6.48
  -5 -12  12    3.54    4.00
  -5 -12  13    4.85    4.28
  -5 -11   1  179.85   14.35
  -5 -11   1  158.44   14.33
   5  11  -1  175.04   13.13
   5  11  -1  162.03   13.58
  -5 -11   2  360.98   26.14
  -5 -11   2  331.95   26.37
   5  11  -2  330.86   25.61
  -5 -11   3   88.92    8.54
  -5 -11   3   90.46    9.20
   5  11  -3   97.89    8.68
   5  11  -3   88.52    8.47
  -5 -11   4   -0.86    3.64
   5  11  -4   -0.35    1.85
  -5 -11   5  116.00   10.65
  -5 -11   5  124.31   11.59
   5  11  -5  125.48   10.75
   5  11  -5  118.70   11.07
  -5 -11   6  105.01   10.12
  -5 -11   6  104.89    9.87
   5  11  -6  114.83   10.43
  -5 -11   7   49.73    6.73
  -5 -11   7   64.34    7.47
  -5 -11   8    4.27    3.82
   5  11  -8    6.18    3.16
  -5 -11   9  139.51   12.11
   5  11  -9  174.30   15.71
  -5 -11  10   77.17    8.24
  -5 -11  11   -0.48    3.12
   5  11 -11   -1.03    3.09
  -5 -11  12    2.74    3.27
   5  11 -12    6.01    4.64
  -5 -11  14   16.80    4.41
  -5 -10   1  262.60   21.58
   5  10  -1  267.02   18.34
   5  10  -1  283.69   22.89
  -5 -10   2    3.92    3.22
   5  10  -2    1.58    1.63
  -5 -10   3  161.11   14.09
   5  10  -3  164.68   12.54
   5  10  -3  159.50   13.52
  -5 -10   4  177.78   15.34
   5  10  -4  168.95   14.22
   5  10  -5  154.51   12.21
  -5 -10   6   -1.31    3.23
   5  10  -6    0.25    1.76
   5  10  -7  146.88   12.36
  -5 -10   8  200.35   16.19
   5  10  -8  225.96   18.00
  -5 -10   9   15.46    3.79
   5  10  -9   13.65    3.81
  -5 -10  10    7.14    3.35
   5  10 -10   12.42    4.03
  -5 -10  11   38.10    5.18
   5  10 -11   42.31    7.03
  -5 -10  12   31.35    4.98
   5  10 -12   40.53    7.10
  -5 -10  13    4.16    3.35
   5  10 -13    5.59    4.53
  -5 -10  14   18.11    4.12
  -5 -10  15   37.58    5.54
   5   9  -1  281.08   19.47
   5   9  -1  262.70   20.19
  -5  -9   2  407.22   31.12
   5   9  -2  455.78   31.25
   5   9  -2  404.65   30.33
  -5  -9   3  423.36   32.62
   5   9  -3  430.94   28.95
   5   9  -3  416.21   31.69
  -5  -9   4   14.34    3.88
   5   9  -4    7.29    2.13
   5   9  -4   13.44    3.33
  -5  -9   5  110.69   10.11
   5   9  -5  114.55    9.55
  -5  -9   6  348.99   26.90
   5   9  -6  354.15   24.75
  -5  -9   7  129.25   10.99
   5   9  -7  146.35   12.30
  -5  -9   8    6.20    3.15
   5   9  -8    7.62    2.95
  -5  -9   9   63.62    7.39
  -5  -9   9   72.02    7.71
   5   9  -9   71.59    7.91
  -5  -9  10   67.29    7.04
   5   9 -10   72.58    8.33
  -5  -9  11   48.53    5.89
   5   9 -11   48.84    7.07
   5   9 -12   -2.19    2.89
  -5  -9  13   64.44    7.01
   5   9 -13   74.17    9.58
  -5  -9  14   41.39    5.55
   5   9 -14   43.02    7.83
  -5  -9  15    0.88    3.26
  -5  -8   1  595.08   45.46
   5   8  -1  576.57   42.55
  -5  -8   2  185.70   15.04
   5   8  -2  201.75   14.34
   5   8  -2  211.23   17.17
  -5  -8   3    6.93    3.31
   5   8  -3    3.98    1.66
   5   8  -3    3.06    2.74
  -5  -8   4  491.60   32.21
  -5  -8   4  532.58   40.68
   5   8  -4  541.43   36.41
   5   8  -4  491.22   36.58
  -5  -8   5  206.68   15.13
   5   8  -5  230.54   16.90
   5   8  -5  211.74   17.34
  -5  -8   6    3.99    2.23
  -5  -8   6    4.51    2.89
   5   8  -6    4.13    2.11
  -5  -8   7   46.08    5.49
  -5  -8   7   48.79    5.57
  -5  -8   8  126.67   10.70
  -5  -8   8  142.91   12.22
   5   8  -8  144.60   12.21
  -5  -8   9   76.38    7.84
  -5  -8   9   86.44    8.26
   5   8  -9   89.85    8.84
  -5  -8  10    7.13    2.87
  -5  -8  10    5.71    2.94
   5   8 -10    6.76    2.98
  -5  -8  11   30.48    5.69
   5   8 -11   34.81    5.52
  -5  -8  12  122.23   10.95
   5   8 -12  123.17   11.98
  -5  -8  13   65.01    6.84
   5   8 -13   68.16    8.68
  -5  -8  14   -0.55    2.87
   5   8 -14    2.23    3.35
  -5  -8  15    7.39    3.43
   5   8 -15    7.54    4.89
  -5  -8  16   18.67    4.31
  -5  -8  17   11.56    4.33
  -5  -7   1   70.47    6.21
  -5  -7   1   81.99    8.55
   5   7  -1   65.38    5.35
   5   7  -1   67.95    6.07
  -5  -7   2  132.21   10.33
  -5  -7   2  113.54    9.75
   5   7  -2  135.06   10.19
   5   7  -2  127.69   10.75
  -5  -7   3  355.15   23.77
  -5  -7   3  376.31   29.21
   5   7  -3  358.01   27.19
  -5  -7   4  149.26   11.13
  -5  -7   4  170.52   14.41
   5   7  -4  153.19   11.21
   5   7  -4  158.55   13.13
  -5  -7   5   14.71    3.22
   5   7  -5   16.78    2.83
   5   7  -5   12.16    2.94
  -5  -7   6  267.38   18.60
  -5  -7   6  280.72   21.69
   5   7  -6  298.11   21.23
  -5  -7   7  151.71   12.07
  -5  -7   7  161.81   13.70
   5   7  -7  142.18   11.00
  -5  -7   8   26.16    4.06
  -5  -7   8   26.47    4.01
   5   7  -8   27.09    4.25
  -5  -7   9    3.59    2.36
  -5  -7   9    2.42    2.61
   5   7  -9    9.76    2.93
  -5  -7  10  164.09   13.45
  -5  -7  10  157.31   12.94
   5   7 -10  167.11   13.81
  -5  -7  11   96.50    9.14
  -5  -7  11   86.93    7.85
   5   7 -11  108.69   10.59
  -5  -7  12   -0.02    2.46
  -5  -7  12    0.35    2.86
   5   7 -12    0.76    2.36
  -5  -7  13   13.03    3.90
   5   7 -13   17.40    4.48
  -5  -7  14    8.65    3.44
   5   7 -14    7.40    3.67
  -5  -7  15   26.43    4.60
   5   7 -15   25.98    5.73
   5   7 -16    5.70    4.25
  -5  -7  17   10.33    3.95
  -5  -6   1  388.02   25.82
  -5  -6   1  366.26   27.96
   5   6  -1  382.38   24.98
   5   6  -1  382.31   28.64
  -5  -6   2  529.83   34.41
  -5  -6   2  520.61   38.64
   5   6  -2  536.62   34.71
   5   6  -2  541.73   40.37
  -5  -6   3   14.14    2.37
  -5  -6   3   24.48    3.87
   5   6  -3   15.34    2.27
   5   6  -3   21.73    3.41
  -5  -6   4  249.74   17.27
  -5  -6   4  251.71   19.57
   5   6  -4  254.38   17.52
  -5  -6   5  234.82   16.41
  -5  -6   5  248.80   19.45
   5   6  -5  242.56   16.96
  -5  -6   6  232.47   16.85
  -5  -6   6  225.05   17.46
   5   6  -6  223.62   15.90
  -5  -6   7   -0.05    1.49
  -5  -6   7    0.82    2.18
   5   6  -7   -0.03    1.29
  -5  -6   8   75.34    7.36
  -5  -6   8   60.05    5.79
   5   6  -8   69.09    6.73
  -5  -6   9  299.60   21.60
  -5  -6   9  296.82   22.98
   5   6  -9  285.34   20.32
  -5  -6  10   31.37    4.56
  -5  -6  10   31.47    4.39
   5   6 -10   33.63    4.74
  -5  -6  11    8.31    2.79
  -5  -6  11    7.13    3.13
   5   6 -11    8.01    3.01
  -5  -6  12   86.23    8.42
  -5  -6  12   82.06    7.82
   5   6 -12   81.61    8.67
   5   6 -13   39.57    6.05
   5   6 -14   11.19    4.07
  -5  -6  15    3.68    3.30
  -5  -6  16   28.74    5.01
   5   6 -16   30.56    6.20
  -5  -6  17   17.52    4.35
  -5  -6  18    1.40    3.72
  -5  -5   1  240.37   19.50
   5   5  -1  227.83   15.11
  -5  -5   2   42.09    4.09
  -5  -5   2   34.10    4.11
   5   5  -2   43.30    4.04
   5   5  -2   35.39    3.82
  -5  -5   3  570.31   37.10
   5   5  -3  552.14   34.95
   5   5  -3  584.24   43.72
  -5  -5   4  234.22   16.02
  -5  -5   4  253.54   19.81
   5   5  -4  244.44   16.79
   5   5  -4  238.00   18.37
  -5  -5   5    1.89    1.56
  -5  -5   5    0.91    1.79
   5   5  -5    1.65    1.35
  -5  -5   6    3.60    1.68
  -5  -5   6    4.92    2.15
   5   5  -6    5.71    1.88
  -5  -5   7  240.85   17.41
  -5  -5   7  220.24   16.67
   5   5  -7  240.73   17.33
  -5  -5   8  299.33   21.09
  -5  -5   8  288.42   21.73
   5   5  -8  303.43   21.47
  -5  -5   9    9.53    2.69
  -5  -5   9   10.35    2.83
   5   5  -9   10.47    2.70
  -5  -5  10  108.01    9.58
  -5  -5  10   92.22    7.94
   5   5 -10   98.83    9.06
  -5  -5  11  133.59   11.23
   5   5 -11  129.82   11.11
  -5  -5  12   47.13    6.03
  -5  -5  12   52.94    5.99
   5   5 -12   53.28    6.49
  -5  -5  13    5.56    2.81
  -5  -5  13    3.23    3.20
   5   5 -13    3.41    2.67
  -5  -5  14  106.05    9.92
   5   5 -14   98.83   10.23
  -5  -5  15   94.35    9.25
   5   5 -15  100.21   10.81
  -5  -5  16   16.68    4.37
   5   5 -16   15.42    4.67
  -5  -5  17    7.30    4.02
   5   5 -17    3.00    3.49
  -5  -5  18   20.11    4.66
  -5  -4   1  852.41   52.83
   5   4  -1  909.81   58.22
  -5  -4   2  789.46   48.96
  -5  -4   2  828.30   60.96
   5   4  -2  826.85   52.29
   5   4  -2  856.29   63.37
  -5  -4   3    4.75    1.98
   5   4  -3    2.79    1.17
   5   4  -3    2.85    1.74
  -5  -4   4    3.14    1.27
  -5  -4   4    4.26    2.09
   5   4  -4    3.83    1.30
   5   4  -4    0.99    1.63
  -5  -4   5  317.78   21.54
  -5  -4   5  297.23   21.75
   5   4  -5  328.93   22.49
  -5  -4   6  302.14   20.69
   5   4  -6  298.15   20.32
  -5  -4   7  105.91    8.66
  -5  -4   7  106.08    8.83
  -5  -4   8  151.15   11.61
  -5  -4   8  140.60   10.99
   5   4  -8  160.07   12.48
  -5  -4   9  204.55   15.05
  -5  -4   9  201.12   15.68
   5   4  -9  208.41   15.51
  -5  -4  10  114.97    9.58
   5   4 -10  132.03   11.15
  -5  -4  11   -0.52    1.79
  -5  -4  11   -0.23    2.67
  -5  -4  12   50.36    5.90
  -5  -4  12   40.38    4.83
   5   4 -12   51.21    6.30
  -5  -4  13  100.82    9.21
  -5  -4  13   89.64    8.21
   5   4 -13   99.39    9.88
  -5  -4  14   52.93    6.15
  -5  -4  14   40.22    5.01
  -5  -4  15   -1.23    3.04
   5   4 -15    0.05    2.78
  -5  -4  16   42.34    5.59
   5   4 -16   57.24    8.12
  -5  -4  17   30.92    5.26
   5   4 -17   32.00    6.36
  -5  -4  18   11.06    4.41
   5   4 -18   11.83    5.13
  -5  -3   1  272.19   17.10
  -5  -3   1  334.30   27.39
   5   3  -1  289.14   18.67
  -5  -3   2  160.22   10.82
  -5  -3   2  187.08   15.33
   5   3  -2  161.52   12.15
  -5  -3   3  195.99   13.42
  -5  -3   3  198.14   15.23
   5   3  -3  209.44   14.57
   5   3  -3  183.25   13.57
  -5  -3   4  345.24   22.59
  -5  -3   4  354.55   26.26
   5   3  -4  363.38   24.14
  -5  -3   5  631.44   40.66
  -5  -3   5  604.70   43.18
   5   3  -5  670.43   44.21
  -5  -3   6    3.50    1.55
  -5  -3   6    3.82    1.77
   5   3  -6    3.94    1.53
  -5  -3   7  487.60   34.28
   5   3  -7  595.26   40.76
  -5  -3   8  236.07   16.67
   5   3  -8  234.96   16.77
  -5  -3   9   41.21    4.53
  -5  -3   9   43.05    4.51
   5   3  -9   46.66    5.18
  -5  -3  10    5.53    2.01
  -5  -3  10    6.47    2.73
   5   3 -10    3.76    1.99
  -5  -3  11  114.93    9.70
  -5  -3  11  100.88    8.70
   5   3 -11  110.54    9.85
  -5  -3  12  223.35   17.15
  -5  -3  12  186.54   14.68
  -5  -3  13   30.95    4.79
   5   3 -13   31.17    5.01
  -5  -3  14   58.64    6.44
  -5  -3  14   48.46    5.87
   5   3 -14   57.61    7.33
  -5  -3  15  137.49   11.74
  -5  -3  15  119.32   10.56
   5   3 -15  138.93   13.25
  -5  -3  16   46.64    6.24
   5   3 -16   50.92    7.32
  -5  -3  17    1.52    3.85
  -5  -3  18    6.73    4.35
   5   3 -18   10.37    4.54
  -5  -2   1   29.79    2.57
   5   2  -1   33.28    2.82
   5   2  -1   44.03    3.86
  -5  -2   2  288.91   18.65
  -5  -2   2  316.46   24.98
   5   2  -2  293.53   19.02
   5   2  -2  284.30   20.64
  -5  -2   3  706.83   51.53
  -5  -2   4   96.45    7.44
  -5  -2   4   96.53    7.60
   5   2  -4   98.58    7.38
  -5  -2   5  154.20   11.10
  -5  -2   5  140.30   10.32
   5   2  -5  166.15   12.17
  -5  -2   6  565.92   36.97
  -5  -2   6  505.19   35.25
   5   2  -6  607.64   40.92
  -5  -2   7  232.65   16.22
  -5  -2   7  219.84   16.35
   5   2  -7  237.96   16.90
  -5  -2   8    8.92    2.06
  -5  -2   8    7.88    2.31
   5   2  -8    9.94    2.20
  -5  -2   9   56.75    5.42
  -5  -2   9   51.32    4.97
   5   2  -9   62.05    6.22
  -5  -2  10  333.16   24.49
   5   2 -10  386.31   27.76
  -5  -2  11  196.41   14.44
  -5  -2  11  183.00   14.37
   5   2 -11  209.24   16.28
  -5  -2  12   24.49    3.60
  -5  -2  12   25.39    4.20
   5   2 -12   25.43    4.42
  -5  -2  13  241.30   18.04
  -5  -2  13  207.16   16.33
   5   2 -13  230.00   18.06
  -5  -2  14   90.22    8.03
  -5  -2  14   91.43    8.84
   5   2 -14  107.03   10.60
  -5  -2  15    6.83    2.43
  -5  -2  15    7.82    3.82
   5   2 -15    7.71    3.26
  -5  -2  16    9.31    4.24
   5   2 -16   10.87    3.93
  -5  -2  17   71.20    7.70
   5   2 -17   98.41   11.25
  -5  -2  18   67.63    7.44
  -5  -2  18   61.16    8.04
   5   2 -18   77.18    9.98
   5   2 -18   84.53   11.40
  -5  -2  19   -0.19    4.06
  -5  -2  19    3.17    4.12
   5   2 -19    1.39    3.85
  -5  -1   1  281.56   17.96
   5   1  -1  293.20   18.92
   5   1  -1  289.79   21.11
  -5  -1   2   90.64    6.43
   5   1  -2   92.35    6.55
  -5  -1   3  211.33   13.95
  -5  -1   3  245.32   19.54
   5   1  -3  203.81   13.13
  -5  -1   4 1057.69   66.50
   5   1  -4 1075.96   68.01
  -5  -1   5  524.64   33.70
  -5  -1   5  502.11   35.68
   5   1  -5  553.59   36.52
  -5  -1   6   27.80    3.01
   5   1  -6   28.58    3.23
  -5  -1   7  115.86    8.72
  -5  -1   7  115.90    9.09
  -5  -1   8  368.23   25.41
  -5  -1   8  310.09   22.09
   5   1  -8  360.42   24.98
  -5  -1   9  370.40   25.16
  -5  -1   9  323.99   23.17
   5   1  -9  390.81   27.65
  -5  -1  10   13.90    2.47
  -5  -1  10   18.09    3.35
   5   1 -10   17.74    3.22
  -5  -1  11  248.37   17.88
  -5  -1  11  212.34   16.07
   5   1 -11  251.45   18.98
  -5  -1  12  187.50   14.12
  -5  -1  12  163.38   13.05
   5   1 -12  187.39   15.16
  -5  -1  13   17.12    3.02
  -5  -1  13   23.51    4.32
  -5  -1  14    4.79    2.23
  -5  -1  14    3.87    3.22
   5   1 -14    6.18    3.01
  -5  -1  15   32.96    4.44
  -5  -1  15   27.23    4.74
  -5  -1  15   26.49    4.79
   5   1 -15   30.34    5.46
  -5  -1  16   95.63    8.97
  -5  -1  16   83.14    8.24
  -5  -1  16   73.96    8.67
   5   1 -16  107.38   11.57
   5   1 -16  107.22   11.91
  -5  -1  17   19.03    4.52
   5   1 -17   21.29    5.08
   5   1 -17   23.16    5.72
  -5  -1  18   32.21    5.70
  -5  -1  18   30.82    6.88
   5   1 -18   36.70    7.40
  -5  -1  19   51.08    6.97
  -5  -1  19   52.86    8.91
   5   1 -19   67.09    9.81
   5   0  -1   87.47    5.95
  -5   0   2   78.92    5.65
   5   0  -2   76.07    5.33
  -5   0   3  520.69   33.09
  -5   0   4  143.71    9.83
   5   0  -4  144.60   10.02
  -5   0   5   67.86    5.28
  -5   0   6  835.67   55.30
  -5   0   6  711.76   49.71
  -5   0   6  709.39   49.91
   5   0  -6  845.32   56.39
  -5   0   7  347.11   24.30
  -5   0   7  370.69   27.34
   5   0  -7  455.75   32.20
  -5   0   8  169.45   12.25
  -5   0   8  158.40   12.06
  -5   0   8  154.03   12.16
   5   0  -8  169.48   12.66
  -5   0   9  161.22   12.11
  -5   0   9  131.23   10.08
  -5   0   9  127.45   10.29
   5   0  -9  162.49   12.85
  -5   0  10  436.00   30.96
  -5   0  10  356.36   26.55
  -5   0  10  329.89   24.60
  -5   0  11  113.45    8.89
   5   0 -11  114.25    9.90
  -5   0  12    0.59    1.41
  -5   0  12    1.07    2.29
  -5   0  12    1.72    2.53
   5   0 -12   -0.07    1.86
  -5   0  13   35.74    4.24
  -5   0  13   31.81    4.26
  -5   0  13   27.18    4.92
   5   0 -13   36.99    5.36
  -5   0  14  122.35   10.33
  -5   0  14  104.42    9.46
  -5   0  14   93.34    9.75
   5   0 -14  116.11   11.10
  -5   0  15   97.50    8.67
   5   0 -15   93.09    9.60
   5   0 -15   98.00    9.66
  -5   0  16    3.78    2.30
   5   0 -16   -1.24    2.70
   5   0 -16    3.21    3.40
  -5   0  17  116.64   10.98
  -5   0  17  106.84   12.47
   5   0 -17  132.76   13.29
   5   0 -17  124.74   12.88
  -5   0  18   53.75    6.81
   5   0 -18   64.70    8.84
   5   0 -18   64.19    9.07
  -5   0  19   17.69    4.99
  -5   0  19   19.09    8.18
   5   0 -19   24.05    6.04
  -5   1   1  425.76   26.28
   5  -1  -1  440.39   27.64
   5  -1  -1  450.66   32.99
  -5   1   2 1094.67   69.00
   5  -1  -2 1057.93   65.23
  -5   1   3    0.90    0.59
   5  -1  -3    1.61    0.68
  -5   1   4  202.21   13.27
   5  -1  -4  206.43   13.84
  -5   1   5  492.62   31.02
   5  -1  -5  516.15   33.54
  -5   1   6  497.60   33.01
  -5   1   6  446.95   32.05
  -5   1   6  453.73   33.16
  -5   1   7   14.69    2.02
  -5   1   7   14.01    1.79
   5  -1  -7   11.69    2.15
  -5   1   8  577.93   38.35
  -5   1   8  495.88   37.16
   5  -1  -8  556.81   36.85
  -5   1   9  473.14   31.86
  -5   1   9  390.87   28.88
   5  -1  -9  479.62   33.05
  -5   1  10   19.83    2.72
  -5   1  10   15.47    4.96
   5  -1 -10   20.28    3.38
  -5   1  11  134.91   10.04
  -5   1  11  129.40   12.67
   5  -1 -11  151.44   12.52
  -5   1  12  217.39   15.42
  -5   1  12  200.66   17.61
   5  -1 -12  236.09   18.30
   5  -1 -12  224.76   17.26
  -5   1  13  134.27   10.52
  -5   1  13  116.74    9.84
  -5   1  13  123.91   13.46
   5  -1 -13  152.03   13.42
   5  -1 -13  147.97   12.42
  -5   1  14   26.44    3.71
  -5   1  14   23.88    3.89
   5  -1 -14   25.85    4.34
  -5   1  15   73.08    7.38
  -5   1  15   76.84   11.37
   5  -1 -15   76.37    8.63
  -5   1  16  159.30   13.18
  -5   1  16  119.46   10.01
  -5   1  16  133.16   15.92
   5  -1 -16  160.04   14.81
   5  -1 -16  182.17   15.93
  -5   1  17   18.33    4.26
  -5   1  17    9.54    8.77
   5  -1 -17   24.82    5.41
   5  -1 -17   23.35    5.57
  -5   1  18    2.24    3.56
  -5   1  18    2.30    9.67
   5  -1 -18    0.88    3.32
   5  -1 -18    2.36    4.20
  -5   1  19   22.91    4.88
  -5   1  19   22.71   12.39
   5  -1 -19   22.56    6.24
   5  -1 -19   25.91    6.45
   5  -1 -20   59.18    9.44
  -5   2   1  548.27   34.97
   5  -2  -1  530.53   33.16
   5  -2  -1  497.68   29.94
   5  -2  -1  540.59   39.54
  -5   2   2  263.82   17.46
   5  -2  -2  235.27   14.75
   5  -2  -2  229.17   14.12
   5  -2  -3  286.10   19.22
   5  -2  -3  236.84   16.89
  -5   2   4  264.44   17.04
   5  -2  -4  270.08   17.78
   5  -2  -4  258.80   17.05
  -5   2   5    1.28    0.66
  -5   2   5    0.30    0.75
   5  -2  -5    2.76    1.05
   5  -2  -5    1.41    0.86
  -5   2   6  425.90   27.83
  -5   2   6  401.10   28.77
   5  -2  -6  423.91   28.02
   5  -2  -6  398.98   26.09
  -5   2   7  763.58   49.44
  -5   2   7  685.16   48.19
   5  -2  -7  794.09   52.71
   5  -2  -7  719.57   46.43
   5  -2  -8  179.84   13.04
  -5   2   9  108.66    8.18
  -5   2   9   95.96   12.98
   5  -2  -9  114.11    9.33
   5  -2  -9  108.26    8.22
  -5   2  10  377.65   25.29
   5  -2 -10  390.54   27.35
   5  -2 -10  348.74   22.72
  -5   2  11  389.77   25.77
  -5   2  11  373.44   33.17
   5  -2 -11  424.56   30.25
   5  -2 -11  404.97   27.51
  -5   2  12   82.11    6.96
  -5   2  12   84.11   15.76
   5  -2 -12   90.39    8.67
   5  -2 -12   96.77    8.64
  -5   2  13   23.74    3.41
   5  -2 -13   23.95    4.31
   5  -2 -13   21.74    3.69
  -5   2  14  242.75   17.51
  -5   2  14  219.91   25.32
   5  -2 -14  252.21   19.81
   5  -2 -14  262.06   19.53
  -5   2  15  105.48    9.20
  -5   2  15  102.32   19.43
   5  -2 -15  111.30   11.02
   5  -2 -15  119.73   10.65
  -5   2  16    1.03    2.17
  -5   2  16   22.03   16.05
   5  -2 -16   -1.81    2.75
   5  -2 -16    0.26    2.88
  -5   2  17   38.94    5.83
  -5   2  17   24.63    4.40
  -5   2  17   47.63   19.73
   5  -2 -17   38.57    6.28
  -5   2  18   51.59    6.37
  -5   2  18   63.05   24.48
   5  -2 -18   65.76    8.91
   5  -2 -18   76.84    9.38
  -5   2  19   14.95    4.37
   5  -2 -19   18.60    5.53
   5  -2 -20    9.18    4.90
   5  -3  -1  835.68   60.47
  -5   3   2   92.71    5.92
   5  -3  -2  105.21    6.78
   5  -3  -2  108.95    9.00
  -5   3   3  151.97   10.07
  -5   3   3  152.74   11.69
   5  -3  -3  153.18   10.11
   5  -3  -3  149.84    9.46
  -5   3   4   90.74    6.69
  -5   3   4   80.71    6.36
   5  -3  -4   81.82    5.90
   5  -3  -4   77.86    5.10
   5  -3  -4   77.49    6.37
  -5   3   5  716.88   46.11
  -5   3   5  641.09   44.85
   5  -3  -5  716.16   46.25
   5  -3  -5  699.54   44.14
  -5   3   6  214.02   14.31
  -5   3   6  200.58   14.44
   5  -3  -6  219.59   15.13
   5  -3  -6  217.11   14.31
  -5   3   7   14.88    2.03
  -5   3   7   16.20    2.18
   5  -3  -7   12.42    1.66
  -5   3   8  270.41   18.13
   5  -3  -8  282.52   19.75
   5  -3  -8  261.47   16.95
  -5   3   9  549.86   35.43
  -5   3   9  530.22   38.89
   5  -3  -9  592.82   40.22
   5  -3  -9  552.94   35.54
  -5   3  10  143.97   10.34
  -5   3  10  142.53   12.97
   5  -3 -10  164.99   13.03
   5  -3 -10  164.34   11.96
  -5   3  11    2.55    1.51
  -5   3  11    4.74    6.38
   5  -3 -11    2.21    1.73
  -5   3  12  224.72   15.72
  -5   3  12  236.94   24.46
   5  -3 -12  252.74   19.45
   5  -3 -12  232.75   16.31
  -5   3  13  275.21   18.65
  -5   3  13  251.18   27.69
   5  -3 -13  327.20   24.81
   5  -3 -13  333.14   24.03
  -5   3  14   31.31    4.40
  -5   3  14   27.86   14.86
   5  -3 -14   26.19    4.85
   5  -3 -14   29.35    4.07
  -5   3  15   66.40    7.16
  -5   3  15   56.65   19.66
   5  -3 -15   58.77    7.52
   5  -3 -15   63.83    6.56
  -5   3  16  125.74   11.47
  -5   3  16   97.25   22.98
   5  -3 -16  128.90   12.78
   5  -3 -16  118.84   10.31
  -5   3  17   70.18    8.17
  -5   3  17   55.50   21.72
   5  -3 -17   62.57    8.50
   5  -3 -17   62.89    7.30
  -5   3  18   -7.88   16.29
   5  -3 -18    2.51    3.14
  -5   3  19   45.17    6.10
  -5   3  19   30.49   21.25
   5  -3 -19   60.79    9.54
   5  -3 -19   63.77    8.56
   5  -3 -20   78.95   11.11
   5  -4  -1  388.78   28.58
  -5   4   2   22.54    2.76
   5  -4  -2   22.56    1.71
   5  -4  -2   21.20    1.52
   5  -4  -2   19.80    2.80
  -5   4   3  360.82   23.51
  -5   4   3  323.28   23.07
   5  -4  -3  365.00   23.58
   5  -4  -3  348.86   21.70
   5  -4  -3  371.94   29.61
   5  -4  -4 1117.27   69.30
   5  -4  -4 1180.41   89.73
  -5   4   5  153.26   10.56
   5  -4  -5  172.21   12.07
   5  -4  -5  170.61   11.31
   5  -4  -5  144.93   11.44
  -5   4   6  225.98   15.59
   5  -4  -6  220.47   15.03
   5  -4  -6  210.71   13.29
  -5   4   7  636.48   41.71
  -5   4   7  592.25   42.41
   5  -4  -7  623.54   39.51
  -5   4   8  185.62   13.04
  -5   4   8  170.71   12.52
   5  -4  -8  212.24   15.68
   5  -4  -8  197.59   13.31
  -5   4   9    4.72    1.77
   5  -4  -9   12.06    2.46
   5  -4  -9    7.02    1.60
  -5   4  10  234.12   16.53
  -5   4  10  233.05   18.28
   5  -4 -10  243.73   17.93
   5  -4 -10  228.29   15.10
  -5   4  11  364.18   24.29
  -5   4  11  354.91   26.90
   5  -4 -11  407.67   29.11
   5  -4 -11  390.83   26.03
  -5   4  12   95.25    7.97
  -5   4  12   92.26    9.60
   5  -4 -12  108.50    9.98
   5  -4 -12  118.22    9.33
  -5   4  13   32.40    4.37
  -5   4  13   32.20    7.59
   5  -4 -13   34.43    5.18
   5  -4 -13   33.27    3.98
  -5   4  14  159.34   12.93
  -5   4  14  142.50   15.50
   5  -4 -14  184.10   15.93
   5  -4 -14  167.32   12.52
  -5   4  15  144.30   12.63
  -5   4  15  118.25   15.64
   5  -4 -15  145.96   13.64
   5  -4 -15  147.26   11.56
  -5   4  16   17.51   11.00
   5  -4 -16   25.18    5.48
   5  -4 -16   20.18    4.51
  -5   4  17    4.29    3.24
  -5   4  17    6.46   11.03
   5  -4 -17    4.79    3.75
   5  -4 -17    2.82    2.94
  -5   4  18   72.46   16.14
   5  -4 -18   86.87   10.77
   5  -4 -18  102.06    9.86
   5  -4 -19   35.90    7.94
   5  -4 -19   33.91    6.14
   5  -4 -20   -0.81    3.86
  -5   5   1   93.10    7.72
   5  -5  -1  118.36    9.98
  -5   5   2  845.52   62.13
   5  -5  -2  849.87   53.08
   5  -5  -2  837.16   60.97
  -5   5   3  695.55   50.50
   5  -5  -3  723.30   45.66
   5  -5  -3  679.95   41.12
   5  -5  -3  787.06   60.83
  -5   5   4   16.07    2.85
   5  -5  -4   14.46    1.60
   5  -5  -4   15.22    7.43
  -5   5   5  450.64   29.68
  -5   5   5  427.55   31.36
   5  -5  -5  443.57   28.67
   5  -5  -5  433.59   27.18
   5  -5  -5  422.23   33.73
  -5   5   6  506.52   33.46
  -5   5   6  473.84   34.11
   5  -5  -6  534.83   35.49
   5  -5  -6  497.82   31.10
   5  -5  -6  486.06   36.51
  -5   5   7  103.77    8.51
  -5   5   7   94.37    7.49
   5  -5  -7  114.49    8.91
   5  -5  -7  105.30    7.19
   5  -5  -7   94.46    8.19
  -5   5   8  142.55   11.20
  -5   5   8  143.15   11.34
   5  -5  -8  137.01   10.24
   5  -5  -8  133.42    8.80
  -5   5   9  431.22   30.67
   5  -5  -9  512.83   35.40
  -5   5  10  278.65   19.26
  -5   5  10  275.48   20.37
   5  -5 -10  326.43   23.64
   5  -5 -10  319.50   21.56
  -5   5  11    0.33    1.84
  -5   5  11    3.57    3.03
   5  -5 -11    1.23    1.85
   5  -5 -11    1.00    1.36
  -5   5  12  264.43   19.57
   5  -5 -12  266.55   20.08
   5  -5 -12  260.39   17.41
  -5   5  13  213.98   17.17
   5  -5 -13  264.25   20.94
  -5   5  14   85.27    8.77
  -5   5  14   72.76    8.87
   5  -5 -14   83.34    8.96
   5  -5 -14   94.23    7.90
  -5   5  15    1.42    2.55
  -5   5  15    0.85    5.29
   5  -5 -15    0.91    2.13
  -5   5  16   54.90    8.71
   5  -5 -16   69.64    8.94
  -5   5  17  146.94   15.06
  -5   5  17   88.17   11.34
  -5   5  18   -2.48    6.99
   5  -5 -18    5.93    4.53
   5  -5 -18    4.58    3.72
   5  -5 -19   10.99    5.17
   5  -5 -19   11.03    4.46
   5  -5 -20   19.47    6.41
   5  -5 -20   16.59    5.41
   5  -5 -21   12.81    6.36
  -5   6   1  732.03   53.57
   5  -6  -1  748.43   46.32
   5  -6  -1  832.82   63.04
  -5   6   2  275.43   21.49
   5  -6  -2  262.36   16.57
   5  -6  -2  262.29   16.61
  -5   6   3  269.63   21.04
   5  -6  -3  257.72   16.53
   5  -6  -3  251.26   15.92
  -5   6   4  738.17   53.92
   5  -6  -4  770.49   49.48
   5  -6  -4  736.79   57.44
  -5   6   5  148.03   11.49
   5  -6  -5  167.04   11.64
   5  -6  -5  154.22   10.13
   5  -6  -5  166.43   19.94
  -5   6   6    6.83    1.57
  -5   6   6    7.83    2.30
   5  -6  -6    8.38    1.65
   5  -6  -6    8.41    1.38
   5  -6  -6    8.74    5.65
  -5   6   7  153.16   11.18
  -5   6   7  140.56   10.64
   5  -6  -7  168.12   12.29
   5  -6  -7  162.04   10.91
   5  -6  -7  157.16   13.81
  -5   6   8  501.29   33.03
  -5   6   8  502.04   36.64
   5  -6  -8  562.38   38.16
   5  -6  -8  539.38   34.85
   5  -6  -8  482.49   36.37
  -5   6   9   43.32    4.41
   5  -6  -9   54.60    5.53
  -5   6  10  215.83   16.69
  -5   6  10  212.00   16.36
   5  -6 -10  230.19   17.10
   5  -6 -10  213.24   14.01
  -5   6  11  362.83   27.06
  -5   6  11  316.73   23.63
   5  -6 -11  347.77   24.84
   5  -6 -11  329.40   21.14
  -5   6  12   99.95   10.01
  -5   6  12   95.60    8.62
   5  -6 -12  109.28   10.15
   5  -6 -12  108.46    8.18
  -5   6  13    1.01    3.35
   5  -6 -13    4.62    2.91
  -5   6  14  105.07   11.32
   5  -6 -14  100.60   10.30
   5  -6 -14   90.04    7.18
  -5   6  15  154.62   13.32
   5  -6 -15  194.74   14.68
  -5   6  16   47.85    8.94
  -5   6  16   35.60    6.18
   5  -6 -16   58.37    8.30
  -5   6  17   15.04    5.71
  -5   6  17   13.49    5.28
   5  -6 -17    9.10    4.16
   5  -6 -17    8.11    3.33
  -5   6  18   27.05    8.28
  -5   6  18   21.14    6.11
   5  -6 -18   27.62    6.60
   5  -6 -18   29.69    5.19
   5  -6 -19   53.81    9.00
   5  -6 -19   54.94    7.24
   5  -6 -20    6.21    4.82
   5  -6 -20    2.63    4.13
  -5   7   1   17.88    1.50
   5  -7  -1   18.80    1.97
   5  -7  -1   17.85    1.88
   5  -7  -1   30.75    4.26
  -5   7   2  498.59   31.33
   5  -7  -2  521.76   33.56
   5  -7  -2  482.84   29.86
   5  -7  -2  522.56   39.75
  -5   7   3  581.10   38.04
  -5   7   3  568.22   41.94
   5  -7  -3  581.02   36.57
   5  -7  -3  628.95   49.14
  -5   7   4   41.76    4.99
   5  -7  -4   44.98    3.60
   5  -7  -4   47.53    4.02
   5  -7  -5  128.69    9.37
   5  -7  -5  109.62    7.60
   5  -7  -5  104.07   16.29
  -5   7   6  471.79   34.78
   5  -7  -6  493.56   32.20
   5  -7  -6  471.66   29.65
   5  -7  -6  528.92   46.53
  -5   7   7  156.36   12.27
   5  -7  -7  175.31   12.08
   5  -7  -7  172.65   16.97
  -5   7   8   16.51    2.74
  -5   7   8   15.58    2.96
   5  -7  -8   18.08    2.89
   5  -7  -8   15.22    2.13
   5  -7  -8   14.85    4.15
  -5   7   9  296.00   22.32
   5  -7  -9  352.33   25.40
   5  -7  -9  278.58   22.07
  -5   7  10  249.68   18.86
  -5   7  10  225.22   17.04
   5  -7 -10  258.33   19.00
   5  -7 -10  247.67   16.49
  -5   7  11    1.01    2.61
   5  -7 -11    2.82    2.21
   5  -7 -11    2.10    1.50
  -5   7  12   40.34    6.47
   5  -7 -12   50.11    6.24
   5  -7 -12   43.72    4.15
  -5   7  13  143.02   11.94
   5  -7 -13  169.94   14.65
  -5   7  14   70.33    9.91
  -5   7  14   56.09    6.30
   5  -7 -14   74.57    8.78
   5  -7 -14   72.84    6.49
  -5   7  15    0.68    4.28
  -5   7  15    2.52    3.64
  -5   7  16   45.36    9.66
  -5   7  16   39.44    5.89
   5  -7 -16   40.56    7.08
   5  -7 -16   34.91    4.99
  -5   7  17   62.56   10.97
  -5   7  17   39.65    6.04
   5  -7 -17   47.03    7.70
   5  -7 -17   46.57    5.69
  -5   7  18   38.60    9.80
   5  -7 -18   42.34    7.85
   5  -7 -18   31.40    5.32
   5  -7 -19    0.80    3.98
   5  -7 -19   -1.55    4.08
   5  -7 -20   12.92    6.08
   5  -7 -20   16.55    5.46
  -5   8   1  305.30   19.80
  -5   8   1  271.41   20.86
   5  -8  -1  274.21   17.58
   5  -8  -1  291.88   19.19
   5  -8  -1  331.95   26.74
  -5   8   2   16.68    1.72
  -5   8   2   18.49    3.78
   5  -8  -2   16.61    2.02
   5  -8  -2   15.92    2.08
   5  -8  -2   18.24    4.27
  -5   8   3   54.18    4.10
  -5   8   3   66.64    7.22
   5  -8  -3   57.71    4.44
   5  -8  -3   52.77    4.36
   5  -8  -3   68.27    8.75
  -5   8   4  223.23   15.56
  -5   8   4  191.93   14.89
   5  -8  -4  213.95   14.17
   5  -8  -4  223.74   15.39
   5  -8  -4  222.69   21.08
   5  -8  -5  503.18   33.16
   5  -8  -5  470.26   30.05
   5  -8  -5  461.30   42.37
  -5   8   6   41.85    5.28
   5  -8  -6   44.11    4.07
   5  -8  -6   39.20    3.86
   5  -8  -6   53.55   16.03
  -5   8   7  158.90   13.07
   5  -8  -7  162.61   11.53
   5  -8  -7  171.33   19.12
  -5   8   8  309.30   23.18
   5  -8  -8  350.53   24.27
   5  -8  -8  350.85   23.82
   5  -8  -8  319.60   26.67
  -5   8   9   35.97    4.56
   5  -8  -9   46.69    5.13
   5  -8  -9   41.56    6.37
  -5   8  10   14.05    3.36
  -5   8  10   13.83    3.46
   5  -8 -10   14.24    3.13
   5  -8 -10   14.86    2.68
   5  -8 -10   13.87    3.54
  -5   8  11  115.55   10.86
  -5   8  11   87.72    7.95
   5  -8 -11   98.37    9.03
   5  -8 -11   99.54    7.77
  -5   8  12  192.45   16.82
  -5   8  12  143.60   11.68
   5  -8 -12  165.56   13.68
   5  -8 -12  168.24   12.24
   5  -8 -13   14.16    3.85
  -5   8  14   45.11    8.19
   5  -8 -14   38.88    6.03
   5  -8 -14   41.80    4.80
  -5   8  15  170.90   18.35
  -5   8  15   96.49    8.60
   5  -8 -15  113.76    9.39
  -5   8  16   65.22   12.14
  -5   8  16   49.88    6.17
   5  -8 -16   59.77    8.74
  -5   8  17    9.07    6.23
  -5   8  17    3.67    3.68
   5  -8 -17    6.83    4.21
   5  -8 -17    2.48    3.41
  -5   8  18   25.02   10.22
   5  -8 -18   17.22    5.86
   5  -8 -18   19.62    4.99
   5  -8 -19   32.91    7.46
   5  -8 -19   38.39    6.84
   5  -8 -20   22.56    7.88
   5  -8 -20   19.22    6.19
  -5   9   1    8.17    1.37
  -5   9   1    7.19    3.40
   5  -9  -1    6.63    2.12
   5  -9  -1    6.02    1.80
  -5   9   2  270.82   17.85
  -5   9   2  266.00   21.44
   5  -9  -2  244.27   15.94
   5  -9  -2  245.57   16.17
   5  -9  -2  287.32   23.90
  -5   9   3  512.51   33.93
  -5   9   3  450.91   33.51
   5  -9  -3  460.77   29.06
   5  -9  -3  482.80   31.43
   5  -9  -3  502.60   40.02
  -5   9   4  184.22   13.09
  -5   9   4  170.58   14.36
   5  -9  -4  156.92   10.33
   5  -9  -4  180.90   13.13
  -5   9   5   22.39    2.94
  -5   9   5   28.06    5.00
   5  -9  -5   28.28    3.01
   5  -9  -5   24.39    3.25
   5  -9  -5   34.42   12.80
  -5   9   6  317.56   24.94
   5  -9  -6  313.07   20.85
   5  -9  -6  308.57   20.76
   5  -9  -7  328.94   22.70
   5  -9  -7  292.23   19.41
  -5   9   8    8.04    3.31
   5  -9  -8    7.78    2.23
   5  -9  -8    8.53    2.65
   5  -9  -8   -0.09    7.53
  -5   9   9   70.73    7.24
   5  -9  -9   75.89    6.94
   5  -9  -9   74.10    6.69
   5  -9  -9   76.69    9.84
  -5   9  10   81.12    7.64
   5  -9 -10   98.71    9.02
   5  -9 -10   89.14    7.81
   5  -9 -10   79.54    9.13
  -5   9  11  103.47    9.56
  -5   9  12    2.09    3.52
   5  -9 -12    0.49    2.45
   5  -9 -12    1.49    2.68
  -5   9  13  147.10   12.35
   5  -9 -13  179.44   15.57
  -5   9  14  265.66   23.89
  -5   9  14  155.21   12.52
   5  -9 -14  188.52   16.38
   5  -9 -14  186.02   14.25
  -5   9  15    8.99    5.35
  -5   9  15    4.38    3.41
   5  -9 -15    6.52    3.27
  -5   9  16   25.77    4.54
   5  -9 -16   20.79    5.49
  -5   9  17   98.45   14.19
   5  -9 -17   82.38   10.67
   5  -9 -17   77.50    8.57
   5  -9 -18   51.37    9.26
   5  -9 -18   40.42    6.75
   5  -9 -19    3.17    4.89
   5  -9 -19    1.89    4.53
  -5  10   1  201.38   13.17
   5 -10  -1  195.96   14.39
   5 -10  -1  191.62   13.48
   5 -10  -1  248.40   21.29
  -5  10   2  230.98   15.86
  -5  10   2  211.63   17.66
   5 -10  -2  191.74   13.13
   5 -10  -2  204.00   14.33
   5 -10  -2  232.66   20.22
  -5  10   3   -0.58    1.34
  -5  10   3   -2.92    3.30
   5 -10  -3    0.68    1.42
   5 -10  -3   -1.26    1.80
   5 -10  -3   -2.88    5.23
  -5  10   4  345.13   23.35
  -5  10   4  334.99   26.54
   5 -10  -4  314.88   20.21
   5 -10  -4  333.56   22.81
   5 -10  -4  344.61   30.50
  -5  10   5  233.11   18.04
   5 -10  -5  256.58   17.24
   5 -10  -5  308.67   22.69
   5 -10  -5  273.51   29.84
  -5  10   6   47.93    6.58
   5 -10  -6   45.85    4.38
   5 -10  -6   47.06    5.31
   5 -10  -6   39.59   17.60
  -5  10   7    7.67    3.89
   5 -10  -7    6.35    2.07
   5 -10  -7    6.15    2.68
  -5  10   8  105.20   10.09
   5 -10  -8   95.77    8.21
   5 -10  -8   95.36   16.78
   5 -10  -9  188.17   14.29
   5 -10  -9  173.75   13.29
   5 -10  -9  176.91   18.63
  -5  10  10   33.10    5.08
   5 -10 -10   38.37    5.00
   5 -10 -10   32.33    4.99
   5 -10 -10   34.42    7.25
  -5  10  11   43.67    5.82
   5 -10 -11   50.43    6.36
   5 -10 -11   47.54    6.17
   5 -10 -11   46.40    7.02
  -5  10  12  131.35   10.95
   5 -10 -12  180.55   15.39
   5 -10 -12  183.89   15.18
  -5  10  13   49.18    6.31
   5 -10 -13   56.90    7.32
   5 -10 -13   54.34    6.80
  -5  10  14    0.63    3.67
   5 -10 -14    4.88    3.45
   5 -10 -14    2.44    3.63
   5 -10 -15   26.98    6.34
   5 -10 -15   32.03    6.26
  -5  10  16   50.67    6.49
   5 -10 -16   66.93    9.60
   5 -10 -16   43.12    7.96
  -5  10  17   25.39    7.29
   5 -10 -17   25.04    6.58
   5 -10 -17   17.21    5.60
   5 -10 -18    5.68    5.24
   5 -10 -18    4.06    4.62
  -5  11   1   38.63    3.69
  -5  11   1   39.79    5.66
   5 -11  -1   40.09    6.01
  -5  11   2   50.25    6.53
   5 -11  -2   43.93    5.14
   5 -11  -2   50.49    7.19
  -5  11   3  171.03   15.02
   5 -11  -3  155.22   12.18
   5 -11  -3  193.99   18.76
  -5  11   4   72.42    8.20
   5 -11  -4   57.49   10.75
  -5  11   5    2.22    2.30
  -5  11   5    2.89    3.98
   5 -11  -5    2.25    1.83
   5 -11  -5    1.35    2.54
   5 -11  -5    1.81   10.92
  -5  11   6   74.39    6.95
   5 -11  -6   77.12    6.59
   5 -11  -6   75.21    7.80
   5 -11  -6   75.92   20.95
   5 -11  -7  116.82    9.34
   5 -11  -7   98.69    9.78
   5 -11  -7  130.80   25.98
   5 -11  -8   78.43    7.00
   5 -11  -8   77.40    8.09
   5 -11  -8   91.91   17.87
   5 -11  -9    1.80    2.30
   5 -11  -9    2.57    3.17
   5 -11  -9    1.65    8.27
   5 -11 -10   82.87    8.02
   5 -11 -10   82.95    8.80
  -5  11  11   75.89    8.29
   5 -11 -11   98.17   10.45
   5 -11 -11   83.48   10.31
  -5  11  12    1.03    3.83
   5 -11 -12    2.02    2.86
   5 -11 -12    6.69    4.34
   5 -11 -12    2.42    3.99
  -5  11  13    5.59    4.18
   5 -11 -13   13.13    4.23
   5 -11 -13   14.17    5.35
  -5  11  14   22.48    4.80
   5 -11 -14   26.73    5.46
   5 -11 -14   26.95    6.27
  -5  11  15   29.19    5.39
   5 -11 -15   47.44    8.01
   5 -11 -15   28.85    6.90
   5 -11 -16    2.08    4.45
   5 -11 -16    2.30    4.65
   5 -11 -17   30.00    8.43
   5 -11 -17   22.86    6.26
  -5  12   1   73.96    6.19
  -5  12   1   66.93    7.61
   5 -12  -1   64.82    7.85
   5 -12  -1   65.22    7.28
   5 -12  -1   71.44    8.56
  -5  12   2  138.99   10.30
  -5  12   2  128.38   12.00
   5 -12  -2  133.93   11.59
   5 -12  -2  120.26   10.34
  -5  12   3   18.31    2.98
  -5  12   3   18.92    4.54
   5 -12  -3   21.50    3.78
   5 -12  -3   22.42    4.37
   5 -12  -3   15.22    7.26
  -5  12   4   11.75    2.86
  -5  12   4   13.74    4.49
   5 -12  -4   15.23    3.13
   5 -12  -4   13.72    3.94
   5 -12  -4   11.15    8.70
  -5  12   5  124.20   10.02
  -5  12   5  135.31   12.90
   5 -12  -5  123.38    9.76
   5 -12  -5  111.33   10.20
   5 -12  -5  136.46   21.90
  -5  12   6  134.31   11.00
   5 -12  -6  140.96   11.05
   5 -12  -6  118.26   25.41
  -5  12   7    2.61    2.23
   5 -12  -7    3.85    2.24
   5 -12  -7    4.43    3.65
  -5  12   8   74.80    8.92
   5 -12  -8   75.41    7.09
   5 -12  -8   68.91    8.55
   5 -12  -8   88.39   20.55
  -5  12   9  128.93   12.60
   5 -12  -9  125.85   10.61
   5 -12  -9  111.59   11.48
   5 -12  -9  114.21   16.85
  -5  12  10   28.49    5.85
   5 -12 -10   29.25    4.79
   5 -12 -10   26.49    6.27
   5 -12 -10   33.71    8.92
  -5  12  11    2.63    4.17
   5 -12 -11    6.36    3.28
   5 -12 -11    1.26    4.68
   5 -12 -11    0.79    5.34
  -5  12  12   29.30    5.62
   5 -12 -12   36.54    6.01
   5 -12 -12   37.30    7.29
  -5  12  13   18.99    5.04
   5 -12 -13   31.75    6.06
   5 -12 -13   27.19    6.82
  -5  12  14    6.11    4.42
   5 -12 -14    4.61    4.34
   5 -12 -14    7.19    5.46
   5 -12 -15   13.33    5.86
   5 -12 -15    8.96    5.91
  -5  13   1   58.19    5.49
  -5  13   1   56.59    7.00
   5 -13  -1   50.70    7.81
   5 -13  -1   58.10    7.79
   5 -13  -1   56.06    8.03
  -5  13   2    0.76    2.21
  -5  13   2    3.42    3.50
   5 -13  -2    6.01    3.56
   5 -13  -2    4.41    3.46
   5 -13  -2    2.40    5.58
  -5  13   3   48.75    5.14
   5 -13  -3   48.38    6.09
   5 -13  -3   45.97    6.73
   5 -13  -3   47.01    9.35
  -5  13   4   34.55    4.50
   5 -13  -4   34.92    4.87
   5 -13  -4   42.50    6.70
   5 -13  -4   42.54   11.63
  -5  13   5    3.64    2.43
  -5  13   5    4.78    4.31
   5 -13  -5    3.99    2.71
   5 -13  -5    2.68    3.90
   5 -13  -5   15.28   14.11
  -5  13   6    6.81    2.43
  -5  13   6    9.94    4.94
   5 -13  -6   10.86    3.22
   5 -13  -6   11.51    4.62
   5 -13  -6   12.64   19.29
  -5  13   7  135.23   13.23
   5 -13  -7  126.76   10.35
   5 -13  -7  130.65   13.21
  -5  13   8   91.60    9.54
   5 -13  -8  103.34    9.29
   5 -13  -8   97.72   11.44
   5 -13  -8   97.32   21.60
  -5  13   9    3.48    5.21
   5 -13  -9   -0.39    2.59
   5 -13  -9    1.88    4.53
   5 -13  -9    2.85   10.64
  -5  13  10   34.05    6.66
   5 -13 -10   30.43    5.89
   5 -13 -10   26.38    7.21
   5 -13 -10   38.24   10.99
  -5  13  11   42.20    6.82
   5 -13 -11   46.65    6.59
   5 -13 -11   52.91    9.72
   5 -13 -11   42.30    8.98
  -5  13  12   44.11    7.03
   5 -13 -12   51.11    7.28
   5 -13 -12   44.84    9.35
   5 -13 -12   38.75    7.63
   5 -13 -13   -3.86    4.04
   5 -13 -13    0.39    6.00
   5 -13 -13   -0.40    3.83
  -5  14   1   79.99    7.15
   5 -14  -1  105.82   12.26
  -5  14   2  101.92    8.72
  -5  14   2  103.15   10.68
   5 -14  -2   98.79   10.70
   5 -14  -2   99.59   11.13
  -5  14   3   11.43    3.53
  -5  14   3   10.76    3.92
   5 -14  -3    6.64    3.74
   5 -14  -3   13.23    5.22
   5 -14  -3    5.63    8.13
  -5  14   4    2.56    2.64
   5 -14  -4    5.64    3.44
   5 -14  -4    4.40    4.15
   5 -14  -4   -1.35    9.27
  -5  14   5    5.06    2.03
  -5  14   5   40.45    6.62
   5 -14  -5   42.74    6.22
   5 -14  -5   31.90    6.91
   5 -14  -5   53.48   20.55
  -5  14   6    3.60    1.90
   5 -14  -6   56.64    7.27
   5 -14  -6   51.31    8.88
   5 -14  -6   38.03   20.52
  -5  14   7    0.87    1.56
  -5  14   7   10.80    4.90
   5 -14  -7    7.58    3.51
   5 -14  -7   10.06    5.47
   5 -14  -7   -4.74   20.61
  -5  14   8   12.00    5.12
   5 -14  -8    9.95    3.80
   5 -14  -8   12.53    6.08
   5 -14  -8   -1.87   16.72
  -5  14   9   32.33    6.47
   5 -14  -9   30.16    8.30
   5 -14  -9   36.60   14.34
  -5  14  10   32.12    6.58
   5 -14 -10   38.70    6.59
   5 -14 -10   32.62    8.74
   5 -14 -10   39.72   11.86
  -5  14  11    8.02    5.16
   5 -14 -11    9.94    6.49
  -5  14  12   11.49    5.42
   5 -14 -12    3.94    5.63
   5 -14 -13   30.11    7.16
   5 -15  -1   37.18    8.93
   5 -15  -1   32.36    7.98
   5 -15  -1   49.22    8.53
  -5  15   2    0.15    3.73
   5 -15  -2    0.60    5.05
   5 -15  -2    1.19    6.16
  -5  15   3   13.84    4.48
   5 -15  -3   16.70    5.59
   5 -15  -3    9.56    6.15
   5 -15  -3   20.88    9.24
  -5  15   4   12.55    3.35
   5 -15  -4   61.87    8.94
   5 -15  -4   57.23   10.38
   5 -15  -4   70.79   15.61
   5 -15  -5   43.72    7.07
   5 -15  -5   50.77    9.29
   5 -15  -5   63.17   22.62
   5 -15  -6    1.00    3.91
   5 -15  -6    3.14    4.94
   5 -15  -6    1.56   17.41
   5 -15  -7   29.45   20.92
   5 -15  -8   25.22   16.87
   5 -15  -9    3.45   10.78
   5 -15 -11   25.76    7.69
   5 -16  -1   -1.06    5.58
   5 -16  -2   24.30    8.93
   5 -16  -3   34.57   10.90
   5 -16  -4    0.94   10.46
   5 -16  -5    1.00   10.84
  -4 -17   1   26.89    7.11
   4  17  -1   23.83    5.41
   4  17  -2   22.64    5.42
  -4 -16   1   74.72   10.10
  -4 -16   1   73.44   10.25
   4  16  -1   88.79    9.71
   4  16  -1   67.77    7.53
  -4 -16   2  102.81   12.07
  -4 -16   2  107.96   12.21
   4  16  -2   89.96    9.02
  -4 -16   3    1.37    4.13
  -4 -16   3    8.70    4.87
   4  16  -3    1.95    3.11
  -4 -16   4   21.13    5.68
   4  16  -4   23.84    5.37
  -4 -16   5   33.22    6.32
   4  16  -5   36.77    6.52
  -4 -15   1   26.00    6.06
  -4 -15   1   29.09    6.47
   4  15  -1   27.74    4.91
   4  15  -1   28.75    4.99
  -4 -15   2   27.76    6.23
  -4 -15   2   23.08    5.80
   4  15  -2   30.45    5.48
   4  15  -2   23.89    4.41
  -4 -15   3   82.47   10.02
  -4 -15   3   85.28    9.37
   4  15  -3   97.91   10.10
  -4 -15   4   52.52    8.04
  -4 -15   4   52.77    7.44
   4  15  -4   63.41    8.21
   4  15  -4   48.42    5.99
  -4 -15   5    7.13    4.32
  -4 -15   5    7.25    3.95
   4  15  -5    9.13    4.19
  -4 -15   6   14.73    4.15
   4  15  -6   20.74    5.65
  -4 -15   7   76.84    8.44
   4  15  -7   81.59   10.11
  -4 -14   1  102.33   10.94
  -4 -14   1   85.90    9.75
   4  14  -1  112.43   10.38
   4  14  -1   81.54    8.22
  -4 -14   2  139.84   13.37
   4  14  -2  125.14   11.23
  -4 -14   3   34.73    6.38
  -4 -14   3   37.18    5.97
   4  14  -3   41.67    5.79
   4  14  -3   35.33    5.30
  -4 -14   4    0.05    3.29
   4  14  -4    2.02    2.82
  -4 -14   5   55.80    8.70
  -4 -14   5   64.11    7.37
   4  14  -5   72.44    8.56
  -4 -14   6  106.32   10.04
   4  14  -6  132.68   13.12
   4  14  -7   22.97    5.57
  -4 -14   8   12.12    3.94
   4  14  -8   12.12    4.84
  -4 -14   9   65.71    7.36
  -4 -13   1   91.61    9.52
  -4 -13   1  108.87   11.23
   4  13  -1  102.90    9.83
  -4 -13   2    3.20    2.76
   4  13  -2    7.58    3.62
  -4 -13   3   21.59    4.48
  -4 -13   3   27.96    5.10
   4  13  -3   28.14    4.81
  -4 -13   4   82.48    8.93
  -4 -13   4   82.72    8.75
   4  13  -4   87.10    9.16
   4  13  -4   75.53    7.89
  -4 -13   5   61.94    7.72
   4  13  -5   78.70    8.82
   4  13  -5   78.75    8.42
  -4 -13   6   -0.10    3.07
   4  13  -6    0.51    3.00
  -4 -13   7   76.53    9.20
  -4 -13   7   76.20    7.86
  -4 -13   8   34.99    6.38
  -4 -13   8   41.34    5.68
  -4 -13   9    9.56    4.02
  -4 -13  10   -0.60    3.06
   4  13 -10    3.12    4.31
  -4 -13  11   37.23    5.51
  -4 -12   1   18.83    3.91
   4  12  -1   25.49    4.59
  -4 -12   2   92.79    8.97
   4  12  -2   92.87    8.13
   4  12  -2   93.56    9.14
  -4 -12   3  129.50   12.11
   4  12  -3  110.36    9.20
   4  12  -3  123.32   11.38
  -4 -12   4    3.75    2.82
  -4 -12   4    4.21    3.29
   4  12  -4    2.20    2.04
  -4 -12   5   55.36    6.79
   4  12  -5   57.12    6.50
   4  12  -5   55.12    6.52
  -4 -12   6   69.06    7.82
  -4 -12   6   91.76    9.39
   4  12  -6   76.71    8.29
  -4 -12   7    6.87    3.48
  -4 -12   7   11.22    3.75
   4  12  -7    7.38    3.22
  -4 -12   8    4.79    3.37
  -4 -12   8    3.01    3.60
   4  12  -8    4.81    3.25
  -4 -12   9    2.79    3.52
  -4 -12   9    7.23    3.38
   4  12  -9    8.46    3.73
  -4 -12  10   49.05    7.18
  -4 -12  10   56.72    6.34
   4  12 -10   71.99    9.31
  -4 -12  11   29.88    4.65
   4  12 -11   33.84    7.05
  -4 -12  12    8.29    3.57
  -4 -12  13   29.27    4.81
  -4 -11   1  354.39   24.84
  -4 -11   1  370.89   29.76
   4  11  -1  345.14   23.09
   4  11  -1  352.04   27.18
  -4 -11   2   95.48    8.59
   4  11  -2  104.05    8.69
   4  11  -2  103.73    9.78
  -4 -11   3    2.13    2.09
  -4 -11   3    5.24    3.75
  -4 -11   4  118.10   10.41
  -4 -11   4  124.86   11.44
   4  11  -4  115.28    9.61
   4  11  -4  125.33   11.50
  -4 -11   5   90.74    9.09
   4  11  -5   89.94    8.34
   4  11  -5   84.76    8.46
  -4 -11   6    1.46    2.34
  -4 -11   6    3.04    3.37
   4  11  -6    1.55    2.11
  -4 -11   7    1.76    2.69
  -4 -11   7    1.51    3.09
   4  11  -7    1.85    2.57
  -4 -11   8   48.71    6.49
  -4 -11   8   63.63    6.91
   4  11  -8   54.44    6.72
  -4 -11   9   94.68    8.71
   4  11  -9  114.80   11.33
  -4 -11  10    1.76    2.86
  -4 -11  10    6.75    3.41
   4  11 -10    1.20    2.89
  -4 -11  11   32.06    5.75
  -4 -11  11   41.70    5.44
   4  11 -11   43.05    7.34
  -4 -11  12   32.77    4.81
   4  11 -12   38.76    7.22
  -4 -11  14   -1.75    2.94
  -4 -11  15   30.38    5.49
  -4 -10   1   15.25    3.16
  -4 -10   1   11.46    3.60
   4  10  -1   15.95    2.64
   4  10  -1   11.12    3.13
  -4 -10   2  221.13   16.41
   4  10  -2  214.21   15.13
  -4 -10   3  105.82    9.21
  -4 -10   3  111.72   10.54
   4  10  -3  104.26    8.56
   4  10  -3   99.10    9.20
  -4 -10   4   56.13    6.09
  -4 -10   4   62.88    7.12
   4  10  -4   52.72    5.39
   4  10  -4   59.35    6.79
  -4 -10   5   -0.08    2.13
  -4 -10   5   -0.27    3.22
  -4 -10   6   66.39    7.11
  -4 -10   6   70.82    7.07
   4  10  -6   67.14    6.78
  -4 -10   7  140.65   12.09
   4  10  -7  138.41   11.53
  -4 -10   8   15.15    3.66
  -4 -10   8   20.47    3.83
   4  10  -8   17.03    3.85
  -4 -10   9   39.22    5.88
  -4 -10   9   49.10    5.86
  -4 -10  10   99.23    8.99
   4  10 -10  107.47   10.68
  -4 -10  11   36.85    5.08
   4  10 -11   34.21    6.04
  -4 -10  12    1.67    2.68
  -4 -10  13   10.63    3.38
   4  10 -13    7.45    4.37
  -4 -10  14   53.14    6.14
  -4 -10  15   30.89    4.72
  -4 -10  16    4.48    3.40
  -4  -9   1  276.97   19.98
   4   9  -1  265.75   18.27
   4   9  -1  243.93   18.50
   4   9  -2  271.66   18.79
   4   9  -2  262.62   20.53
  -4  -9   3    1.30    2.86
   4   9  -3    1.53    1.46
   4   9  -3    3.58    2.99
  -4  -9   4  129.02   10.69
  -4  -9   4  144.60   12.66
   4   9  -4  126.27    9.71
  -4  -9   5  143.09   11.47
  -4  -9   5  156.27   13.15
   4   9  -5  153.61   11.89
  -4  -9   6  120.84   10.58
   4   9  -6  114.89    9.46
  -4  -9   7    2.06    2.58
   4   9  -7    1.63    1.99
  -4  -9   8  130.87   11.15
   4   9  -8  137.97   11.73
   4   9  -9  147.04   12.42
  -4  -9  10   19.62    3.92
   4   9 -10   17.06    3.96
  -4  -9  11    9.45    3.23
   4   9 -11    6.30    3.26
  -4  -9  12   40.15    5.16
   4   9 -12   47.04    6.98
  -4  -9  13   68.92    7.20
  -4  -9  14    0.35    2.89
   4   9 -14    3.04    3.45
  -4  -9  15   42.77    5.52
  -4  -9  16   53.99    6.54
  -4  -9  17   20.84    4.40
  -4  -8   1   55.46    6.36
   4   8  -1   47.49    4.30
   4   8  -1   56.30    5.79
  -4  -8   2   11.91    3.45
   4   8  -2   12.34    3.12
  -4  -8   3  331.19   25.60
   4   8  -3  337.33   22.86
   4   8  -3  321.64   24.56
  -4  -8   4  615.99   46.27
   4   8  -4  580.86   37.23
   4   8  -5   70.52    6.24
   4   8  -5   84.00    8.26
  -4  -8   6   18.31    3.34
   4   8  -6   23.06    3.39
  -4  -8   7  202.55   16.20
   4   8  -7  200.40   14.95
  -4  -8   8   76.83    7.31
   4   8  -8   75.22    7.66
  -4  -8   9   -1.49    2.29
   4   8  -9    0.11    1.71
  -4  -8  10   50.44    5.74
   4   8 -10   46.08    5.80
   4   8 -11   89.35    9.03
  -4  -8  12   37.09    4.98
   4   8 -12   41.47    6.12
  -4  -8  13   15.77    3.73
   4   8 -13   13.08    4.24
  -4  -8  15   20.91    4.24
   4   8 -15   19.03    5.41
  -4  -8  16   11.48    3.75
  -4  -8  17    6.13    3.76
  -4  -8  18   47.77    6.66
  -4  -7   1  298.81   22.81
   4   7  -1  323.14   21.65
   4   7  -1  316.32   24.19
  -4  -7   2  303.77   22.68
   4   7  -2  329.48   22.03
   4   7  -2  338.39   26.15
  -4  -7   3  197.76   15.90
   4   7  -3  185.24   12.78
   4   7  -3  198.63   16.02
  -4  -7   4    3.87    2.09
  -4  -7   5  359.32   27.14
   4   7  -5  373.98   25.49
   4   7  -5  342.62   26.39
  -4  -7   6  317.44   24.34
   4   7  -6  309.38   21.10
   4   7  -7    7.86    2.12
  -4  -7   8   42.05    4.89
   4   7  -8   36.46    4.42
  -4  -7   9  115.70   10.08
  -4  -7   9  111.38    9.64
  -4  -7  10  103.04    9.40
  -4  -7  10  121.41   10.71
   4   7 -10  111.42    9.91
  -4  -7  11   -0.49    2.22
  -4  -7  11    1.38    2.66
   4   7 -11    1.97    2.18
  -4  -7  12   71.88    7.47
  -4  -7  12   71.28    6.90
   4   7 -12   77.98    8.43
  -4  -7  13   84.64    8.00
   4   7 -13   86.43    9.30
  -4  -7  14   18.67    3.98
   4   7 -14   18.48    4.61
  -4  -7  15    1.90    3.02
   4   7 -15    0.69    2.79
   4   7 -16   23.69    5.72
  -4  -7  17   29.04    4.61
  -4  -7  18   19.11    4.44
  -4  -6   1  483.33   30.94
  -4  -6   1  474.31   35.05
   4   6  -1  495.09   31.86
   4   6  -1  518.01   39.04
  -4  -6   2  112.57    8.28
  -4  -6   2  125.64   10.66
   4   6  -2  116.34    8.32
   4   6  -2  141.50   11.96
  -4  -6   3  291.01   20.06
  -4  -6   3  277.36   21.00
   4   6  -3  290.06   19.53
   4   6  -3  279.36   21.37
  -4  -6   4  525.74   34.97
  -4  -6   4  492.54   35.94
   4   6  -4  511.90   33.29
  -4  -6   5  241.87   17.37
  -4  -6   5  243.35   19.06
   4   6  -5  212.55   14.33
  -4  -6   6   25.78    3.64
  -4  -6   6   24.95    3.32
   4   6  -6   25.17    3.28
  -4  -6   7  183.32   14.56
   4   6  -7  180.75   13.29
  -4  -6   8  383.03   25.94
  -4  -6   8  378.79   28.08
   4   6  -8  423.29   29.49
  -4  -6   9   79.50    7.32
   4   6  -9   84.32    7.78
  -4  -6  10   98.54    8.72
  -4  -6  10  102.52    9.19
  -4  -6  11  169.67   13.60
  -4  -6  11  172.26   14.38
   4   6 -11  154.94   12.39
  -4  -6  12   75.84    7.42
  -4  -6  12   85.60    8.33
   4   6 -12   76.40    7.92
  -4  -6  13    1.31    2.21
  -4  -6  13    1.44    3.08
   4   6 -13    1.51    2.39
   4   6 -14   38.70    6.01
  -4  -6  15   75.79    7.97
   4   6 -15   67.94    8.35
  -4  -6  16   22.22    4.52
   4   6 -16   19.42    4.98
   4   6 -17   13.73    4.83
  -4  -6  18   53.32    6.64
  -4  -6  19   34.96    5.78
  -4  -5   1   15.76    2.02
  -4  -5   1   12.82    2.59
   4   5  -1   17.04    2.08
   4   5  -1   16.77    2.52
  -4  -5   2  678.79   41.69
  -4  -5   2  717.26   52.54
   4   5  -2  768.06   50.14
   4   5  -2  730.61   53.67
  -4  -5   3  611.92   38.74
   4   5  -3  640.26   41.23
   4   5  -3  638.69   47.43
  -4  -5   4   38.28    3.84
  -4  -5   4   40.27    4.17
   4   5  -4   38.96    3.78
   4   5  -4   35.97    4.02
  -4  -5   5  258.13   17.48
  -4  -5   5  254.84   18.96
   4   5  -5  290.54   20.36
  -4  -5   6  304.82   20.66
  -4  -5   6  284.43   20.83
   4   5  -6  336.28   23.57
  -4  -5   7  484.82   32.56
  -4  -5   7  450.65   32.71
   4   5  -7  480.98   32.13
  -4  -5   8   22.89    3.45
  -4  -5   8   26.44    3.70
   4   5  -8   22.58    3.29
  -4  -5   9  236.78   16.81
  -4  -5   9  234.56   18.08
   4   5  -9  259.69   19.04
  -4  -5  10  148.26   11.69
  -4  -5  10  140.99   11.38
   4   5 -10  150.52   12.13
  -4  -5  11   36.84    4.75
  -4  -5  11   33.09    4.54
  -4  -5  12   23.57    4.14
   4   5 -12   23.40    4.17
  -4  -5  13   96.05    8.82
  -4  -5  13   97.15    9.17
   4   5 -13   95.58    9.41
  -4  -5  14   75.46    7.49
  -4  -5  14   77.19    7.80
   4   5 -15   -0.15    2.29
  -4  -5  16   34.86    5.28
   4   5 -16   37.36    6.53
  -4  -5  17   84.57    8.41
   4   5 -17   99.79   11.41
   4   5 -18    6.41    3.99
  -4  -5  19    8.39    3.83
  -4  -4   1 1279.41   76.87
  -4  -4   1 1455.09  108.47
   4   4  -1 1391.13  101.43
  -4  -4   2  199.35   12.61
  -4  -4   2  243.67   19.09
   4   4  -2  222.92   14.81
   4   4  -2  244.37   18.98
  -4  -4   3  321.78   21.53
  -4  -4   3  310.39   23.06
   4   4  -3  322.32   21.44
   4   4  -3  293.44   21.41
  -4  -4   4  468.54   34.06
   4   4  -4  510.38   33.80
   4   4  -4  467.11   34.87
  -4  -4   5  328.14   21.59
  -4  -4   5  328.43   24.26
   4   4  -5  355.76   24.21
  -4  -4   6   62.99    5.51
   4   4  -6   68.84    6.04
  -4  -4   7  146.71   10.97
  -4  -4   7  145.04   11.57
   4   4  -7  149.13   11.22
  -4  -4   8  664.34   43.35
  -4  -4   8  606.51   43.04
   4   4  -8  717.80   48.46
  -4  -4   9   95.92    8.58
   4   4  -9   85.94    7.47
  -4  -4  10    0.16    1.36
  -4  -4  10    0.35    2.57
   4   4 -10    0.66    1.60
  -4  -4  11  100.51    8.89
  -4  -4  11   81.98    7.32
   4   4 -11   91.78    8.45
  -4  -4  12  176.74   13.83
   4   4 -12  163.23   13.07
  -4  -4  13   45.38    5.52
   4   4 -13   52.82    6.41
  -4  -4  14   30.57    4.28
  -4  -4  14   30.65    4.74
   4   4 -14   33.53    5.34
  -4  -4  15  134.12   12.15
   4   4 -15  127.09   11.98
   4   4 -16   61.50    7.94
  -4  -4  17    1.98    3.63
  -4  -4  18   16.32    4.56
  -4  -3   1   53.52    4.11
   4   3  -1   57.26    4.40
  -4  -3   2  602.68   38.41
  -4  -3   2  600.68   43.98
   4   3  -2  590.14   37.06
   4   3  -2  595.77   43.45
  -4  -3   3  977.13   61.59
  -4  -3   3  941.57   67.07
   4   3  -3 1013.54   74.93
  -4  -3   4  769.89   49.06
   4   3  -4  763.51   48.21
  -4  -3   5    2.92    1.56
   4   3  -5    4.22    1.25
  -4  -3   6 1161.80   75.33
  -4  -3   6  963.00   64.59
   4   3  -6 1284.46   86.41
  -4  -3   7  852.70   54.10
  -4  -3   7  838.75   60.53
   4   3  -7  900.36   58.81
  -4  -3   8   12.29    2.30
  -4  -3   8   15.41    2.84
   4   3  -8   13.85    2.45
  -4  -3   9  283.87   19.73
  -4  -3   9  267.92   20.33
   4   3  -9  285.30   20.17
  -4  -3  10  386.10   28.72
   4   3 -10  421.43   29.33
  -4  -3  11  193.08   14.35
  -4  -3  11  182.45   14.46
   4   3 -11  203.27   15.64
  -4  -3  12   10.88    2.73
  -4  -3  12    5.73    2.86
   4   3 -12    7.59    2.60
   4   3 -13  179.87   14.51
  -4  -3  14  124.96   10.43
  -4  -3  14  117.41   10.35
   4   3 -14  124.26   11.30
  -4  -3  15    5.48    2.47
   4   3 -15    5.44    2.85
  -4  -3  16   24.29    4.99
   4   3 -16   24.48    5.13
   4   3 -17   48.10    7.16
  -4  -3  18   25.76    5.29
   4   3 -18   25.50    5.60
  -4  -3  19    0.07    4.13
   4   3 -19    2.51    3.30
  -4  -2   1  652.91   41.49
   4   2  -1  628.40   38.89
  -4  -2   2  387.36   24.75
  -4  -2   2  416.48   31.35
   4   2  -2  374.35   23.36
   4   2  -2  387.76   28.33
  -4  -2   3   49.29    3.79
  -4  -2   3   62.04    5.19
   4   2  -3   57.40    4.51
  -4  -2   4  406.83   26.67
  -4  -2   4  386.21   27.93
  -4  -2   5 1041.44   68.48
  -4  -2   5  860.33   58.69
   4   2  -5 1021.96   66.35
  -4  -2   6  356.55   25.24
   4   2  -6  428.89   29.40
  -4  -2   7  320.11   21.27
  -4  -2   7  303.80   22.26
   4   2  -7  345.62   23.91
  -4  -2   8  929.00   60.83
  -4  -2   8  779.65   53.67
   4   2  -8  966.55   64.60
  -4  -2   9  410.05   27.29
  -4  -2  10   40.27    4.64
   4   2 -10   40.79    4.76
  -4  -2  11  135.11   10.52
  -4  -2  11  122.64   10.16
   4   2 -11  145.48   11.98
  -4  -2  12  338.26   23.87
  -4  -2  12  282.49   20.82
   4   2 -12  349.39   25.60
  -4  -2  13   44.65    5.01
  -4  -2  13   44.86    5.39
  -4  -2  14   14.53    3.18
   4   2 -14   14.48    3.65
  -4  -2  15   73.02    7.02
   4   2 -15   77.22    8.60
  -4  -2  16   27.80    4.22
  -4  -2  16   37.37    5.60
  -4  -2  17   16.82    4.29
   4   2 -17   13.07    4.09
   4   2 -18   10.16    4.70
   4   2 -18   14.35    5.16
  -4  -2  19   27.23    5.09
   4   2 -19   33.06    6.57
  -4  -2  20   25.95    5.73
  -4  -2  20   21.68    5.25
  -4  -1   1  366.77   23.54
  -4  -1   1  332.74   23.61
   4   1  -1  351.15   21.92
   4   1  -1  396.64   29.81
  -4  -1   2  156.42   10.05
  -4  -1   2  189.14   15.00
   4   1  -2  163.53   10.67
  -4  -1   3 1385.08   87.33
   4   1  -3 1351.47   83.65
  -4  -1   4 1052.51   68.22
  -4  -1   4  980.00   70.18
   4   1  -4  970.77   60.00
  -4  -1   5   15.38    1.96
  -4  -1   5   11.48    1.70
  -4  -1   6  689.20   43.64
  -4  -1   6  653.37   46.35
   4   1  -6  754.57   50.05
  -4  -1   7  744.60   52.64
   4   1  -7  858.16   56.71
  -4  -1   8   77.51    6.48
  -4  -1   8   65.24    5.64
   4   1  -8   75.98    6.56
  -4  -1   9   55.40    4.97
  -4  -1   9   54.96    5.25
   4   1  -9   60.08    5.77
  -4  -1  10  524.37   34.44
  -4  -1  11  356.63   25.27
  -4  -1  11  268.68   19.24
   4   1 -11  344.83   24.96
  -4  -1  12   17.61    2.75
  -4  -1  12   16.81    3.04
   4   1 -12   16.49    3.31
  -4  -1  13  111.21    9.14
  -4  -1  13   90.41    7.91
   4   1 -13  113.95   10.51
  -4  -1  14  118.62    9.69
  -4  -1  14  104.49    9.33
   4   1 -14  126.56   11.62
  -4  -1  15   31.54    4.21
   4   1 -15   27.85    4.92
  -4  -1  16    0.03    1.74
  -4  -1  16   -1.74    2.99
   4   1 -16    1.19    2.23
  -4  -1  17   31.49    4.92
   4   1 -17   27.53    5.45
   4   1 -17   32.88    6.14
  -4  -1  18   73.13    8.06
  -4  -1  18   65.20    8.62
   4   1 -18   70.93    8.75
   4   1 -18   86.03   10.49
  -4  -1  19    4.02    3.91
  -4  -1  19    2.81    4.08
   4   1 -19    4.65    3.77
   4   1 -19   -2.05    4.26
  -4  -1  20    7.14    4.13
  -4  -1  20    4.69    4.55
   4   1 -20    3.22    4.00
  -4   0   1  517.25   32.26
   4   0  -1  526.43   33.02
   4   0  -2 1699.87  105.51
   4   0  -3  551.41   34.79
  -4   0   4  983.72   62.90
  -4   0   4  887.86   62.08
  -4   0   4  914.88   65.64
   4   0  -4 1022.90   66.58
  -4   0   5 1282.71   80.89
  -4   0   5 1220.55   87.04
   4   0  -5 1292.70   81.96
  -4   0   6  612.43   39.41
  -4   0   6  559.22   40.04
   4   0  -6  639.78   42.13
  -4   0   7   21.10    2.43
   4   0  -7   20.05    2.63
  -4   0   8  186.38   12.73
   4   0  -8  198.44   14.29
  -4   0   9 1226.12   77.98
   4   0  -9 1201.55   76.05
  -4   0  10  221.31   15.35
  -4   0  11   81.81    6.75
   4   0 -11   83.61    7.70
  -4   0  12  332.15   21.94
   4   0 -12  373.83   26.88
  -4   0  13  128.01   10.08
   4   0 -13  117.95   10.30
  -4   0  14    7.76    2.18
   4   0 -15    7.35    3.07
  -4   0  16  136.34   11.35
  -4   0  16  111.58   10.18
  -4   0  16  110.18   11.42
   4   0 -16  137.77   12.99
   4   0 -16  132.43   12.09
  -4   0  17   45.94    5.56
  -4   0  17   39.40    5.19
   4   0 -17   44.38    6.76
   4   0 -17   46.44    6.72
  -4   0  18    0.50    3.22
  -4   0  18    2.01    4.54
   4   0 -18    2.30    2.93
   4   0 -18   -0.77    3.76
  -4   0  19   33.82    5.47
  -4   0  19   38.79    7.69
   4   0 -19   39.21    7.25
  -4   0  20   24.51    4.81
  -4   0  20   26.98    7.48
   4   0 -20   26.37    6.47
  -4   1   1  920.61   57.32
  -4   1   2  154.31   10.02
   4  -1  -2  153.16    9.92
   4  -1  -3 1402.98   87.31
  -4   1   4  200.04   13.03
   4  -1  -4  202.77   13.38
  -4   1   5  186.45   11.97
  -4   1   5  224.10   19.19
   4  -1  -5  190.62   12.65
  -4   1   6  139.61   10.08
  -4   1   6  102.66    8.34
   4  -1  -6  133.70    9.87
  -4   1   7  857.00   54.20
  -4   1   8  313.57   23.02
   4  -1  -8  386.97   26.97
  -4   1   9   33.50    3.43
  -4   1   9   24.36    3.51
   4  -1  -9   33.20    3.88
  -4   1  10  364.10   25.29
  -4   1  10  275.79   20.17
   4  -1 -10  360.28   25.66
  -4   1  11  379.70   25.14
  -4   1  11  324.00   23.81
   4  -1 -11  491.78   36.89
  -4   1  12   55.88    5.11
  -4   1  12   56.75    6.78
   4  -1 -12   57.93    6.23
   4  -1 -12   56.94    5.72
  -4   1  13   12.99    2.47
   4  -1 -13   13.30    3.17
   4  -1 -13    9.48    2.63
  -4   1  14   81.67    7.11
  -4   1  14   70.00    8.29
   4  -1 -14  102.33   10.21
   4  -1 -14   86.68    8.13
  -4   1  15  168.67   12.74
   4  -1 -15  183.57   15.55
   4  -1 -15  172.93   13.61
  -4   1  16   12.13    2.91
  -4   1  16   11.13    5.00
   4  -1 -16   15.00    4.15
   4  -1 -16   12.17    3.61
  -4   1  17   54.64    6.26
  -4   1  17   50.02    8.73
   4  -1 -17   54.71    7.69
   4  -1 -17   61.84    7.47
  -4   1  18   46.27    5.98
  -4   1  18   42.91    8.76
   4  -1 -18   55.62    7.87
  -4   1  19    5.56    3.64
  -4   1  19    7.19    6.78
   4  -1 -19    4.00    3.50
   4  -1 -19    6.41    4.41
  -4   1  20    8.48    8.61
   4  -1 -20    1.49    3.67
  -4   2   1  959.69   60.80
   4  -2  -1  916.80   56.34
   4  -2  -1  905.42   55.37
   4  -2  -1  951.66   69.14
  -4   2   2 1440.30   92.58
  -4   2   2 1258.67   89.27
  -4   2   3   49.22    3.46
  -4   2   3   49.55    3.93
  -4   2   4   10.69    1.22
   4  -2  -4   10.66    1.36
   4  -2  -4    8.69    1.07
  -4   2   5  543.21   35.26
  -4   2   5  510.07   36.84
   4  -2  -5  535.65   34.71
   4  -2  -5  490.39   30.71
  -4   2   6  755.04   48.26
   4  -2  -6  773.36   50.27
   4  -2  -6  696.31   43.46
  -4   2   7   77.86    5.82
   4  -2  -7   77.50    6.17
   4  -2  -7   78.25    5.89
  -4   2   8  372.34   24.82
  -4   2   8  328.60   27.02
   4  -2  -8  369.84   25.07
   4  -2  -8  348.31   22.85
  -4   2   9  345.80   22.98
  -4   2   9  300.88   24.40
   4  -2  -9  366.67   25.51
   4  -2  -9  342.99   22.96
  -4   2  10  151.68   11.01
  -4   2  10  134.14   13.14
   4  -2 -10  155.68   12.08
   4  -2 -10  144.57   10.37
  -4   2  11    6.03    1.65
  -4   2  11    2.44    4.85
   4  -2 -11    5.69    2.24
   4  -2 -11    4.56    1.68
  -4   2  12  156.21   11.44
  -4   2  12  147.63   14.79
   4  -2 -12  163.12   13.10
   4  -2 -12  166.64   12.51
  -4   2  13  330.28   22.53
  -4   2  13  297.21   24.92
   4  -2 -13  363.34   26.72
   4  -2 -13  346.85   24.28
  -4   2  14  113.12    9.00
  -4   2  14  100.36   12.47
   4  -2 -14  138.23   12.52
   4  -2 -14  130.44   10.78
  -4   2  15   25.89    3.81
  -4   2  15   21.25    8.11
   4  -2 -15   21.45    4.51
   4  -2 -15   20.45    3.96
  -4   2  16  180.66   14.13
  -4   2  16  155.68   17.16
   4  -2 -16  192.58   16.49
   4  -2 -16  195.53   15.58
  -4   2  17   35.61    5.08
  -4   2  17   38.09   10.58
   4  -2 -17   42.71    6.63
   4  -2 -17   35.15    5.33
   4  -2 -18    2.69    2.93
   4  -2 -18    3.33    3.48
  -4   2  19   12.71   11.49
   4  -2 -19   14.32    4.84
   4  -2 -19   11.91    4.53
  -4   2  20    9.62    3.64
  -4   2  20   20.86   13.66
   4  -2 -20   12.87    4.93
   4  -2 -20    9.73    4.72
   4  -2 -21   13.12    5.40
   4  -3  -1  579.98   42.12
  -4   3   2   40.28    3.00
  -4   3   2   39.73    3.61
   4  -3  -2   38.25    2.47
  -4   3   3  257.62   17.15
  -4   3   3  234.90   17.15
   4  -3  -3  251.59   16.43
   4  -3  -3  251.45   16.14
   4  -3  -3  211.32   17.15
  -4   3   4 1149.99   76.67
  -4   3   4  997.86   71.73
   4  -3  -4  997.86   61.95
   4  -3  -4 1058.84   67.56
   4  -3  -4  894.25   61.58
  -4   3   5  161.12   11.05
  -4   3   5  148.60   11.01
   4  -3  -5  153.49   10.32
   4  -3  -5  160.76   10.65
   4  -3  -5  148.13   11.45
  -4   3   6  112.96    8.19
  -4   3   6  103.92    8.41
   4  -3  -6  102.95    7.39
   4  -3  -6  100.05    6.64
  -4   3   7  582.96   37.69
  -4   3   7  593.88   45.03
   4  -3  -7  539.31   33.16
  -4   3   8  503.03   32.81
   4  -3  -8  498.26   32.66
   4  -3  -8  476.07   29.90
  -4   3   9   82.02    6.41
  -4   3   9   94.88   14.12
   4  -3  -9   89.71    7.41
   4  -3  -9   84.51    6.26
  -4   3  10   82.40    6.60
  -4   3  10   92.47   13.79
   4  -3 -10   87.09    7.57
   4  -3 -10   82.19    6.29
  -4   3  11  341.19   22.67
  -4   3  11  357.19   33.85
   4  -3 -11  368.68   26.12
   4  -3 -11  333.22   21.62
  -4   3  12  247.84   16.65
  -4   3  12  257.84   27.00
   4  -3 -12  290.79   21.61
   4  -3 -12  277.08   19.21
  -4   3  13   16.11   13.01
   4  -3 -13   14.54    3.37
  -4   3  14  180.26   13.15
  -4   3  14  216.41   28.94
   4  -3 -14  201.43   16.33
   4  -3 -14  195.07   14.32
  -4   3  15  203.62   15.26
  -4   3  15  219.89   28.83
   4  -3 -15  206.94   15.19
  -4   3  16   18.38   16.01
   4  -3 -16   16.30    4.23
  -4   3  17   15.08    3.69
  -4   3  17   28.28   19.95
   4  -3 -17   10.12    3.97
   4  -3 -17   14.24    3.70
  -4   3  18   10.82    3.93
  -4   3  18   17.69   21.68
   4  -3 -18   11.33    4.12
   4  -3 -18    7.97    3.68
  -4   3  19   73.02   24.57
   4  -3 -19   67.02    8.99
   4  -3 -19   67.85    8.09
  -4   3  20    8.20   19.76
   4  -3 -20   -1.14    3.68
   4  -3 -20    0.52    3.82
   4  -3 -21    4.60    4.21
  -4   4   1  571.65   39.64
  -4   4   1  502.89   37.35
   4  -4  -1  471.04   28.56
   4  -4  -1  474.09   28.70
  -4   4   2  454.89   33.86
   4  -4  -2  454.53   28.94
   4  -4  -2  442.18   27.58
   4  -4  -2  421.62   30.41
  -4   4   3  630.27   40.49
  -4   4   3  613.19   44.62
   4  -4  -3  602.71   37.39
   4  -4  -3  606.90   37.37
   4  -4  -3  643.97   49.04
  -4   4   4   52.38    4.66
   4  -4  -4   45.22    3.31
   4  -4  -4   55.98    9.71
  -4   4   5  474.21   31.12
  -4   4   5  472.01   34.88
   4  -4  -5  479.31   31.19
   4  -4  -5  453.30   28.14
   4  -4  -5  426.53   31.46
  -4   4   6  950.15   61.64
  -4   4   6  927.93   67.85
   4  -4  -6  945.45   60.76
   4  -4  -6  893.56   55.29
   4  -4  -6  843.01   59.87
  -4   4   7  116.90    8.52
  -4   4   7  120.34    9.73
   4  -4  -7  129.01    8.81
  -4   4   8   57.80    5.13
  -4   4   8   59.50    6.02
   4  -4  -8   56.67    4.97
   4  -4  -8   54.79    4.09
  -4   4   9  280.78   21.86
   4  -4  -9  314.81   21.81
  -4   4  10  312.09   20.63
  -4   4  10  307.73   24.89
   4  -4 -10  353.57   24.82
   4  -4 -10  340.11   22.53
  -4   4  11   36.28    3.94
  -4   4  11   36.04    8.45
   4  -4 -11   46.14    5.14
   4  -4 -11   44.21    4.02
  -4   4  12   86.20    7.37
  -4   4  12  104.23   16.34
   4  -4 -12   92.04    8.36
   4  -4 -12   91.24    7.08
  -4   4  13  227.07   25.36
   4  -4 -13  296.50   22.63
  -4   4  14   82.35    7.40
  -4   4  14   86.79   18.36
   4  -4 -14  101.51    9.96
   4  -4 -14   98.02    8.04
  -4   4  15   -0.66    1.86
  -4   4  15   -3.39   13.65
   4  -4 -15    0.95    2.45
   4  -4 -15   -0.63    1.90
  -4   4  16   19.28    4.13
  -4   4  16   26.04   17.00
   4  -4 -16   18.29    4.46
   4  -4 -16   17.21    3.29
  -4   4  17   56.36    7.53
  -4   4  17   36.09   20.53
   4  -4 -17   47.04    7.04
   4  -4 -17   55.66    6.20
  -4   4  18   77.01    9.21
  -4   4  18   58.60   22.82
   4  -4 -18   67.11    9.37
   4  -4 -18   76.27    7.75
  -4   4  19   -7.01   16.76
   4  -4 -19   -1.66    2.95
   4  -4 -19    0.90    3.03
  -4   4  20   17.00   18.48
   4  -4 -20   26.62    5.75
   4  -4 -21   13.79    5.72
  -4   5   1  432.59   27.06
  -4   5   1  418.70   30.80
   4  -5  -1  410.40   25.19
   4  -5  -1  442.58   28.23
   4  -5  -1  453.47   34.05
  -4   5   2   84.42    5.69
  -4   5   2   75.56    6.38
   4  -5  -2   80.54    5.40
   4  -5  -2   81.77    5.57
   4  -5  -2   79.26    7.05
  -4   5   3   71.91    6.21
   4  -5  -3   71.31    4.86
   4  -5  -3   67.27    4.44
   4  -5  -3   89.12    9.07
   4  -5  -4  750.66   48.16
   4  -5  -4  713.51   44.28
   4  -5  -4  691.96   53.58
  -4   5   5  816.04   52.19
   4  -5  -5  811.21   51.17
   4  -5  -5  796.86   49.30
  -4   5   6    2.42    1.44
  -4   5   6    3.07    1.58
   4  -5  -6    3.47    1.06
   4  -5  -6    4.14    0.85
   4  -5  -6    6.03    3.59
  -4   5   7  344.74   23.71
  -4   5   7  329.57   24.54
   4  -5  -7  375.60   26.15
   4  -5  -7  326.71   20.45
   4  -5  -7  299.55   22.24
  -4   5   8  522.94   34.49
  -4   5   8  503.21   36.59
   4  -5  -8  545.77   36.10
   4  -5  -8  530.71   33.63
  -4   5   9  196.97   15.43
   4  -5  -9  214.84   15.39
  -4   5  10    1.60    1.62
  -4   5  10   -0.28    2.95
   4  -5 -10    0.68    1.37
   4  -5 -10   -0.73    0.95
  -4   5  11  243.46   17.47
  -4   5  11  239.66   19.89
   4  -5 -11  270.97   19.93
   4  -5 -11  238.88   15.56
  -4   5  12  246.15   18.07
  -4   5  12  227.23   19.74
   4  -5 -12  263.96   19.78
   4  -5 -12  242.05   16.13
  -4   5  13   -0.36    1.86
   4  -5 -13    2.96    2.37
   4  -5 -13    0.88    1.52
  -4   5  14   49.15    5.95
   4  -5 -14   51.00    6.31
   4  -5 -14   51.88    4.88
  -4   5  15   90.06    9.07
  -4   5  15   87.90   14.57
   4  -5 -15   97.51   10.00
   4  -5 -15   88.19    7.29
  -4   5  16   78.53    8.80
  -4   5  16   66.26   14.37
   4  -5 -16   83.29    9.35
   4  -5 -16   81.57    7.17
  -4   5  17   11.69    4.07
  -4   5  17   10.85   12.87
   4  -5 -17   15.07    4.62
   4  -5 -17   14.14    3.34
  -4   5  18   31.43    6.12
  -4   5  18   24.98   14.18
   4  -5 -18   33.51    5.05
  -4   5  19   15.54   14.34
   4  -5 -19   16.53    5.17
   4  -5 -19   15.55    4.25
  -4   5  20   18.77   13.91
   4  -5 -20   10.34    4.75
   4  -5 -21   -2.86    3.82
  -4   6   1    4.38    0.64
  -4   6   1    7.09    2.54
   4  -6  -1    5.48    1.34
   4  -6  -1    4.01    0.90
   4  -6  -1    8.38    2.39
  -4   6   2  303.27   19.74
  -4   6   2  247.79   17.70
   4  -6  -2  291.36   19.02
   4  -6  -2  306.35   20.28
  -4   6   3  915.57   57.55
  -4   6   3  881.29   63.37
   4  -6  -3  936.09   59.49
  -4   6   4   79.42    5.93
  -4   6   4   71.23    6.27
   4  -6  -4   67.10    4.74
   4  -6  -4   66.41    4.66
   4  -6  -4   64.81    9.28
  -4   6   5  214.57   15.57
   4  -6  -5  241.60   15.95
   4  -6  -5  241.76   15.74
   4  -6  -5  274.66   28.57
  -4   6   6  361.16   24.43
  -4   6   6  320.87   23.09
   4  -6  -6  369.82   24.68
   4  -6  -6  337.74   21.11
   4  -6  -6  357.38   31.27
  -4   6   7   86.69    7.12
  -4   6   7   78.24    6.44
   4  -6  -7   94.39    6.69
  -4   6   8    4.82    2.02
  -4   6   8    7.21    2.22
   4  -6  -8    5.61    1.61
   4  -6  -8    6.85    1.24
  -4   6   9   49.49    5.30
   4  -6  -9   55.17    5.18
  -4   6  10  288.54   21.04
  -4   6  10  293.28   22.84
   4  -6 -10  306.24   21.57
   4  -6 -10  286.56   18.34
  -4   6  11  126.23   11.12
  -4   6  11  116.85   10.33
   4  -6 -11  134.94   11.00
   4  -6 -11  125.27    8.72
  -4   6  12   16.06    3.89
   4  -6 -12   18.29    3.69
   4  -6 -12   16.17    2.29
  -4   6  13   58.86    7.41
  -4   6  13   61.78    8.09
   4  -6 -13   62.03    6.85
   4  -6 -13   55.71    4.85
  -4   6  14   85.67    9.06
  -4   6  14   81.41    9.95
   4  -6 -14   96.95    9.53
   4  -6 -14   90.30    7.17
  -4   6  15   34.80    5.79
  -4   6  15   26.60    7.18
   4  -6 -15   40.24    5.99
   4  -6 -15   37.95    4.16
  -4   6  16    5.63    3.54
  -4   6  16   -0.53    6.44
   4  -6 -16    2.52    2.92
   4  -6 -16    0.72    2.08
  -4   6  17   84.53   10.39
  -4   6  17   68.23   11.41
   4  -6 -17   75.86    9.27
   4  -6 -17   72.31    6.85
   4  -6 -18   32.15    4.73
  -4   6  19   -3.28    8.41
   4  -6 -19    2.51    3.78
   4  -6 -20    8.30    4.05
   4  -6 -21    2.51    3.81
  -4   7   1  867.62   54.70
   4  -7  -1  767.88   45.82
   4  -7  -1  846.91   53.20
   4  -7  -1  967.45   74.28
  -4   7   2  389.16   25.04
  -4   7   2  373.67   28.40
   4  -7  -2  343.31   21.29
   4  -7  -2  394.01   25.97
   4  -7  -2  368.91   27.99
  -4   7   3   66.21    4.59
  -4   7   3   74.73    7.28
   4  -7  -3   66.45    5.04
   4  -7  -3   64.98    4.95
  -4   7   4  418.49   26.90
  -4   7   4  398.52   29.50
   4  -7  -4  425.90   27.71
   4  -7  -4  410.32   26.21
   4  -7  -4  410.44   33.43
  -4   7   5  113.83    8.27
   4  -7  -5  105.71    7.49
   4  -7  -5  100.21    6.97
   4  -7  -5   97.41   15.13
  -4   7   6    5.84    2.36
   4  -7  -6    5.24    1.30
   4  -7  -6    4.18    1.30
   4  -7  -6    4.05   10.53
  -4   7   7   24.35    3.26
   4  -7  -7   30.80    3.00
   4  -7  -7   24.13    7.08
  -4   7   8  104.12    8.19
  -4   7   8  103.74    8.77
   4  -7  -8  113.90    8.79
   4  -7  -8  111.43    7.98
   4  -7  -8   94.20    9.75
  -4   7   9  163.80   12.93
   4  -7  -9  187.80   13.84
   4  -7  -9  168.70   14.57
  -4   7  10    2.64    2.40
   4  -7 -10    0.93    1.60
   4  -7 -10    1.40    1.20
  -4   7  11  101.29    9.56
  -4   7  11   99.47    9.05
   4  -7 -11  120.26   10.28
   4  -7 -11  106.29    7.65
  -4   7  12   40.79    6.33
  -4   7  12   42.72    5.63
   4  -7 -12   46.57    5.59
   4  -7 -12   41.88    3.81
   4  -7 -13   79.70    7.91
  -4   7  14   23.10    5.74
  -4   7  14   18.14    4.76
   4  -7 -14   22.01    4.40
   4  -7 -14   20.98    3.07
  -4   7  15   44.52    7.66
  -4   7  15   44.80    6.91
   4  -7 -15   43.69    6.29
   4  -7 -15   38.46    4.17
  -4   7  16  160.51   16.98
  -4   7  16  102.86   10.44
   4  -7 -16  130.79   12.60
   4  -7 -16  142.49   11.18
  -4   7  17   21.65    6.58
  -4   7  17   20.78    6.60
   4  -7 -17   25.22    5.49
   4  -7 -17   24.24    3.91
  -4   7  18    6.89    5.37
  -4   7  18    1.68    6.24
   4  -7 -18   -0.86    2.76
  -4   7  19   28.13    7.66
   4  -7 -19   32.14    6.71
   4  -7 -19   28.38    5.29
   4  -7 -20   21.07    5.07
   4  -7 -21    7.20    4.89
  -4   8   1   15.96    1.64
  -4   8   1   15.47    3.34
   4  -8  -1   12.66    2.15
   4  -8  -1   15.12    2.24
   4  -8  -1   13.06    2.92
  -4   8   2  398.82   25.13
  -4   8   2  396.88   30.29
   4  -8  -2  390.51   25.66
   4  -8  -2  383.55   24.47
   4  -8  -2  431.44   33.79
  -4   8   3  358.45   23.52
  -4   8   3  336.38   25.90
   4  -8  -3  312.39   19.78
   4  -8  -3  338.55   22.17
   4  -8  -3  349.58   28.19
  -4   8   4   58.35    4.52
  -4   8   4   58.31    6.23
   4  -8  -4   52.76    4.36
   4  -8  -4   54.29    4.65
   4  -8  -4   51.53    8.53
  -4   8   5   52.72    4.29
  -4   8   5   58.22    6.03
   4  -8  -5   48.15   11.22
  -4   8   6  213.51   16.72
   4  -8  -6  219.71   14.99
  -4   8   7  268.72   20.00
   4  -8  -7  307.67   20.88
   4  -8  -7  299.90   20.12
   4  -8  -7  298.86   29.23
  -4   8   8   73.47    6.55
   4  -8  -8   87.87    7.12
   4  -8  -8   80.97    6.32
   4  -8  -8   94.88   12.21
  -4   8   9   84.24    7.63
   4  -8  -9   91.13    7.50
   4  -8  -9   92.11    7.13
   4  -8  -9   85.15    9.65
  -4   8  10  224.40   17.47
  -4   8  10  180.72   14.17
   4  -8 -10  200.59   14.74
   4  -8 -10  198.93   13.70
   4  -8 -10  182.19   15.69
  -4   8  11  104.53    9.58
  -4   8  11   79.95    7.26
   4  -8 -11  103.50    9.13
   4  -8 -11   98.27    7.51
  -4   8  12   92.31    9.56
  -4   8  12   79.72    7.80
   4  -8 -12   89.57    8.45
   4  -8 -12   81.93    6.44
  -4   8  13    1.63    3.45
   4  -8 -13    3.98    2.62
  -4   8  14  187.18   17.93
  -4   8  14  140.29   12.35
   4  -8 -14  145.79   12.56
   4  -8 -14  135.07    9.74
  -4   8  15  180.03   19.69
  -4   8  15  114.40   10.56
   4  -8 -15  141.80   13.05
   4  -8 -15  128.78    9.71
  -4   8  16    4.66    4.96
  -4   8  16    5.91    4.36
   4  -8 -16    3.79    3.17
   4  -8 -16    2.57    2.34
  -4   8  17   78.84   12.29
   4  -8 -17   61.19    8.06
   4  -8 -17   63.49    6.35
  -4   8  18   78.19   12.96
  -4   8  18   51.12    6.92
   4  -8 -18   59.57    6.87
  -4   8  19    9.47    5.34
   4  -8 -19   19.83    5.93
   4  -8 -19   17.05    4.58
   4  -8 -20    0.55    3.75
   4  -8 -21   34.62    8.37
  -4   9   1  306.17   20.07
  -4   9   1  303.62   24.18
   4  -9  -1  288.34   19.43
   4  -9  -1  278.20   18.29
  -4   9   2  195.04   12.89
  -4   9   2  199.78   16.78
   4  -9  -2  177.02   12.74
   4  -9  -2  181.10   12.59
   4  -9  -2  194.81   16.60
  -4   9   3   12.23    1.67
  -4   9   3   12.99    4.04
   4  -9  -3    8.76    2.14
   4  -9  -3   11.78    2.36
   4  -9  -3    9.71    4.88
  -4   9   4  140.00    9.67
   4  -9  -4  135.59    9.95
   4  -9  -4  124.78    9.00
   4  -9  -4  154.86   16.22
  -4   9   5  291.88   22.65
   4  -9  -5  301.55   20.65
   4  -9  -5  278.71   27.27
  -4   9   6  187.32   13.78
   4  -9  -6  166.10   11.75
   4  -9  -6  154.34   10.92
   4  -9  -6  136.62   21.12
  -4   9   7   -0.93    1.71
  -4   9   7   19.00    3.77
   4  -9  -7    0.87    1.30
   4  -9  -7    1.28    1.80
  -4   9   8  141.02   11.48
   4  -9  -8  164.13   12.16
   4  -9  -8  150.98   17.77
  -4   9   9  128.64   11.23
   4  -9  -9  126.50    9.69
   4  -9  -9  119.43    9.12
   4  -9  -9  123.50   13.67
  -4   9  10   24.21    4.01
   4  -9 -10   25.55    3.66
   4  -9 -10   20.51    3.26
   4  -9 -10   25.59    5.86
  -4   9  11    2.40    2.69
   4  -9 -11    0.94    1.93
   4  -9 -11    2.13    2.14
   4  -9 -11    4.99    3.62
  -4   9  12   62.04    7.78
  -4   9  12   74.68    7.76
   4  -9 -12   68.98    6.99
   4  -9 -12   65.62    6.00
  -4   9  13  166.12   13.52
   4  -9 -13  197.66   16.03
   4  -9 -13  190.55   14.28
  -4   9  14   37.40    6.69
  -4   9  14   24.40    4.77
   4  -9 -14   32.46    5.48
   4  -9 -14   30.43    4.39
  -4   9  15   43.77    7.88
  -4   9  15   29.37    5.15
   4  -9 -15   24.05    4.12
  -4   9  16   89.96   12.97
  -4   9  16   66.56    7.70
   4  -9 -16   80.60    9.40
   4  -9 -16   57.60    6.60
  -4   9  17   73.23   11.83
  -4   9  17   44.47    6.47
   4  -9 -17   50.03    7.55
   4  -9 -17   41.78    5.51
  -4   9  18    9.38    6.09
  -4   9  18    8.74    4.03
   4  -9 -18    9.84    4.53
   4  -9 -18    6.57    3.72
   4  -9 -19   15.68    5.31
   4  -9 -19   13.29    4.60
   4  -9 -20   42.68    8.54
   4  -9 -20   36.96    6.84
  -4  10   1   43.02    3.73
  -4  10   1   45.30    5.93
   4 -10  -1   33.15    3.85
   4 -10  -1   39.34    4.44
   4 -10  -1   39.36    5.57
  -4  10   2   34.44    3.13
  -4  10   2   48.73    6.55
   4 -10  -2   28.86    4.11
   4 -10  -2   29.71    3.76
   4 -10  -2   41.14    6.31
  -4  10   3  230.53   15.56
  -4  10   3  224.08   18.48
   4 -10  -3  199.27   14.12
   4 -10  -3  226.13   16.31
  -4  10   4  227.27   15.65
  -4  10   4  209.45   17.29
   4 -10  -4  192.92   13.34
   4 -10  -4  212.67   15.47
   4 -10  -4  205.98   19.72
  -4  10   5   48.26    4.32
  -4  10   5   64.32    7.16
   4 -10  -5   41.63    4.13
   4 -10  -5   45.75    4.98
  -4  10   6   15.56    2.71
  -4  10   6   15.73    3.97
   4 -10  -6   13.11    2.32
   4 -10  -6   12.59    2.80
  -4  10   7  140.59   10.98
   4 -10  -7  126.76    9.36
  -4  10   8   55.01    5.87
  -4  10   8   50.46    5.99
   4 -10  -8   46.90    4.60
   4 -10  -8   39.10    4.54
   4 -10  -8   43.07   13.92
  -4  10   9   -1.19    2.94
   4 -10  -9    0.30    1.65
   4 -10  -9    2.20    2.30
   4 -10  -9    1.12    7.58
  -4  10  10   15.03    3.76
   4 -10 -10   18.06    3.21
   4 -10 -10   16.08    3.62
   4 -10 -10   15.25    6.14
  -4  10  11  112.91   10.48
   4 -10 -11  109.86    9.37
  -4  10  12  126.03   11.40
   4 -10 -12  128.94   11.05
   4 -10 -12  135.72   11.38
   4 -10 -12  116.84   11.92
   4 -10 -13    3.45    2.60
   4 -10 -13    0.60    2.99
  -4  10  14  100.42    9.78
   4 -10 -14  111.57   10.91
   4 -10 -14   94.41    8.73
  -4  10  15   56.54    6.58
   4 -10 -15   57.63    7.63
   4 -10 -15   59.32    7.04
   4 -10 -16   18.93    5.09
  -4  10  17    4.51    4.56
  -4  10  17    2.75    3.44
   4 -10 -17   -1.72    3.15
   4 -10 -17   -1.43    3.62
   4 -10 -18   37.32    7.63
   4 -10 -18   35.53    6.53
   4 -10 -19   38.76    7.80
   4 -10 -19   32.58    6.58
  -4  11   1   31.77    3.33
  -4  11   1   29.46    5.03
   4 -11  -1   18.35    3.39
   4 -11  -1   31.68    5.18
  -4  11   2  125.78    8.78
  -4  11   2  125.80   11.33
   4 -11  -2  130.33   12.58
  -4  11   3  139.96    9.96
  -4  11   3  144.94   13.29
   4 -11  -3  127.80   10.80
   4 -11  -3  117.08    9.42
   4 -11  -3  142.18   14.44
  -4  11   4   -0.60    1.51
  -4  11   4   -3.23    3.59
   4 -11  -4   -1.17    1.87
   4 -11  -4    0.47    2.19
   4 -11  -4    1.72    6.23
  -4  11   5  170.27   12.29
  -4  11   5  161.93   14.26
   4 -11  -5  150.71   11.18
  -4  11   6  161.32   12.32
   4 -11  -6  138.62   10.22
   4 -11  -6  146.40   12.04
   4 -11  -6  138.93   23.02
  -4  11   7    9.80    3.05
   4 -11  -7    9.41    2.33
   4 -11  -7    7.57    3.07
   4 -11  -7   28.69   17.71
  -4  11   8   17.58    3.56
   4 -11  -8   20.09    3.23
   4 -11  -8   17.02    3.80
   4 -11  -8    9.93   13.91
  -4  11   9   92.40    9.06
  -4  11   9   84.94    8.62
   4 -11  -9   87.40    7.53
   4 -11  -9   81.75    7.97
   4 -11  -9   90.57   15.05
  -4  11  10  128.02   10.86
   4 -11 -10  164.34   13.99
   4 -11 -10  158.07   17.31
  -4  11  11   22.26    4.62
   4 -11 -11   23.46    3.99
   4 -11 -11   22.83    4.88
   4 -11 -11   26.10    6.54
  -4  11  12   84.13    8.61
   4 -11 -12   86.22    8.45
   4 -11 -12   81.49    9.84
  -4  11  13   88.09    8.41
   4 -11 -13  108.52   10.33
   4 -11 -13  106.25   10.58
  -4  11  14   42.93    5.71
   4 -11 -14   54.95    7.13
   4 -11 -14   53.42    7.44
  -4  11  15    6.22    3.61
   4 -11 -15    4.59    3.42
   4 -11 -15    7.98    4.46
  -4  11  16   11.19    3.89
   4 -11 -16   11.41    4.42
   4 -11 -16   12.20    4.92
  -4  11  17   44.54    5.91
   4 -11 -17   56.23    8.70
   4 -11 -17   43.79    7.52
   4 -11 -18   13.64    5.80
   4 -11 -19    9.72    5.68
   4 -11 -19    2.51    4.78
  -4  12   1  111.66    8.33
  -4  12   1  120.89   11.69
   4 -12  -1  105.39    9.58
   4 -12  -1  109.73    9.98
  -4  12   2   27.11    3.23
  -4  12   2   28.15    5.13
   4 -12  -2   19.99    4.53
   4 -12  -2   23.78    4.49
  -4  12   3   66.95    5.58
  -4  12   3   75.03    8.60
   4 -12  -3   57.70    6.99
   4 -12  -3   63.45    7.02
   4 -12  -3   76.08   10.68
  -4  12   4  253.02   17.95
  -4  12   4  226.77   19.01
   4 -12  -4  210.80   15.54
   4 -12  -4  219.22   16.71
   4 -12  -4  235.39   22.98
  -4  12   5   77.94    6.55
  -4  12   5   79.29    8.84
   4 -12  -5   73.09   14.42
  -4  12   6    4.14    2.45
  -4  12   6    4.84    4.17
   4 -12  -6    4.08    2.30
   4 -12  -6    2.97    3.02
   4 -12  -6   12.72   15.02
  -4  12   7   60.68    6.29
  -4  12   7   57.10    6.79
   4 -12  -7   60.32    6.00
   4 -12  -7   56.94    7.06
  -4  12   8  140.56   11.89
  -4  12   8  123.97   11.32
   4 -12  -8  133.17   10.65
   4 -12  -8  122.49   11.22
  -4  12   9   45.08    5.96
  -4  12   9   47.20    6.22
   4 -12  -9   49.47    5.56
   4 -12  -9   47.81    6.86
   4 -12  -9   52.70   14.72
  -4  12  10   15.71    4.66
   4 -12 -10   19.55    3.66
   4 -12 -10   16.03    4.58
   4 -12 -10   20.51    9.24
  -4  12  11  104.84    9.89
   4 -12 -11  121.83   10.56
   4 -12 -11  117.56   11.97
   4 -12 -11  120.57   14.42
  -4  12  12   19.62    4.22
   4 -12 -12   28.10    4.84
   4 -12 -12   30.10    6.67
  -4  12  13    4.66    3.67
   4 -12 -13    4.06    2.89
   4 -12 -13    3.76    4.38
   4 -12 -13    1.65    3.97
  -4  12  14   11.13    4.29
   4 -12 -14   12.15    5.17
  -4  12  15   41.76    6.04
   4 -12 -15   45.93    7.40
   4 -12 -16   49.07    8.13
   4 -12 -16   43.93    7.90
   4 -12 -17    3.91    5.00
   4 -12 -17    4.03    4.89
   4 -12 -18   18.40    7.55
   4 -12 -18   10.95    5.97
  -4  13   1    1.17    1.93
  -4  13   1    2.55    3.47
   4 -13  -1    3.51    3.32
   4 -13  -1    1.71    3.00
   4 -13  -1    3.88    4.48
  -4  13   2  126.06    9.42
  -4  13   2  133.50   13.06
   4 -13  -2  118.94   11.78
   4 -13  -2  121.26   11.35
   4 -13  -2  127.93   13.25
  -4  13   3  107.83    8.40
   4 -13  -3   99.74   10.39
   4 -13  -3  110.83   10.90
   4 -13  -3  105.43   12.52
  -4  13   4   -0.86    2.10
  -4  13   4   -0.65    3.79
   4 -13  -4    0.57    2.55
   4 -13  -4   -0.19    3.17
   4 -13  -4   -3.13    7.36
  -4  13   5   45.85    5.01
  -4  13   5   41.59    6.38
   4 -13  -5   40.81    5.51
   4 -13  -5   40.81    6.39
   4 -13  -5   49.92   14.00
  -4  13   6   90.15    8.10
   4 -13  -6   74.16    7.11
   4 -13  -6   89.37    9.94
   4 -13  -6   85.05   22.38
  -4  13   7  112.64   10.00
  -4  13   7   99.86   10.20
   4 -13  -7  102.59    8.96
   4 -13  -7  100.30   10.77
  -4  13   8   -0.70    3.95
   4 -13  -8    5.71    4.31
   4 -13  -8   12.76   18.80
  -4  13   9   60.91    7.60
  -4  13   9   57.99    7.38
   4 -13  -9   63.74    6.74
   4 -13  -9   54.38    8.48
   4 -13  -9   75.27   16.96
  -4  13  10   72.85    8.51
   4 -13 -10   75.73    7.65
   4 -13 -10   58.41    9.05
   4 -13 -10   72.68   14.33
  -4  13  11    5.55    4.10
   4 -13 -11    7.50    3.32
   4 -13 -11   11.56    5.71
   4 -13 -11   11.15    6.97
   4 -13 -12    1.88    3.02
   4 -13 -12   -5.60    5.10
   4 -13 -12   -2.23    5.09
  -4  13  13   53.53    6.83
   4 -13 -13   75.21    9.02
   4 -13 -13   81.36   11.30
   4 -13 -13   55.83    8.56
  -4  13  14   52.68    6.63
   4 -13 -14   75.24    9.42
   4 -13 -14   75.74   11.06
  -4  13  15    6.50    3.88
   4 -13 -15    9.96    4.86
   4 -13 -15   14.38    6.40
   4 -13 -16   16.46    7.02
   4 -13 -16   14.33    6.07
  -4  14   1  106.18    8.49
  -4  14   1  118.86   11.72
   4 -14  -1  114.79   12.32
   4 -14  -1  103.56   11.09
  -4  14   2   46.33    6.40
   4 -14  -2   31.15    7.23
   4 -14  -2   39.71    7.01
   4 -14  -2   44.84    8.29
  -4  14   3   12.70    4.17
   4 -14  -3   13.35    4.82
   4 -14  -3   10.36    6.74
  -4  14   4   65.00    7.47
   4 -14  -4   74.50    9.69
   4 -14  -4   77.19   14.20
  -4  14   5   54.07    7.36
   4 -14  -5   44.88    7.77
   4 -14  -5   47.18   15.43
  -4  14   6   20.44    5.19
   4 -14  -6   15.10    4.09
   4 -14  -6   15.77    5.53
   4 -14  -6   19.80   18.22
  -4  14   7   20.60    4.77
   4 -14  -7   23.74    4.57
   4 -14  -7   19.55    6.23
  -4  14   8  100.36   10.33
  -4  14   8   83.59    9.28
   4 -14  -8  102.45    9.72
   4 -14  -8   93.86   12.08
   4 -14  -8   84.70   25.13
  -4  14   9   44.38    7.01
  -4  14   9   41.85    6.64
   4 -14  -9   54.25    6.80
   4 -14  -9   46.22   17.04
  -4  14  10    0.11    3.07
  -4  14  10   -0.08    4.20
   4 -14 -10   -0.95    2.72
   4 -14 -10    5.43    5.32
   4 -14 -10   -2.66    9.60
  -4  14  11   12.26    4.55
   4 -14 -11   17.00    4.52
   4 -14 -11   12.97    6.83
   4 -14 -11   16.63    8.19
  -4  14  12   67.17    7.80
   4 -14 -12   95.12   10.36
   4 -14 -12   81.41   12.63
   4 -14 -12   91.14   12.65
  -4  14  13   22.89    4.75
   4 -14 -13   42.69    7.41
   4 -14 -13   49.02   10.61
  -4  14  14   -0.44    4.21
   4 -14 -14   -2.20    4.54
   4 -14 -14    0.66    3.99
  -4  15   1    1.45    2.67
   4 -15  -1    0.94    4.90
   4 -15  -1    5.19    4.91
   4 -15  -1   -2.96    4.99
  -4  15   2   60.74    6.32
   4 -15  -2   64.90   10.77
   4 -15  -2   70.17   10.53
  -4  15   3   85.14    8.01
   4 -15  -3   74.79   10.58
   4 -15  -3   76.96   12.13
  -4  15   4   34.34    5.15
   4 -15  -4   31.63    6.53
   4 -15  -4   26.52    7.07
   4 -15  -4   35.67   11.02
  -4  15   5    0.25    3.12
   4 -15  -5    0.38    3.49
   4 -15  -5   -0.05    4.57
   4 -15  -5  -10.90   11.90
  -4  15   6   77.75    8.40
   4 -15  -6   96.17   10.33
   4 -15  -6   76.97   22.06
  -4  15   7   72.66    8.83
   4 -15  -7   77.22    8.82
  -4  15   8    6.53    4.01
   4 -15  -8   13.38    4.36
   4 -15  -8    6.76    6.20
   4 -15  -8    3.74   16.70
  -4  15   9    0.66    2.13
   4 -15  -9    3.62    3.70
   4 -15  -9   -0.81    5.90
   4 -15  -9   -3.57   12.77
  -4  15  10    4.04    2.91
   4 -15 -10   33.07    6.28
   4 -15 -10   37.78    9.97
   4 -15 -10   30.67   11.63
   4 -15 -11   61.21    8.87
   4 -15 -11   50.74   11.16
   4 -15 -11   45.62   10.09
   4 -15 -12    1.91    5.06
   4 -15 -13   21.76    6.24
   4 -15 -14   45.60    8.31
  -4  16   1   31.98    5.55
   4 -16  -1   26.02    8.96
   4 -16  -1   29.22    9.11
   4 -16  -1   31.24    7.35
  -4  16   2   20.81    4.96
   4 -16  -2   29.38    8.93
   4 -16  -2   26.06    8.22
   4 -16  -2   19.78    7.33
  -4  16   3    9.33    3.88
   4 -16  -3    5.43    6.00
   4 -16  -3    5.39    6.20
   4 -16  -3    6.42    7.51
  -4  16   4    1.80    4.05
   4 -16  -4    8.95    5.44
   4 -16  -4    6.77    6.08
   4 -16  -5   78.99   10.89
   4 -16  -5   64.84   11.24
   4 -16  -6   39.73    7.68
   4 -16  -6   36.96    9.55
   4 -16  -6   25.06   17.02
   4 -16  -7    2.02    4.68
   4 -16  -7    0.85    5.99
   4 -16  -7    3.68   17.75
   4 -16  -8   41.34   18.99
   4 -16  -9   45.15   14.23
   4 -16 -12   33.09    8.16
   4 -17  -4   30.50   10.95
   4 -17  -5    7.62    9.92
   4 -17  -6    8.75   10.09
   4 -17  -7   31.49   12.52
   3  18  -1    2.31    3.25
  -3 -17   1   25.58    7.82
  -3 -17   1   27.48    6.69
   3  17  -1   22.64    5.28
   3  17  -2   44.29    6.68
   3  17  -3   19.62    5.00
  -3 -16   1   61.95    9.29
   3  16  -1   63.78    8.05
   3  16  -1   57.41    6.71
  -3 -16   2    0.00    3.90
  -3 -16   2    5.44    4.69
   3  16  -2    1.74    3.37
   3  16  -2    3.41    3.09
  -3 -16   3   44.44    8.35
  -3 -16   3   43.91    6.82
  -3 -16   4   28.40    8.90
  -3 -16   4   39.65    6.22
   3  16  -4   41.48    6.92
  -3 -16   5   17.69    4.34
   3  16  -5   15.22    5.38
   3  16  -6    2.51    3.84
  -3 -15   1    2.35    3.30
  -3 -15   1    3.90    4.58
   3  15  -1    4.75    3.37
   3  15  -1    6.53    3.70
  -3 -15   2  102.04   11.04
  -3 -15   2  102.08   10.47
   3  15  -2  125.81   11.89
   3  15  -2   96.23    9.25
  -3 -15   3   50.86    8.04
  -3 -15   3   57.74    7.39
   3  15  -3   61.59    7.59
   3  15  -3   60.98    6.99
  -3 -15   4    0.06    3.08
   3  15  -4   -2.06    3.45
   3  15  -4    0.95    2.78
  -3 -15   5   19.52    5.91
  -3 -15   5   15.69    4.34
   3  15  -5   11.86    4.63
  -3 -15   6   46.12    8.45
  -3 -15   6   48.22    6.29
   3  15  -6   51.04    8.00
  -3 -15   7   43.79    5.94
   3  15  -7   40.38    7.44
  -3 -14   1  120.73   11.84
  -3 -14   1  112.45   11.17
   3  14  -1  125.48   10.94
   3  14  -1  113.73   10.56
  -3 -14   2    9.35    3.81
   3  14  -2    4.59    3.10
   3  14  -2    4.79    3.21
  -3 -14   3   17.56    4.53
  -3 -14   3   20.17    4.63
   3  14  -3   16.09    4.71
   3  14  -3   20.94    4.33
  -3 -14   4   71.65    8.59
   3  14  -4   86.09    9.14
  -3 -14   5   95.74    9.38
   3  14  -5  100.33   10.18
  -3 -14   6    7.48    4.25
  -3 -14   6   12.94    4.03
   3  14  -6   13.51    4.39
  -3 -14   7   40.15    7.21
  -3 -14   8  105.24    9.87
   3  14  -8  107.67   11.90
  -3 -14   9   31.94    5.17
   3  14  -9   33.32    7.06
  -3 -13   1    0.11    2.98
  -3 -13   1    0.16    3.53
   3  13  -1    3.13    2.37
   3  13  -1    2.45    3.50
  -3 -13   2   34.66    5.37
   3  13  -2   30.27    4.52
   3  13  -2   34.16    5.19
  -3 -13   3   39.63    5.78
   3  13  -3   42.74    5.37
   3  13  -3   38.72    5.48
   3  13  -4   54.41    6.41
   3  13  -4   50.04    6.12
  -3 -13   5    0.10    3.06
   3  13  -5    0.68    2.45
   3  13  -5    3.90    2.72
  -3 -13   6   57.97    7.67
  -3 -13   6   85.49    8.73
   3  13  -6   90.64    9.67
  -3 -13   7   63.24    8.21
  -3 -13   7   81.59    8.25
   3  13  -7   99.61   10.74
  -3 -13   8    4.87    3.37
  -3 -13   8    3.59    3.36
   3  13  -8    4.40    3.34
  -3 -13   9    0.22    3.59
  -3 -13   9    3.71    3.04
   3  13  -9    6.01    3.91
  -3 -13  10   47.24    5.63
   3  13 -10   47.78    8.11
  -3 -13  11   85.79    8.37
  -3 -12   1  136.82   11.61
   3  12  -1  146.14   11.54
   3  12  -1  123.51   10.80
  -3 -12   2  158.73   13.10
  -3 -12   2  165.10   14.49
   3  12  -2  162.60   14.02
  -3 -12   3   19.29    3.96
  -3 -12   3   24.42    4.70
   3  12  -3   22.62    3.74
   3  12  -3   24.88    4.46
  -3 -12   4   43.82    5.82
   3  12  -4   43.01    5.31
  -3 -12   5  159.87   13.41
  -3 -12   5  164.29   13.94
   3  12  -5  181.63   14.79
   3  12  -5  151.26   13.34
  -3 -12   6   45.92    6.28
  -3 -12   6   59.08    6.77
   3  12  -6   54.63    6.62
  -3 -12   7    2.63    2.69
  -3 -12   7    7.13    3.20
  -3 -12   8   27.81    5.31
  -3 -12   8   35.45    4.84
   3  12  -8   34.82    5.81
  -3 -12   9   82.40    9.39
  -3 -12   9   82.96    7.82
   3  12  -9  102.21   10.97
  -3 -12  10   39.73    6.48
  -3 -12  10   44.48    5.44
   3  12 -10   38.03    7.13
  -3 -12  11   15.94    3.64
   3  12 -11   22.11    5.70
  -3 -12  12  120.62   10.52
   3  12 -12  140.02   14.79
  -3 -12  13   52.79    6.13
  -3 -11   1  141.38   11.25
  -3 -11   1  157.26   13.99
   3  11  -1  147.60   11.04
   3  11  -1  153.66   13.22
  -3 -11   2    1.49    2.12
  -3 -11   2    3.73    3.42
   3  11  -2    2.96    1.73
   3  11  -2    2.24    3.17
  -3 -11   3  145.06   11.45
  -3 -11   3  155.24   13.08
   3  11  -3  173.82   13.45
   3  11  -3  180.62   15.55
  -3 -11   4  182.01   13.97
  -3 -11   4  216.90   18.37
   3  11  -4  201.63   16.82
  -3 -11   5    3.23    2.62
  -3 -11   5    4.11    3.01
   3  11  -5    4.44    2.39
   3  11  -5    4.81    2.98
  -3 -11   6   90.68    8.42
   3  11  -6   93.56    8.73
  -3 -11   7  133.00   11.57
  -3 -11   7  144.54   12.30
   3  11  -7  146.03   12.43
  -3 -11   8   93.25    9.28
  -3 -11   8  105.26    9.54
   3  11  -8  106.07   10.19
  -3 -11   9    2.83    3.23
  -3 -11   9    2.47    2.89
   3  11  -9    0.97    2.73
  -3 -11  10  130.23   12.05
  -3 -11  10  139.55   12.04
   3  11 -10  150.85   13.95
  -3 -11  11  112.21   10.76
  -3 -11  11  125.07   10.93
   3  11 -11  136.64   13.60
  -3 -11  12    5.85    3.55
  -3 -11  12    2.06    2.63
   3  11 -12    1.32    3.36
   3  11 -13   13.12    5.12
  -3 -11  14   59.05    6.50
  -3 -11  15   29.53    4.81
  -3 -10   1  203.16   15.11
  -3 -10   1  196.25   16.39
   3  10  -1  201.69   14.41
   3  10  -1  188.09   15.12
  -3 -10   2  527.97   40.26
   3  10  -2  506.13   32.92
  -3 -10   3  124.99    9.98
  -3 -10   3  144.57   12.77
   3  10  -3  139.41   10.80
   3  10  -3  134.36   11.76
  -3 -10   4    3.91    2.34
  -3 -10   4    5.90    3.08
   3  10  -4    7.20    2.25
   3  10  -4    4.02    2.84
  -3 -10   5   96.03    8.62
  -3 -10   5  101.98    9.31
   3  10  -5  100.75    8.66
   3  10  -5   95.16    9.02
  -3 -10   6  131.18   11.07
  -3 -10   6  137.39   11.78
  -3 -10   7   62.41    6.77
   3  10  -7   73.64    7.55
  -3 -10   8   41.25    5.63
  -3 -10   8   48.84    5.54
   3  10  -8   48.36    5.94
  -3 -10   9  271.02   20.46
  -3 -10   9  264.96   20.56
   3  10  -9  285.38   21.67
  -3 -10  10   74.06    7.92
  -3 -10  10   92.30    8.83
   3  10 -10   79.14    9.14
  -3 -10  11   38.39    4.98
   3  10 -11   42.70    6.44
  -3 -10  12   99.22    9.84
  -3 -10  12  105.25    9.61
   3  10 -12  113.77   11.89
  -3 -10  13   37.41    5.85
  -3 -10  13   46.09    5.50
   3  10 -13   41.34    7.19
  -3 -10  14   19.91    3.95
   3  10 -14   17.83    5.70
  -3 -10  15    6.77    3.08
  -3 -10  16   60.79    6.69
  -3  -9   1  189.91   13.96
   3   9  -1  179.92   14.29
  -3  -9   2    1.85    1.73
   3   9  -2    2.85    1.50
   3   9  -2    1.71    2.79
  -3  -9   3  133.47   10.64
  -3  -9   3  131.19   11.37
   3   9  -3  128.66    9.81
   3   9  -3  124.61   10.89
  -3  -9   4  327.82   25.68
   3   9  -4  300.26   20.19
   3   9  -4  308.34   24.10
  -3  -9   5  211.24   15.55
  -3  -9   5  226.96   18.26
   3   9  -5  207.40   14.73
  -3  -9   6    5.04    2.35
  -3  -9   6    7.37    2.69
   3   9  -6    5.77    2.15
  -3  -9   7  269.81   19.33
  -3  -9   7  284.69   22.25
   3   9  -7  279.89   20.10
  -3  -9   8  281.75   20.03
  -3  -9   8  308.51   24.00
   3   9  -8  317.13   23.13
  -3  -9   9    3.81    2.95
   3   9  -9    7.27    2.79
  -3  -9  10   86.53    8.59
  -3  -9  10   93.71    8.70
   3   9 -10   89.81    8.85
  -3  -9  11  141.22   11.96
  -3  -9  11  158.86   13.51
  -3  -9  12   27.47    4.34
   3   9 -12   26.15    4.99
  -3  -9  13    1.09    2.52
   3   9 -13    0.65    3.01
  -3  -9  14   56.18    7.11
  -3  -9  14   70.16    7.24
   3   9 -14   78.35    9.75
  -3  -9  15   79.90    7.98
   3   9 -15   74.71    9.75
  -3  -9  16   20.32    4.23
  -3  -9  17    9.89    3.67
  -3  -8   1  452.04   30.18
  -3  -8   1  442.64   33.68
   3   8  -1  425.97   27.36
   3   8  -1  428.32   31.90
  -3  -8   2  358.37   23.38
  -3  -8   2  406.26   31.61
   3   8  -2  380.46   25.18
   3   8  -2  370.23   27.97
  -3  -8   3  232.86   16.02
  -3  -8   3  256.17   20.20
   3   8  -3  250.60   19.87
  -3  -8   4   30.31    3.86
  -3  -8   4   40.08    4.88
   3   8  -4   32.11    3.58
   3   8  -4   40.68    5.01
  -3  -8   5  133.15   10.57
   3   8  -5  137.11   10.54
   3   8  -5  131.71   11.40
  -3  -8   6  430.32   29.28
  -3  -8   6  430.05   32.27
   3   8  -6  433.92   29.11
  -3  -8   7  114.45    9.61
  -3  -8   7  125.95   10.77
   3   8  -7  110.80    9.02
  -3  -8   8   81.20    7.75
  -3  -8   8   89.01    8.12
   3   8  -8   89.11    8.05
  -3  -8   9  180.54   14.31
  -3  -8   9  182.36   14.74
   3   8  -9  183.13   14.24
  -3  -8  10  104.63    9.60
   3   8 -10   84.01    7.97
  -3  -8  11   13.98    3.53
   3   8 -11   16.54    3.65
  -3  -8  12   26.05    4.83
  -3  -8  12   25.24    3.99
  -3  -8  13  205.01   17.05
   3   8 -13  180.31   15.08
  -3  -8  14   66.34    7.03
   3   8 -14   69.91    8.60
  -3  -8  15   11.20    3.66
   3   8 -15   11.52    4.76
  -3  -8  16   49.39    6.08
   3   8 -16   38.82    7.28
  -3  -8  18   14.99    3.82
  -3  -7   1  524.96   34.45
  -3  -7   1  470.48   33.72
   3   7  -1  543.38   35.81
  -3  -7   2    2.36    1.48
  -3  -7   2    2.36    2.03
   3   7  -2    2.00    1.14
   3   7  -2    3.01    2.32
  -3  -7   3  320.34   21.47
  -3  -7   3  323.14   24.37
   3   7  -3  333.36   22.32
   3   7  -3  328.17   25.22
  -3  -7   4  766.18   50.30
   3   7  -4  715.50   44.99
   3   7  -4  734.79   54.46
  -3  -7   5  395.04   29.64
   3   7  -5  395.21   30.68
  -3  -7   6   15.89    2.99
   3   7  -6    7.73    1.94
   3   7  -7  224.14   16.02
  -3  -7   8  144.26   11.51
   3   7  -8  158.84   12.38
  -3  -7   9   89.26    8.21
   3   7  -9   85.02    7.72
  -3  -7  10   16.75    3.40
   3   7 -10   15.28    3.15
  -3  -7  11  145.19   12.34
   3   7 -11  143.68   12.01
  -3  -7  12  181.18   15.19
   3   7 -12  165.85   13.66
  -3  -7  13    7.46    3.33
  -3  -7  14   68.55    7.22
   3   7 -14   73.74    8.58
  -3  -7  15  163.41   13.97
   3   7 -15  163.81   14.97
  -3  -7  16   21.68    4.58
   3   7 -16   20.87    5.12
  -3  -7  17   -0.47    3.28
   3   7 -17   -2.21    3.51
  -3  -7  18   18.09    4.29
  -3  -7  19   64.09    7.47
  -3  -6   1  100.35    8.72
   3   6  -1   96.34    7.13
   3   6  -1   89.97    7.31
  -3  -6   2  206.17   15.39
   3   6  -2  235.53   16.12
   3   6  -2  234.71   18.43
  -3  -6   3  520.46   37.33
   3   6  -3  553.99   35.57
   3   6  -3  593.06   45.21
   3   6  -4   69.49    5.80
  -3  -6   5  218.80   16.96
   3   6  -5  227.31   16.11
   3   6  -5  200.05   16.10
  -3  -6   6  621.77   45.75
  -3  -6   7  128.09   10.88
   3   6  -7  112.41    8.75
  -3  -6   8   51.89    5.53
   3   6  -8   40.72    4.47
   3   6  -9  147.86   11.55
  -3  -6  10  405.12   31.09
   3   6 -10  379.70   25.87
  -3  -6  11   94.99    8.81
   3   6 -11   90.77    8.34
  -3  -6  12   38.35    5.08
   3   6 -12   32.67    4.63
  -3  -6  13  101.48    9.19
  -3  -6  13  108.34    9.82
   3   6 -13  116.41   10.95
  -3  -6  14   49.75    6.26
  -3  -6  14   59.71    6.75
   3   6 -14   53.81    7.09
  -3  -6  15    8.42    3.53
   3   6 -15    6.53    3.51
   3   6 -16   21.04    5.18
   3   6 -17   91.51   10.51
  -3  -6  18   30.04    5.10
  -3  -6  19   -0.43    3.27
  -3  -6  20   25.30    5.12
  -3  -5   1  386.25   25.21
  -3  -5   1  366.40   27.01
   3   5  -1  389.32   25.32
   3   5  -1  372.90   27.47
  -3  -5   2  325.21   21.37
  -3  -5   2  312.62   23.06
   3   5  -2  317.16   20.45
   3   5  -2  340.73   26.01
  -3  -5   3   16.31    2.11
   3   5  -3   17.05    2.15
   3   5  -3   19.29    3.00
  -3  -5   4  567.22   36.66
   3   5  -4  566.49   36.24
   3   5  -4  575.14   42.99
  -3  -5   5  449.30   32.37
   3   5  -5  498.69   33.22
  -3  -5   6   29.65    3.67
   3   5  -6   25.72    3.09
  -3  -5   7    2.59    2.02
   3   5  -7    5.57    1.89
  -3  -5   8  291.24   22.33
   3   5  -8  287.76   19.90
  -3  -5   9  241.74   18.92
   3   5  -9  238.98   17.08
  -3  -5  10    7.90    2.27
  -3  -5  10    7.61    2.80
   3   5 -10    8.10    2.34
  -3  -5  11   86.80    7.81
  -3  -5  11   89.55    8.25
   3   5 -11   93.60    8.54
  -3  -5  12  231.26   17.33
  -3  -5  12  222.56   17.91
   3   5 -12  212.73   15.96
  -3  -5  13   46.88    5.45
  -3  -5  13   49.41    6.04
   3   5 -13   49.20    6.00
  -3  -5  14    8.52    2.79
  -3  -5  14   10.10    3.80
   3   5 -14   10.93    3.45
   3   5 -15   71.18    8.25
  -3  -5  16   67.39    7.61
   3   5 -16   57.74    7.58
  -3  -5  17    9.28    3.73
   3   5 -18   62.72    8.63
  -3  -5  19   49.76    6.52
  -3  -5  20    5.11    4.12
  -3  -4   1  313.31   19.70
  -3  -4   1  369.14   28.58
   3   4  -1  295.17   17.76
   3   4  -1  378.11   29.25
  -3  -4   2  256.28   16.62
  -3  -4   2  261.05   19.45
   3   4  -2  275.14   20.98
  -3  -4   3  727.10   44.98
  -3  -4   3  737.99   53.03
   3   4  -3  838.68   55.52
   3   4  -3  740.37   53.54
  -3  -4   4  159.40   10.86
  -3  -4   4  168.19   12.94
   3   4  -4  161.04   10.99
   3   4  -4  183.67   14.95
  -3  -4   5  295.76   19.61
   3   4  -5  313.51   21.09
  -3  -4   6  523.66   32.66
  -3  -4   6  552.81   40.49
   3   4  -6  622.72   42.10
  -3  -4   7  617.12   39.95
   3   4  -7  623.83   40.48
  -3  -4   8   88.42    7.17
  -3  -4   8   95.57    8.48
  -3  -4   9   74.96    6.59
  -3  -4   9   73.95    7.00
   3   4  -9   72.27    6.54
  -3  -4  10  299.03   20.14
  -3  -4  10  312.24   23.90
   3   4 -10  344.13   24.62
  -3  -4  11  105.75    8.75
   3   4 -11  106.77    9.21
  -3  -4  12    0.98    1.73
  -3  -4  12    1.24    2.50
   3   4 -12    1.00    1.90
  -3  -4  13   96.76    8.53
  -3  -4  13  115.04   10.61
   3   4 -13   83.44    7.93
  -3  -4  14   89.33    8.02
  -3  -4  14   93.34    8.68
   3   4 -14   99.30    9.71
  -3  -4  15   17.90    3.33
  -3  -4  15   23.52    4.23
   3   4 -15   26.05    4.80
   3   4 -16   17.80    4.55
  -3  -4  17   67.27    7.83
   3   4 -17   62.62    8.10
  -3  -4  18   56.93    7.06
   3   4 -18   59.55    8.29
  -3  -4  19   -1.78    3.83
   3   4 -19   -1.14    2.73
  -3  -3   1 1918.98  119.51
  -3  -3   1 2016.61  148.58
   3   3  -1 1823.42  109.70
  -3  -3   2  880.76   54.07
  -3  -3   2  910.76   65.73
   3   3  -2  927.27   58.50
   3   3  -2  950.35   70.05
  -3  -3   3    1.20    0.73
  -3  -3   3    1.07    1.17
   3   3  -3    1.13    0.70
   3   3  -3    0.54    1.22
  -3  -3   4  600.21   37.92
  -3  -3   4  610.32   44.57
   3   3  -4  620.94   39.81
  -3  -3   5  417.77   27.05
  -3  -3   5  425.07   31.49
   3   3  -5  421.24   27.27
  -3  -3   6  205.72   15.84
   3   3  -6  204.99   14.15
  -3  -3   7   18.73    2.49
   3   3  -7   21.98    2.84
  -3  -3   8  711.43   45.67
  -3  -3   8  669.64   48.14
   3   3  -8  753.72   50.02
  -3  -3   9  488.21   32.31
  -3  -3   9  474.28   35.32
  -3  -3  10    3.52    1.71
  -3  -3  10    1.39    2.25
   3   3 -10    2.77    1.66
  -3  -3  11  213.63   15.83
  -3  -3  11  181.58   14.12
   3   3 -11  207.99   15.73
  -3  -3  12  121.60    9.91
  -3  -3  12  101.85    8.72
   3   3 -12  119.48   10.39
  -3  -3  13   62.74    6.22
  -3  -3  13   54.76    5.90
  -3  -3  14    0.19    2.77
   3   3 -14    0.77    2.03
  -3  -3  15   62.98    6.41
  -3  -3  15   61.30    6.90
   3   3 -15   61.82    7.23
  -3  -3  16   96.86    8.72
  -3  -3  16   90.69    9.02
  -3  -3  17    0.44    3.32
   3   3 -17    0.71    2.80
  -3  -3  18    0.80    3.53
   3   3 -18    0.96    3.04
  -3  -3  19   16.62    4.55
   3   3 -19   15.45    4.81
  -3  -3  20   30.89    5.31
  -3  -3  21    8.17    4.71
  -3  -2   1  214.04   13.98
  -3  -2   1  215.96   16.26
   3   2  -1  207.78   13.29
   3   2  -1  203.30   14.70
  -3  -2   2  719.07   45.71
  -3  -2   2  690.57   49.42
   3   2  -2  727.19   46.32
   3   2  -2  682.08   48.87
  -3  -2   3 1180.23   73.67
  -3  -2   3 1190.32   86.13
   3   2  -3 1179.69   73.58
  -3  -2   4  389.13   25.33
   3   2  -4  376.20   24.06
  -3  -2   5   12.05    1.68
  -3  -2   5   13.55    2.05
   3   2  -5   11.99    1.70
  -3  -2   6  135.24    9.65
  -3  -2   6  126.40    9.84
   3   2  -6  143.14   10.49
  -3  -2   7  836.85   51.10
  -3  -2   7  860.19   62.10
   3   2  -7  998.09   66.81
  -3  -2   8  138.62    9.79
   3   2  -8  158.64   11.96
  -3  -2   9  141.08   10.37
  -3  -2   9  132.15   10.58
   3   2  -9  154.01   11.89
  -3  -2  10  172.81   12.58
  -3  -2  10  154.35   12.02
   3   2 -10  187.14   14.34
  -3  -2  11   94.50    7.82
  -3  -2  11   85.97    7.57
   3   2 -11   97.04    8.59
  -3  -2  12   32.94    3.86
  -3  -2  12   30.88    4.02
   3   2 -12   31.96    4.33
  -3  -2  13   15.41    2.87
  -3  -2  13   11.26    2.88
   3   2 -13   11.80    3.02
  -3  -2  14  173.15   13.28
  -3  -2  14  153.75   12.83
   3   2 -14  171.29   14.14
  -3  -2  15   84.44    7.55
  -3  -2  15   83.08    8.31
   3   2 -15   88.42    8.97
  -3  -2  16   -1.48    2.68
   3   2 -16   -0.05    2.02
  -3  -2  17   15.58    3.95
   3   2 -17    9.90    3.77
  -3  -2  18   31.11    5.13
   3   2 -18   31.95    5.74
   3   2 -18   34.52    6.39
  -3  -2  19   14.73    4.22
   3   2 -19   16.02    5.33
   3   2 -19   13.79    5.57
  -3  -2  20   -0.07    3.80
   3   2 -20    1.39    3.71
  -3  -2  21   35.61    5.92
  -3  -1   1  973.05   60.96
  -3  -1   1  994.15   72.90
   3   1  -1  930.03   56.55
   3   1  -1  974.76   70.44
  -3  -1   2 2121.84  132.12
   3   1  -2 2094.65  129.42
  -3  -1   3  616.14   38.49
   3   1  -3  640.16   40.71
  -3  -1   4   93.85    6.68
  -3  -1   4   88.44    6.78
   3   1  -4   99.79    7.23
  -3  -1   5  843.38   53.67
  -3  -1   5  809.35   58.33
   3   1  -5  833.79   52.76
  -3  -1   6  315.77   20.43
  -3  -1   6  318.78   23.93
   3   1  -6  331.09   22.02
  -3  -1   7  131.00    9.19
   3   1  -7  140.90   10.35
  -3  -1   8  437.42   28.00
   3   1  -8  467.96   31.22
  -3  -1   9  338.02   22.25
   3   1  -9  349.40   23.80
  -3  -1  10  204.79   14.13
   3   1 -10  217.79   15.93
  -3  -1  11    9.61    2.08
   3   1 -11    9.89    2.42
  -3  -1  12  103.73    8.27
   3   1 -12  110.41    9.57
   3   1 -13  258.00   19.04
  -3  -1  14   15.35    2.79
  -3  -1  14   19.76    3.56
  -3  -1  15    6.78    2.27
  -3  -1  15    8.06    3.05
   3   1 -15    7.40    2.84
  -3  -1  16   23.01    3.67
  -3  -1  16   22.96    4.18
   3   1 -16   17.44    4.11
  -3  -1  17   86.50    8.01
  -3  -1  17   78.93    8.24
  -3  -1  18    3.91    3.13
   3   1 -18    8.60    3.52
   3   1 -18    6.45    3.88
  -3  -1  19   31.93    5.23
   3   1 -19   38.36    7.13
  -3  -1  20   25.98    4.90
  -3  -1  20   28.17    5.93
   3   1 -20   24.57    5.87
  -3  -1  21    7.96    4.55
  -3   0   1  815.01   50.11
   3   0  -1  848.97   53.35
  -3   0   2    3.79    0.64
   3   0  -2    4.03    0.67
  -3   0   3 1723.02  105.78
  -3   0   3 1807.27  132.06
   3   0  -3 1772.72  110.55
  -3   0   4 1890.17  117.40
   3   0  -4 1909.49  119.20
  -3   0   5  144.66   10.05
   3   0  -5  129.66    8.74
  -3   0   6  377.24   24.31
  -3   0   7  470.64   30.52
   3   0  -7  459.29   29.60
   3   0  -8   77.05    6.34
  -3   0   9    4.90    1.35
   3   0  -9    7.49    1.90
  -3   0  10   29.49    3.29
   3   0 -10   28.69    3.61
  -3   0  11  168.98   12.38
   3   0 -11  166.41   12.86
  -3   0  12  137.88   10.12
   3   0 -12  151.46   12.25
  -3   0  13    0.87    1.38
   3   0 -13    1.75    1.73
  -3   0  14   79.65    6.86
   3   0 -14   82.60    8.33
  -3   0  15   37.34    4.33
  -3   0  16   55.94    5.74
   3   0 -16   55.68    6.90
   3   0 -16   52.13    6.24
  -3   0  17    3.02    2.04
  -3   0  17    0.57    2.99
   3   0 -17    3.24    2.66
   3   0 -17    0.86    2.86
  -3   0  18   46.61    6.10
  -3   0  18   39.43    6.77
   3   0 -18   37.56    6.13
   3   0 -18   35.80    6.55
  -3   0  19   55.97    7.09
  -3   0  19   64.63    9.15
   3   0 -19   68.14    8.72
   3   0 -19   69.61    8.92
  -3   0  20    0.48    3.18
   3   0 -20    2.09    3.51
  -3   0  21    4.39    3.67
  -3   0  21    6.88    4.96
   3   0 -21    3.70    3.84
  -3   1   1  507.16   31.18
   3  -1  -1  538.81   39.39
  -3   1   2 1864.71  117.80
  -3   1   2 1785.94  128.19
   3  -1  -2 1847.56  115.92
   3  -1  -2 1750.91  124.67
  -3   1   3  580.00   36.92
  -3   1   3  585.58   43.08
   3  -1  -3  546.10   33.53
  -3   1   4  132.42    8.86
  -3   1   4  119.88    9.73
   3  -1  -4  136.09    9.33
  -3   1   5  449.72   29.54
  -3   1   5  375.99   26.44
   3  -1  -5  446.02   29.39
  -3   1   6  450.71   29.58
  -3   1   6  391.11   28.00
   3  -1  -6  441.52   29.01
  -3   1   7  108.31    8.84
   3  -1  -7  118.79    8.80
  -3   1   8   41.89    3.76
  -3   1   8   33.97    3.74
   3  -1  -8   40.98    3.99
  -3   1   9  163.71   11.79
  -3   1   9  132.92   10.67
   3  -1  -9  160.28   11.91
  -3   1  10   85.41    6.69
  -3   1  10   76.03    7.03
   3  -1 -10   91.61    7.83
  -3   1  11    6.39    1.62
  -3   1  11    5.65    2.31
   3  -1 -11    5.02    1.89
  -3   1  12   71.17    6.10
  -3   1  12   58.51    6.33
   3  -1 -12   68.55    6.78
   3  -1 -12   67.33    6.19
  -3   1  13   41.63    4.29
  -3   1  13   37.60    5.12
   3  -1 -13   40.84    4.76
  -3   1  14   36.41    4.01
  -3   1  14   33.87    5.22
   3  -1 -14   44.15    5.68
   3  -1 -14   40.15    4.77
  -3   1  15    4.07    1.86
  -3   1  15    4.30    3.40
   3  -1 -15    5.17    3.05
   3  -1 -15    4.06    2.42
  -3   1  16   43.84    6.89
   3  -1 -16   41.29    5.90
  -3   1  17  105.92    9.31
   3  -1 -17   89.22    9.38
   3  -1 -17  109.85   10.26
  -3   1  18    5.72    4.49
   3  -1 -18    9.29    4.04
   3  -1 -18    8.39    3.70
  -3   1  19   -0.92    4.48
   3  -1 -19   -1.29    2.57
   3  -1 -19    0.18    3.51
  -3   1  20   24.98    7.37
   3  -1 -20   18.69    5.48
   3  -1 -20   17.64    5.42
  -3   1  21   12.51    3.83
  -3   1  21   10.79    6.23
   3  -1 -21   11.33    4.90
  -3   2   1 2499.85  165.43
  -3   2   1 2234.87  161.78
   3  -2  -1 2097.06  125.59
   3  -2  -1 2028.46  118.03
   3  -2  -1 2383.52  176.10
   3  -2  -2  261.50   15.84
   3  -2  -2  276.86   17.26
   3  -2  -2  310.75   24.30
  -3   2   3  739.67   55.94
   3  -2  -3  655.03   41.12
   3  -2  -3  664.57   42.08
   3  -2  -3  574.68   39.67
  -3   2   4  568.01   35.84
  -3   2   4  596.23   44.49
   3  -2  -4  560.23   35.06
   3  -2  -4  544.00   33.47
  -3   2   5  453.93   30.00
  -3   2   5  377.20   28.17
   3  -2  -5  419.68   26.82
   3  -2  -5  418.53   26.76
  -3   2   6    9.87    1.32
   3  -2  -6    9.66    1.44
   3  -2  -6   11.64    1.44
  -3   2   7   94.71    6.82
  -3   2   7   84.75    8.54
   3  -2  -7   99.05    7.20
  -3   2   8  448.81   30.01
  -3   2   8  371.03   27.46
   3  -2  -8  440.88   29.61
   3  -2  -8  406.26   26.11
  -3   2   9   70.65    5.63
  -3   2   9   64.95    7.01
   3  -2  -9   71.90    6.12
   3  -2  -9   65.01    5.07
  -3   2  10  169.44   12.35
  -3   2  10  138.93   11.96
  -3   2  11  361.45   24.18
  -3   2  11  336.20   26.28
   3  -2 -11  382.29   26.89
   3  -2 -11  340.88   22.22
  -3   2  12  146.25   10.93
  -3   2  12  124.19   11.63
   3  -2 -12  151.98   12.29
   3  -2 -12  138.54   10.24
  -3   2  13   19.58    5.07
   3  -2 -13   16.52    3.24
  -3   2  14    2.90    1.53
  -3   2  14    1.53    3.84
   3  -2 -14    4.78    2.46
   3  -2 -14    1.46    2.00
  -3   2  15   95.26    7.97
  -3   2  15   87.37   10.23
   3  -2 -15  107.58   10.73
   3  -2 -15  104.66    9.05
  -3   2  16   91.85    8.03
  -3   2  16   89.70   11.12
   3  -2 -16  107.36   10.63
   3  -2 -16  104.04    9.31
  -3   2  17    1.27    1.94
  -3   2  17    0.30    5.03
   3  -2 -17    1.76    2.78
   3  -2 -17    1.48    2.64
  -3   2  18   24.22    4.09
  -3   2  18   27.66    7.71
   3  -2 -18   30.26    5.14
  -3   2  19    9.51    7.55
   3  -2 -19    7.72    3.89
   3  -2 -19    7.72    4.03
  -3   2  20   17.44    9.26
   3  -2 -20   10.35    4.27
  -3   2  21   -0.12    8.15
   3  -2 -21    0.26    3.41
  -3   3   1   27.32    1.71
   3  -3  -1   43.48    3.99
  -3   3   2  675.86   42.26
  -3   3   2  653.44   46.56
   3  -3  -2  693.53   43.86
   3  -3  -2  647.95   39.07
   3  -3  -2  742.56   55.98
  -3   3   3  700.05   44.35
   3  -3  -3  695.80   43.62
   3  -3  -3  685.30   42.28
   3  -3  -3  691.06   52.27
  -3   3   4  164.65   12.86
   3  -3  -4  145.63    9.41
   3  -3  -4  143.71   12.04
  -3   3   5  184.83   12.57
   3  -3  -5  176.25   11.63
   3  -3  -5  170.24   10.76
   3  -3  -5  172.55   13.37
  -3   3   6 1050.77   67.33
  -3   3   6  968.81   70.16
  -3   3   7  605.99   39.54
   3  -3  -7  551.59   33.95
  -3   3   8    3.33    1.11
   3  -3  -8    5.57    1.38
   3  -3  -8    4.45    1.10
   3  -3  -9  148.65   10.81
  -3   3  10  247.09   17.28
  -3   3  10  210.85   19.73
   3  -3 -10  246.08   17.47
   3  -3 -10  229.61   15.21
  -3   3  11   79.88    6.52
  -3   3  11   77.65   11.06
   3  -3 -11   81.23    7.09
   3  -3 -11   81.25    6.30
  -3   3  12   -0.33    1.25
  -3   3  12    3.12    6.22
   3  -3 -12    1.86    1.73
   3  -3 -12    1.19    1.49
  -3   3  13   82.64    6.90
   3  -3 -13   96.25    8.81
   3  -3 -13   84.29    6.99
  -3   3  14  147.72   11.36
  -3   3  14  131.68   15.00
   3  -3 -14  155.71   13.03
   3  -3 -14  152.67   11.53
  -3   3  15   32.84    4.13
  -3   3  15   33.81    9.33
   3  -3 -15   40.90    5.70
   3  -3 -15   32.36    4.02
  -3   3  16   20.58    3.72
  -3   3  16   21.06    9.28
   3  -3 -16   20.45    4.36
   3  -3 -16   20.26    3.57
  -3   3  17   51.16    6.14
  -3   3  17   50.97   11.79
   3  -3 -17   51.42    6.95
   3  -3 -17   44.32    5.21
  -3   3  18   70.54    7.91
  -3   3  18   63.70   13.63
   3  -3 -18   58.77    7.97
   3  -3 -18   59.29    6.43
  -3   3  19    3.38   11.67
   3  -3 -19    5.81    3.79
  -3   3  20   -0.04   13.51
   3  -3 -20   13.49    4.80
   3  -3 -20    9.17    4.02
   3  -3 -21   18.02    5.58
  -3   4   1  739.35   45.74
  -3   4   2  201.32   13.31
  -3   4   2  186.02   14.13
   3  -4  -2  168.11   12.40
  -3   4   3   53.51    3.99
  -3   4   3   51.07    3.54
  -3   4   3   57.00    4.97
   3  -4  -3   52.36    3.70
   3  -4  -3   45.90    2.88
   3  -4  -3   58.06    6.60
  -3   4   4  551.50   35.02
  -3   4   4  606.00   45.49
   3  -4  -4  561.42   35.39
   3  -4  -4  532.02   32.09
  -3   4   5  830.04   53.97
  -3   4   5  833.02   61.79
   3  -4  -5  841.69   54.49
   3  -4  -5  787.48   48.80
   3  -4  -5  694.60   48.74
  -3   4   6  208.76   14.14
  -3   4   6  210.52   16.34
   3  -4  -6  212.18   14.07
   3  -4  -6  211.10   13.55
   3  -4  -6  205.31   16.10
  -3   4   7  195.68   13.36
  -3   4   7  211.22   17.48
   3  -4  -7  199.62   13.47
   3  -4  -7  193.40   12.29
  -3   4   8  489.87   32.26
  -3   4   8  458.60   35.24
   3  -4  -8  494.69   32.43
   3  -4  -8  481.06   30.44
  -3   4   9  158.08   16.14
   3  -4  -9  184.65   13.38
  -3   4  10   32.36    3.66
  -3   4  10   28.08    9.47
   3  -4 -10   30.23    3.47
   3  -4 -10   31.98    2.93
  -3   4  11   21.43    2.86
   3  -4 -11   27.76    3.59
   3  -4 -11   23.91    2.64
  -3   4  12  199.68   14.17
  -3   4  12  219.67   25.36
   3  -4 -12  209.97   14.37
  -3   4  13  100.86    8.25
  -3   4  13   96.59   17.83
   3  -4 -13  118.23   10.22
   3  -4 -13  111.62    8.45
  -3   4  14    1.73    1.65
  -3   4  14   -9.65   12.26
   3  -4 -14    0.82    1.98
   3  -4 -14    0.10    1.53
  -3   4  15   92.00    8.33
  -3   4  15   91.63   18.96
   3  -4 -15   88.81    8.80
   3  -4 -15   89.85    7.39
  -3   4  16   22.20    3.95
   3  -4 -16   27.26    4.84
   3  -4 -16   22.02    3.54
  -3   4  17   32.02    5.05
  -3   4  17   33.65   19.92
   3  -4 -17   37.36    5.95
   3  -4 -17   30.90    4.23
  -3   4  18    0.17    2.51
  -3   4  18   -5.62   18.08
   3  -4 -18    0.63    2.31
   3  -4 -18    1.34    2.69
  -3   4  19   51.39   21.65
   3  -4 -19   38.20    6.61
   3  -4 -19   36.08    6.22
  -3   4  20   77.32   23.89
   3  -4 -20   65.57    8.93
   3  -4 -20   58.58    7.22
   3  -4 -21    3.00    3.88
  -3   5   1   91.41    5.10
  -3   5   1  186.84   16.34
   3  -5  -1  102.87    6.65
   3  -5  -1  138.35   11.53
  -3   5   2  148.93    9.05
  -3   5   2  162.56   12.74
   3  -5  -2  151.84    9.94
   3  -5  -2  162.55   10.71
   3  -5  -2  183.65   15.07
  -3   5   3  427.93   26.78
  -3   5   3  441.64   32.81
   3  -5  -3  416.99   25.92
   3  -5  -3  448.61   34.71
  -3   5   4  602.64   37.60
  -3   5   4  634.50   47.07
   3  -5  -4  636.52   40.95
   3  -5  -4  577.51   34.87
  -3   5   5    0.53    1.11
  -3   5   5    0.30    0.73
  -3   5   5    1.76    1.44
   3  -5  -5    0.36    0.57
   3  -5  -5    0.49    0.48
  -3   5   6  560.56   36.38
  -3   5   6  604.82   45.76
   3  -5  -6  601.73   39.61
   3  -5  -6  561.49   35.07
   3  -5  -6  490.59   35.67
  -3   5   7  517.85   34.65
   3  -5  -7  503.44   31.64
   3  -5  -7  480.47   35.94
  -3   5   8   88.45    7.32
  -3   5   8   98.18    9.10
   3  -5  -8   94.84    7.15
   3  -5  -8   93.82    6.44
   3  -5  -8   88.40    8.02
  -3   5   9   24.17    5.26
   3  -5  -9   17.88    2.44
  -3   5  10  124.08    9.80
  -3   5  10  124.43   13.08
   3  -5 -10  129.15    9.85
   3  -5 -10  122.43    8.33
  -3   5  11  289.09   20.22
  -3   5  11  267.48   23.77
   3  -5 -11  313.51   22.30
   3  -5 -11  288.69   18.78
  -3   5  12    6.71    2.25
   3  -5 -12    8.52    1.70
  -3   5  13   97.44    8.66
   3  -5 -13  109.65    9.55
   3  -5 -13  100.32    7.43
  -3   5  14  105.28    9.48
  -3   5  14  108.64   19.49
   3  -5 -14  116.48   10.42
   3  -5 -14   99.59    7.45
  -3   5  15   60.63    6.79
  -3   5  15   70.51   17.46
   3  -5 -15   69.76    7.67
   3  -5 -15   65.34    5.77
  -3   5  16   18.54    4.02
  -3   5  16   18.26   16.07
   3  -5 -16   19.87    4.24
   3  -5 -16   17.04    3.07
  -3   5  17   25.00    4.91
  -3   5  17   26.97   18.23
   3  -5 -17   22.08    4.75
   3  -5 -17   29.63    4.04
  -3   5  18   60.93    7.80
  -3   5  18   57.18   21.89
   3  -5 -18   60.14    7.98
   3  -5 -18   59.72    6.20
  -3   5  19   17.10   18.42
   3  -5 -19   10.94    4.17
   3  -5 -19   14.42    3.84
  -3   5  20   -0.25   16.85
   3  -5 -20    3.69    3.47
   3  -5 -20    3.36    3.49
   3  -5 -21   28.20    6.61
  -3   6   1  193.54   11.77
  -3   6   1  219.39   17.42
   3  -6  -1  200.94   13.08
   3  -6  -1  204.09   13.24
   3  -6  -1  236.04   18.89
  -3   6   2  219.02   13.63
  -3   6   2  230.21   17.92
  -3   6   3   99.43    6.63
  -3   6   3  106.33    9.05
   3  -6  -3   87.83    6.08
   3  -6  -3   96.09    6.62
  -3   6   4  175.79   11.21
  -3   6   4  190.89   15.00
   3  -6  -4  192.32   13.13
   3  -6  -4  171.15   10.89
  -3   6   5  439.10   28.03
  -3   6   5  436.52   32.40
   3  -6  -5  447.27   28.97
   3  -6  -5  419.65   25.96
  -3   6   6  193.86   15.15
   3  -6  -6  193.55   13.03
   3  -6  -6  183.50   11.68
  -3   6   7    0.40    1.29
  -3   6   7    0.67    2.15
   3  -6  -7    0.67    0.72
  -3   6   8   68.51    6.32
  -3   6   8   74.80    7.27
   3  -6  -8   66.94    5.32
   3  -6  -8   65.70    4.63
   3  -6  -8   66.63    7.19
  -3   6   9  375.96   28.87
   3  -6  -9  404.58   27.58
   3  -6  -9  345.18   26.40
  -3   6  10  322.77   23.06
  -3   6  10  315.60   24.91
   3  -6 -10  331.11   22.61
   3  -6 -10  314.81   19.98
  -3   6  11    3.29    2.23
   3  -6 -11    0.53    1.45
   3  -6 -11    1.79    1.08
  -3   6  12   63.01    6.98
  -3   6  12   61.22    8.99
   3  -6 -12   60.64    4.80
  -3   6  13  113.57   10.55
  -3   6  13  105.47   12.89
   3  -6 -13  112.24    9.69
   3  -6 -13  108.63    7.88
  -3   6  14   65.99    7.34
  -3   6  14   66.29   11.28
   3  -6 -14   71.37    7.38
   3  -6 -14   67.19    5.57
  -3   6  15    0.38    2.32
  -3   6  15   -0.14    8.16
   3  -6 -15    1.12    2.16
   3  -6 -15    1.08    1.76
  -3   6  16  191.37   16.61
  -3   6  16  169.72   21.35
   3  -6 -16  183.30   15.28
   3  -6 -16  178.33   12.79
  -3   6  17   79.61    9.53
   3  -6 -17   77.56    8.68
   3  -6 -17   73.91    6.59
  -3   6  18    0.01    2.98
  -3   6  18    6.40   13.75
   3  -6 -18    2.54    3.20
   3  -6 -18    1.88    2.28
  -3   6  19   47.91   16.67
   3  -6 -19   33.76    6.26
   3  -6 -19   30.61    4.85
  -3   6  20   25.07   15.26
   3  -6 -20   34.60    6.68
   3  -6 -20   34.46    5.50
   3  -6 -21   14.19    4.91
  -3   7   1  312.89   18.98
   3  -7  -1  335.99   21.88
   3  -7  -1  366.55   28.67
  -3   7   2    1.65    0.62
  -3   7   2    2.35    2.21
   3  -7  -2    1.09    1.15
   3  -7  -2    1.34    0.88
  -3   7   3  591.43   37.54
  -3   7   3  570.27   41.90
   3  -7  -3  556.26   35.18
   3  -7  -3  583.48   37.32
  -3   7   4  343.76   22.61
  -3   7   4  314.94   23.63
   3  -7  -4  299.52   19.01
   3  -7  -4  313.03   20.03
   3  -7  -4  333.44   28.05
  -3   7   5   11.05    1.46
  -3   7   5   13.27    2.67
   3  -7  -5   10.68    1.68
   3  -7  -5   11.33    1.63
   3  -7  -5   13.78    9.74
  -3   7   6   98.57    6.95
  -3   7   6  100.74    8.58
   3  -7  -6  104.63    7.73
   3  -7  -6   96.92    6.76
   3  -7  -6  113.18   17.02
  -3   7   7  217.83   14.86
  -3   7   7  215.14   16.74
   3  -7  -7  211.39   14.12
   3  -7  -7  222.44   14.85
   3  -7  -7  203.00   19.80
  -3   7   8  178.03   12.84
  -3   7   8  174.01   13.96
   3  -7  -8  175.07   12.02
   3  -7  -8  186.29   12.60
   3  -7  -8  178.96   16.56
  -3   7   9   45.02    5.01
   3  -7  -9   41.18    3.97
   3  -7  -9   42.48    3.51
   3  -7  -9   43.98    6.08
  -3   7  10  177.90   14.18
  -3   7  10  173.17   14.72
   3  -7 -10  170.35   12.47
   3  -7 -10  158.14   10.35
   3  -7 -10  155.32   13.47
  -3   7  11  254.33   19.37
  -3   7  11  242.52   19.68
   3  -7 -11  243.53   17.09
   3  -7 -11  239.36   15.55
  -3   7  12  113.89   11.04
  -3   7  12   94.62    9.41
   3  -7 -12  109.02    9.26
   3  -7 -12  104.79    7.56
  -3   7  13    3.16    2.93
  -3   7  13    0.72    4.60
   3  -7 -13    4.02    2.20
   3  -7 -13    3.14    1.54
  -3   7  14  137.10   13.21
  -3   7  14  131.46   13.48
   3  -7 -14  134.62   11.49
   3  -7 -14  122.52    8.76
  -3   7  15  255.29   21.56
   3  -7 -15  227.33   17.25
   3  -7 -15  237.60   16.23
  -3   7  16   23.28    5.90
  -3   7  16   15.36    7.59
   3  -7 -16   22.23    4.40
   3  -7 -16   23.54    3.44
  -3   7  17   14.81    5.72
  -3   7  17   12.03    7.89
   3  -7 -17   17.84    4.48
   3  -7 -17   11.11    2.90
  -3   7  18   93.77   12.18
  -3   7  18   61.56   11.61
   3  -7 -18   79.33    9.34
   3  -7 -18   77.65    7.26
  -3   7  19   31.57   10.56
   3  -7 -19   34.00    6.38
   3  -7 -19   28.06    4.78
  -3   7  20    6.06    8.66
   3  -7 -20   -1.04    3.25
   3  -7 -20    0.99    3.15
   3  -7 -21   14.60    5.11
  -3   8   1  116.78    7.70
  -3   8   1  122.28   10.48
   3  -8  -1  116.61    8.34
   3  -8  -1  137.15   11.97
  -3   8   2  540.90   33.67
  -3   8   2  626.88   48.77
   3  -8  -2  521.26   32.78
   3  -8  -2  589.30   39.01
   3  -8  -2  504.19   36.28
  -3   8   3  243.19   15.56
  -3   8   3  244.26   19.13
   3  -8  -3  238.97   19.69
  -3   8   4    1.42    0.87
  -3   8   4   -0.90    2.35
   3  -8  -4    0.99    1.32
   3  -8  -4    0.32    1.18
   3  -8  -4    1.09    4.62
  -3   8   5  241.30   18.92
   3  -8  -5  221.44   14.61
  -3   8   6  276.57   19.12
  -3   8   6  254.14   19.88
   3  -8  -6  253.02   17.27
   3  -8  -6  235.93   15.50
   3  -8  -6  195.82   21.80
  -3   8   7   74.38    5.99
  -3   8   7   62.99    5.99
   3  -8  -7   69.33    5.61
   3  -8  -7   68.08    5.47
  -3   8   8   55.25    4.86
  -3   8   8   61.13    6.10
   3  -8  -8   59.74    5.16
   3  -8  -8   53.69    9.38
  -3   8   9  370.34   27.17
   3  -8  -9  414.58   27.78
   3  -8  -9  426.09   28.37
   3  -8  -9  388.77   31.43
  -3   8  10  249.07   18.29
  -3   8  10  222.52   17.37
   3  -8 -10  247.28   17.38
   3  -8 -10  247.56   16.75
   3  -8 -10  232.28   19.68
  -3   8  11   13.10    3.13
  -3   8  11   14.78    4.02
   3  -8 -11   16.83    2.85
   3  -8 -11   16.05    2.37
   3  -8 -11   17.25    4.13
  -3   8  12  104.37   10.00
  -3   8  12   94.25    9.21
   3  -8 -12   95.52    8.28
   3  -8 -12   88.78    6.56
  -3   8  13  158.11   13.53
   3  -8 -13  183.62   14.53
  -3   8  14  115.51   11.98
  -3   8  14   95.39    9.66
   3  -8 -14  119.39   10.67
   3  -8 -14  113.71    8.65
  -3   8  15    0.18    3.61
  -3   8  15    5.32    4.99
   3  -8 -15   -0.83    2.37
   3  -8 -15    1.57    1.97
  -3   8  16   93.62   11.99
   3  -8 -16   82.06    8.76
   3  -8 -16   81.46    6.89
  -3   8  17  104.82   13.24
  -3   8  17   90.60   11.18
   3  -8 -17  100.73   10.40
   3  -8 -17   89.56    7.64
  -3   8  18   17.71    6.89
  -3   8  18   19.33    7.01
   3  -8 -18   19.23    4.96
   3  -8 -18   16.80    3.53
  -3   8  19    3.19    6.26
  -3   8  20   35.93    8.84
   3  -8 -20   42.04    7.47
   3  -8 -20   46.13    6.47
   3  -8 -21   23.26    6.41
  -3   9   1  166.13   11.01
  -3   9   1  182.92   15.43
   3  -9  -1  166.13   11.84
  -3   9   2    1.92    3.22
   3  -9  -2    0.92    1.45
   3  -9  -2    0.85    3.41
  -3   9   3   15.18    3.61
   3  -9  -3   14.38    2.52
   3  -9  -3   17.41    5.16
  -3   9   4   92.25    6.46
  -3   9   4  100.96    9.32
   3  -9  -4   87.19    7.30
   3  -9  -4   84.59    6.69
   3  -9  -4  100.06   11.69
  -3   9   5  176.89   12.29
  -3   9   5  164.02   13.49
   3  -9  -5  151.18   10.78
   3  -9  -5  154.23   10.97
  -3   9   6   26.31    2.77
  -3   9   6   22.98    3.64
   3  -9  -6   21.43    2.78
   3  -9  -6   23.79    3.00
   3  -9  -6   24.07   12.58
  -3   9   7  205.44   14.27
  -3   9   7  190.17   15.00
   3  -9  -7  196.85   13.65
   3  -9  -7  210.48   26.31
  -3   9   8  523.62   35.45
  -3   9   8  451.89   32.76
   3  -9  -8  507.64   33.72
   3  -9  -8  476.27   30.62
   3  -9  -8  506.12   44.41
  -3   9   9   95.88    8.40
  -3   9   9   67.69    6.48
   3  -9  -9   74.40    6.19
   3  -9  -9   77.66    6.46
   3  -9  -9   85.71   11.91
  -3   9  10   45.07    5.31
   3  -9 -10   40.22    4.33
   3  -9 -10   35.15    3.79
   3  -9 -10   38.41    6.89
  -3   9  11  137.82   11.67
   3  -9 -11  156.82   11.60
  -3   9  12  283.76   22.56
  -3   9  12  213.91   16.81
   3  -9 -12  238.07   17.21
   3  -9 -12  240.90   16.64
  -3   9  13   89.94    9.50
  -3   9  13   64.74    6.72
   3  -9 -13   88.51    8.31
   3  -9 -13   76.67    6.62
  -3   9  14   50.57    7.25
  -3   9  14   43.52    6.71
   3  -9 -14   41.97    5.55
   3  -9 -14   34.29    4.13
  -3   9  15  186.22   17.75
  -3   9  15  129.05   11.92
   3  -9 -15  141.65   10.76
  -3   9  16   35.22    5.55
   3  -9 -16   42.18    6.06
   3  -9 -16   40.56    4.84
  -3   9  17    1.22    4.79
  -3   9  17    0.53    3.91
   3  -9 -17    2.29    3.14
   3  -9 -17    3.52    2.60
  -3   9  18   28.48    8.11
  -3   9  18   19.97    5.49
   3  -9 -18   18.80    4.10
  -3   9  19   54.42    7.98
   3  -9 -19   60.92    8.71
   3  -9 -19   40.96    6.52
  -3   9  20    8.07    5.49
   3  -9 -20   18.26    5.83
   3  -9 -20   17.64    5.02
   3  -9 -21    5.88    4.60
  -3  10   1   53.60    4.27
  -3  10   1   68.44    7.64
   3 -10  -1   50.01    4.94
   3 -10  -1   71.94    8.08
  -3  10   2  174.37   11.79
  -3  10   2  177.00   15.10
   3 -10  -2  155.30   11.12
   3 -10  -2  165.47   12.15
   3 -10  -2  186.52   16.36
  -3  10   3  277.98   18.19
  -3  10   3  312.57   25.59
   3 -10  -3  239.37   16.25
   3 -10  -3  265.06   18.25
   3 -10  -3  286.82   24.22
  -3  10   4  115.90    8.28
  -3  10   4  107.25    9.80
   3 -10  -4  102.41    8.76
   3 -10  -4  100.86    8.10
   3 -10  -4  109.43   12.68
  -3  10   5   62.06    4.93
  -3  10   5   56.73    5.82
   3 -10  -5   57.56    5.65
   3 -10  -5   60.03   11.32
  -3  10   6  408.10   27.40
   3 -10  -6  360.44   23.76
   3 -10  -6  371.20   37.65
  -3  10   7  201.87   14.62
   3 -10  -7  182.14   13.18
   3 -10  -7  163.11   11.56
  -3  10   8   -0.34    1.65
  -3  10   8   -0.51    2.83
   3 -10  -8   -1.06    1.50
   3 -10  -8    0.12    1.74
   3 -10  -8   -3.42   10.78
  -3  10   9  119.38    9.73
  -3  10   9  111.28    9.81
   3 -10  -9  114.79    8.99
   3 -10  -9  112.58    9.08
   3 -10  -9  112.87   14.86
  -3  10  10  227.80   17.58
  -3  10  10  205.58   16.35
   3 -10 -10  215.88   15.40
   3 -10 -10  218.29   15.75
   3 -10 -10  222.99   21.30
  -3  10  11   75.99    7.41
   3 -10 -11   82.64    7.24
   3 -10 -11   92.44    8.17
   3 -10 -11   90.69   11.00
   3 -10 -12    9.01    2.73
   3 -10 -12    5.53    2.67
   3 -10 -12   10.10    4.31
  -3  10  13  274.07   21.56
   3 -10 -13  300.39   21.93
   3 -10 -13  294.00   20.76
  -3  10  14  160.12   13.52
   3 -10 -14  179.51   14.48
   3 -10 -14  194.22   15.07
  -3  10  15    0.72    3.51
  -3  10  15    2.34    3.45
   3 -10 -15    0.58    2.29
   3 -10 -15    0.42    2.82
  -3  10  16   48.56    6.32
   3 -10 -16   49.76    6.77
  -3  10  17  139.91   15.44
  -3  10  17   87.73    9.24
   3 -10 -17   88.19    9.52
   3 -10 -17   93.57    9.09
  -3  10  18   51.75    9.53
  -3  10  18   33.62    6.02
   3 -10 -18   42.07    7.04
   3 -10 -18   45.94    6.70
  -3  10  19   -3.08    4.17
   3 -10 -19    0.01    3.21
   3 -10 -19    0.61    3.58
   3 -10 -20    7.37    5.16
   3 -10 -20   13.01    4.85
  -3  11   1  242.73   16.13
  -3  11   1  259.41   21.49
   3 -11  -1  229.68   16.25
   3 -11  -1  256.22   20.91
  -3  11   2  174.33   12.13
  -3  11   2  178.62   15.51
   3 -11  -2  145.55   10.77
   3 -11  -2  161.04   12.36
   3 -11  -2  176.50   15.87
  -3  11   3    5.26    1.46
  -3  11   3   17.18    4.45
   3 -11  -3    5.48    2.73
   3 -11  -3    4.57    2.30
  -3  11   4  406.74   26.97
  -3  11   4  379.26   29.29
   3 -11  -4  366.97   25.58
   3 -11  -4  372.17   25.31
   3 -11  -4  383.93   32.36
  -3  11   5  404.70   27.57
  -3  11   5  376.53   29.76
   3 -11  -5  349.83   24.06
   3 -11  -5  347.95   23.69
   3 -11  -5  331.17   29.83
  -3  11   6   16.99    2.57
   3 -11  -6   10.20    2.71
   3 -11  -6   13.51    3.22
   3 -11  -6    4.81   14.84
  -3  11   7   62.78    5.68
   3 -11  -7   54.96    5.40
   3 -11  -7   51.71    5.59
  -3  11   8  165.58   12.87
  -3  11   8  151.24   13.11
   3 -11  -8  144.01   10.94
   3 -11  -8  123.09    9.45
   3 -11  -8  175.15   27.22
  -3  11   9  143.96   11.51
  -3  11   9  125.75   10.82
   3 -11  -9  142.52   11.08
   3 -11  -9  136.61   11.11
   3 -11  -9  148.16   19.72
  -3  11  10   10.97    3.29
   3 -11 -10    7.44    2.56
   3 -11 -10    9.01    3.37
   3 -11 -10   16.03    8.06
  -3  11  11  197.75   16.73
  -3  11  11  190.65   15.87
   3 -11 -11  190.70   14.21
   3 -11 -11  182.19   14.00
   3 -11 -11  197.09   19.42
  -3  11  12  326.12   25.54
   3 -11 -12  325.36   22.76
   3 -11 -12  351.27   25.56
   3 -11 -12  317.87   27.07
  -3  11  13   28.29    4.91
   3 -11 -13   30.77    4.63
   3 -11 -13   31.65    5.20
   3 -11 -13   30.76    6.13
  -3  11  14   10.09    3.58
   3 -11 -14    9.53    3.29
   3 -11 -14   10.00    3.89
  -3  11  15  105.54   10.10
   3 -11 -15  102.52    9.93
   3 -11 -15  103.54    9.90
  -3  11  16   68.73    7.52
   3 -11 -16   80.82    9.22
   3 -11 -16   78.65    8.93
  -3  11  17   18.33    4.71
   3 -11 -17   18.60    4.87
   3 -11 -17   16.32    4.96
  -3  11  18   18.02    4.88
   3 -11 -18   18.19    5.27
   3 -11 -18    8.90    4.81
   3 -11 -19   66.55    9.57
   3 -11 -19   45.25    7.51
   3 -11 -20   22.99    6.67
   3 -11 -20   18.40    5.63
  -3  12   1    2.91    1.93
  -3  12   1    3.76    3.48
   3 -12  -1    0.74    2.02
   3 -12  -1    2.29    2.54
  -3  12   2  126.87    9.40
  -3  12   2  135.48   12.76
   3 -12  -2  110.81    9.54
   3 -12  -2  105.28    9.17
   3 -12  -2  126.22   12.26
  -3  12   3  332.89   22.36
  -3  12   3  292.34   22.51
   3 -12  -3  298.19   21.51
   3 -12  -3  317.14   22.82
   3 -12  -3  347.12   29.58
  -3  12   4   87.13    6.90
  -3  12   4   82.74    8.87
   3 -12  -4   69.58    7.56
   3 -12  -4   79.15    7.98
  -3  12   5   29.40    3.35
  -3  12   5   22.81    4.37
   3 -12  -5   20.91    4.21
   3 -12  -5   22.41    4.41
   3 -12  -5   19.18    9.11
  -3  12   6  131.24   10.21
  -3  12   6  108.87   10.14
   3 -12  -6  103.65    8.99
   3 -12  -6  105.60    9.72
  -3  12   7  123.60    9.98
  -3  12   7   92.02    8.29
   3 -12  -7  105.24    9.10
   3 -12  -7  101.04    9.44
   3 -12  -7  107.26   24.30
  -3  12   8   32.97    5.10
   3 -12  -8   30.12    4.93
   3 -12  -8   58.54   20.52
  -3  12   9   33.12    4.65
  -3  12   9   29.48    4.72
   3 -12  -9   37.42    4.67
   3 -12  -9   28.98    5.02
   3 -12  -9   41.45   14.05
  -3  12  10  232.07   18.04
  -3  12  10  193.93   15.42
   3 -12 -10  228.25   17.10
   3 -12 -10  213.12   16.72
   3 -12 -10  224.18   24.26
  -3  12  11  125.46   11.69
  -3  12  11  107.84    9.98
   3 -12 -11  125.15   15.52
  -3  12  12    1.27    3.27
   3 -12 -12   -1.15    2.34
   3 -12 -12    3.34    3.78
  -3  12  13   61.46    7.10
   3 -12 -13   60.70    6.79
   3 -12 -13   54.32    7.49
   3 -12 -13   55.09    8.38
  -3  12  14  112.14   10.42
   3 -12 -14  128.17   11.70
   3 -12 -14  122.59   12.20
  -3  12  15   32.21    5.51
   3 -12 -15   39.98    6.11
  -3  12  16    1.87    3.31
   3 -12 -16   -0.89    3.11
   3 -12 -16   -1.13    4.05
  -3  12  17   39.16    5.87
   3 -12 -17   33.51    6.88
  -3  12  18   45.24    6.07
   3 -12 -18   63.83    9.11
   3 -12 -18   42.30    7.95
   3 -12 -19    4.75    4.86
   3 -12 -19   -1.32    4.44
  -3  13   1  155.23   11.54
  -3  13   1  184.75   16.51
   3 -13  -1  182.60   16.34
   3 -13  -2  194.25   15.93
   3 -13  -2  192.67   17.28
  -3  13   3    7.30    4.42
   3 -13  -3    8.08    3.54
   3 -13  -3    9.28    5.96
  -3  13   4  132.61    9.99
   3 -13  -4  125.48   11.36
   3 -13  -4  145.43   16.74
  -3  13   5  202.34   17.23
   3 -13  -5  197.96   16.30
   3 -13  -5  194.91   22.34
  -3  13   6   73.58    7.73
   3 -13  -6   69.93    8.48
   3 -13  -6  125.52   26.59
  -3  13   7    0.27    2.07
  -3  13   7    1.03    3.52
   3 -13  -7   -0.61    2.60
   3 -13  -7    1.08    3.42
   3 -13  -7   -4.25   14.10
  -3  13   8  168.84   13.39
  -3  13   8  136.52   11.81
   3 -13  -8  162.45   13.15
   3 -13  -8  150.70   13.56
   3 -13  -8  154.27   28.05
  -3  13   9  233.88   18.22
  -3  13   9  188.28   15.23
   3 -13  -9  212.82   16.12
   3 -13  -9  201.60   17.08
   3 -13  -9  251.20   31.94
  -3  13  10    3.53    3.37
  -3  13  10    3.76    3.66
   3 -13 -10    3.91    2.61
   3 -13 -10    5.53    4.05
   3 -13 -10    0.51    9.45
  -3  13  11   52.29    7.37
  -3  13  11   37.83    5.36
   3 -13 -11   52.39    6.16
   3 -13 -11   43.43    7.17
   3 -13 -11   55.25   11.15
  -3  13  12  101.78   12.08
   3 -13 -12   80.99    7.93
   3 -13 -12   83.39   10.37
   3 -13 -12   80.91   12.07
  -3  13  13   60.24    6.98
   3 -13 -13   76.18   10.14
   3 -13 -13   74.51   10.31
  -3  13  14   -1.17    3.43
   3 -13 -14    0.33    2.67
   3 -13 -14    2.89    4.53
   3 -13 -14   -1.62    4.03
  -3  13  15   40.51    5.92
   3 -13 -15   37.77    6.44
   3 -13 -15   37.14    7.88
  -3  13  16   74.11    7.98
   3 -13 -16   99.55   11.13
   3 -13 -16   78.00   10.52
  -3  13  17   10.45    4.02
   3 -13 -17   15.67    5.44
   3 -13 -17   11.49    5.50
   3 -13 -18   12.04    6.15
   3 -13 -18    8.81    5.52
  -3  14   1   21.95    3.88
  -3  14   1   21.93    4.61
   3 -14  -1   20.31    4.95
   3 -14  -1   14.71    4.72
  -3  14   2   49.25    5.01
  -3  14   2   56.70    7.09
   3 -14  -2   48.76    7.60
   3 -14  -2   43.92    7.85
   3 -14  -2   61.07    8.74
  -3  14   3  169.34   12.15
  -3  14   3  192.91   17.22
   3 -14  -3  173.34   16.05
   3 -14  -3  164.73   14.91
   3 -14  -3  180.49   17.83
  -3  14   4   59.87    5.72
  -3  14   4   60.83    7.52
   3 -14  -4   56.01   11.20
  -3  14   5    2.02    2.13
  -3  14   5    2.80    4.07
   3 -14  -5   -0.01    3.24
   3 -14  -5    0.72    3.74
   3 -14  -5   -2.62   10.01
  -3  14   6   60.29    6.08
  -3  14   6   56.50    7.35
   3 -14  -6   60.71    7.64
   3 -14  -6   53.10    8.27
   3 -14  -6   46.93   17.63
  -3  14   7  240.71   18.06
  -3  14   7  213.31   17.88
   3 -14  -7  231.57   18.64
   3 -14  -7  167.37   28.37
  -3  14   8   99.57    9.46
  -3  14   8   78.30    8.49
   3 -14  -8   85.24    8.62
   3 -14  -8   85.70   10.68
   3 -14  -8   84.68   24.89
  -3  14   9    5.81    3.89
  -3  14   9    8.64    4.30
   3 -14  -9    5.26    3.01
   3 -14  -9    7.08    4.87
   3 -14  -9   -2.19   14.66
  -3  14  10  102.05   10.88
  -3  14  10   70.21    7.30
   3 -14 -10   90.25    9.09
   3 -14 -10   96.02   12.18
   3 -14 -10   91.02   17.20
  -3  14  11   97.50   11.20
  -3  14  11   66.96    7.20
   3 -14 -11   96.53    9.65
   3 -14 -11   86.77   11.65
   3 -14 -11   95.58   15.84
  -3  14  12    7.72    3.80
   3 -14 -12    9.33    5.90
   3 -14 -12   14.61    7.03
  -3  14  13   17.11    4.07
   3 -14 -13   21.16    5.07
   3 -14 -13   23.84    7.42
  -3  14  14   73.70    7.95
   3 -14 -14   87.96    9.96
   3 -14 -14   87.66   12.40
   3 -14 -14   69.97    9.58
   3 -14 -15   61.67    8.68
   3 -14 -15   56.78   10.21
   3 -14 -16   -2.71    4.44
   3 -14 -16    1.33    4.97
  -3  15   1  127.31   10.58
   3 -15  -1  118.10   12.55
   3 -15  -1  125.03   13.33
   3 -15  -1  131.07   13.30
  -3  15   2  122.29    9.86
   3 -15  -2  124.36   13.80
   3 -15  -2  123.49   13.62
   3 -15  -2  120.80   13.02
  -3  15   3    2.53    2.38
   3 -15  -3    1.98    4.69
   3 -15  -3    2.73    4.33
   3 -15  -3    0.28    6.23
  -3  15   4   39.23    4.88
   3 -15  -4   42.20    8.28
   3 -15  -4   40.26    8.29
   3 -15  -4   47.31   11.98
  -3  15   5  133.12   10.95
   3 -15  -5  126.53   12.99
   3 -15  -5  115.80   13.17
   3 -15  -5  107.17   18.47
  -3  15   6  127.37   10.75
   3 -15  -6  130.73   12.83
   3 -15  -6  112.59   12.85
   3 -15  -6  103.65   23.15
  -3  15   7    0.75    2.92
   3 -15  -7    0.22    3.13
   3 -15  -7    0.53    4.83
   3 -15  -7    3.26   21.04
  -3  15   8   69.38    8.02
   3 -15  -8   81.92    9.02
   3 -15  -8   71.98   10.95
   3 -15  -8   77.29   23.07
  -3  15   9  113.84   11.58
   3 -15  -9  107.77   10.58
   3 -15  -9   97.84   13.02
   3 -15  -9  106.59   21.75
  -3  15  10   20.29    5.99
   3 -15 -10   16.60    7.61
   3 -15 -10   13.90   11.43
  -3  15  11    5.28    5.06
   3 -15 -11    6.40    3.90
   3 -15 -11   10.68    6.88
   3 -15 -11   12.83    9.87
  -3  15  12   58.49    9.80
   3 -15 -12   51.58    9.64
   3 -15 -13   53.24    8.10
   3 -15 -13   58.63   11.89
   3 -15 -13   50.74    8.93
   3 -15 -14    5.21    4.62
   3 -15 -14    2.45    6.84
   3 -15 -14    8.86    4.89
   3 -15 -15   16.27    4.89
  -3  16   1   20.35    4.67
   3 -16  -1   25.99    7.40
   3 -16  -1   29.68    8.38
   3 -16  -1   22.77    6.70
   3 -16  -2    3.88    6.09
  -3  16   3   60.80    7.16
   3 -16  -3   57.39   10.27
   3 -16  -3   57.05   11.53
  -3  16   4  129.82   11.64
   3 -16  -4   91.51   14.95
  -3  16   5   33.87    5.52
   3 -16  -5   31.97    7.86
   3 -16  -5   33.85    8.21
   3 -16  -5   34.91   14.47
  -3  16   6   20.39    4.87
   3 -16  -6   15.50    5.70
   3 -16  -6   20.27    7.15
   3 -16  -6   26.32   17.20
  -3  16   7  162.43   14.82
   3 -16  -7  119.66   15.10
   3 -16  -8   93.87   13.91
  -3  16   9   -2.97    4.87
   3 -16  -9   -1.33    4.08
   3 -16  -9    1.43    6.31
   3 -16  -9    3.98   13.18
  -3  16  10   47.02    8.49
   3 -16 -10   50.81    8.42
   3 -16 -10   45.05   11.00
   3 -16 -10   29.45   13.01
   3 -16 -12   25.30    7.74
   3 -16 -13    8.52    5.25
  -3  17   1   17.08    5.60
   3 -17  -1   23.68    9.40
   3 -17  -1   21.13    8.30
  -3  17   2   31.20    6.69
   3 -17  -2   40.76   11.87
   3 -17  -2   36.83   10.18
   3 -17  -2   28.71    8.42
   3 -17  -3   27.80   10.91
   3 -17  -3   23.11    9.97
   3 -17  -4   -0.95    7.50
   3 -17  -4    3.03    9.15
   3 -17  -6   87.33   12.91
   3 -17  -6   51.82   14.97
   3 -17  -7    8.39   13.46
   3 -17  -8   17.92   12.94
   3 -17  -9   23.40   11.30
   3 -17 -10   51.12   11.48
   3 -17 -11    2.75    8.09
   2  18  -1    5.66    3.79
   2  18  -2    3.77    4.07
  -2 -17   1   49.79    9.66
  -2 -17   1   42.66    7.49
  -2 -17   2   27.19    7.56
   2  17  -2   27.31    5.55
   2  17  -3   -0.43    3.81
   2  17  -4   38.96    7.07
  -2 -16   1    2.01    5.15
   2  16  -1   -1.31    2.90
  -2 -16   2   52.26    8.68
  -2 -16   2   46.01    6.95
   2  16  -2   55.02    7.54
  -2 -16   3  123.65   14.00
  -2 -16   3  110.88   10.78
   2  16  -3  131.18   12.83
  -2 -16   4   37.19    8.47
  -2 -16   4   26.85    5.00
  -2 -16   5    3.76    3.24
   2  16  -5    3.64    4.31
   2  16  -6   32.59    6.78
  -2 -15   1  175.15   16.14
  -2 -15   1  161.75   14.57
   2  15  -1  173.17   14.13
  -2 -15   2   75.28    9.37
  -2 -15   2   89.18    9.57
   2  15  -2   79.12    9.04
  -2 -15   3    2.33    3.68
  -2 -15   3    1.94    3.37
   2  15  -3   -1.53    3.25
   2  15  -3   -0.67    2.74
  -2 -15   4   43.69    7.71
  -2 -15   4   41.33    5.96
   2  15  -4   48.72    7.49
   2  15  -4   40.83    5.42
  -2 -15   5   50.15    8.32
  -2 -15   5   60.44    7.01
   2  15  -5   80.16   10.11
  -2 -15   6   11.05    5.10
  -2 -15   7    5.96    3.50
   2  15  -7    5.62    4.50
   2  15  -8   40.43    7.92
  -2 -14   1   10.31    4.28
  -2 -14   1   10.07    4.18
   2  14  -1   11.70    3.41
   2  14  -1   10.47    3.89
  -2 -14   2   78.89    9.21
   2  14  -2   84.13    8.29
   2  14  -2   77.11    8.06
  -2 -14   3  178.62   15.72
  -2 -14   3  177.74   15.37
   2  14  -3  190.77   15.55
   2  14  -3  156.23   13.15
  -2 -14   4   55.20    7.79
  -2 -14   4   69.99    7.82
   2  14  -4   54.30    7.95
  -2 -14   5   -0.59    2.91
  -2 -14   5   -0.35    3.35
   2  14  -5    1.75    2.77
  -2 -14   6   21.20    5.33
  -2 -14   6   30.55    4.94
   2  14  -6   27.65    5.59
  -2 -14   7   59.96    8.30
   2  14  -7   91.82   10.97
  -2 -14   8   24.57    6.41
  -2 -14   8   36.15    5.33
   2  14  -8   25.94    7.50
  -2 -14   9    6.05    3.21
   2  14  -9    8.79    5.27
   2  14 -10   57.01    9.17
  -2 -13   1  167.57   14.29
  -2 -13   1  155.11   13.46
   2  13  -1  163.61   12.72
   2  13  -1  158.67   14.00
  -2 -13   2  192.99   16.03
  -2 -13   2  184.34   15.63
   2  13  -2  188.68   14.43
   2  13  -2  172.29   14.36
  -2 -13   3    8.99    3.69
   2  13  -3    5.59    2.92
   2  13  -3   11.75    3.64
  -2 -13   4   57.07    7.06
  -2 -13   4   61.02    6.67
   2  13  -4   65.64    7.23
   2  13  -4   54.87    6.34
  -2 -13   5  123.68   11.64
   2  13  -5  135.09   12.09
  -2 -13   6  145.02   13.14
  -2 -13   6  169.87   14.68
  -2 -13   7    5.87    3.74
  -2 -13   7   11.97    3.46
   2  13  -7   11.74    4.15
  -2 -13   8   61.54    8.19
  -2 -13   8   59.85    6.35
   2  13  -8   75.72    9.40
  -2 -13   9  109.63   11.12
  -2 -13   9  138.19   12.09
   2  13  -9  155.68   15.44
  -2 -13  10   36.10    6.81
  -2 -13  10   47.27    5.62
   2  13 -10   43.86    7.71
  -2 -13  11    0.34    2.60
   2  13 -11   -2.57    3.51
  -2 -12   1   69.90    7.17
   2  12  -1   75.05    6.74
   2  12  -1   80.17    8.19
  -2 -12   2   17.77    3.87
  -2 -12   2   21.15    4.53
   2  12  -2   22.75    3.58
   2  12  -2   22.29    4.38
  -2 -12   3  157.56   13.05
  -2 -12   3  169.44   14.45
   2  12  -3  159.51   13.77
  -2 -12   4  233.04   17.95
  -2 -12   4  230.96   18.49
   2  12  -4  240.48   17.81
  -2 -12   5  107.70   10.00
   2  12  -5   96.00    8.83
   2  12  -5   98.69    9.66
  -2 -12   6   35.47    5.54
  -2 -12   6   42.37    5.31
   2  12  -6   46.12    6.05
  -2 -12   7  206.57   16.53
  -2 -12   7  211.13   16.82
   2  12  -7  242.73   19.60
  -2 -12   8   50.53    6.93
  -2 -12   8   66.93    7.07
   2  12  -8   57.73    7.55
  -2 -12   9    2.14    2.57
   2  12  -9    0.37    2.96
  -2 -12  10   16.05    4.56
  -2 -12  10   25.38    3.92
   2  12 -10   29.78    6.14
  -2 -12  11   78.32    9.18
  -2 -12  11   80.73    7.84
   2  12 -11   80.89   10.30
  -2 -12  12   40.08    4.97
   2  12 -12   34.72    7.25
  -2 -12  13    8.80    3.05
  -2 -11   1  107.29    9.37
  -2 -11   1  107.61   10.07
   2  11  -1  123.76    9.89
   2  11  -1  106.91    9.82
  -2 -11   2  351.47   24.56
  -2 -11   2  338.56   25.62
   2  11  -2  368.09   25.32
   2  11  -2  361.03   28.28
  -2 -11   3  135.92   10.96
  -2 -11   3  172.88   15.02
   2  11  -3  142.70   10.93
   2  11  -3  158.54   13.83
  -2 -11   4    8.48    2.96
  -2 -11   4    8.53    3.58
   2  11  -4   12.84    2.98
   2  11  -4    6.17    2.88
  -2 -11   5  324.85   23.58
  -2 -11   5  324.31   25.17
   2  11  -5  308.70   24.90
  -2 -11   6  276.91   20.43
  -2 -11   6  284.23   22.08
   2  11  -6  299.49   21.94
  -2 -11   7   23.61    4.71
  -2 -11   7   38.76    4.93
   2  11  -7   31.77    4.82
  -2 -11   8   18.69    4.09
  -2 -11   8   23.20    3.70
   2  11  -8   28.49    4.91
  -2 -11   9  103.64    9.84
  -2 -11   9  129.22   11.44
   2  11  -9  127.09   12.00
  -2 -11  10   63.42    7.70
  -2 -11  10   68.89    6.99
   2  11 -10   71.99    8.79
  -2 -11  11   -0.30    2.79
  -2 -11  11    2.33    2.46
   2  11 -11   -0.22    2.70
  -2 -11  12   46.22    6.75
  -2 -11  12   58.60    6.32
   2  11 -13   54.15    8.57
  -2 -11  14   10.64    3.25
   2  11 -14    4.40    4.58
  -2 -11  15    2.01    2.73
  -2 -10   1  586.98   37.37
  -2 -10   1  654.11   49.86
   2  10  -1  641.88   42.11
   2  10  -1  621.71   46.61
  -2 -10   2  116.71    9.33
  -2 -10   2  150.25   13.31
   2  10  -2  126.06    9.65
   2  10  -3  110.61    9.16
   2  10  -3   93.03    8.49
  -2 -10   4  330.73   23.02
  -2 -10   4  338.50   26.02
   2  10  -4  343.07   23.77
   2  10  -4  323.56   25.09
  -2 -10   5  114.21    9.60
  -2 -10   5  129.08   11.20
   2  10  -5  115.99    9.38
   2  10  -5  126.66   11.51
  -2 -10   6   18.63    3.66
  -2 -10   6   23.49    3.82
   2  10  -6   22.16    3.59
  -2 -10   7  197.53   15.46
   2  10  -7  197.51   15.15
  -2 -10   8  178.16   14.96
  -2 -10   8  192.26   15.63
   2  10  -8  193.86   15.38
  -2 -10   9   30.99    4.88
  -2 -10   9   48.92    5.54
   2  10  -9   40.20    5.58
  -2 -10  10   27.04    4.76
  -2 -10  10   34.15    4.57
   2  10 -10   39.71    5.88
  -2 -10  11  152.23   12.89
  -2 -10  11  180.93   15.23
   2  10 -11  166.92   14.54
  -2 -10  12   33.20    5.37
  -2 -10  12   43.94    5.39
   2  10 -12   36.21    6.21
  -2 -10  13   -0.29    2.43
  -2 -10  13    4.72    2.88
   2  10 -13   -1.14    3.02
  -2 -10  14    5.94    3.16
   2  10 -14    4.80    3.83
  -2 -10  15   45.87    5.62
  -2 -10  16   16.03    3.82
  -2  -9   1  136.03   10.55
   2   9  -1  129.25    9.48
   2   9  -1  123.92   10.46
  -2  -9   2  538.63   35.41
  -2  -9   3  205.53   14.39
  -2  -9   3  226.46   17.92
   2   9  -3  226.97   15.99
   2   9  -3  235.31   19.12
  -2  -9   4    0.57    1.71
  -2  -9   4    2.34    2.36
   2   9  -4    3.01    1.60
   2   9  -4    3.76    2.65
  -2  -9   5  214.93   16.77
   2   9  -5  226.21   16.25
  -2  -9   6  274.63   19.56
  -2  -9   6  306.42   24.28
   2   9  -6  263.18   18.03
  -2  -9   7  111.69    9.49
  -2  -9   7  124.97   10.75
   2   9  -7  110.70    9.21
  -2  -9   8    9.47    2.99
  -2  -9   8   14.59    3.14
  -2  -9   9  164.33   13.53
   2   9  -9  160.29   12.96
  -2  -9  10  132.60   11.06
  -2  -9  10  162.47   13.81
   2   9 -10  146.87   12.45
  -2  -9  11    3.09    2.63
  -2  -9  11    5.29    2.84
   2   9 -11    2.89    2.56
  -2  -9  12   19.54    4.00
  -2  -9  12   19.84    3.54
   2   9 -12   18.32    4.27
  -2  -9  13   30.98    5.02
   2   9 -13   33.36    5.81
  -2  -9  14   34.32    5.43
  -2  -9  14   43.67    5.42
   2   9 -14   38.57    6.65
  -2  -9  15    5.92    3.02
   2   9 -15    6.82    3.73
  -2  -9  16   24.17    4.24
   2   9 -16   29.44    7.03
  -2  -9  17   41.64    5.15
  -2  -8   1 1067.55   67.54
  -2  -8   1 1113.30   82.84
   2   8  -1 1047.63   65.34
   2   8  -1 1055.02   76.74
  -2  -8   2   45.26    4.37
  -2  -8   2   55.63    5.66
   2   8  -2   50.24    4.50
   2   8  -2   63.62    6.68
  -2  -8   3  286.82   19.57
  -2  -8   3  283.24   21.44
   2   8  -3  308.64   21.22
   2   8  -3  286.23   22.06
  -2  -8   4  569.41   36.72
  -2  -8   4  610.42   45.91
   2   8  -4  579.95   43.38
  -2  -8   5  172.29   12.83
  -2  -8   5  186.37   15.16
   2   8  -5  163.91   11.72
   2   8  -5  172.92   14.49
  -2  -8   6    1.38    1.73
  -2  -8   6    3.07    2.29
   2   8  -6    0.48    1.36
  -2  -8   7  245.43   17.56
  -2  -8   7  257.46   20.15
   2   8  -7  249.80   17.66
  -2  -8   8  451.45   30.47
  -2  -8   8  451.55   33.47
   2   8  -8  476.77   32.61
  -2  -8   9   58.56    6.12
  -2  -8   9   81.28    7.93
   2   8  -9   60.33    6.22
  -2  -8  10    8.86    2.92
  -2  -8  10   10.87    3.16
   2   8 -10    4.98    2.39
  -2  -8  11   46.57    5.51
  -2  -8  11   57.46    6.29
   2   8 -11   58.50    6.70
  -2  -8  12   75.20    7.61
  -2  -8  12   91.24    8.79
   2   8 -12   71.79    7.66
  -2  -8  13   32.45    4.84
  -2  -8  13   44.00    5.46
   2   8 -13   33.36    5.31
  -2  -8  14   10.23    3.12
  -2  -8  14   17.47    4.01
   2   8 -14   22.91    5.03
  -2  -8  15   64.46    7.14
  -2  -8  15   77.56    8.06
   2   8 -15   58.10    8.07
  -2  -8  16   44.73    5.80
   2   8 -16   38.21    6.77
  -2  -8  18   18.97    4.18
  -2  -7   1    6.65    2.52
   2   7  -1   11.81    1.82
  -2  -7   2  663.65   41.48
  -2  -7   2  688.97   50.46
   2   7  -2  710.00   45.65
   2   7  -2  715.08   53.47
  -2  -7   3  790.69   49.24
  -2  -7   3  867.52   64.61
   2   7  -3  811.40   50.85
   2   7  -3  860.97   64.50
  -2  -7   4  289.87   19.62
  -2  -7   4  305.55   23.44
   2   7  -4  283.99   18.76
   2   7  -4  300.37   23.41
  -2  -7   5    6.37    1.84
  -2  -7   5    4.65    2.10
   2   7  -5    6.14    1.63
   2   7  -5    5.24    2.33
  -2  -7   6  554.00   36.27
  -2  -7   6  556.42   41.06
   2   7  -6  564.07   36.97
  -2  -7   7  179.39   13.32
   2   7  -7  181.91   13.36
  -2  -7   8   41.77    4.83
   2   7  -8   43.04    4.73
  -2  -7   9   93.32    8.21
  -2  -7   9   91.36    8.20
   2   7  -9   94.00    8.27
  -2  -7  10  167.26   12.83
  -2  -7  10  178.39   14.54
   2   7 -10  171.23   13.31
  -2  -7  11   63.01    6.46
  -2  -7  11   80.87    7.98
   2   7 -11   68.33    6.98
  -2  -7  12   -0.12    1.72
   2   7 -12   -0.78    1.84
  -2  -7  13   73.22    7.30
  -2  -7  13   80.61    8.07
   2   7 -13   73.02    7.90
  -2  -7  14   80.31    8.08
   2   7 -14   70.39    7.98
  -2  -7  15   32.27    5.12
   2   7 -15   29.15    5.47
  -2  -7  16    0.46    3.16
  -2  -7  17   15.17    4.10
   2   7 -17    8.59    4.31
  -2  -7  18   33.25    5.46
  -2  -7  19    3.21    3.24
  -2  -6   1  767.21   46.09
  -2  -6   1  818.84   59.34
   2   6  -1  880.43   57.06
   2   6  -1  888.07   66.51
  -2  -6   2  306.29   19.29
  -2  -6   2  324.89   24.11
   2   6  -2  347.93   23.23
   2   6  -2  353.87   27.39
  -2  -6   3   53.23    5.02
   2   6  -3   44.81    3.82
   2   6  -3   63.16    6.39
  -2  -6   4  212.37   14.67
  -2  -6   4  205.73   15.60
   2   6  -4  223.09   15.52
  -2  -6   5  647.43   40.59
  -2  -6   5  686.86   50.63
   2   6  -5  713.77   46.81
  -2  -6   6   84.52    6.86
  -2  -6   6  105.10    9.28
   2   6  -6   88.64    7.15
  -2  -6   7  161.56   12.13
  -2  -6   7  160.31   12.74
  -2  -6   8  183.62   14.87
   2   6  -8  170.87   12.53
  -2  -6   9  249.46   20.33
   2   6  -9  200.21   14.07
  -2  -6  10   25.49    3.91
  -2  -6  10   36.93    4.81
   2   6 -10   26.80    3.76
  -2  -6  11   62.06    6.32
   2   6 -11   56.03    6.04
  -2  -6  12  140.54   12.24
   2   6 -12  124.29   10.52
  -2  -6  13   57.64    6.54
   2   6 -13   53.86    6.31
  -2  -6  14    2.12    3.25
   2   6 -14    2.54    2.33
  -2  -6  15   13.91    3.95
   2   6 -15   14.71    4.05
  -2  -6  16   31.39    4.96
   2   6 -16   33.09    6.11
  -2  -6  17   12.55    3.74
   2   6 -17   10.17    4.06
  -2  -6  18    3.71    3.44
   2   6 -18   -0.01    3.44
  -2  -6  19   19.88    4.72
  -2  -6  20   23.52    4.85
  -2  -5   1   29.90    2.81
  -2  -5   1   33.92    3.59
   2   5  -1   29.65    2.69
   2   5  -1   28.83    2.93
  -2  -5   2   21.26    2.31
  -2  -5   2   20.96    2.60
   2   5  -2   24.62    2.51
   2   5  -2   26.74    3.34
  -2  -5   3  496.32   31.42
   2   5  -3  532.07   34.63
   2   5  -3  511.43   37.84
  -2  -5   4  904.72   66.83
   2   5  -4  851.46   52.94
   2   5  -4  875.26   64.74
  -2  -5   5    6.77    1.64
  -2  -5   5    3.66    1.91
   2   5  -5    6.74    1.53
  -2  -5   6  308.11   23.21
   2   5  -6  317.96   21.50
  -2  -5   7  165.48   12.80
   2   5  -7  186.25   13.70
  -2  -5   8  148.93   12.23
  -2  -5   9   34.02    4.38
   2   5  -9   37.09    4.29
   2   5 -10  297.07   20.88
  -2  -5  11  288.02   22.62
   2   5 -11  277.57   19.73
  -2  -5  12    5.36    2.77
  -2  -5  13   28.79    4.32
   2   5 -13   30.38    4.51
  -2  -5  14   54.40    6.14
   2   5 -14   51.93    6.29
  -2  -5  15   35.43    5.18
   2   5 -15   32.68    5.71
  -2  -5  16   10.66    4.06
   2   5 -16    5.79    3.24
  -2  -5  17   28.75    5.19
   2   5 -17   27.48    5.69
  -2  -5  18   37.53    6.01
   2   5 -18   38.70    6.94
  -2  -5  19   11.83    4.33
   2   5 -19    2.35    4.21
  -2  -5  21    6.44    3.91
  -2  -4   1  568.38   41.68
   2   4  -1  522.65   31.44
   2   4  -1  619.44   46.87
  -2  -4   2  940.98   53.49
  -2  -4   2 1218.86   92.02
   2   4  -2 1073.12   66.67
   2   4  -2 1252.05   95.64
  -2  -4   3   51.54    4.02
  -2  -4   3   69.12    5.99
   2   4  -3   73.82    6.66
  -2  -4   4  229.78   15.60
  -2  -4   4  227.81   17.11
   2   4  -4  220.22   14.44
   2   4  -4  236.59   18.72
  -2  -4   5  708.68   45.81
   2   4  -5  674.28   42.34
  -2  -4   6  197.74   13.92
   2   4  -6  196.26   13.59
  -2  -4   7   21.22    3.28
   2   4  -7   18.20    2.57
  -2  -4   8   76.22    6.91
   2   4  -8   82.08    6.99
  -2  -4   9  241.11   18.89
   2   4  -9  239.58   16.99
  -2  -4  10   10.15    3.03
   2   4 -10    6.05    1.96
  -2  -4  11   96.19    8.94
   2   4 -11   91.33    8.01
  -2  -4  12  107.21    9.77
   2   4 -12   99.93    8.82
  -2  -4  13   67.76    6.46
  -2  -4  13   83.35    8.45
   2   4 -13   64.42    6.77
  -2  -4  14   26.21    4.62
   2   4 -14   17.89    3.78
  -2  -4  15    4.97    2.11
  -2  -4  15    3.30    3.13
   2   4 -15    4.91    2.70
  -2  -4  16   72.55    7.82
   2   4 -16   67.70    8.00
  -2  -4  17   61.09    7.21
   2   4 -17   56.09    7.52
  -2  -4  19   14.02    4.47
   2   4 -19    8.34    4.38
  -2  -4  20    5.15    3.60
  -2  -4  21   12.18    4.50
  -2  -3   1  799.33   50.35
  -2  -3   1  820.63   60.31
   2   3  -1  756.07   45.99
  -2  -3   2   74.12    5.40
  -2  -3   2   71.78    5.72
   2   3  -2   71.69    5.11
  -2  -3   3 1027.87   65.12
  -2  -3   3  895.57   60.94
   2   3  -3 1087.68   70.71
   2   3  -3 1044.57   77.23
  -2  -3   4  403.35   25.92
  -2  -3   4  438.87   33.26
   2   3  -4  384.15   23.96
  -2  -3   5    2.81    1.04
  -2  -3   5    6.20    1.79
   2   3  -5    3.35    1.04
  -2  -3   6   92.04    6.91
   2   3  -6   97.12    7.40
  -2  -3   7  343.38   22.05
  -2  -3   7  344.57   25.38
   2   3  -7  410.48   28.52
  -2  -3   8  245.21   16.33
  -2  -3   8  261.29   20.24
   2   3  -8  271.69   19.06
  -2  -3   9    7.77    1.81
  -2  -3   9    8.02    2.34
   2   3  -9   10.43    2.17
  -2  -3  10  163.39   12.37
  -2  -3  10  143.68   11.57
   2   3 -10  156.59   11.98
  -2  -3  11   99.91    8.98
   2   3 -11   98.89    8.45
  -2  -3  12   48.26    4.76
  -2  -3  12   57.78    6.24
   2   3 -12   55.75    5.92
  -2  -3  13   16.00    2.86
  -2  -3  13   13.78    3.21
   2   3 -13   14.41    3.20
  -2  -3  14   75.11    6.88
  -2  -3  14   72.85    7.40
   2   3 -14   70.65    7.39
  -2  -3  15  153.98   12.14
  -2  -3  15  149.97   13.07
   2   3 -15  142.87   12.17
  -2  -3  16   13.58    2.97
  -2  -3  16   16.63    3.90
   2   3 -16   10.38    3.30
  -2  -3  17    6.00    3.32
   2   3 -17    2.57    3.04
  -2  -3  18   18.18    4.19
   2   3 -18   13.91    4.12
  -2  -3  19   46.97    6.56
   2   3 -19   40.80    6.70
   2   3 -19   36.08    7.11
  -2  -3  20   10.88    4.06
   2   3 -20   13.38    4.97
  -2  -3  21    5.39    3.95
  -2  -3  22   23.34    5.08
  -2  -2   1  450.44   32.53
   2   2  -1  443.47   27.42
   2   2  -1  476.31   35.26
  -2  -2   2 1233.83   77.45
  -2  -2   2 1256.12   91.80
   2   2  -2 1189.60   72.94
   2   2  -2 1202.94   86.43
  -2  -2   3  714.27   45.63
  -2  -2   3  700.08   51.00
   2   2  -3  673.21   41.60
  -2  -2   4   10.00    1.40
  -2  -2   4    7.12    1.53
   2   2  -4    9.44    1.37
  -2  -2   5  646.63   41.64
  -2  -2   5  625.26   45.62
   2   2  -5  628.20   39.70
  -2  -2   6  487.67   31.42
  -2  -2   6  484.49   35.96
   2   2  -6  484.32   31.12
  -2  -2   7  520.38   39.90
   2   2  -7  472.76   29.99
  -2  -2   8   45.09    3.94
   2   2  -8   59.04    5.44
  -2  -2   9  197.65   14.01
  -2  -2   9  173.66   13.98
   2   2  -9  198.82   14.46
  -2  -2  10  161.91   11.47
   2   2 -10  171.06   12.98
  -2  -2  11    4.78    1.54
   2   2 -11    6.20    2.03
  -2  -2  12   83.91    7.05
  -2  -2  12   85.20    8.32
   2   2 -12   79.76    7.29
  -2  -2  13  195.35   14.38
  -2  -2  13  185.70   15.78
   2   2 -13  181.85   13.96
  -2  -2  14  189.81   14.17
  -2  -2  14  174.10   14.59
  -2  -2  15    0.56    1.75
  -2  -2  15   -1.49    2.57
   2   2 -15    1.25    2.00
  -2  -2  16   53.59    5.68
  -2  -2  16   54.29    6.48
   2   2 -16   49.38    6.28
  -2  -2  17   85.04    7.83
  -2  -2  17   84.02    8.60
  -2  -2  18   30.25    4.83
   2   2 -18   32.67    5.77
   2   2 -18   30.73    5.94
  -2  -2  19    0.61    3.19
   2   2 -19   -0.09    3.13
   2   2 -19    4.17    4.00
  -2  -2  20   49.89    6.81
   2   2 -20   38.85    7.11
  -2  -2  21   26.95    4.89
  -2  -2  22    0.92    3.54
  -2  -1   1 1221.57   75.25
  -2  -1   1 1351.07  100.29
   2   1  -1 1183.19   71.26
   2   1  -1 1247.92   89.98
   2   1  -2  371.68   23.47
  -2  -1   3  149.88    9.65
  -2  -1   3  156.05   11.65
   2   1  -3  165.66   11.16
  -2  -1   4  713.10   44.44
  -2  -1   4  733.64   55.72
   2   1  -4  729.06   45.97
  -2  -1   5  698.72   44.22
   2   1  -5  686.80   43.25
  -2  -1   6    0.72    0.61
  -2  -1   7  492.07   31.80
   2   1  -7  481.51   30.90
   2   1  -8  292.44   19.63
  -2  -1   9  100.96    7.44
   2   1  -9  108.14    8.58
  -2  -1  10    2.04    1.22
   2   1 -10    0.84    1.31
  -2  -1  11   28.44    3.22
   2   1 -11   33.53    4.16
  -2  -1  12  177.20   12.70
   2   1 -12  179.72   13.75
  -2  -1  13   25.63    3.29
   2   1 -13   27.70    4.05
  -2  -1  14   66.68    6.13
   2   1 -14   60.81    6.62
  -2  -1  15  125.44    9.83
   2   1 -15  129.48   11.44
  -2  -1  16   71.25    6.64
   2   1 -16   71.63    7.85
   2   1 -16   69.52    7.58
  -2  -1  17   20.52    3.48
   2   1 -17   21.34    4.60
   2   1 -17   17.71    4.10
   2   1 -18   34.77    5.92
   2   1 -18   30.92    5.61
  -2  -1  19   62.95    7.19
   2   1 -19   63.86    8.15
   2   1 -19   70.16    8.75
  -2  -1  20   27.70    4.92
   2   1 -20   25.03    5.62
   2   1 -20   27.20    6.30
  -2  -1  21    0.91    3.27
  -2  -1  21    1.74    2.95
  -2   0   1  504.55   31.50
  -2   0   2  154.76    9.92
   2   0  -2  157.34   10.17
   2   0  -3 1410.78   87.85
  -2   0   4   67.73    4.79
   2   0  -4   67.64    4.87
  -2   0   5  285.03   18.34
   2   0  -5  288.64   18.80
  -2   0   6 1062.81   65.39
   2   0  -6 1143.44   73.42
  -2   0   7   21.76    2.17
   2   0  -7   27.59    2.89
  -2   0   8    2.81    0.96
   2   0  -8    3.88    1.26
  -2   0   9  106.40    7.71
   2   0  -9  113.60    8.77
  -2   0  10  173.07   12.08
   2   0 -10  173.37   12.64
  -2   0  11  162.88   11.59
   2   0 -11  157.54   11.85
  -2   0  12   19.07    2.60
   2   0 -12   21.71    3.38
  -2   0  13  129.79    9.72
   2   0 -13  137.49   11.35
  -2   0  14  126.83    9.76
   2   0 -14  129.93   11.09
   2   0 -14  125.90   10.67
  -2   0  15   16.30    2.85
   2   0 -15   16.74    3.43
   2   0 -16    2.71    2.65
  -2   0  17   60.34    6.13
   2   0 -17   57.19    7.09
   2   0 -17   58.23    6.70
  -2   0  18   84.54    8.04
   2   0 -18   81.02    9.12
   2   0 -18   88.80    9.10
  -2   0  19    3.26    3.63
   2   0 -19    1.86    3.31
  -2   0  20   26.94    5.80
   2   0 -20   17.83    5.59
   2   0 -20   26.82    6.27
  -2   0  21   31.12    5.25
  -2   0  21   34.59    6.92
   2   0 -21   23.19    6.17
  -2   0  22   14.87    4.13
  -2   0  23    2.18    3.44
  -2   1   1  209.98   13.40
  -2   1   1  192.70   13.69
   2  -1  -1  203.19   12.80
   2  -1  -1  204.93   14.95
  -2   1   2 2556.27  161.84
  -2   1   2 2511.33  181.93
   2  -1  -2 2366.77  142.83
  -2   1   3  346.91   22.95
  -2   1   3  288.10   20.74
   2  -1  -3  313.40   19.75
  -2   1   4 1770.80  114.45
  -2   1   4 1646.33  118.95
   2  -1  -4 1555.89   93.17
  -2   1   5  372.57   24.16
   2  -1  -5  346.05   21.66
  -2   1   6   43.33    3.46
   2  -1  -6   39.47    3.27
  -2   1   7    3.12    0.91
  -2   1   8  599.41   38.44
   2  -1  -8  585.51   37.36
  -2   1   9  562.45   36.22
   2  -1  -9  551.39   35.51
  -2   1  10  136.41    9.72
   2  -1 -10  134.34   10.07
  -2   1  11   89.29    6.76
   2  -1 -11  102.81    8.63
   2  -1 -11   89.76    7.16
  -2   1  12  180.13   12.88
   2  -1 -12  181.68   13.79
   2  -1 -12  166.92   11.99
   2  -1 -13   18.73    3.34
  -2   1  14    9.64    2.18
   2  -1 -14   10.14    2.68
   2  -1 -14    9.41    2.47
  -2   1  15   82.86    7.27
  -2   1  15   72.06    7.92
   2  -1 -15   77.87    7.99
   2  -1 -15   81.01    7.50
  -2   1  16  113.27    9.11
  -2   1  16  112.04   11.24
   2  -1 -16  119.22   11.04
   2  -1 -16  127.11   10.91
  -2   1  17   56.24    5.82
  -2   1  17   53.42    7.22
   2  -1 -17   66.15    8.01
  -2   1  18   15.18    3.18
  -2   1  18   16.92    5.23
   2  -1 -18   11.87    3.78
  -2   1  19   82.74   10.22
   2  -1 -19   92.63   10.32
   2  -1 -20   60.55    8.35
   2  -1 -20   56.81    7.72
  -2   1  21    9.28    5.60
   2  -1 -21    5.31    3.74
  -2   1  23   29.49    5.20
  -2   2   1  479.86   31.25
  -2   2   1  457.67   28.94
  -2   2   1  428.30   30.50
   2  -2  -1  475.89   30.65
   2  -2  -1  403.00   23.25
   2  -2  -1  448.18   32.50
  -2   2   2 1475.16   93.46
  -2   2   2 1581.54  118.31
   2  -2  -2 1486.69   94.68
   2  -2  -2 1285.41   74.04
   2  -2  -2 1381.93   98.77
  -2   2   3 1098.45   72.95
  -2   2   3  999.13   73.77
   2  -2  -3  998.11   63.68
   2  -2  -3  981.17   61.85
   2  -2  -3  788.87   51.65
   2  -2  -4  184.06   11.90
  -2   2   5   39.09    3.11
  -2   2   5   33.55    4.96
   2  -2  -5   37.08    2.93
   2  -2  -5   36.12    2.71
  -2   2   6  204.20   13.91
  -2   2   6  175.51   14.21
   2  -2  -6  192.49   12.92
   2  -2  -6  182.16   11.68
  -2   2   7  611.38   40.33
  -2   2   7  509.04   36.43
   2  -2  -7  578.40   37.31
   2  -2  -7  562.60   35.62
  -2   2   8  339.10   22.62
  -2   2   8  307.08   23.42
   2  -2  -8  330.81   21.99
   2  -2  -8  310.22   19.70
  -2   2   9   61.86    6.22
   2  -2  -9   70.60    5.86
  -2   2  10  369.62   27.88
   2  -2 -10  423.53   28.77
   2  -2 -10  393.18   25.55
  -2   2  11  348.26   23.58
  -2   2  11  317.02   24.61
   2  -2 -11  350.46   24.19
   2  -2 -11  320.43   20.77
  -2   2  12   12.31    2.14
   2  -2 -12   13.62    2.34
  -2   2  13   49.76    4.78
  -2   2  13   44.41    5.92
   2  -2 -13   51.35    5.56
   2  -2 -13   48.54    4.71
  -2   2  14   86.77    7.33
  -2   2  14   80.18    8.90
   2  -2 -14   81.61    7.75
   2  -2 -14   81.83    7.02
  -2   2  15  121.41    9.74
  -2   2  15  108.33   11.03
  -2   2  16    1.79    1.69
  -2   2  16    4.01    3.62
   2  -2 -16    2.77    2.64
   2  -2 -16    3.62    2.28
  -2   2  17  158.61   12.45
   2  -2 -17  160.94   13.92
   2  -2 -17  166.82   13.29
  -2   2  18  119.84   10.19
  -2   2  18  119.44   14.19
   2  -2 -18  119.67   11.57
   2  -2 -18  119.68   10.39
  -2   2  19   11.76    5.85
   2  -2 -19    9.98    3.76
   2  -2 -19    7.48    3.70
  -2   2  20    0.89    5.49
   2  -2 -20    2.81    3.10
   2  -2 -20   -0.82    2.97
  -2   2  21   27.42    8.07
   2  -2 -21   36.93    7.24
  -2   2  22   36.20    9.19
   2  -2 -22   36.00    7.74
   2  -3  -1 1105.25   67.34
   2  -3  -1 1174.59   85.85
  -2   3   2  197.70   13.08
  -2   3   2  197.17   12.58
   2  -3  -2  198.43   12.97
   2  -3  -2  175.07   10.35
   2  -3  -2  192.82   14.78
  -2   3   3   10.90    1.54
  -2   3   3   10.28    0.99
  -2   3   3   13.96    1.99
   2  -3  -3    8.96    0.94
   2  -3  -3    9.37    0.76
  -2   3   4  111.95    8.05
   2  -3  -4  106.99    7.11
   2  -3  -4   97.78    8.91
  -2   3   5  230.30   15.24
   2  -3  -5  233.81   15.24
   2  -3  -5  223.50   14.01
   2  -3  -5  225.18   17.25
  -2   3   6  308.17   24.70
   2  -3  -6  364.55   24.19
   2  -3  -6  342.69   21.85
  -2   3   7    1.16    0.94
  -2   3   7    0.38    5.28
   2  -3  -7    0.56    0.71
   2  -3  -7    0.30    0.58
  -2   3   8  331.48   22.79
  -2   3   8  274.62   22.76
   2  -3  -8  300.00   19.80
   2  -3  -8  285.10   17.92
  -2   3   9  471.71   34.93
   2  -3  -9  611.50   41.87
  -2   3  10   56.30    4.76
  -2   3  10   57.72    7.70
   2  -3 -10   59.98    5.29
   2  -3 -10   60.14    4.76
  -2   3  11   42.23    4.09
  -2   3  11   36.81    6.32
   2  -3 -11   46.46    4.73
   2  -3 -11   41.37    3.68
  -2   3  12  181.68   12.65
   2  -3 -12  195.67   13.85
  -2   3  13  361.64   24.00
  -2   3  13  366.95   30.25
   2  -3 -13  396.19   27.97
   2  -3 -13  361.95   23.71
  -2   3  14   74.28    6.40
  -2   3  14   80.88   10.15
   2  -3 -14   83.39    7.87
   2  -3 -14   88.16    7.37
  -2   3  15   32.88    4.08
  -2   3  15   26.04    6.57
   2  -3 -15   33.12    4.94
   2  -3 -15   30.12    3.87
  -2   3  16  273.72   19.09
  -2   3  16  275.13   24.64
   2  -3 -16  313.13   23.88
   2  -3 -16  291.93   20.47
  -2   3  17   15.67    3.34
   2  -3 -17   20.54    4.39
   2  -3 -17   17.20    3.56
  -2   3  18    3.35    2.29
   2  -3 -18    0.42    2.16
   2  -3 -18    0.92    2.21
  -2   3  19   50.20   10.82
   2  -3 -19   62.80    8.13
   2  -3 -19   61.36    6.83
  -2   3  20   31.27   10.94
   2  -3 -20   27.36    5.77
   2  -3 -20   26.03    4.99
  -2   3  21   22.50   10.54
   2  -3 -21   24.38    5.94
   2  -3 -21   19.30    4.86
  -2   3  22    7.84    9.18
   2  -3 -22    7.78    4.85
  -2   4   1 1225.46   90.36
   2  -4  -1 1170.28   72.63
   2  -4  -1 1119.83   79.23
  -2   4   2  108.84    6.43
  -2   4   2  146.33   11.84
   2  -4  -2  120.46    8.21
   2  -4  -2  112.04    6.95
   2  -4  -2  143.25   11.91
  -2   4   3  507.61   30.87
  -2   4   3  567.22   42.46
   2  -4  -3  533.20   33.85
   2  -4  -3  520.74   39.05
  -2   4   4  227.57   14.72
  -2   4   4  227.39   14.12
  -2   4   4  339.88   28.04
   2  -4  -4  237.12   15.23
   2  -4  -4  222.40   13.40
  -2   4   5   11.08    2.48
   2  -4  -5    9.18    1.14
   2  -4  -5   11.17    1.06
   2  -4  -5   10.03    3.63
  -2   4   6  251.93   17.48
  -2   4   6  242.87   19.83
   2  -4  -6  238.79   15.66
   2  -4  -6  232.29   14.66
   2  -4  -6  209.76   15.98
  -2   4   7  974.03   63.59
   2  -4  -7  965.76   62.24
   2  -4  -7  897.30   55.20
   2  -4  -7  853.22   61.33
  -2   4   8  158.35   11.03
  -2   4   8  158.90   16.53
   2  -4  -8  175.80   12.30
   2  -4  -8  169.42   11.19
  -2   4   9    9.07    2.00
  -2   4  10  177.48   12.64
  -2   4  10  166.67   18.70
   2  -4 -10  198.24   14.41
   2  -4 -10  176.70   11.65
  -2   4  11  333.98   22.95
   2  -4 -11  335.91   23.15
   2  -4 -11  305.24   19.19
  -2   4  12  282.53   19.51
   2  -4 -12  279.76   18.39
  -2   4  13    4.92    1.84
  -2   4  13    4.43    8.05
   2  -4 -13    6.06    2.20
   2  -4 -13    4.61    1.61
  -2   4  14  201.52   14.73
  -2   4  14  203.82   22.00
   2  -4 -14  210.10   15.82
   2  -4 -14  206.28   14.26
  -2   4  15  116.96    9.61
  -2   4  15  117.15   16.06
   2  -4 -15  129.42   11.26
   2  -4 -15  122.87    9.31
  -2   4  16    6.50    2.49
  -2   4  16    9.83   10.20
   2  -4 -16    5.33    2.83
   2  -4 -16    4.30    2.13
   2  -4 -17   27.36    4.86
  -2   4  18  106.16   10.29
  -2   4  18  120.80   20.04
   2  -4 -18   90.65    9.42
   2  -4 -18  101.92    8.69
  -2   4  19   48.81   15.30
   2  -4 -19   46.76    7.01
   2  -4 -19   37.88    5.15
  -2   4  20    4.36   12.72
   2  -4 -20    1.39    2.77
   2  -4 -20    0.87    2.72
  -2   4  21   43.24   17.70
   2  -4 -21   41.09    7.20
   2  -4 -21   40.25    6.20
  -2   4  22   42.08   16.31
   2  -4 -22   35.88    7.21
  -2   5   1  256.56   15.15
  -2   5   1  301.31   23.08
   2  -5  -1  310.44   24.01
  -2   5   2  915.32   55.95
  -2   5   2  908.89   65.03
   2  -5  -2  918.86   57.07
   2  -5  -2 1028.57   77.66
  -2   5   3  296.70   18.58
  -2   5   3  302.05   22.66
   2  -5  -3  286.91   18.39
   2  -5  -3  305.90   19.71
   2  -5  -3  295.52   23.18
  -2   5   4   20.63    1.61
  -2   5   4   26.28    3.08
   2  -5  -4   23.07    2.29
   2  -5  -4   21.25    1.75
   2  -5  -4   23.47    5.90
  -2   5   5  598.67   37.78
  -2   5   5  614.95   38.76
  -2   5   5  648.77   48.78
   2  -5  -5  585.18   45.98
  -2   5   6  746.07   47.27
  -2   5   6  754.86   47.40
  -2   5   6  770.84   56.96
   2  -5  -6  759.07   47.90
   2  -5  -6  784.71   49.65
  -2   5   7  132.11   10.29
  -2   5   7  133.39   12.08
   2  -5  -7  119.10    7.63
   2  -5  -7  118.07   10.48
  -2   5   8  335.45   22.94
  -2   5   8  362.81   29.98
   2  -5  -8  336.90   22.18
   2  -5  -8  309.14   18.79
  -2   5   9  473.71   37.78
   2  -5  -9  508.95   33.38
  -2   5  10  170.28   12.52
  -2   5  10  174.73   19.84
   2  -5 -10  192.59   13.95
   2  -5 -10  165.50   10.67
  -2   5  11   35.98    4.21
   2  -5 -11   36.30    3.89
   2  -5 -11   32.89    2.92
  -2   5  12  263.10   19.31
  -2   5  12  201.72   22.25
   2  -5 -12  251.64   16.89
  -2   5  13  344.23   23.61
   2  -5 -13  366.83   25.64
   2  -5 -13  350.05   22.72
  -2   5  14  107.64    9.32
  -2   5  14  109.94   19.39
   2  -5 -14  122.89   10.56
   2  -5 -14  107.80    7.88
  -2   5  15   11.96    3.03
  -2   5  15   19.93   15.16
   2  -5 -15    9.64    3.04
   2  -5 -15   10.72    2.26
  -2   5  16   60.13    6.74
  -2   5  16   66.05   19.27
   2  -5 -16   65.02    5.83
   2  -5 -17  102.84   10.02
  -2   5  18    2.27    2.59
  -2   5  18   -3.55   18.44
   2  -5 -18    5.37    3.12
   2  -5 -18    3.23    2.41
  -2   5  19    7.45    3.70
  -2   5  19    8.06   19.92
   2  -5 -19   10.05    3.90
   2  -5 -19    2.63    2.75
  -2   5  20  106.51   26.64
   2  -5 -20   80.91    9.39
   2  -5 -20   88.30    8.52
  -2   5  21   42.53   21.70
   2  -5 -21   34.96    6.59
   2  -5 -21   42.28    6.05
  -2   5  22   -0.74   16.84
   2  -5 -22    1.32    3.56
  -2   6   1  341.23   21.18
  -2   6   1  342.38   25.45
   2  -6  -1  365.11   23.81
   2  -6  -1  355.53   26.84
  -2   6   2   90.75    5.67
  -2   6   2  110.99    9.47
   2  -6  -2   95.35    6.68
   2  -6  -2  102.57    7.29
  -2   6   3  112.36    7.17
   2  -6  -3  121.44    9.01
   2  -6  -3  111.61    7.53
  -2   6   4  790.23   48.97
  -2   6   4  871.33   65.61
   2  -6  -4  763.44   47.12
   2  -6  -4  792.22   49.47
  -2   6   5  483.81   30.46
  -2   6   5  473.02   34.61
   2  -6  -5  490.41   31.72
   2  -6  -5  485.58   30.63
  -2   6   6    8.85    2.22
   2  -6  -6    6.60    1.36
   2  -6  -6    4.68    0.89
  -2   6   7  553.87   37.37
  -2   6   7  450.78   31.61
   2  -6  -7  574.77   38.87
   2  -6  -7  520.98   33.05
   2  -6  -7  485.58   37.36
  -2   6   8  458.02   29.99
  -2   6   8  492.32   32.90
  -2   6   8  447.10   33.24
   2  -6  -8  497.10   32.84
   2  -6  -8  480.86   30.61
   2  -6  -8  454.83   34.71
  -2   6   9   93.73    9.86
   2  -6  -9   92.53    6.99
   2  -6  -9   89.47    8.62
  -2   6  10   70.00    6.92
   2  -6 -10   70.82    5.91
   2  -6 -10   64.00    4.58
  -2   6  11  621.26   41.98
  -2   6  11  679.79   55.55
   2  -6 -11  612.11   39.98
   2  -6 -11  556.34   33.24
  -2   6  12  308.05   22.42
   2  -6 -12  296.34   19.10
  -2   6  13   11.69    3.17
  -2   6  13   10.61    9.76
   2  -6 -13    3.71    1.95
   2  -6 -13    5.46    1.59
  -2   6  14  213.82   16.42
   2  -6 -14  232.91   17.57
   2  -6 -14  210.78   14.06
  -2   6  15  165.75   14.09
  -2   6  15  154.97   22.93
   2  -6 -15  177.78   14.50
   2  -6 -15  160.27   11.21
  -2   6  16   89.87    9.33
  -2   6  16   67.81   18.74
   2  -6 -16   91.60    7.43
  -2   6  17   11.97   17.15
   2  -6 -17    8.09    3.13
  -2   6  18   55.89    7.92
  -2   6  18   52.40   21.15
   2  -6 -18   53.35    7.00
   2  -6 -18   48.92    5.23
  -2   6  19   69.96    9.42
  -2   6  19   43.67   21.70
   2  -6 -19   73.66    8.73
   2  -6 -19   79.92    7.68
  -2   6  20   -4.28   17.76
   2  -6 -20    2.71    3.01
   2  -6 -20   -0.14    2.61
  -2   6  21   21.14   18.39
   2  -6 -21   15.48    5.17
   2  -6 -21   15.87    4.28
   2  -6 -22   27.67    6.61
  -2   7   1   69.41    4.70
   2  -7  -1   74.65    5.65
   2  -7  -1   89.87    8.38
  -2   7   2  791.12   47.76
  -2   7   2  793.71   56.74
   2  -7  -2  829.72   53.64
   2  -7  -2  866.35   55.54
   2  -7  -2  915.71   69.64
  -2   7   3  868.18   54.74
  -2   7   3  790.17   55.82
   2  -7  -3  893.73   67.76
  -2   7   4  166.90   11.05
  -2   7   4  157.47   12.37
   2  -7  -4  154.97   11.09
   2  -7  -4  148.42    9.74
   2  -7  -4  164.14   15.76
  -2   7   5  351.50   22.11
  -2   7   5  364.85   27.43
  -2   7   6  736.41   53.42
   2  -7  -6  834.36   55.18
   2  -7  -6  686.60   55.82
  -2   7   7   64.01    4.97
  -2   7   7   58.31    5.91
   2  -7  -7   55.48    4.53
   2  -7  -7   65.44    5.04
   2  -7  -7   52.56    9.60
  -2   7   8   31.08    3.46
  -2   7   8   30.74    3.01
   2  -7  -8   33.50    3.39
   2  -7  -8   32.24    2.87
   2  -7  -8   26.98    6.17
  -2   7   9  158.22   12.28
  -2   7   9  148.22   10.74
  -2   7   9  146.64   12.68
   2  -7  -9  148.68   10.60
   2  -7  -9  144.27    9.60
   2  -7  -9  137.48   12.51
  -2   7  10  601.15   41.51
  -2   7  10  500.69   36.40
   2  -7 -10  610.04   41.10
   2  -7 -10  557.85   35.35
   2  -7 -10  518.69   38.97
  -2   7  11   26.35    4.09
  -2   7  11   28.95    6.02
   2  -7 -11   33.30    3.72
   2  -7 -11   33.98    3.09
  -2   7  12  163.62   13.74
  -2   7  12  185.05   17.82
   2  -7 -12  152.06   10.02
  -2   7  13  326.93   24.94
  -2   7  13  297.67   25.64
   2  -7 -13  328.83   23.14
   2  -7 -13  311.01   20.16
  -2   7  14   77.66    8.70
  -2   7  14   75.12   11.52
   2  -7 -14   80.85    7.59
   2  -7 -14   78.04    6.12
  -2   7  15    5.60    3.34
  -2   7  15   -0.39    7.88
   2  -7 -15    4.63    2.64
   2  -7 -15    3.72    1.78
  -2   7  16   19.74    5.16
   2  -7 -16   18.53    4.06
   2  -7 -16   16.46    2.91
  -2   7  17   92.55   16.74
   2  -7 -17  101.69    9.90
  -2   7  18   25.83    6.19
  -2   7  18   27.56   13.87
   2  -7 -18   29.18    5.11
   2  -7 -18   22.14    3.46
  -2   7  19   33.16   14.62
   2  -7 -19   21.63    4.79
   2  -7 -19   18.28    3.55
   2  -7 -20   34.32    6.26
   2  -7 -20   37.94    5.36
  -2   7  21    6.55   13.32
   2  -7 -21   10.10    4.53
   2  -7 -21    9.78    4.04
  -2   7  22   -2.27    9.24
   2  -7 -22    9.96    4.81
  -2   8   1  947.19   70.18
   2  -8  -1  961.19   61.91
   2  -8  -1  878.14   62.73
  -2   8   2  322.32   20.32
   2  -8  -2  341.89   22.76
  -2   8   3   73.37    7.00
   2  -8  -3   55.00    4.42
   2  -8  -3   84.72    9.29
  -2   8   4  320.46   24.05
   2  -8  -4  333.66   22.10
  -2   8   5  410.94   26.64
  -2   8   5  390.08   29.21
   2  -8  -5  382.16   24.99
   2  -8  -5  385.33   24.74
  -2   8   6   38.97    3.32
  -2   8   6   29.39    3.52
   2  -8  -6   27.46    3.05
   2  -8  -6   36.52    3.50
   2  -8  -6   42.17   12.13
  -2   8   7  125.68    8.88
  -2   8   7  123.28   10.41
   2  -8  -7  119.68    8.86
   2  -8  -7  114.37    7.97
   2  -8  -7  134.78   18.40
  -2   8   8  423.87   27.26
  -2   8   8  432.93   32.80
   2  -8  -8  438.46   28.84
   2  -8  -8  430.61   36.34
  -2   8   9  200.96   14.17
  -2   8   9  185.89   15.02
   2  -8  -9  197.06   13.79
   2  -8  -9  203.84   13.98
   2  -8  -9  182.10   16.86
  -2   8  10   21.99    3.39
  -2   8  10   20.28    3.04
  -2   8  10   25.50    4.59
   2  -8 -10   19.60    2.77
   2  -8 -10   20.33    2.46
   2  -8 -10   17.12    4.47
  -2   8  11  364.72   26.07
  -2   8  11  334.90   26.09
   2  -8 -11  352.35   23.88
   2  -8 -11  358.07   23.70
   2  -8 -11  312.74   24.67
  -2   8  12  210.39   16.39
  -2   8  12  208.27   17.88
   2  -8 -12  214.95   15.54
   2  -8 -12  204.27   13.60
  -2   8  13    4.58    4.96
   2  -8 -13    7.07    2.24
  -2   8  14   25.08    5.16
   2  -8 -14   19.17    3.49
   2  -8 -14   21.47    2.88
  -2   8  15  218.79   18.87
   2  -8 -15  199.48   15.28
   2  -8 -15  197.18   13.51
  -2   8  16  133.97   14.07
  -2   8  16  104.49   12.69
   2  -8 -16  123.29   11.16
   2  -8 -16  118.93    9.09
  -2   8  17    1.15    3.93
  -2   8  17   -1.04    6.46
   2  -8 -17    0.88    2.49
   2  -8 -17    2.78    2.05
  -2   8  18   32.99    7.77
  -2   8  18   25.77    8.51
   2  -8 -18   29.48    5.18
   2  -8 -18   25.33    3.89
  -2   8  19   24.40    9.54
   2  -8 -19   21.29    4.82
   2  -8 -19   22.18    4.14
  -2   8  20   -2.18    8.48
   2  -8 -20   10.68    3.98
   2  -8 -20    7.40    3.49
  -2   8  21    5.52    8.30
   2  -8 -21   -0.59    3.31
   2  -8 -21    3.95    3.76
   2  -8 -22   20.68    6.16
  -2   9   1    0.72    1.04
   2  -9  -1    0.94    1.46
   2  -9  -1    1.71    2.48
  -2   9   2  311.24   19.89
  -2   9   2  328.09   25.61
   2  -9  -2  300.32   19.71
   2  -9  -2  323.85   25.62
  -2   9   3  546.14   34.43
  -2   9   3  518.64   37.56
   2  -9  -3  535.95   34.70
   2  -9  -3  549.25   35.59
   2  -9  -3  596.01   46.97
  -2   9   4   75.15    5.55
  -2   9   4   61.80    6.07
   2  -9  -4   58.08    8.43
  -2   9   5   57.49    4.33
  -2   9   5   56.82    5.79
   2  -9  -5   56.95    5.71
   2  -9  -5   50.67    4.61
   2  -9  -5   62.20   10.66
  -2   9   6  256.31   17.38
   2  -9  -6  222.48   15.23
   2  -9  -6  229.92   25.75
  -2   9   7  412.46   27.42
  -2   9   7  353.35   25.80
   2  -9  -7  369.28   24.09
   2  -9  -7  398.98   26.63
   2  -9  -7  413.97   40.37
  -2   9   8  100.88    7.82
  -2   9   8   85.45    7.75
   2  -9  -8   86.44    6.90
   2  -9  -8   86.69    6.84
   2  -9  -8   97.60   15.15
  -2   9   9  226.42   15.11
  -2   9   9  243.72   19.35
   2  -9  -9  254.76   17.93
   2  -9  -9  236.21   15.98
   2  -9  -9  246.59   23.47
  -2   9  10  540.22   37.13
  -2   9  10  459.46   33.65
   2  -9 -10  485.30   31.51
   2  -9 -10  516.31   34.01
  -2   9  11   74.55    7.63
   2  -9 -11   96.17    7.76
   2  -9 -11   85.36   10.43
  -2   9  12   13.75    3.14
  -2   9  12   14.28    4.12
   2  -9 -12   11.78    2.50
   2  -9 -12   12.58    2.41
   2  -9 -12   16.46    4.48
  -2   9  13  185.84   15.69
  -2   9  13  142.78   12.64
   2  -9 -13  147.05   11.14
   2  -9 -13  157.95   11.44
  -2   9  14  236.48   19.66
   2  -9 -14  192.27   14.28
   2  -9 -14  199.30   13.90
  -2   9  15   24.42    5.56
  -2   9  15   20.38    5.63
   2  -9 -15   21.99    4.04
   2  -9 -15   24.86    3.54
  -2   9  16  146.56   15.25
  -2   9  16  102.02   11.32
   2  -9 -16  112.51   10.39
   2  -9 -16  101.61    8.10
  -2   9  17  136.00   14.79
  -2   9  17  101.29   11.59
   2  -9 -17  118.25   11.05
   2  -9 -17  112.56    9.11
  -2   9  18   22.53    6.86
  -2   9  18   24.64    7.28
   2  -9 -18   19.73    4.60
   2  -9 -18   19.97    3.77
   2  -9 -19    1.41    3.01
   2  -9 -19    0.36    2.90
  -2   9  20   12.03    6.69
  -2   9  21   30.37    7.91
   2  -9 -21   33.84    6.91
   2  -9 -22   10.12    5.42
  -2  10   1  533.11   33.80
  -2  10   1  571.82   44.02
   2 -10  -1  509.15   32.41
   2 -10  -1  570.39   43.84
  -2  10   2  149.48   10.34
  -2  10   2  142.50   12.31
   2 -10  -2  140.53   12.61
  -2  10   3   17.18    2.02
   2 -10  -3   15.08    2.70
  -2  10   4  415.44   27.00
  -2  10   4  391.06   29.53
   2 -10  -4  371.78   24.59
   2 -10  -4  432.34   36.04
  -2  10   5  558.51   37.15
  -2  10   5  483.72   35.79
   2 -10  -5  514.97   35.11
   2 -10  -5  514.69   34.20
   2 -10  -5  440.64   35.57
  -2  10   6  133.82    9.60
  -2  10   6  119.08   10.22
   2 -10  -6  115.67    9.29
   2 -10  -6  112.75    8.67
   2 -10  -6  148.89   24.31
  -2  10   7   35.08    3.28
  -2  10   7   42.49    5.06
  -2  10   8  425.64   28.83
  -2  10   8  376.07   28.12
   2 -10  -8  378.70   24.96
   2 -10  -8  369.25   23.86
   2 -10  -8  489.02   49.96
  -2  10   9  390.64   27.48
  -2  10   9  294.09   21.28
   2 -10  -9  347.03   23.61
   2 -10  -9  358.29   24.58
   2 -10  -9  342.74   31.69
  -2  10  10    1.89    2.69
   2 -10 -10   -0.39    1.89
   2 -10 -10    2.97    6.09
  -2  10  11  135.35   11.08
  -2  10  11  119.99   10.61
   2 -10 -11  132.59   10.39
   2 -10 -11  124.18    9.66
  -2  10  12  223.29   17.96
   2 -10 -12  203.99   14.63
   2 -10 -12  208.71   18.85
  -2  10  13   85.95    8.56
   2 -10 -13   97.98    8.50
   2 -10 -13  104.50    8.87
   2 -10 -13   91.00    9.99
  -2  10  14   26.50    5.21
   2 -10 -14   23.97    3.88
   2 -10 -14   19.38    3.58
  -2  10  15  266.90   22.95
  -2  10  15  193.38   16.49
   2 -10 -15  204.13   15.88
   2 -10 -15  200.53   14.60
  -2  10  16   94.64    9.46
   2 -10 -16  107.18   10.15
  -2  10  17    4.58    4.16
  -2  10  17    5.95    4.51
   2 -10 -17    7.86    3.38
   2 -10 -17    4.77    2.95
  -2  10  18   28.33    7.14
   2 -10 -18   20.63    4.41
  -2  10  19   25.01    5.86
   2 -10 -19   29.65    5.76
   2 -10 -19   27.45    5.47
  -2  10  20   16.57    5.53
   2 -10 -20   15.84    5.04
   2 -10 -20   20.05    5.12
   2 -10 -21   -1.11    3.67
  -2  11   1   18.65    2.69
  -2  11   1   18.10    4.39
   2 -11  -1   16.98    3.23
   2 -11  -1   11.41    3.85
  -2  11   2  142.78    9.83
  -2  11   2  162.90   14.44
   2 -11  -2  142.84   11.17
  -2  11   3  231.16   16.02
  -2  11   3  196.23   15.70
   2 -11  -3  192.16   13.72
   2 -11  -3  214.13   15.83
   2 -11  -3  215.60   19.12
  -2  11   4  210.80   14.45
  -2  11   4  198.19   16.35
   2 -11  -4  177.49   13.21
   2 -11  -4  194.71   14.46
   2 -11  -4  206.71   19.58
  -2  11   5   32.51    3.20
   2 -11  -5   23.69    4.41
   2 -11  -5   23.62    3.74
   2 -11  -5   25.29    8.68
  -2  11   6  261.42   17.78
   2 -11  -6  251.80   18.77
   2 -11  -6  219.83   15.14
   2 -11  -6  276.57   33.49
  -2  11   7  433.20   25.45
   2 -11  -7 1149.92  106.01
  -2  11   8   50.78    4.90
  -2  11   8   32.80    4.49
   2 -11  -8   39.28    4.63
   2 -11  -8   36.96    4.55
   2 -11  -8   42.01   16.51
  -2  11   9   27.50    4.34
   2 -11  -9   20.75    3.75
   2 -11  -9   34.41   12.51
  -2  11  10  114.30    9.57
  -2  11  10   92.56    8.19
   2 -11 -10  100.06    8.21
   2 -11 -10  113.90    9.84
   2 -11 -10  109.10   14.71
  -2  11  11  288.06   21.31
  -2  11  11  241.75   18.58
   2 -11 -11  272.24   19.35
   2 -11 -11  263.80   19.21
   2 -11 -11  286.62   26.23
  -2  11  12   18.15    3.91
  -2  11  12   15.33    3.65
   2 -11 -12   12.67    2.86
   2 -11 -12   16.68    3.73
   2 -11 -12   11.03    5.19
  -2  11  13   99.98    9.74
   2 -11 -13   91.76    8.17
   2 -11 -13  100.12    9.21
   2 -11 -13   80.91    9.66
  -2  11  14  198.24   16.67
   2 -11 -14  212.33   16.53
   2 -11 -14  195.44   14.88
  -2  11  15   32.27    5.38
   2 -11 -15   35.44    5.09
   2 -11 -15   36.64    5.31
  -2  11  16   10.94    4.23
   2 -11 -16   11.66    3.57
   2 -11 -16    9.55    3.77
   2 -11 -17   43.40    6.45
   2 -11 -17   41.18    6.40
  -2  11  18   55.71    7.33
   2 -11 -18   57.37    7.66
   2 -11 -18   48.42    6.89
  -2  11  19   16.14    5.03
   2 -11 -19   15.09    4.71
   2 -11 -19   11.01    4.48
   2 -11 -20    2.14    3.77
   2 -11 -20    0.80    4.01
   2 -11 -21    8.87    5.08
  -2  12   1  115.15    8.58
  -2  12   1  127.72   11.75
   2 -12  -1  119.91   10.36
   2 -12  -1  133.60   13.07
  -2  12   2  179.97   12.60
  -2  12   2  169.61   14.36
   2 -12  -2  181.88   16.25
  -2  12   3   62.03    5.16
  -2  12   3   71.39    8.03
   2 -12  -3   55.11    5.97
   2 -12  -3   55.59    6.27
   2 -12  -3   59.22    8.65
  -2  12   4   51.87    4.44
  -2  12   4   56.31    6.74
   2 -12  -4   46.48    5.99
   2 -12  -4   43.82    5.59
   2 -12  -4   65.06   10.23
  -2  12   5  391.36   26.13
  -2  12   5  361.05   27.83
   2 -12  -5  392.85   29.13
   2 -12  -5  352.49   24.33
   2 -12  -5  346.17   30.95
  -2  12   6  232.42   16.62
  -2  12   6  192.17   15.62
   2 -12  -6  186.96   14.82
   2 -12  -6  192.07   14.63
   2 -12  -6  218.74   28.26
  -2  12   7   -0.81    3.17
   2 -12  -7    0.47    2.29
  -2  12   8  136.35   10.67
  -2  12   8  108.75    9.63
   2 -12  -8  114.61    9.81
   2 -12  -8  109.10    9.56
   2 -12  -8  136.46   24.57
  -2  12   9  182.72   13.98
  -2  12   9  158.59   13.38
   2 -12  -9  159.60   12.35
   2 -12  -9  148.23   11.73
   2 -12  -9  187.28   25.09
  -2  12  10  127.16   10.81
  -2  12  10   99.02    9.09
   2 -12 -10  104.43    8.76
   2 -12 -10  107.66   15.84
  -2  12  11   15.83    3.72
  -2  12  11   19.11    4.01
   2 -12 -11   16.53    3.44
   2 -12 -11   15.92    4.11
   2 -12 -11   10.40    7.59
  -2  12  12  156.29   13.40
  -2  12  12  131.57   11.00
   2 -12 -12  156.04   12.54
   2 -12 -12  159.68   13.65
  -2  12  13   92.47    9.92
  -2  12  13   91.32    8.95
   2 -12 -13   93.04    8.57
   2 -12 -13   95.10    9.68
   2 -12 -13   93.25   11.23
  -2  12  14    0.53    3.04
   2 -12 -14   -0.06    2.14
   2 -12 -14    0.97    3.39
   2 -12 -14    0.46    3.83
   2 -12 -15   30.49    4.92
  -2  12  16   26.47    4.93
   2 -12 -16   33.11    5.53
   2 -12 -16   32.63    6.32
  -2  12  17    7.32    3.80
   2 -12 -17    4.23    4.30
  -2  12  18    0.62    3.98
   2 -12 -18    3.32    3.27
   2 -12 -19   13.90    4.77
   2 -12 -19   14.04    5.43
   2 -12 -20   25.84    6.94
  -2  13   1   76.67    6.82
   2 -13  -1   68.33    7.95
   2 -13  -1   69.11    7.91
  -2  13   2    0.83    1.84
  -2  13   2   -0.75    3.82
   2 -13  -2    1.88    2.43
   2 -13  -2    0.18    2.80
   2 -13  -2    3.85    4.69
  -2  13   3  143.39   10.35
  -2  13   3  152.35   13.83
   2 -13  -3  142.45   12.22
   2 -13  -3  139.13   12.26
   2 -13  -3  149.84   15.02
  -2  13   4  263.79   18.07
  -2  13   4  250.77   20.45
   2 -13  -4  247.33   19.24
   2 -13  -4  252.44   19.43
   2 -13  -4  251.59   23.48
  -2  13   5    4.32    1.86
  -2  13   5    2.87    3.52
   2 -13  -5    5.34    3.54
   2 -13  -5    6.97    3.40
   2 -13  -5    5.55    7.86
  -2  13   6   52.58    5.05
  -2  13   6   39.26    5.59
   2 -13  -6   37.89    6.05
   2 -13  -6   33.96    5.65
   2 -13  -6   43.41   16.60
  -2  13   7  183.14   13.78
   2 -13  -7  157.00   13.12
   2 -13  -7  146.47   12.54
   2 -13  -7  145.02   25.13
  -2  13   8  211.38   15.78
  -2  13   8  160.10   13.02
   2 -13  -8  192.08   15.38
   2 -13  -8  191.28   30.11
  -2  13   9    3.79    3.12
   2 -13  -9    1.31    2.52
   2 -13  -9    4.32    3.43
   2 -13  -9    4.10   13.76
  -2  13  10  206.04   15.77
  -2  13  10  179.14   14.58
   2 -13 -10  203.76   15.72
   2 -13 -10  197.94   16.51
   2 -13 -10  205.86   24.98
  -2  13  11  153.15   13.27
  -2  13  11  112.35   10.09
   2 -13 -11  134.02   11.31
   2 -13 -11  128.44   12.07
   2 -13 -11  146.30   18.53
  -2  13  12   16.47    4.56
   2 -13 -12   13.23    3.63
   2 -13 -12   12.27    4.89
   2 -13 -12   13.21    6.54
  -2  13  13   28.69    6.12
  -2  13  13   25.29    4.70
   2 -13 -13   28.66    4.56
   2 -13 -13   29.23    6.15
   2 -13 -13   25.44    6.68
  -2  13  14   56.16    6.55
   2 -13 -14   56.17    6.88
  -2  13  15   17.22    3.99
   2 -13 -15   19.04    4.46
   2 -13 -15   14.30    5.87
  -2  13  16    1.67    2.97
   2 -13 -16   -0.10    2.93
   2 -13 -16    1.47    4.32
   2 -13 -17   12.24    4.32
   2 -13 -17    6.00    5.03
   2 -13 -18   34.63    6.49
   2 -13 -18   23.78    6.43
   2 -13 -19   11.13    5.60
   2 -13 -19    3.87    4.58
  -2  14   1   69.11    8.03
   2 -14  -1   62.00    8.17
   2 -14  -1   62.51    7.82
  -2  14   2  130.96   12.17
   2 -14  -2  137.77   13.82
  -2  14   3   40.35    4.46
  -2  14   3   48.15    6.82
   2 -14  -3   38.98    6.38
   2 -14  -3   41.05    6.72
   2 -14  -3   41.64    8.03
  -2  14   4   11.60    2.58
  -2  14   4   16.03    4.78
   2 -14  -4   12.25    4.79
   2 -14  -4   11.94    4.59
   2 -14  -4   21.07    8.25
  -2  14   5   76.46    6.56
  -2  14   5   75.87    8.44
   2 -14  -5   78.88   10.14
   2 -14  -5   66.93    8.58
   2 -14  -5   71.25   13.45
  -2  14   6   62.74    5.89
  -2  14   6   48.65    6.29
   2 -14  -6   63.97    8.57
   2 -14  -6   54.93    7.83
  -2  14   7   13.30    2.93
  -2  14   7   14.01    4.20
   2 -14  -7   11.55    4.26
   2 -14  -7   11.90    4.77
   2 -14  -7    7.87   16.66
  -2  14   8   13.84    3.28
  -2  14   8   13.54    3.91
   2 -14  -8   16.48    4.56
   2 -14  -8   11.62    5.00
   2 -14  -8   17.64   19.33
  -2  14   9  195.80   15.51
  -2  14   9  143.71   11.98
   2 -14  -9  185.59   15.48
   2 -14  -9  159.04   14.91
   2 -14  -9  211.02   33.66
  -2  14  10  105.52   10.28
  -2  14  10   67.74    7.10
   2 -14 -10   86.25    8.72
   2 -14 -10   90.99   11.09
   2 -14 -10   87.66   17.09
  -2  14  11   -1.69    3.82
  -2  14  11    0.91    3.50
   2 -14 -11   -1.36    4.01
   2 -14 -11   -3.26    7.88
  -2  14  12   55.07    7.91
  -2  14  12   49.59    6.04
   2 -14 -12   58.41    7.13
   2 -14 -12   53.86    8.83
   2 -14 -12   55.09   10.61
  -2  14  13   55.04    8.62
  -2  14  13   47.42    5.87
   2 -14 -13   53.54    6.90
  -2  14  14   23.45    6.55
  -2  14  14   19.62    4.28
   2 -14 -14   24.09    5.05
   2 -14 -14   21.11    6.95
   2 -14 -14   21.35    6.20
   2 -14 -15    3.26    3.26
   2 -14 -15    2.56    4.97
   2 -14 -15    2.63    3.89
   2 -14 -16   46.90    7.28
   2 -14 -16   41.02    8.18
   2 -14 -17   32.63    6.71
   2 -14 -17   29.95    6.81
   2 -14 -18    2.86    4.52
  -2  15   1   59.05    6.40
   2 -15  -1   51.02    7.22
  -2  15   2    1.46    2.57
   2 -15  -2    1.16    3.52
   2 -15  -2    2.00    3.97
   2 -15  -2    3.13    4.92
  -2  15   3  115.39    9.35
   2 -15  -3  126.05   13.35
   2 -15  -3  117.49   12.88
   2 -15  -3  106.67   12.41
  -2  15   4   92.76    8.09
   2 -15  -4   82.11   10.82
   2 -15  -4   87.04   10.83
   2 -15  -4   63.78   11.66
  -2  15   5   17.04    3.44
  -2  15   5   16.24    5.57
   2 -15  -5   16.58    5.86
   2 -15  -5   23.83    6.28
   2 -15  -5   21.66   11.47
  -2  15   6   19.26    3.54
  -2  15   6   15.34    5.30
   2 -15  -6   20.70    5.85
   2 -15  -6   14.60    5.60
   2 -15  -6   15.07   16.40
  -2  15   7  127.89   10.97
  -2  15   7   96.38    9.72
   2 -15  -7   73.95   22.58
  -2  15   8  106.15    9.69
  -2  15   8   79.33    8.48
   2 -15  -8   96.13   10.32
   2 -15  -8  101.96   12.35
   2 -15  -8   99.11   25.20
   2 -15  -9    7.27    5.19
   2 -15  -9   13.45   19.71
  -2  15  10   16.29    4.82
   2 -15 -10   16.40    4.40
   2 -15 -10   16.19    6.78
   2 -15 -10    7.26   12.10
  -2  15  11   55.72    8.21
   2 -15 -11   51.87    6.93
   2 -15 -11   44.86    9.67
   2 -15 -11   43.54   12.64
  -2  15  12   41.30    7.63
   2 -15 -12   45.28    6.63
   2 -15 -12   38.57    9.23
  -2  15  13    3.03    5.25
   2 -15 -13    5.87    3.45
   2 -15 -13    2.53    5.95
   2 -15 -13    3.94    5.81
  -2  15  14   15.43    6.41
   2 -15 -14   19.98    5.16
   2 -15 -14   28.79    8.40
   2 -15 -14   21.26    6.38
   2 -15 -15   64.00    8.99
   2 -15 -15   53.76   10.27
   2 -15 -15   49.84    7.82
   2 -15 -16   13.53    5.75
   2 -15 -16    3.75    5.24
   2 -15 -17    3.63    6.21
   2 -15 -17    2.89    5.78
  -2  16   1   49.75    6.26
   2 -16  -1   48.15    8.33
  -2  16   2  176.64   13.86
   2 -16  -2  199.64   19.24
   2 -16  -2  189.68   19.05
   2 -16  -2  155.04   15.65
  -2  16   3   72.48    7.23
   2 -16  -3   78.00   11.49
   2 -16  -3   77.13   11.29
   2 -16  -3   69.55   11.48
  -2  16   4    1.52    2.71
   2 -16  -4    0.48    4.72
   2 -16  -4    0.86    4.64
   2 -16  -4    2.97    7.61
  -2  16   5   27.52    4.42
   2 -16  -5   27.96    7.75
   2 -16  -5   28.05    7.57
   2 -16  -5   29.03   13.39
  -2  16   6   89.78    8.65
   2 -16  -6   89.29   11.66
   2 -16  -6   81.59   11.87
   2 -16  -6   57.55   17.19
  -2  16   7   55.06    6.72
   2 -16  -7   55.09    8.56
   2 -16  -7   46.16    9.35
  -2  16   8    3.34    3.55
   2 -16  -8    3.08    4.10
   2 -16  -8    4.74    5.82
   2 -16  -8    0.42   18.50
  -2  16   9   42.83    6.82
   2 -16  -9   40.51    6.96
   2 -16  -9   50.73   21.70
  -2  16  10   33.99    6.69
   2 -16 -10   37.72    6.69
   2 -16 -10   38.63    9.79
   2 -16 -10   43.89   15.12
  -2  16  11   23.40    6.28
   2 -16 -11   20.03    5.53
   2 -16 -11   12.13    7.65
   2 -16 -11   27.51   11.01
  -2  16  12    5.45    5.01
   2 -16 -12    7.24    4.56
   2 -16 -12   -4.06    6.65
   2 -16 -13   81.35   14.02
   2 -16 -13   55.73    9.29
   2 -16 -14   46.09    8.46
   2 -16 -14   29.47    9.52
   2 -16 -14   26.83    6.61
   2 -16 -15   -0.20    4.08
  -2  17   1   55.71    7.36
   2 -17  -1   65.06   10.32
   2 -17  -1   58.55   11.61
   2 -17  -1   54.48    8.69
  -2  17   2    6.24    3.82
   2 -17  -2    4.34    5.71
   2 -17  -2   13.95    7.27
   2 -17  -2    4.73    5.64
  -2  17   3    8.28    3.92
   2 -17  -3    1.68    6.34
   2 -17  -3    0.31    5.79
   2 -17  -3   -0.14    7.37
  -2  17   4   32.73    5.60
   2 -17  -4   36.89    9.63
   2 -17  -4   29.95    8.85
   2 -17  -4   20.64    9.90
  -2  17   5   44.44    6.53
   2 -17  -5   45.17   10.17
   2 -17  -5   50.82   10.60
   2 -17  -5   40.92   14.40
  -2  17   6    6.57    3.96
   2 -17  -6    4.48    5.47
   2 -17  -6    4.99    5.94
   2 -17  -6    6.69   11.78
  -2  17   7    6.31    4.30
   2 -17  -7    9.42    5.49
   2 -17  -7   12.31    7.39
  -2  17   8   45.44    7.23
   2 -17  -8   42.06    8.62
   2 -17  -8   37.14   10.04
   2 -17  -8   24.76   16.48
  -2  17   9   25.51    6.26
   2 -17  -9   30.81    7.31
   2 -17  -9   25.23    9.30
   2 -17  -9   16.25   12.95
  -2  17  10   -1.88    4.93
   2 -17 -10    1.10    5.07
   2 -17 -10   -4.54    6.56
   2 -17 -10    4.21    9.68
   2 -17 -11   27.38    9.46
   2 -17 -11   12.64    8.29
   2 -17 -12   30.62    8.37
   2 -18  -1    0.88    7.75
   2 -18  -2   27.28   10.83
   2 -18  -2   22.54    8.97
   2 -18  -3   51.27   13.41
   2 -18  -3   30.80    9.93
   2 -18  -4   10.75   10.45
   2 -18  -4    8.22    7.48
   2 -18  -5    8.84   10.57
   2 -18  -5    7.31    7.65
   1  18  -1   60.13    8.07
   1  18  -2   19.00    5.00
  -1 -17   1    8.95    6.06
  -1 -17   1    6.99    4.74
   1  17  -1    3.55    4.10
  -1 -17   2    7.99    6.21
   1  17  -3   59.00    8.18
   1  17  -4   42.07    6.98
   1  17  -5    1.31    3.57
  -1 -16   1  117.36   13.30
  -1 -16   1   95.75   10.22
   1  16  -1   99.13    9.92
  -1 -16   2  106.98   10.81
   1  16  -2  109.33   11.05
  -1 -16   3   19.13    6.86
  -1 -16   3   21.98    4.73
   1  16  -3   18.34    5.37
  -1 -16   4   31.50    8.41
  -1 -16   4   25.22    4.44
   1  16  -4   30.82    6.35
  -1 -16   5  108.07   13.78
  -1 -16   5   82.48    8.70
   1  16  -5   83.68   10.74
   1  16  -6   30.19    6.85
  -1 -15   1   61.43    8.98
  -1 -15   1   50.43    6.70
   1  15  -1   48.12    6.25
  -1 -15   2    4.65    3.72
  -1 -15   2    0.56    3.13
   1  15  -2    5.69    3.66
  -1 -15   3  101.15   11.66
  -1 -15   3   95.27    9.43
  -1 -15   4   71.42    9.93
   1  15  -4   81.97    9.50
  -1 -15   5   -1.78    4.26
  -1 -15   5    1.05    3.27
   1  15  -5   -1.51    3.73
  -1 -15   6   17.67    5.76
  -1 -15   6   17.78    3.83
   1  15  -6   20.68    6.02
  -1 -15   7   46.06    8.29
  -1 -15   7   51.03    6.32
   1  15  -7   37.21    7.80
   1  15  -8   24.70    6.61
   1  15  -9    1.44    4.61
  -1 -14   1   93.02   10.18
  -1 -14   1   79.55    8.23
   1  14  -1   99.18    9.17
  -1 -14   2  222.23   18.07
   1  14  -2  263.51   20.02
  -1 -14   3   51.68    7.43
  -1 -14   3   66.34    7.54
   1  14  -3   50.53    6.23
  -1 -14   4   24.17    5.80
  -1 -14   4   25.60    4.74
   1  14  -4   24.93    4.90
  -1 -14   5   93.60   10.78
  -1 -14   5   96.39    9.20
  -1 -14   6   48.33    7.74
  -1 -14   6   53.06    6.26
   1  14  -6   51.78    7.54
  -1 -14   7   13.18    4.71
   1  14  -7   13.16    5.12
  -1 -14   8   27.00    6.68
  -1 -14   8   31.48    4.78
   1  14  -8   38.78    7.76
  -1 -14   9  152.90   15.35
  -1 -14   9  140.37   11.68
   1  14  -9  158.72   16.20
   1  14 -10   18.57    6.60
  -1 -13   1  101.33    9.78
  -1 -13   1  107.51   10.29
   1  13  -1  106.40    9.12
  -1 -13   2   -0.78    2.49
  -1 -13   2   -2.24    3.11
  -1 -13   3  149.53   13.20
  -1 -13   3  142.29   12.12
   1  13  -3  157.02   12.88
   1  13  -3  138.84   12.97
  -1 -13   4  191.80   15.73
   1  13  -4  198.91   15.55
   1  13  -4  196.68   17.02
  -1 -13   5   70.07    8.56
   1  13  -5   77.27    8.18
  -1 -13   6    3.25    3.35
  -1 -13   6    1.47    2.92
   1  13  -6    4.17    3.03
  -1 -13   7  160.85   14.72
  -1 -13   7  162.94   13.62
  -1 -13   8  110.57    9.78
   1  13  -8  117.83   12.12
  -1 -13   9    0.26    3.09
  -1 -13   9    4.23    2.83
   1  13  -9   -1.37    3.39
  -1 -13  10   20.29    5.54
  -1 -13  10   24.18    3.94
  -1 -13  11   29.36    4.30
   1  13 -11   22.43    6.99
   1  13 -12   28.62    7.49
  -1 -12   1  126.83   10.97
   1  12  -1  124.48    9.71
  -1 -12   2  147.60   12.49
  -1 -12   2  140.78   12.16
   1  12  -2  139.42   10.87
  -1 -12   3   64.91    7.10
  -1 -12   3   72.24    7.57
   1  12  -3   68.64    6.65
   1  12  -3   69.99    7.61
  -1 -12   4    6.24    2.96
  -1 -12   4    4.49    2.96
  -1 -12   5   33.02    5.40
  -1 -12   5   34.74    4.66
   1  12  -5   35.14    5.06
  -1 -12   6  172.79   14.14
   1  12  -6  178.33   14.46
  -1 -12   7   33.98    5.62
  -1 -12   7   46.77    5.49
   1  12  -7   40.17    5.87
  -1 -12   8    8.47    3.61
  -1 -12   8   12.73    3.17
   1  12  -8   16.25    4.45
  -1 -12   9   47.65    6.91
  -1 -12   9   52.17    5.79
   1  12  -9   47.67    7.22
  -1 -12  10   37.08    6.20
  -1 -12  10   48.09    5.51
   1  12 -10   48.47    7.68
  -1 -12  11   16.25    4.92
  -1 -12  11   27.85    4.34
   1  12 -11   19.68    5.76
  -1 -12  12    4.06    3.75
  -1 -12  12    6.18    2.73
   1  12 -12    5.31    4.40
  -1 -12  13   47.83    5.48
   1  12 -13   48.44    8.63
  -1 -11   1  217.65   15.72
  -1 -11   1  254.16   20.93
   1  11  -1  229.23   15.97
  -1 -11   2   23.48    4.26
   1  11  -2   15.42    2.79
  -1 -11   3   32.77    4.65
  -1 -11   3   34.52    4.84
   1  11  -3   33.42    4.12
   1  11  -3   32.04    4.88
  -1 -11   4  214.51   16.12
   1  11  -4  228.78   16.85
   1  11  -4  218.28   17.95
  -1 -11   5  209.62   15.60
  -1 -11   5  238.34   19.12
   1  11  -5  232.51   17.29
   1  11  -5  232.03   19.88
  -1 -11   6    0.76    2.05
  -1 -11   6    0.36    2.19
  -1 -11   7   68.34    7.44
  -1 -11   7   73.59    7.12
   1  11  -7   77.33    8.05
  -1 -11   8   93.16    9.09
  -1 -11   8  113.80   10.21
   1  11  -8  105.20   10.08
  -1 -11   9   15.99    3.99
  -1 -11   9   15.87    3.37
   1  11  -9   16.72    4.43
  -1 -11  10   -0.72    2.72
  -1 -11  10   -1.00    2.51
  -1 -11  11   27.36    4.03
   1  11 -11   30.11    5.99
  -1 -11  12   64.13    7.72
  -1 -11  12   73.88    7.32
   1  11 -12   80.72   10.07
  -1 -11  13    3.89    3.38
   1  11 -13    6.66    4.31
  -1 -11  14    9.28    3.08
   1  11 -14    7.78    4.52
  -1 -11  15   14.77    3.55
  -1 -10   1    9.40    2.43
  -1 -10   1   14.24    3.90
  -1 -10   2  128.22   10.16
  -1 -10   2  134.97   11.63
   1  10  -2  133.30   10.10
  -1 -10   3  304.14   21.47
  -1 -10   3  339.89   26.99
   1  10  -3  320.14   22.41
   1  10  -3  258.69   19.53
  -1 -10   4   55.89    5.86
   1  10  -4   47.23    4.92
   1  10  -4   57.91    6.40
  -1 -10   5   66.03    6.66
  -1 -10   5   66.26    6.47
   1  10  -5   69.17    6.58
   1  10  -5   66.50    6.99
  -1 -10   6  233.20   17.08
  -1 -10   6  258.43   20.53
   1  10  -6  246.45   17.87
  -1 -10   7   83.05    8.17
   1  10  -7   81.91    7.80
  -1 -10   8    1.91    2.59
  -1 -10   8    4.34    2.78
   1  10  -8    4.59    2.63
  -1 -10   9   32.23    4.34
   1  10  -9   33.87    5.20
  -1 -10  10   70.63    7.66
  -1 -10  10   84.39    8.02
   1  10 -10   80.63    8.67
  -1 -10  11   31.38    5.72
  -1 -10  11   44.27    5.30
  -1 -10  12    1.68    2.51
   1  10 -12    1.07    2.93
  -1 -10  13   12.98    3.99
  -1 -10  13   30.05    4.40
   1  10 -13   17.37    4.75
  -1 -10  14   18.38    4.58
  -1 -10  14   28.27    4.23
   1  10 -14   18.45    5.22
  -1 -10  15   10.04    3.14
   1  10 -15    5.32    4.32
  -1 -10  16    2.65    2.70
  -1  -9   1  314.24   20.50
   1   9  -1  375.56   26.23
  -1  -9   2  296.23   20.06
  -1  -9   2  319.31   24.76
  -1  -9   3   14.46    2.75
  -1  -9   3   12.12    2.67
   1   9  -3   13.71    3.50
  -1  -9   4  285.54   19.74
  -1  -9   4  308.33   24.04
   1   9  -4  284.92   22.19
  -1  -9   5   69.69    6.42
  -1  -9   5   90.83    8.40
  -1  -9   6    1.47    1.91
  -1  -9   6    5.94    2.43
  -1  -9   7   10.09    2.84
  -1  -9   7    9.93    2.81
  -1  -9   8   75.94    7.13
  -1  -9   8  102.05    9.37
  -1  -9   9   95.53    8.75
  -1  -9   9  120.03   10.80
  -1  -9  10    9.60    2.91
  -1  -9  11  102.54    9.36
  -1  -9  11  116.52   10.33
  -1  -9  12   53.08    6.21
  -1  -9  12   78.87    7.96
  -1  -9  13   16.77    3.92
   1   9 -13   20.49    4.81
  -1  -9  14    1.33    2.56
  -1  -9  14    0.79    2.83
   1   9 -14    0.28    2.74
  -1  -9  15    8.59    3.10
  -1  -9  15    7.32    3.31
   1   9 -15    8.17    4.08
  -1  -9  16   41.07    5.42
   1   9 -16   38.12    7.08
  -1  -9  17   14.26    3.70
  -1  -8   1   74.32    6.13
  -1  -8   1   90.38    8.34
   1   8  -1   72.88    5.63
  -1  -8   2  175.73   12.64
  -1  -8   2  177.82   14.13
   1   8  -2  174.21   12.06
   1   8  -2  183.04   14.98
  -1  -8   3  303.22   20.89
  -1  -8   3  307.96   23.74
   1   8  -3  304.03   20.49
   1   8  -3  276.39   20.73
  -1  -8   4  140.59   10.75
   1   8  -4  124.54    8.87
   1   8  -4  158.82   13.65
  -1  -8   5   34.44    3.94
  -1  -8   5   43.21    4.66
   1   8  -5   48.14    5.57
[truncated: 833,521 more chars]
